# Supplementary figures and images for: Uncovering miRNA-mRNA Regulatory Modules in Developing Xylem of Pinus massoniana via Small RNA and Degradome Sequencing (part 1 of 9)
Source: MDPI journal article supplement (doi:10.3390/ijms221810154), 2021-09-21

**T=Cluster-18410.73354\_Q=novel\_107\_S=1148**

category=2\_p=0.0673240995462872

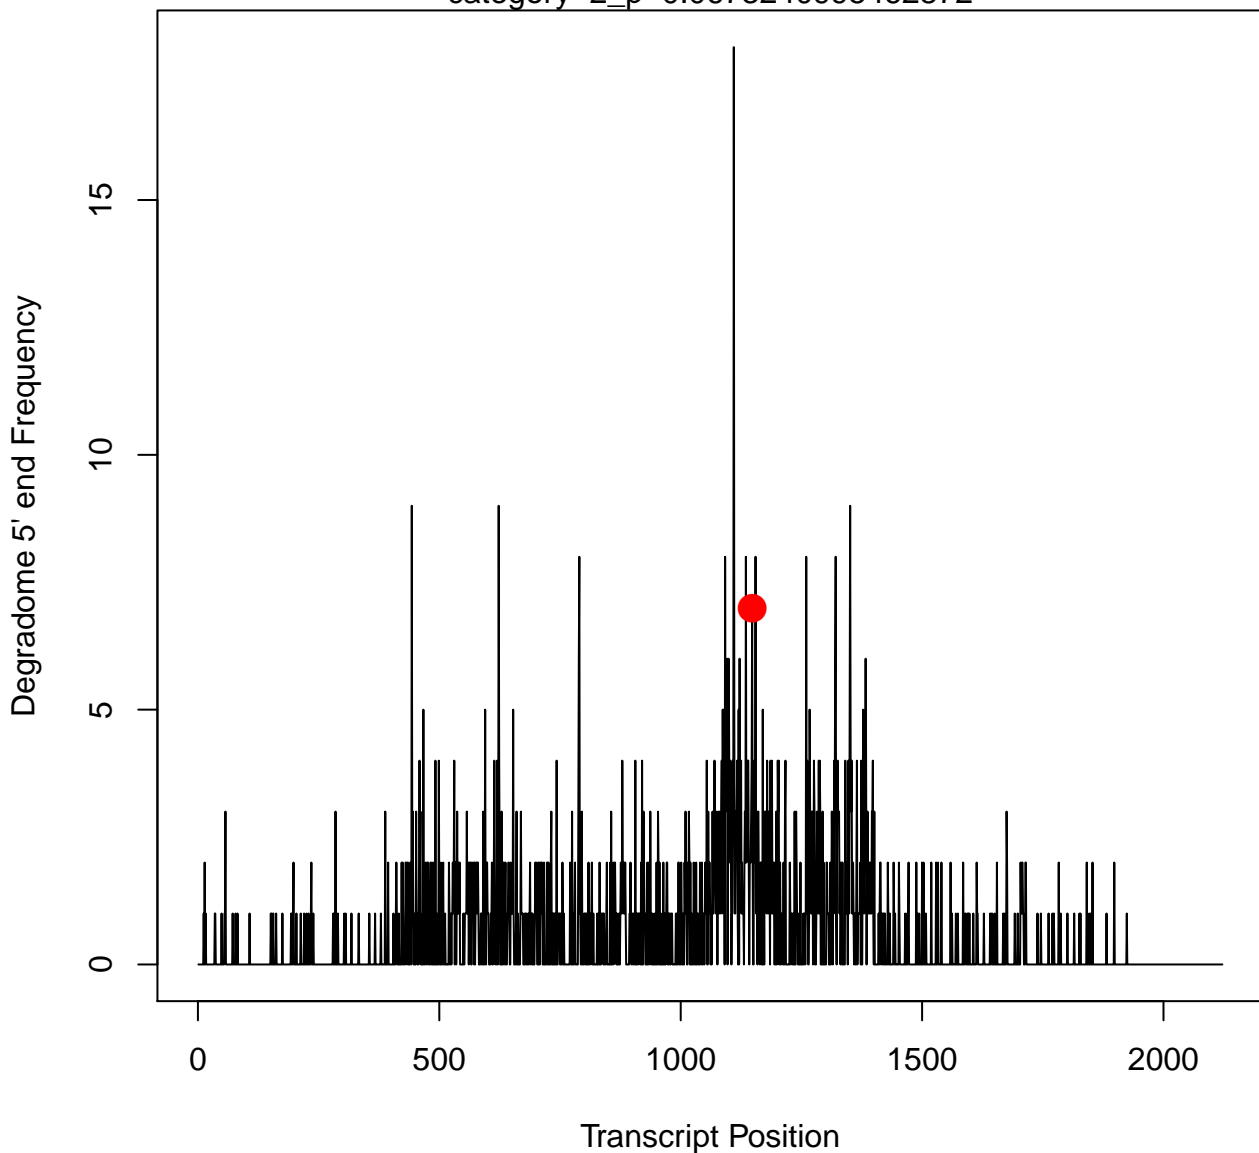

Supplement: s1 [file s1]

**T=Cluster-18410.109051\_Q=novel\_146\_S=929**

category=0\_p=0.00245961596621247

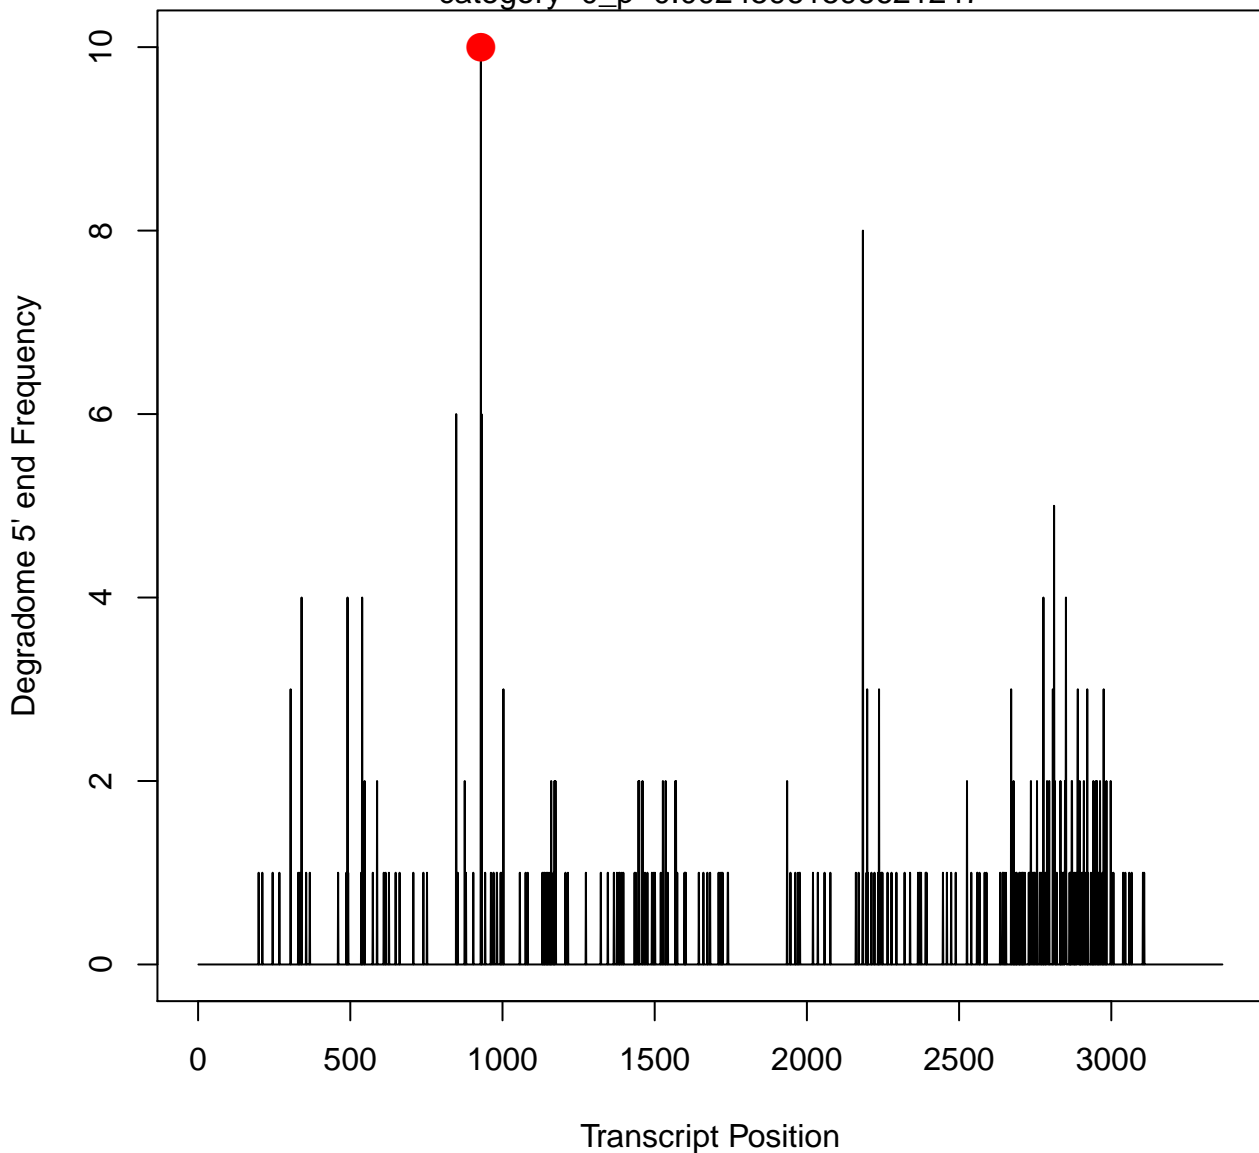

Supplement: s1 [file s1]

**T=Cluster-18410.18323\_Q=novel\_114\_S=1927**

category=0\_p=0.0135882009795663

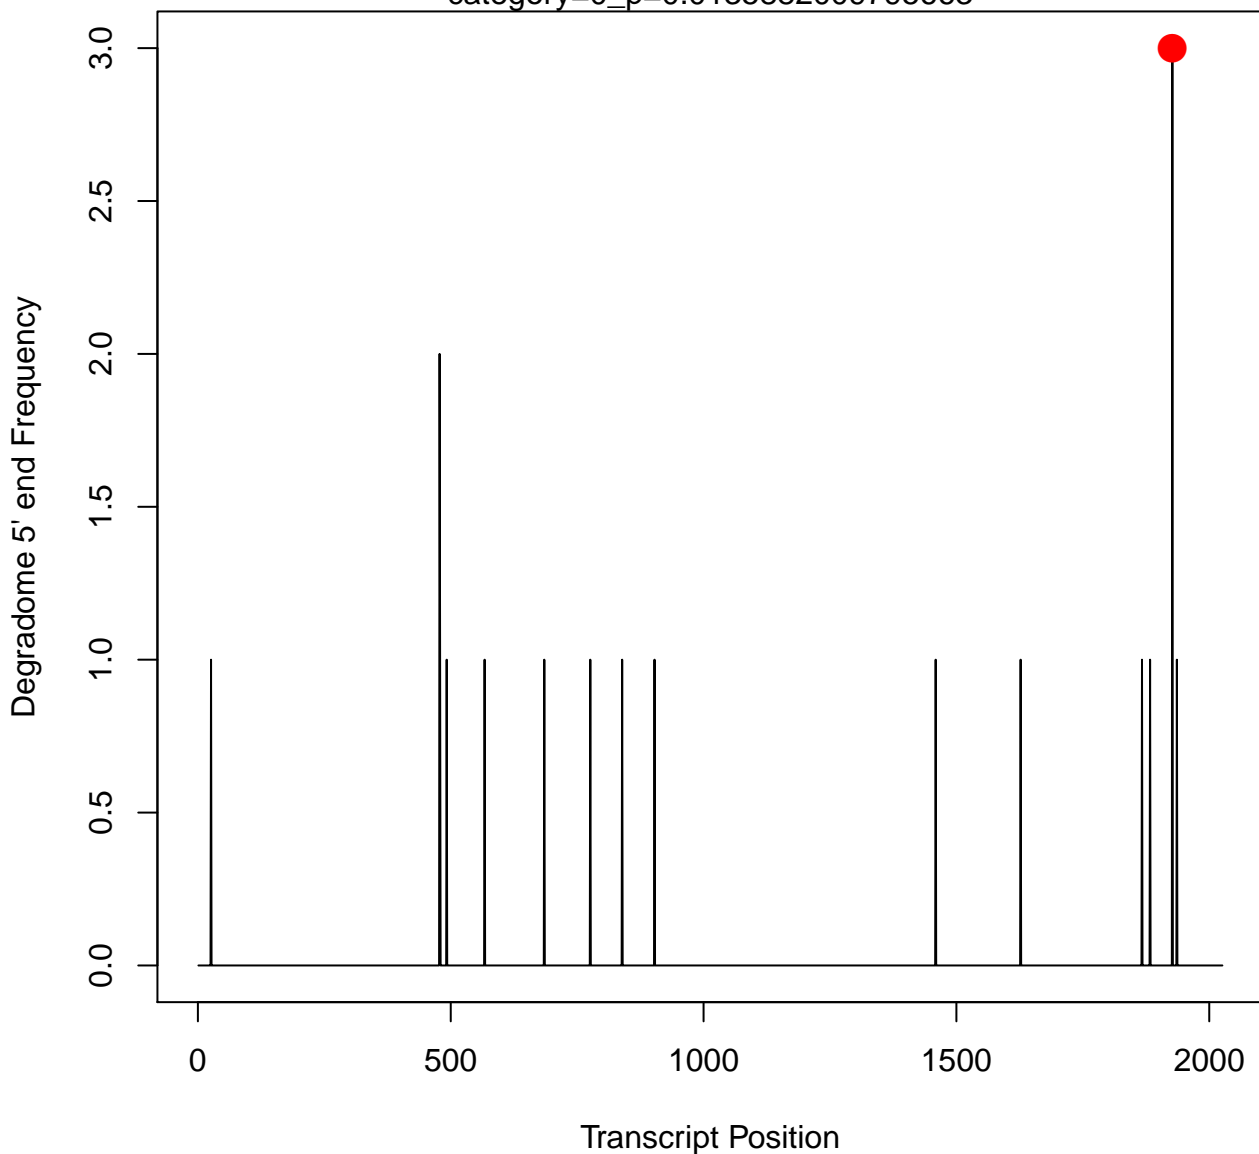

Supplement: s1 [file s1]

**T=Cluster-18410.80243\_Q=novel\_107\_S=2815**

category=2\_p=0.0564267304887326

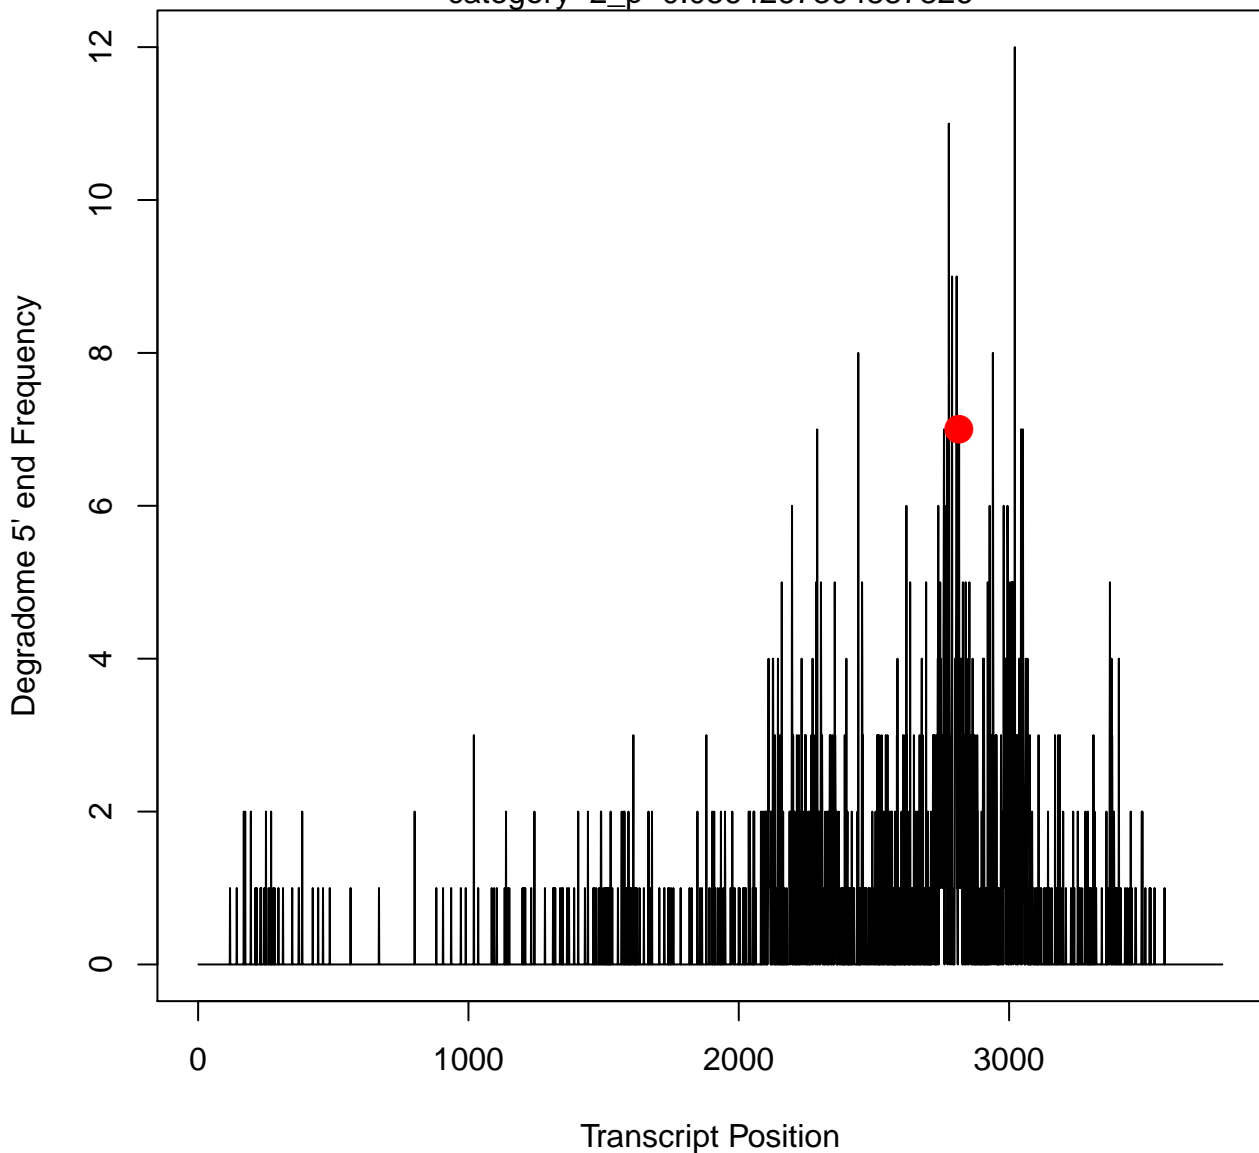

Supplement: s1 [file s1]

**T=Cluster-18410.55162\_Q=novel\_183\_S=452**

category=0\_p=0.00191355797950399

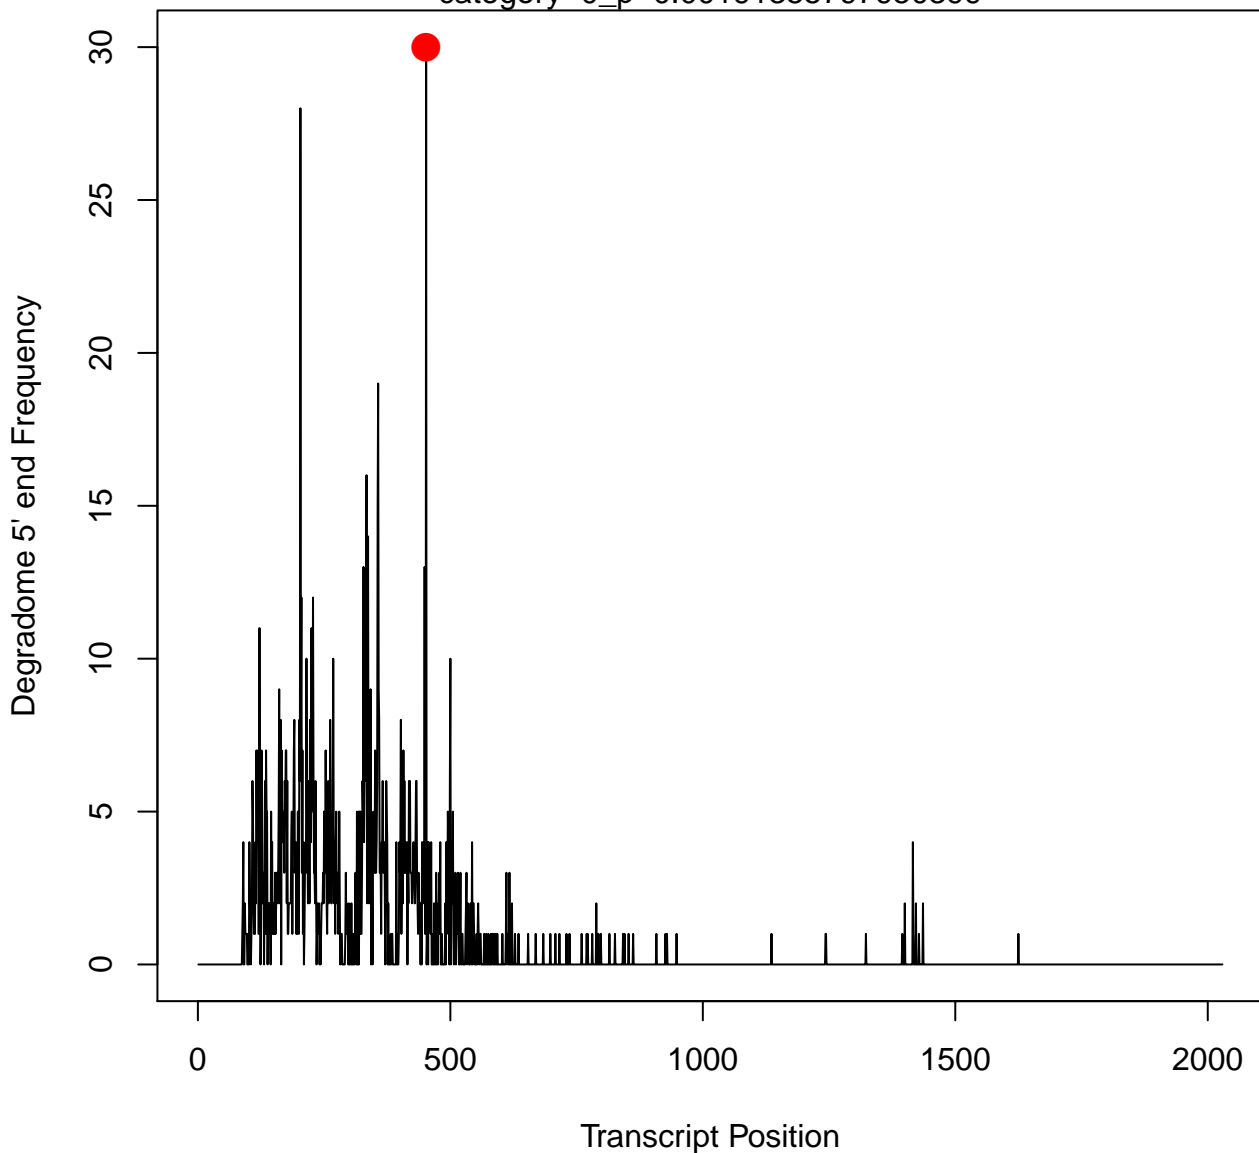

Supplement: s1 [file s1]

**T=Cluster-18410.8732\_Q=novel\_27\_S=1106**

category=1\_p=0.0403419616904988

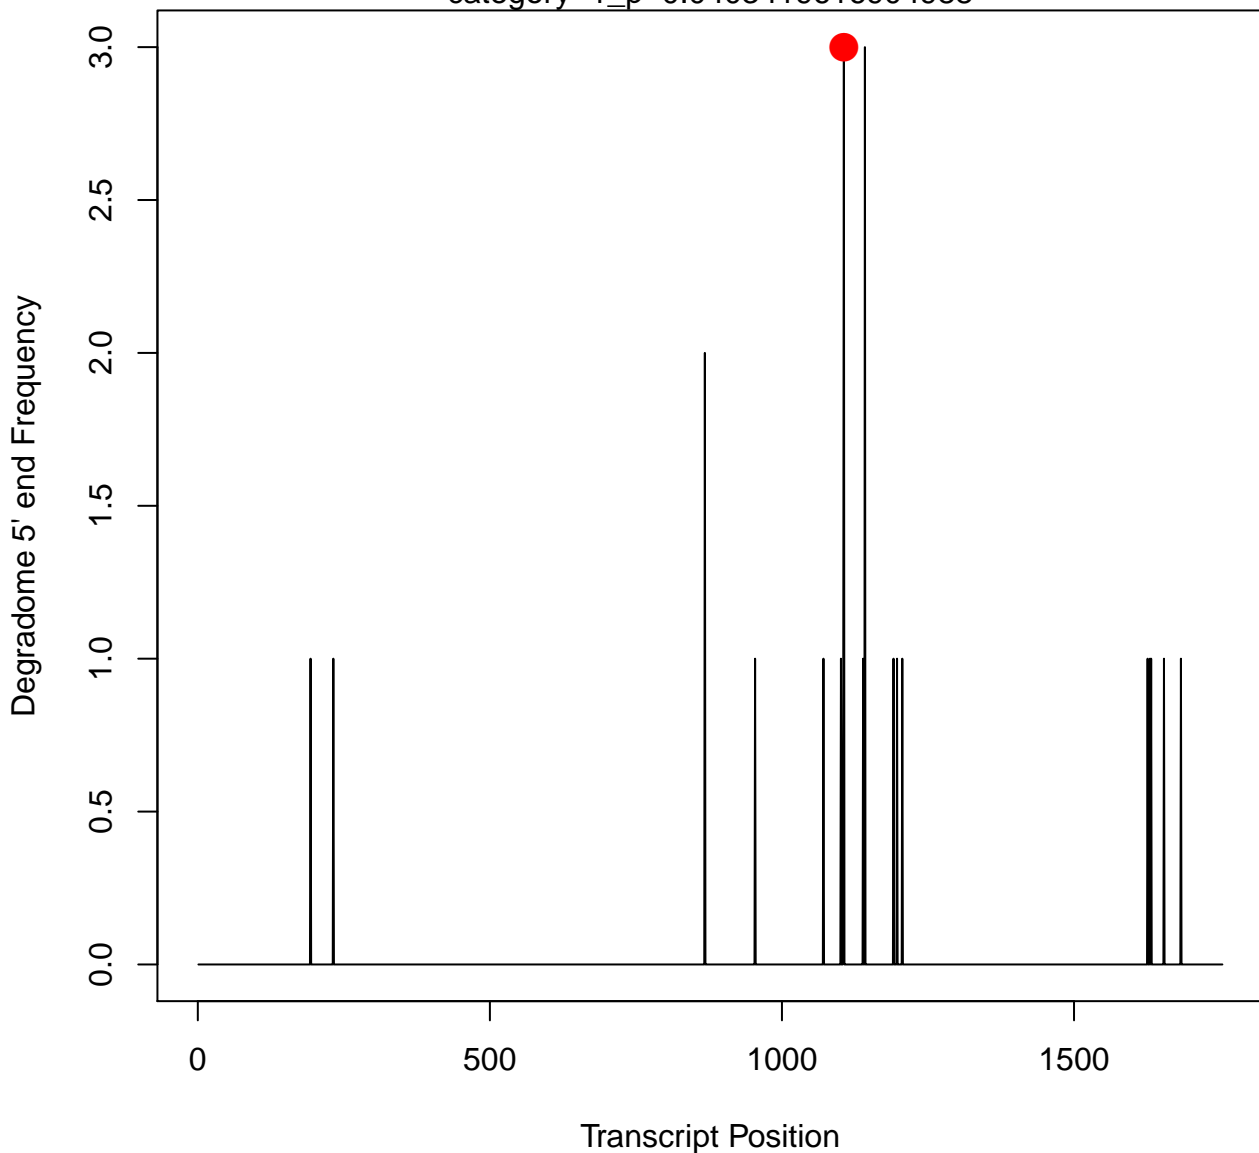

Supplement: s1 [file s1]

**T=Cluster-18410.27420\_Q=novel\_28\_S=311**

category=0\_p=0.00027358987754178

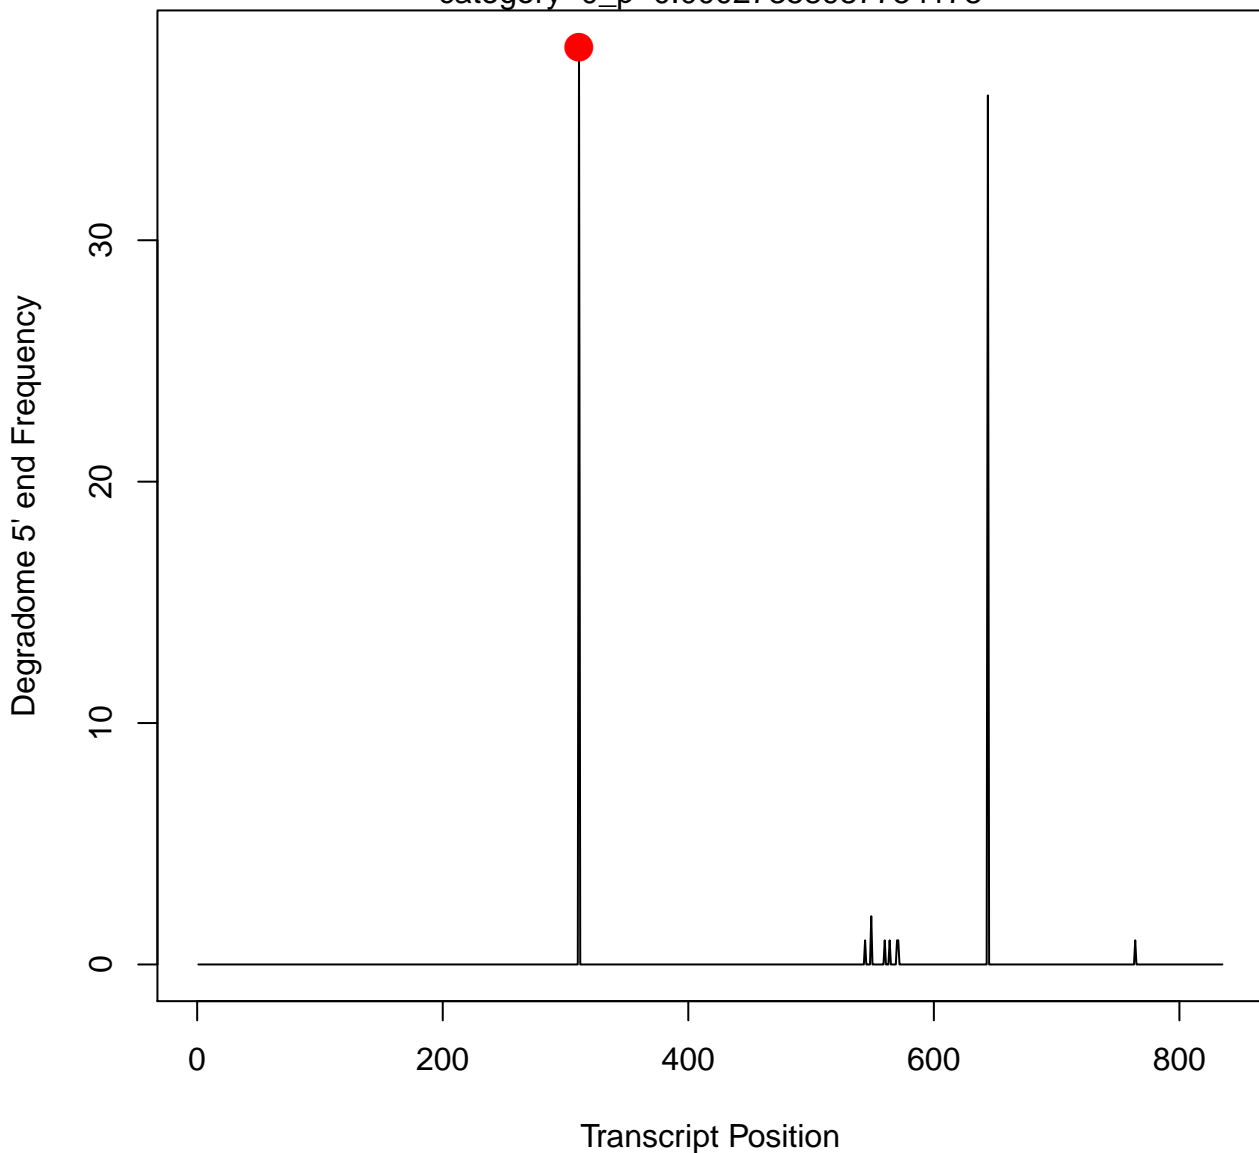

Supplement: s1 [file s1]

**T=Cluster-18410.19951\_Q=novel\_151\_S=330**

category=2\_p=0.0780956144108357

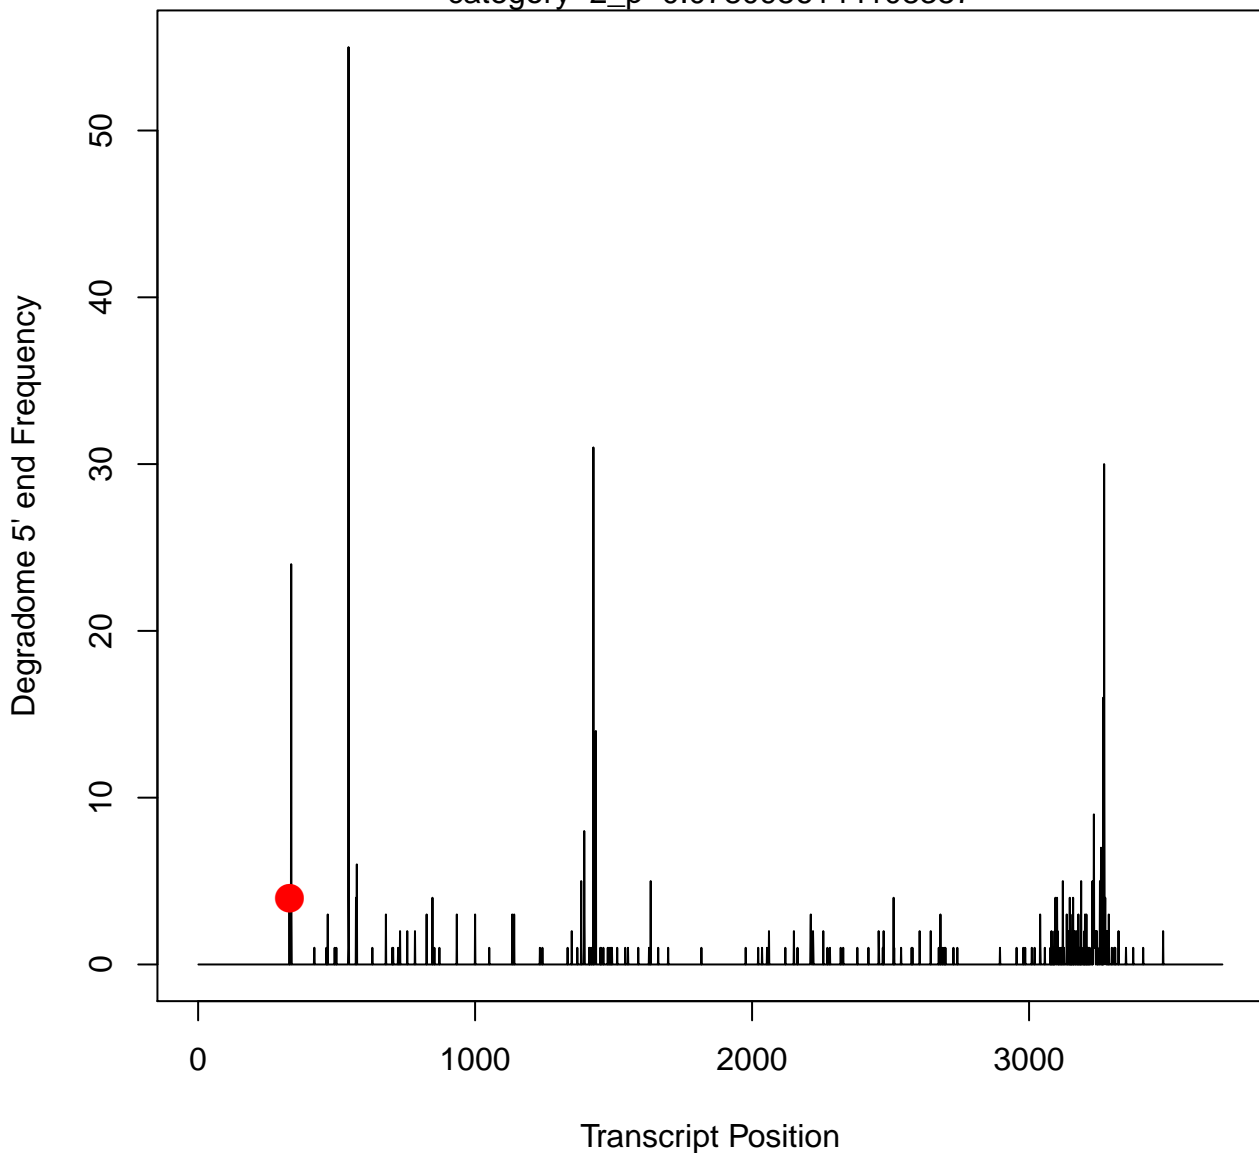

Supplement: s1 [file s1]

**T=Cluster-18410.109052\_Q=novel\_146\_S=929**

category=0\_p=0.00300537520191857

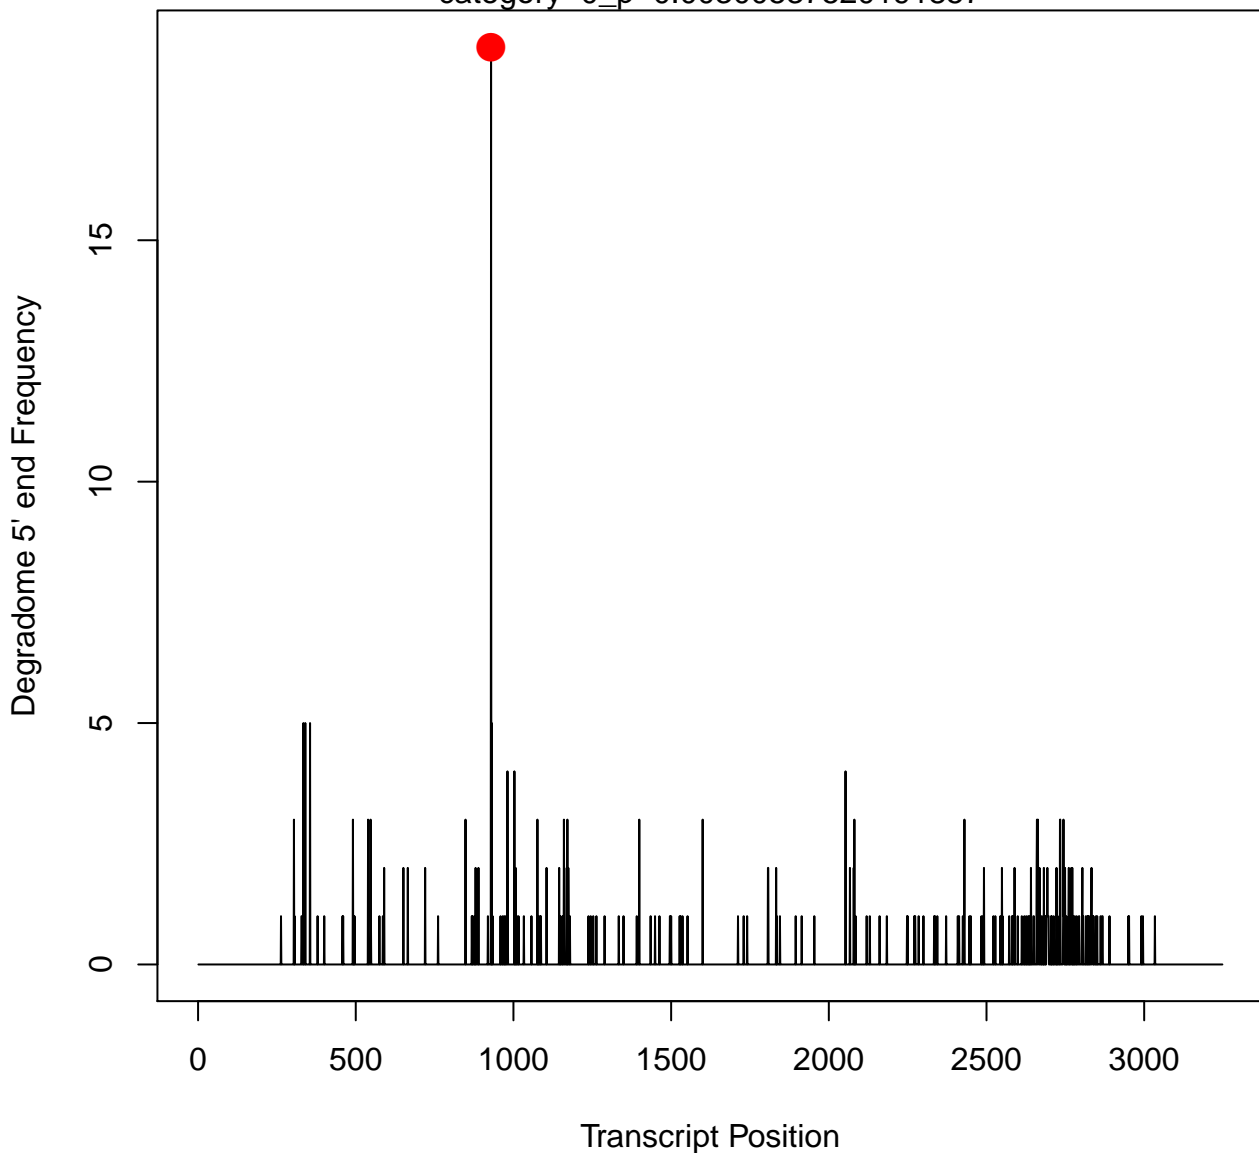

Supplement: s1 [file s1]

**T=Cluster-18410.105484\_Q=novel\_15\_S=267**

category=0\_p=0.00027358987754178

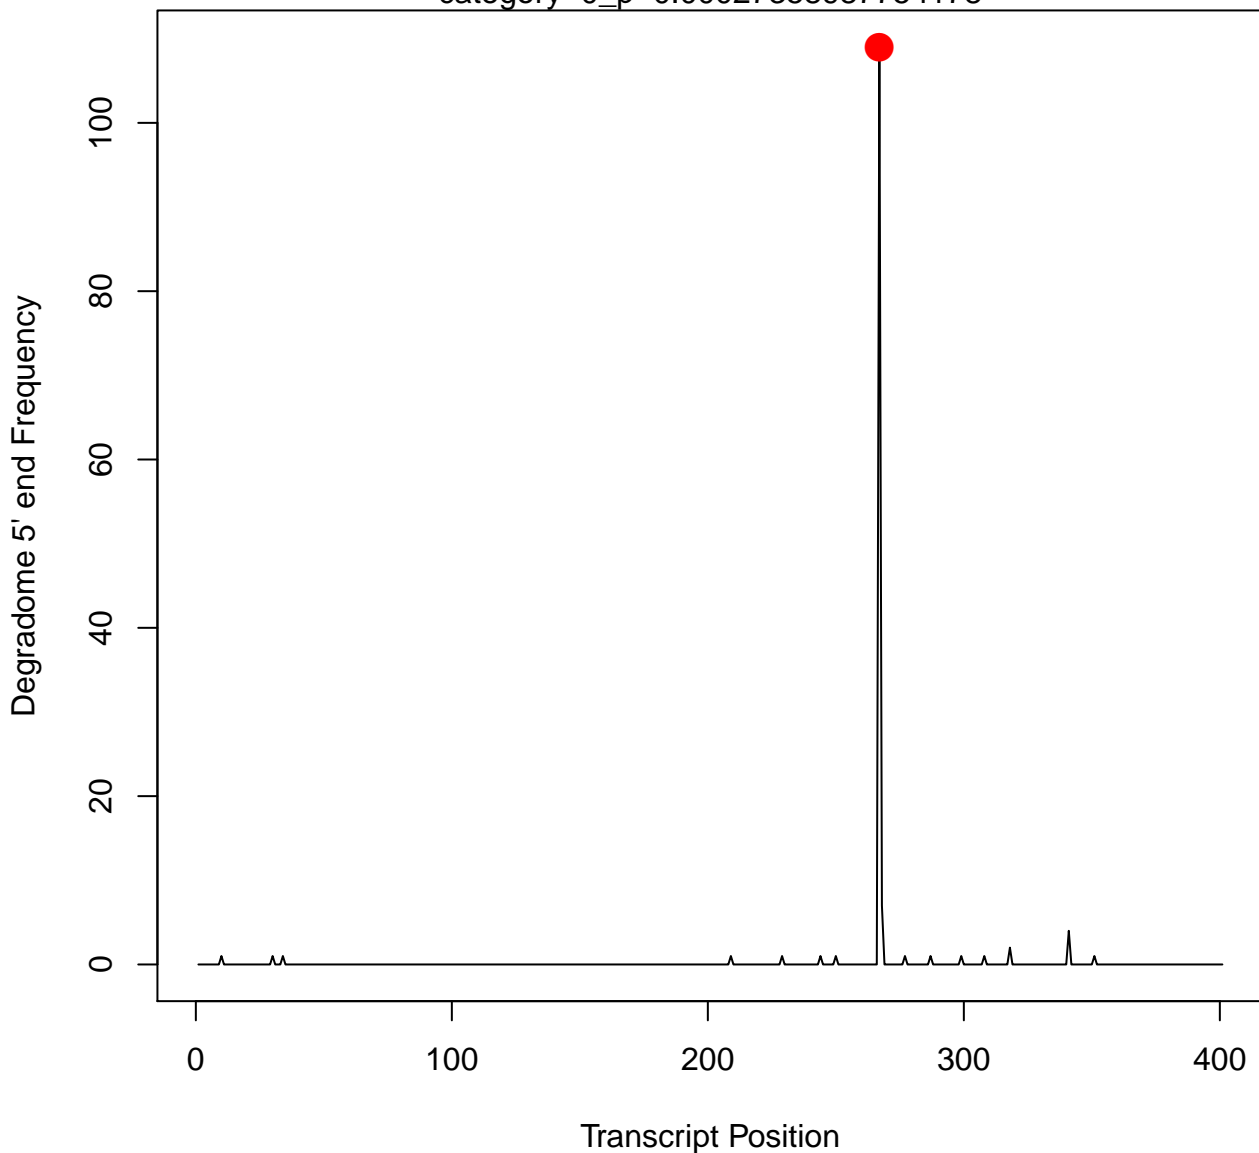

Supplement: s1 [file s1]

**T=Cluster-18410.62353\_Q=pma-miR1311\_S=798**

category=3\_p=0.0107970886967577

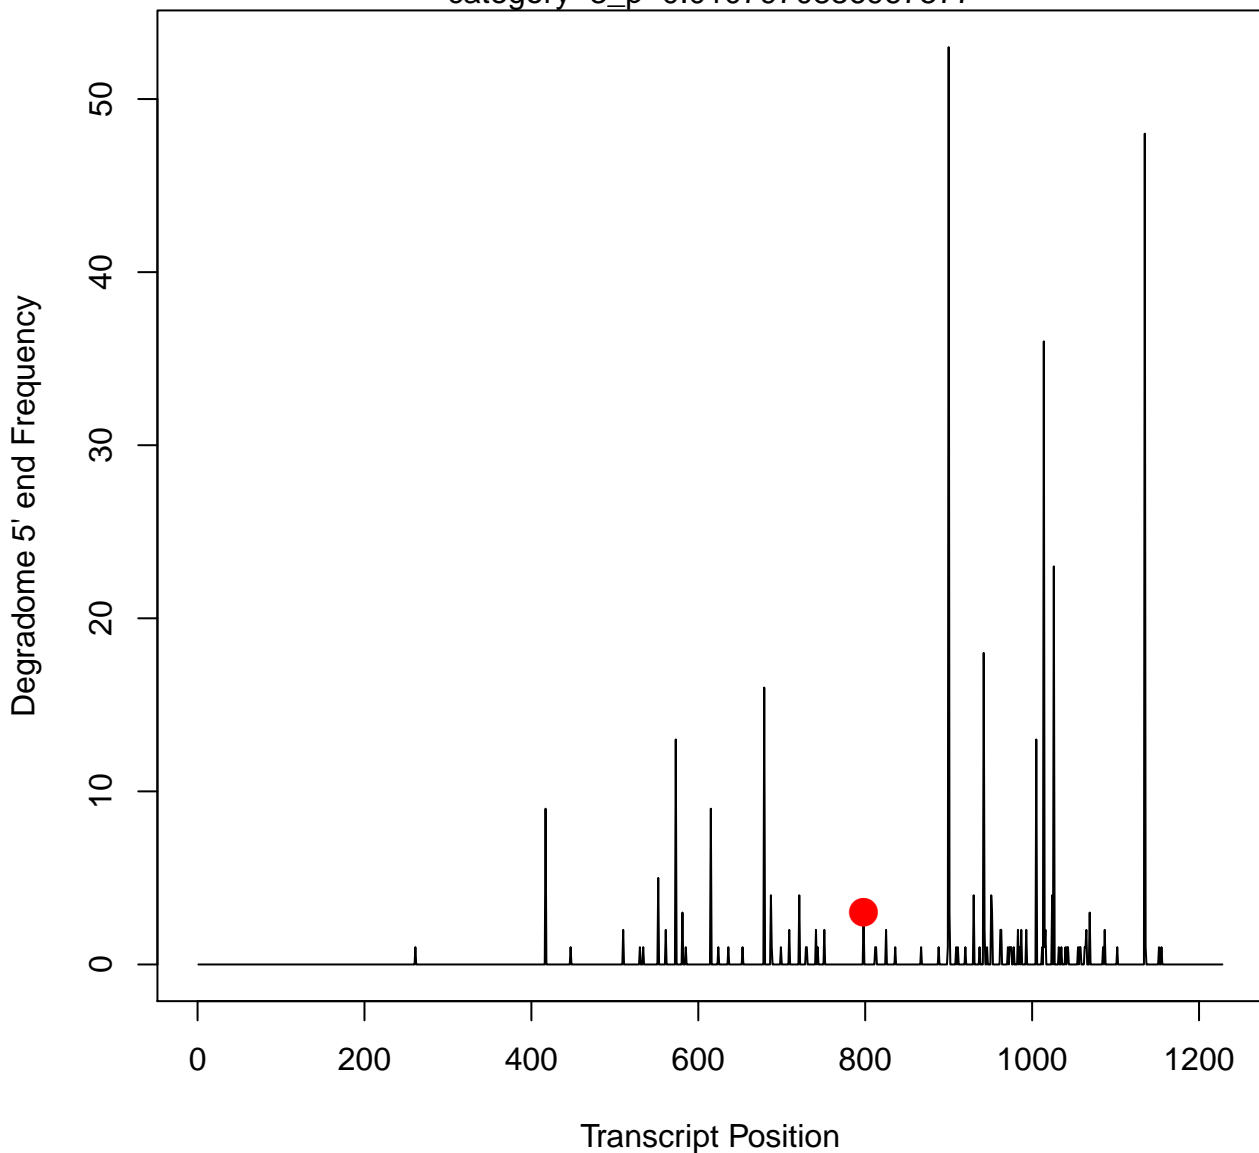

Supplement: s1 [file s1]

**T=Cluster-20899.0\_Q=novel\_9\_S=341**

category=0\_p=0.00109391048354923

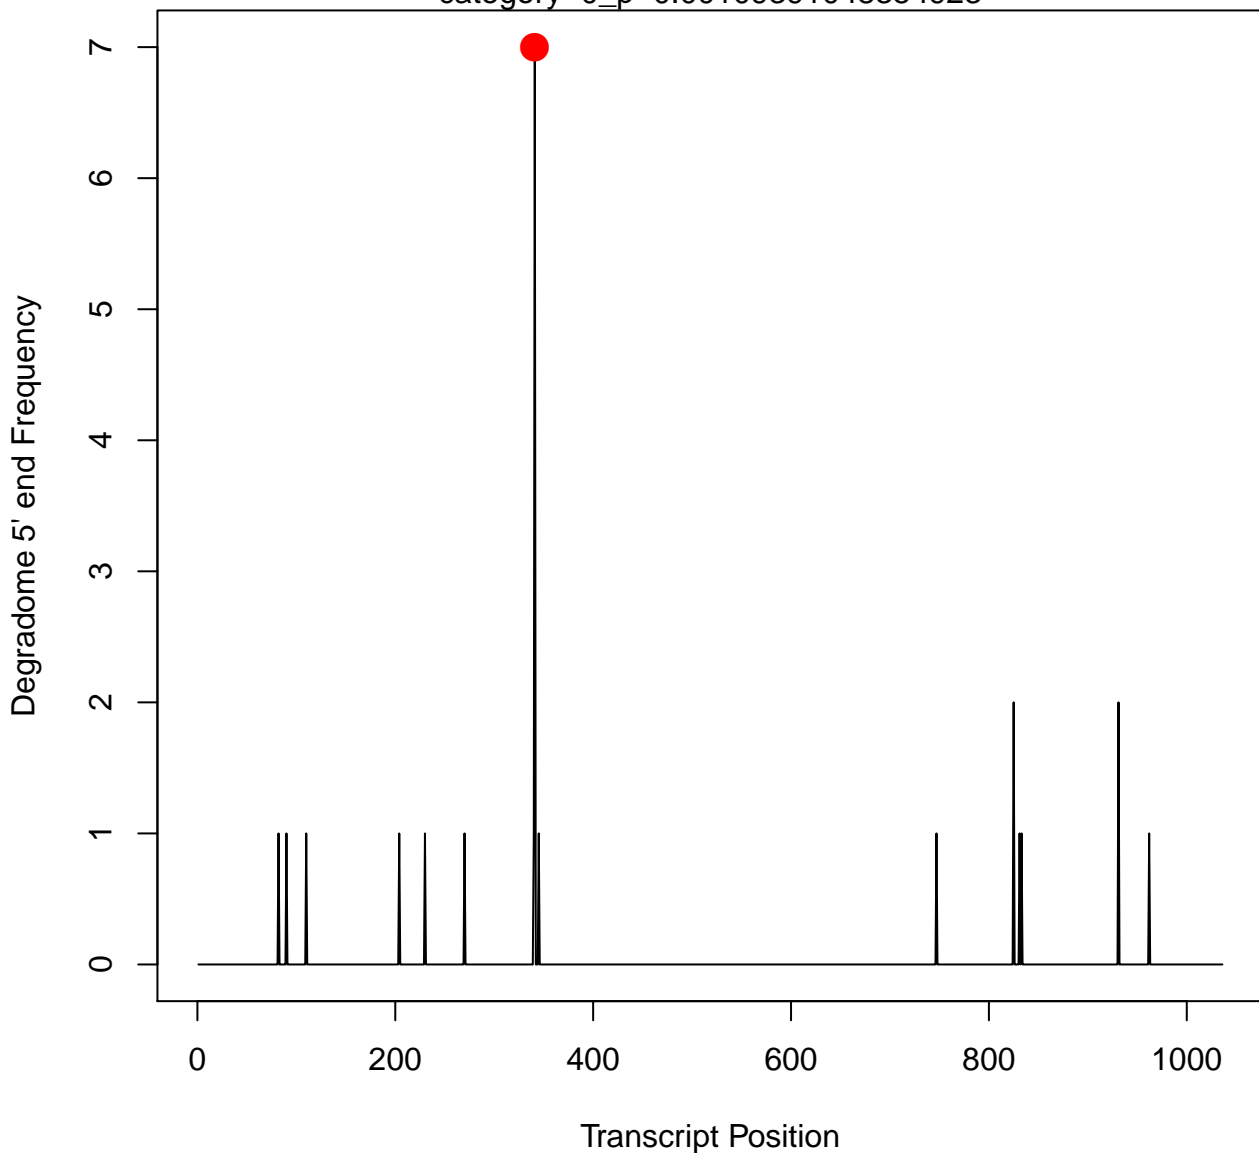

Supplement: s1 [file s1]

**T=Cluster-18410.114722\_Q=novel\_2\_S=1255**

category=0\_p=0.00871785114912016

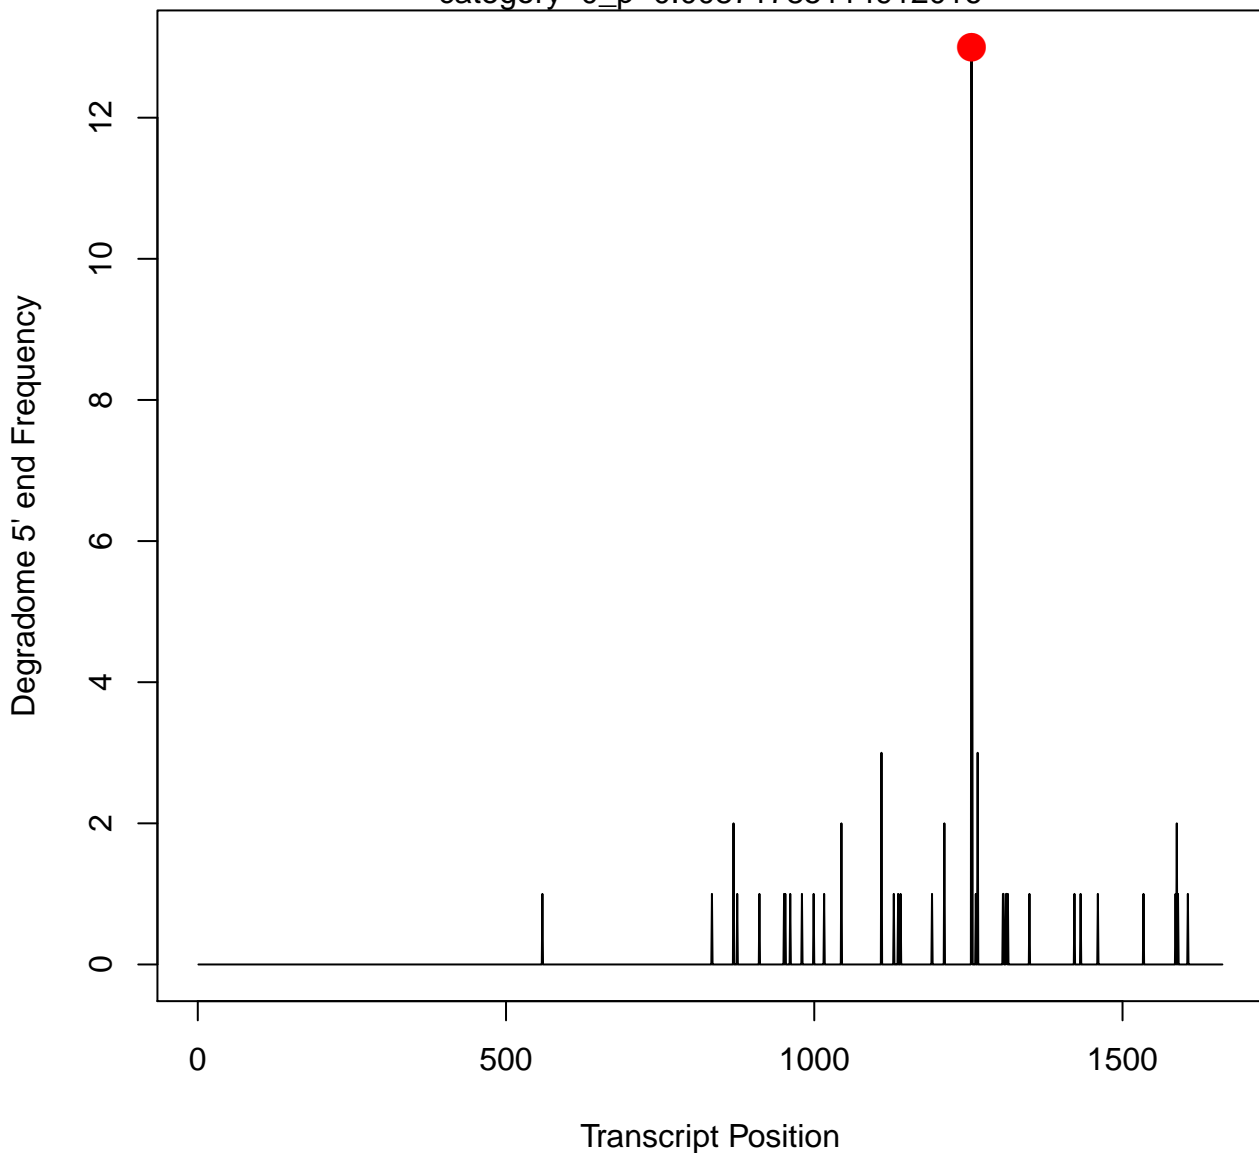

Supplement: s1 [file s1]

**T=Cluster-18410.74441\_Q=novel\_94\_S=203**

category=0\_p=0.0962857870868653

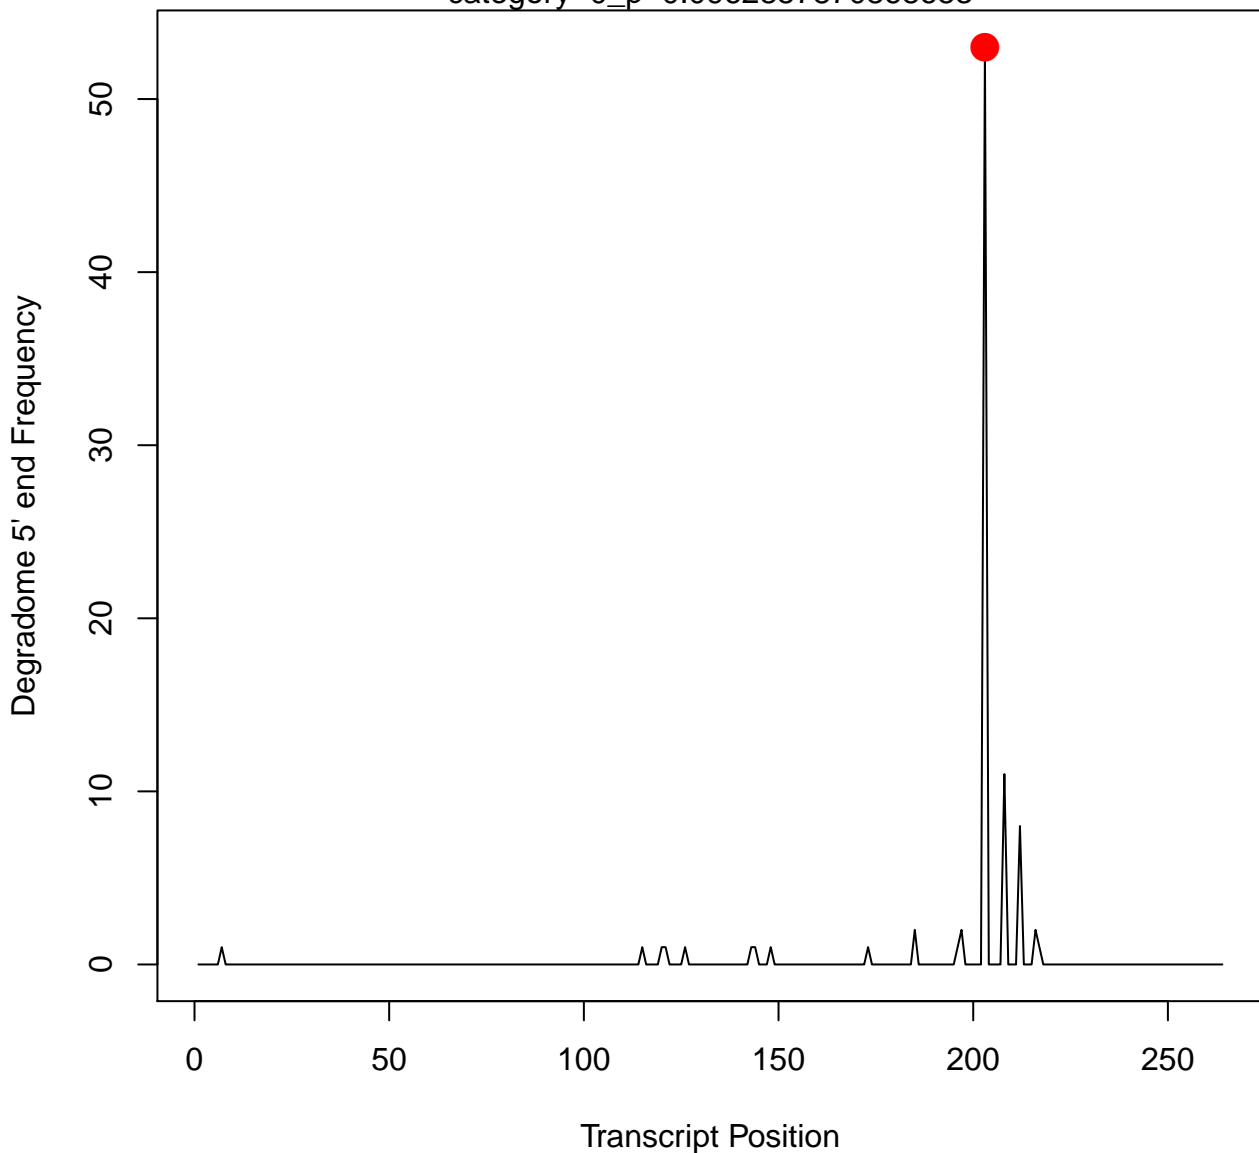

Supplement: s1 [file s1]

**T=Cluster-18410.68792\_Q=novel\_59\_S=544**

category=0\_p=0.00027358987754178

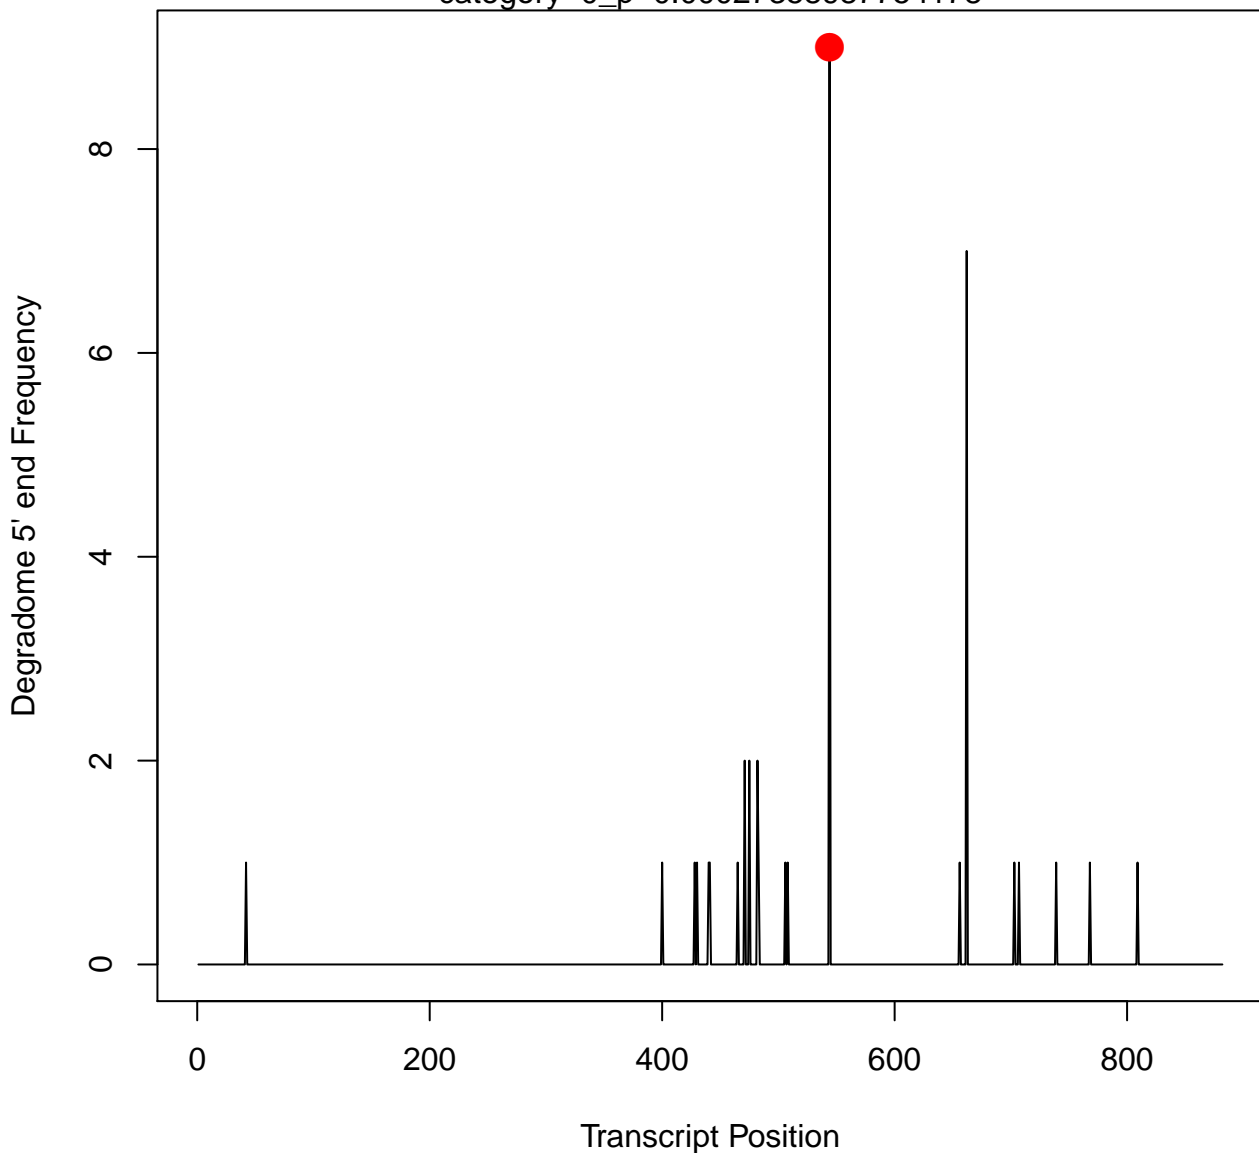

Supplement: s1 [file s1]

**T=Cluster-18410.109049\_Q=novel\_146\_S=929**

category=0\_p=0.00218662432695249

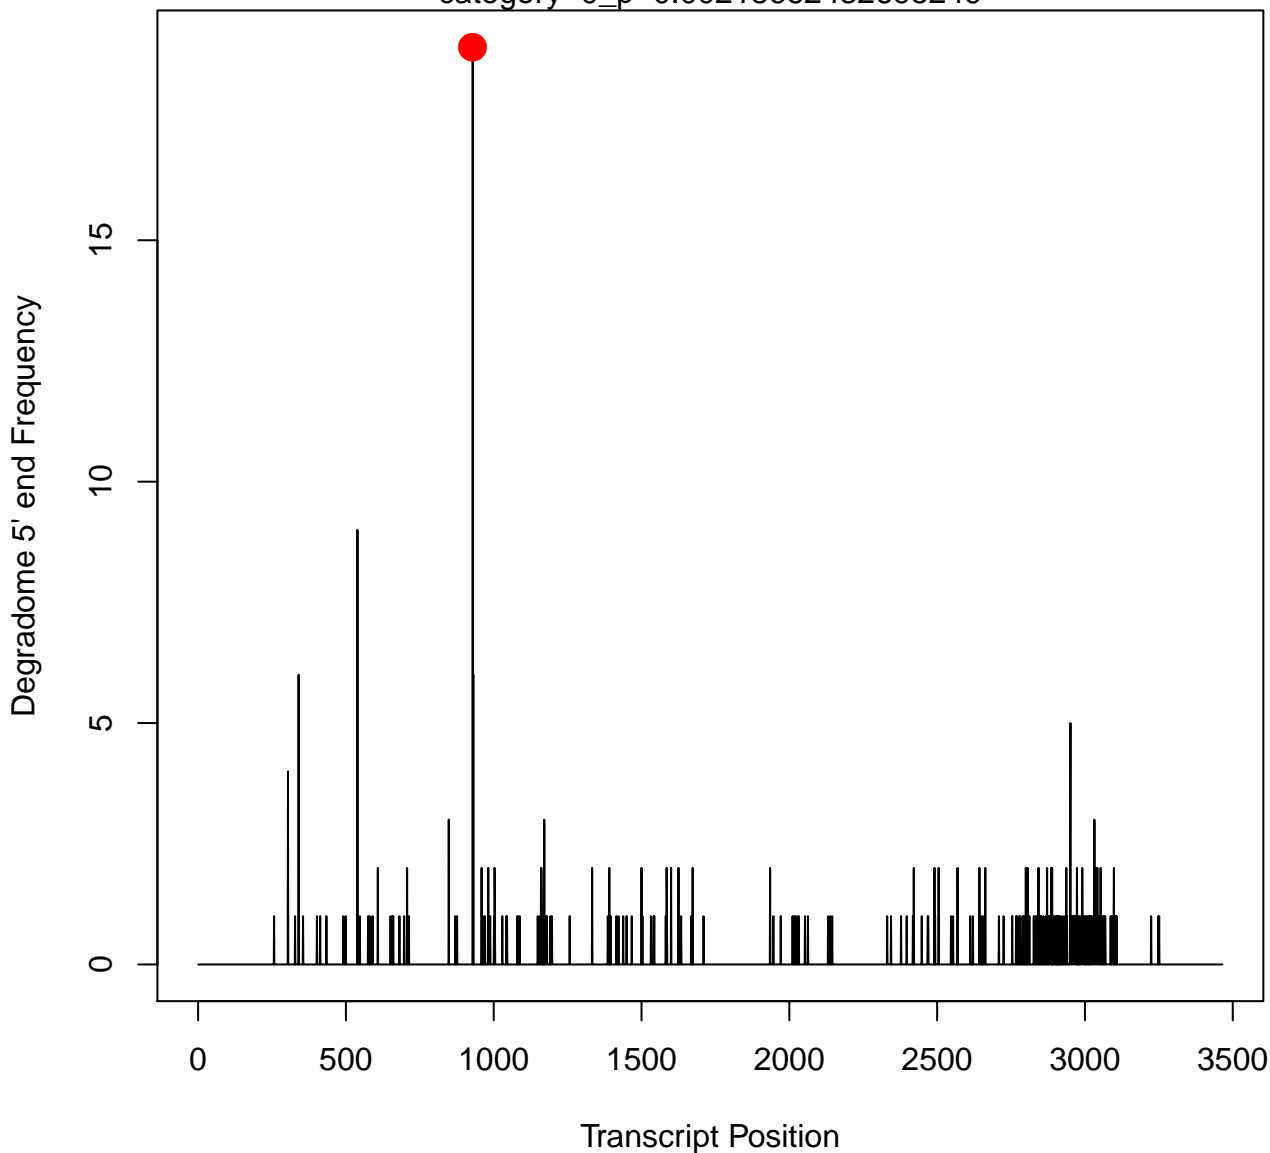

Supplement: s1 [file s1]

**T=Cluster-18410.81188\_Q=pma-miR951\_S=298**

category=0\_p=0.00708906326490744

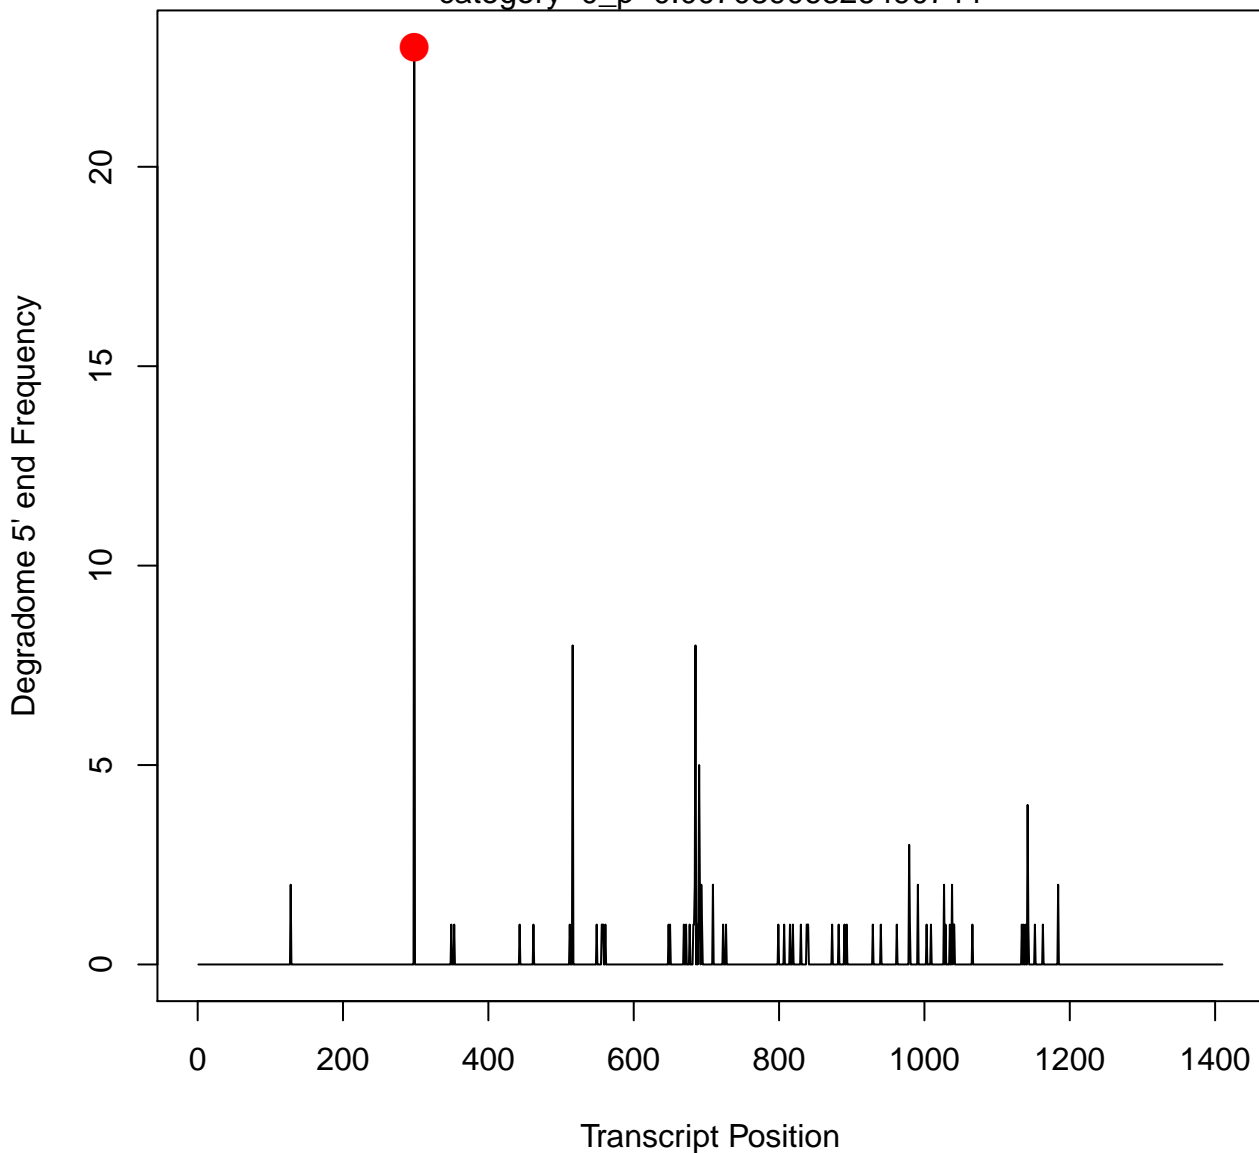

Supplement: s1 [file s1]

**T=Cluster-18410.109050\_Q=novel\_146\_S=929**

category=0\_p=0.00273253291772324

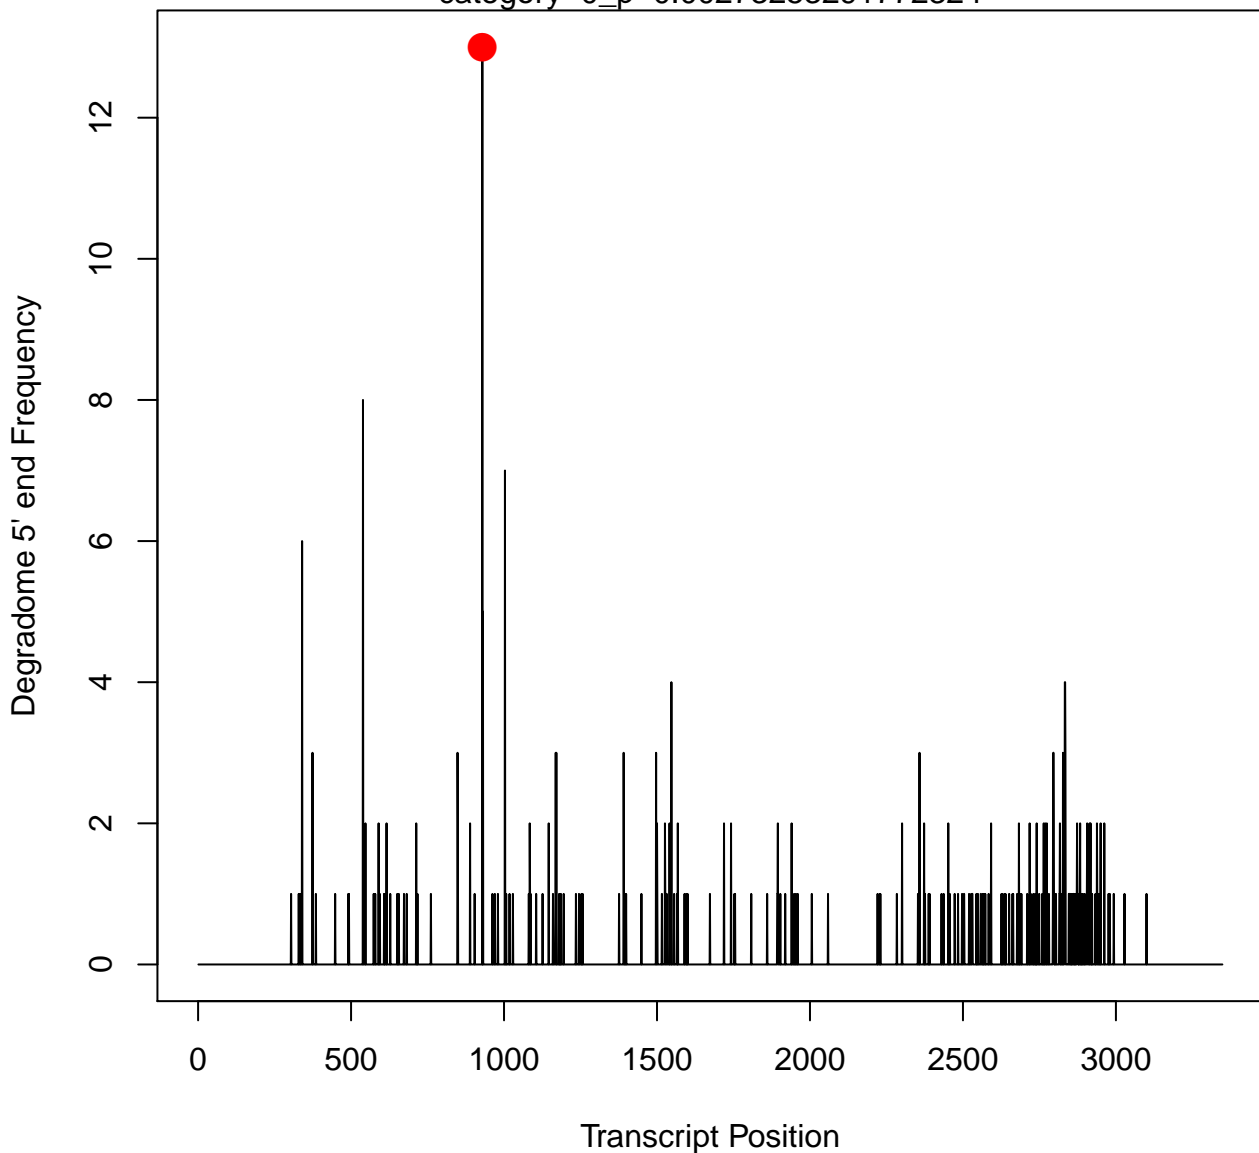

Supplement: s1 [file s1]

**T=Cluster-18410.87002\_Q=novel\_12\_S=53**

category=1\_p=0.00093543193942569

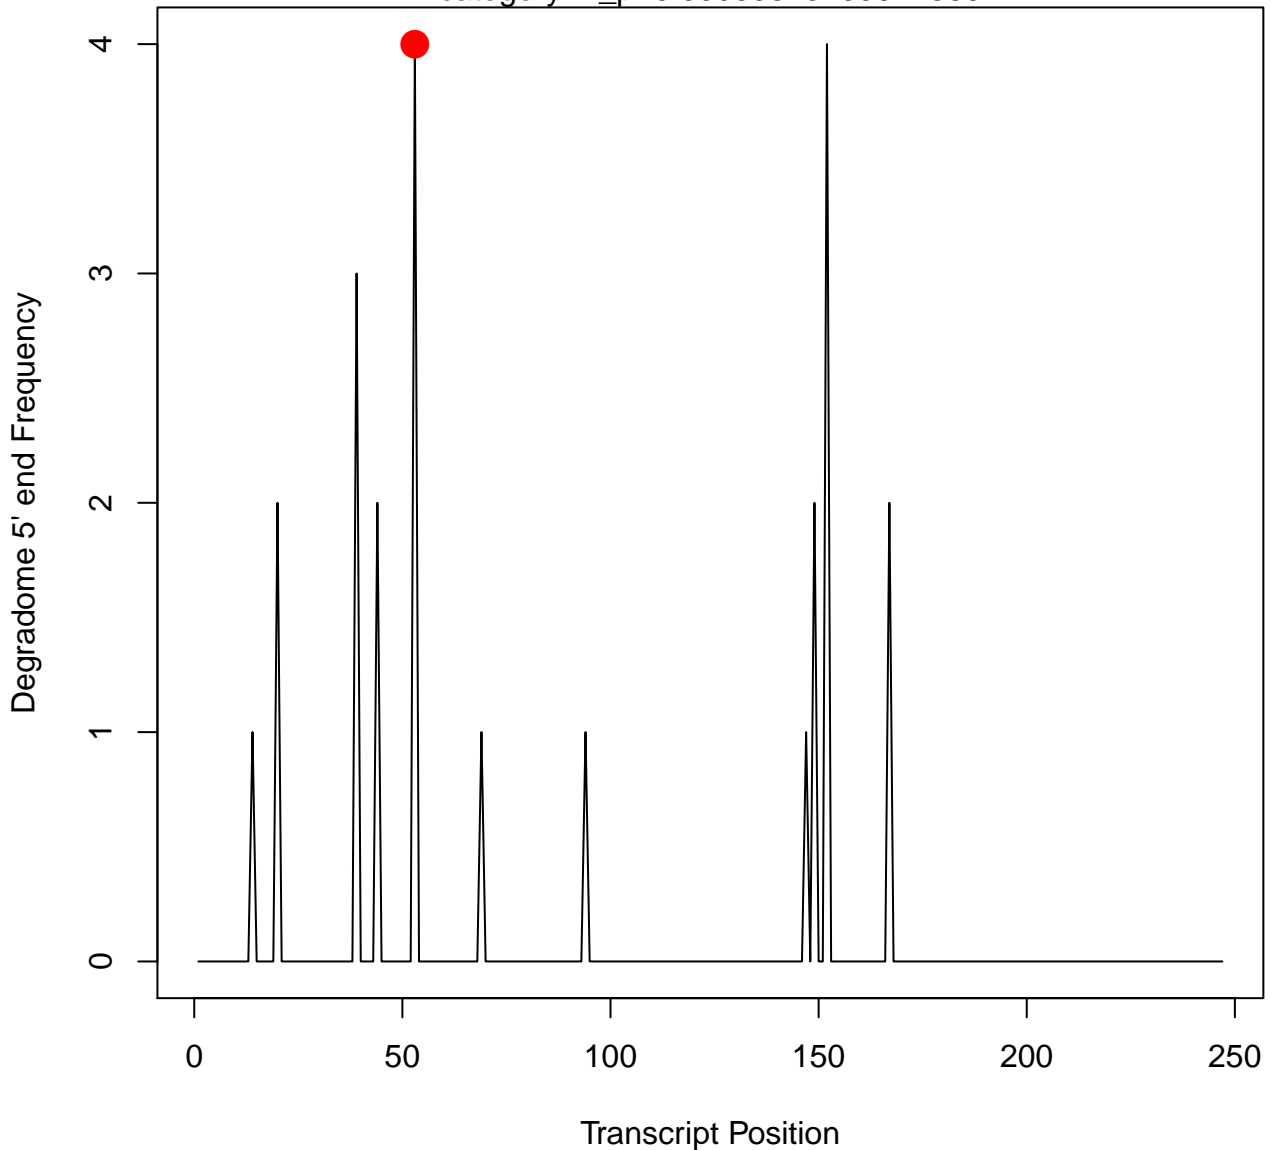

Supplement: s1 [file s1]

**T=Cluster-18410.49891\_Q=novel\_42\_S=365**

category=0\_p=0.0040959980740275

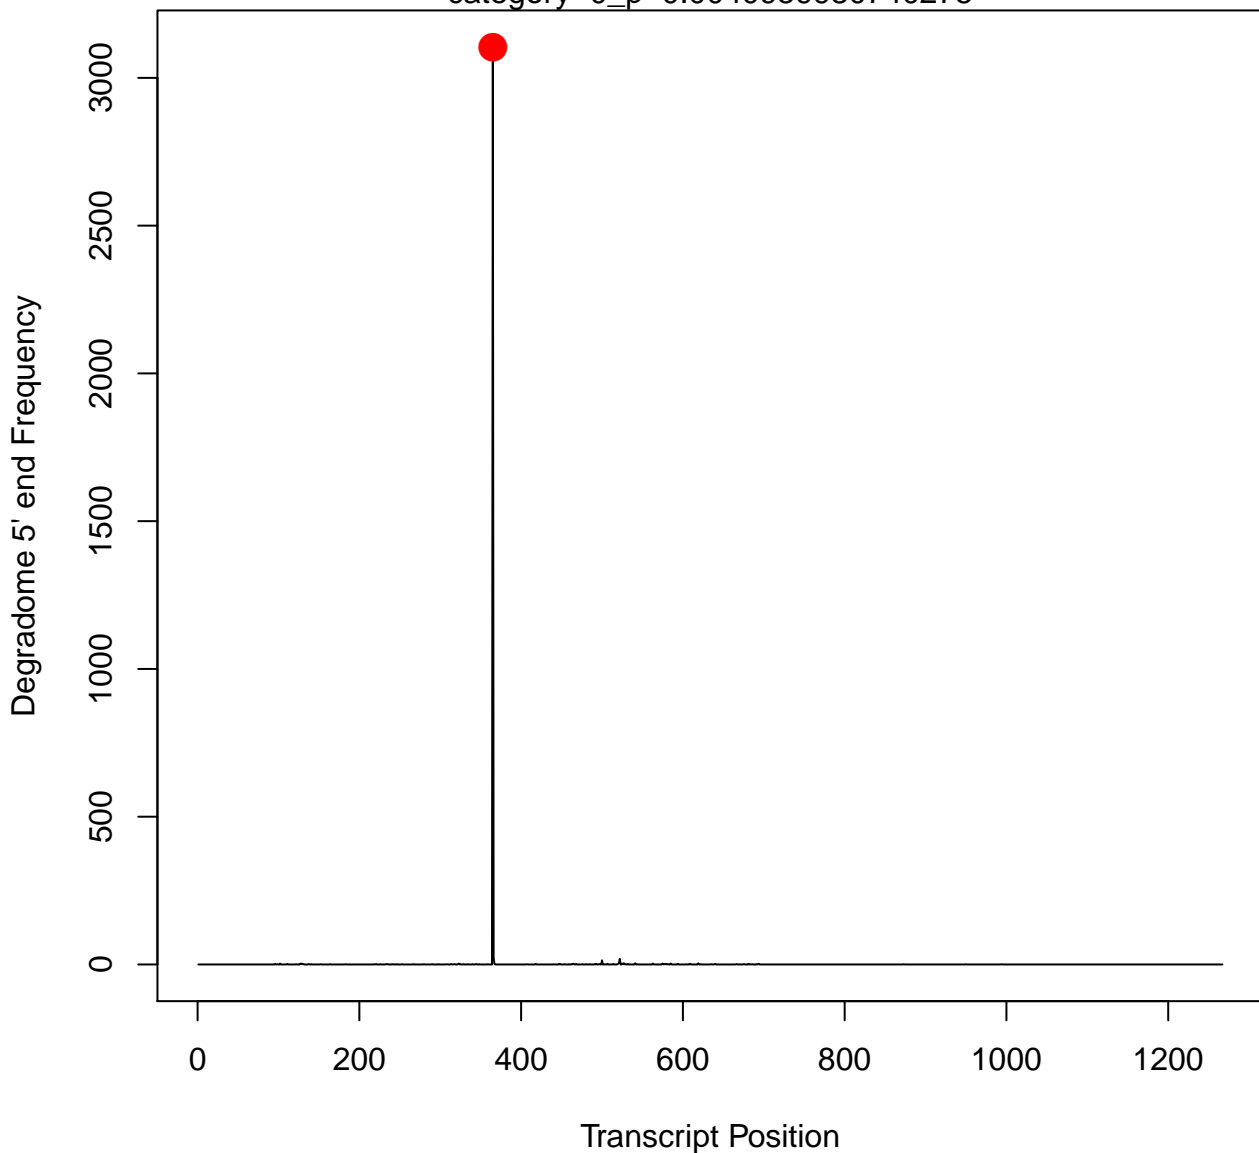

Supplement: s1 [file s1]

**T=Cluster-18410.35911\_Q=pma-miR482a\_S=104**

category=0\_p=0.00245961596621247

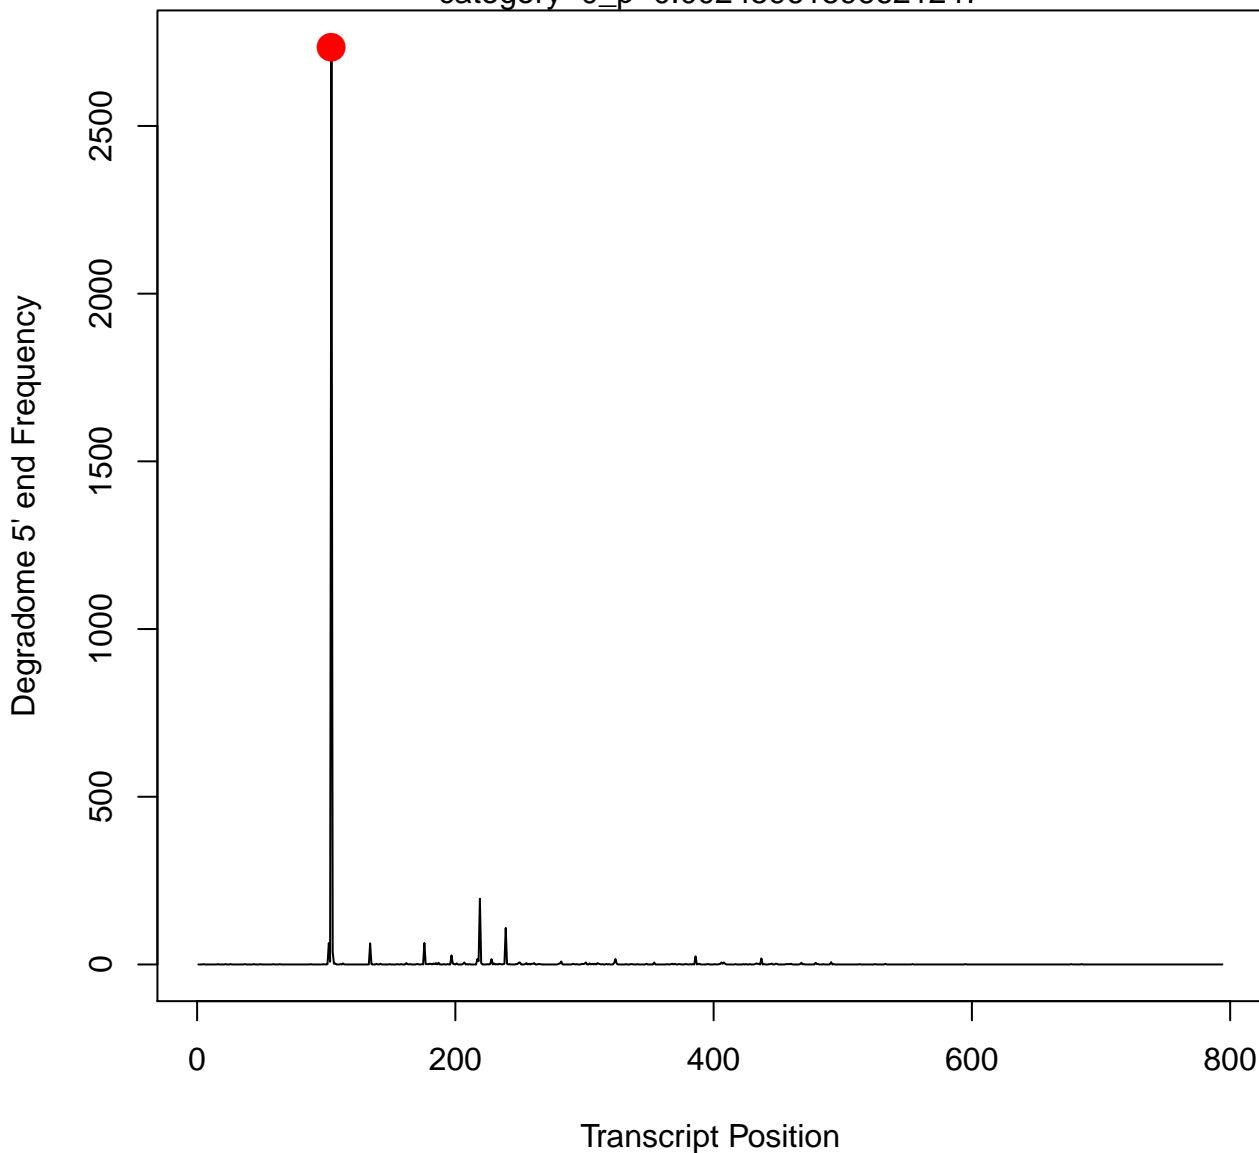

Supplement: s1 [file s1]

**T=Cluster-18410.56979\_Q=novel\_47\_S=348**

category=0\_p=0.0211167816003845

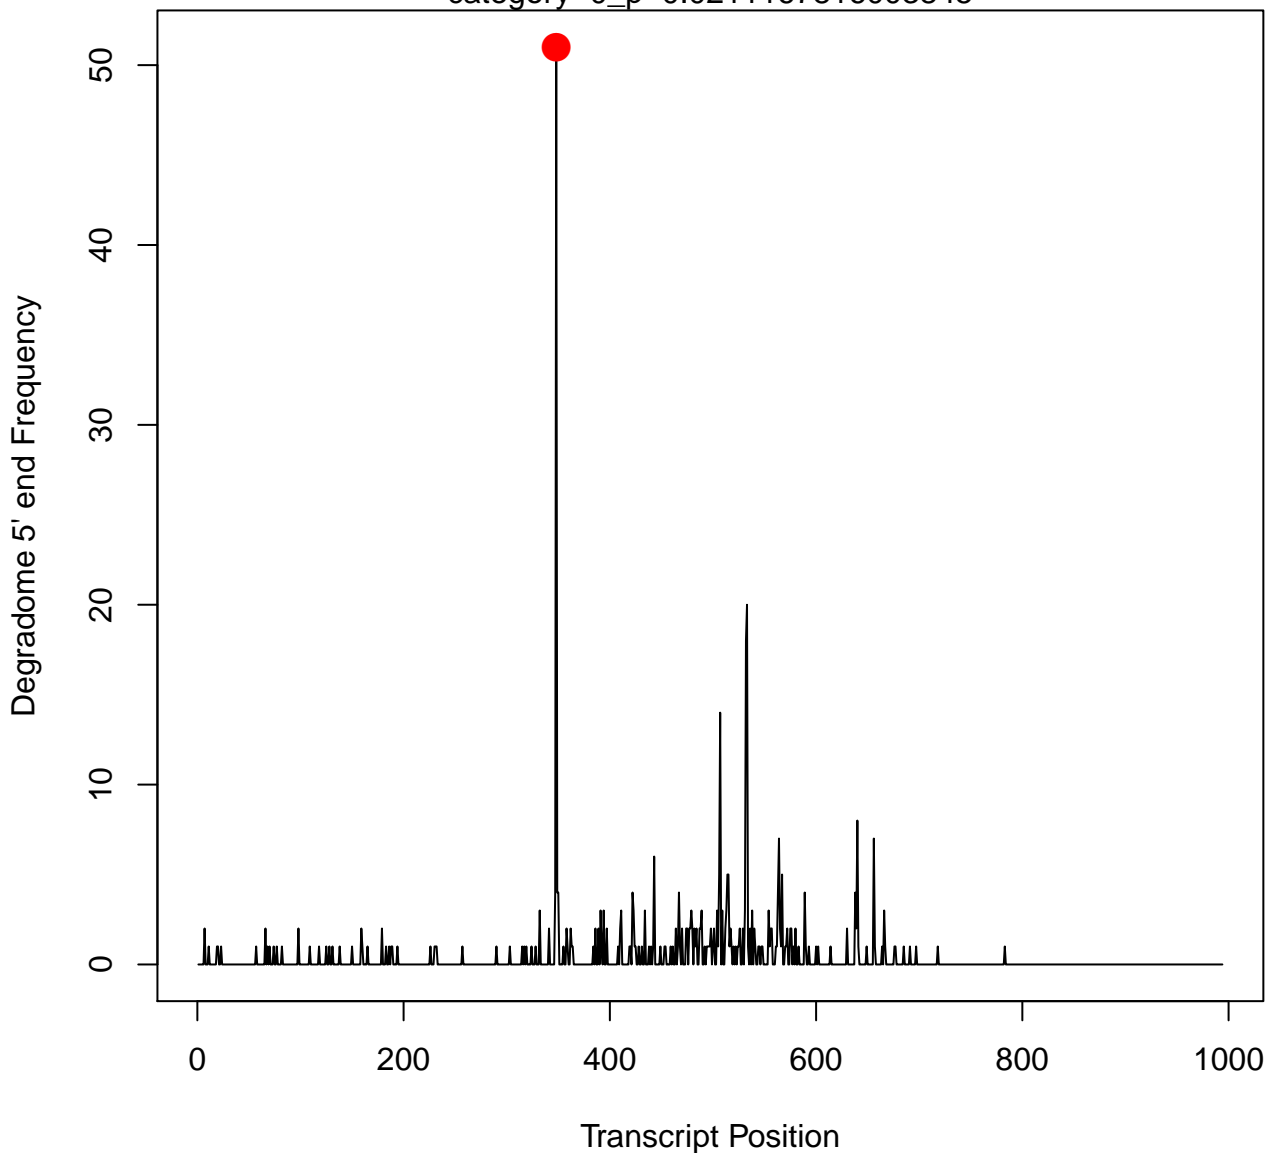

Supplement: s1 [file s1]

**T=Cluster-18410.72936\_Q=novel\_2\_S=1419**

category=3\_p=0.0831820937889345

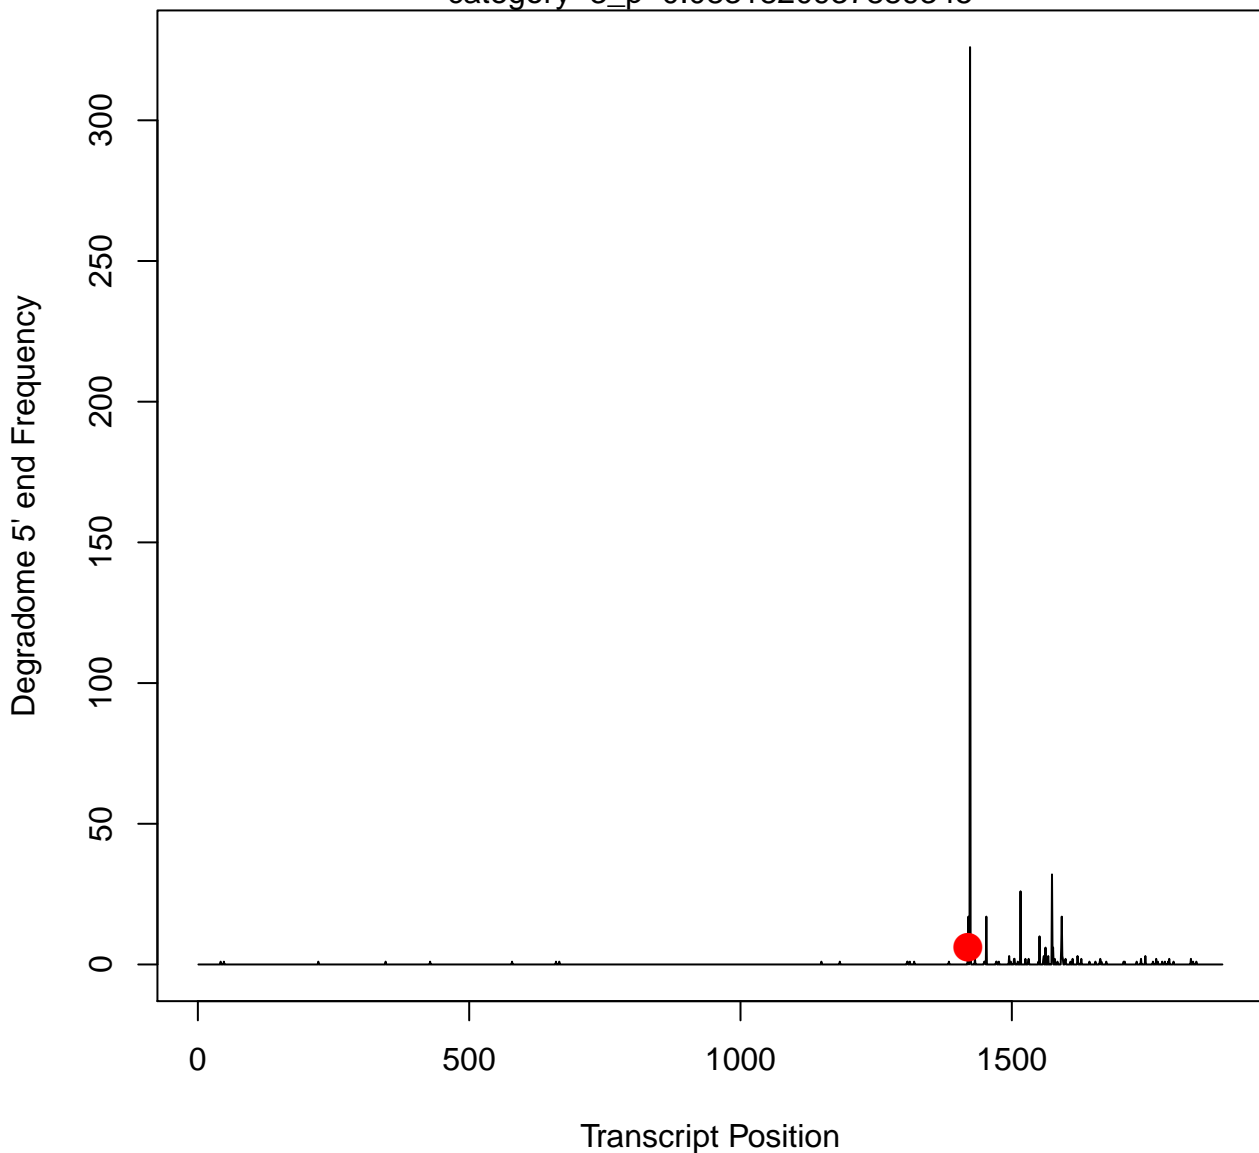

Supplement: s1 [file s1]

**T=Cluster-18410.108655\_Q=novel\_114\_S=1408**

category=1\_p=0.00373648083359202

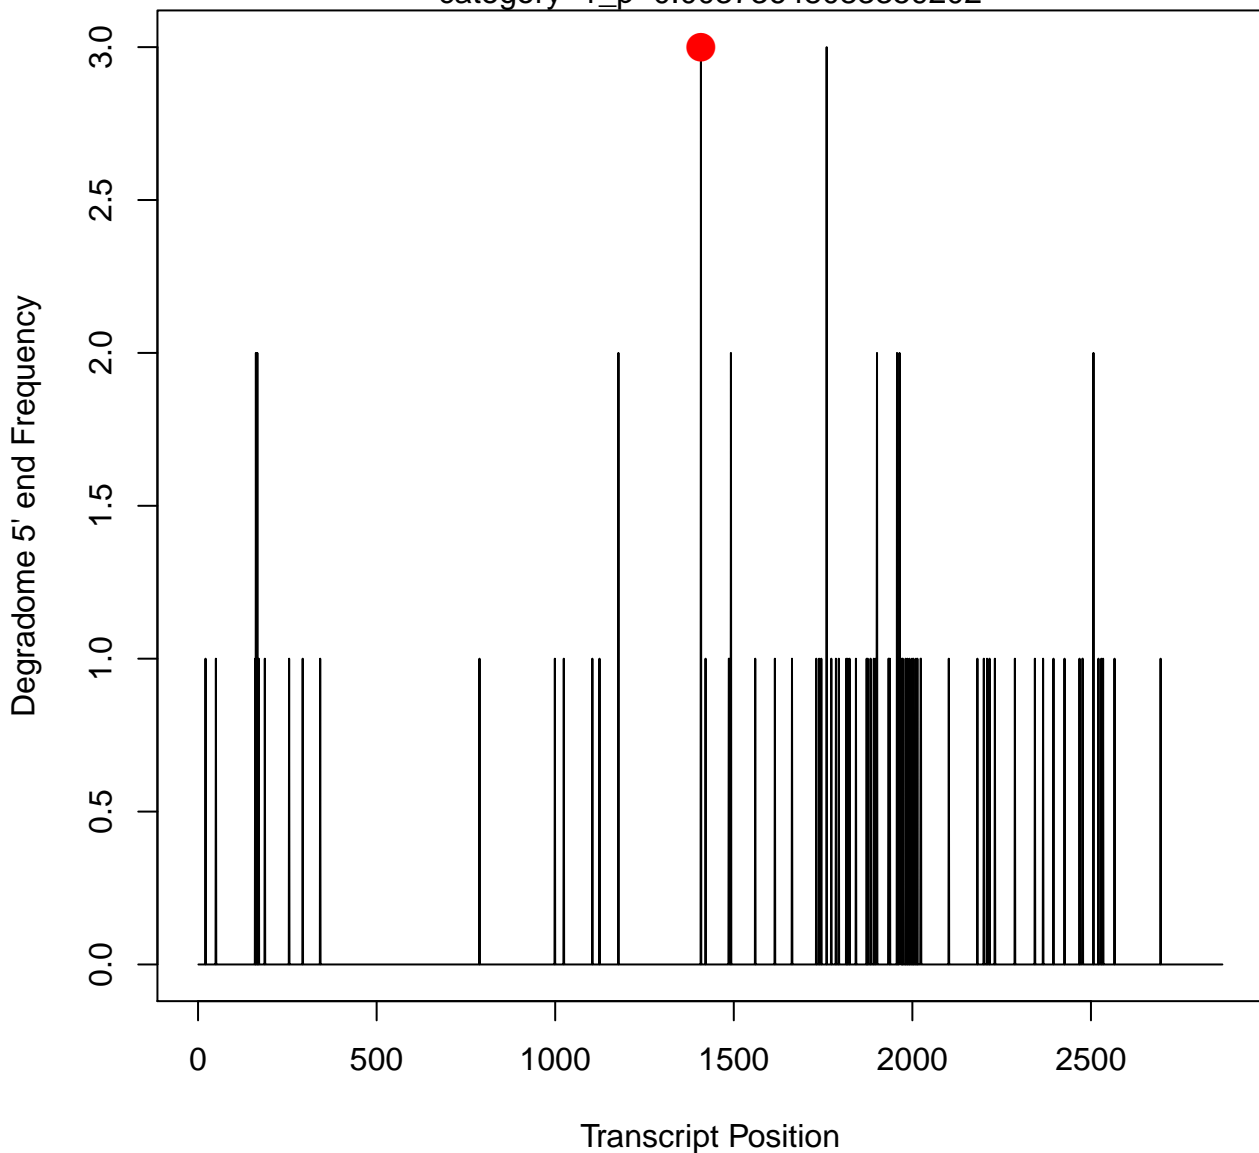

Supplement: s1 [file s1]

**T=Cluster-18410.32230\_Q=novel\_197\_S=234**

category=0\_p=0.00572969583297245

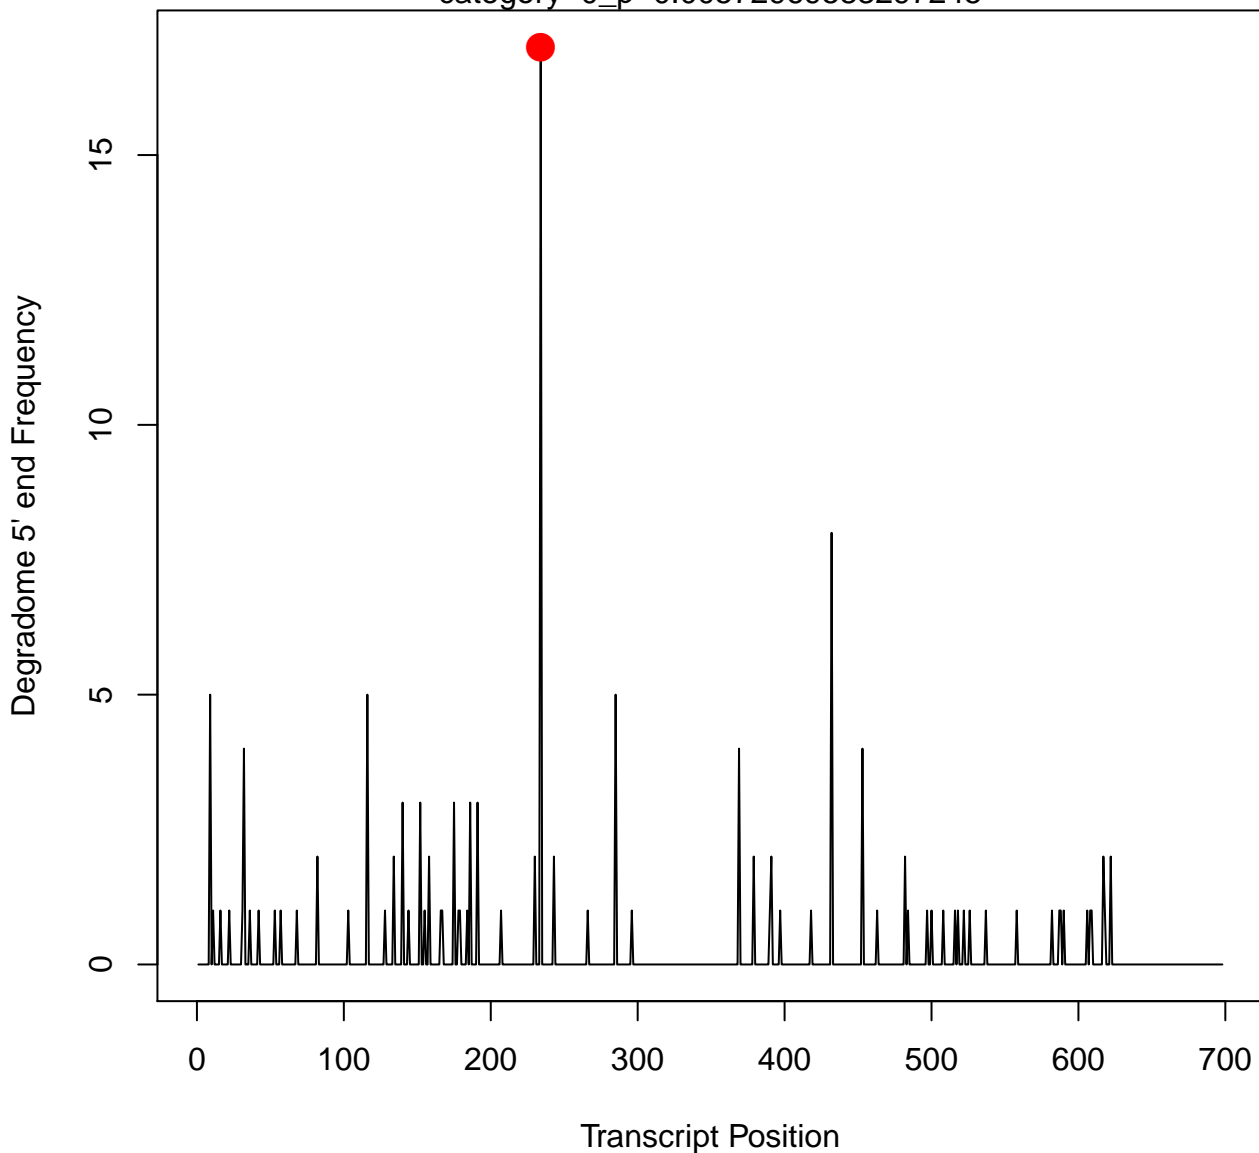

Supplement: s1 [file s1]

**T=Cluster-18410.87929\_Q=novel\_12\_S=82**

category=0\_p=0.00545759909929999

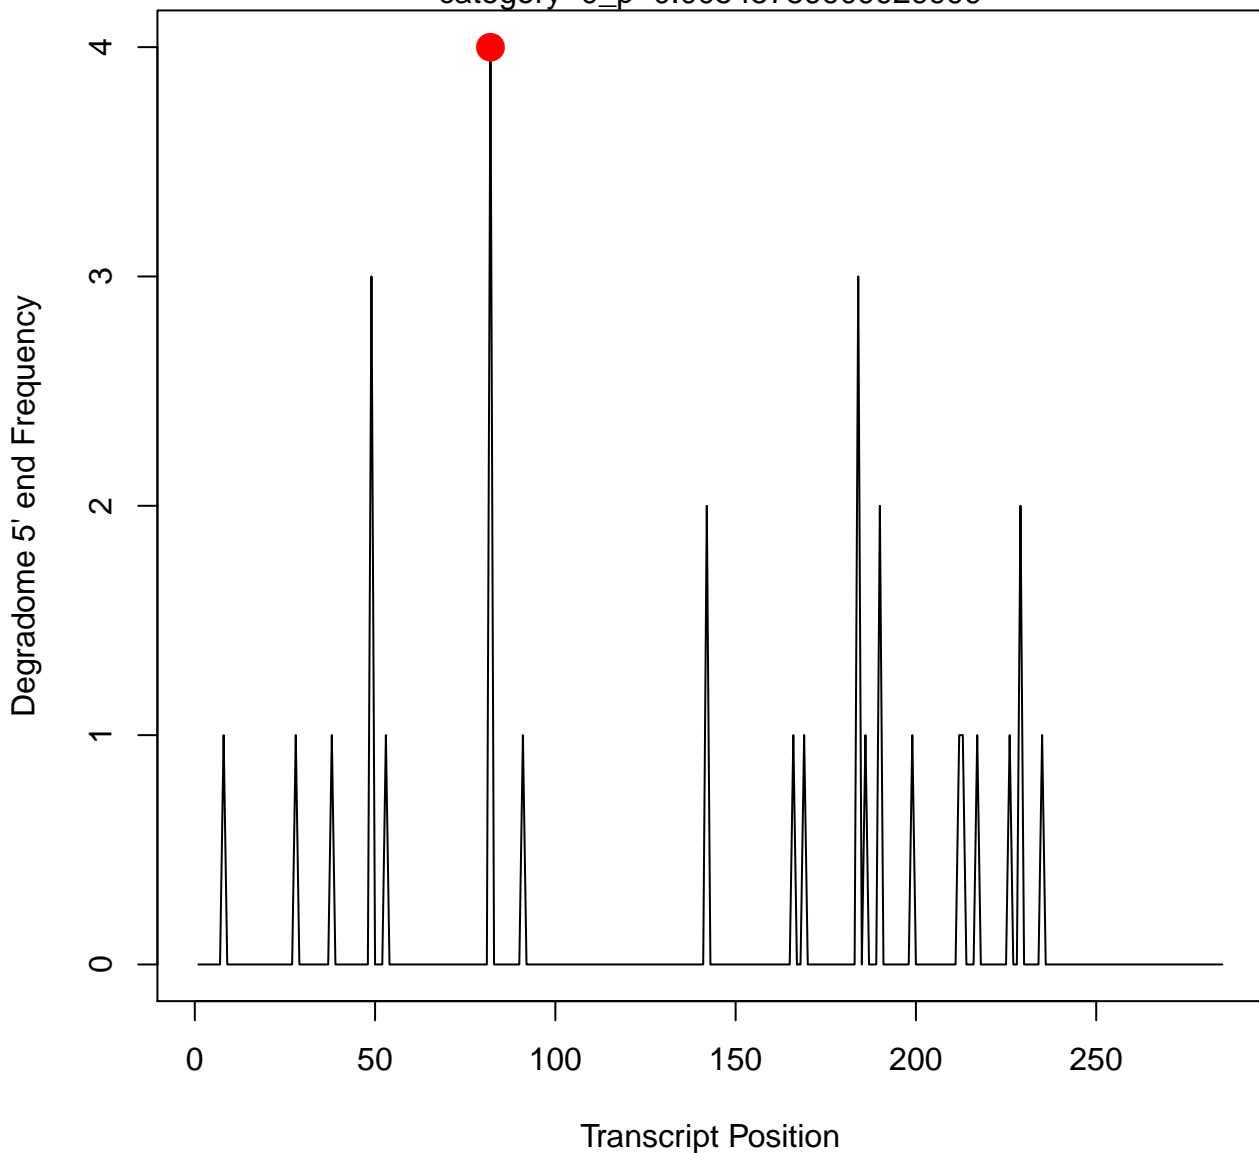

Supplement: s1 [file s1]

**T=Cluster-18410.85742\_Q=novel\_16\_S=827**

category=0\_p=0.000820545098840553

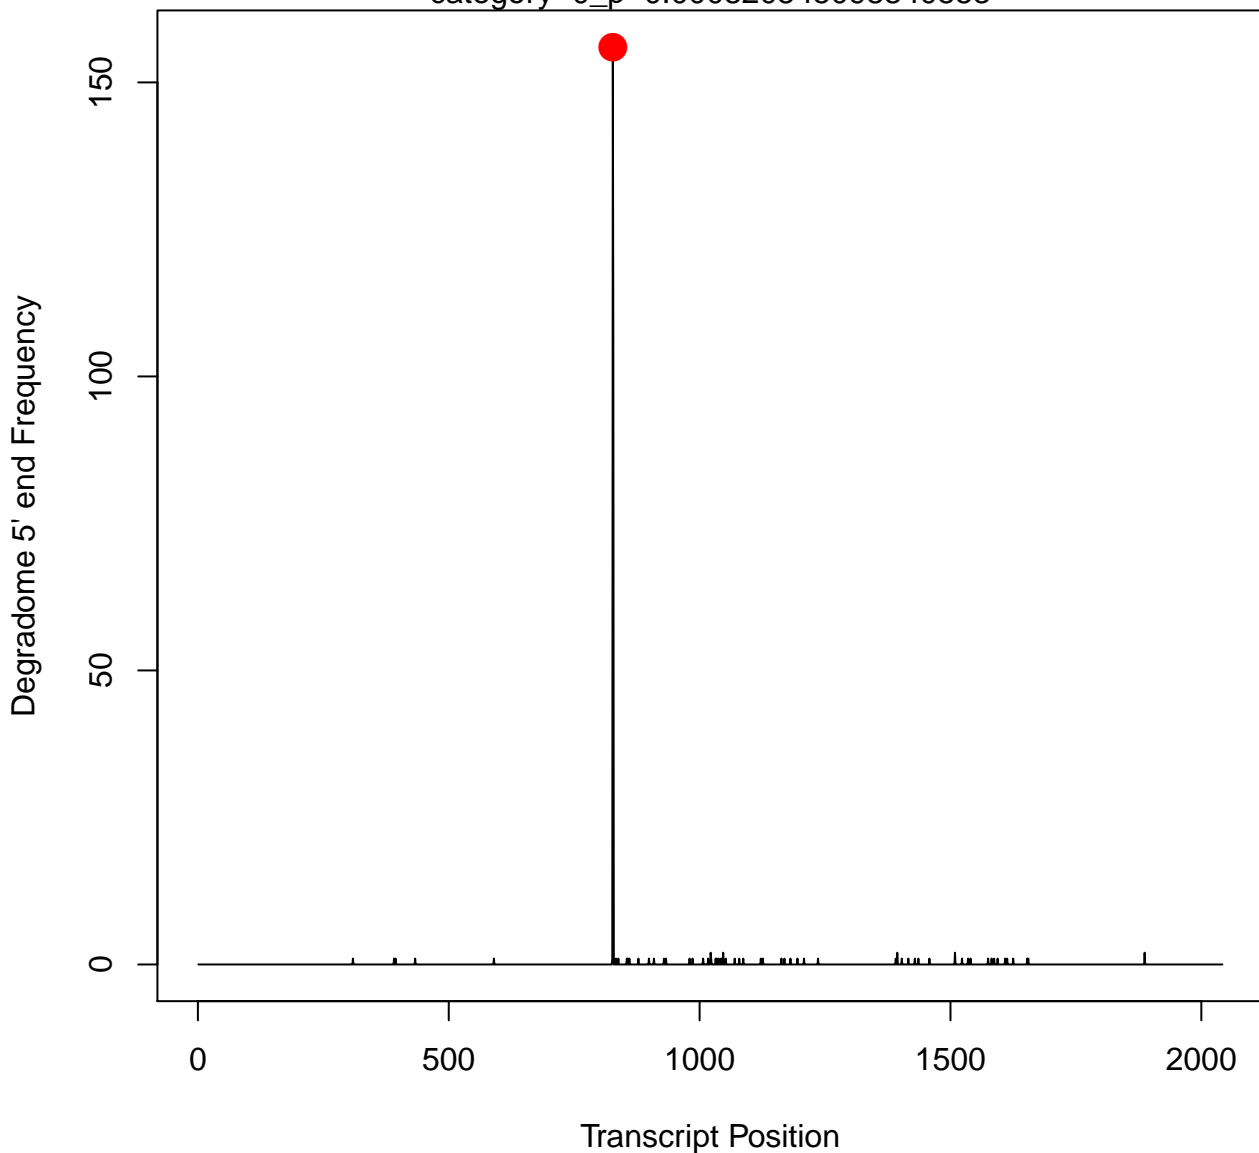

Supplement: s1 [file s1]

**T=Cluster-18410.32168\_Q=pma-miR319\_S=375**

category=0\_p=0.0100731331718849

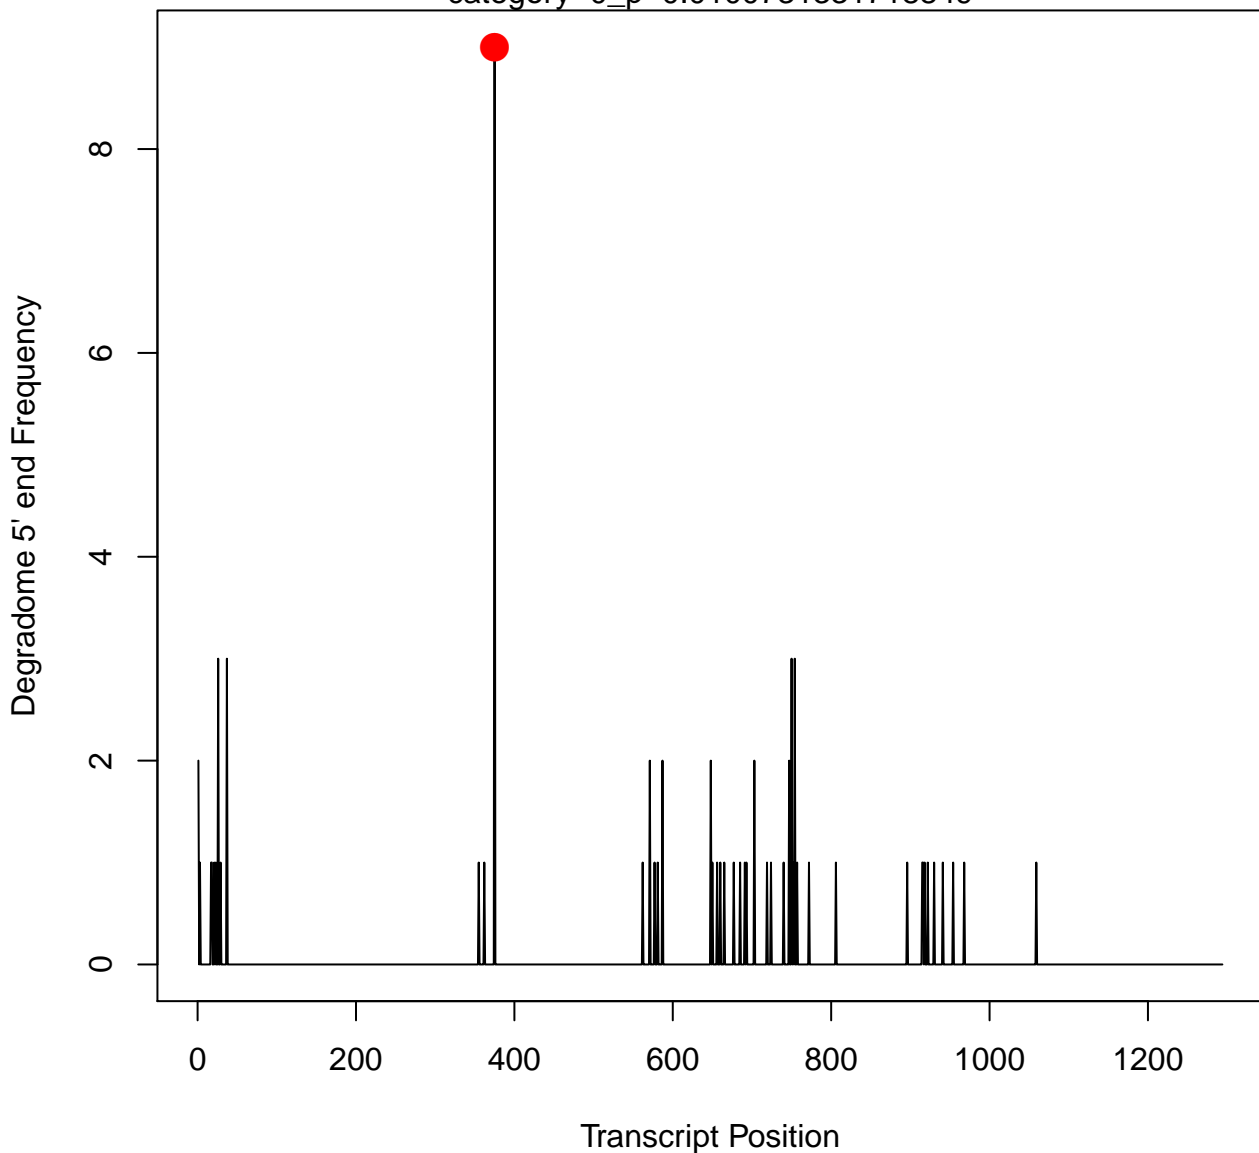

Supplement: s1 [file s1]

**T=Cluster-18410.75677\_Q=pma-miR946a-3p\_S=955**

category=0\_p=0.0135882009795663

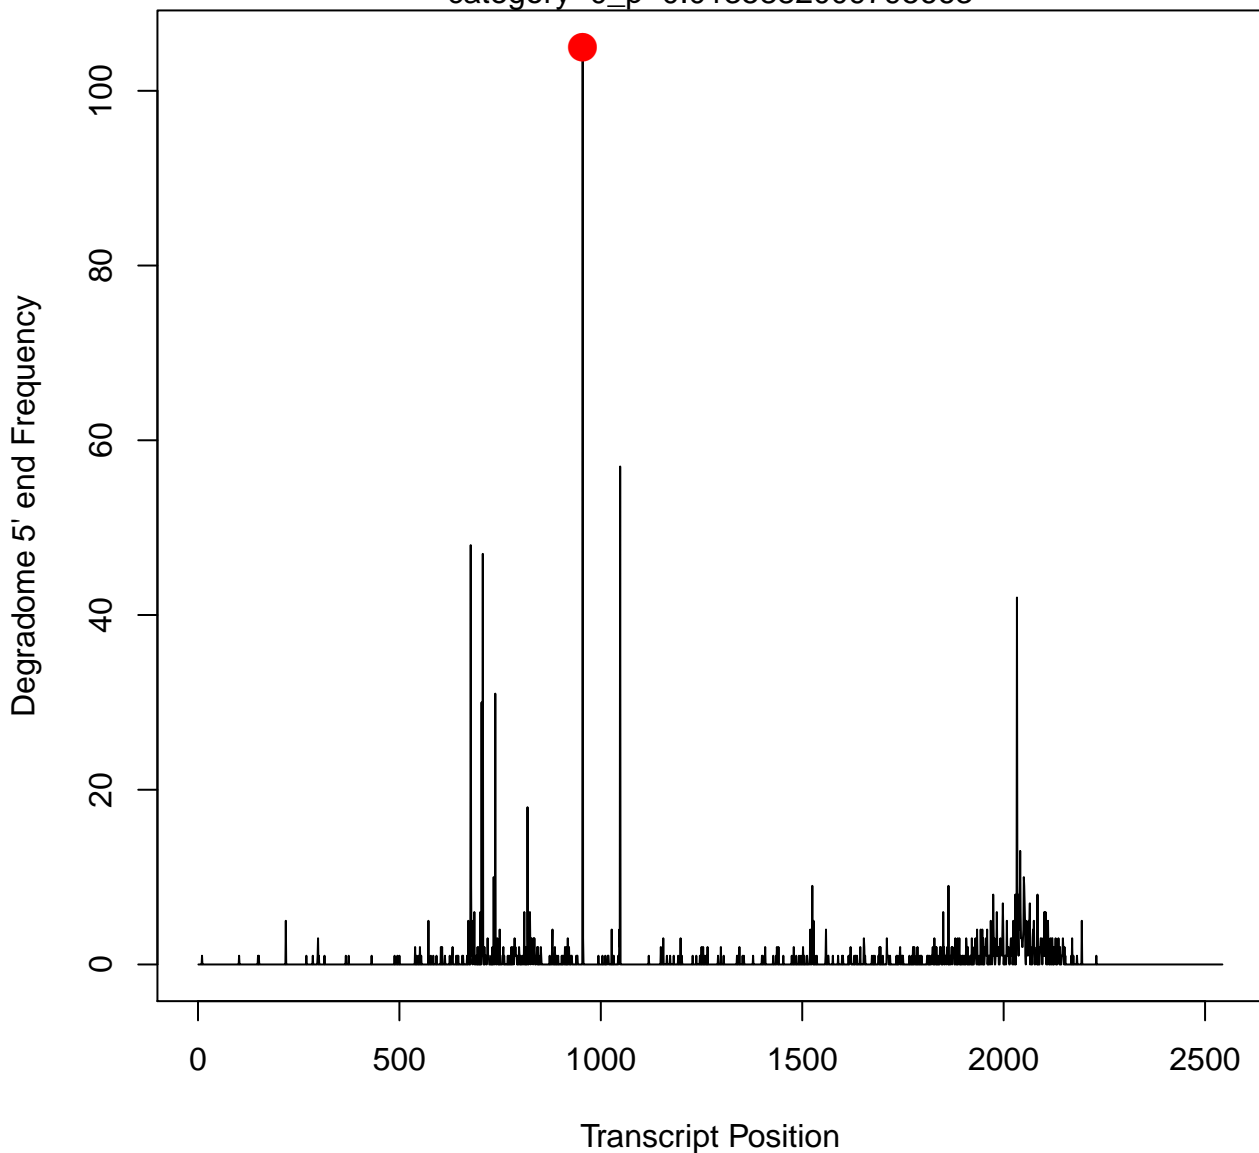

Supplement: s1 [file s1]

**T=Cluster-18410.34688\_Q=novel\_16\_S=166**

category=0\_p=0.0127781409216312

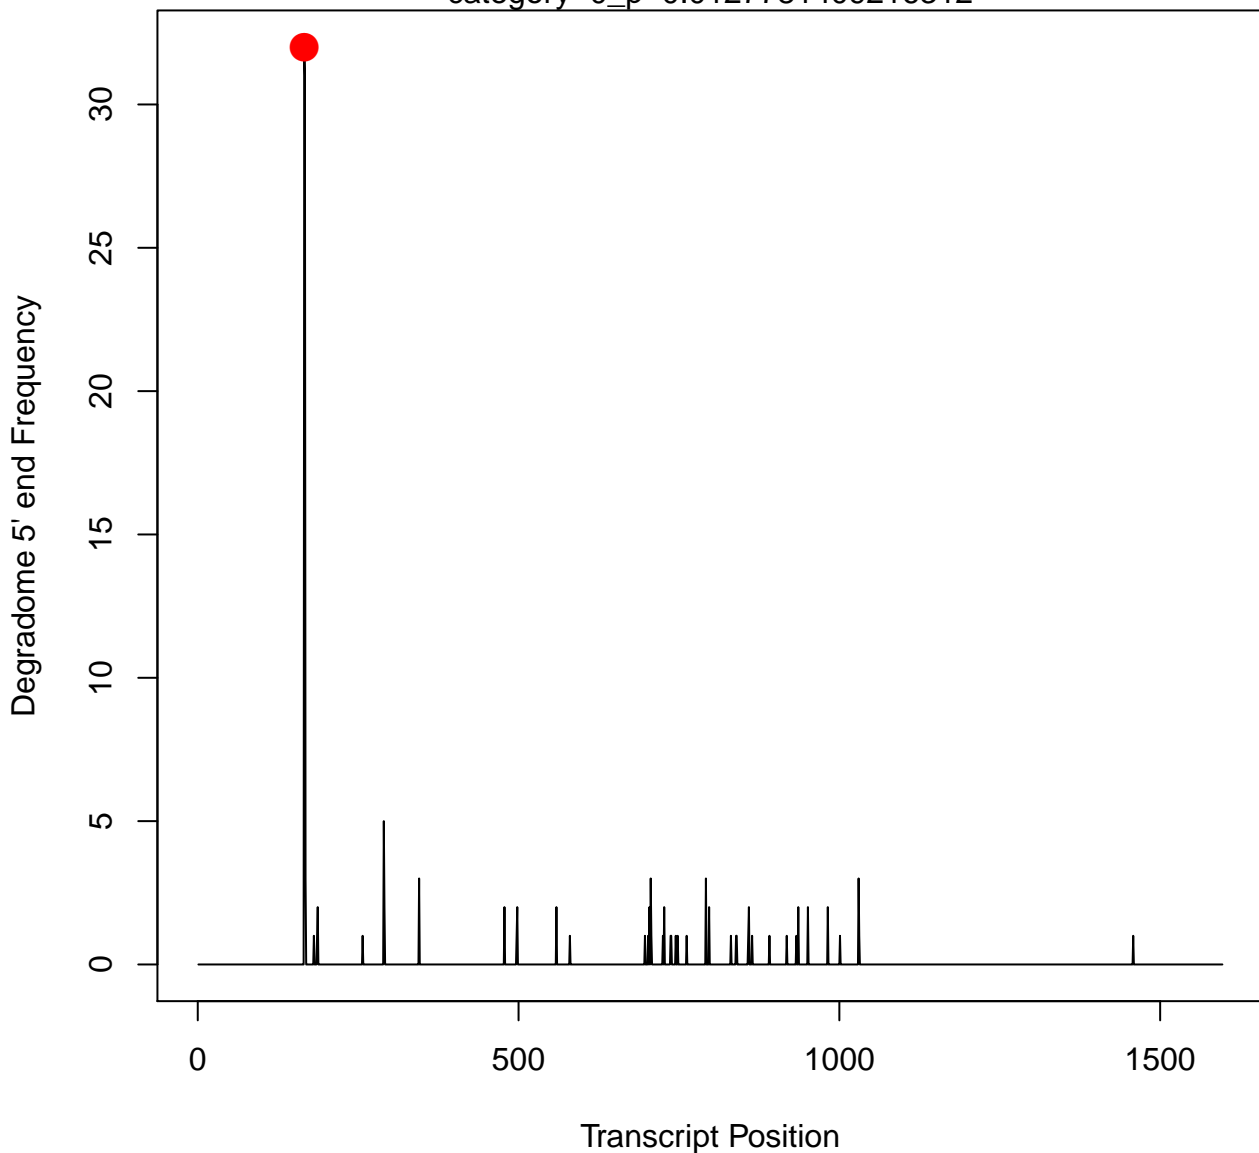

Supplement: s1 [file s1]

**T=Cluster-18410.117480\_Q=pma-miR390\_S=230**

category=2\_p=0.0115490438418195

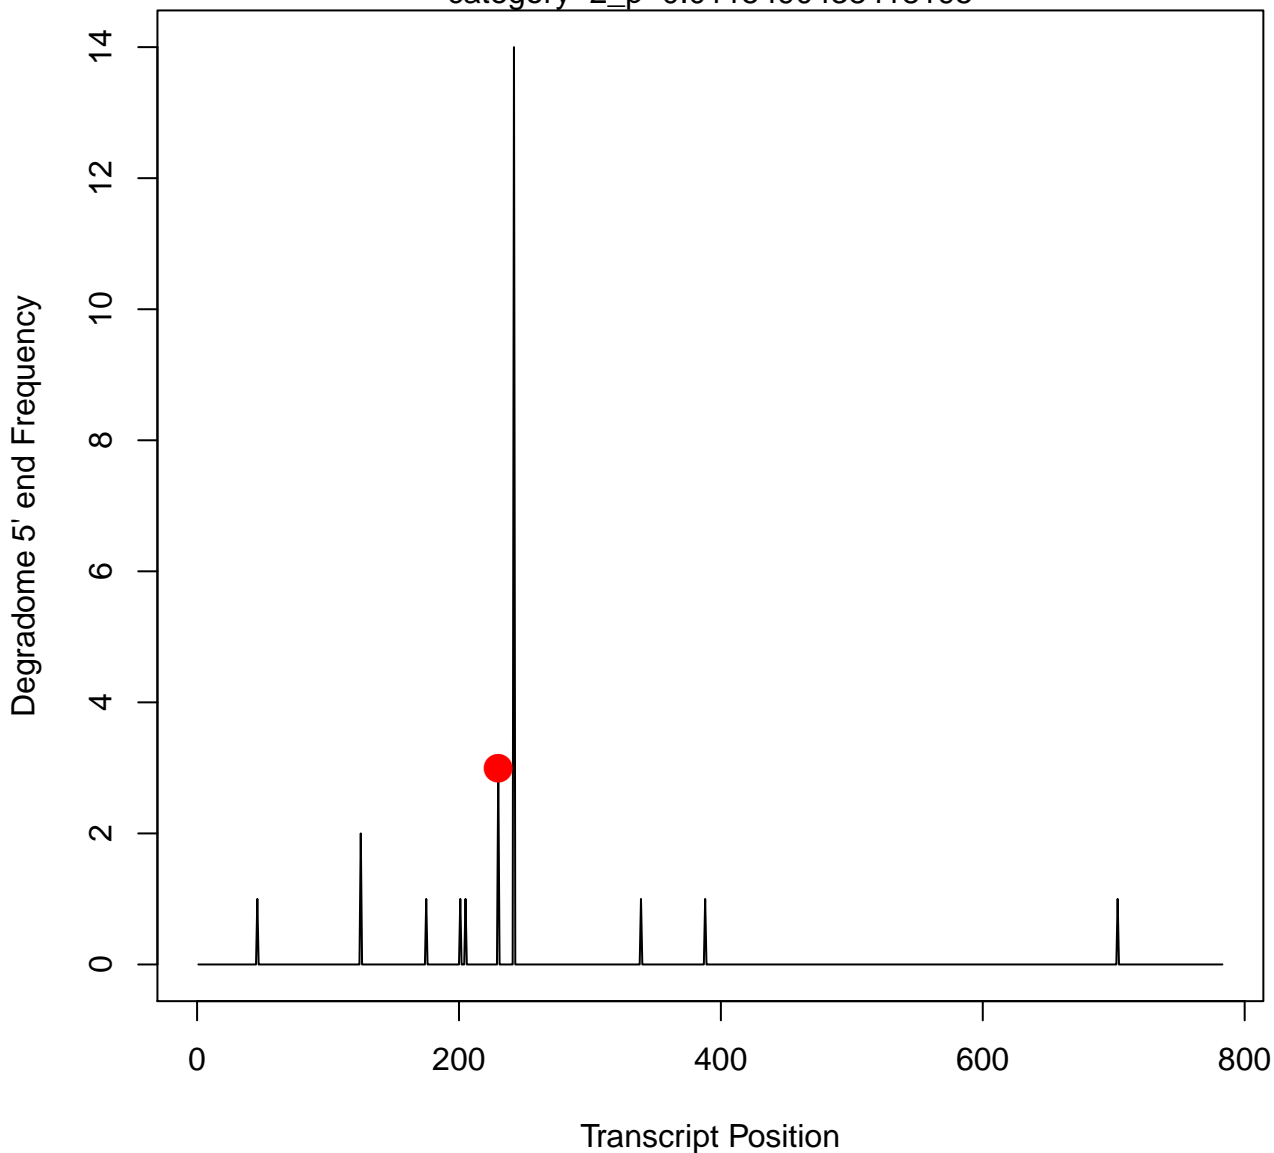

Supplement: s1 [file s1]

**T=Cluster-18410.112670\_Q=novel\_114\_S=806**

category=0\_p=0.00109391048354923

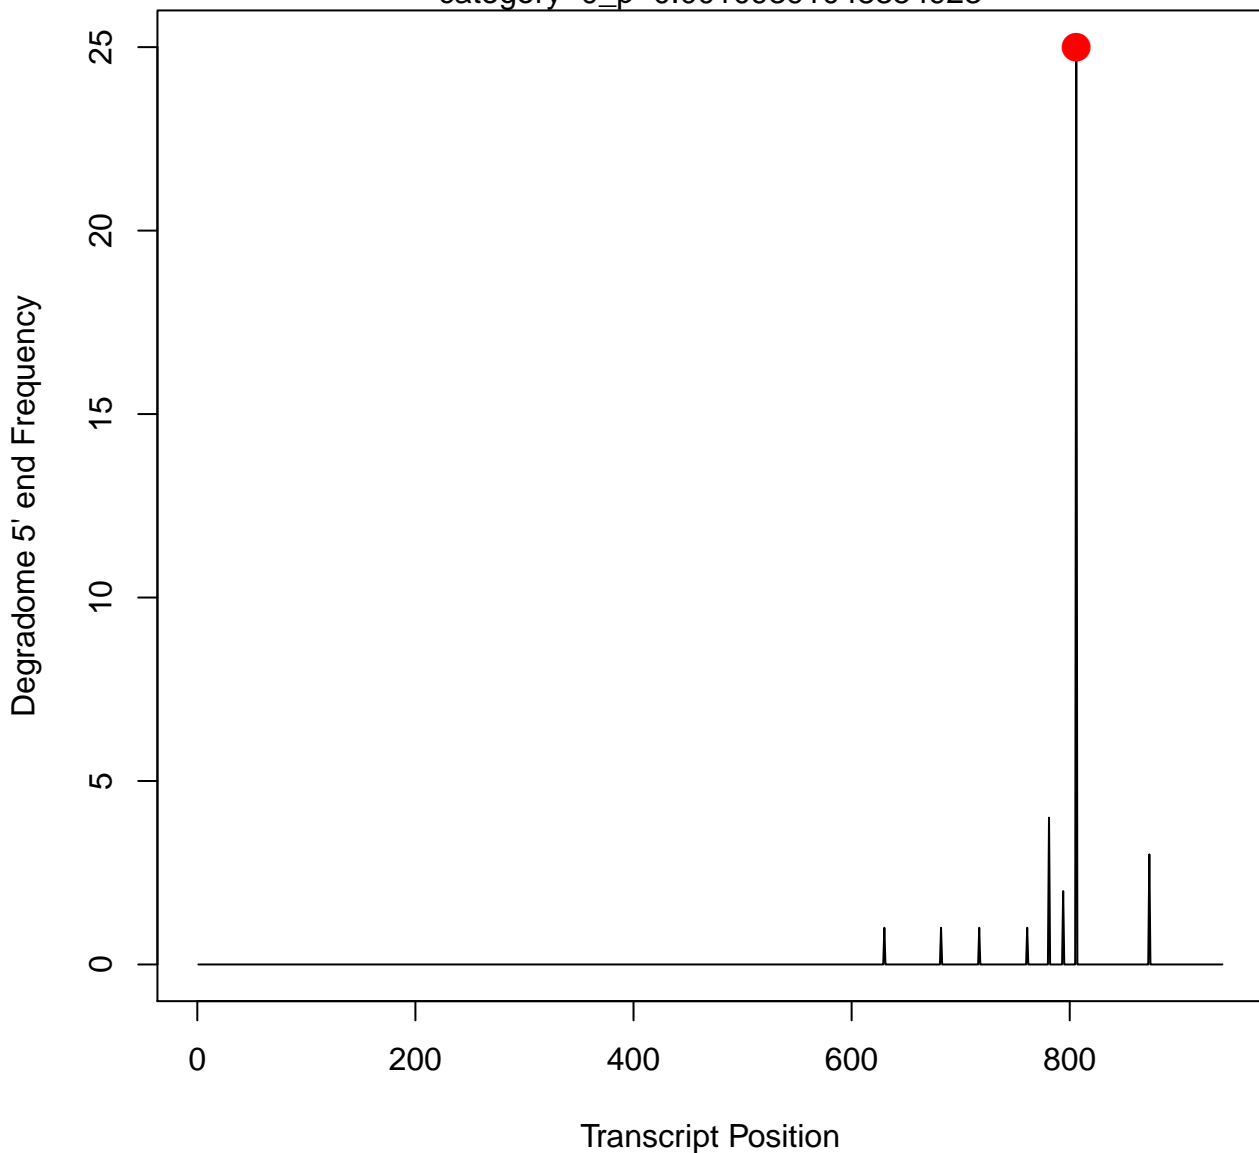

Supplement: s1 [file s1]

**T=Cluster-18410.58490\_Q=novel\_189\_S=897**

category=2\_p=0.0564267304887326

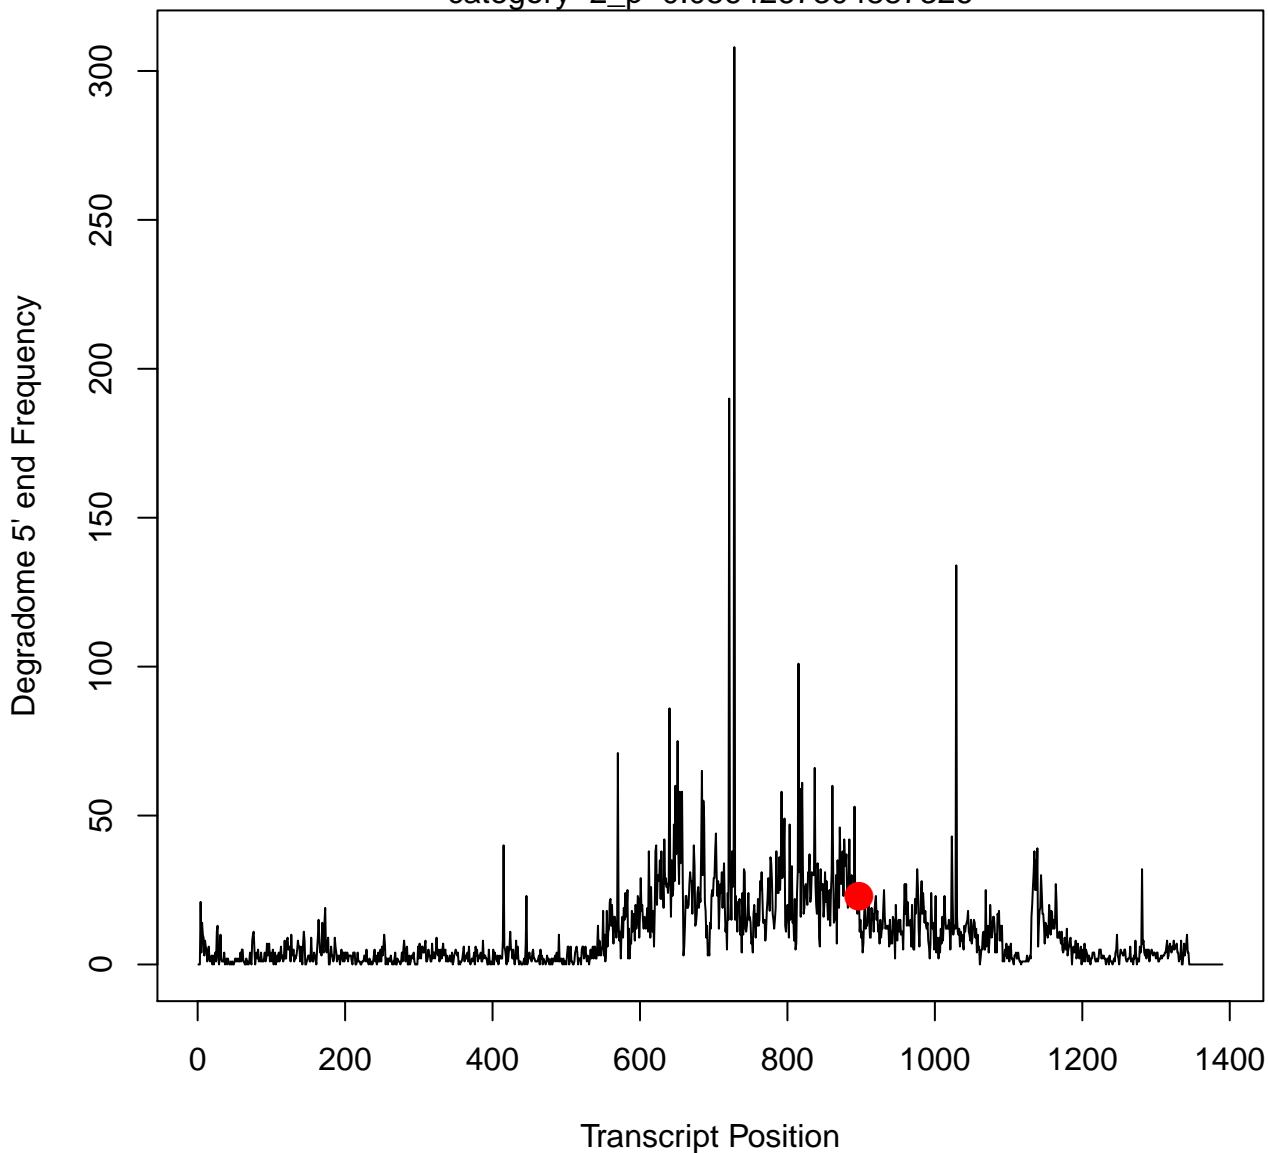

Supplement: s1 [file s1]

**T=Cluster-18410.32683\_Q=novel\_28\_S=329**

category=0\_p=0.0162836036908203

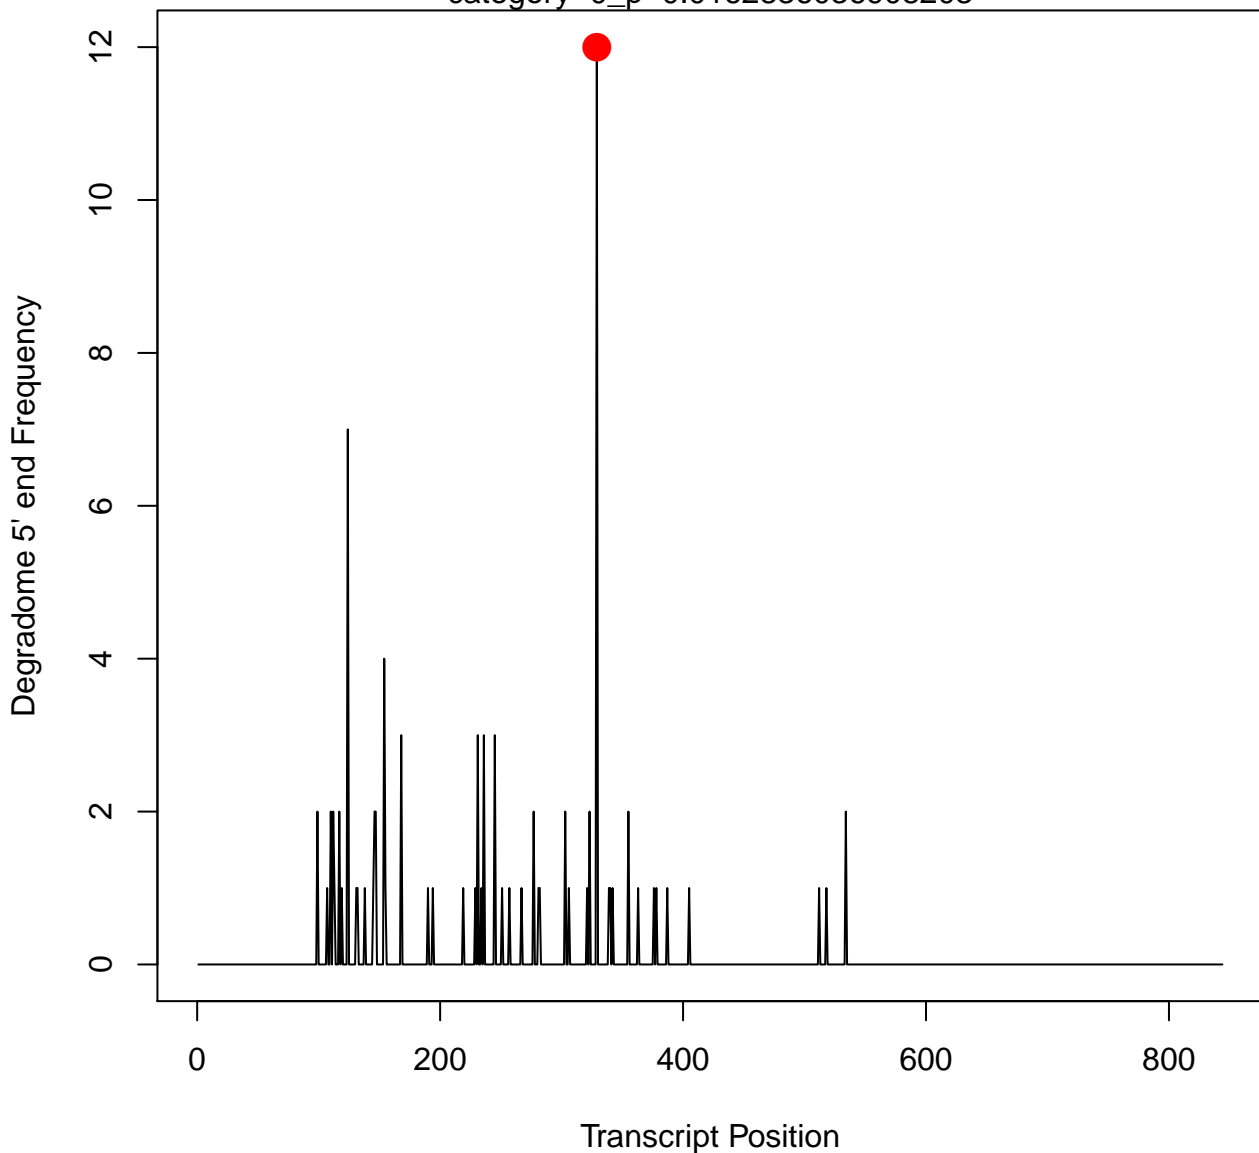

Supplement: s1 [file s1]

**T=Cluster-18410.49063\_Q=novel\_35\_S=278**

category=0\_p=0.0627916590145059

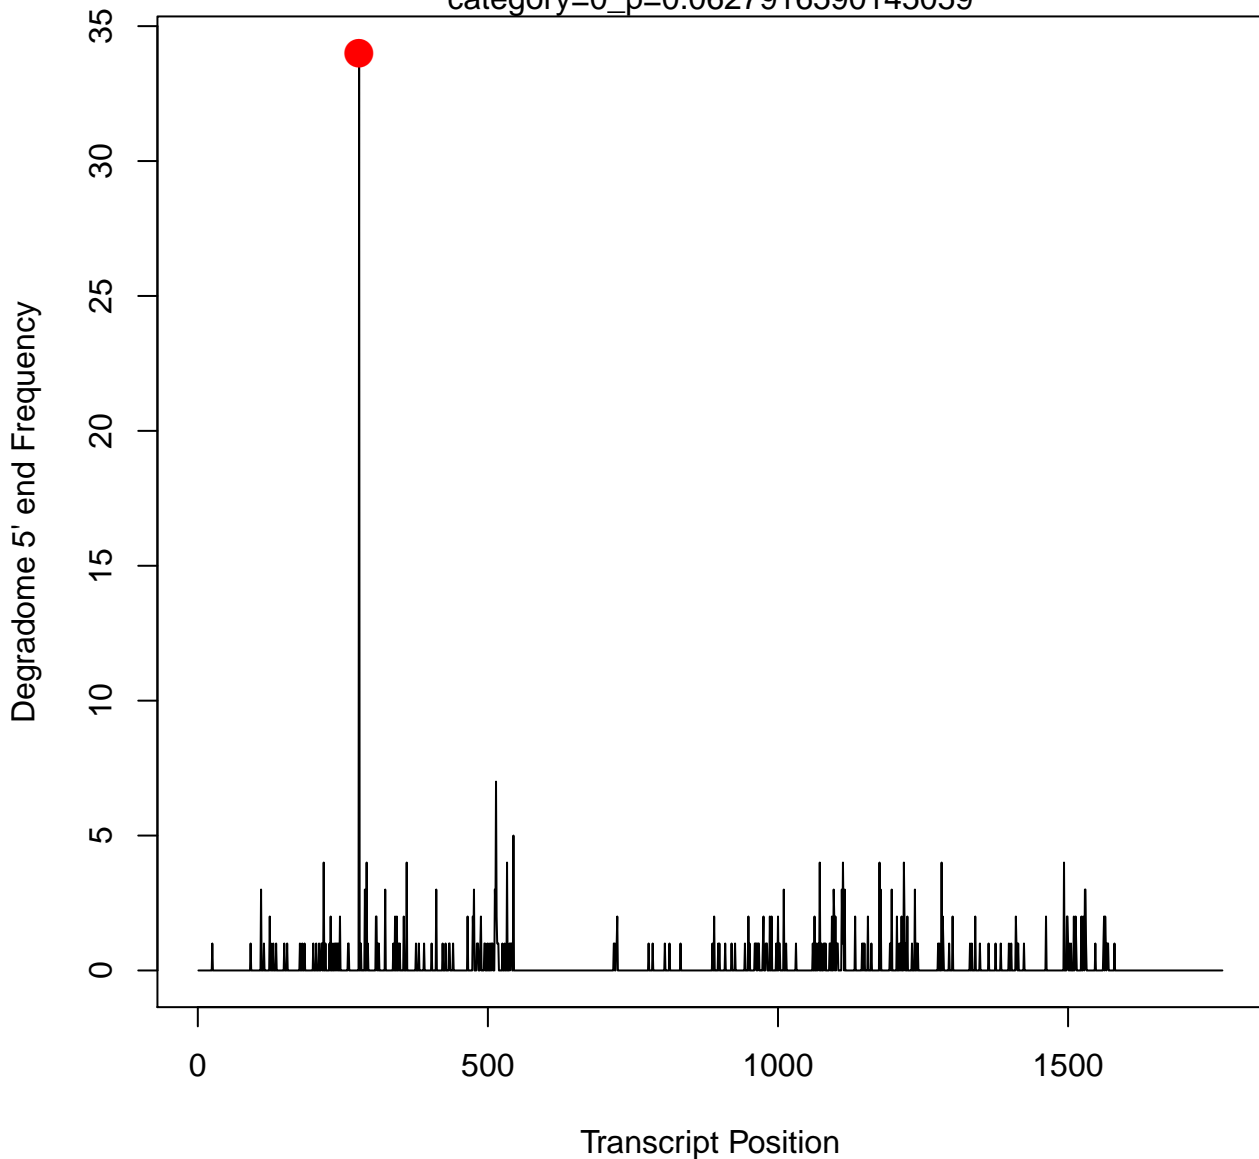

Supplement: s1 [file s1]

**T=Cluster-18410.34498\_Q=novel\_42\_S=355**

category=0\_p=0.00545759909929999

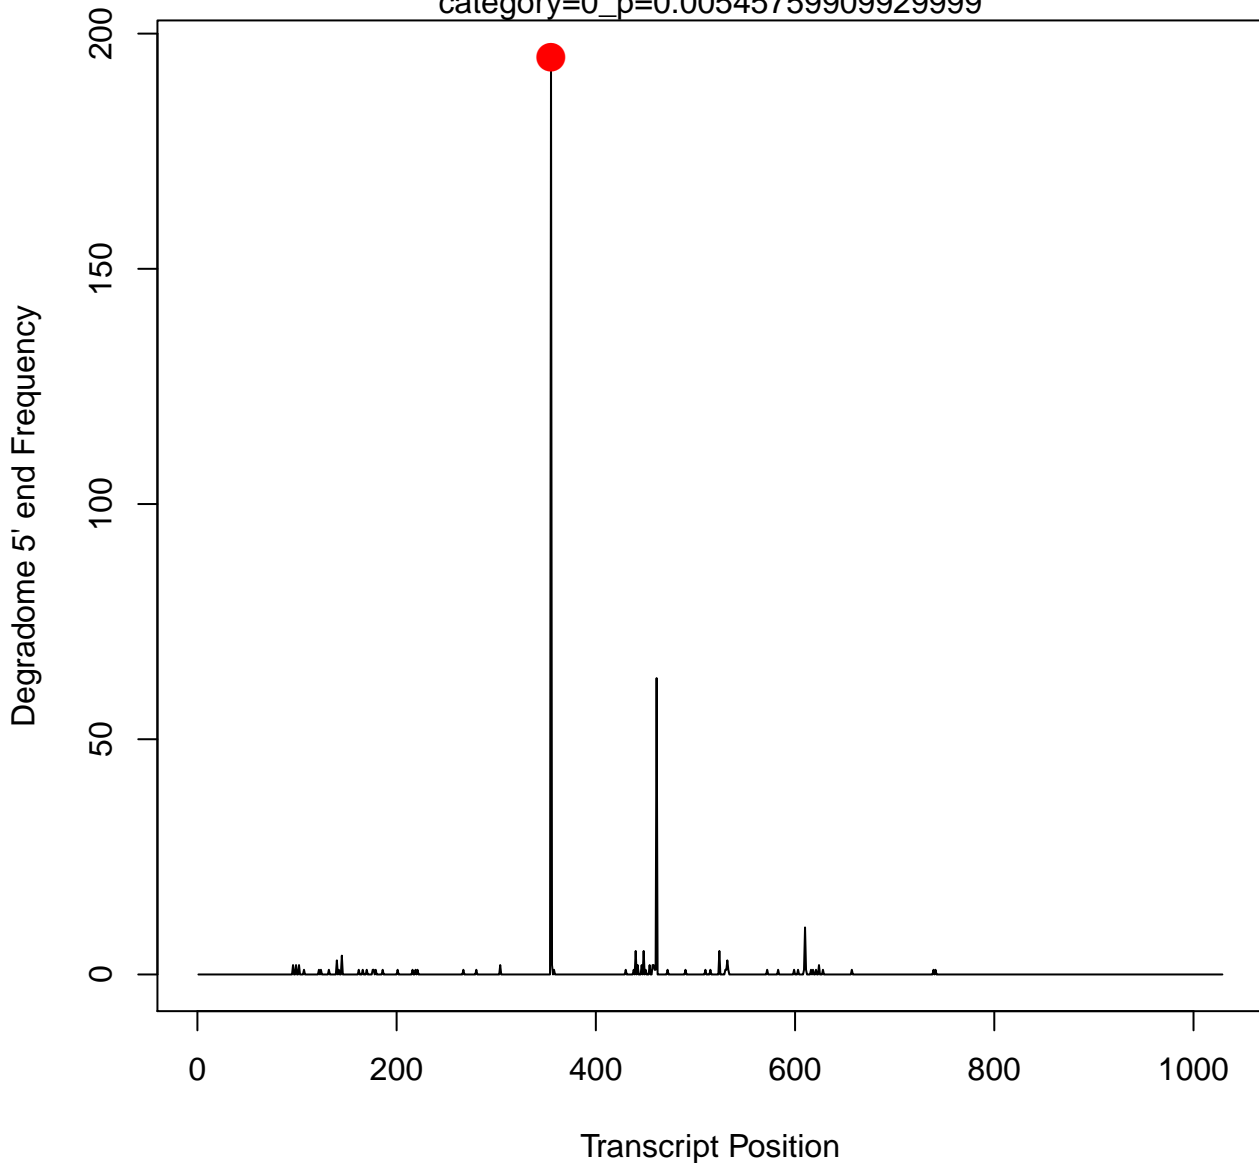

Supplement: s1 [file s1]

**T=Cluster-18410.81187\_Q=pma-miR951\_S=339**

category=0\_p=0.00464086203705827

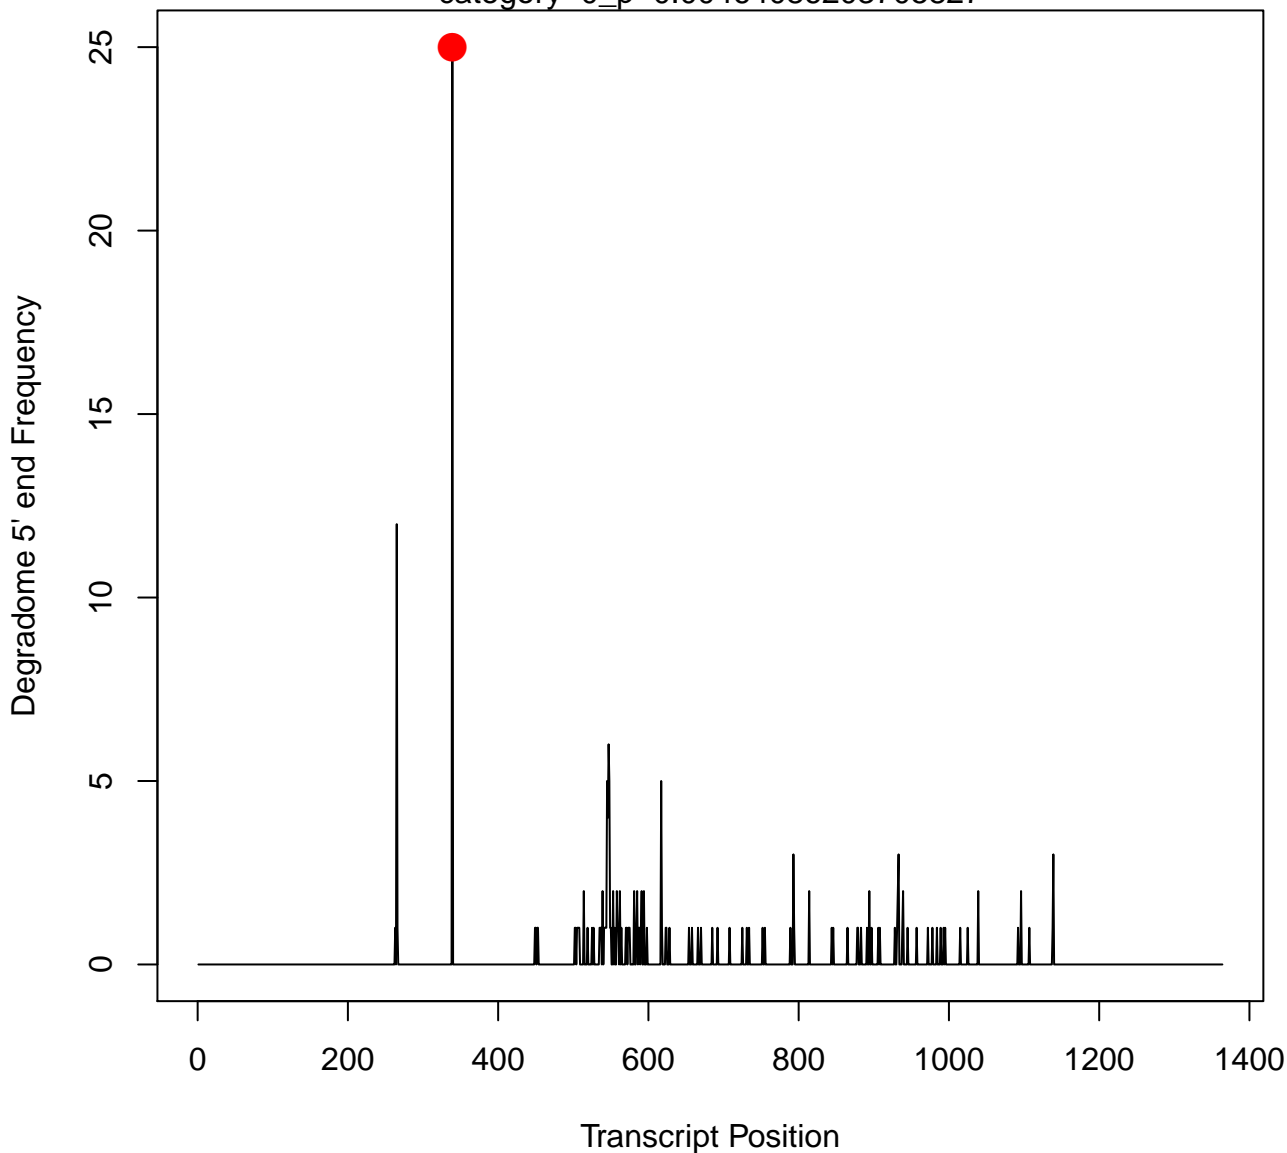

Supplement: s1 [file s1]

**T=Cluster-18410.13948\_Q=novel\_21\_S=1046**

category=0\_p=0.00273253291772324

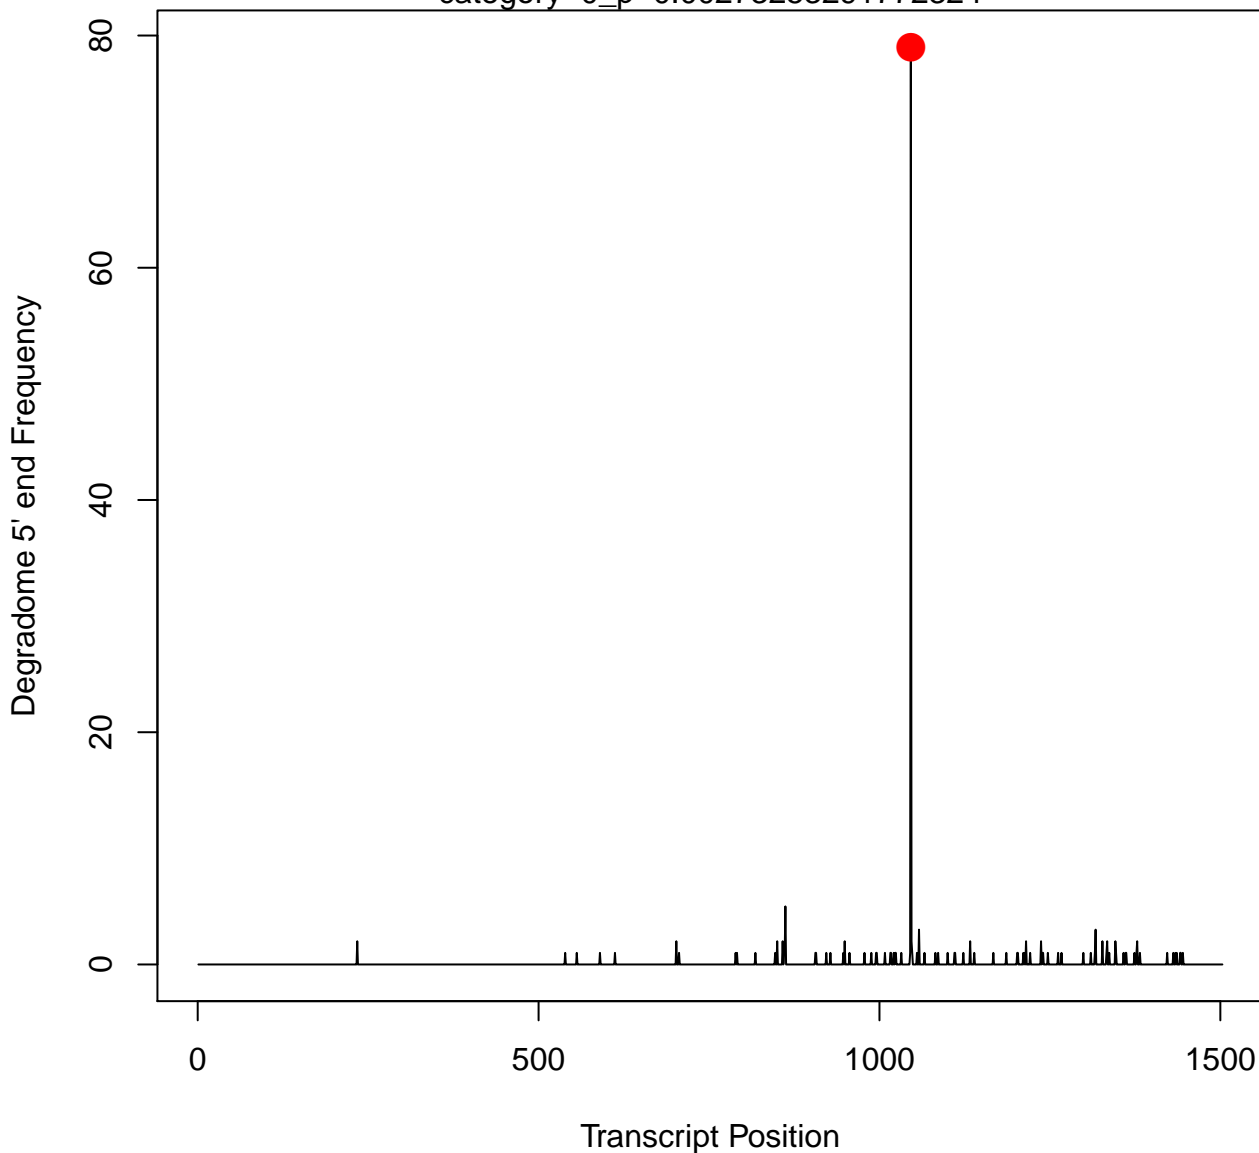

Supplement: s1 [file s1]

**T=Cluster-4562.0\_Q=pma-miR946a-3p\_S=399**

category=0\_p=0.00627366599194823

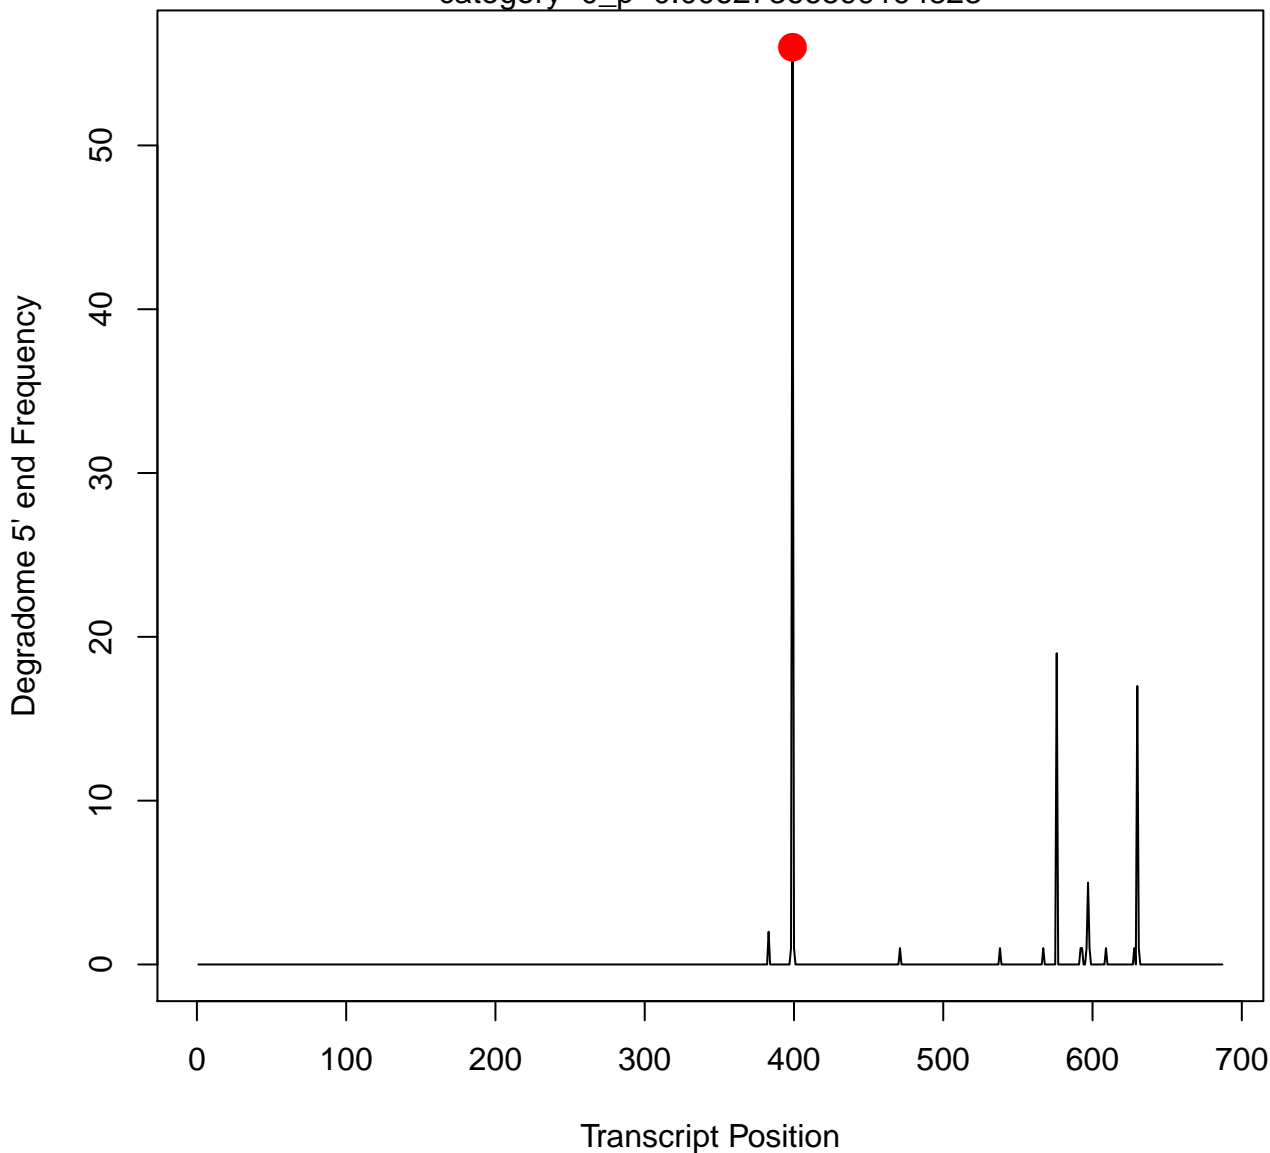

Supplement: s1 [file s1]

**T=Cluster-18410.57154\_Q=novel\_32\_S=665**

category=0\_p=0.0767905752939306

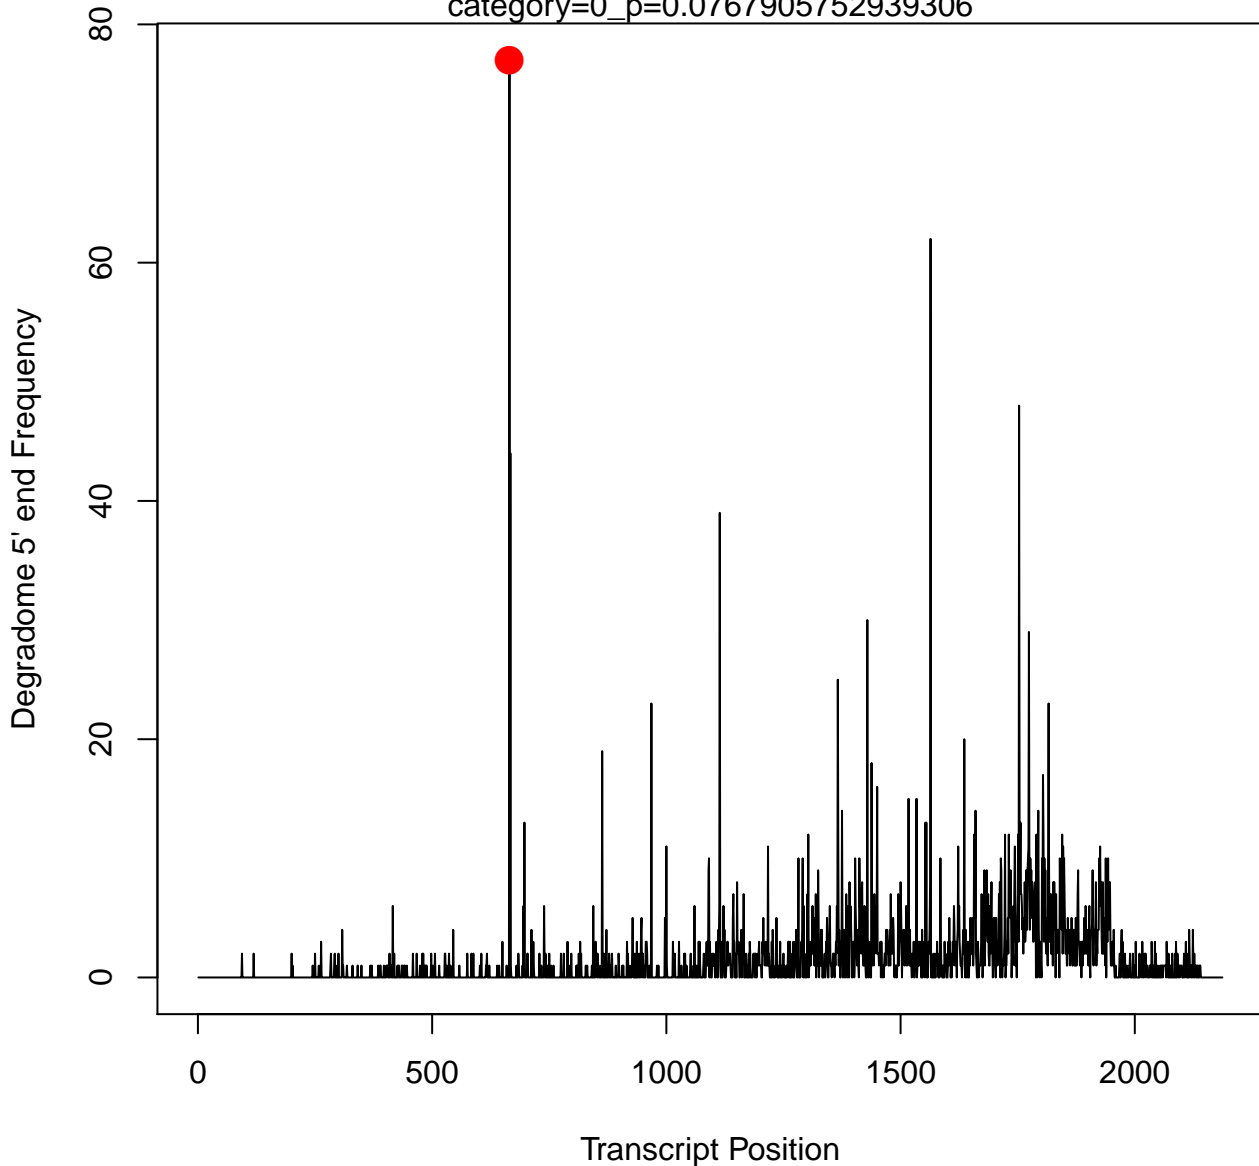

Supplement: s1 [file s1]

**T=Cluster-18410.69986\_Q=novel\_46\_S=954**

category=0\_p=0.00382345425486719

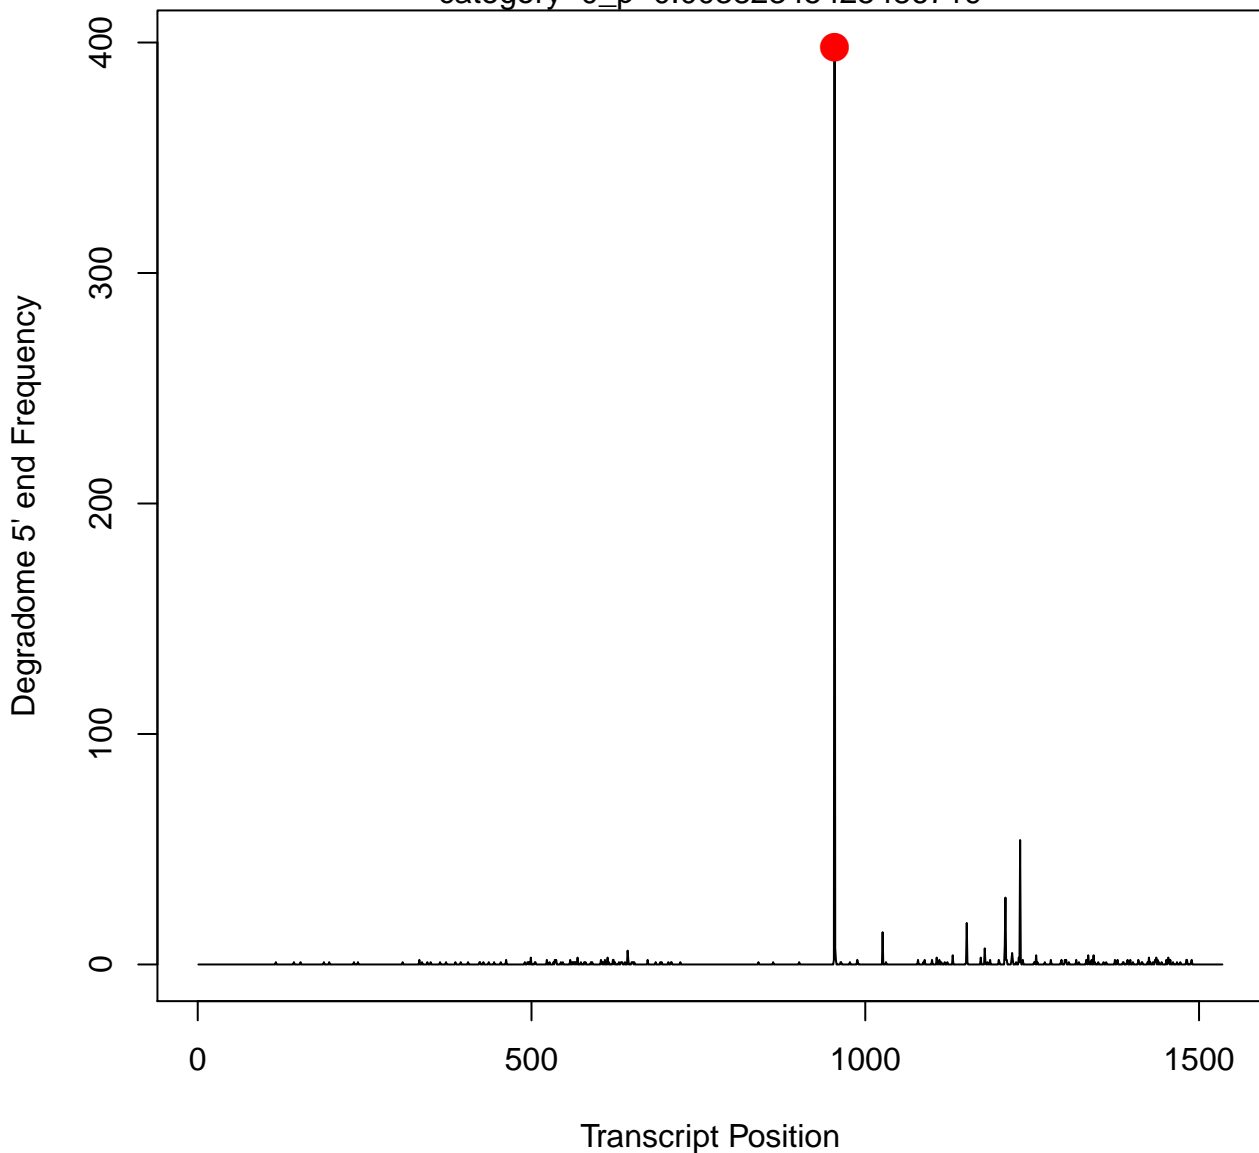

Supplement: s1 [file s1]

**T=Cluster-18410.37941\_Q=pma-miR482a\_S=617**

category=0\_p=0.0216523334092837

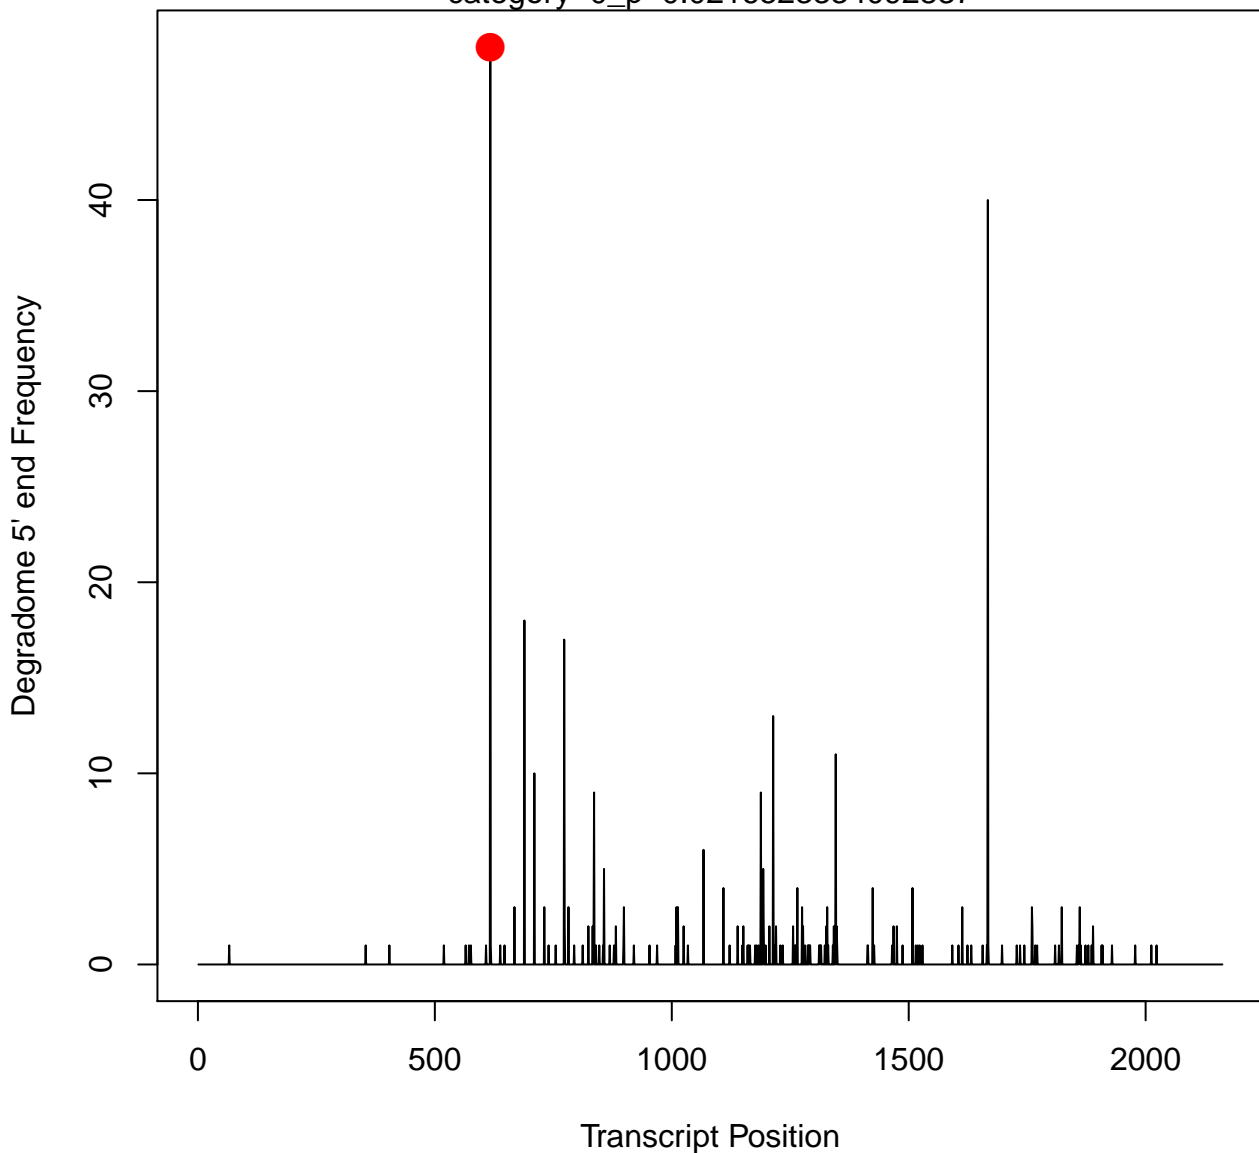

Supplement: s1 [file s1]

**T=Cluster-18410.98893\_Q=novel\_64\_S=292**

category=2\_p=0.0454020367599618

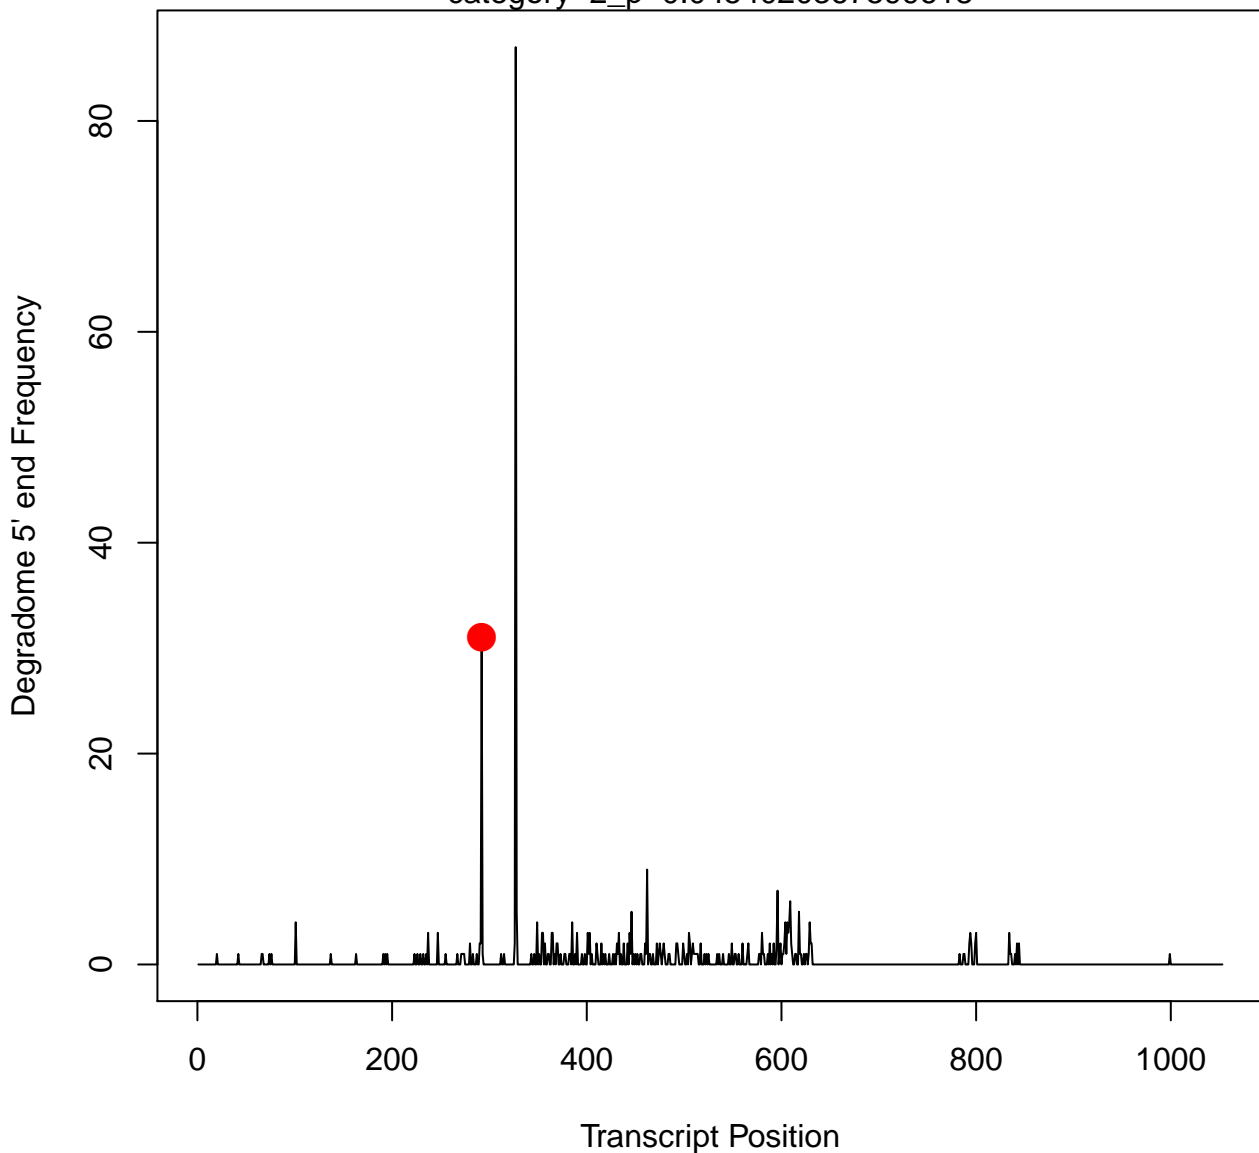

Supplement: s1 [file s1]

**T=Cluster-18410.117125\_Q=novel\_82\_S=505**

category=0\_p=0.0967802135642595

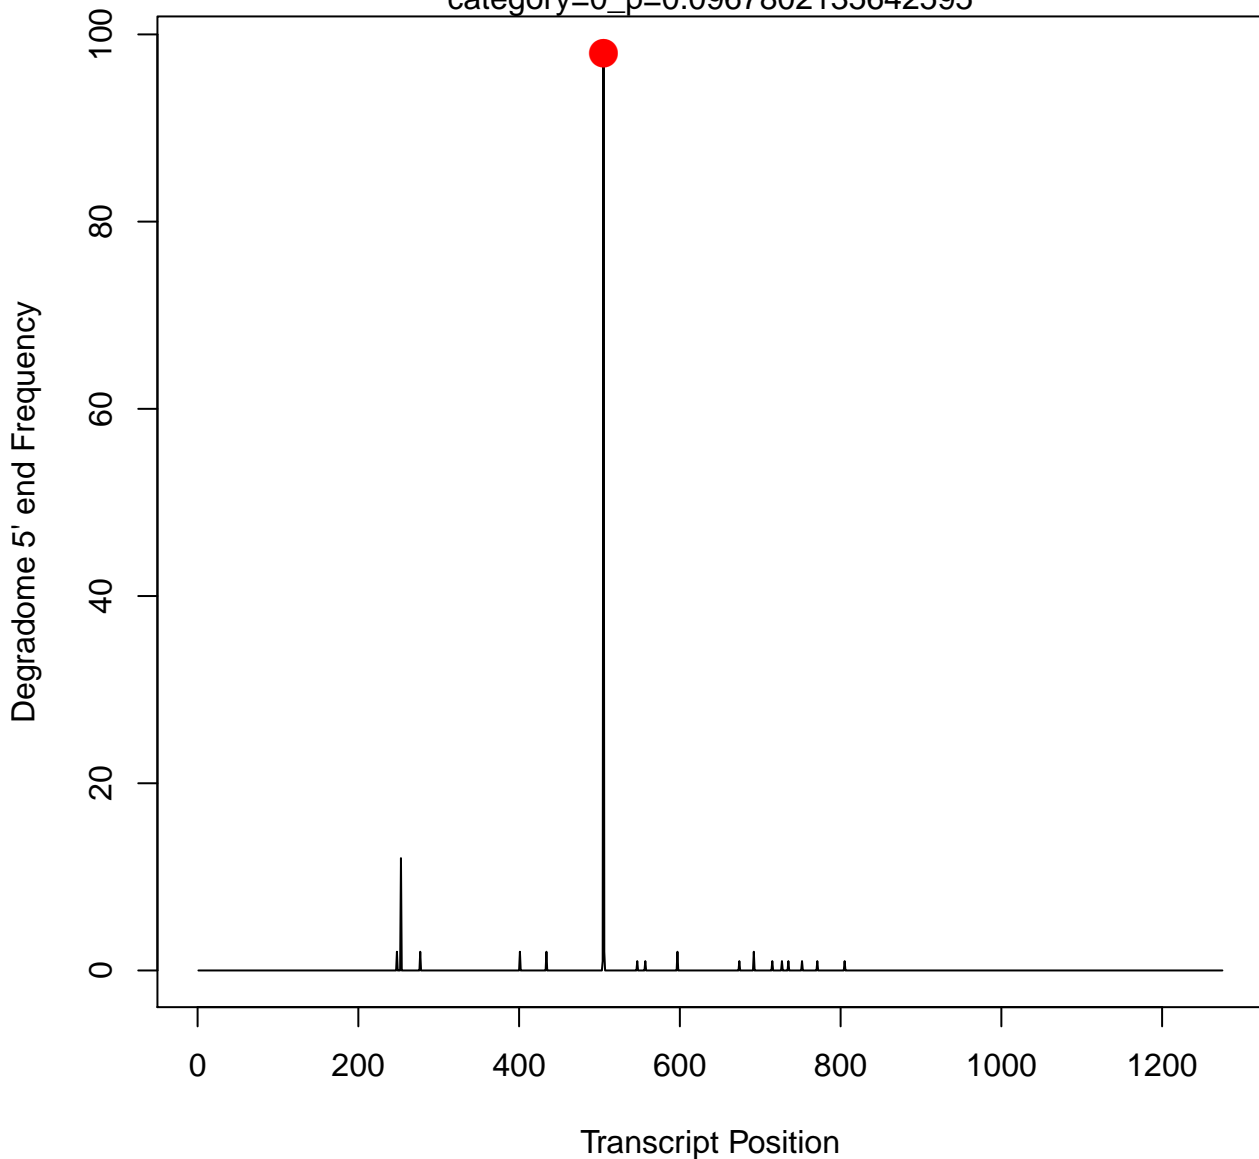

Supplement: s1 [file s1]

**T=Cluster-18410.97235\_Q=novel\_74\_S=489**

category=0\_p=0.0127781409216312

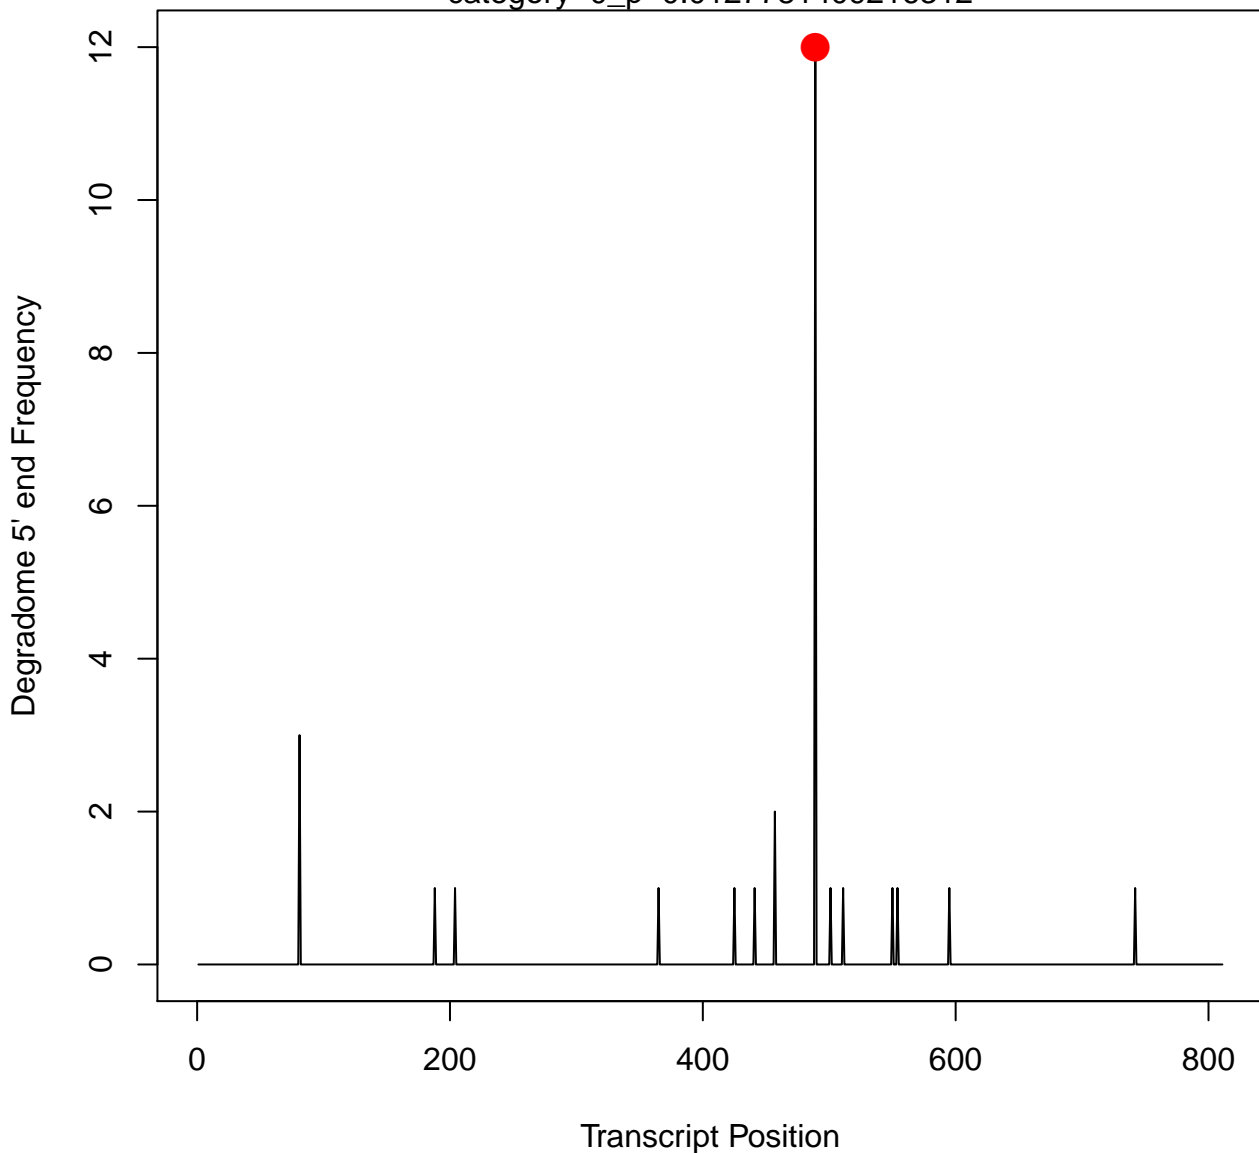

Supplement: s1 [file s1]

**T=Cluster-18410.88053\_Q=pma-miR1311\_S=2220**

category=1\_p=0.074448248253802

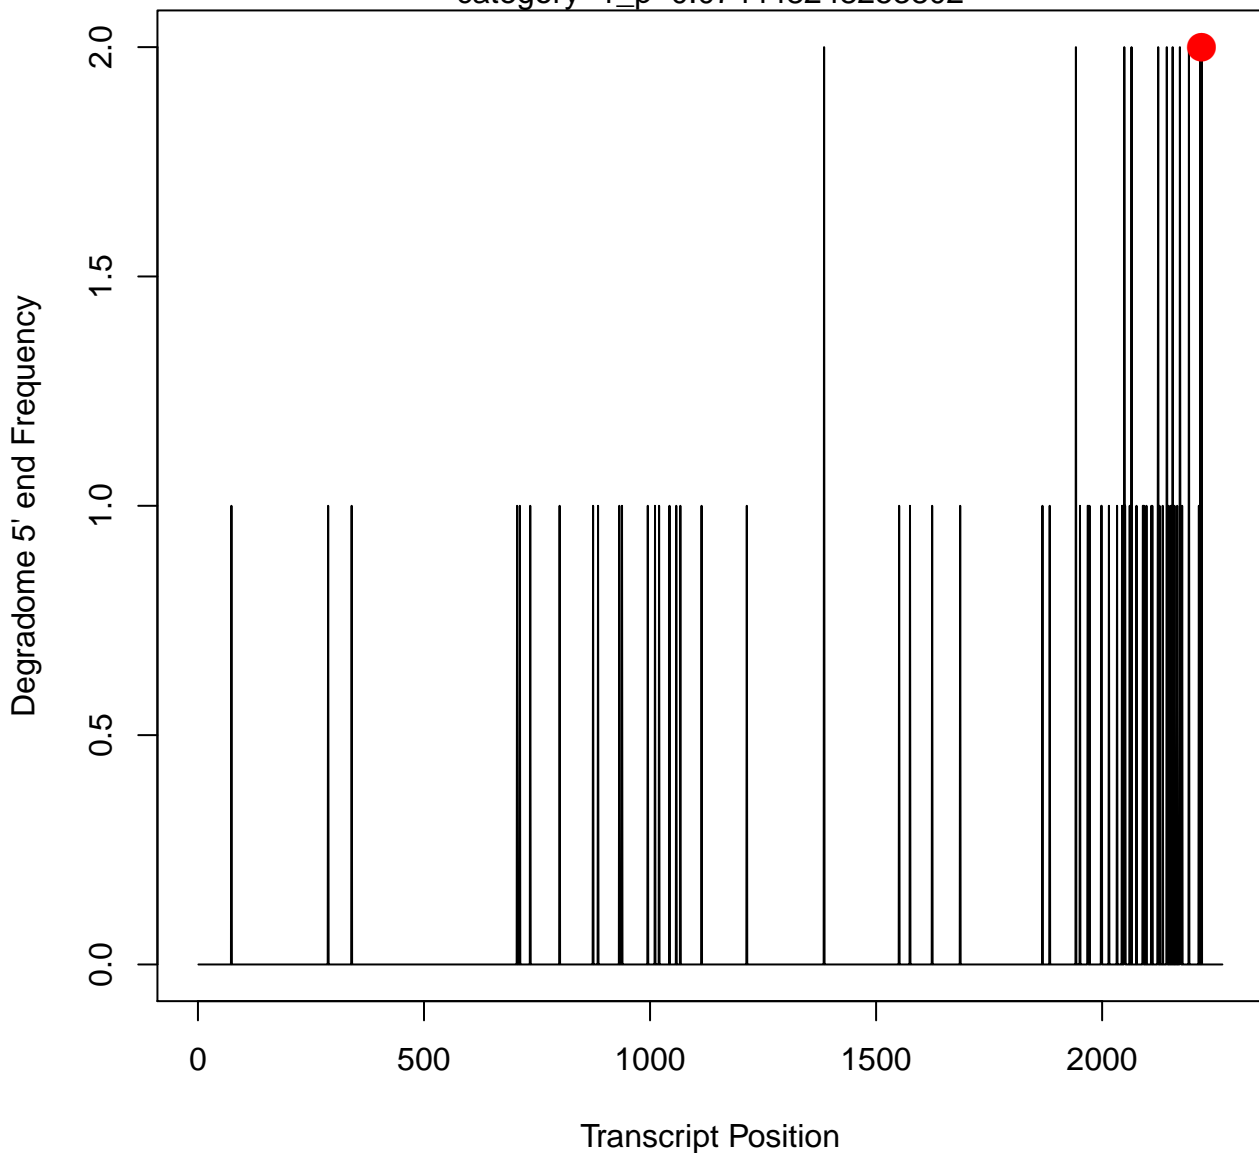

Supplement: s1 [file s1]

**T=Cluster-18410.31365\_Q=pma-miR951\_S=367**

category=0\_p=0.0211167816003845

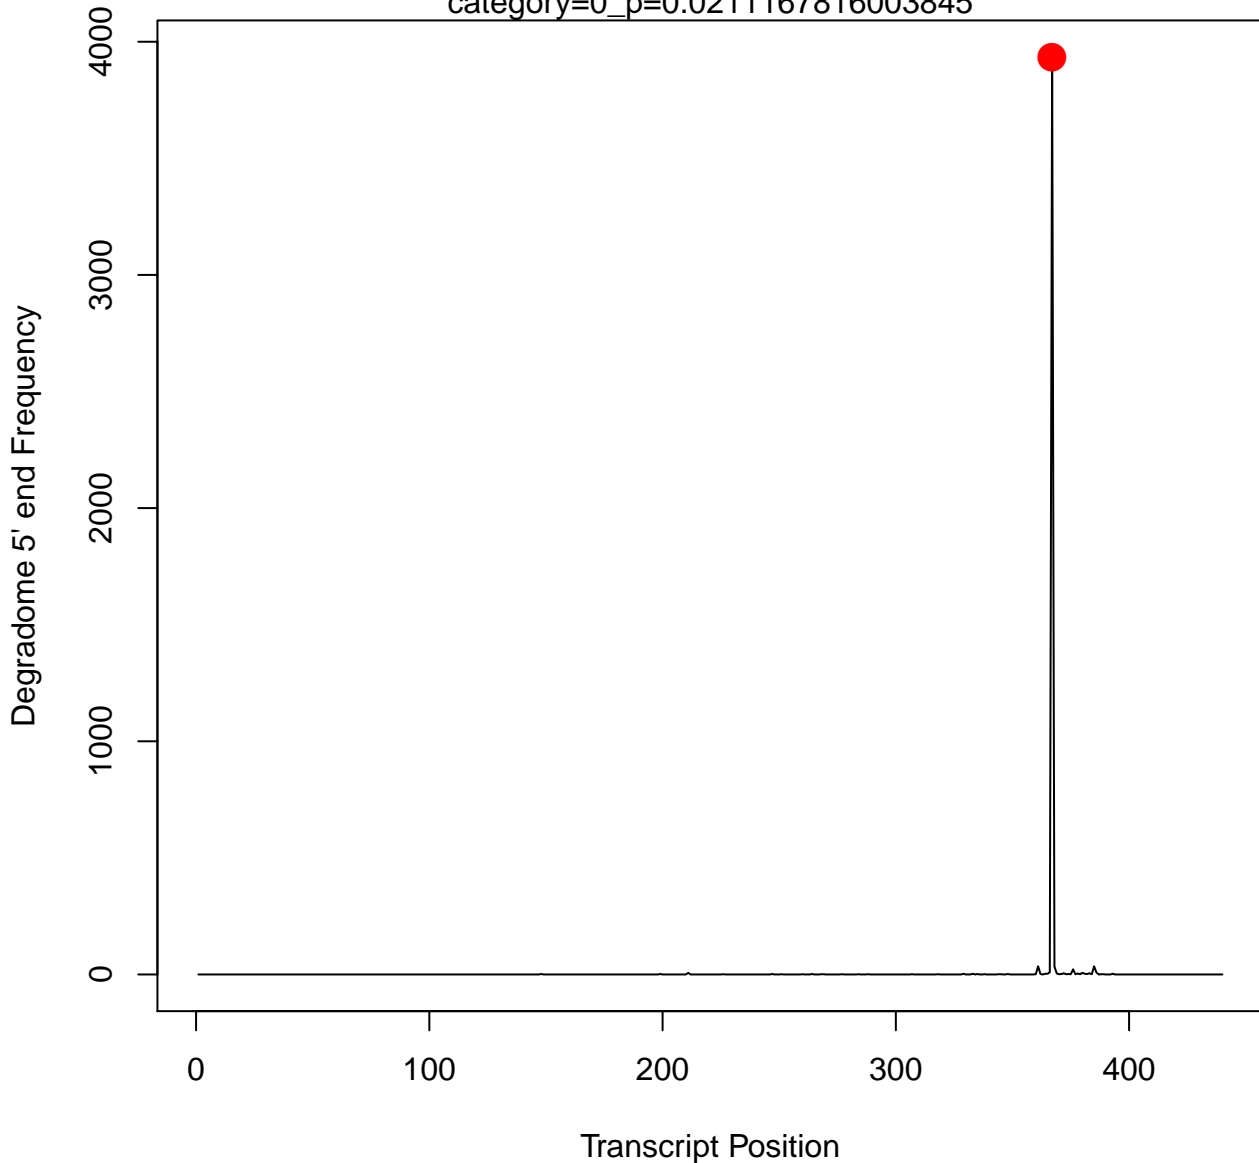

Supplement: s1 [file s1]

**T=Cluster-17922.0\_Q=novel\_9\_S=186**

category=2\_p=0.0673240995462872

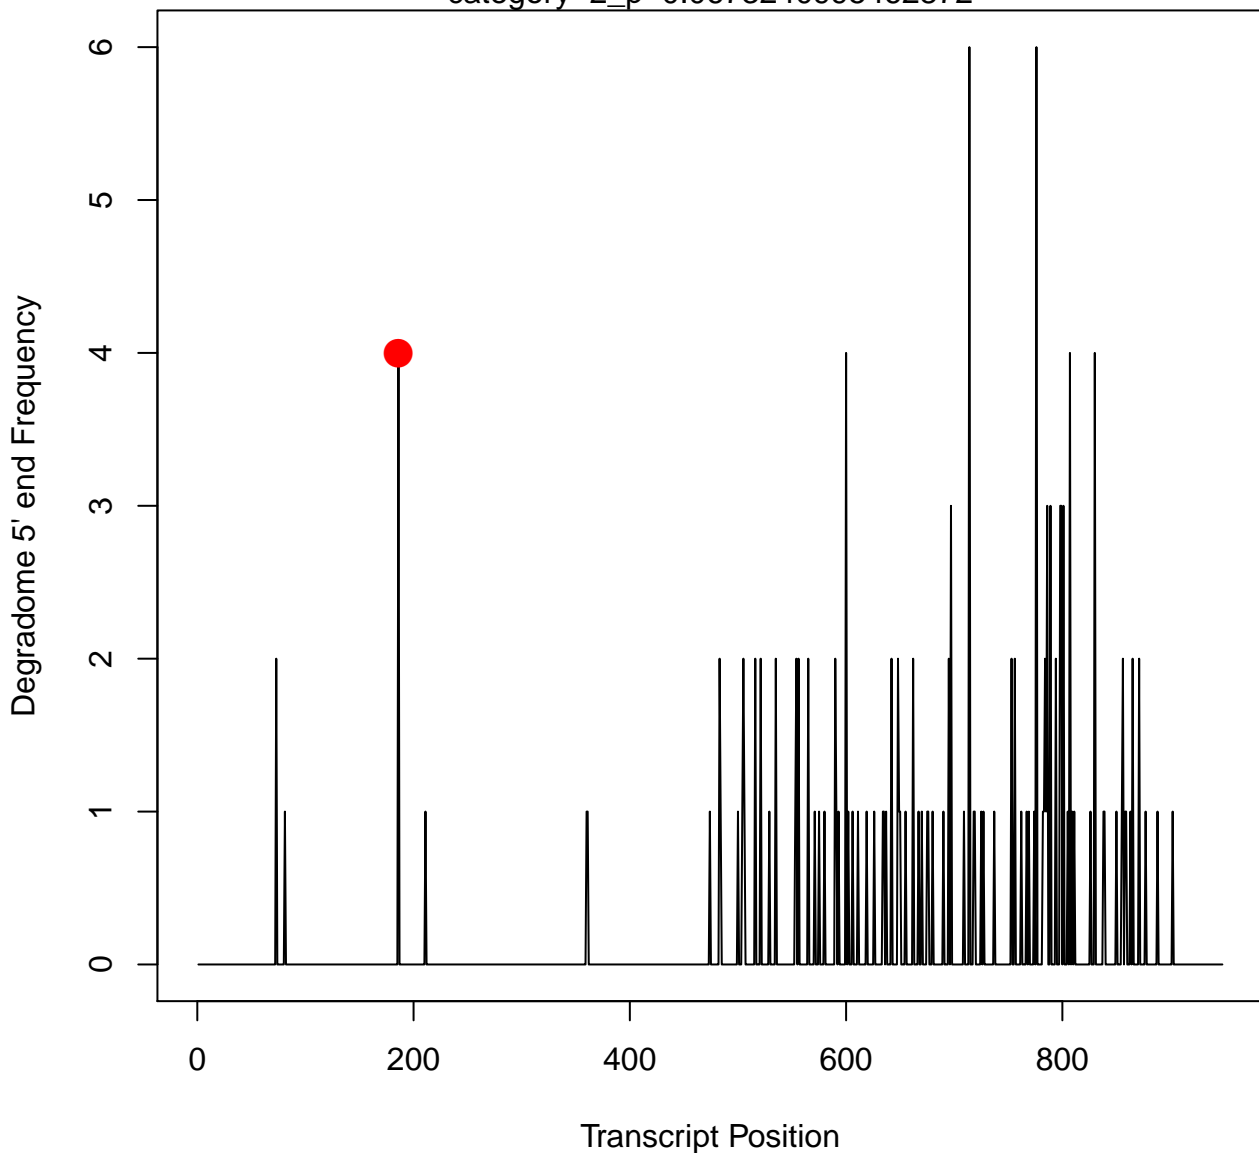

Supplement: s1 [file s1]

**T=Cluster-18410.45449\_Q=pma-miR946a-3p\_S=5093**

category=0\_p=0.0267254846978155

Degradome 5' end Frequency

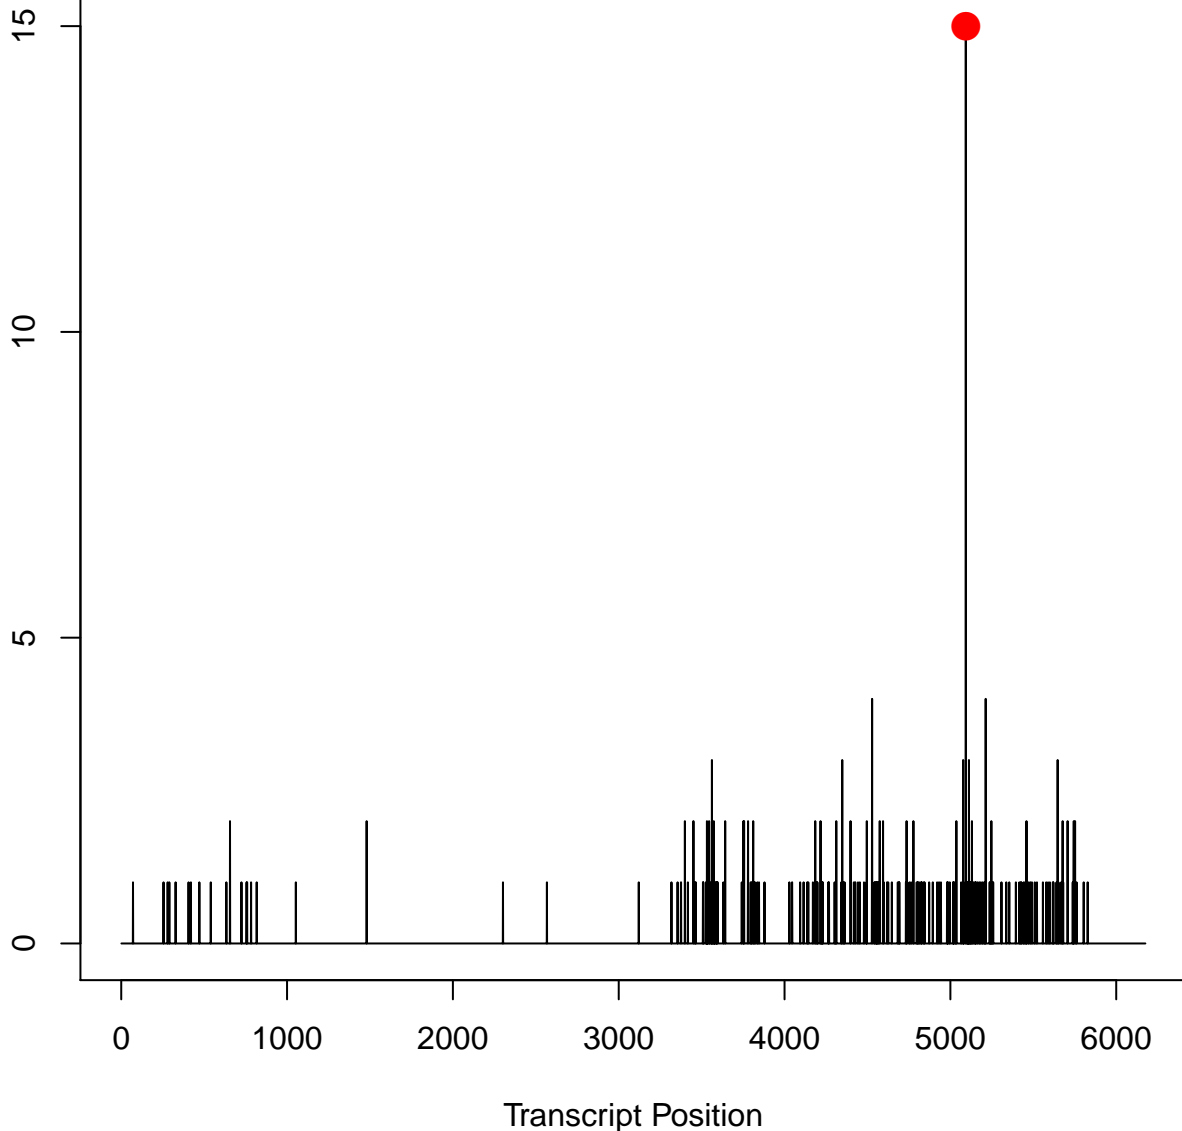

Supplement: s1 [file s1]

**T=Cluster-18410.71810\_Q=novel\_59\_S=1122**

category=0\_p=0.033360626563109

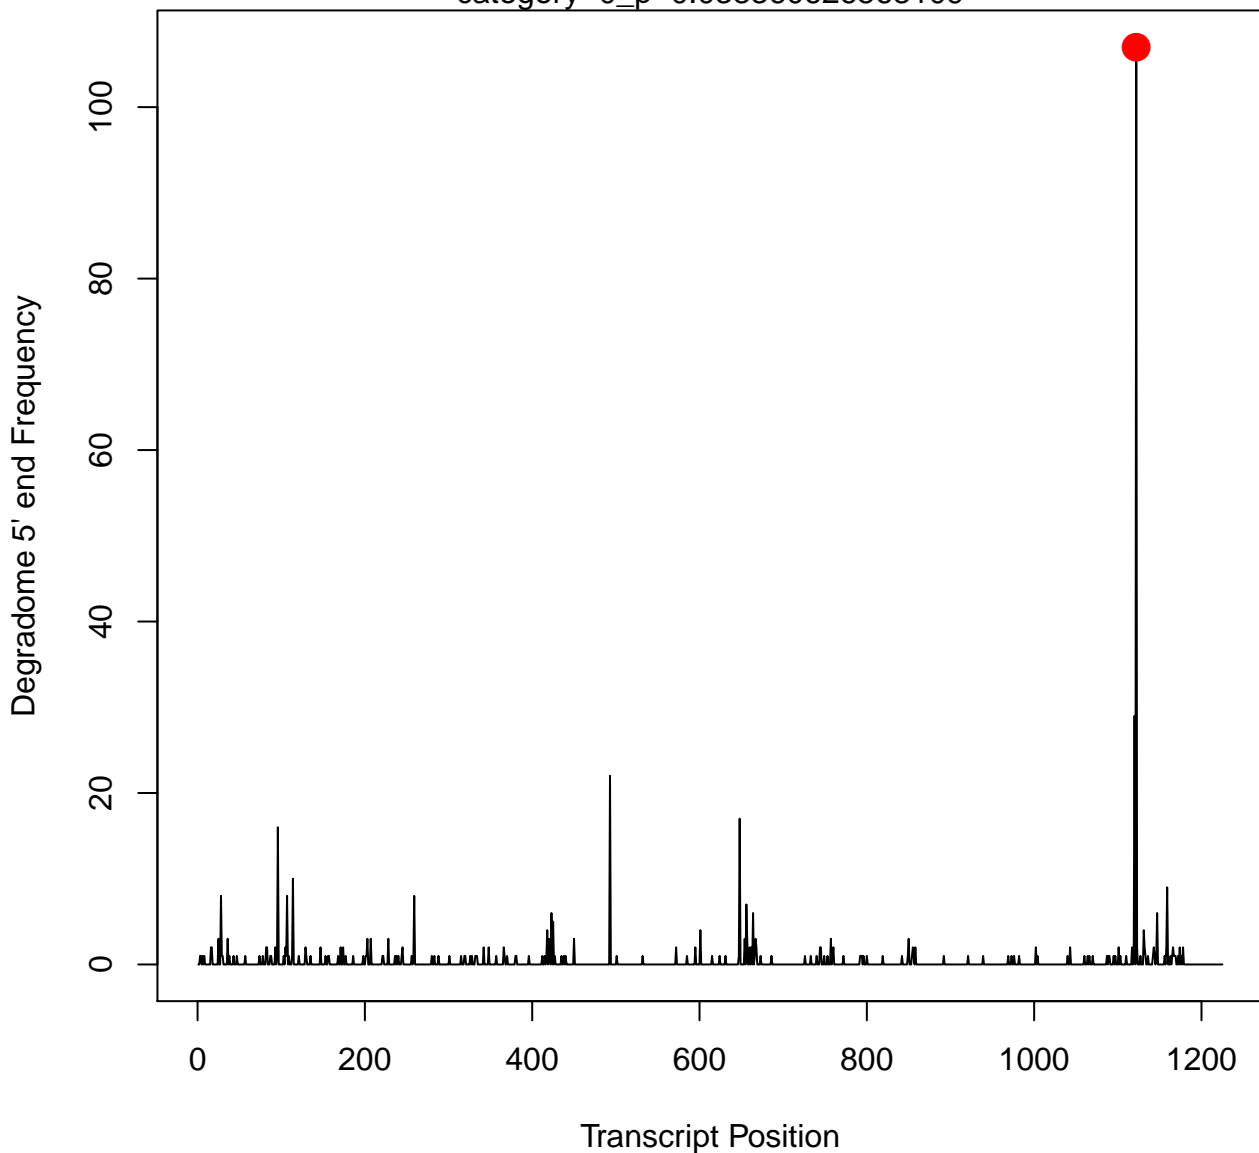

Supplement: s1 [file s1]

**T=Cluster-18410.65964\_Q=novel\_14\_S=151**

category=0\_p=0.0391621236097791

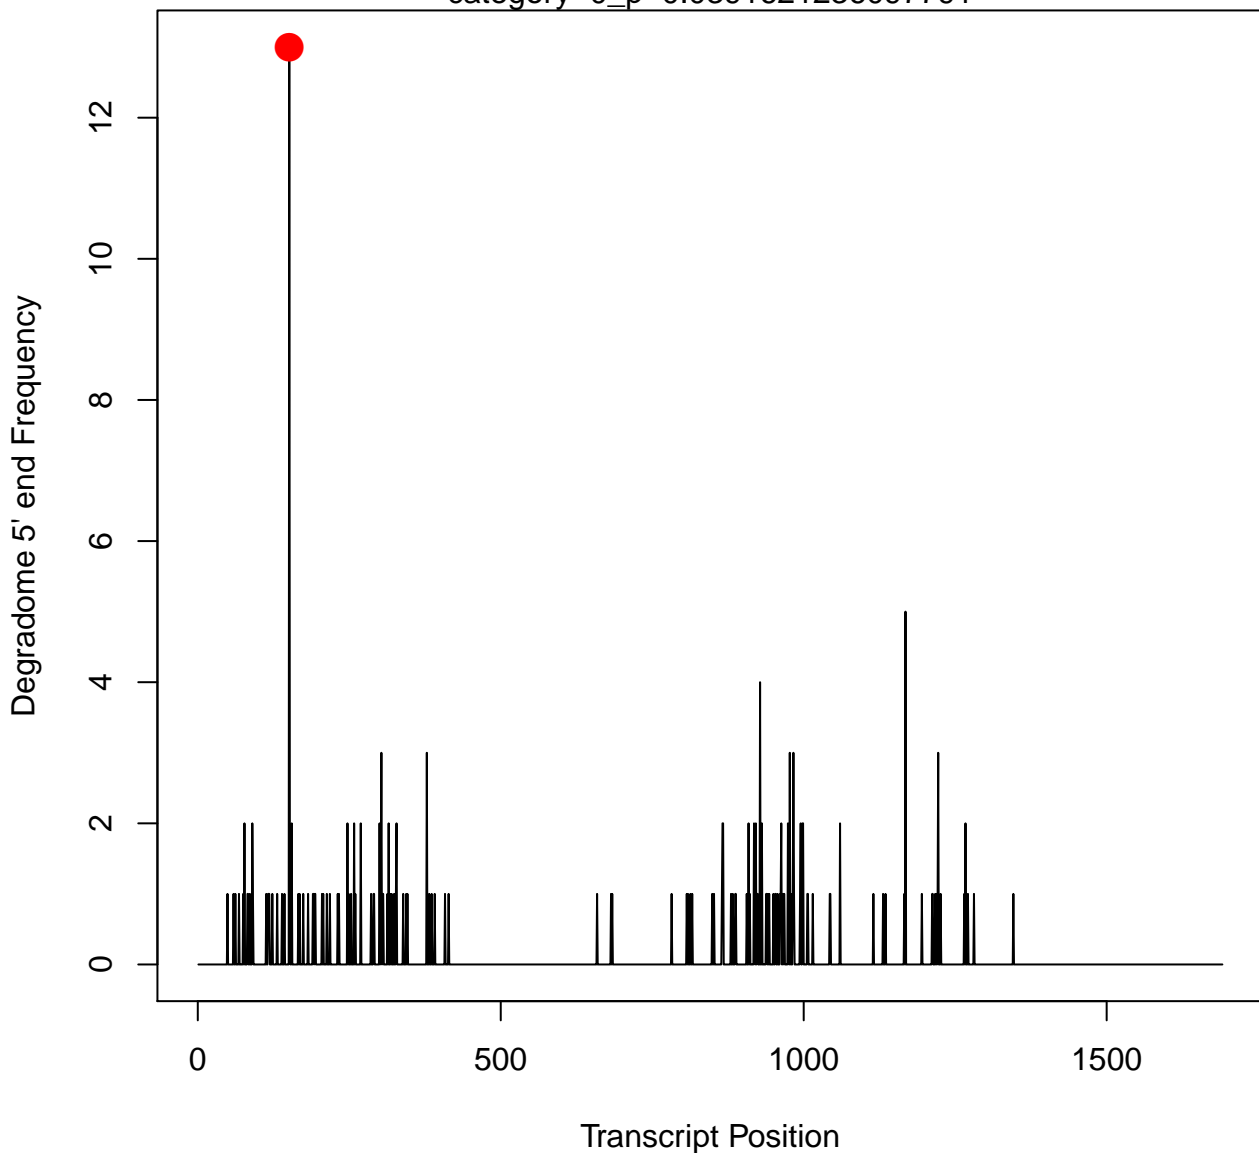

Supplement: s1 [file s1]

**T=Cluster-18410.113037\_Q=novel\_2\_S=1190**

category=0\_p=0.0415254157914902

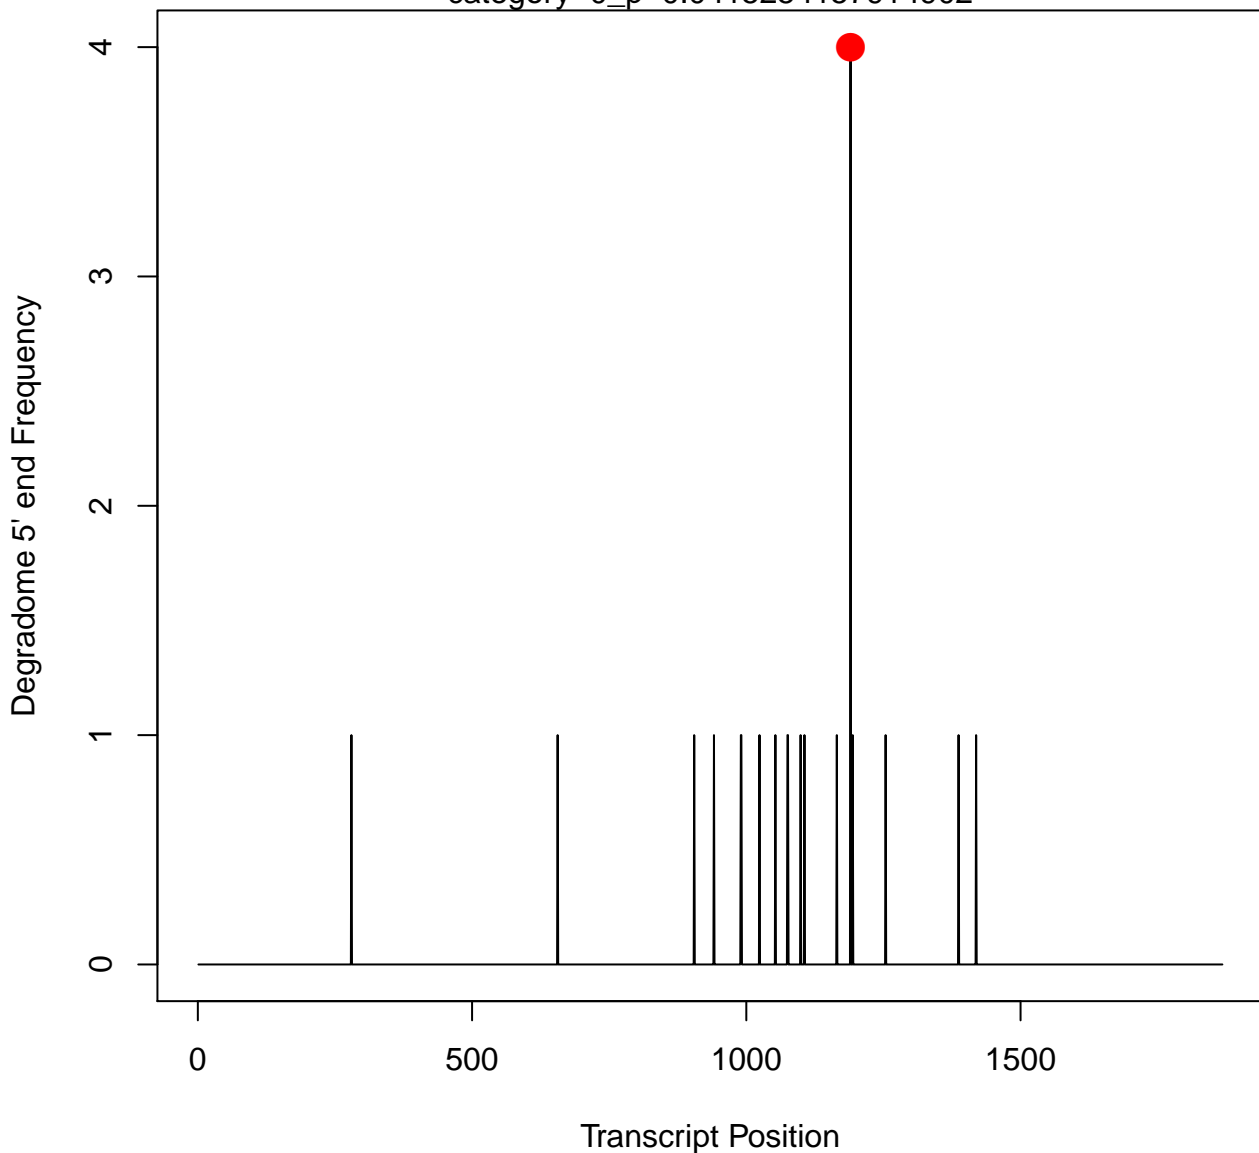

Supplement: s1 [file s1]

**T=Cluster-18410.95708\_Q=pma-miR951\_S=280**

category=0\_p=0.0127781409216312

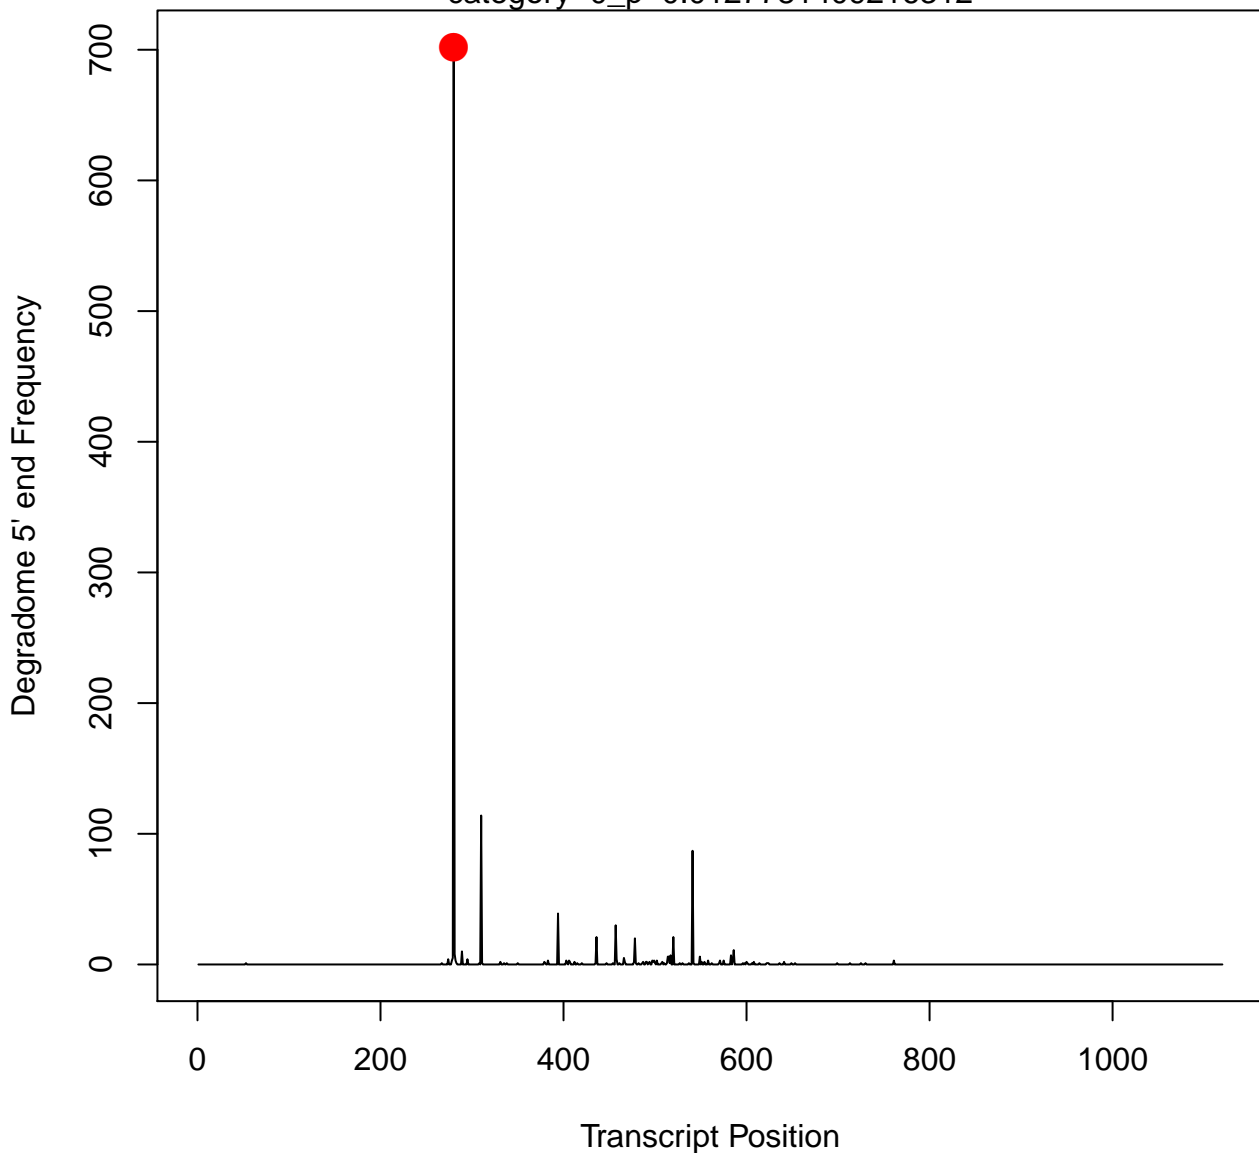

Supplement: s1 [file s1]

**T=Cluster-12424.0\_Q=pma-miR946a-3p\_S=340**

category=4\_p=0.0942809831727407

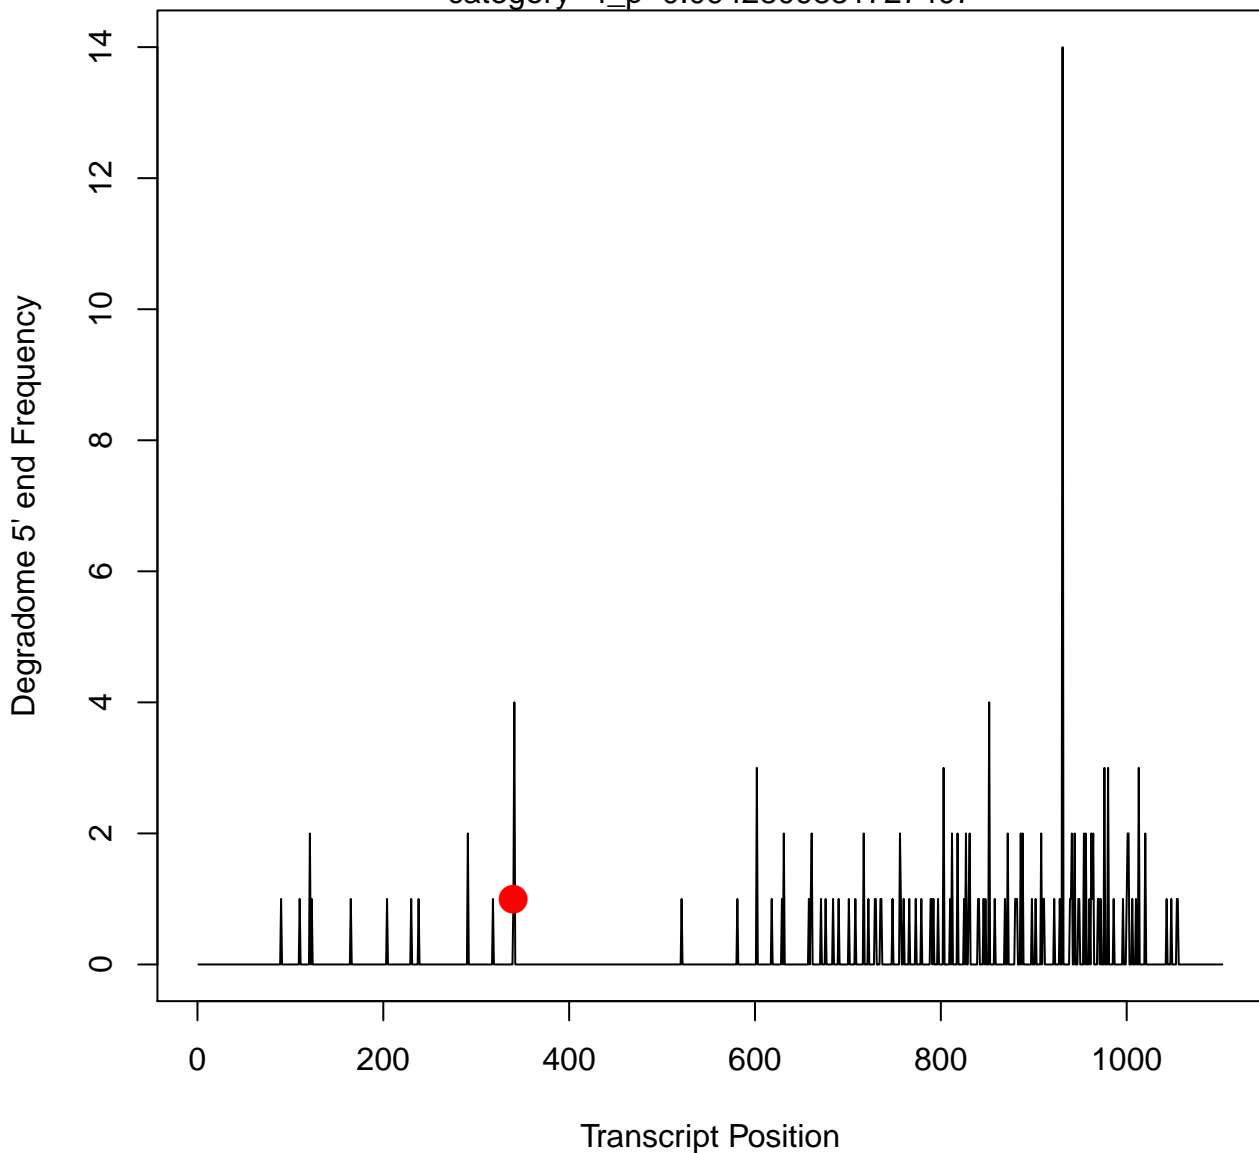

Supplement: s1 [file s1]

**T=Cluster-18410.89939\_Q=novel\_117\_S=512**

category=0\_p=0.00027358987754178

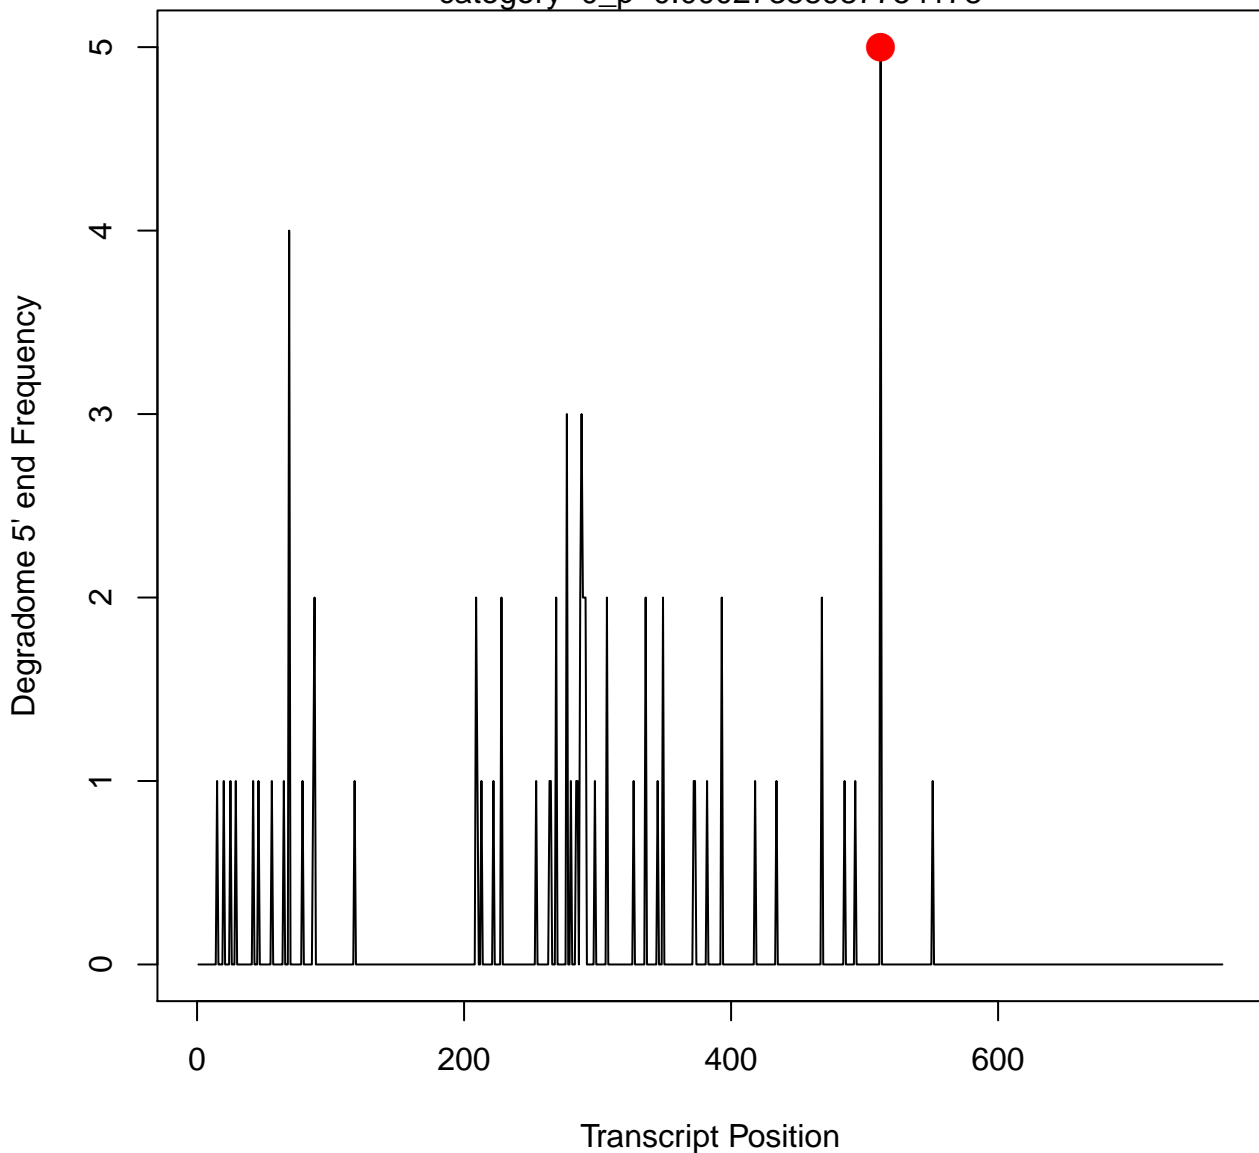

Supplement: s1 [file s1]

**T=Cluster-18410.113417\_Q=novel\_23\_S=34**

category=0\_p=0.00191355797950399

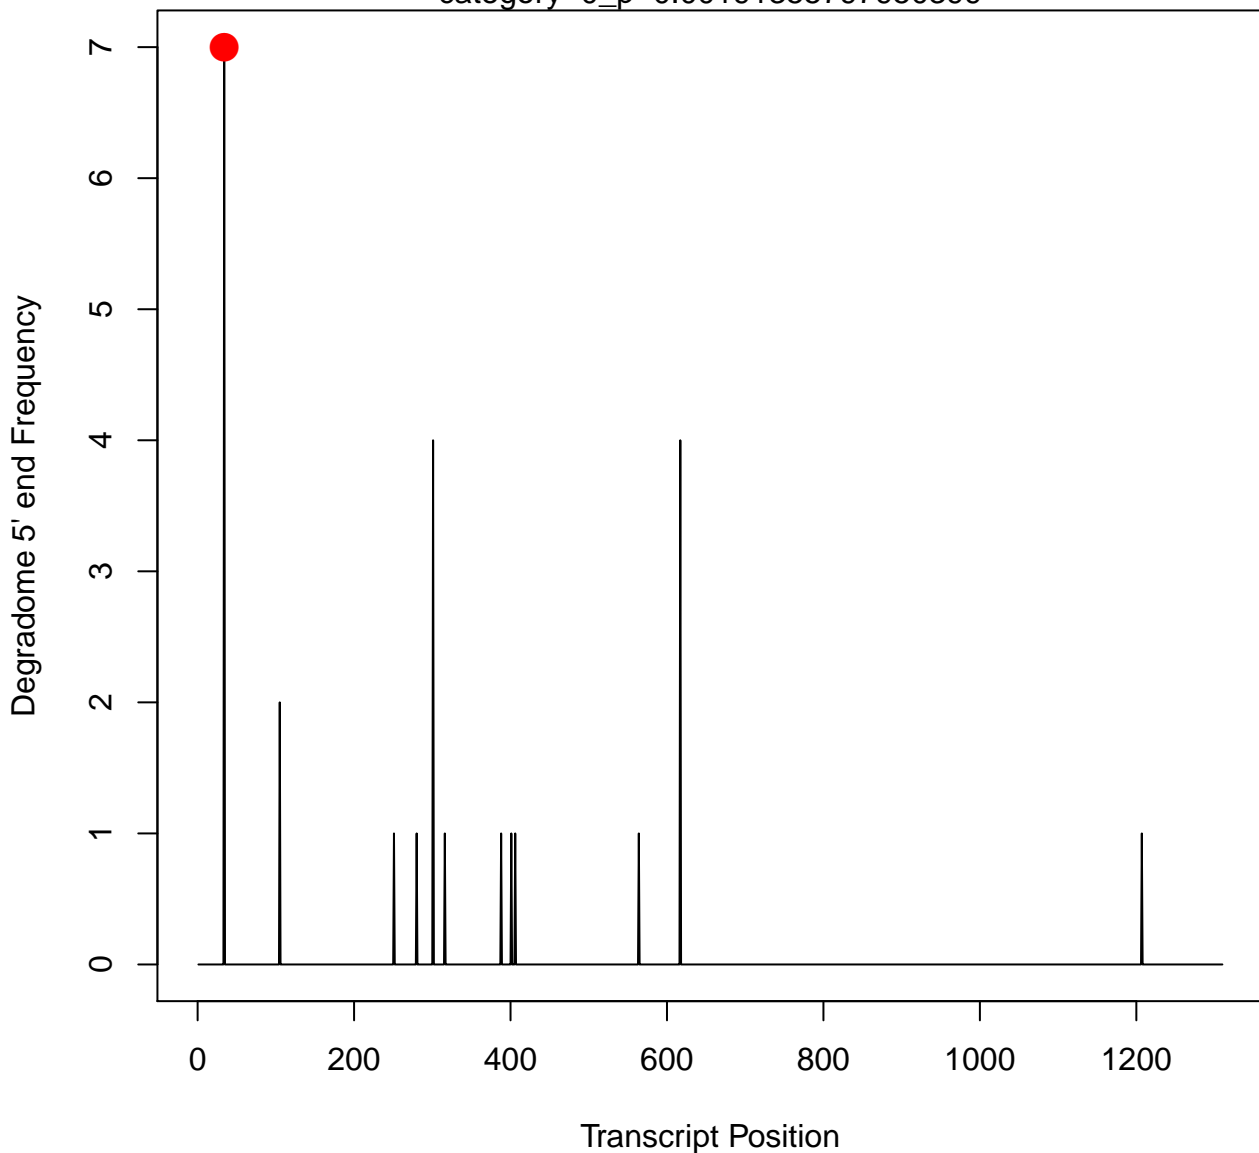

Supplement: s1 [file s1]

**T=Cluster-18410.32910 Q=novel 35 S=386**

category=0\_p=0.00355083585007077

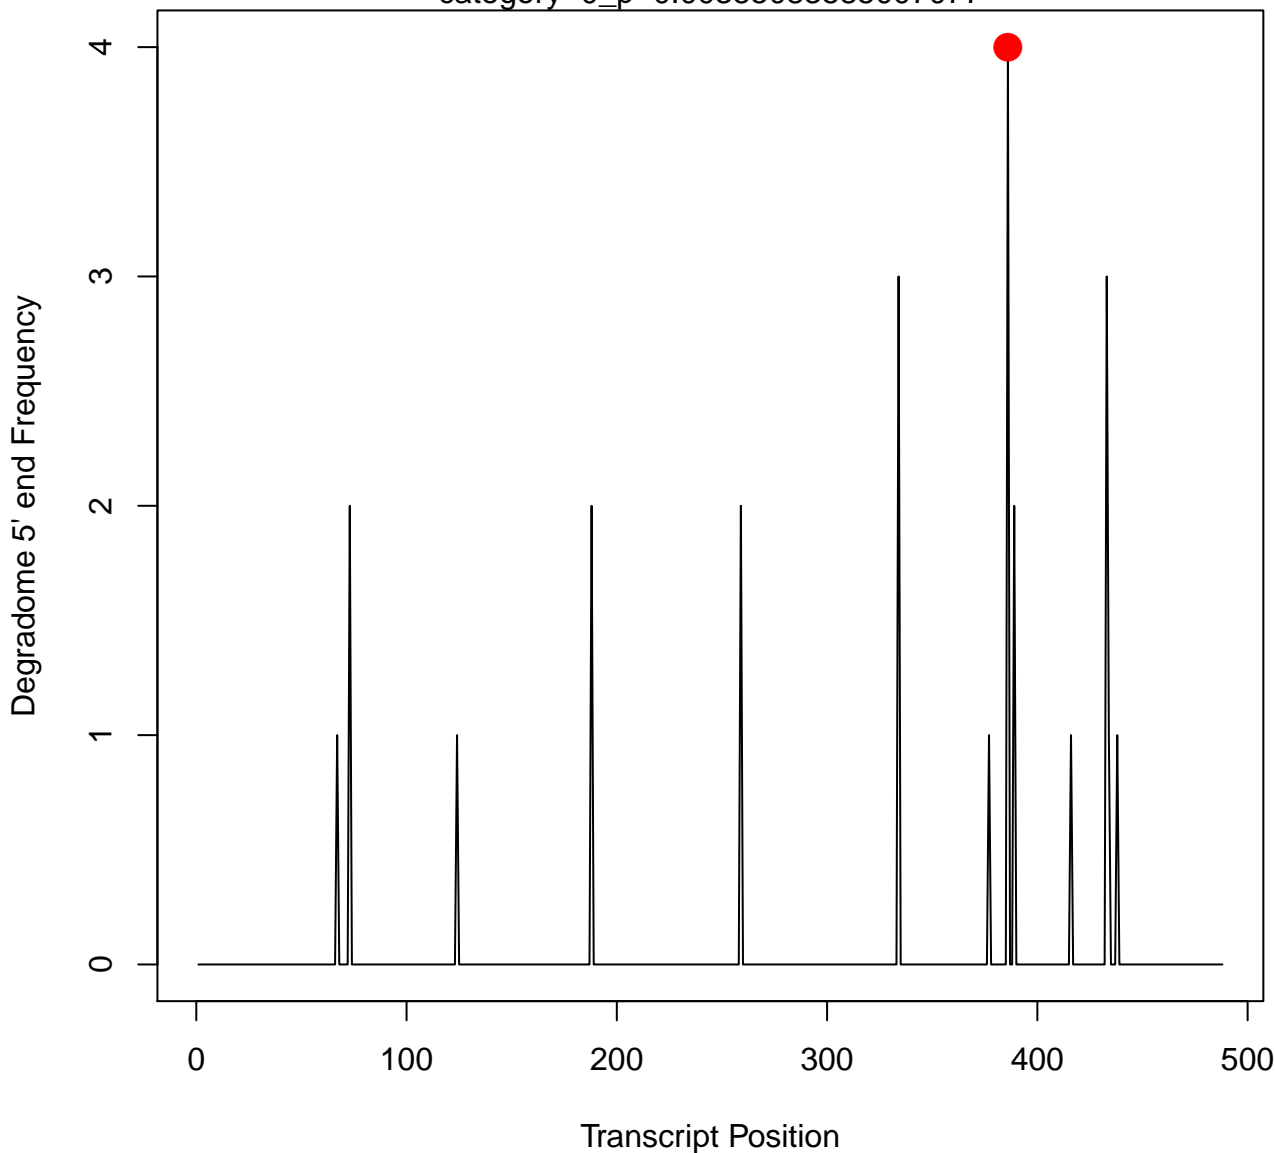

Supplement: s1 [file s1]

**T=Cluster-18229.0\_Q=novel\_42\_S=80**

category=0\_p=0.00109391048354923

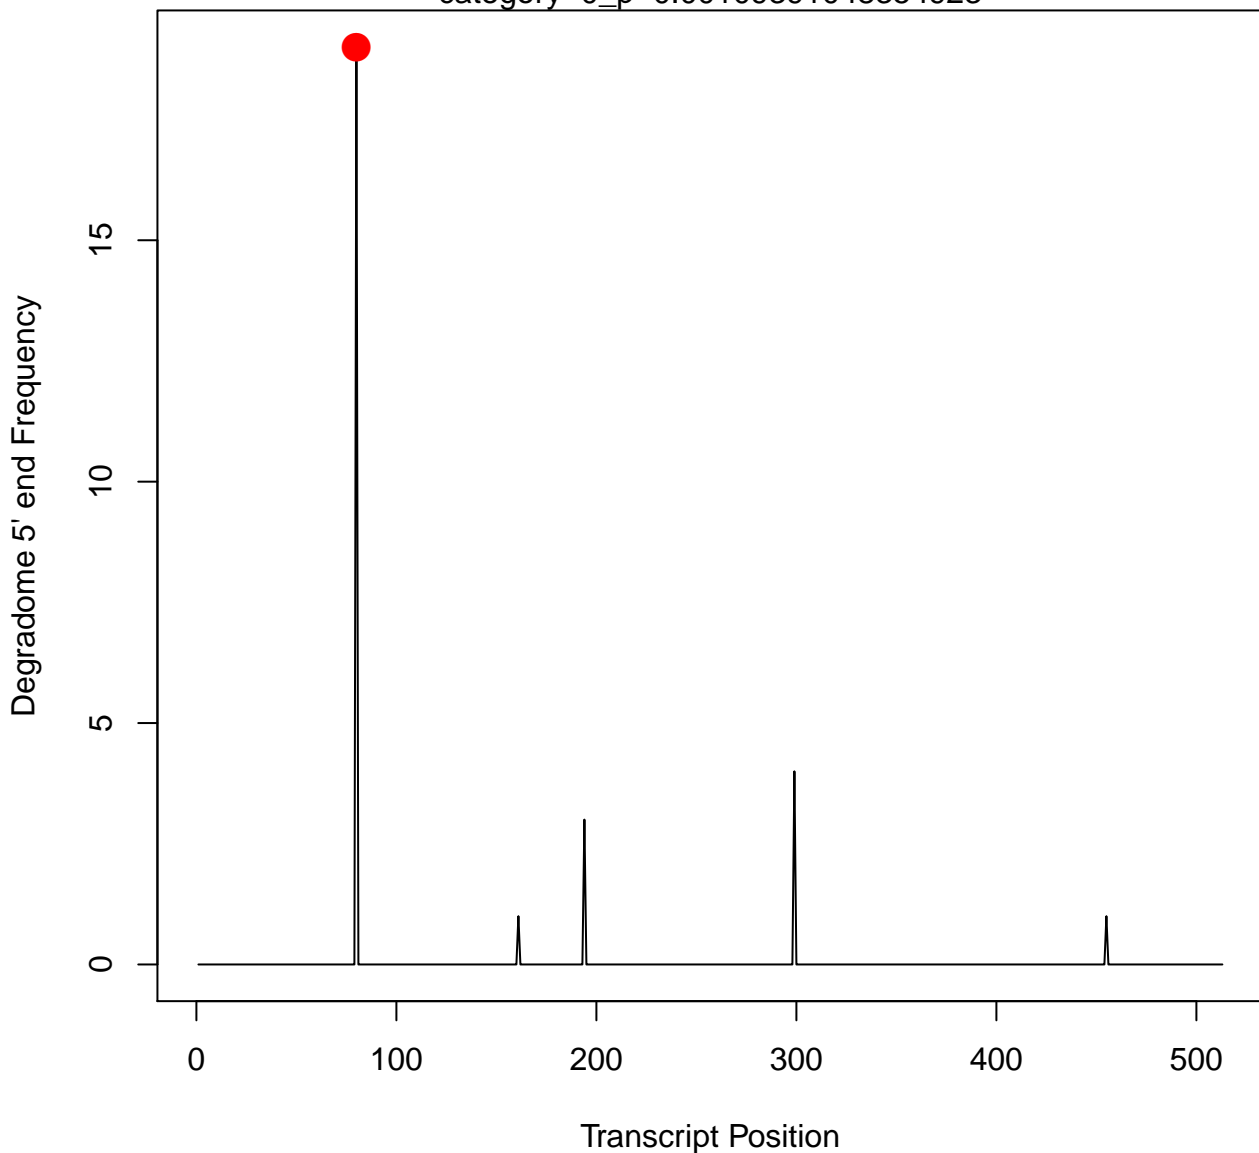

Supplement: s1 [file s1]

**T=Cluster-18410.79529\_Q=novel\_168\_S=2089**

category=0\_p=0.0269917627532715

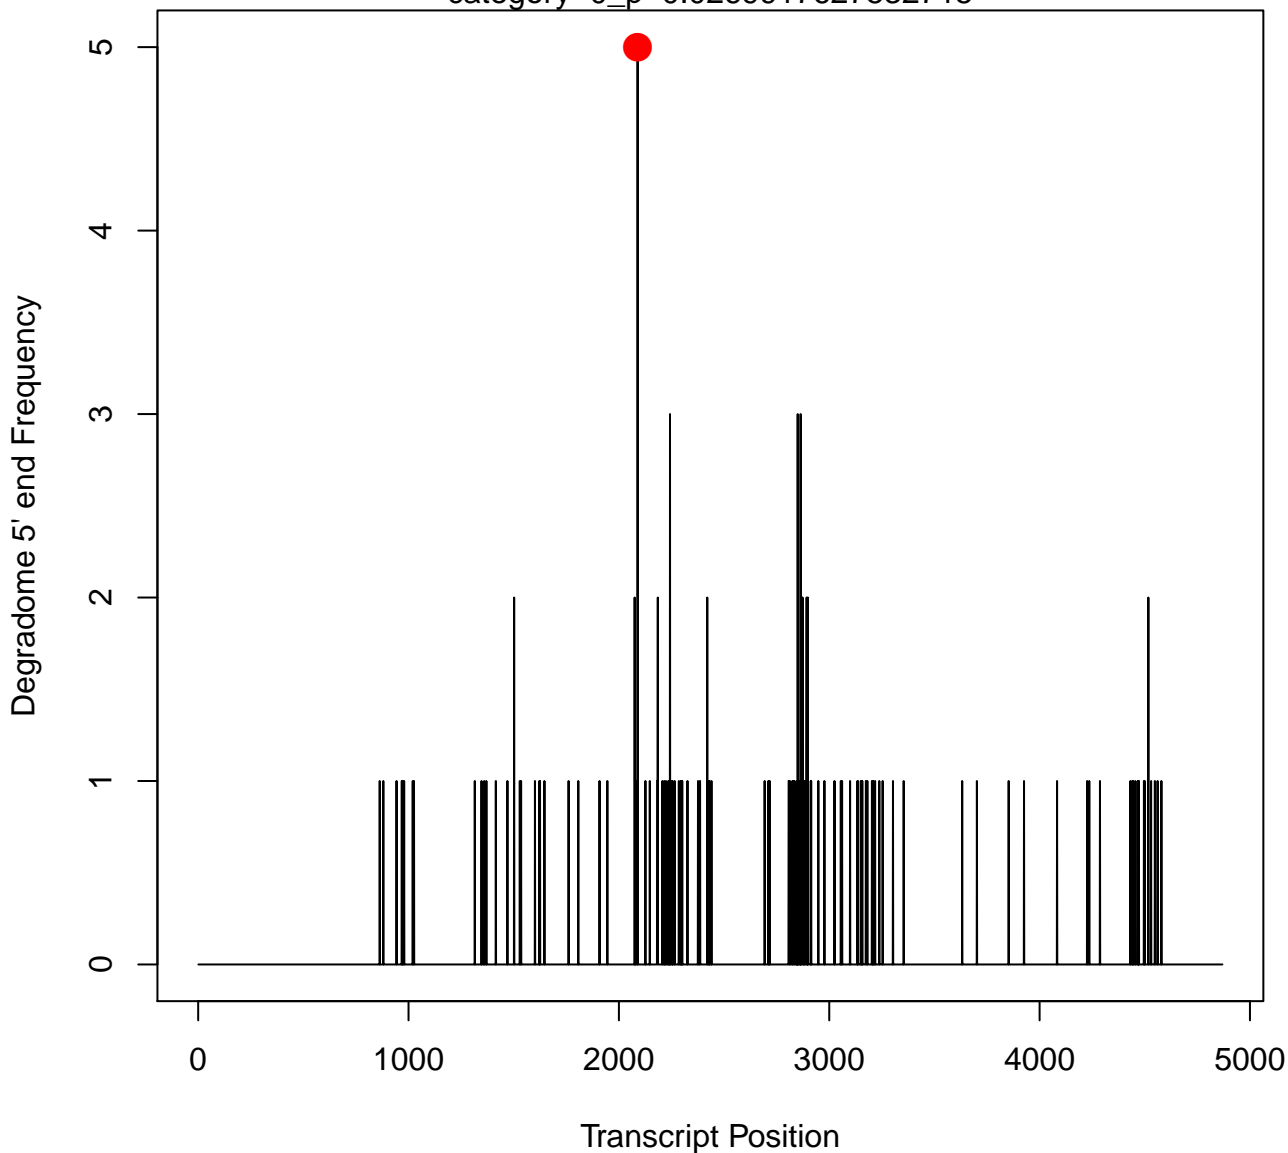

Supplement: s1 [file s1]

**T=Cluster-18410.72936\_Q=novel\_14\_S=1423**

category=0\_p=0.00355083585007077

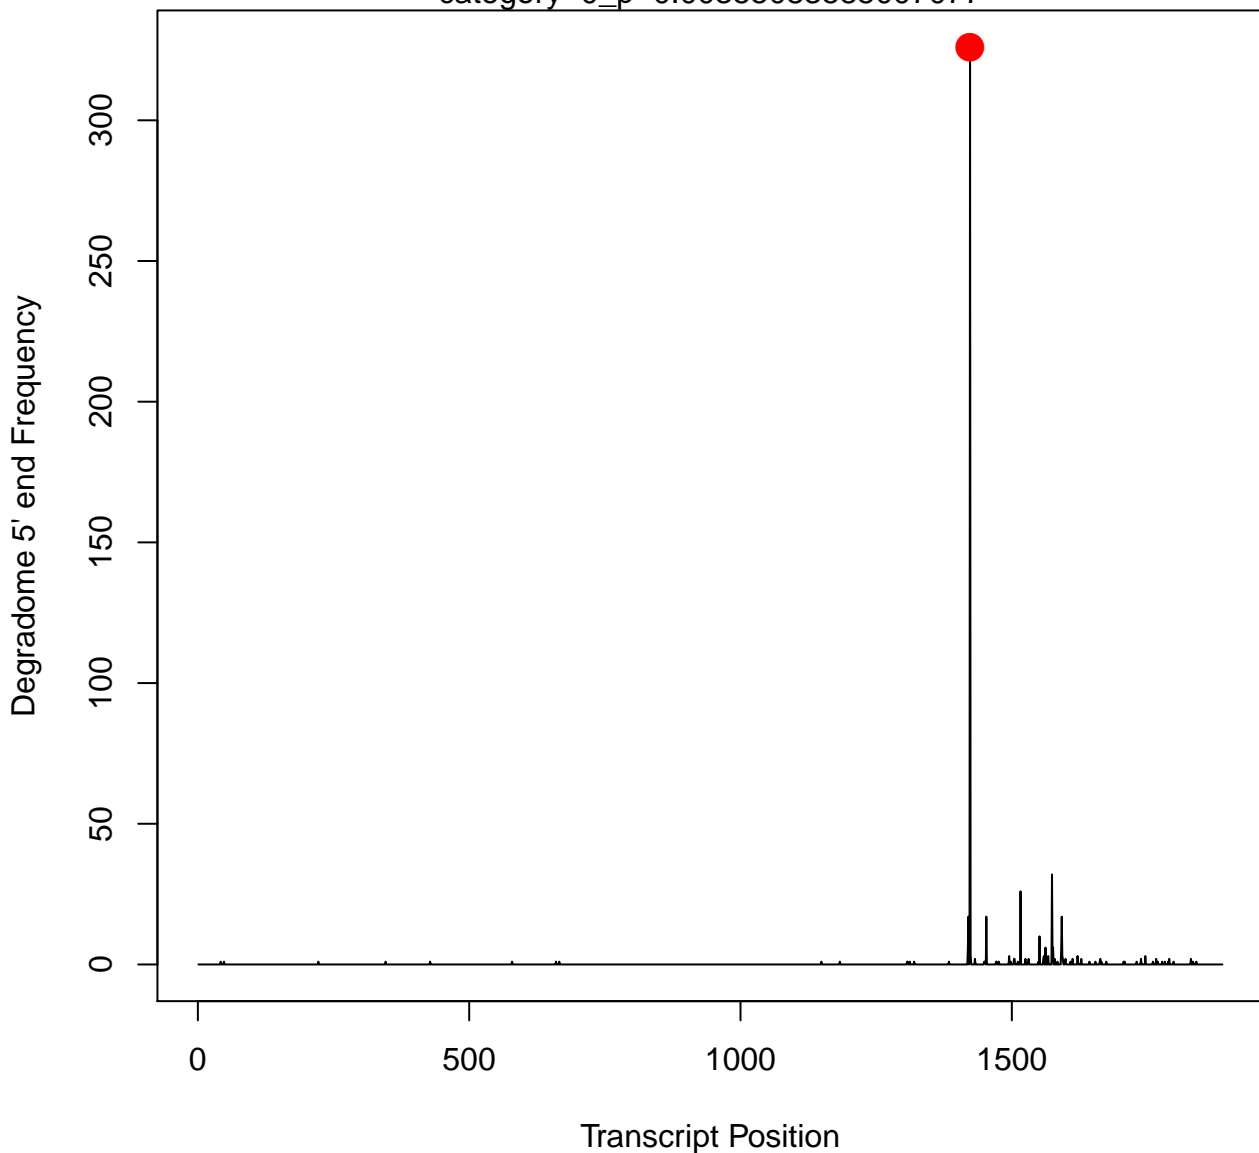

Supplement: s1 [file s1]

**T=Cluster-18410.5771\_Q=novel\_173\_S=323**

category=4\_p=0.0483072886549676

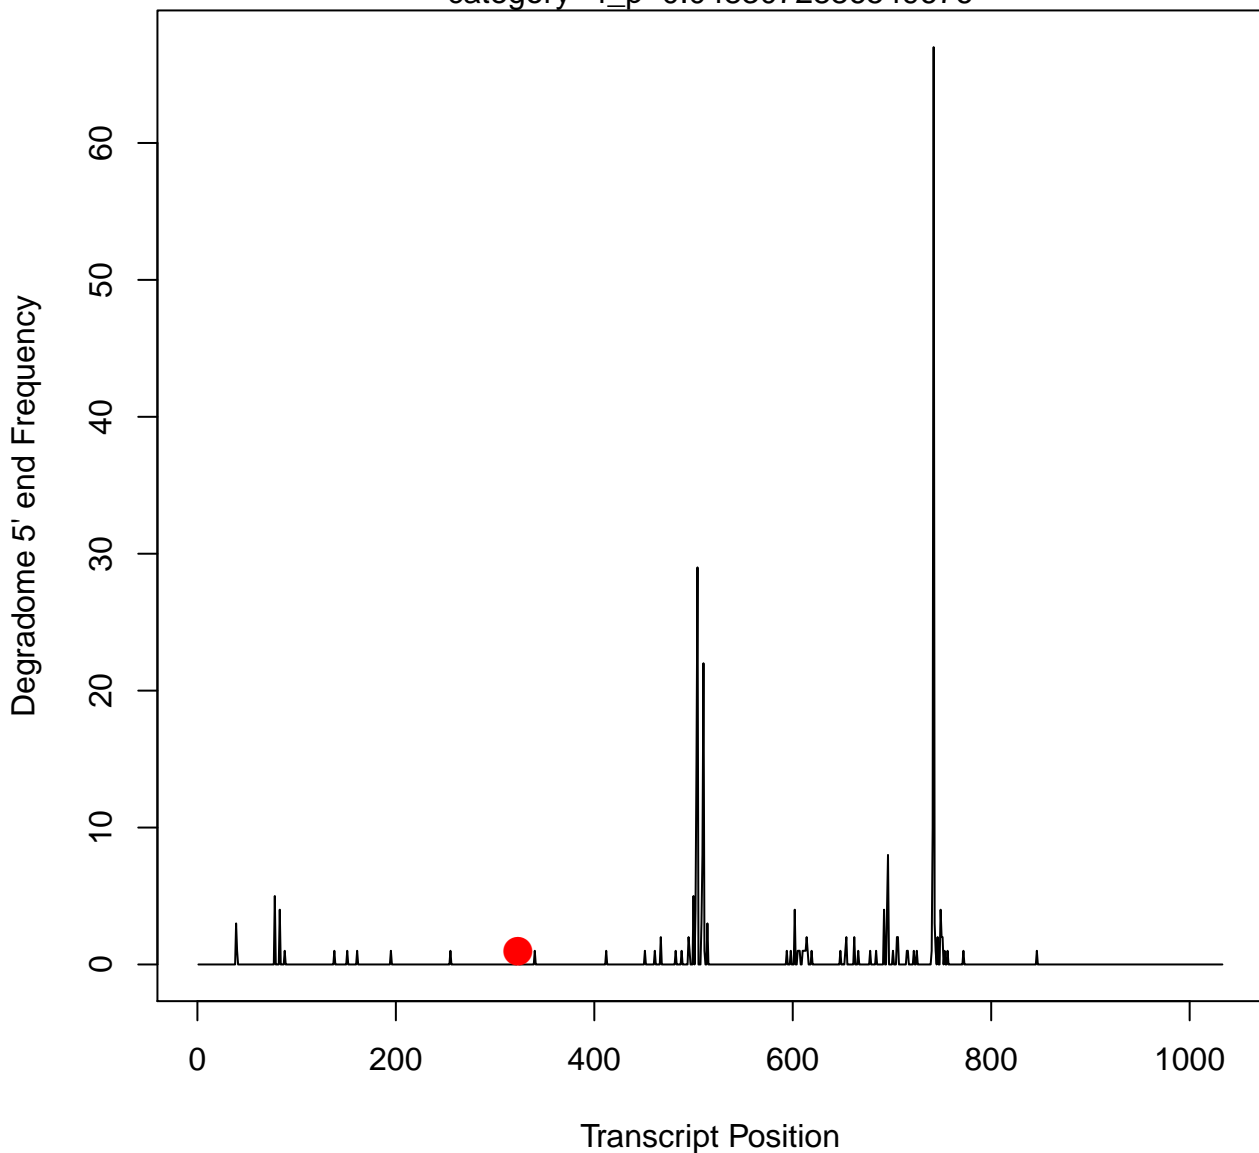

Supplement: s1 [file s1]

**T=Cluster-18410.34041\_Q=novel\_4\_S=299**

category=2\_p=0.0229647072699788

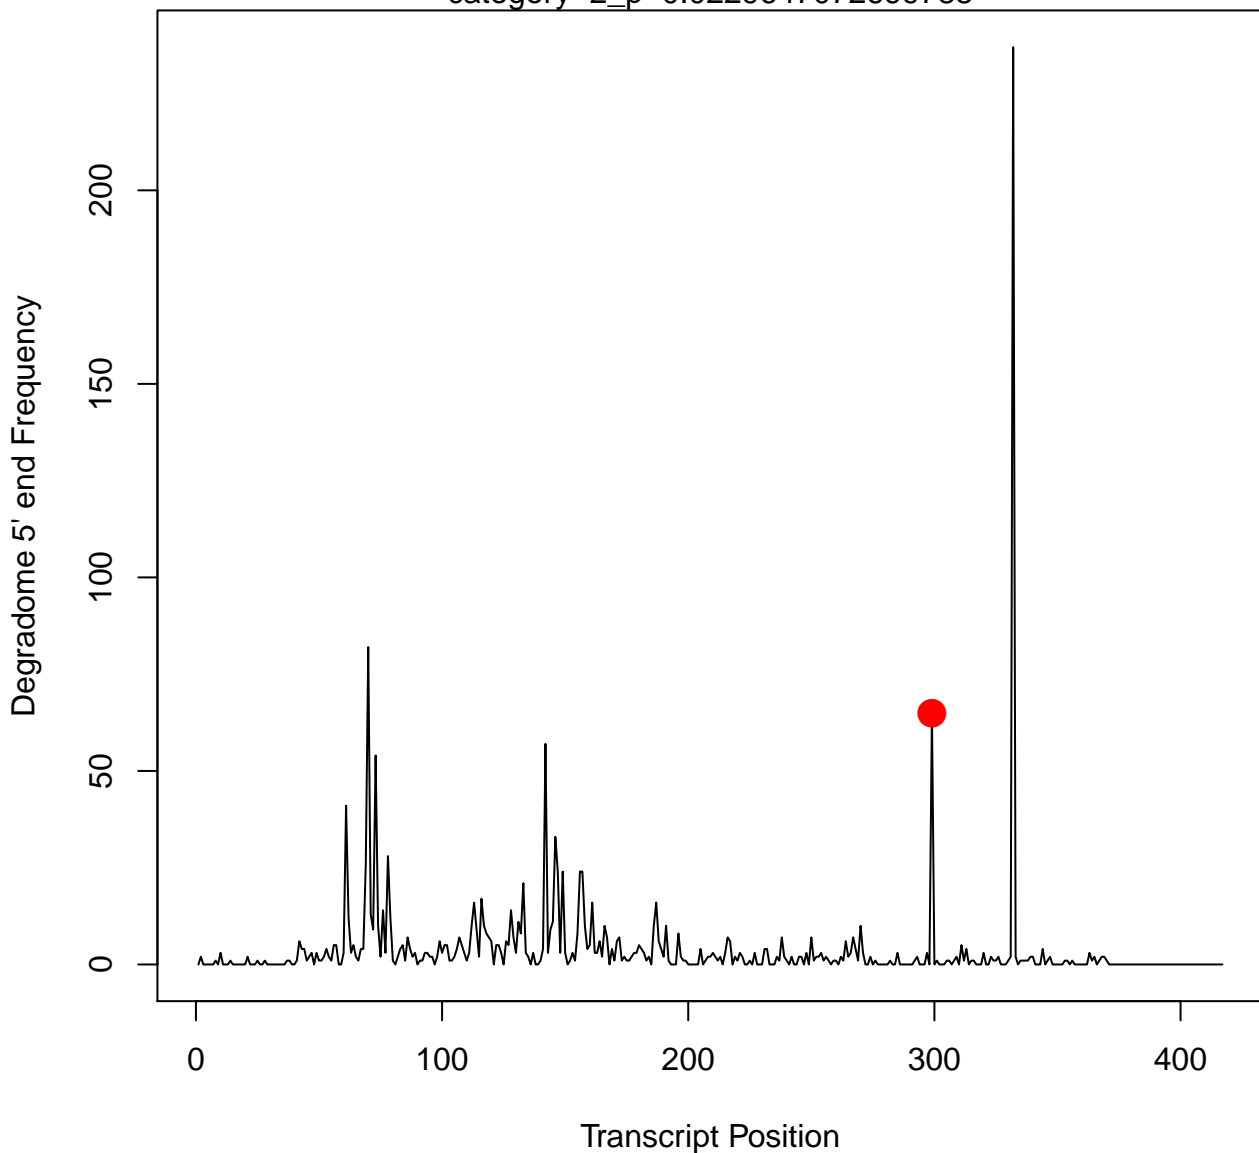

Supplement: s1 [file s1]

**T=Cluster-18410.106871\_Q=novel\_80\_S=308**

category=0\_p=0.0261927099542092

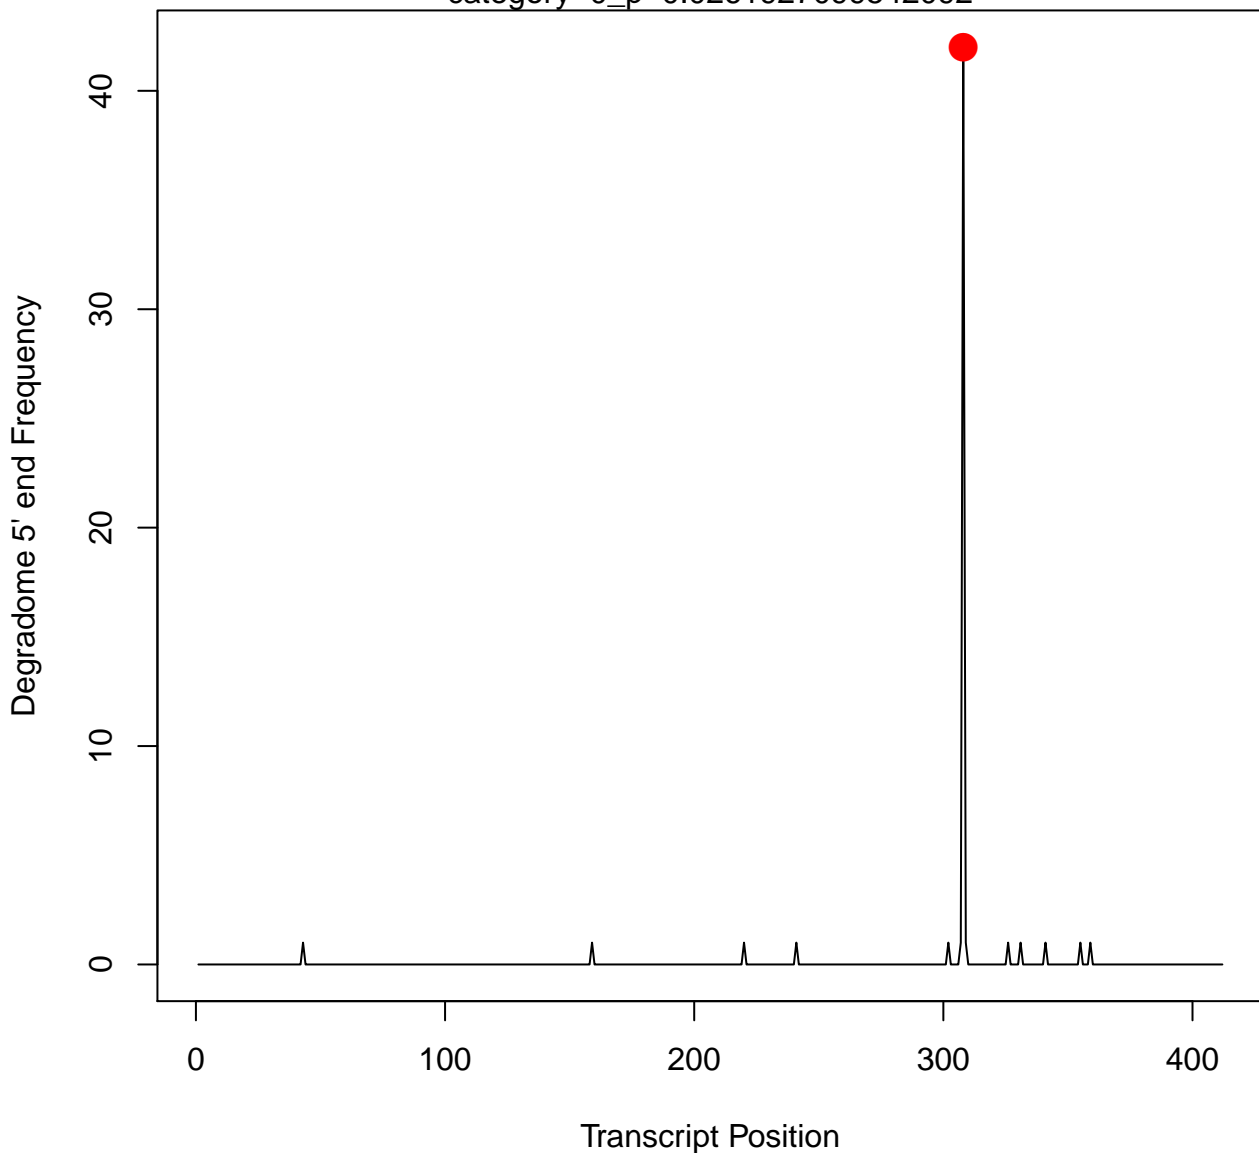

Supplement: s1 [file s1]

**T=Cluster-18410.5139\_Q=novel\_82\_S=26**

category=0\_p=0.00245961596621247

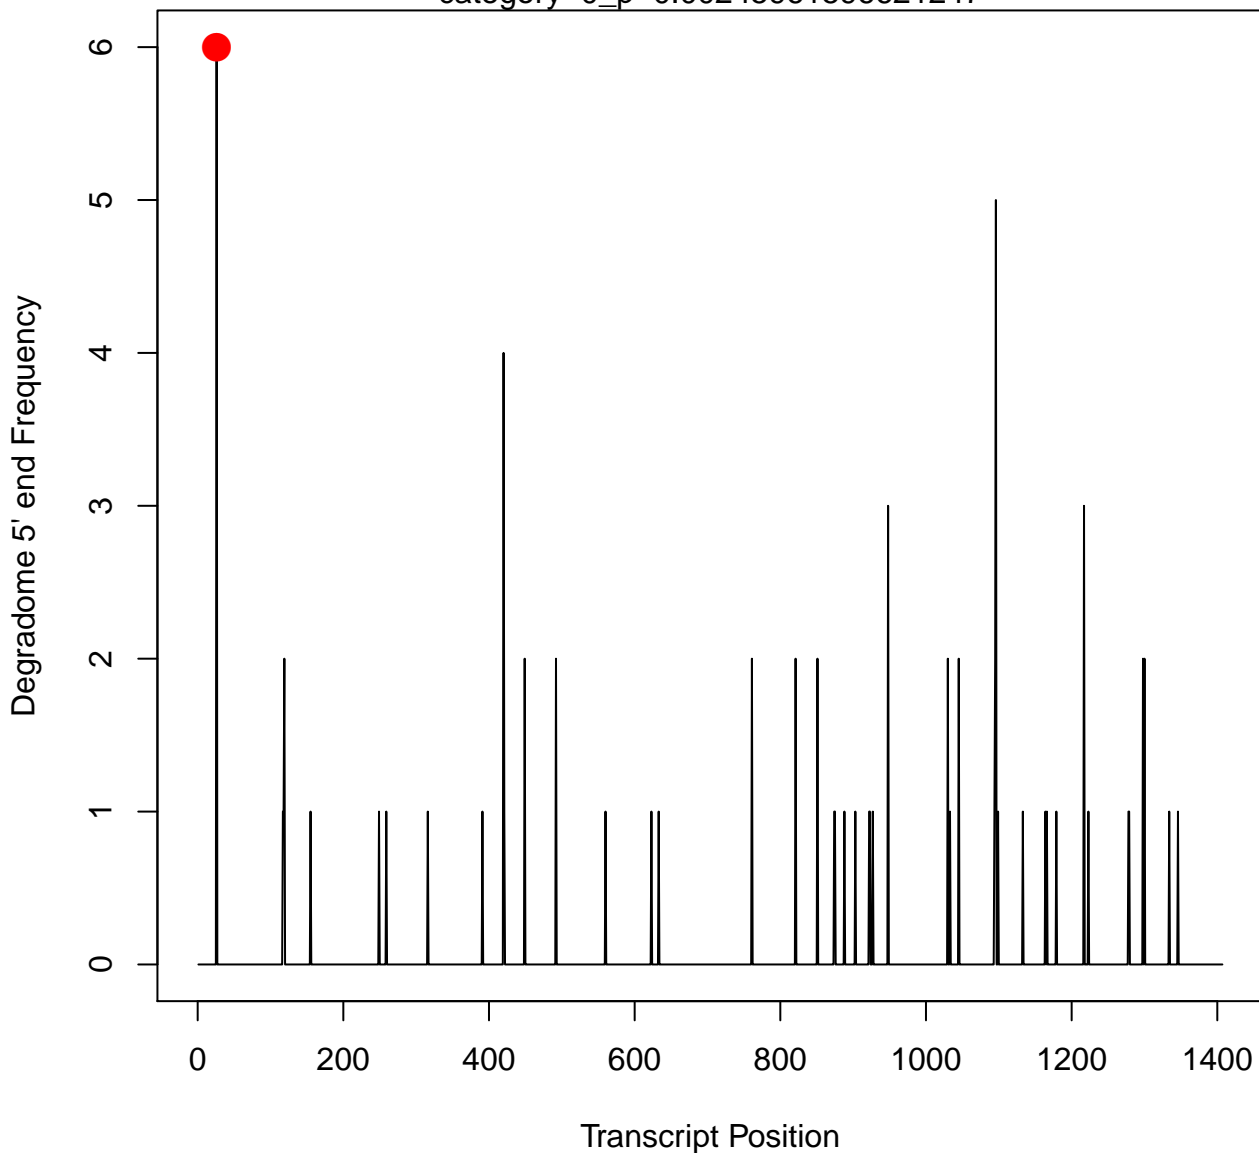

Supplement: s1 [file s1]

**T=Cluster-18410.53264\_Q=novel\_94\_S=405**

category=2\_p=0.0780956144108357

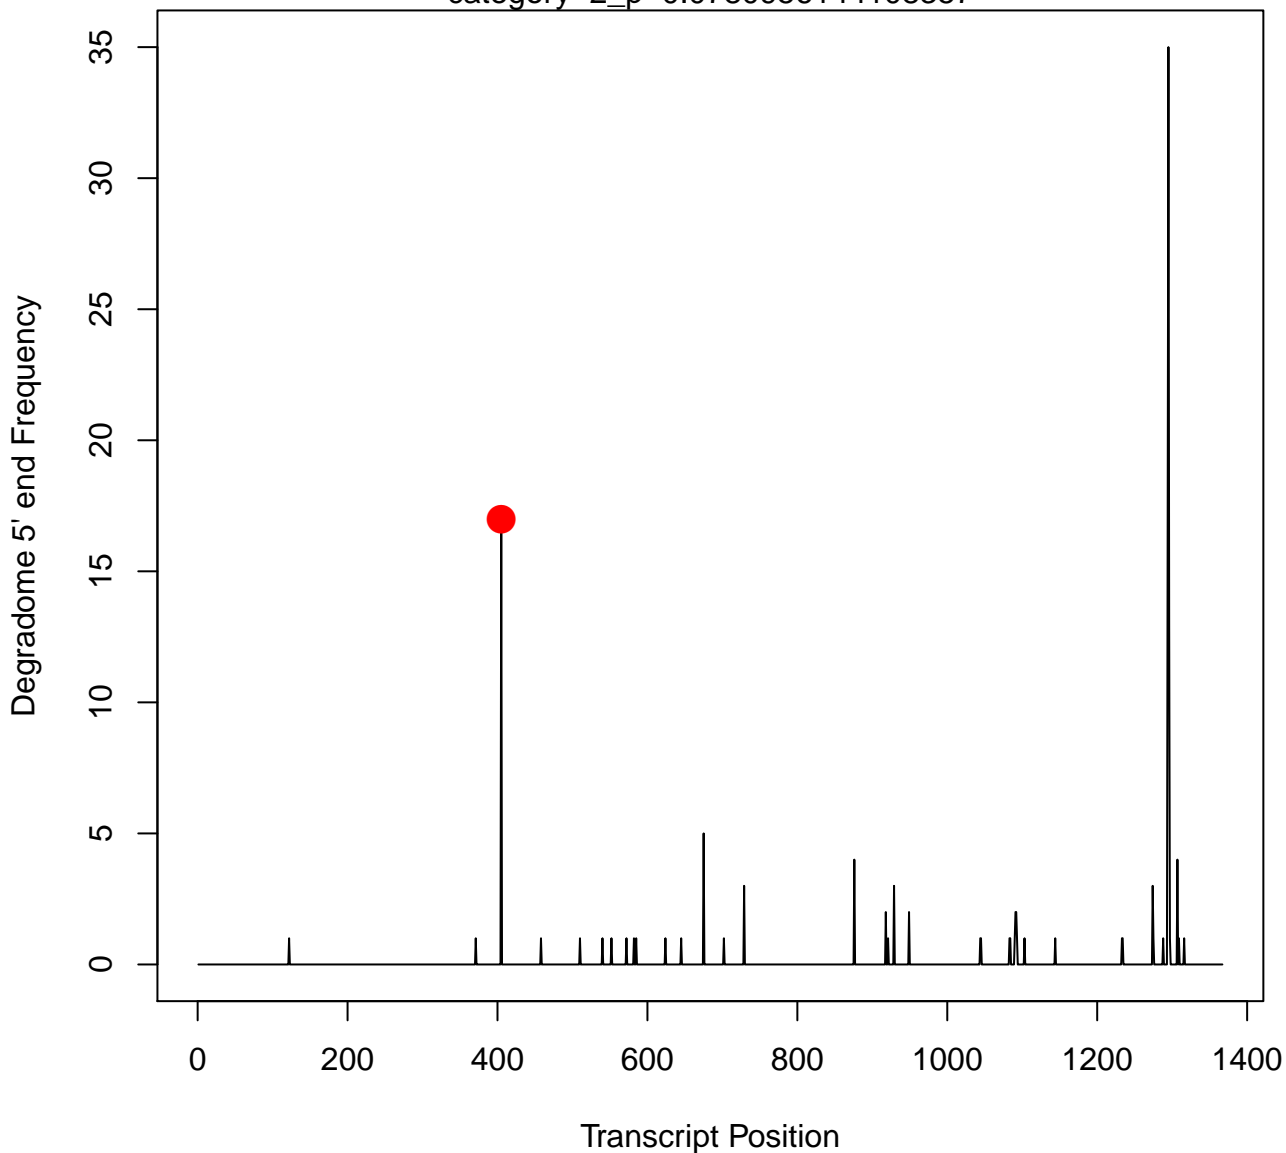

Supplement: s1 [file s1]

**T=Cluster-18410.27940\_Q=novel\_27\_S=309**

category=2\_p=0.0992668787568005

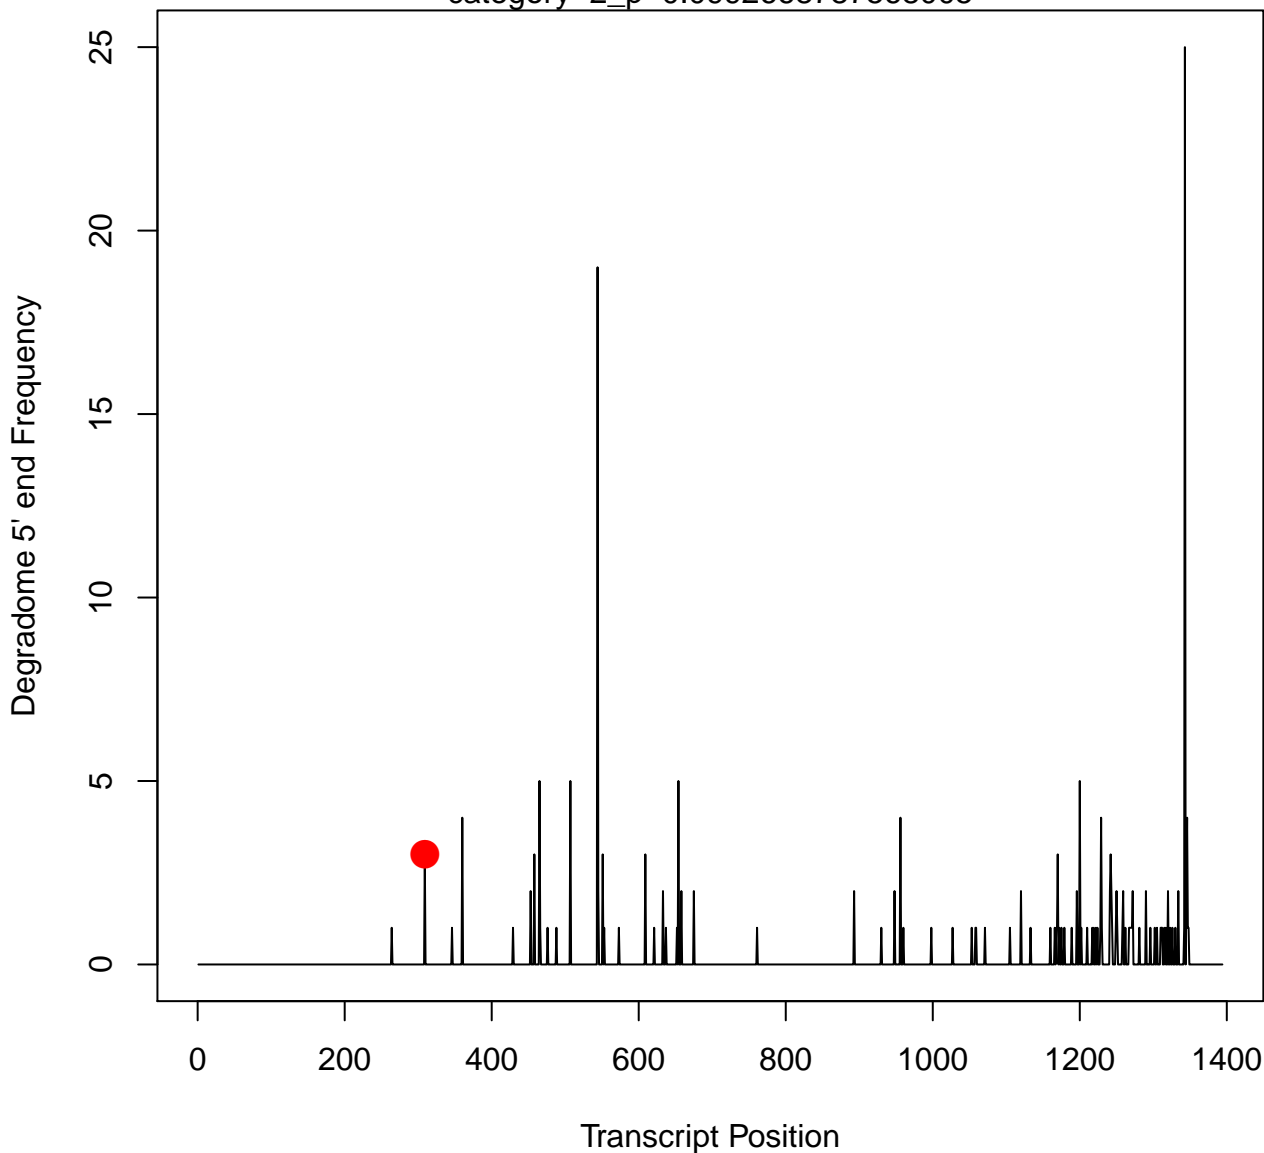

Supplement: s1 [file s1]

**T=Cluster-20177.1\_Q=novel\_2\_S=1471**

category=4\_p=0.0483072886549676

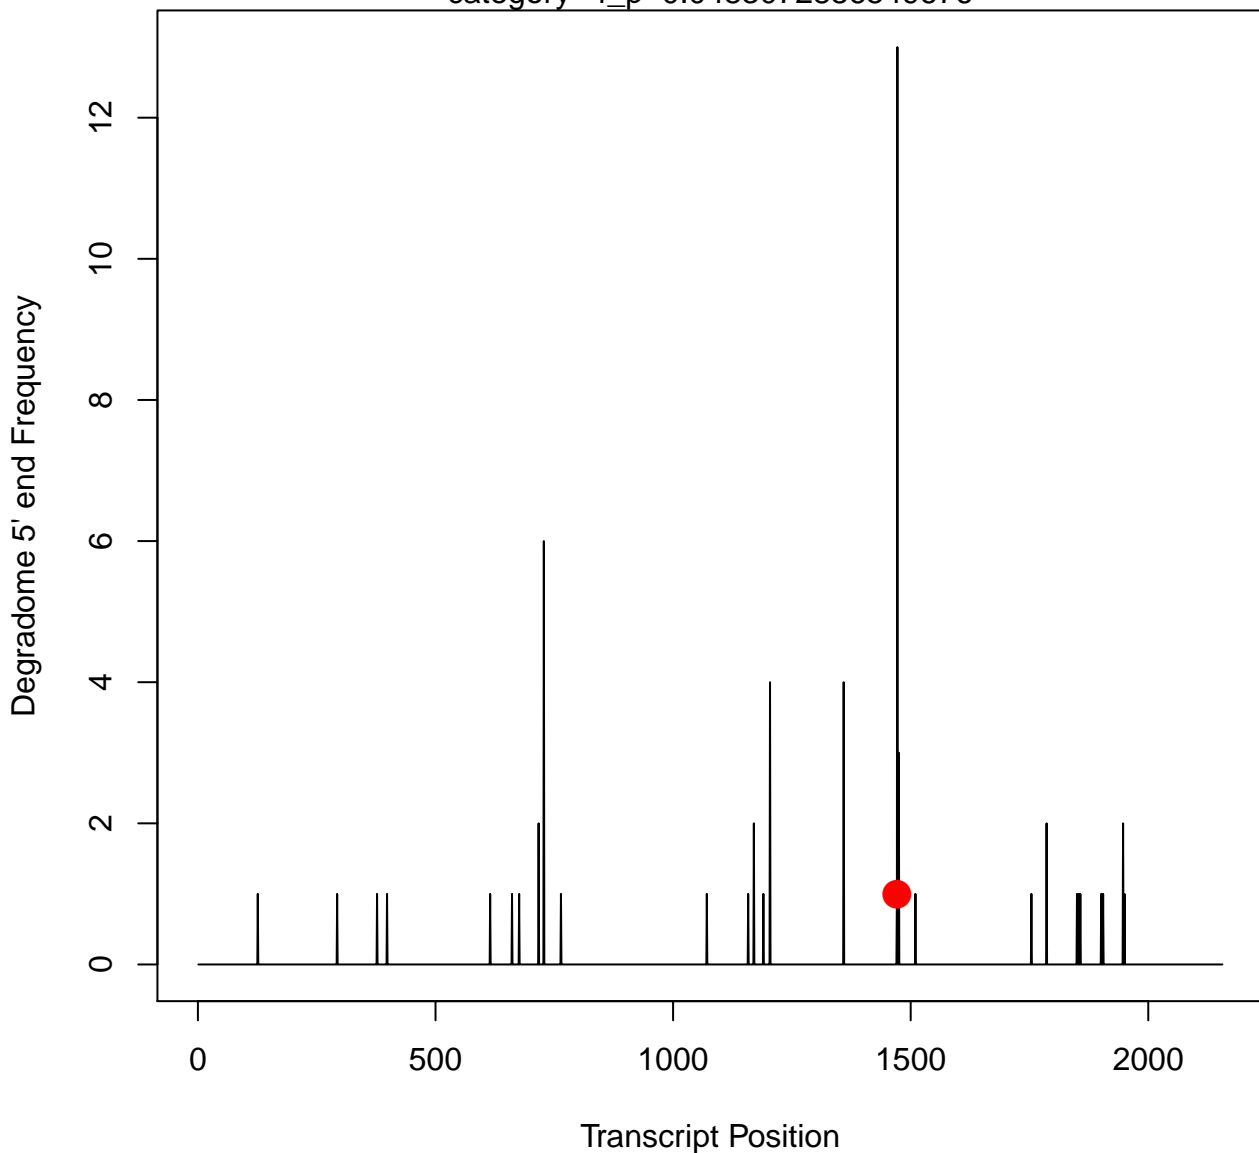

Supplement: s1 [file s1]

**T=Cluster-18410.49113\_Q=novel\_1\_S=283**

category=0\_p=0.0709621018269312

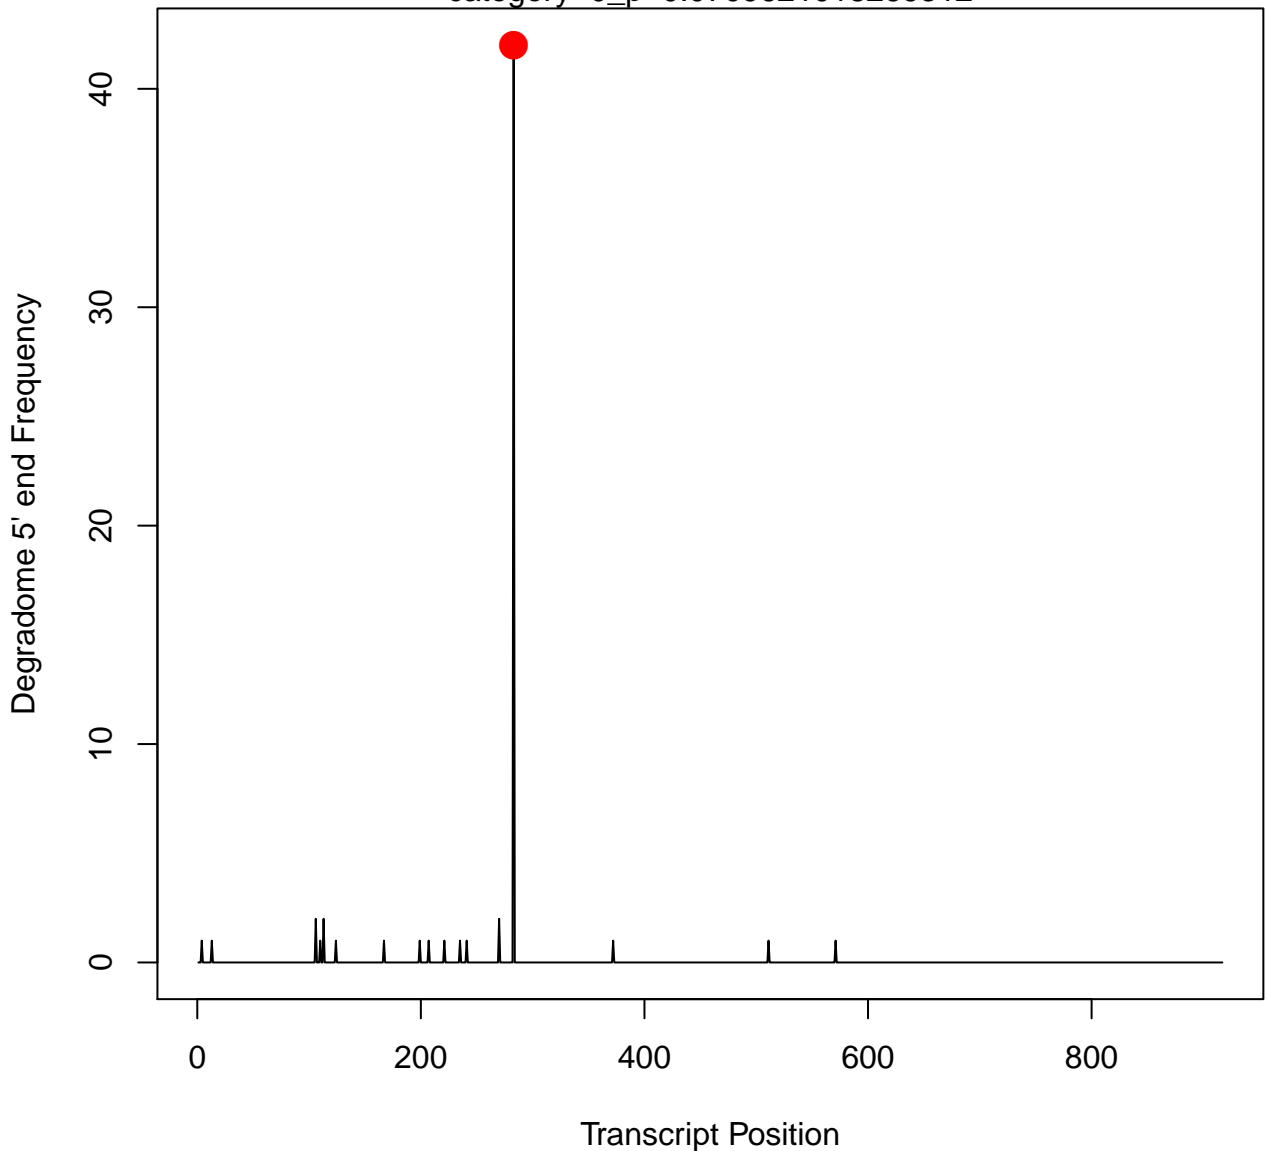

Supplement: s1 [file s1]

**T=Cluster-18410.60884\_Q=novel\_183\_S=446**

category=3\_p=0.0681306920296354

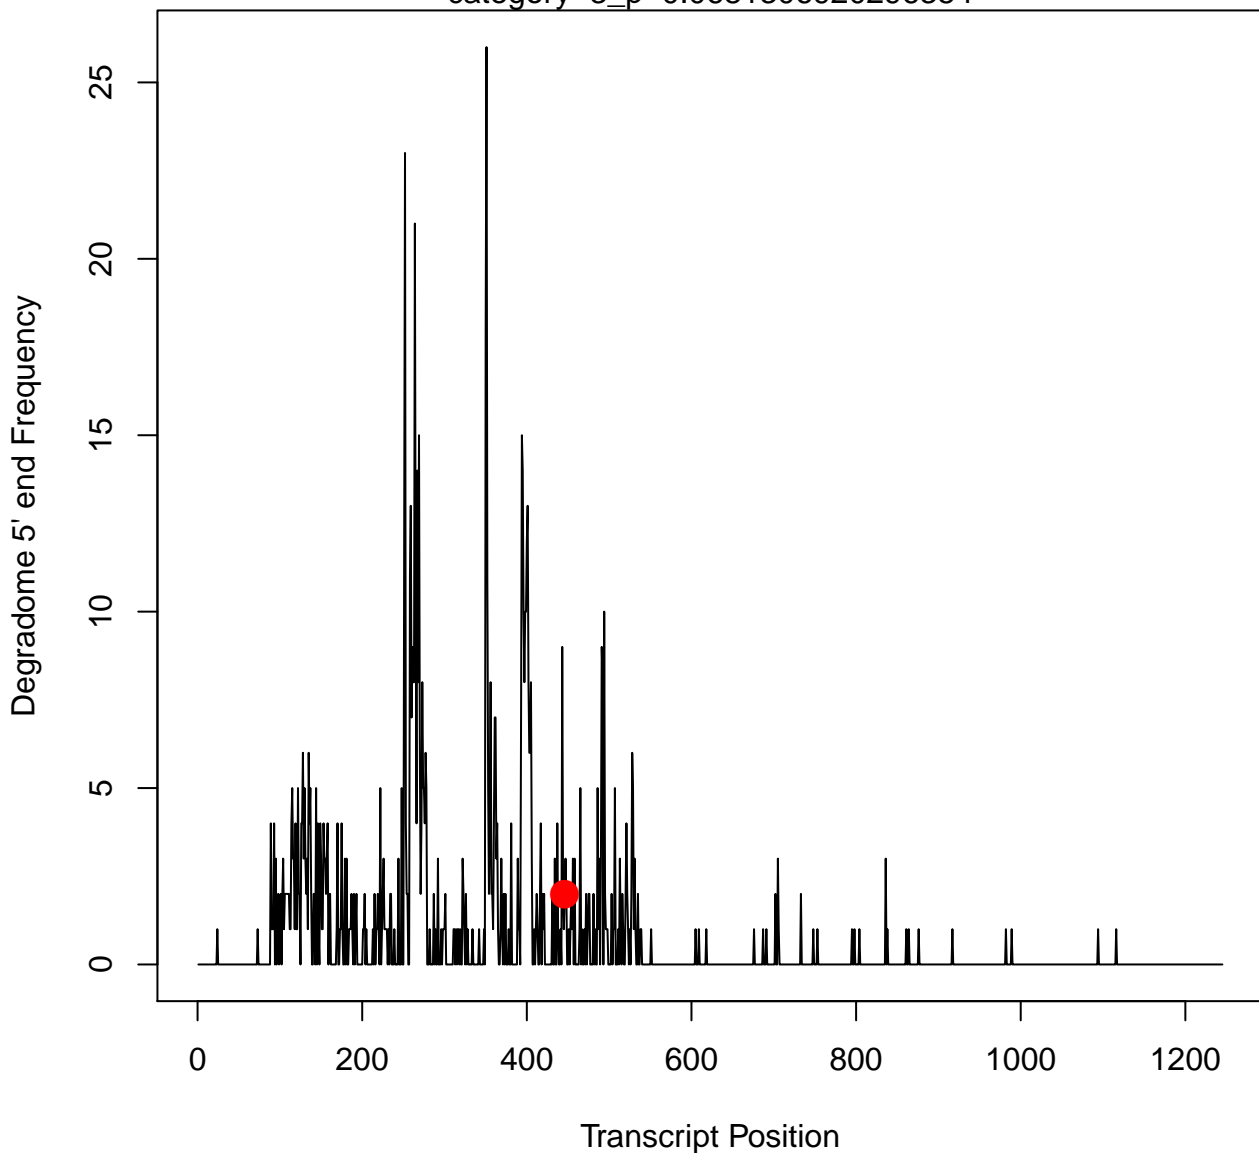

Supplement: s1 [file s1]

**T=Cluster-18410.61716\_Q=novel\_20\_S=1894**

category=0\_p=0.00898905591083365

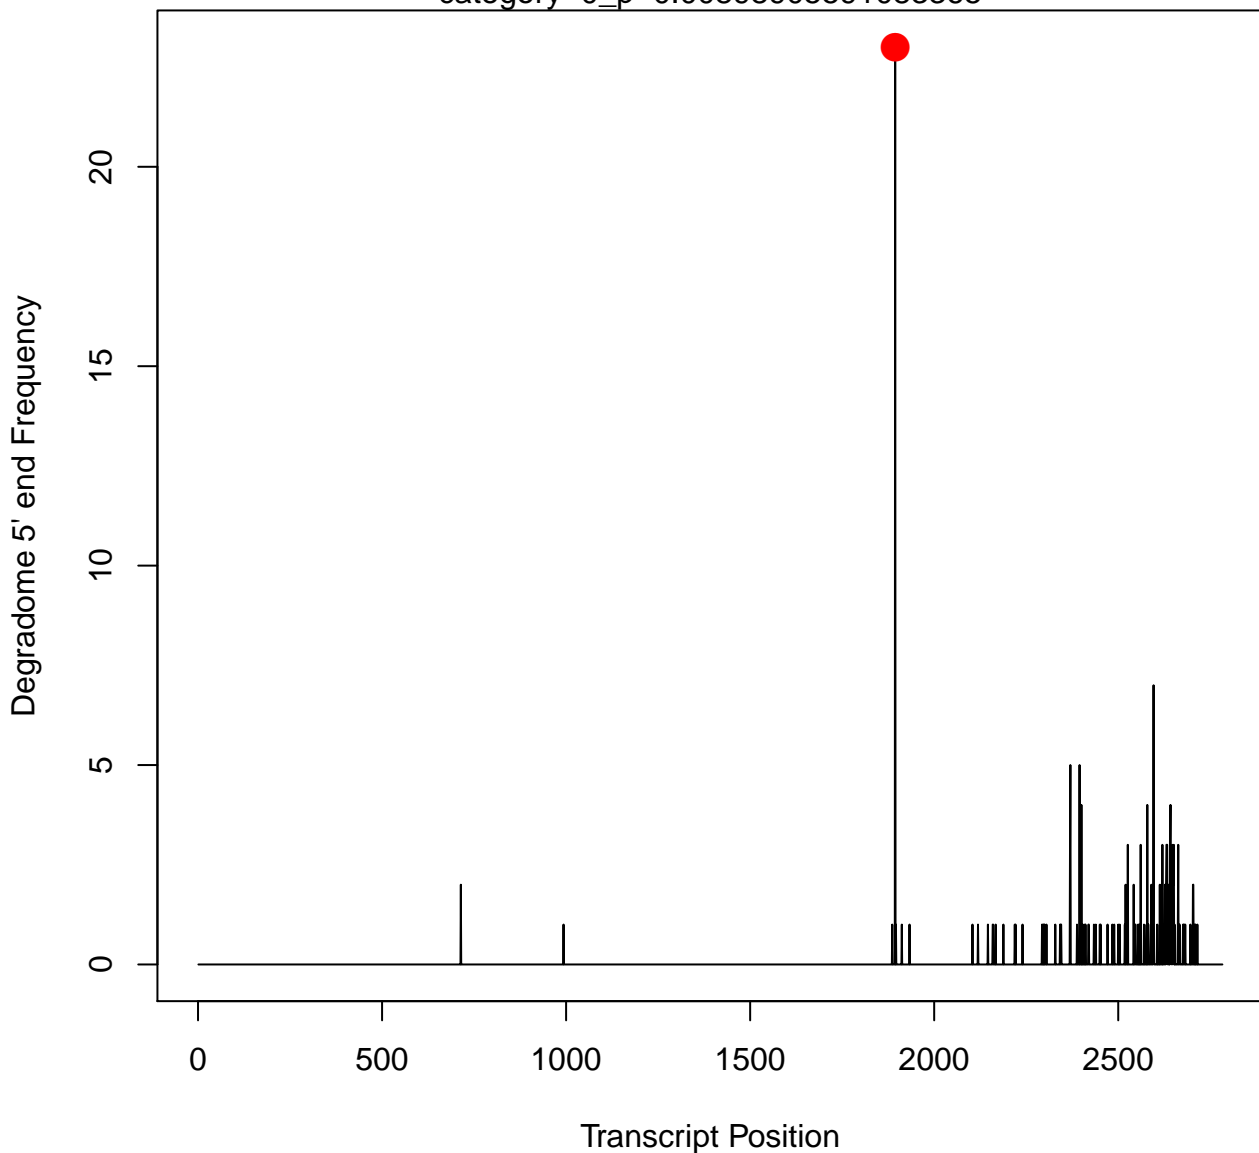

Supplement: s1 [file s1]

**T=Cluster-18410.115144\_Q=pma-miR946a-5p\_S=425**

category=0\_p=0.00355083585007077

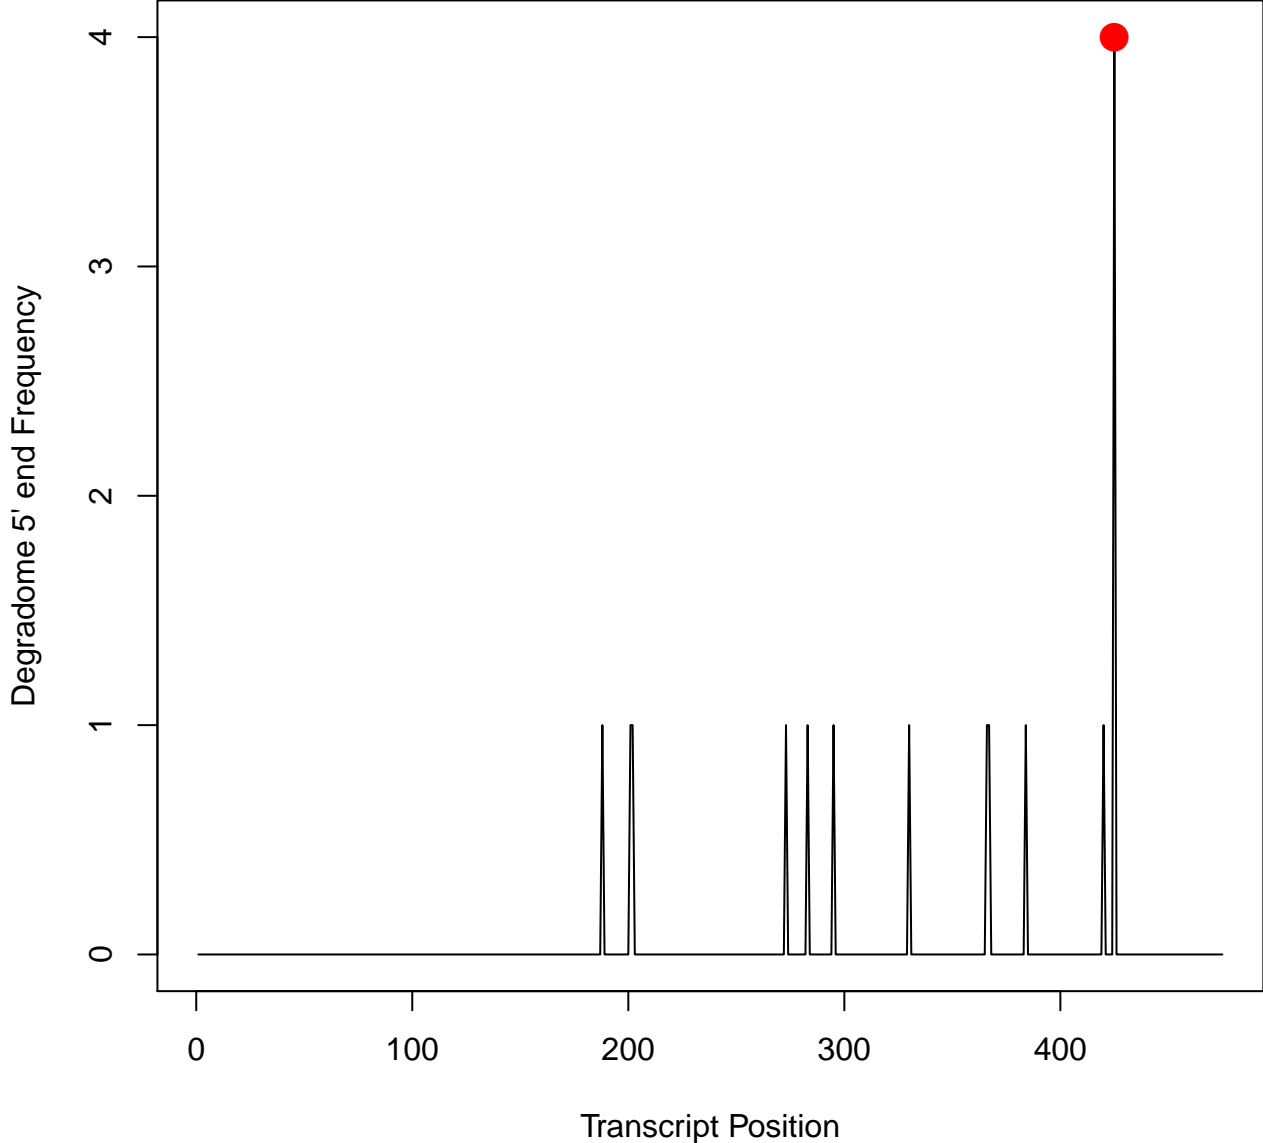

Supplement: s1 [file s1]

**T=Cluster-18410.87000\_Q=novel\_21\_S=185**

category=1\_p=0.0246476865287917

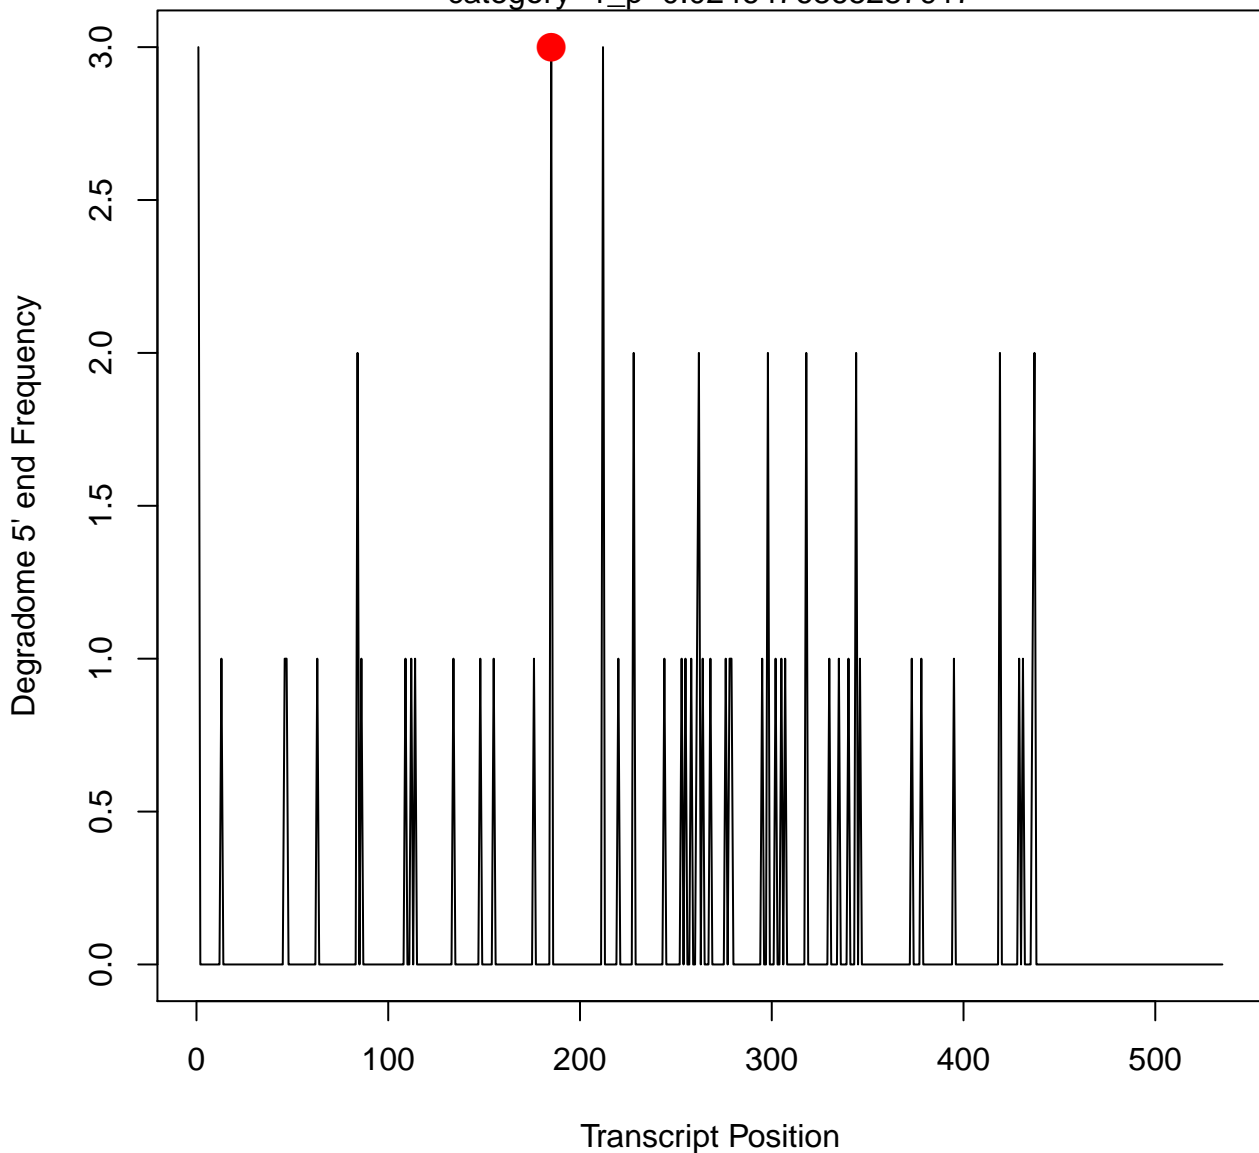

Supplement: s1 [file s1]

**T=Cluster-18410.24593\_Q=novel\_12\_S=575**

category=0\_p=0.0106147270149937

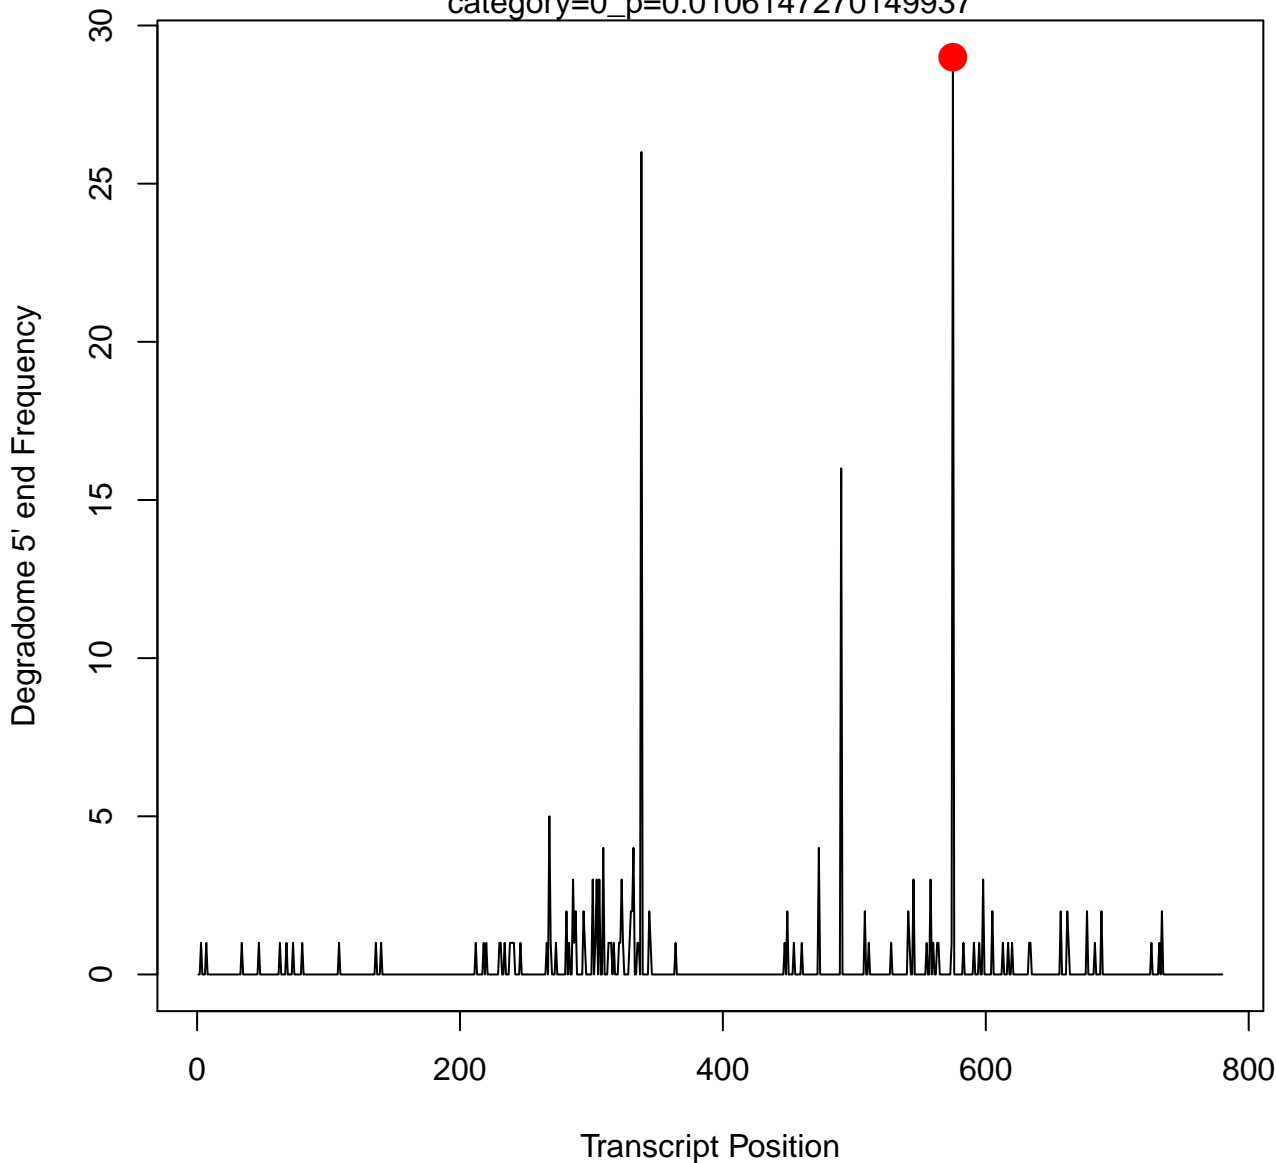

Supplement: s1 [file s1]

**T=Cluster-18410.12161\_Q=novel\_74\_S=825**

category=0\_p=0.00164041690342198

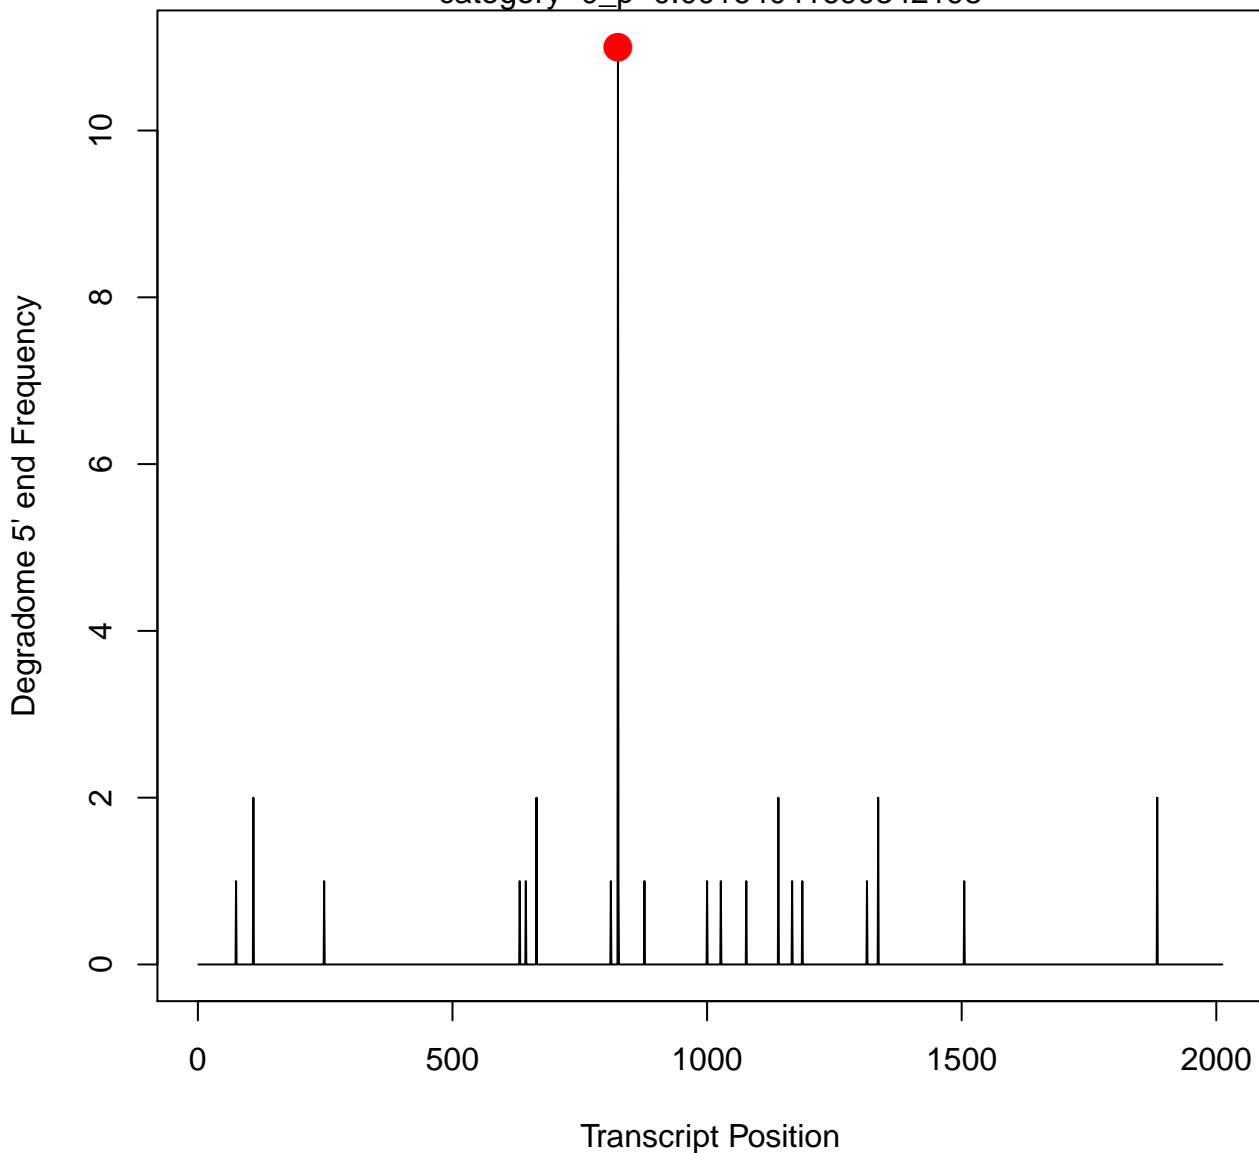

Supplement: s1 [file s1]

**T=Cluster-18410.67249\_Q=novel\_3\_S=311**

category=1\_p=0.04123965647046

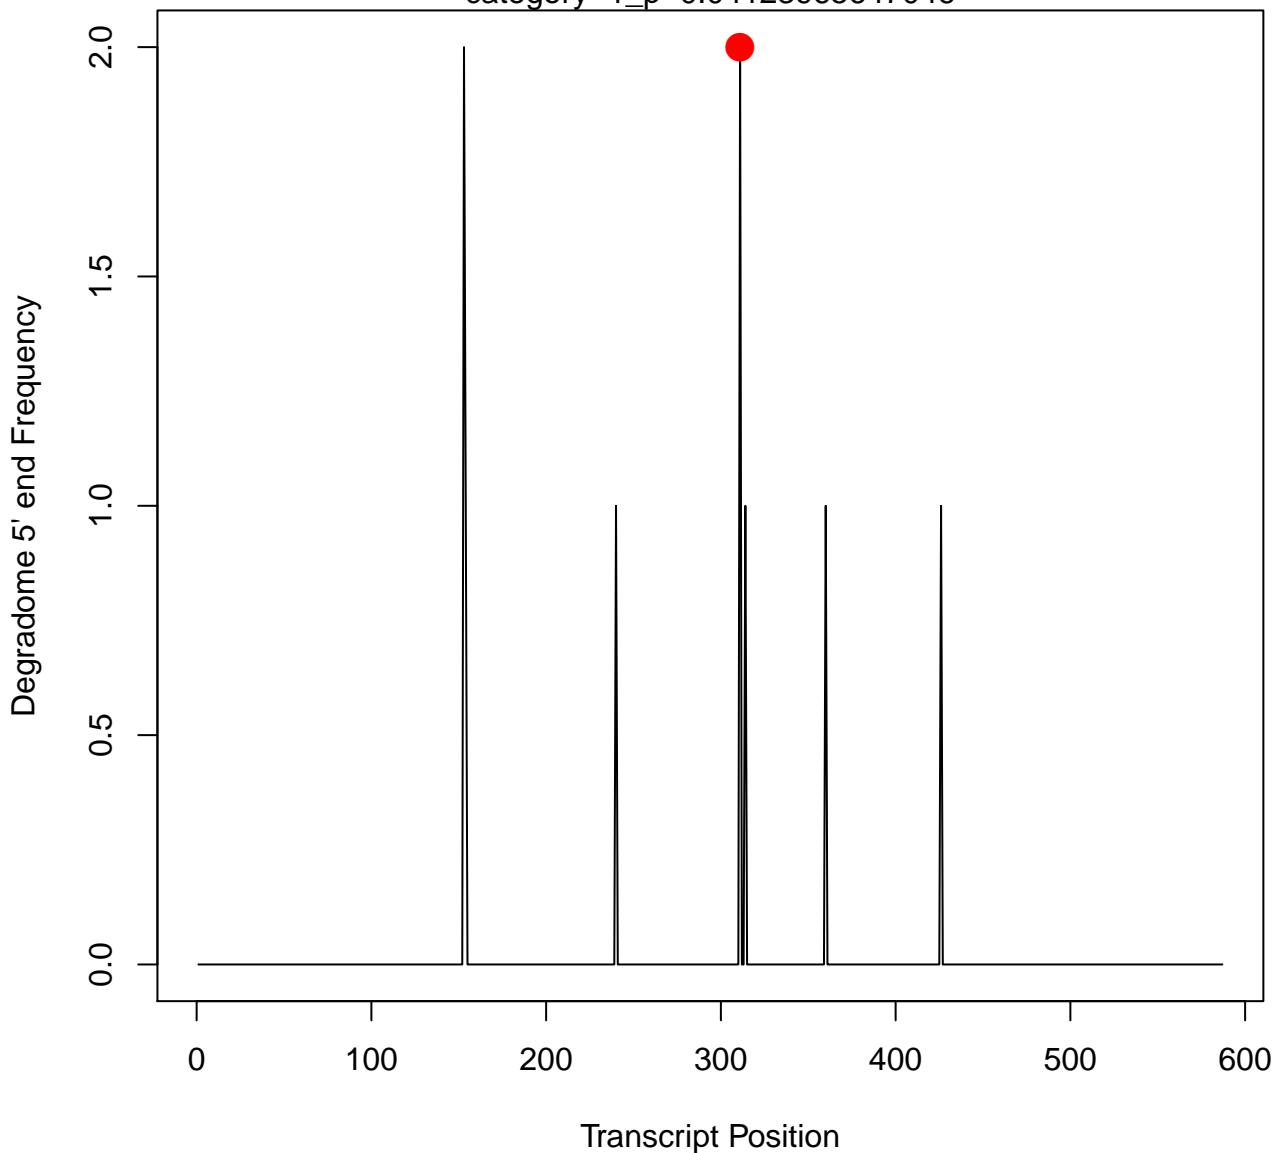

Supplement: s1 [file s1]

**T=Cluster-18410.118398\_Q=pma-miR1312\_S=678**

category=0\_p=0.000547104903662499

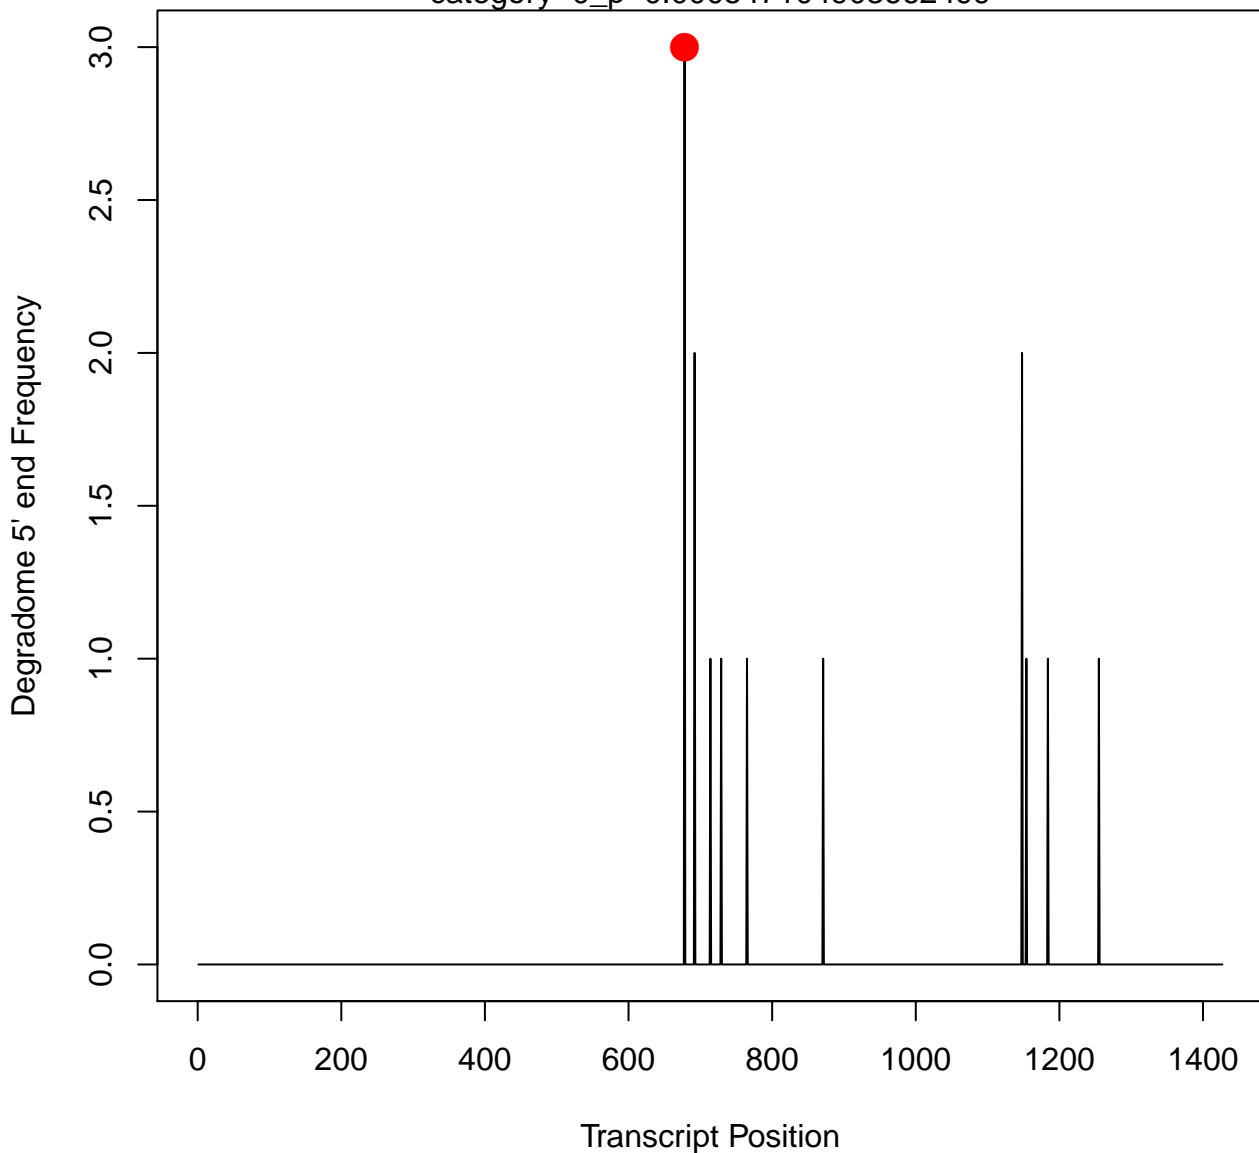

Supplement: s1 [file s1]

**T=Cluster-18410.44119\_Q=novel\_148\_S=198**

category=0\_p=0.0438828951820183

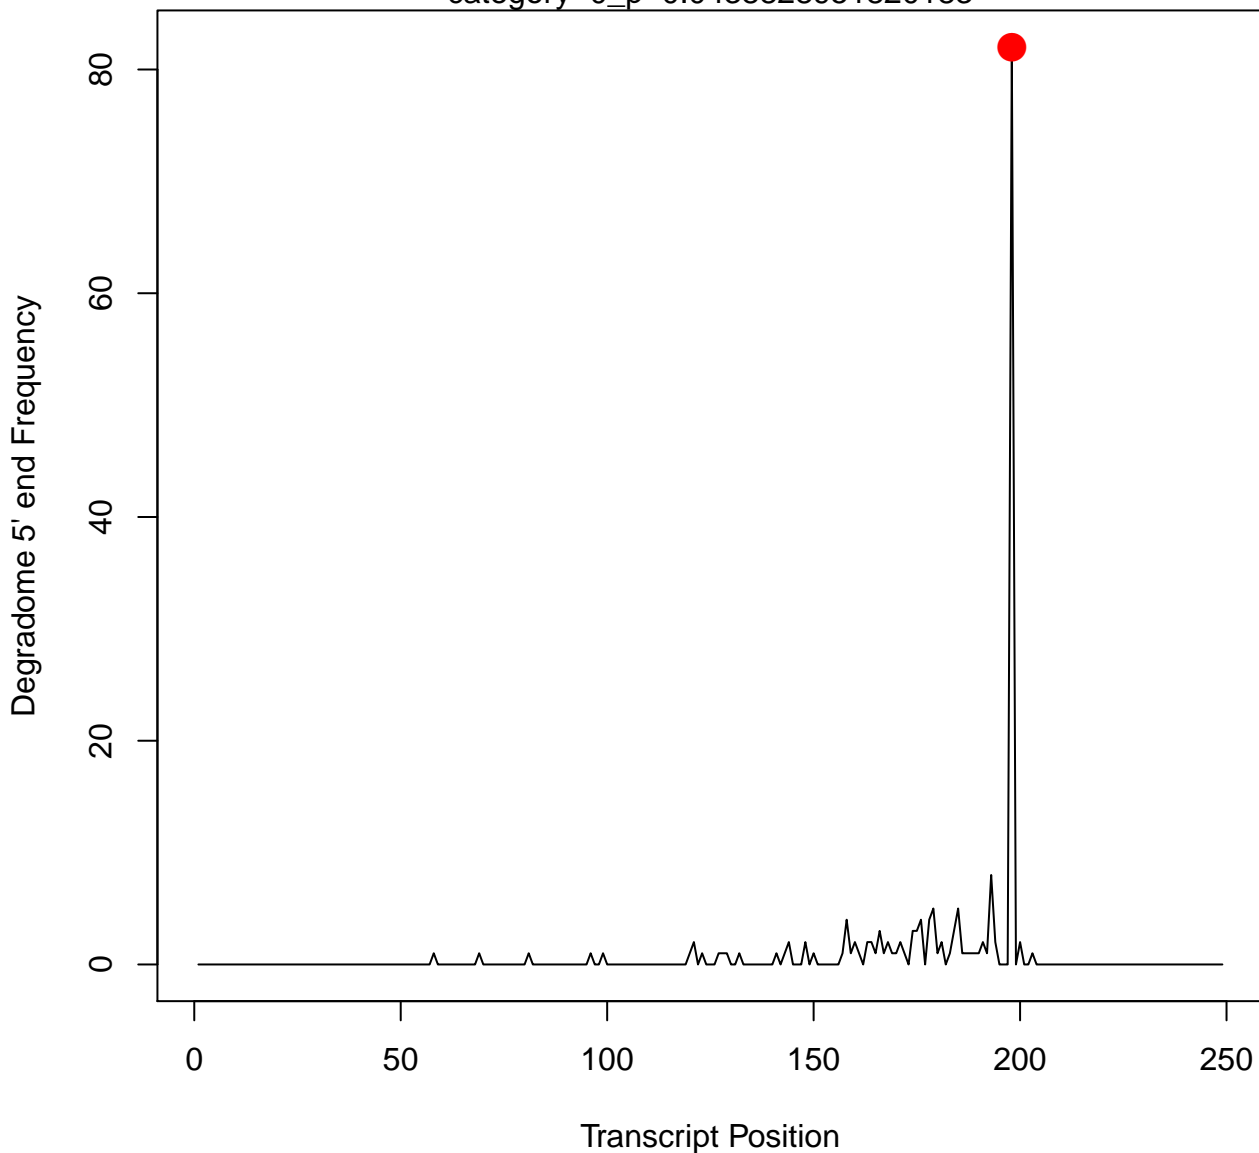

Supplement: s1 [file s1]

**T=Cluster-18410.32754\_Q=novel\_46\_S=741**

category=0\_p=0.00491318222172366

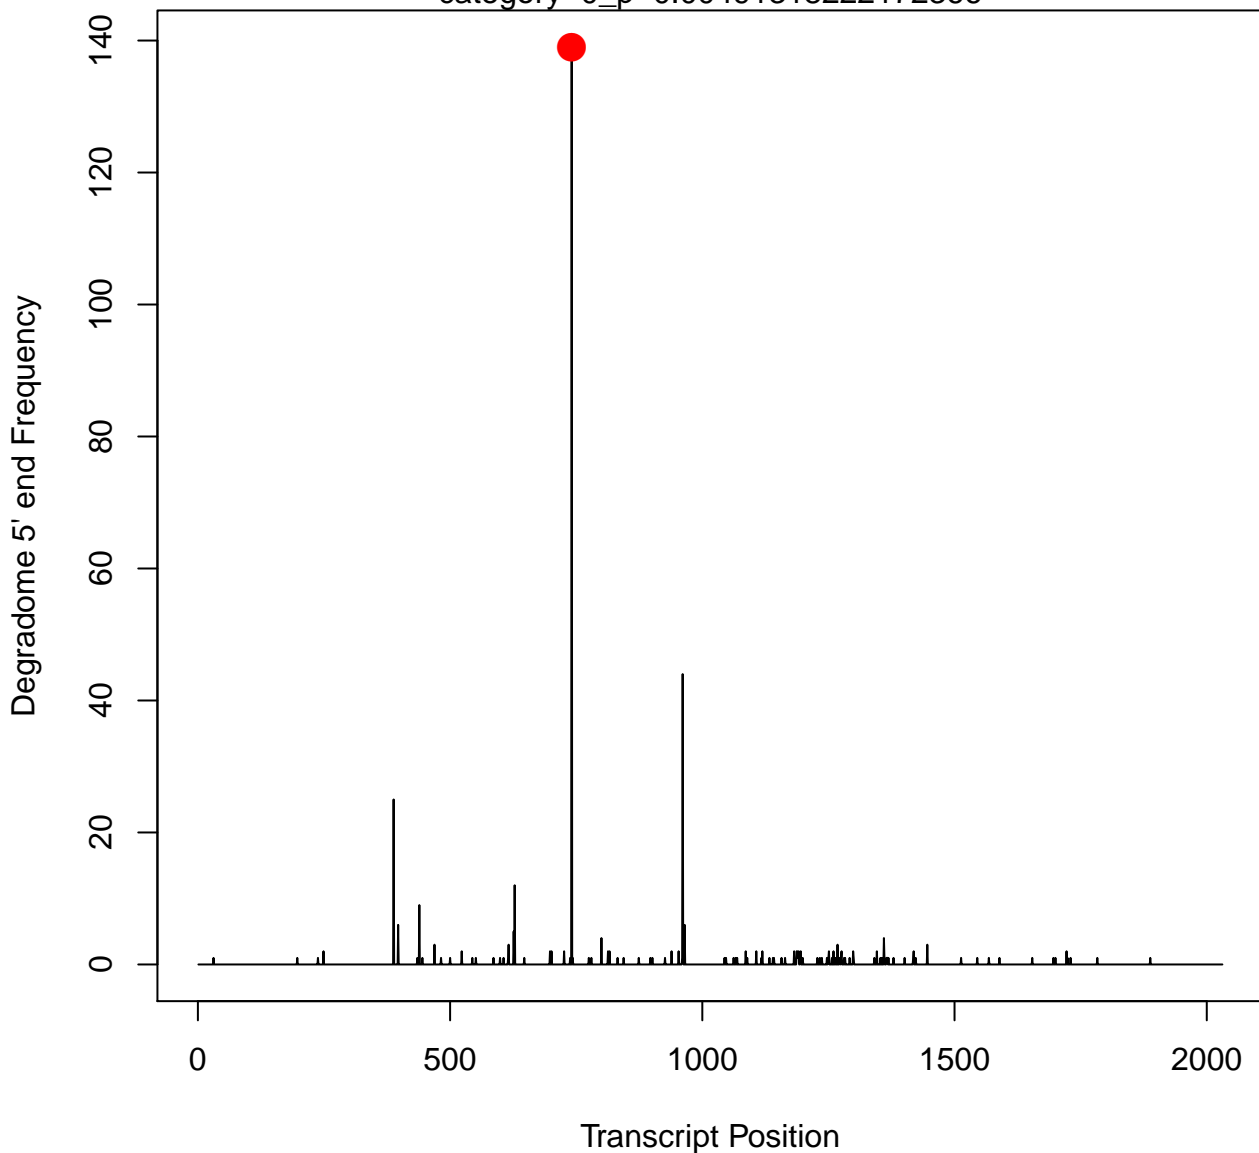

Supplement: s1 [file s1]

**T=Cluster-9830.0\_Q=pma-miR951\_S=298**

category=0\_p=0.0125079730989179

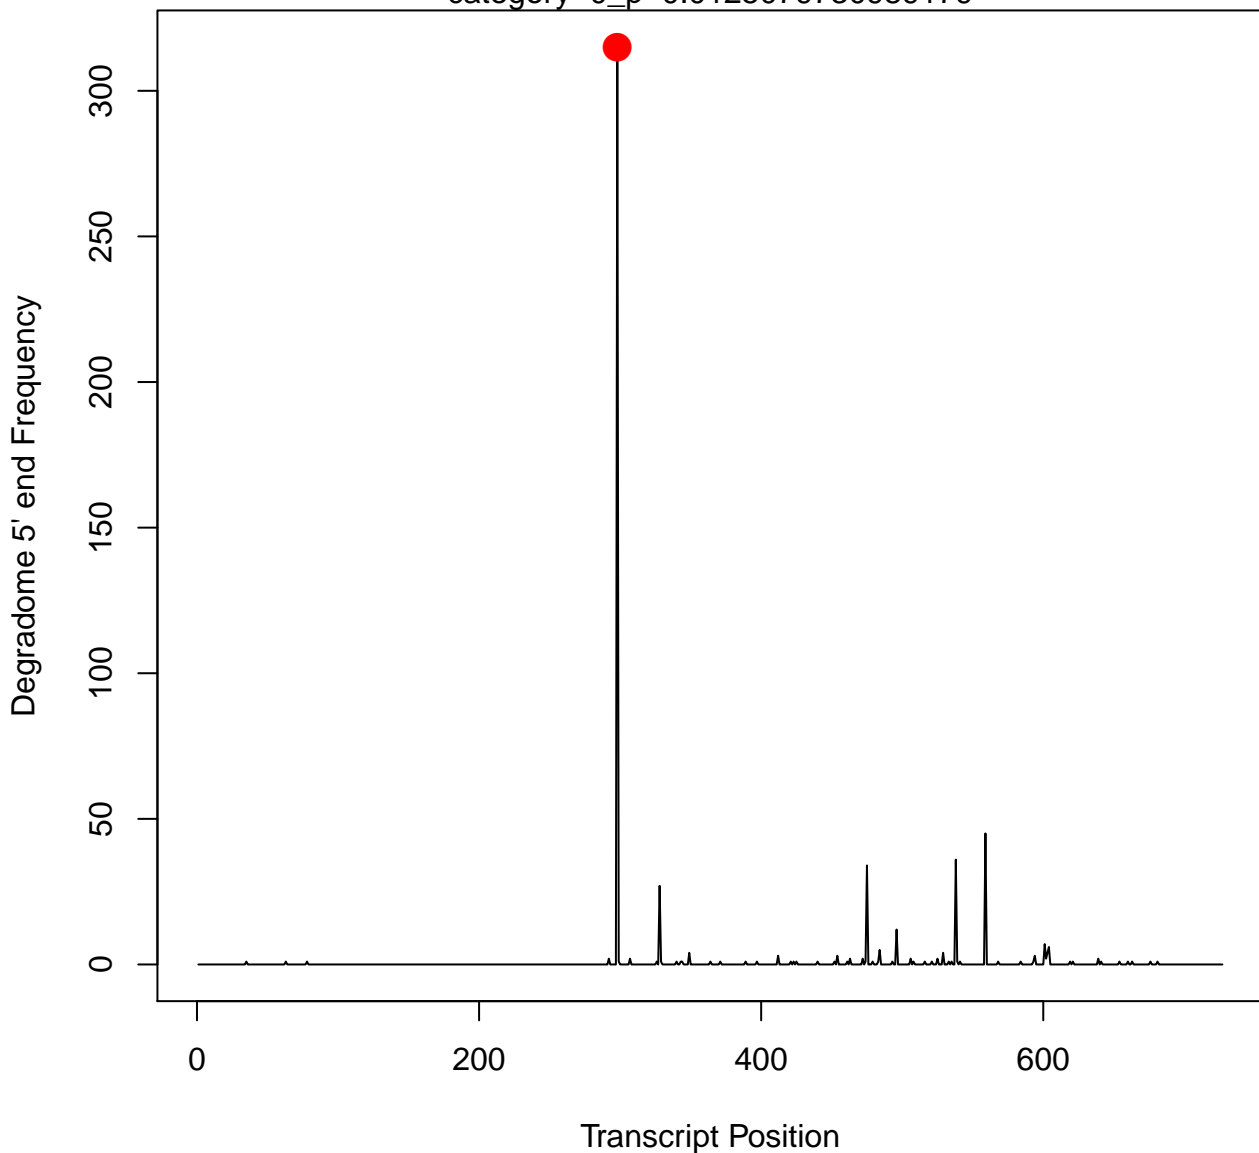

Supplement: s1 [file s1]

**T=Cluster-18410.68767\_Q=pma-miR949\_S=127**

category=0\_p=0.00871785114912016

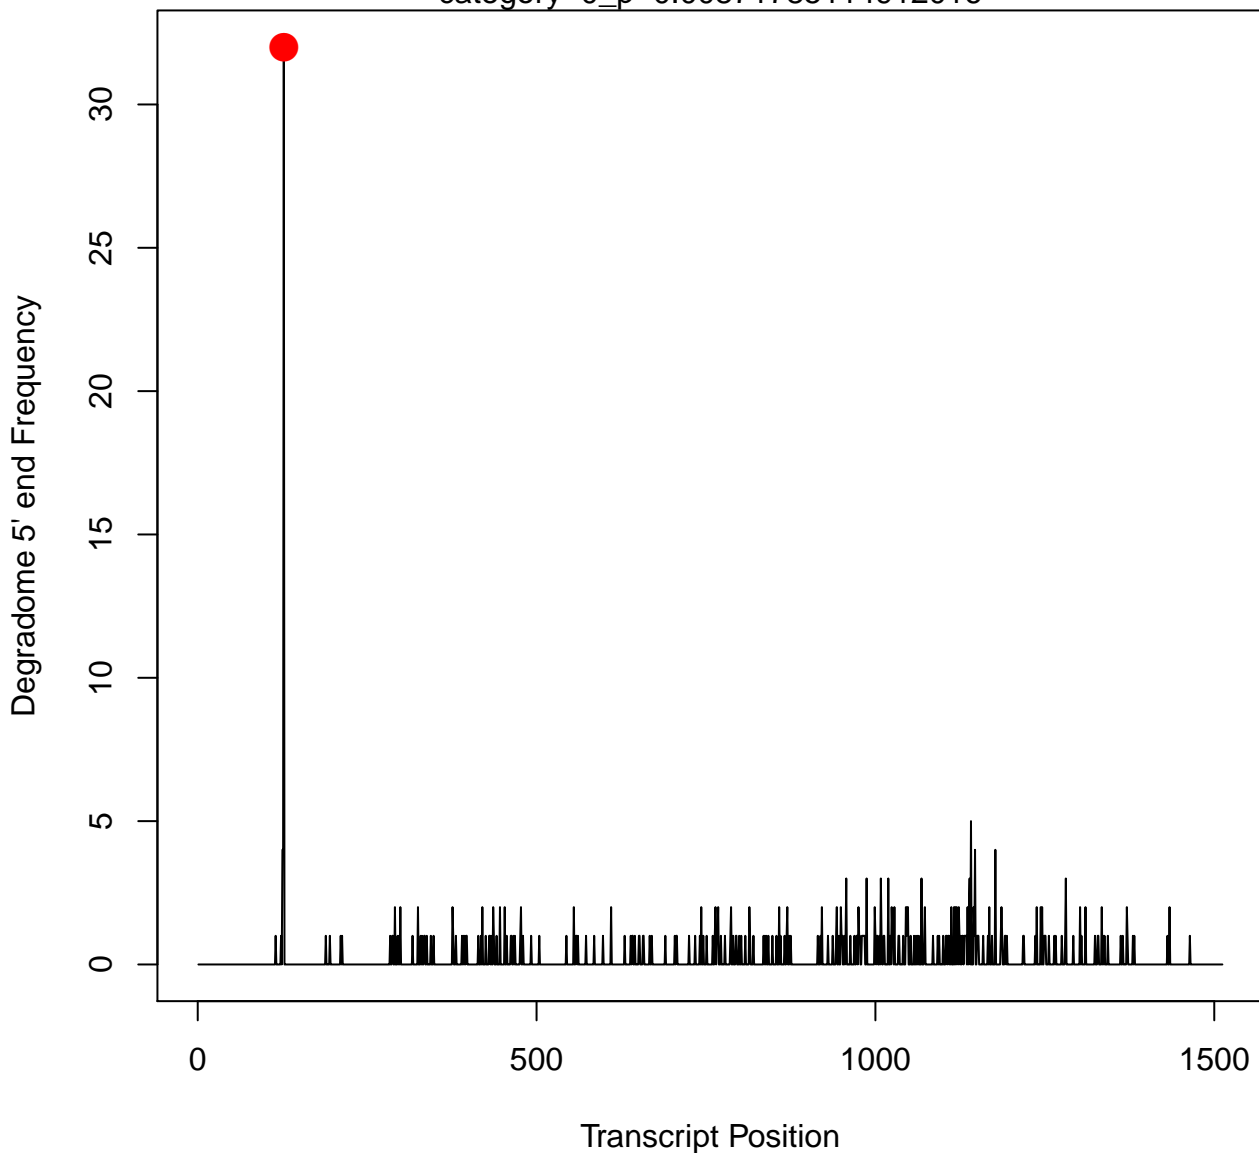

Supplement: s1 [file s1]

**T=Cluster-18410.94539\_Q=novel\_14\_S=311**

category=0\_p=0.0307120152379934

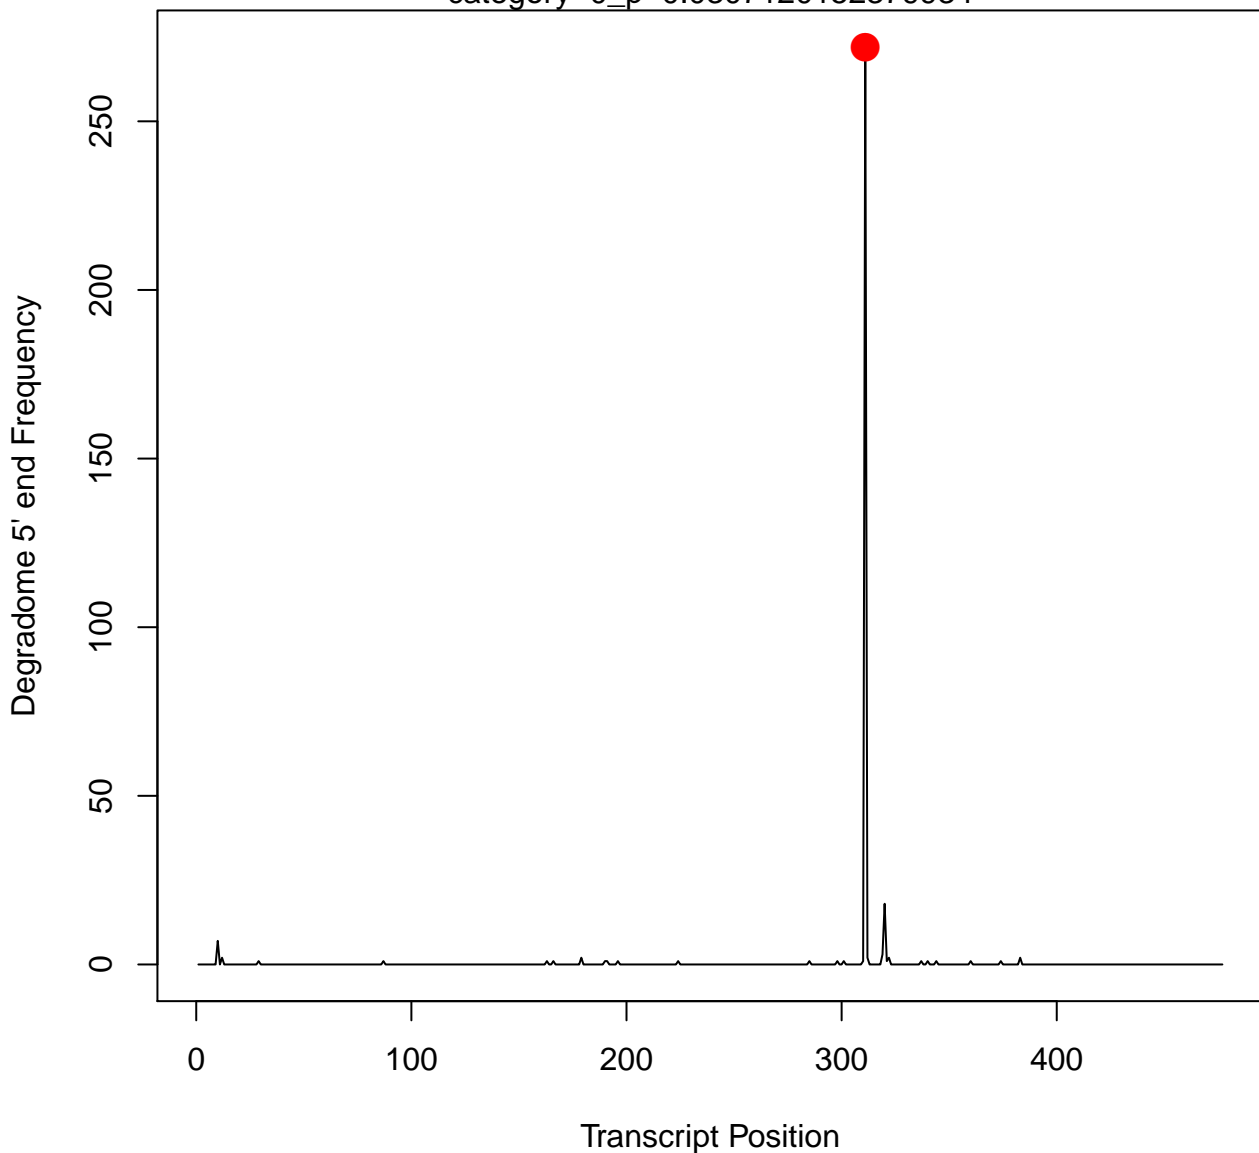

Supplement: s1 [file s1]

**T=Cluster-18410.26939\_Q=novel\_4\_S=1651**

category=4\_p=0.0942809831727407

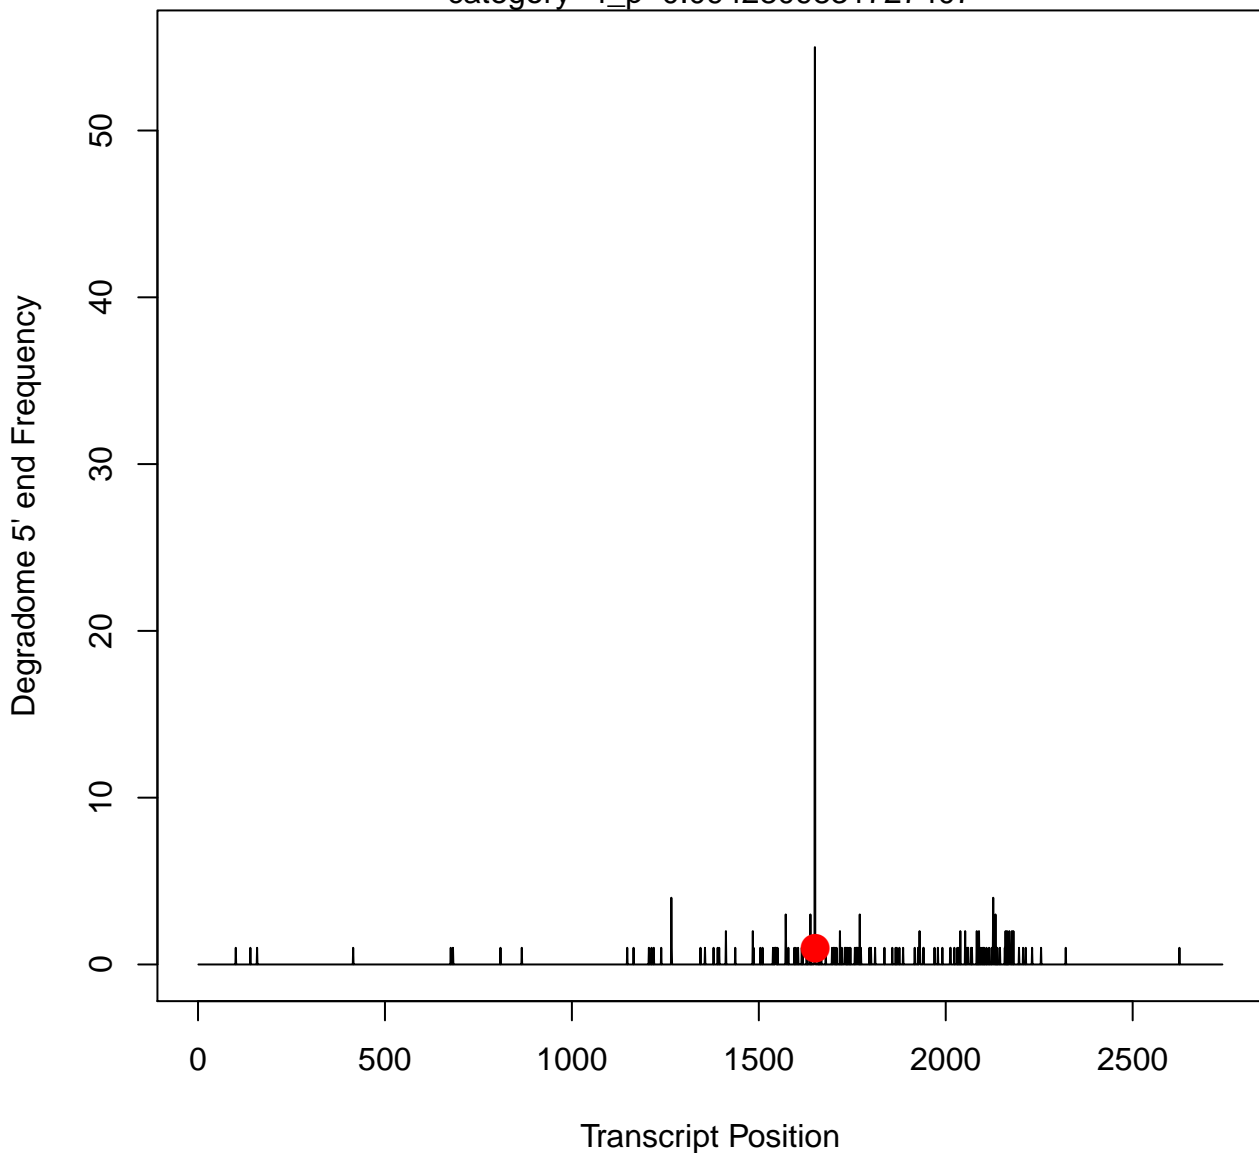

Supplement: s1 [file s1]

**T=Cluster-18410.62667\_Q=novel\_29\_S=2585**

category=0\_p=0.005185427902343

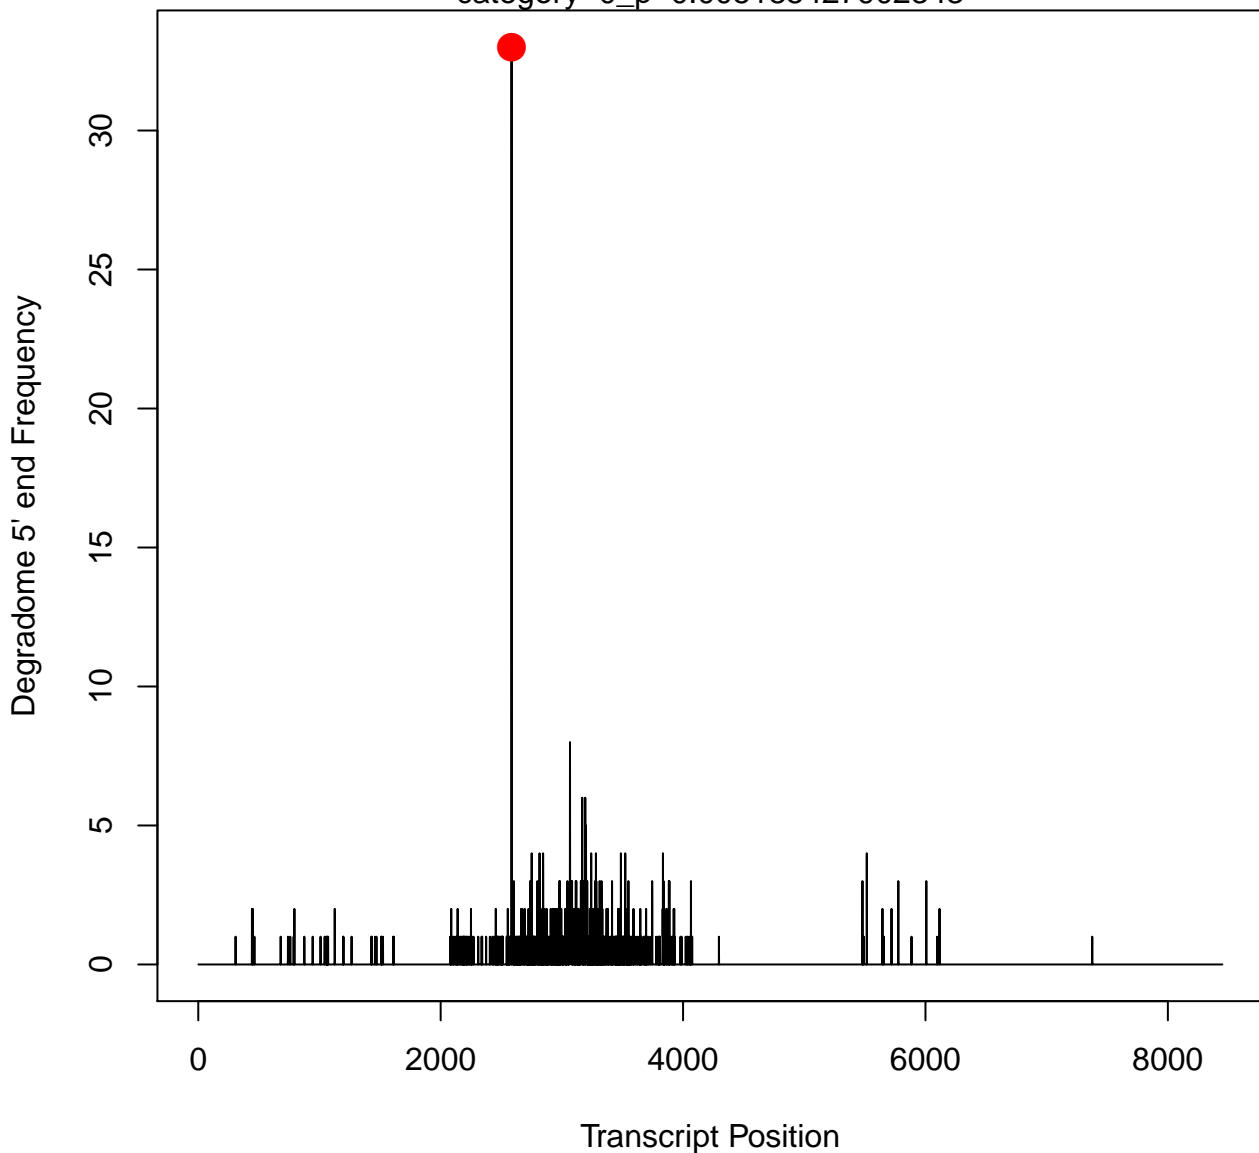

Supplement: s1 [file s1]

**T=Cluster-18410.5071\_Q=novel\_27\_S=136**

category=4\_p=0.0483072886549676

Degradome 5' end Frequency

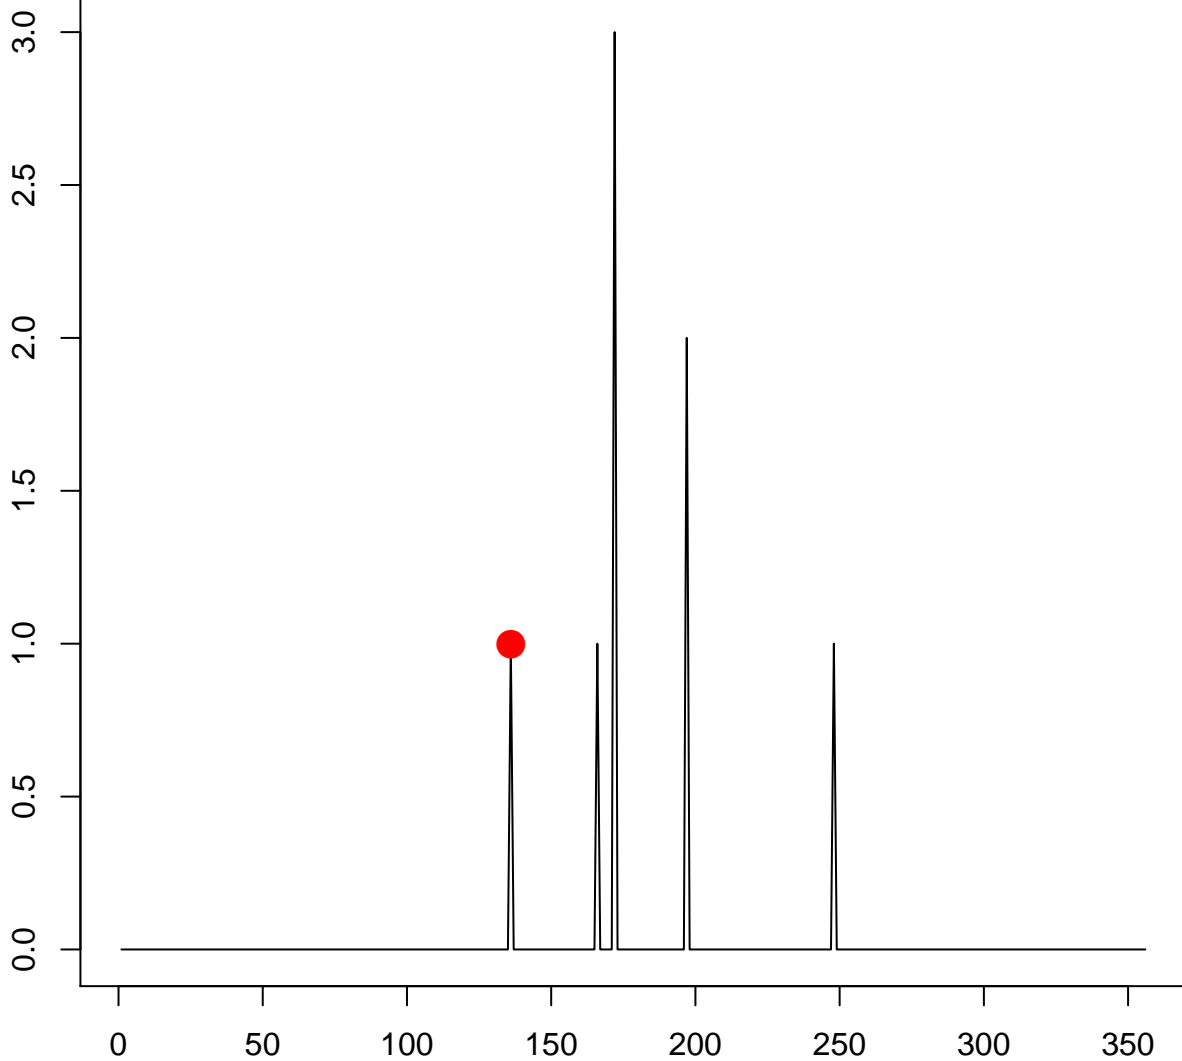

Transcript Position

Supplement: s1 [file s1]

**T=Cluster-4895.0\_Q=novel\_47\_S=44**

category=0\_p=0.00273253291772324

Degradome 5' end Frequency

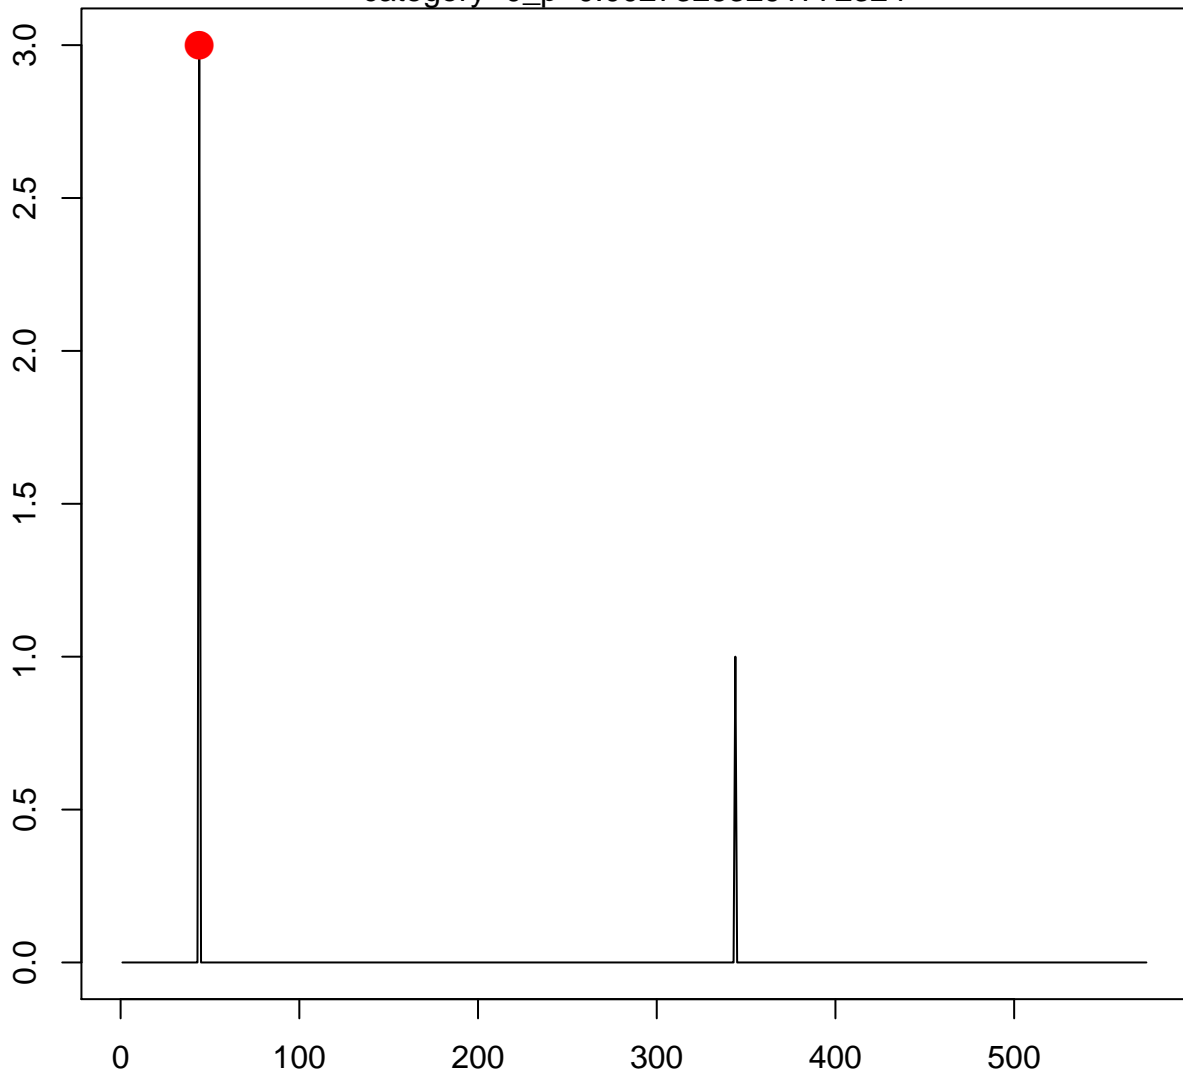

Transcript Position

Supplement: s1 [file s1]

**T=Cluster-18410.107931\_Q=novel\_34\_S=101**

category=2\_p=0.0115490438418195

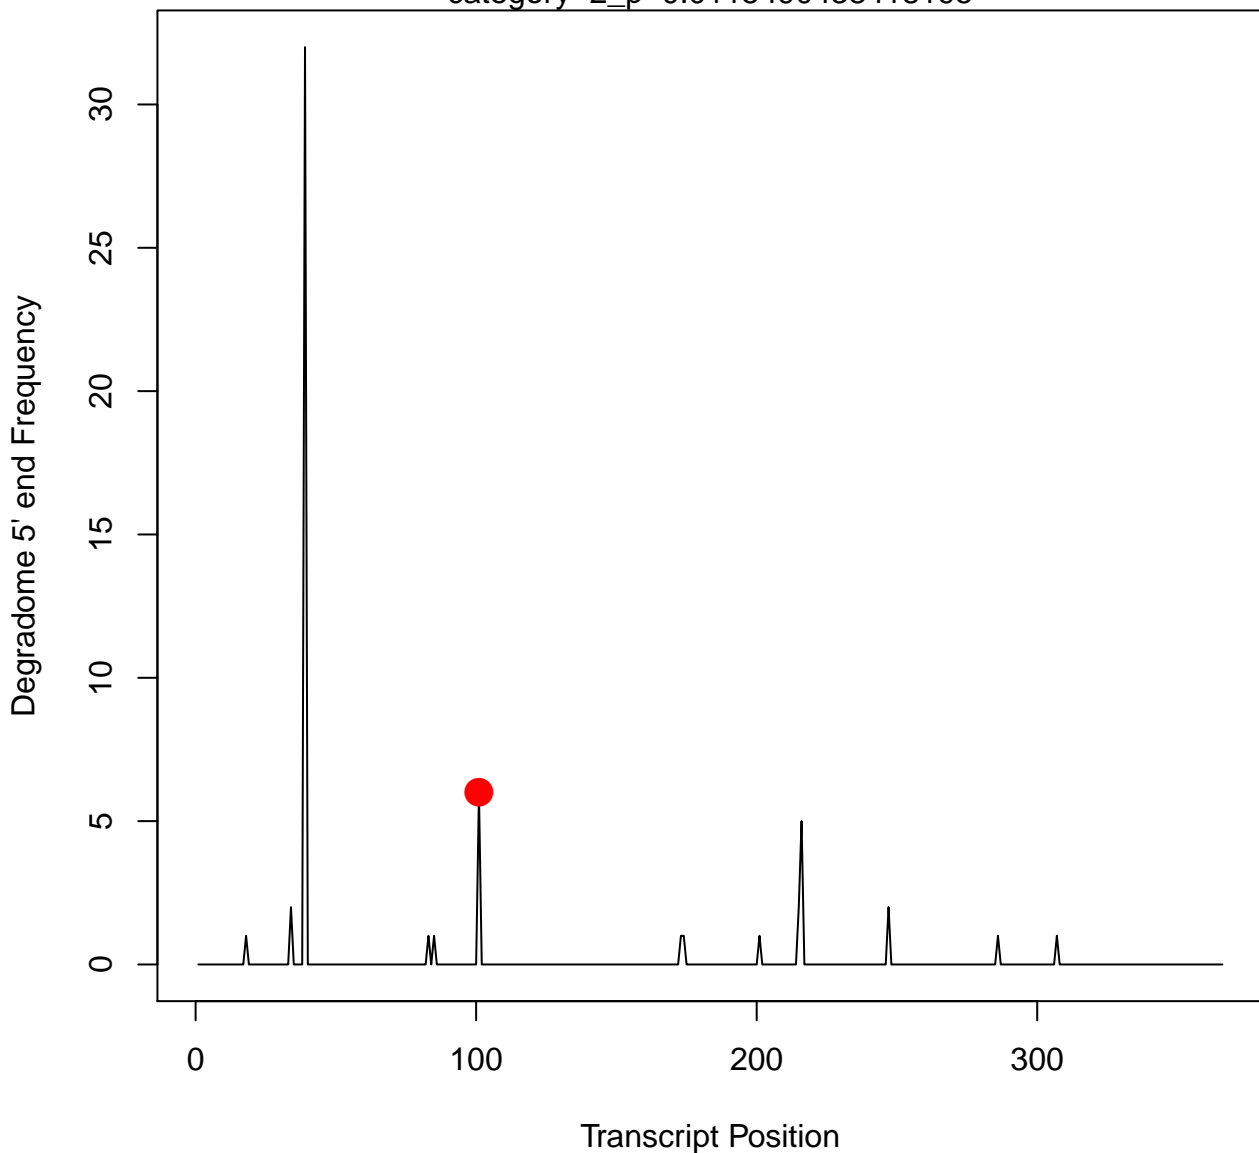

Supplement: s1 [file s1]

**T=Cluster-18410.69873\_Q=novel\_32\_S=925**

category=0\_p=0.00273253291772324

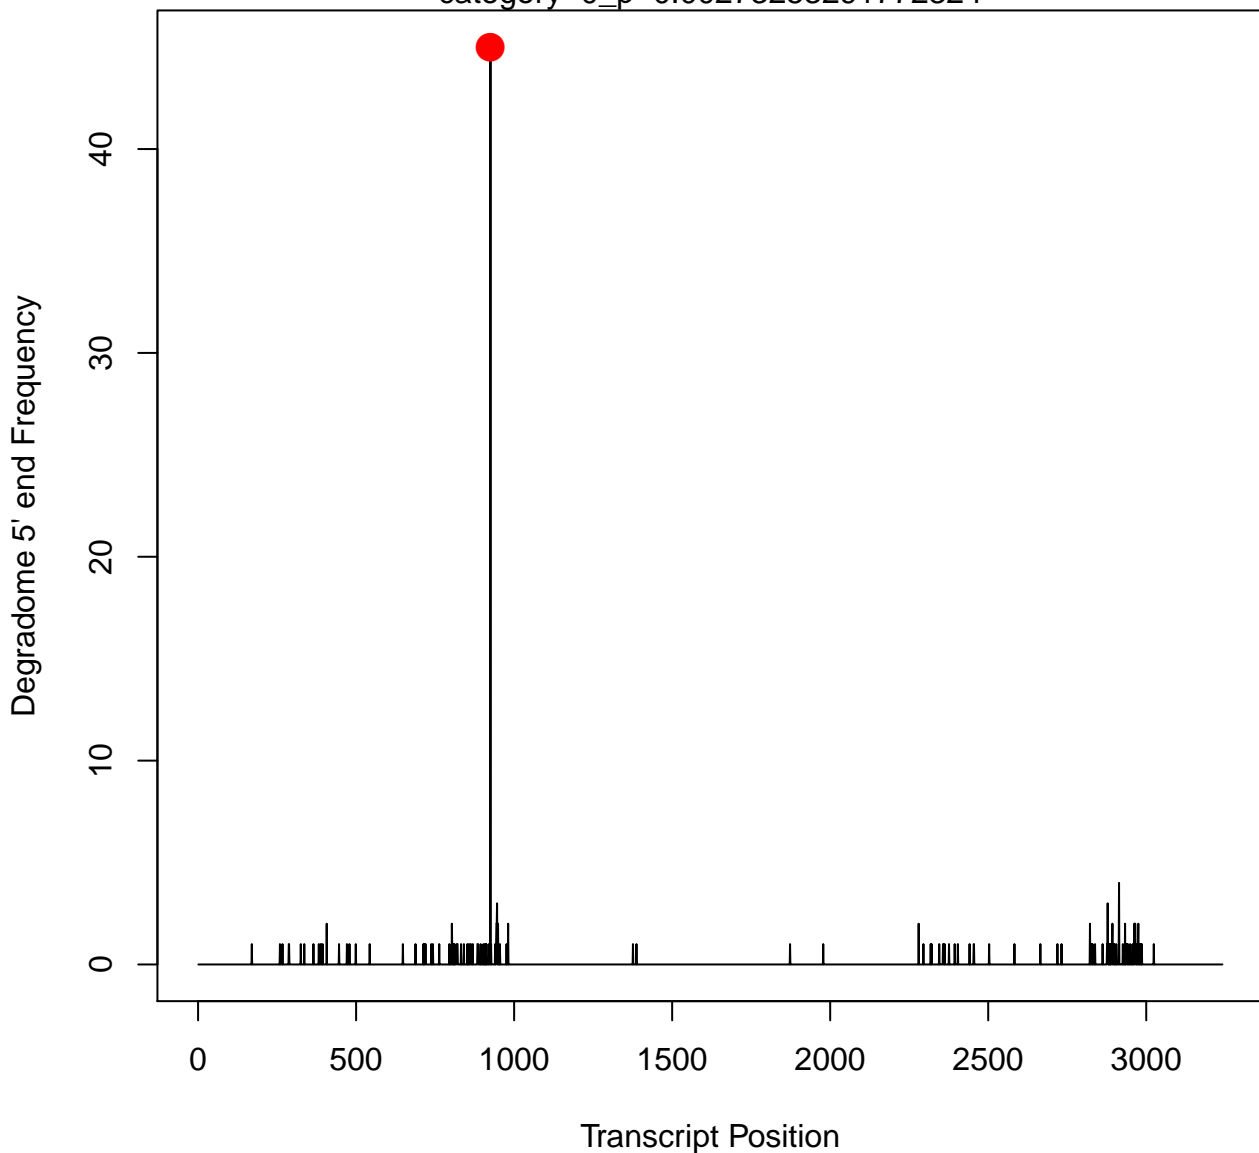

Supplement: s1 [file s1]

**T=Cluster-18410.83253\_Q=novel\_42\_S=298**

category=0\_p=0.00464086203705827

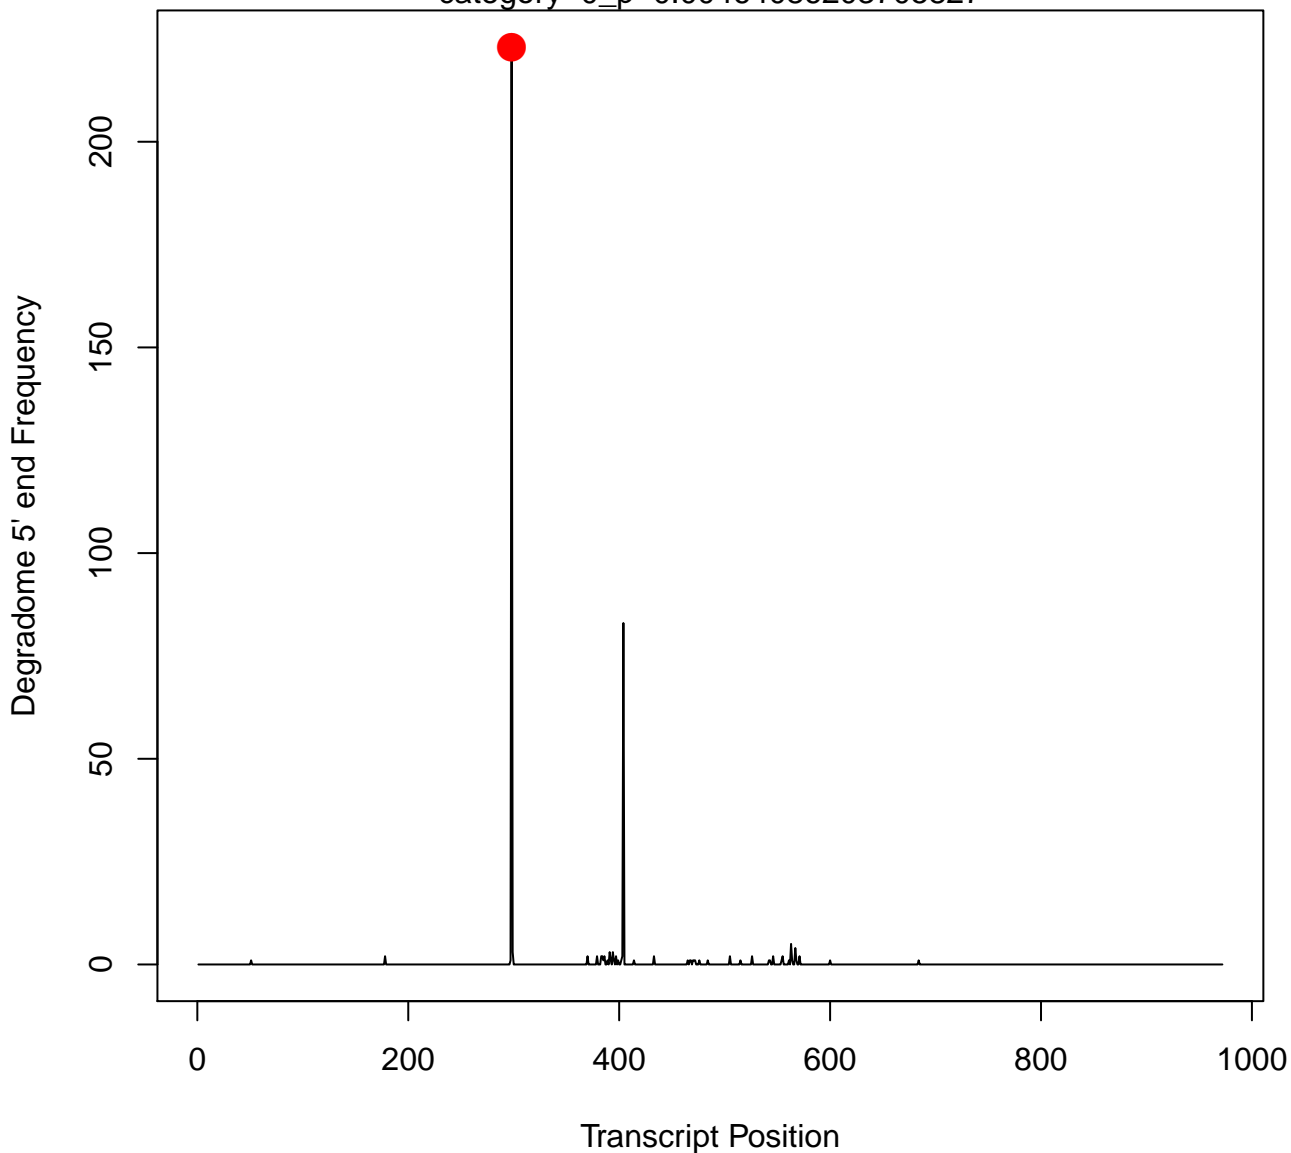

Supplement: s1 [file s1]

**T=Cluster-18410.81256\_Q=novel\_148\_S=21**

category=0\_p=0.00273253291772324

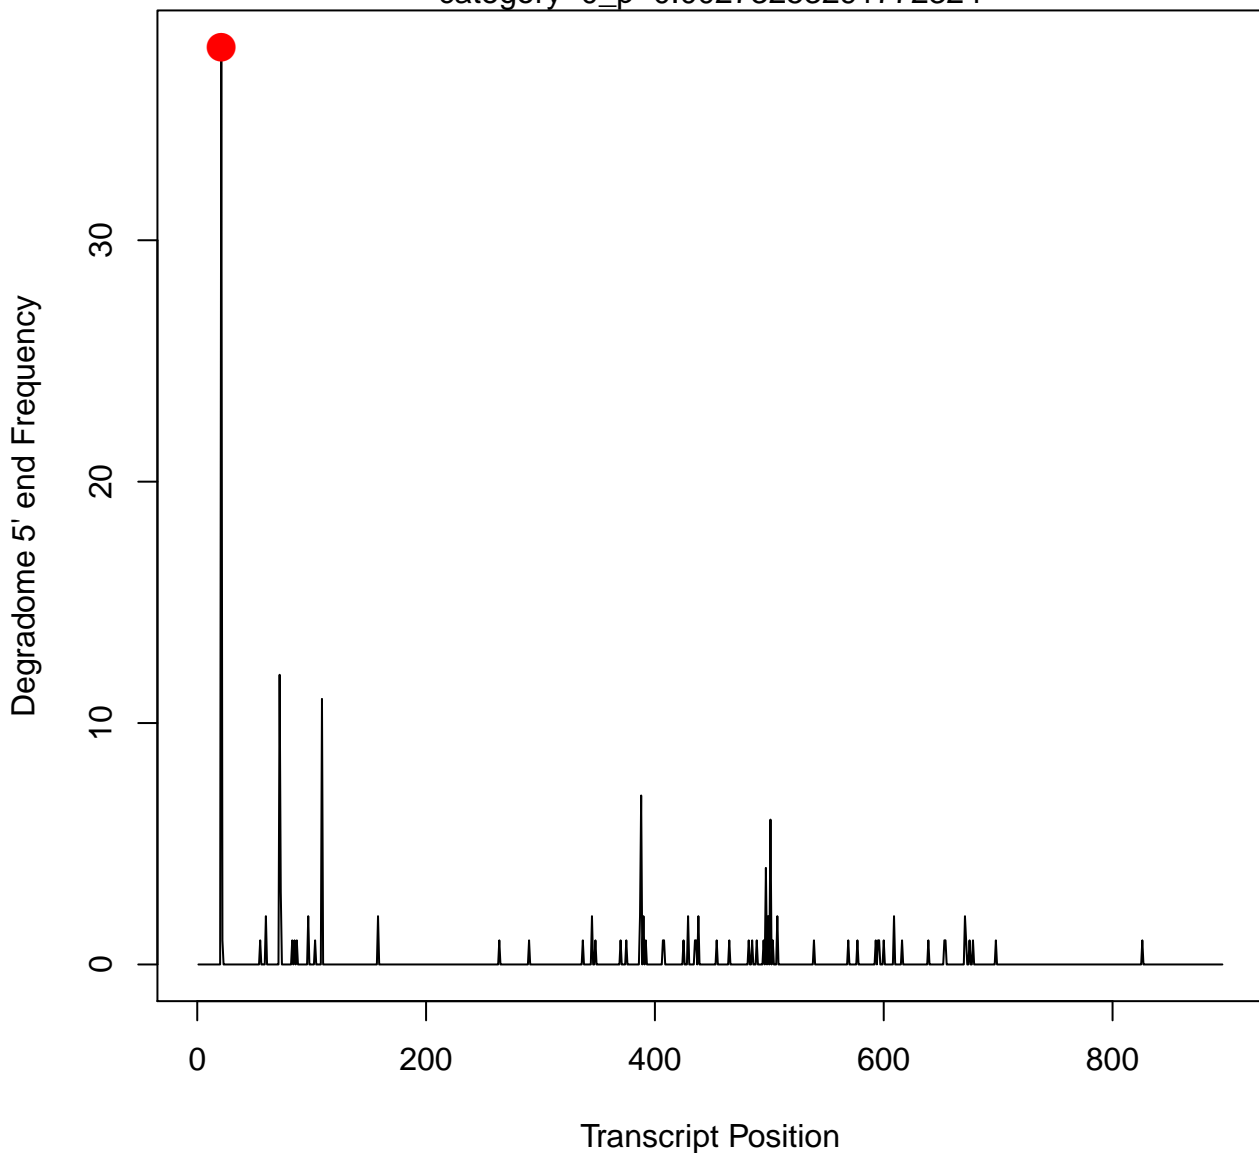

Supplement: s1 [file s1]

**T=Cluster-18410.112333\_Q=pma-miR951\_S=160**

category=0\_p=0.018434621893812

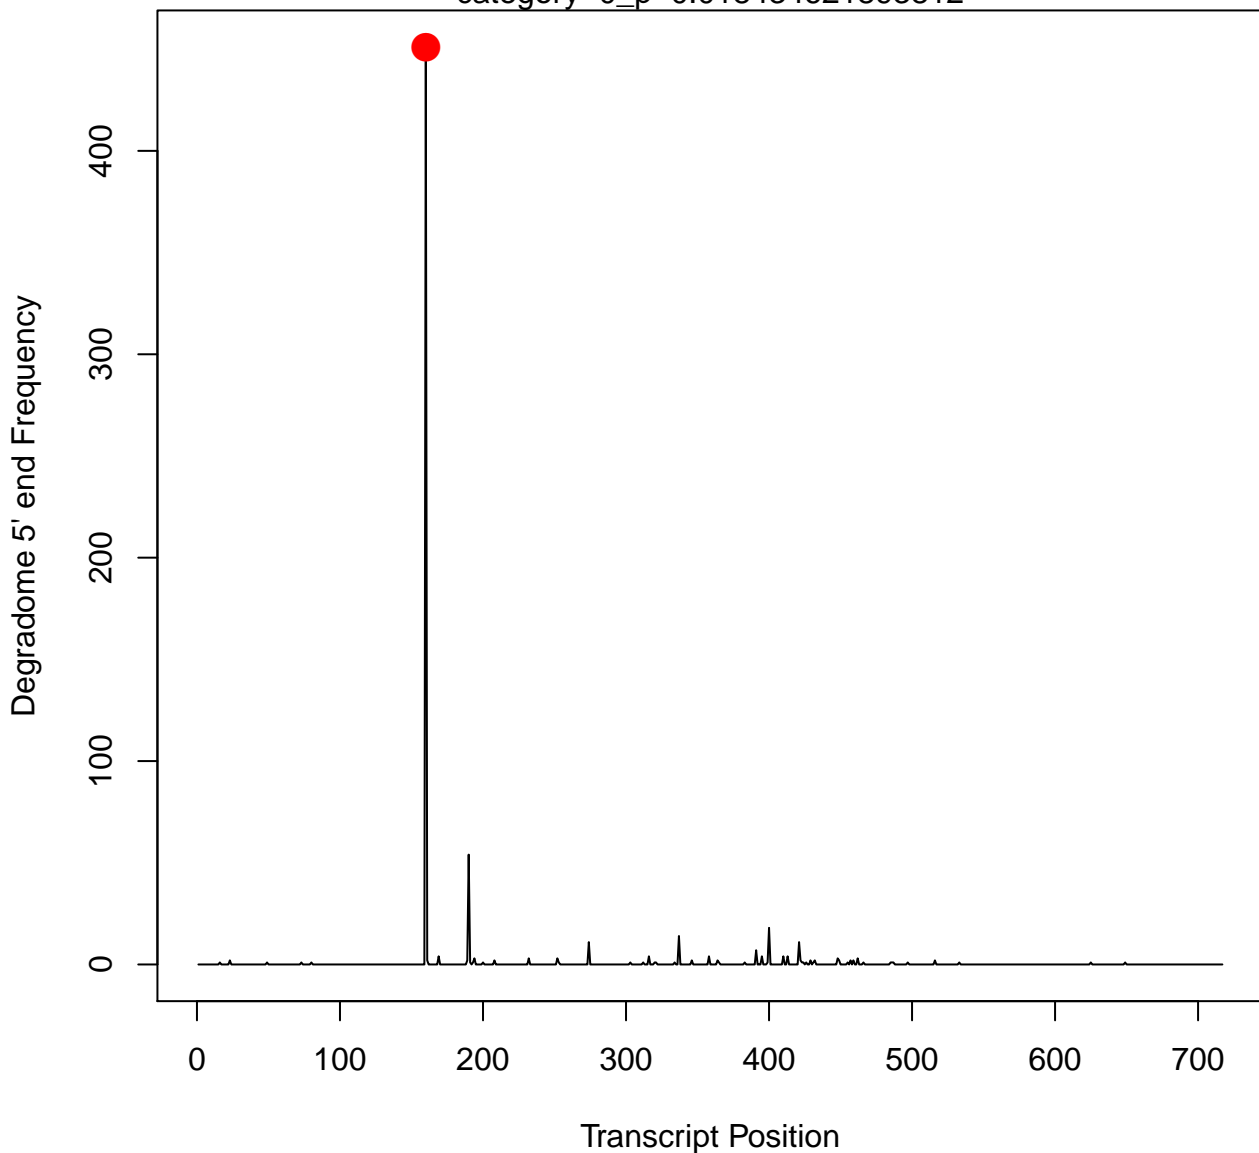

Supplement: s1 [file s1]

**T=Cluster-18410.43885\_Q=novel\_168\_S=2089**

category=1\_p=0.0273822540496624

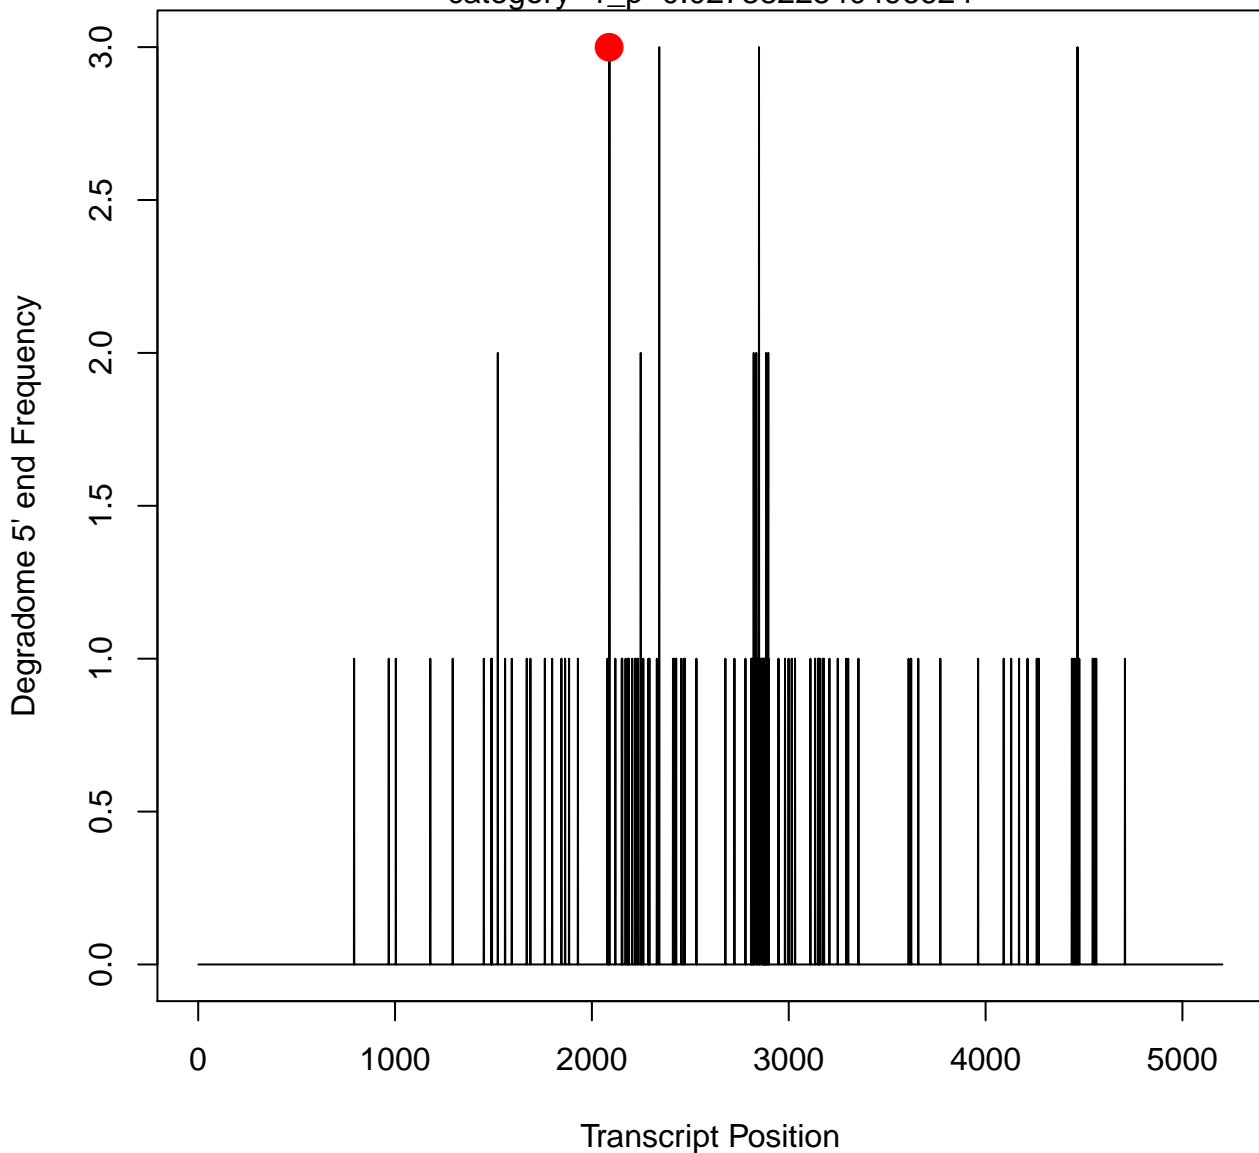

Supplement: s1 [file s1]

**T=Cluster-9119.0\_Q=novel\_80\_S=2706**

category=0\_p=0.00545759909929999

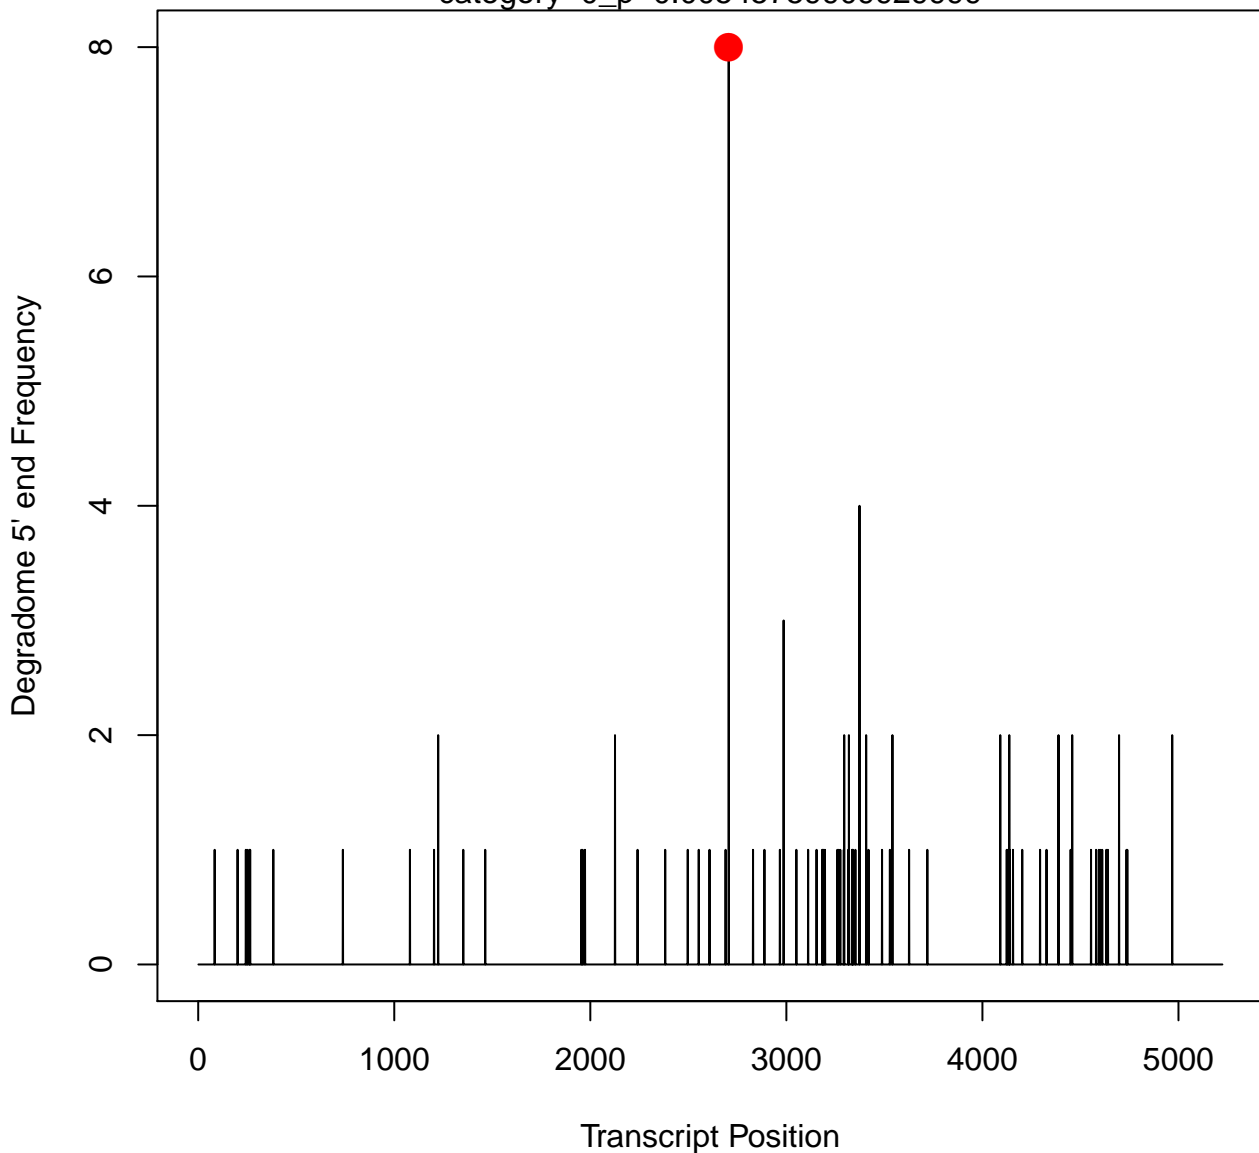

Supplement: s1 [file s1]

**T=Cluster-18410.53191\_Q=novel\_104\_S=809**

category=4\_p=0.0715786587755043

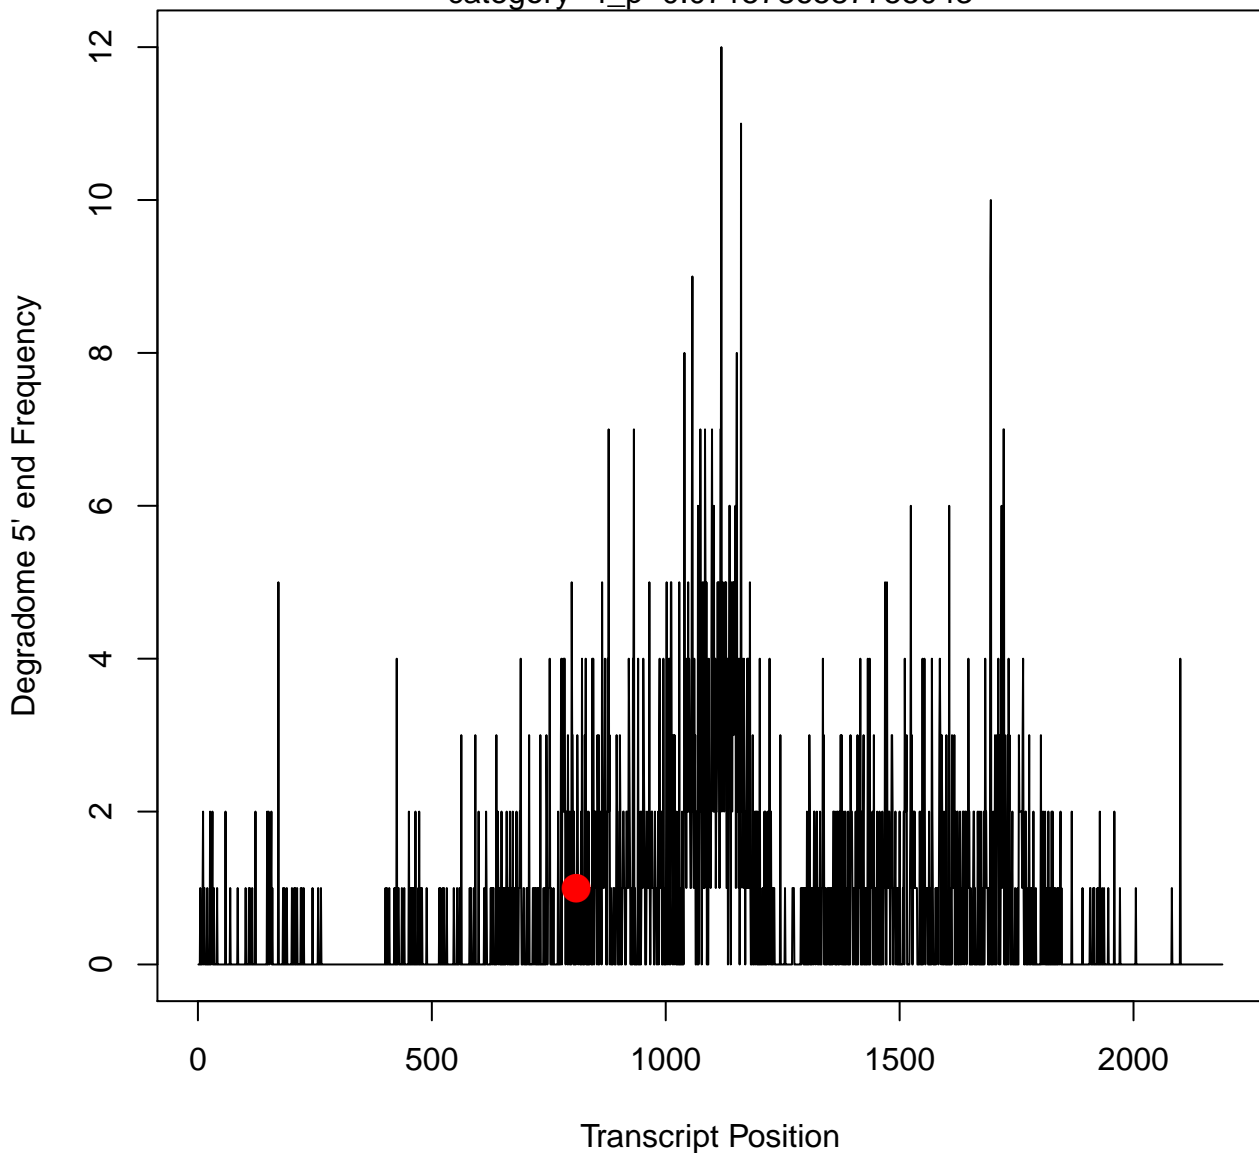

Supplement: s1 [file s1]

**T=Cluster-18410.81148\_Q=novel\_55\_S=97**

category=4\_p=0.0942809831727407

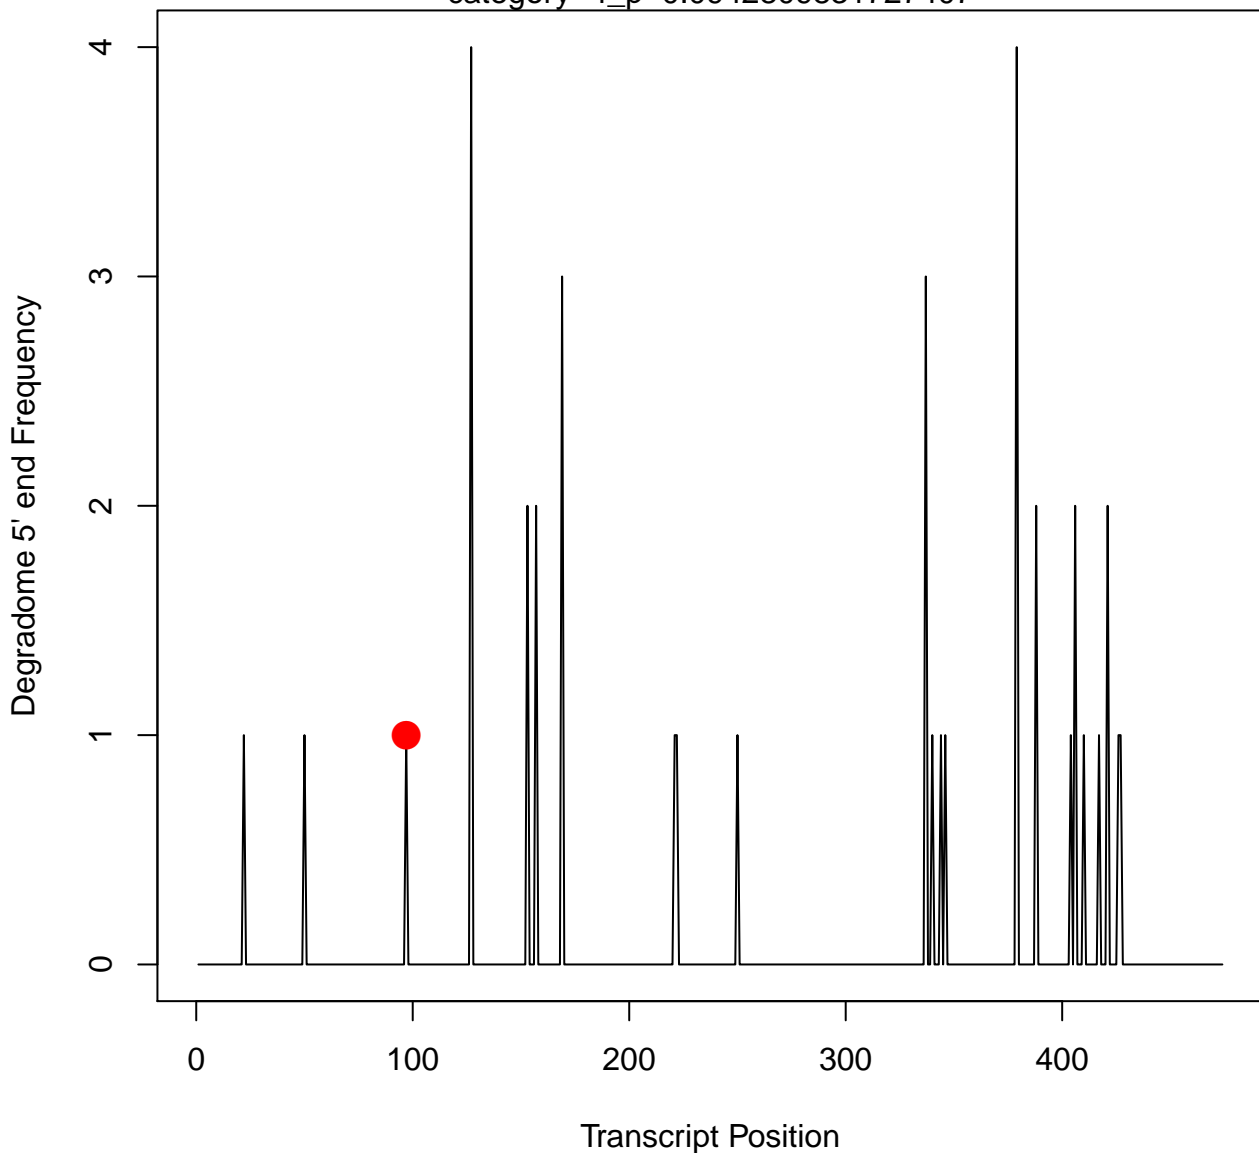

Supplement: s1 [file s1]

**T=Cluster-18410.62475\_Q=novel\_185\_S=2529**

category=2\_p=0.0780956144108357

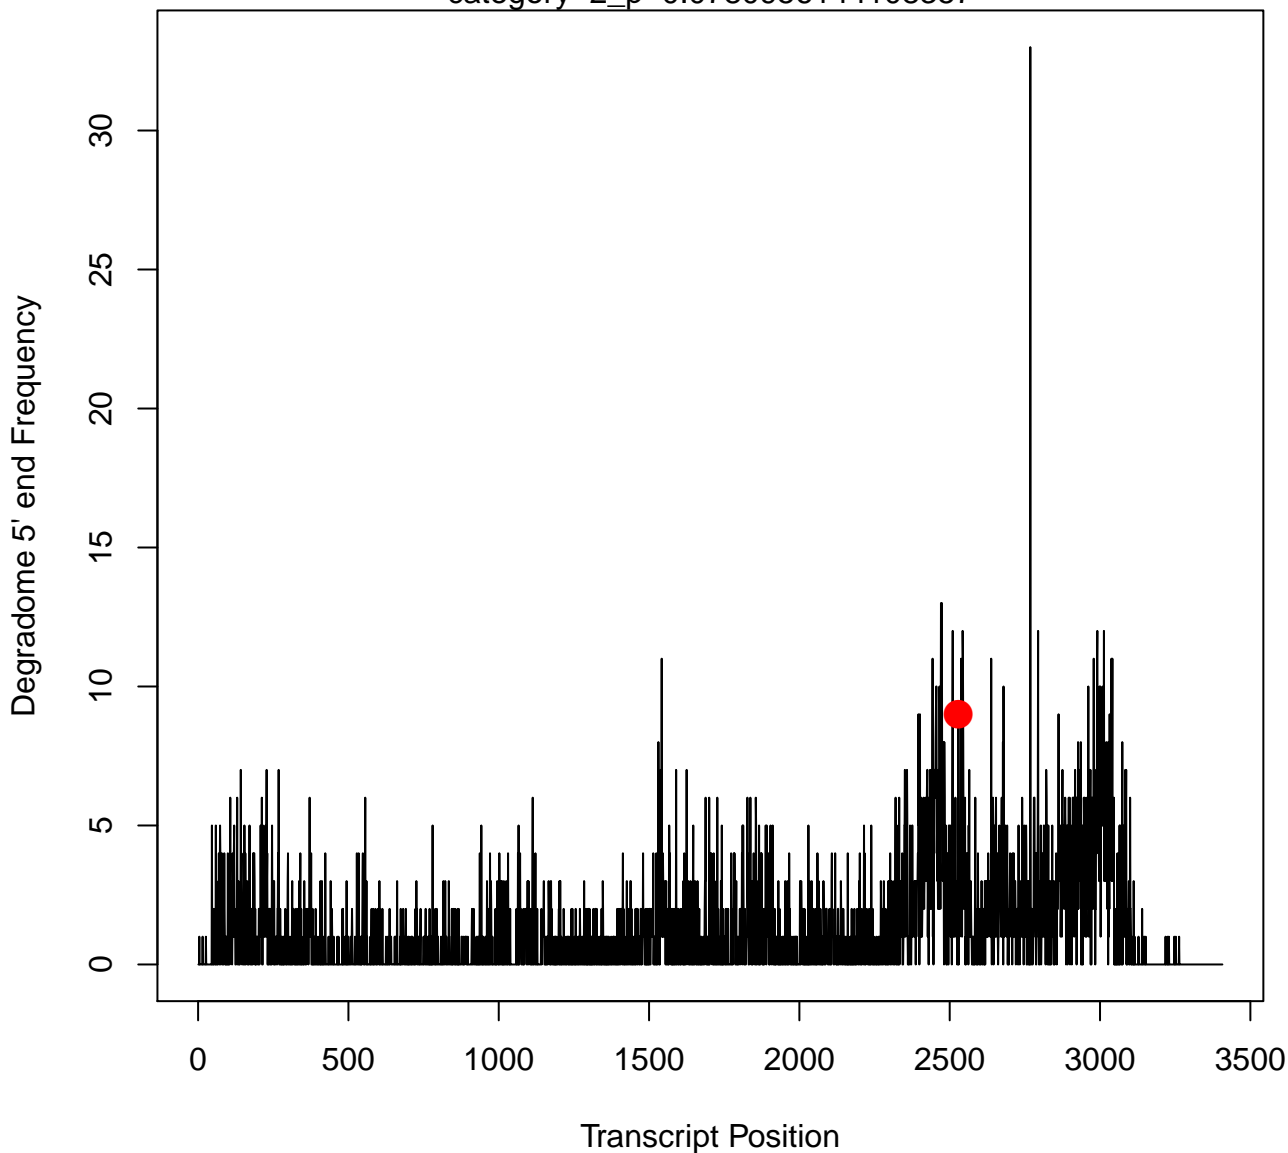

Supplement: s1 [file s1]

**T=Cluster-18410.39681\_Q=novel\_71\_S=469**

category=2\_p=0.0992668787568005

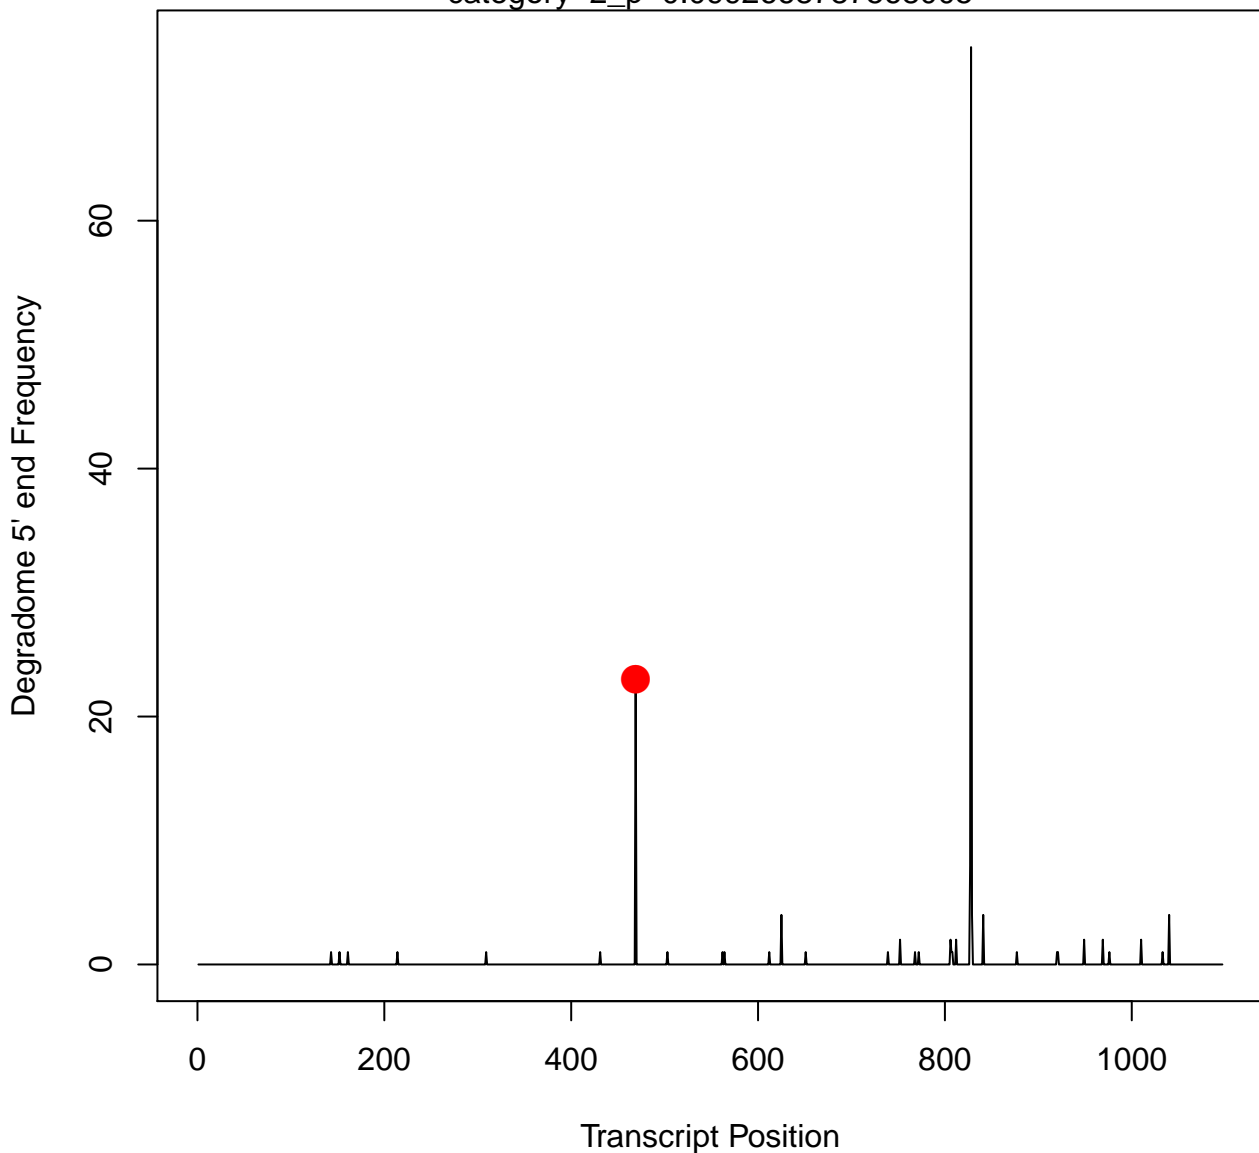

Supplement: s1 [file s1]

**T=Cluster-18410.108654\_Q=novel\_114\_S=1276**

category=1\_p=0.00528922433010992

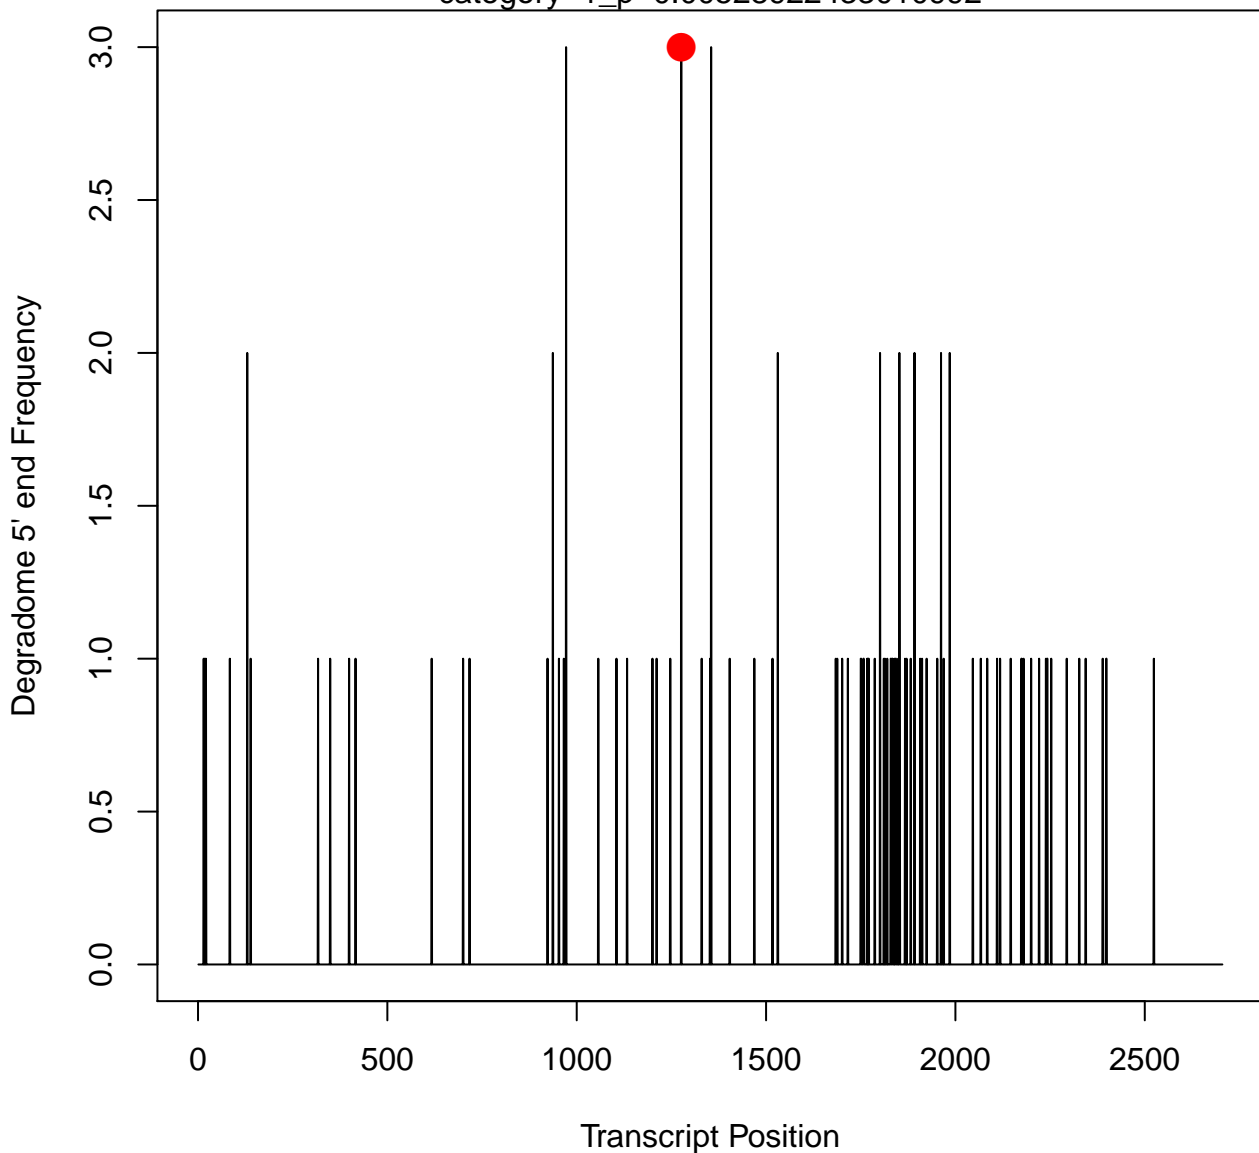

Supplement: s1 [file s1]

**T=Cluster-18410.18207\_Q=novel\_47\_S=372**

category=0\_p=0.0141278717118409

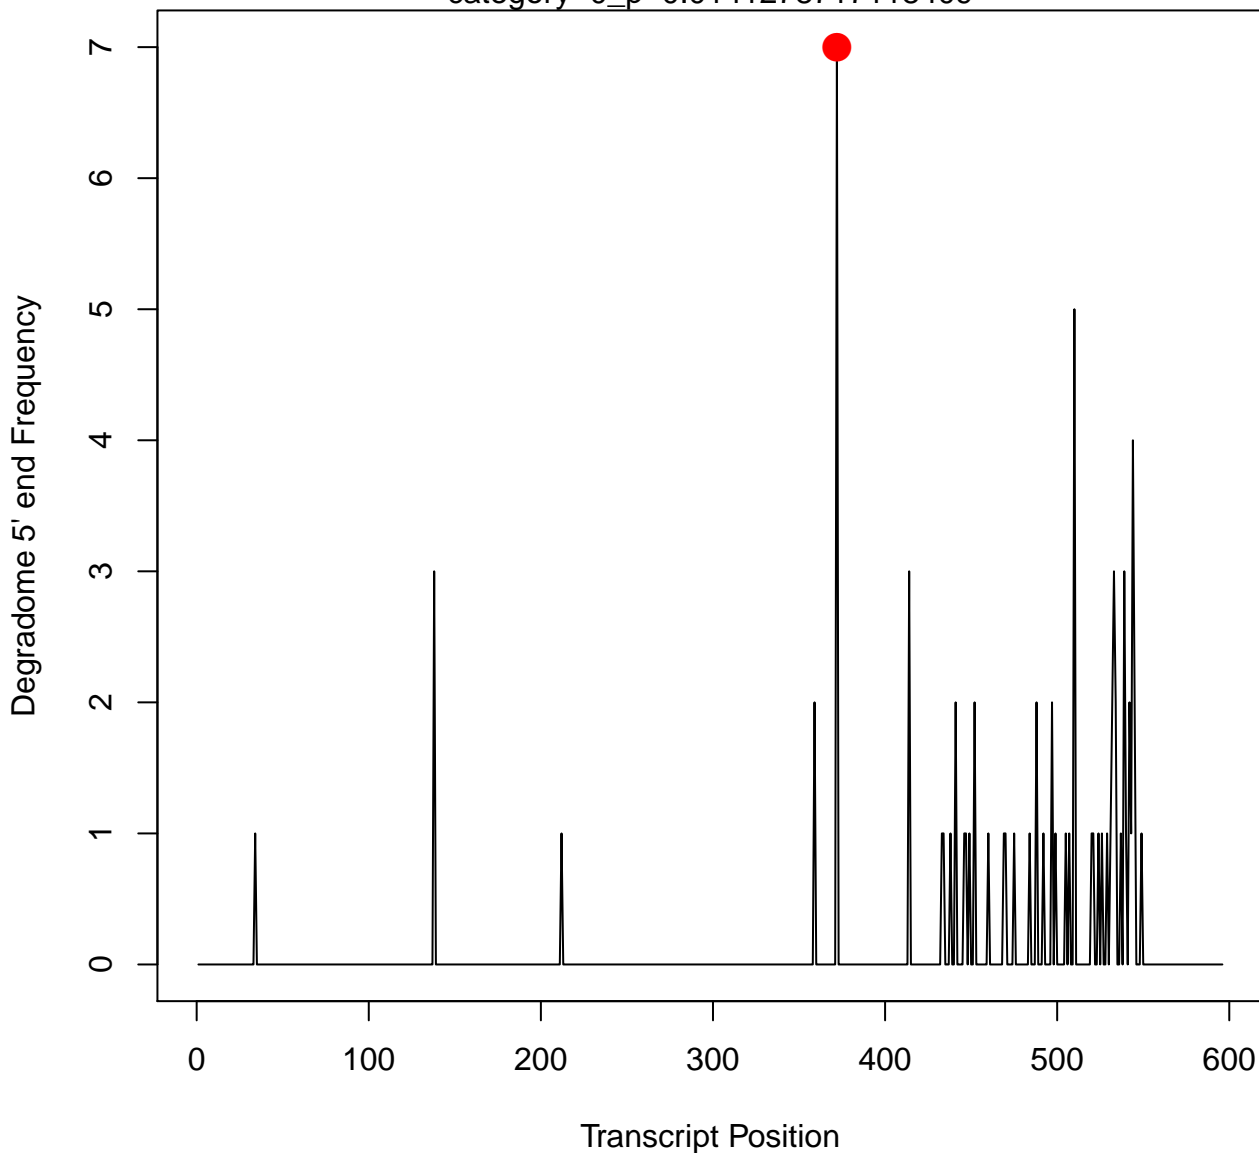

Supplement: s1 [file s1]

**T=Cluster-18410.3106\_Q=pma-miR947\_S=367**

category=1\_p=0.00218131350451389

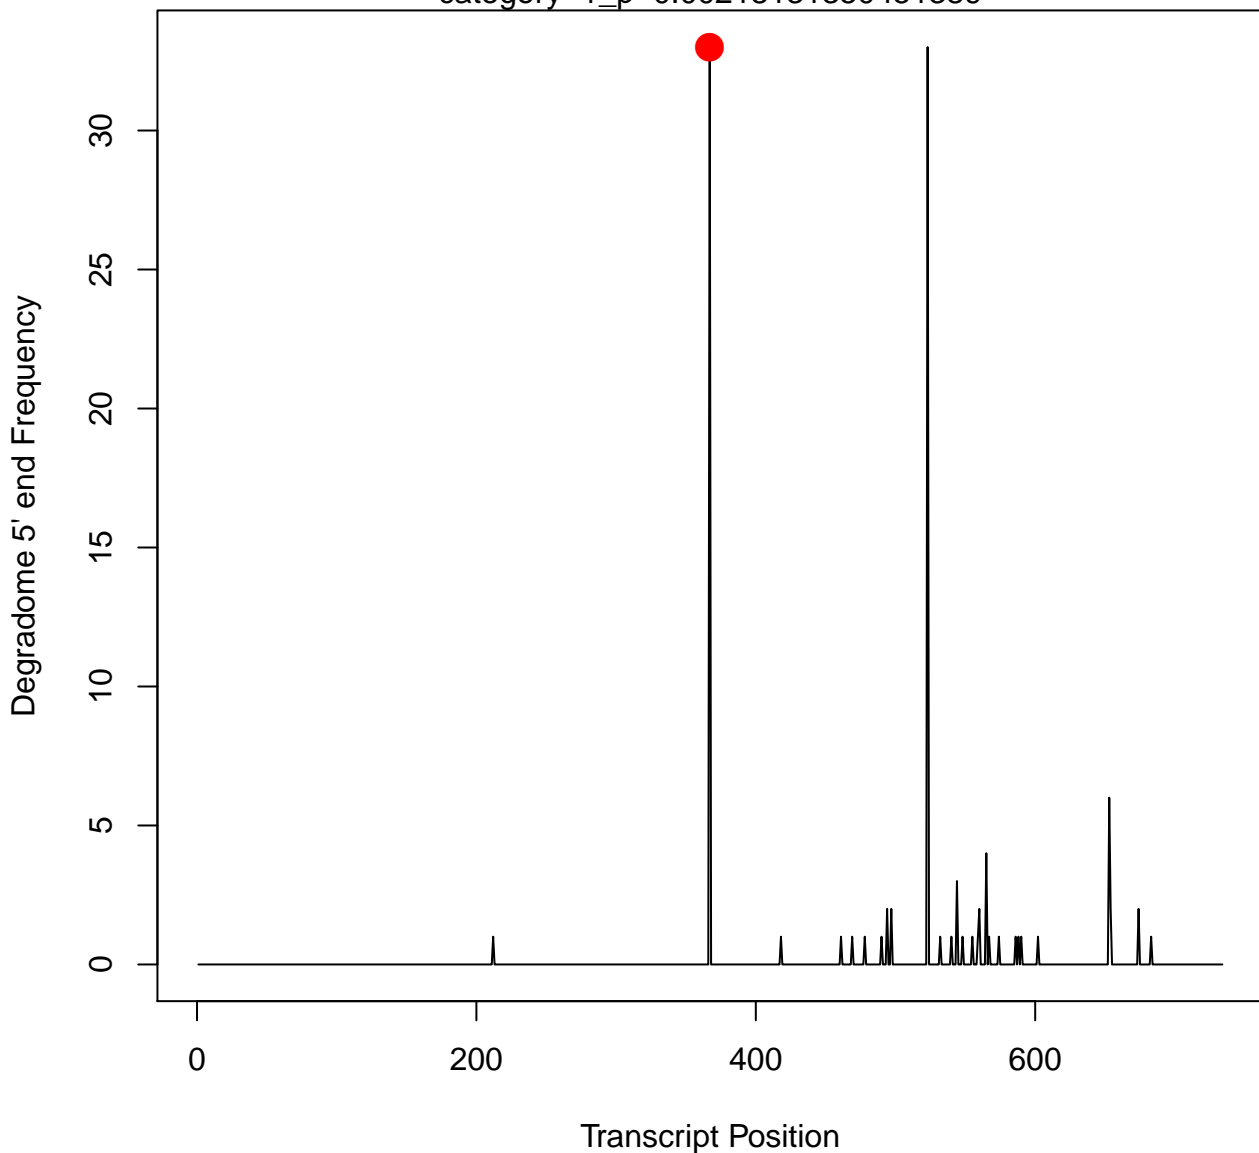

Supplement: s1 [file s1]

**T=Cluster-18410.17802\_Q=novel\_47\_S=164**

category=0\_p=0.0103439671421557

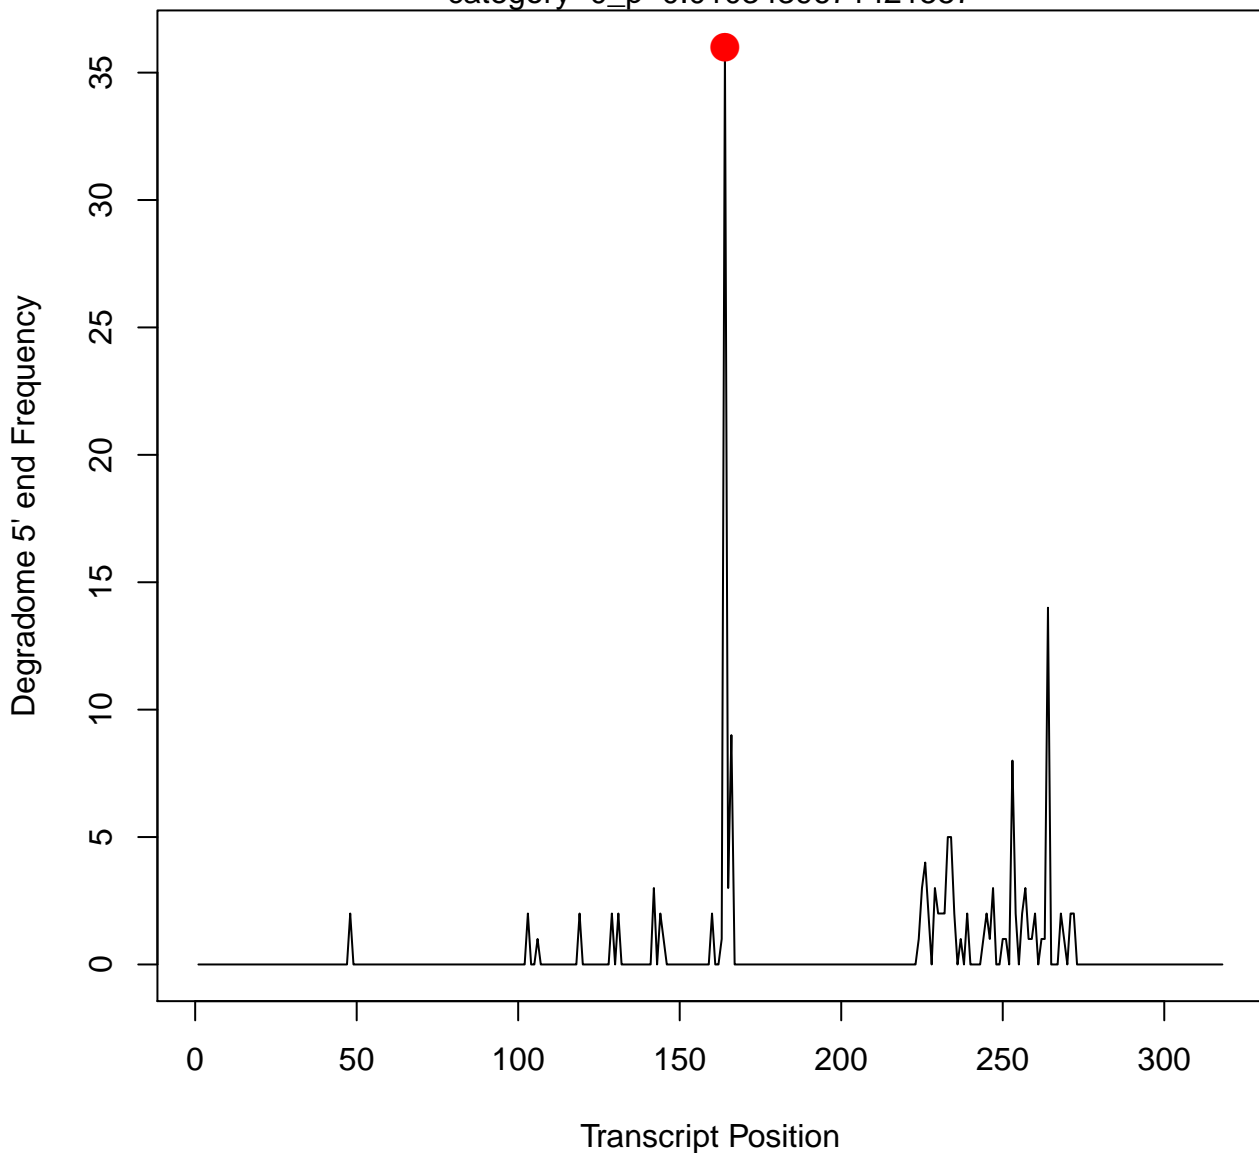

Supplement: s1 [file s1]
