# Supplementary figures and images for: Uncovering miRNA-mRNA Regulatory Modules in Developing Xylem of Pinus massoniana via Small RNA and Degradome Sequencing (part 2 of 9)
Source: MDPI journal article supplement (doi:10.3390/ijms221810154), 2021-09-21

**T=Cluster-18410.83859\_Q=novel\_74\_S=606**

category=1\_p=0.00497886935599645

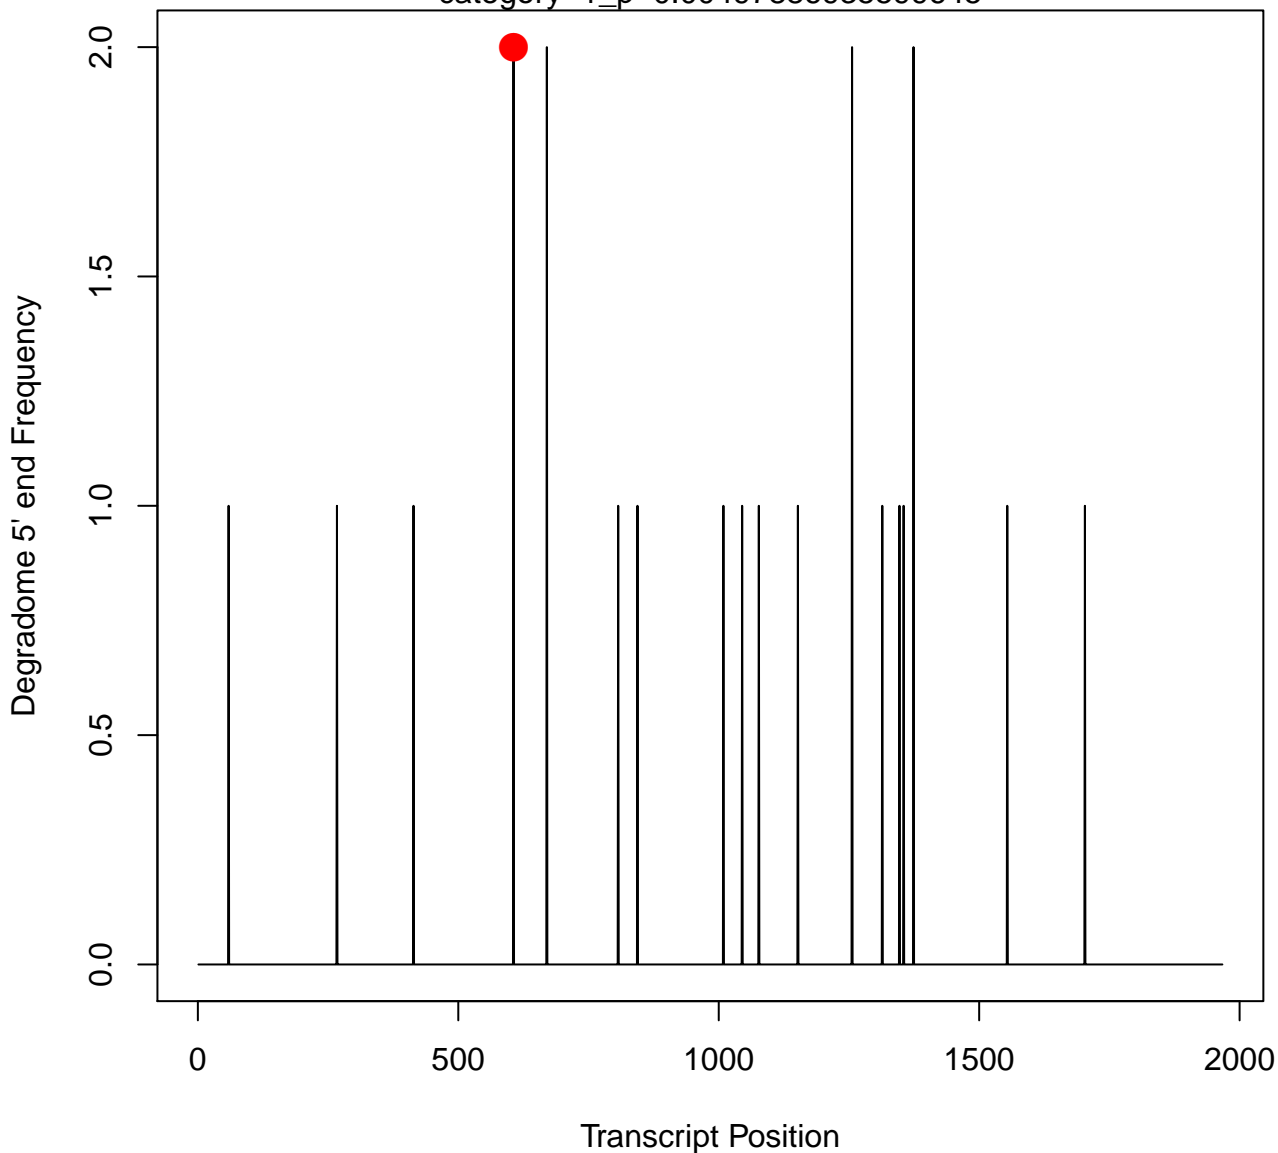

Supplement: s1 [file s1]

**T=Cluster-18410.28837\_Q=novel\_14\_S=233**

category=2\_p=0.0229647072699788

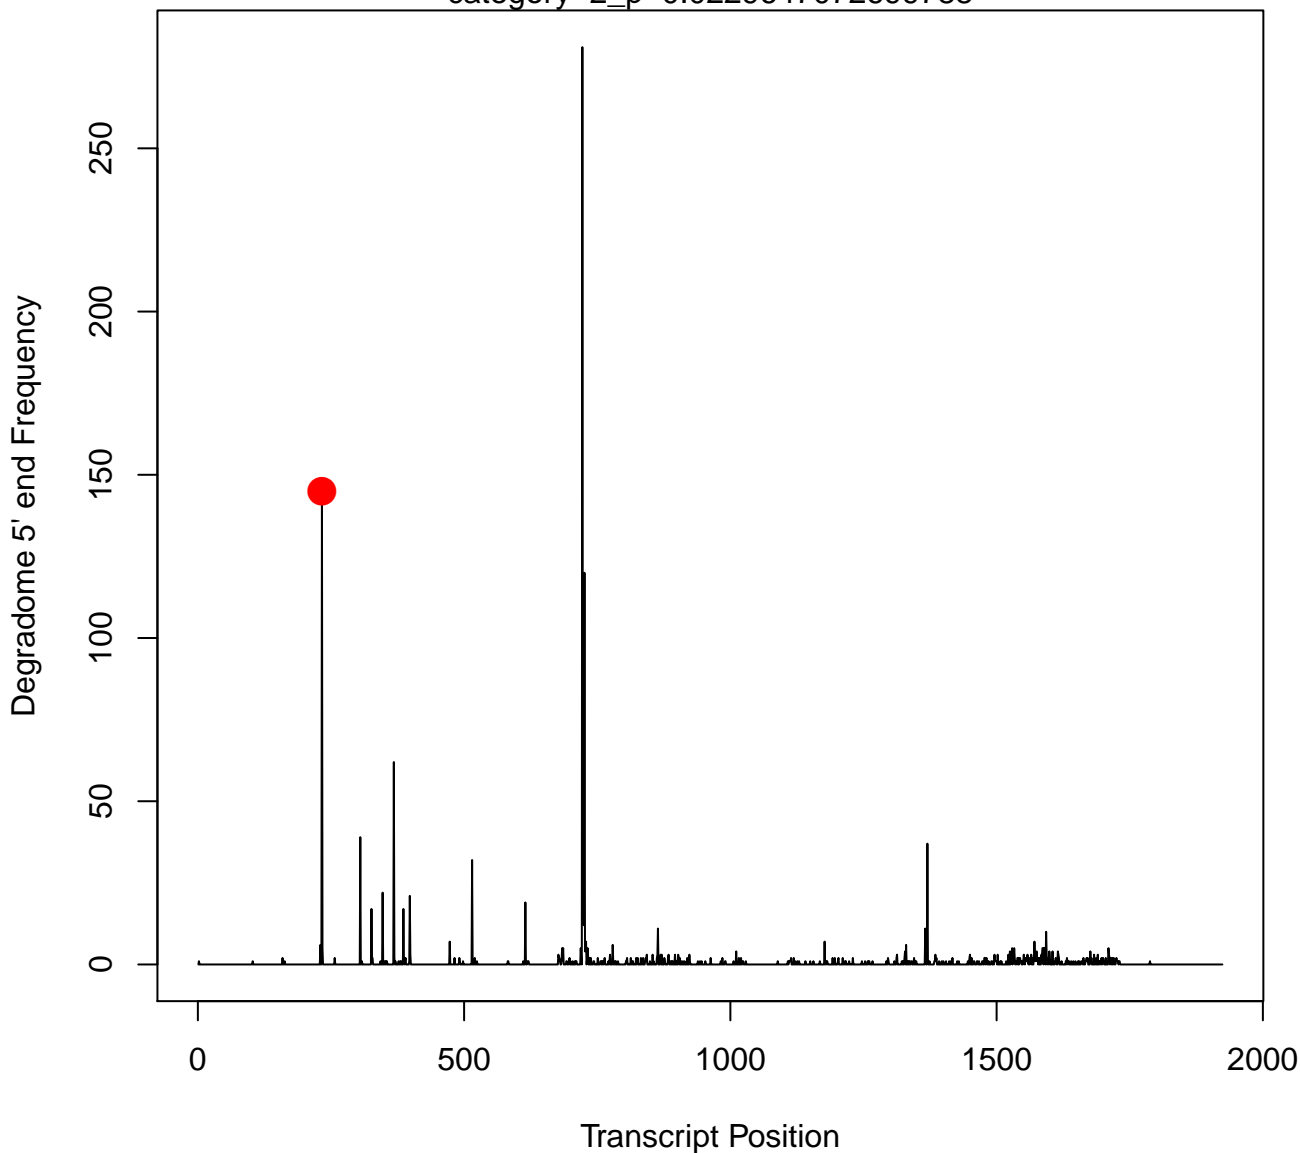

Supplement: s1 [file s1]

**T=Cluster-18410.99100\_Q=novel\_175\_S=750**

category=1\_p=0.073870604161329

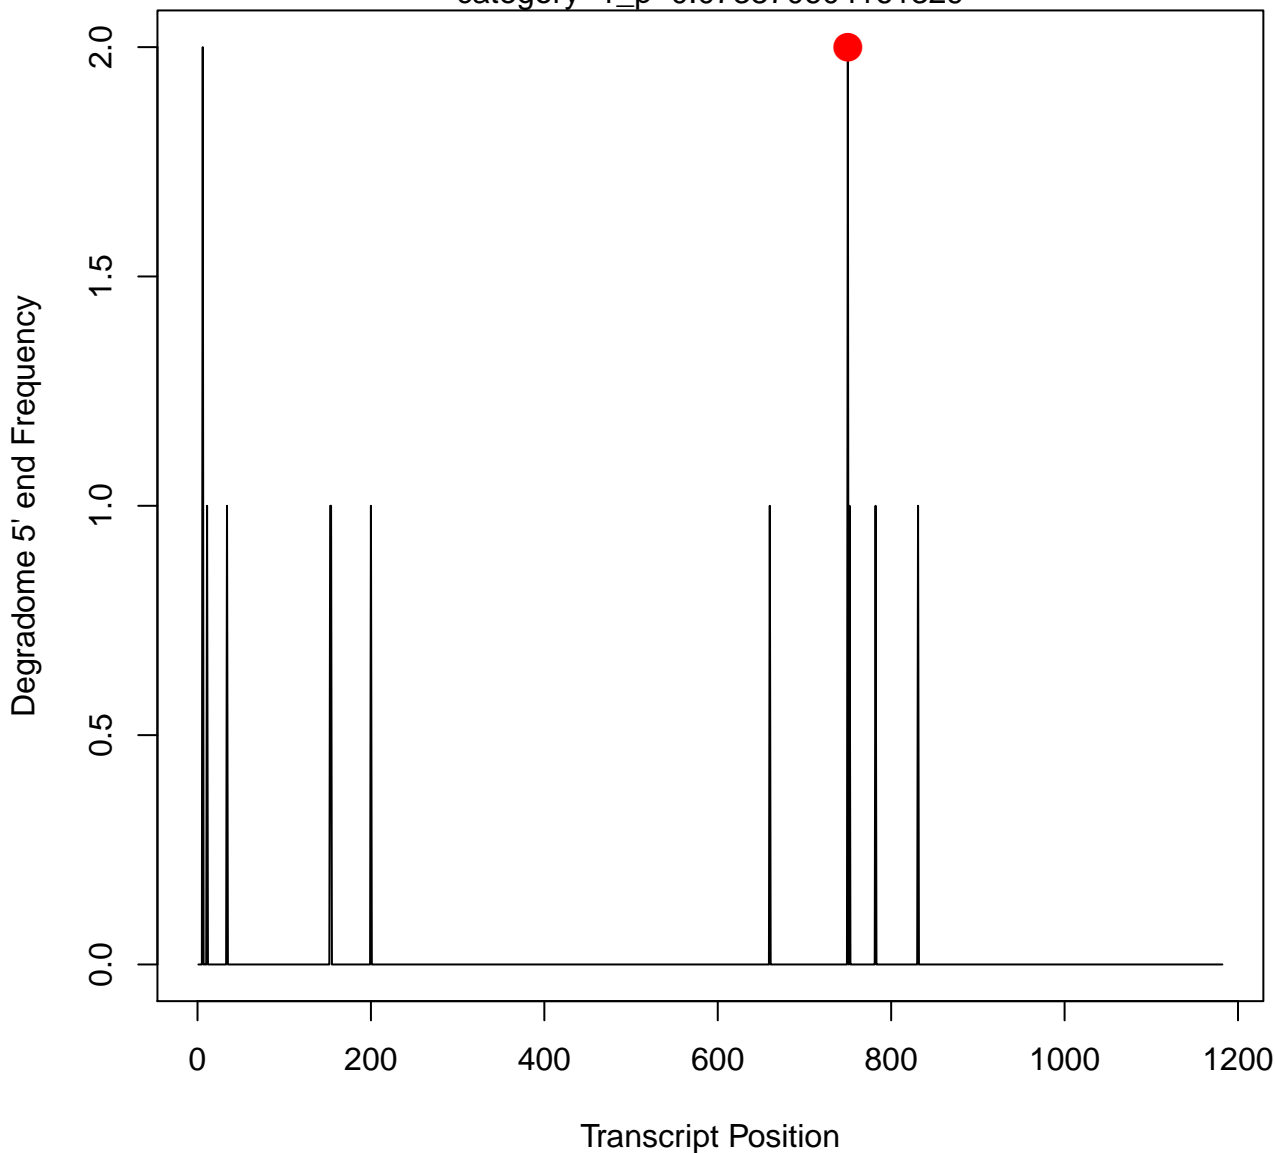

Supplement: s1 [file s1]

**T=Cluster-18410.13076\_Q=novel\_23\_S=24**

category=0\_p=0.00708906326490744

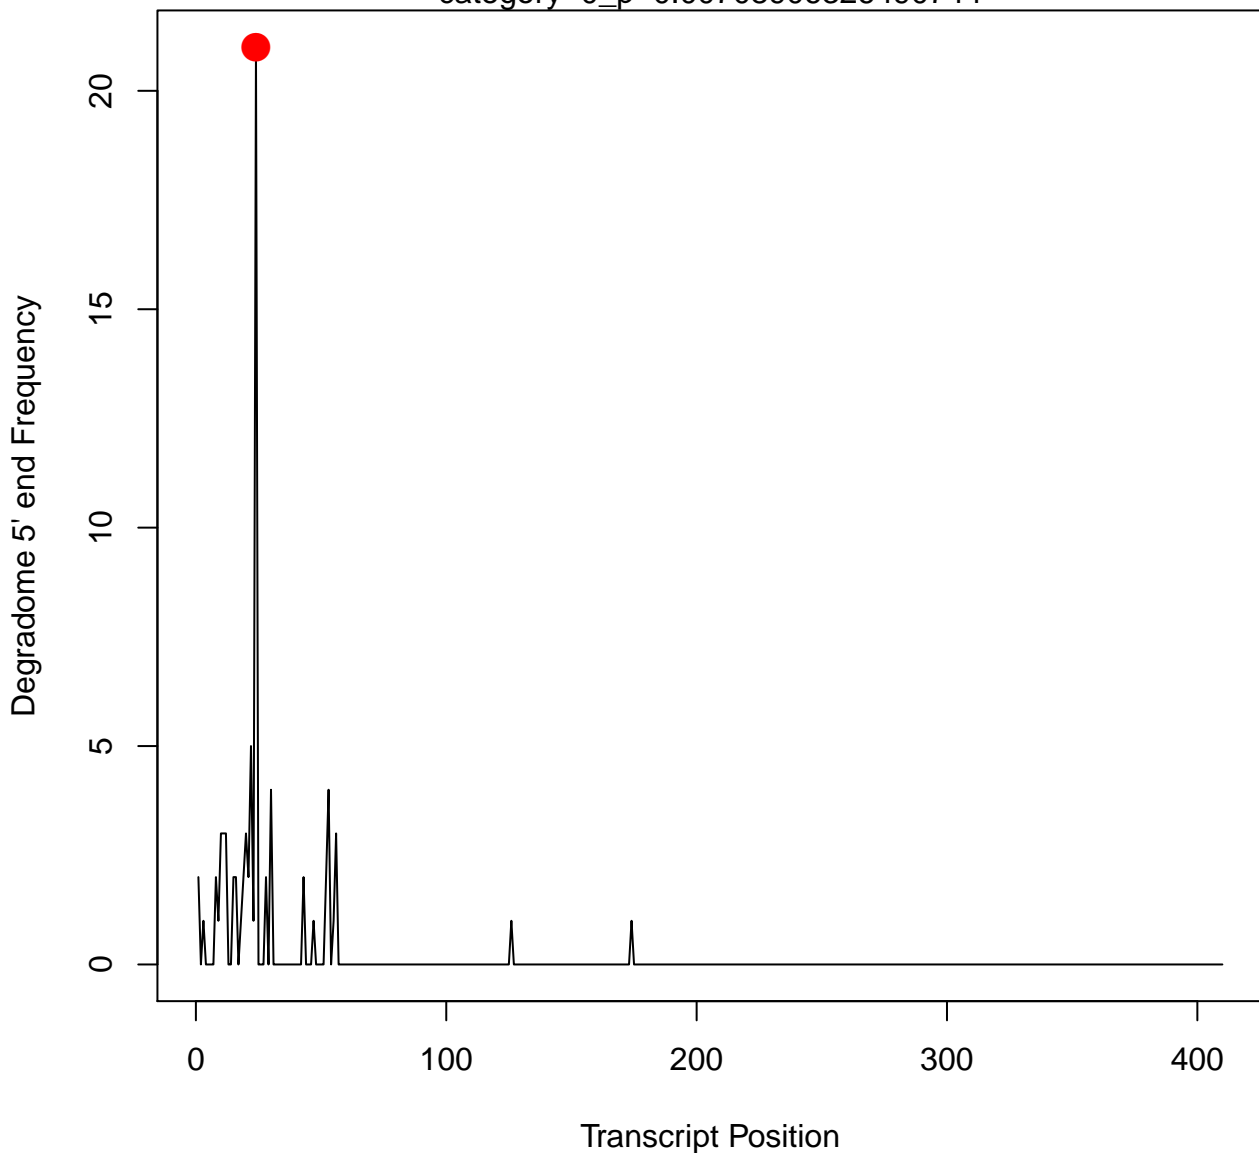

Supplement: s1 [file s1]

**T=Cluster-18410.112721\_Q=novel\_101\_S=632**

category=2\_p=0.0887427285779705

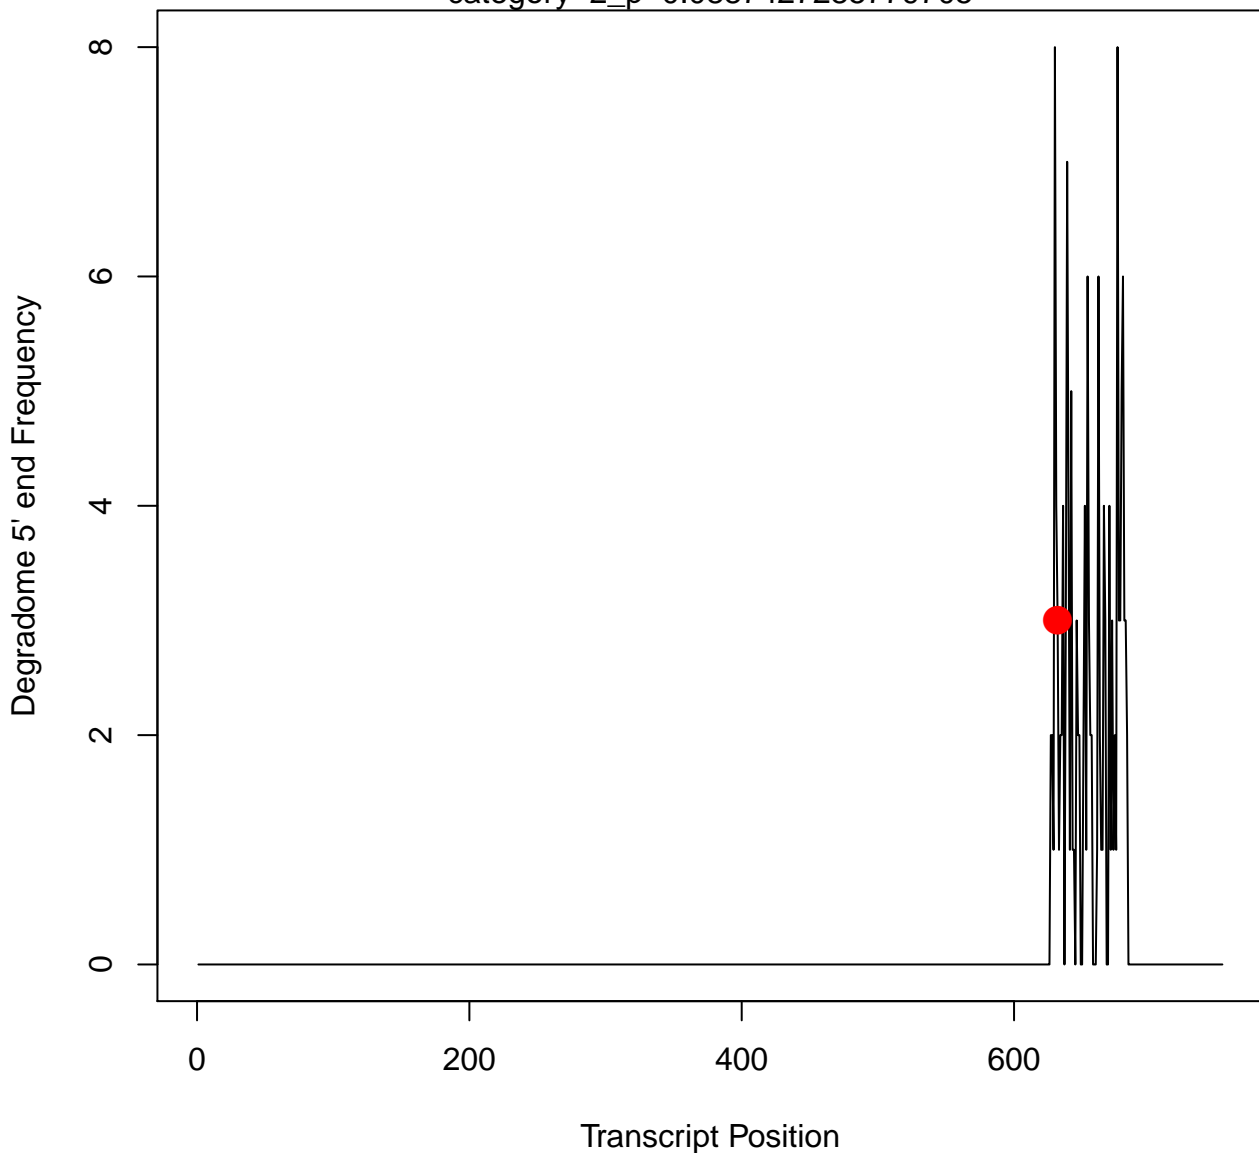

Supplement: s1 [file s1]

**T=Cluster-18410.90022\_Q=novel\_88\_S=224**

category=4\_p=0.0942809831727407

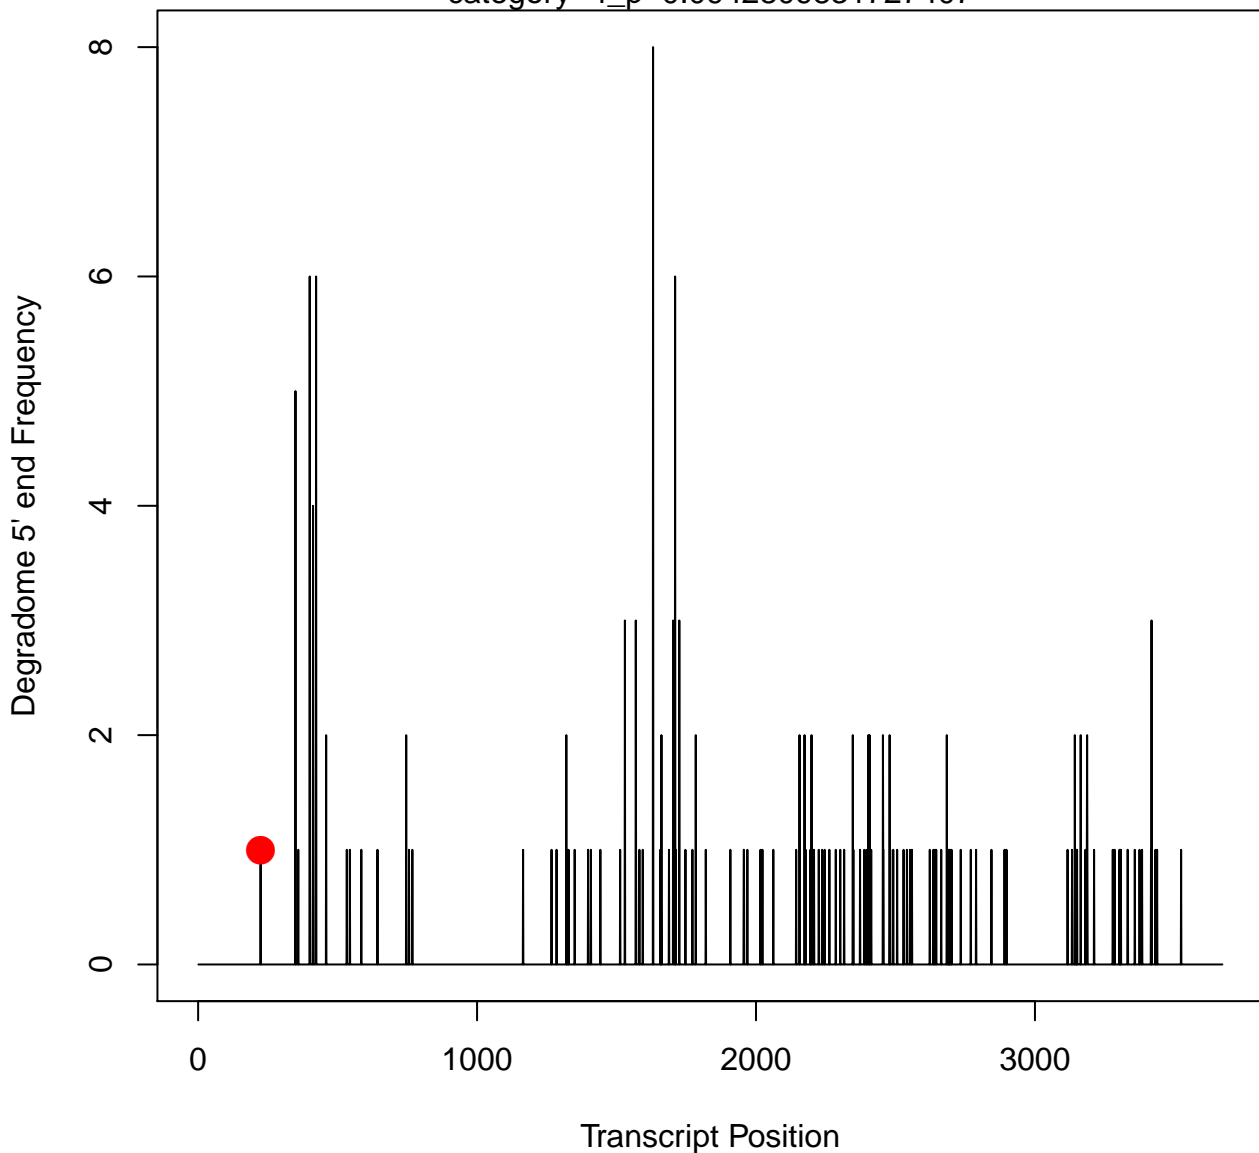

Supplement: s1 [file s1]

**T=Cluster-18410.73820\_Q=novel\_123\_S=2056**

category=2\_p=0.0673240995462872

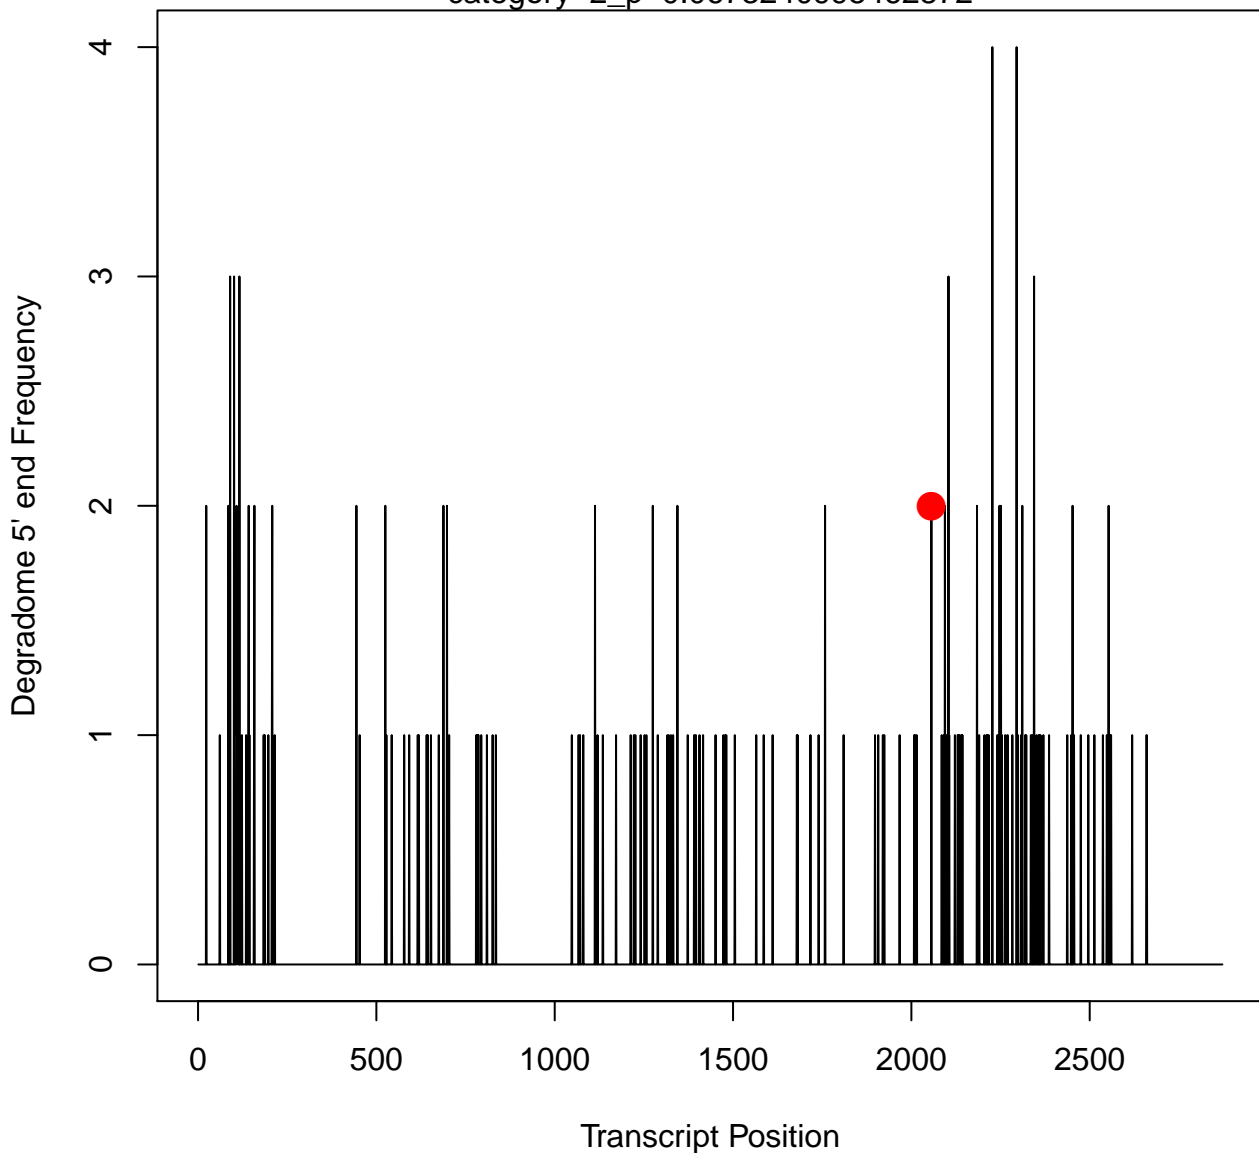

Supplement: s1 [file s1]

**T=Cluster-18410.81680\_Q=novel\_38\_S=375**

category=1\_p=0.0992301145610438

Degradome 5' end Frequency

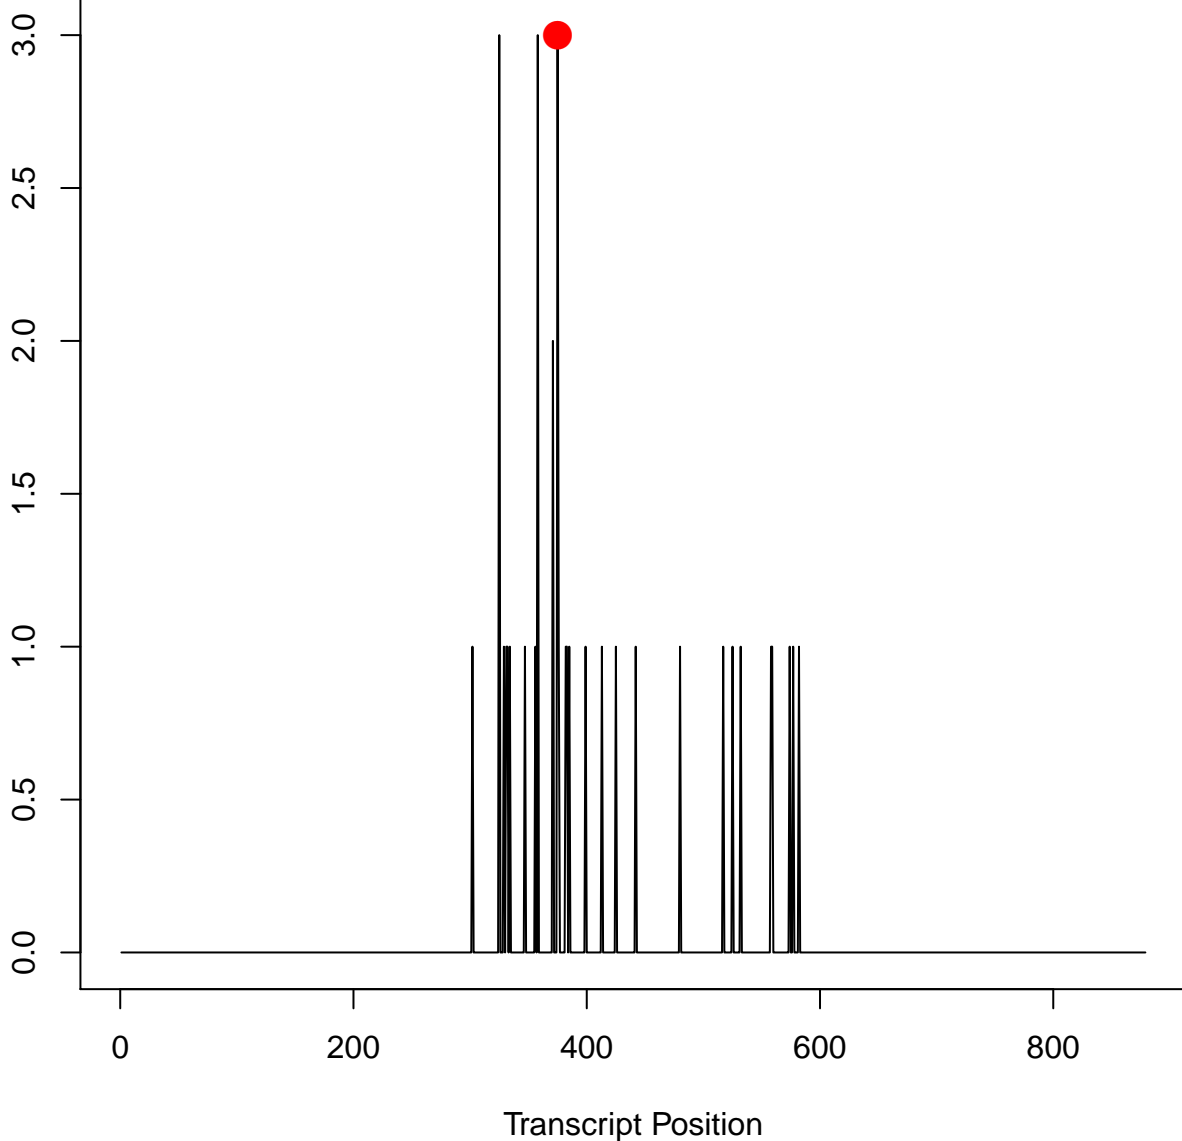

Supplement: s1 [file s1]

**T=Cluster-18410.107040\_Q=novel\_74\_S=479**

category=0\_p=0.00382345425486719

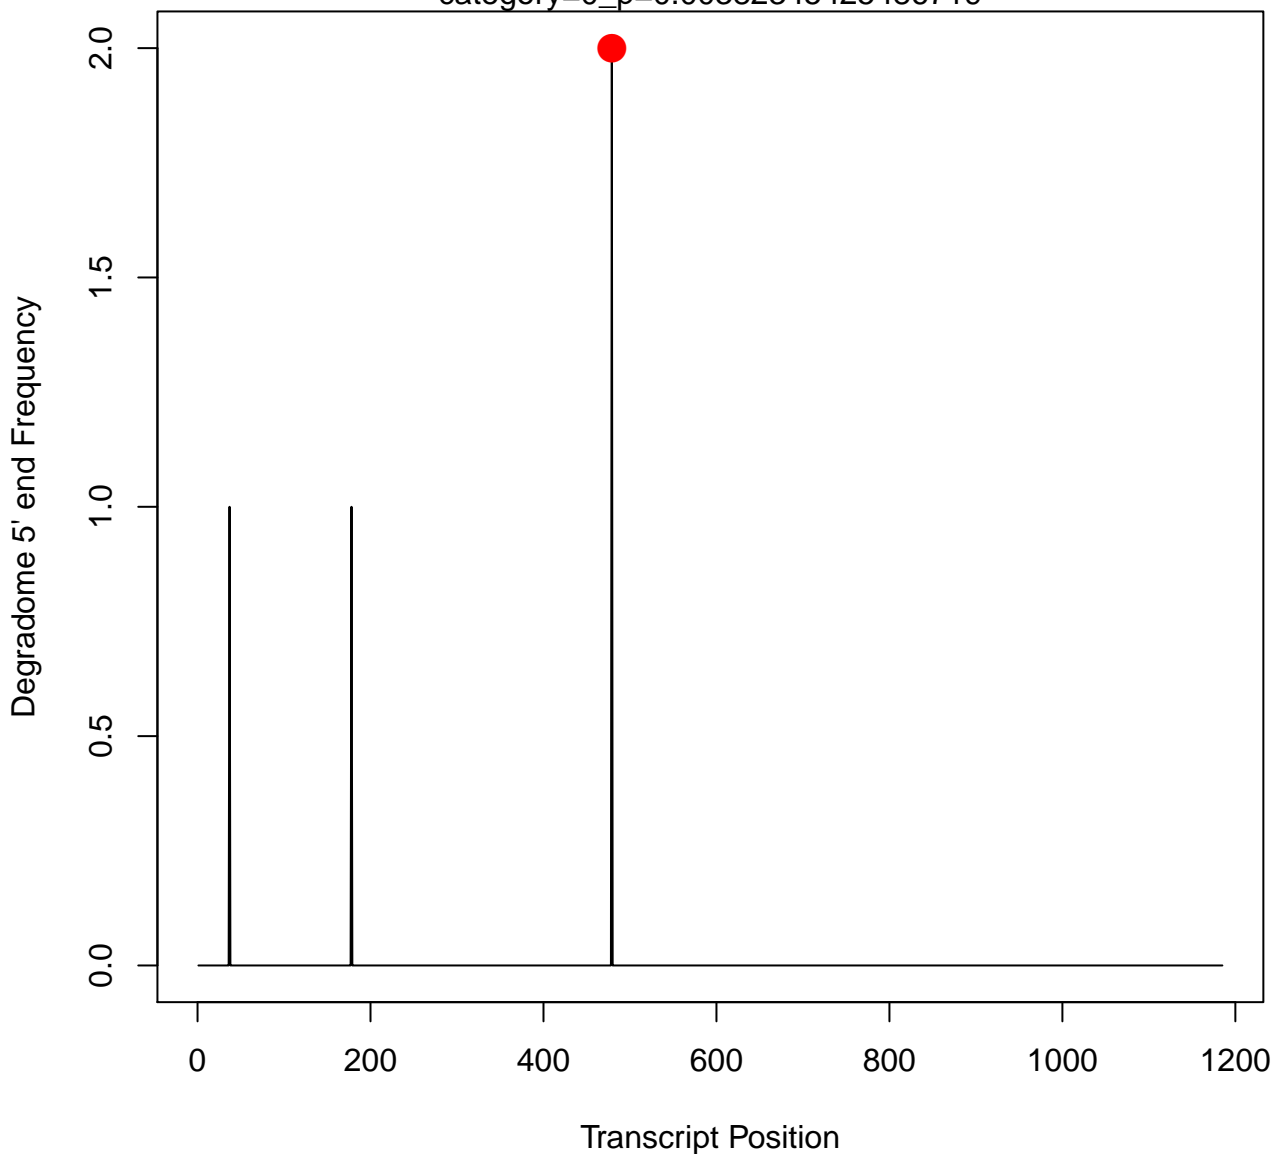

Supplement: s1 [file s1]

**T=Cluster-18410.9619\_Q=pma-miR947\_S=57**

category=0\_p=0.00164041690342198

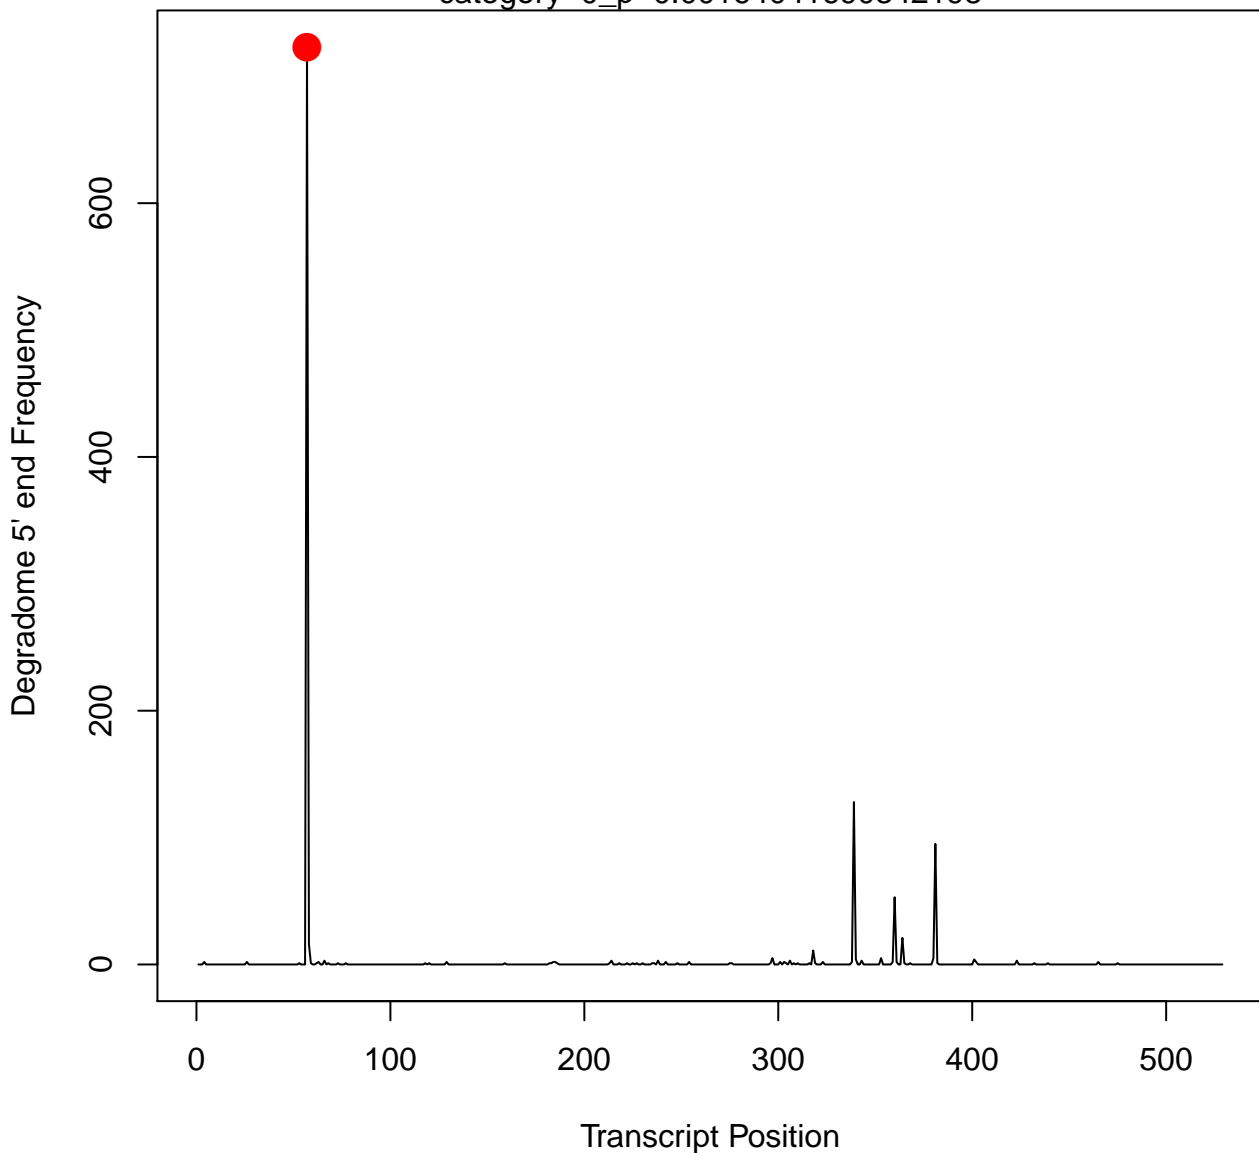

Supplement: s1 [file s1]

**T=Cluster-18410.8092\_Q=pma-miR1316\_S=2987**

category=0\_p=0.00027358987754178

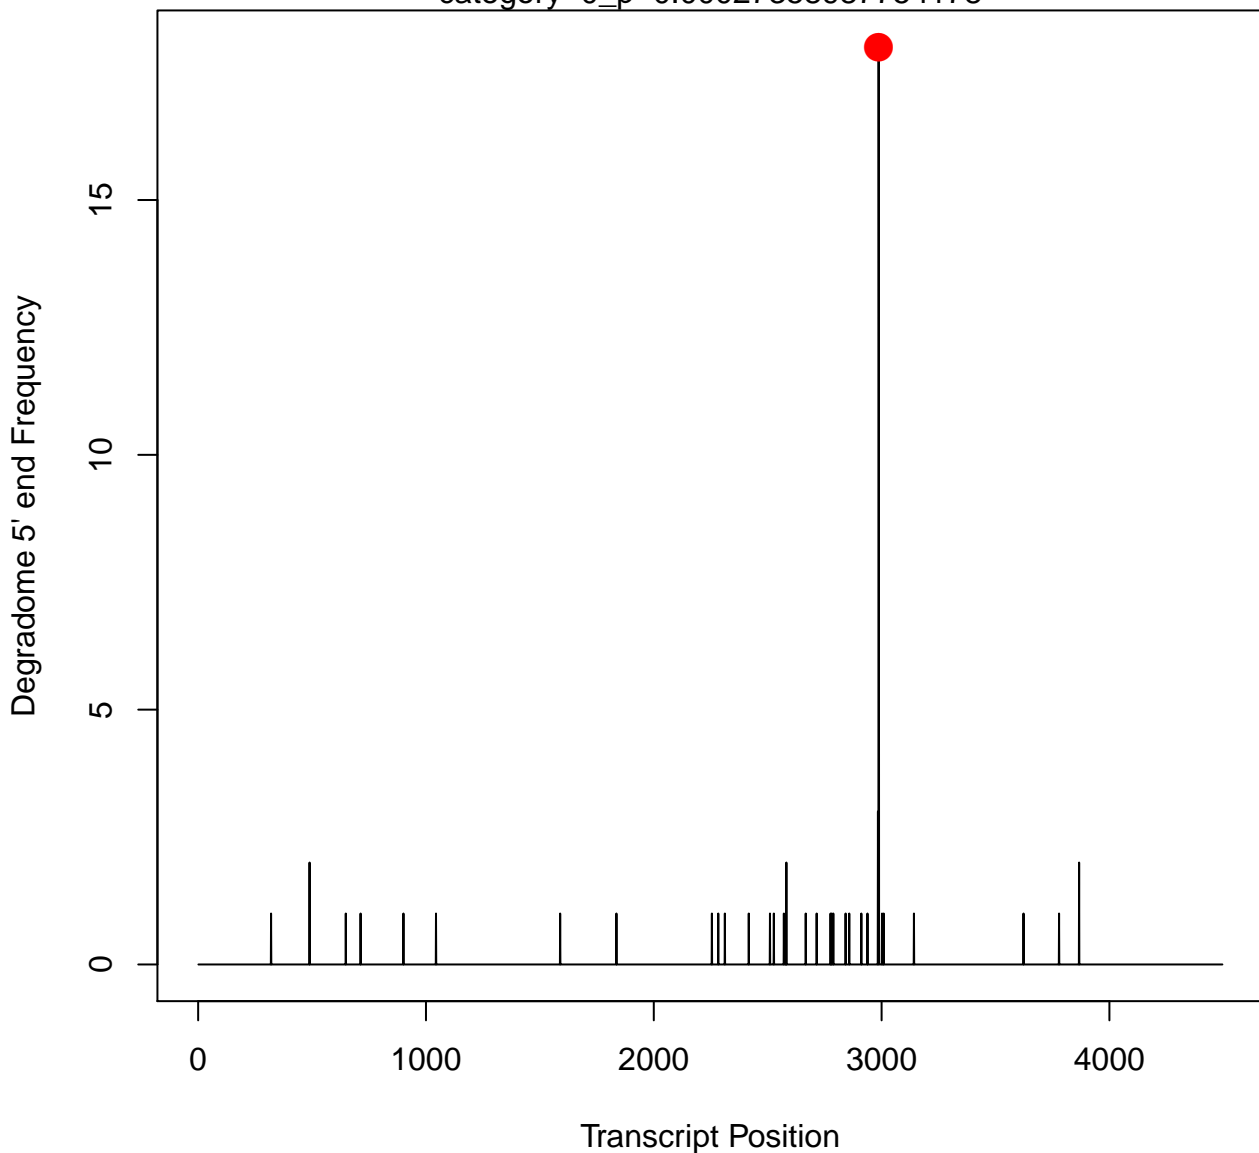

Supplement: s1 [file s1]

**T=Cluster-18410.78483\_Q=novel\_144\_S=937**

category=4\_p=0.024452609380235

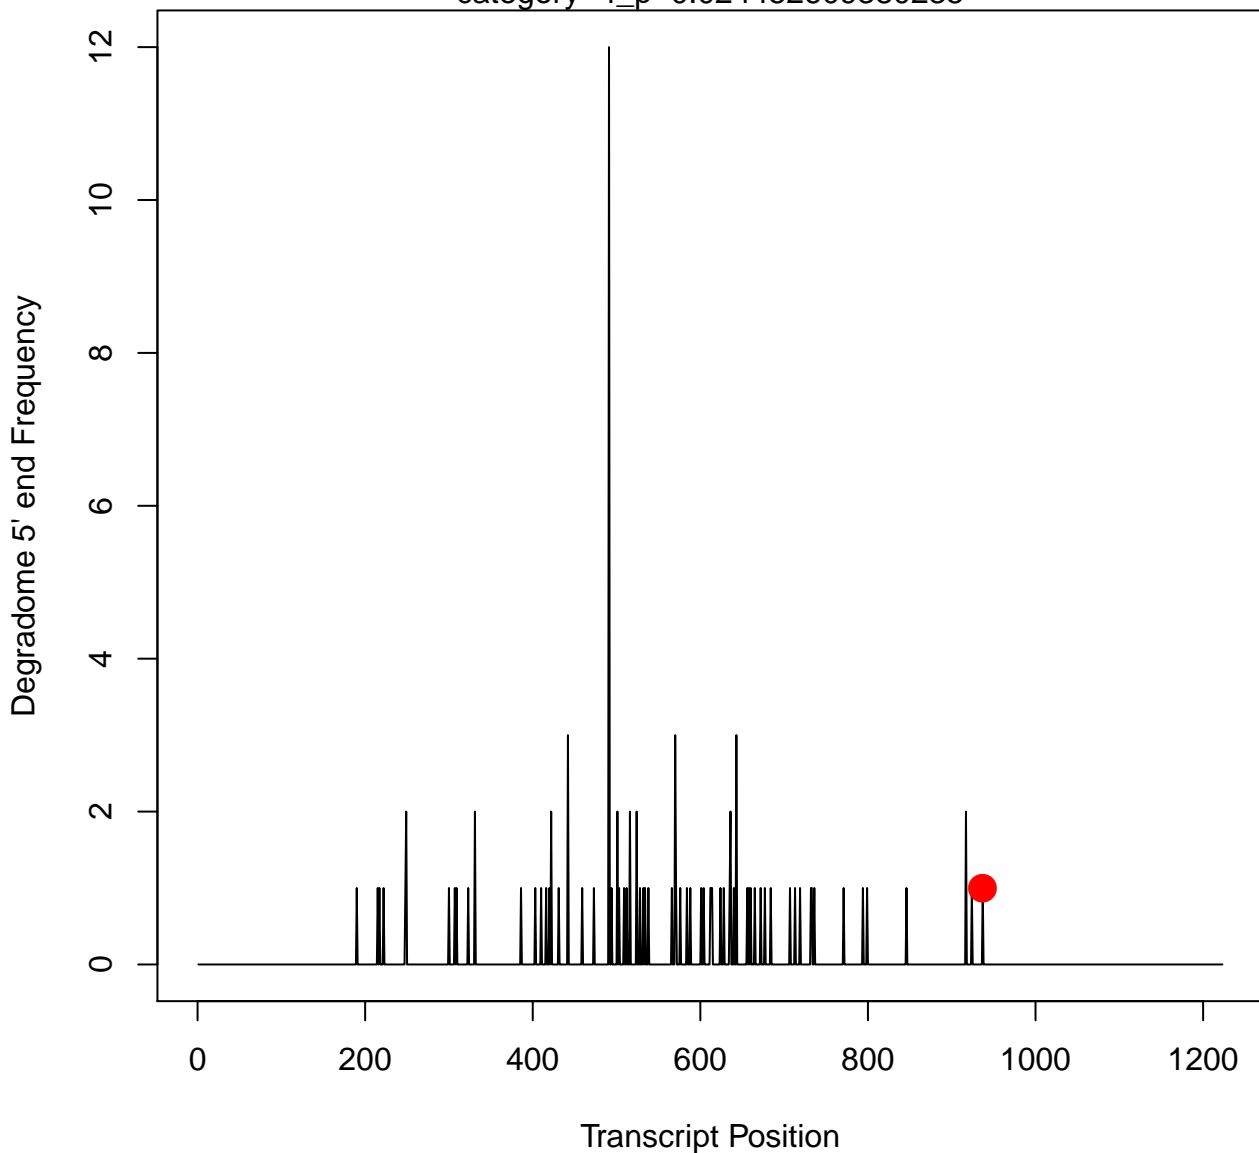

Supplement: s1 [file s1]

**T=Cluster-18410.85402\_Q=novel\_143\_S=1388**

category=0\_p=0.00218662432695249

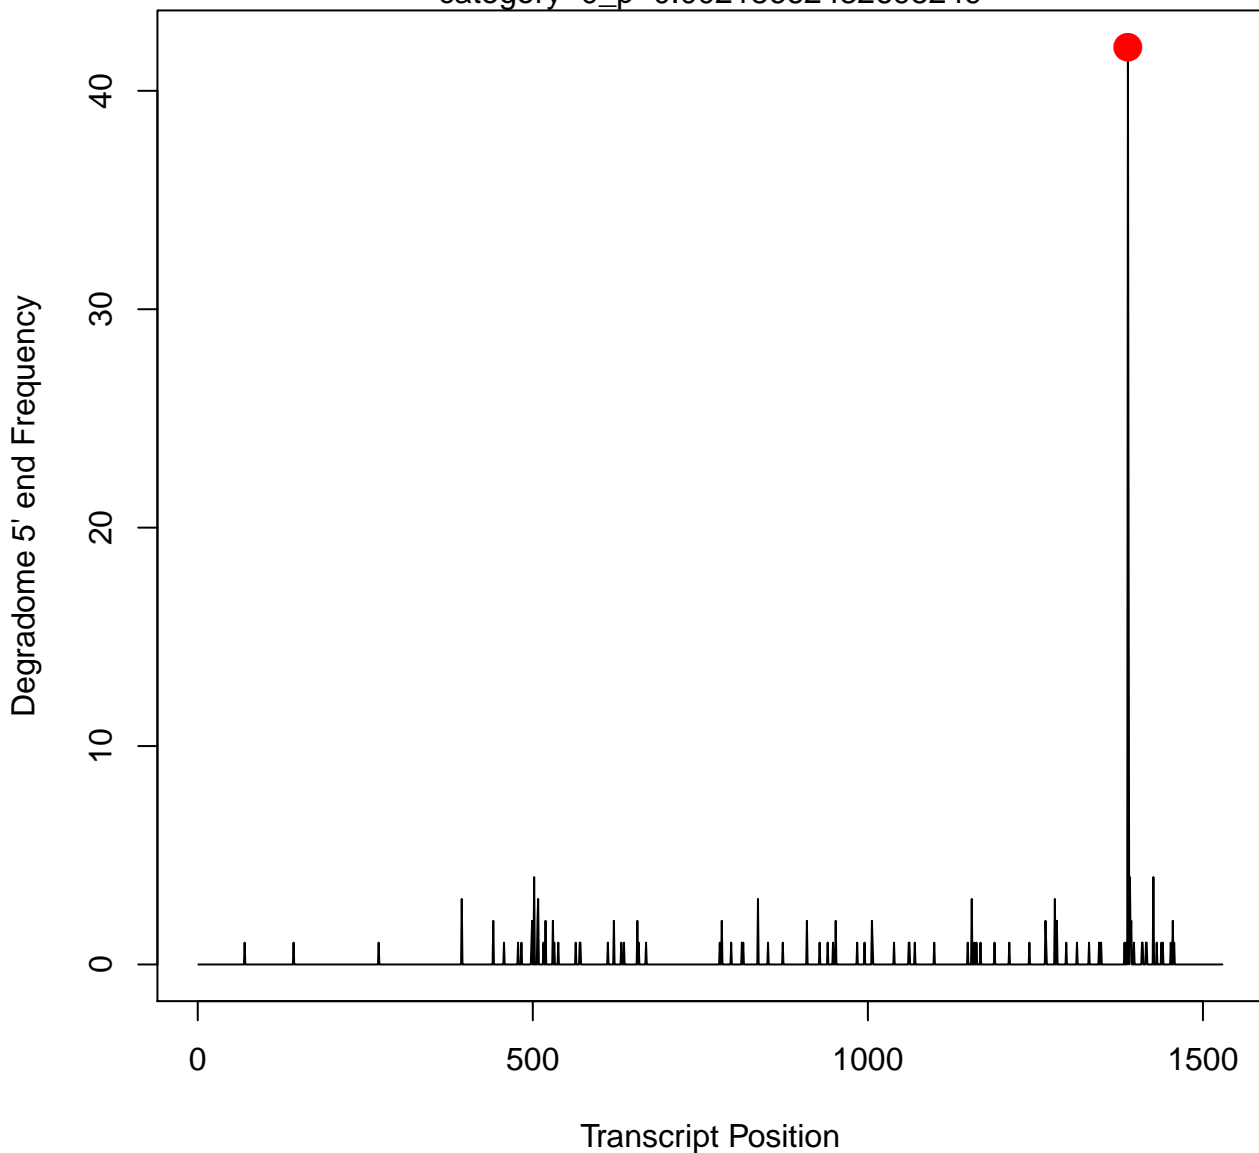

Supplement: s1 [file s1]

**T=Cluster-19203.0\_Q=novel\_42\_S=107**

category=0\_p=0.00926018647366955

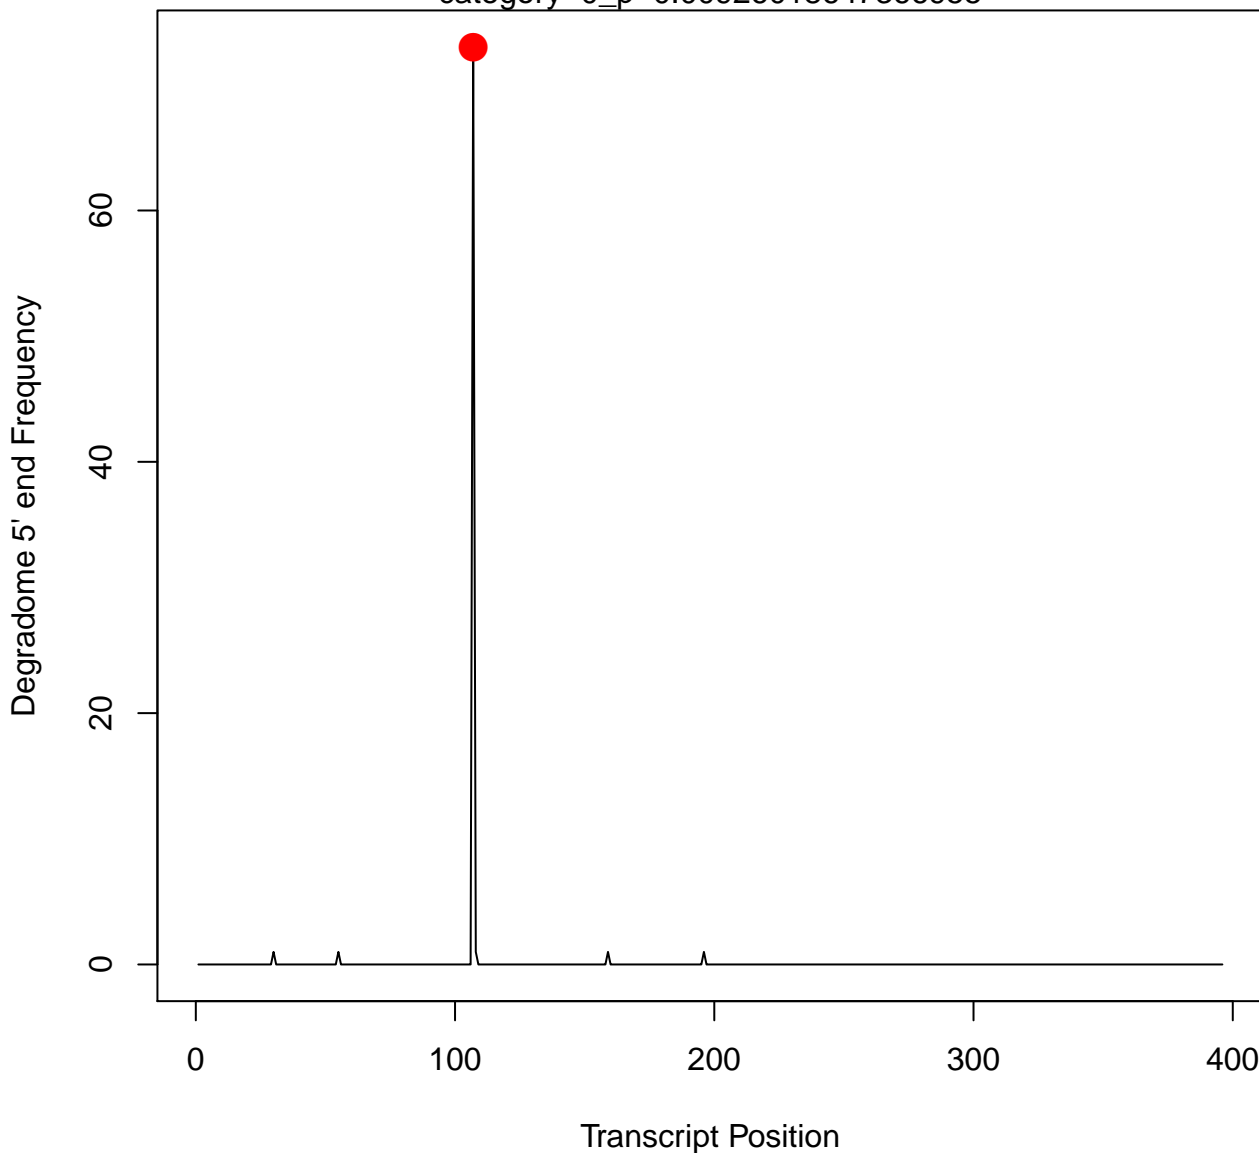

Supplement: s1 [file s1]

**T=Cluster-18410.73101\_Q=novel\_64\_S=292**

category=2\_p=0.0673240995462872

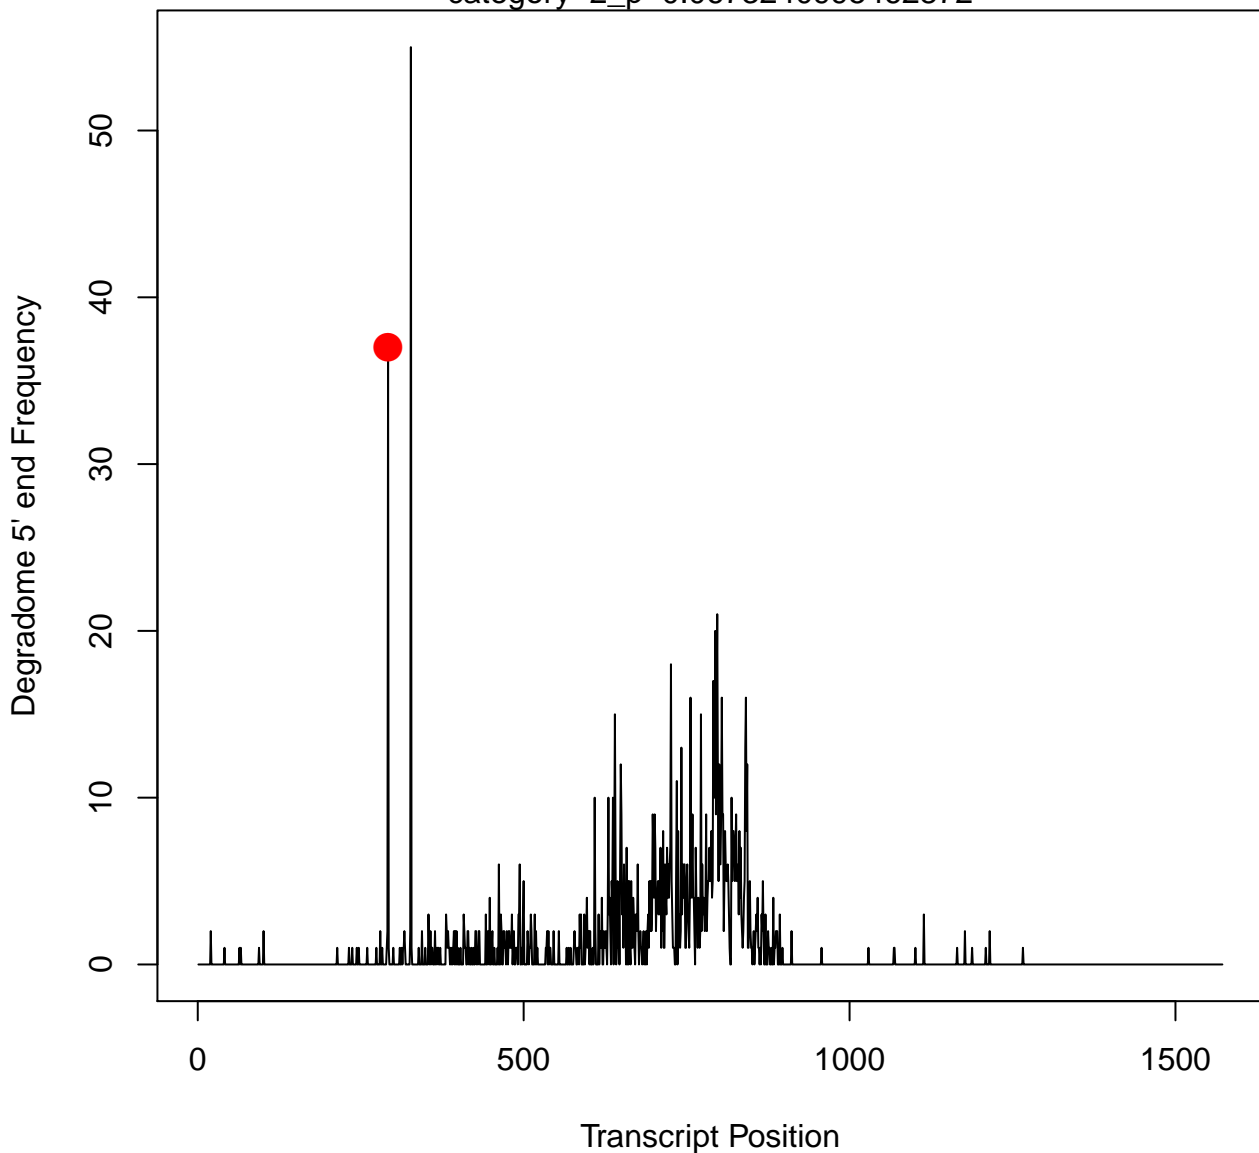

Supplement: s1 [file s1]

**T=Cluster-18410.103782\_Q=novel\_20\_S=208**

category=1\_p=0.021600259992404

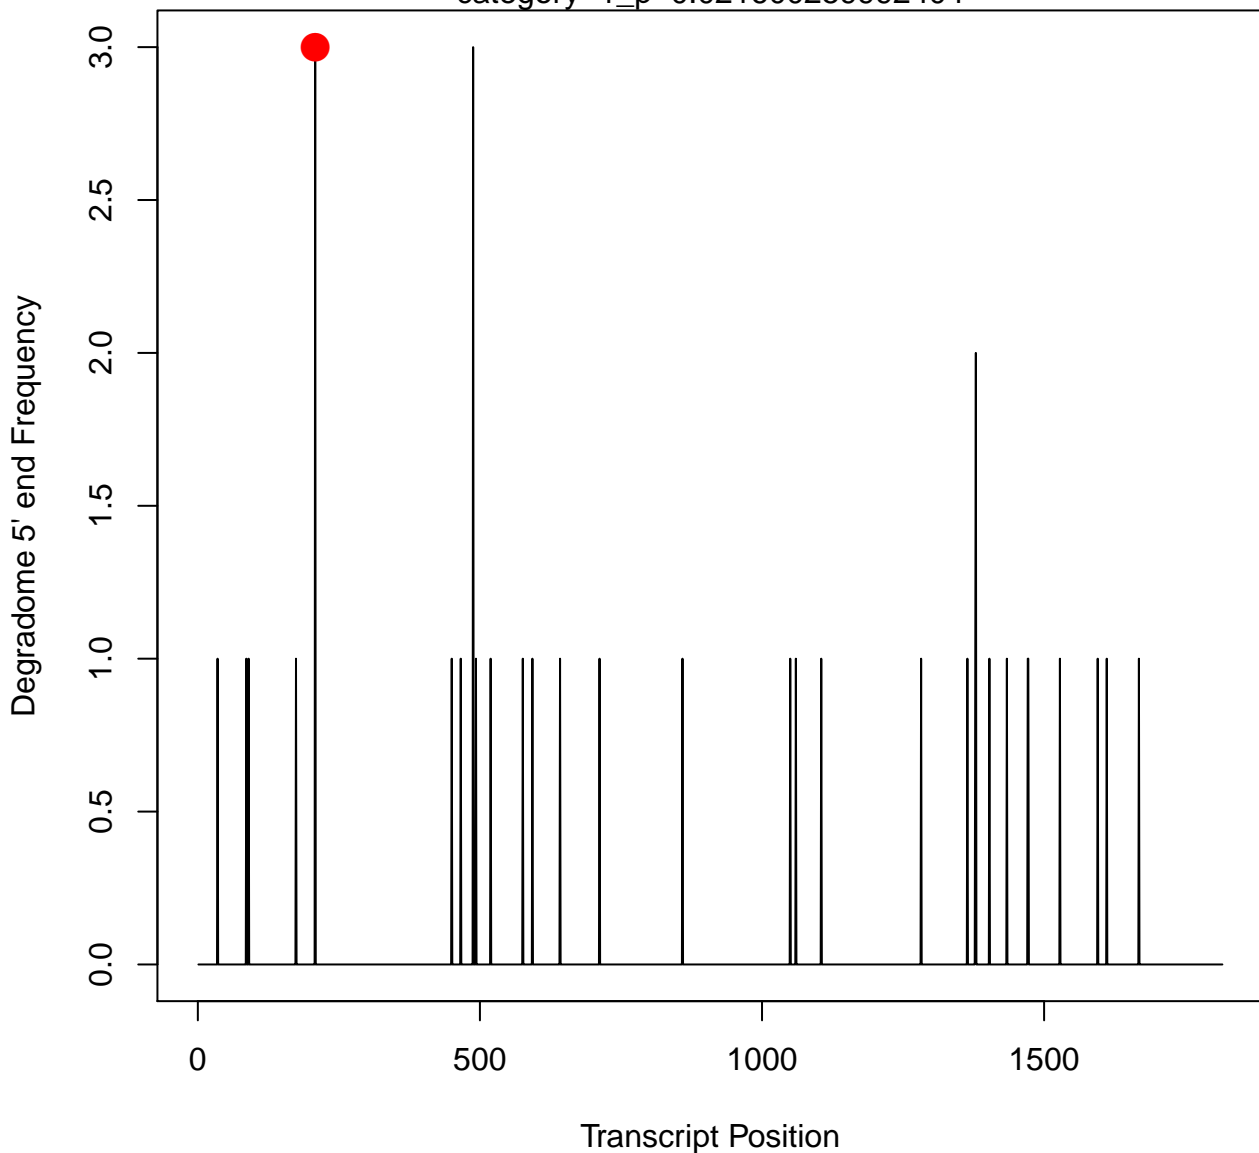

Supplement: s1 [file s1]

**T=Cluster-18410.113893\_Q=novel\_42\_S=120**

category=0\_p=0.000820545098840553

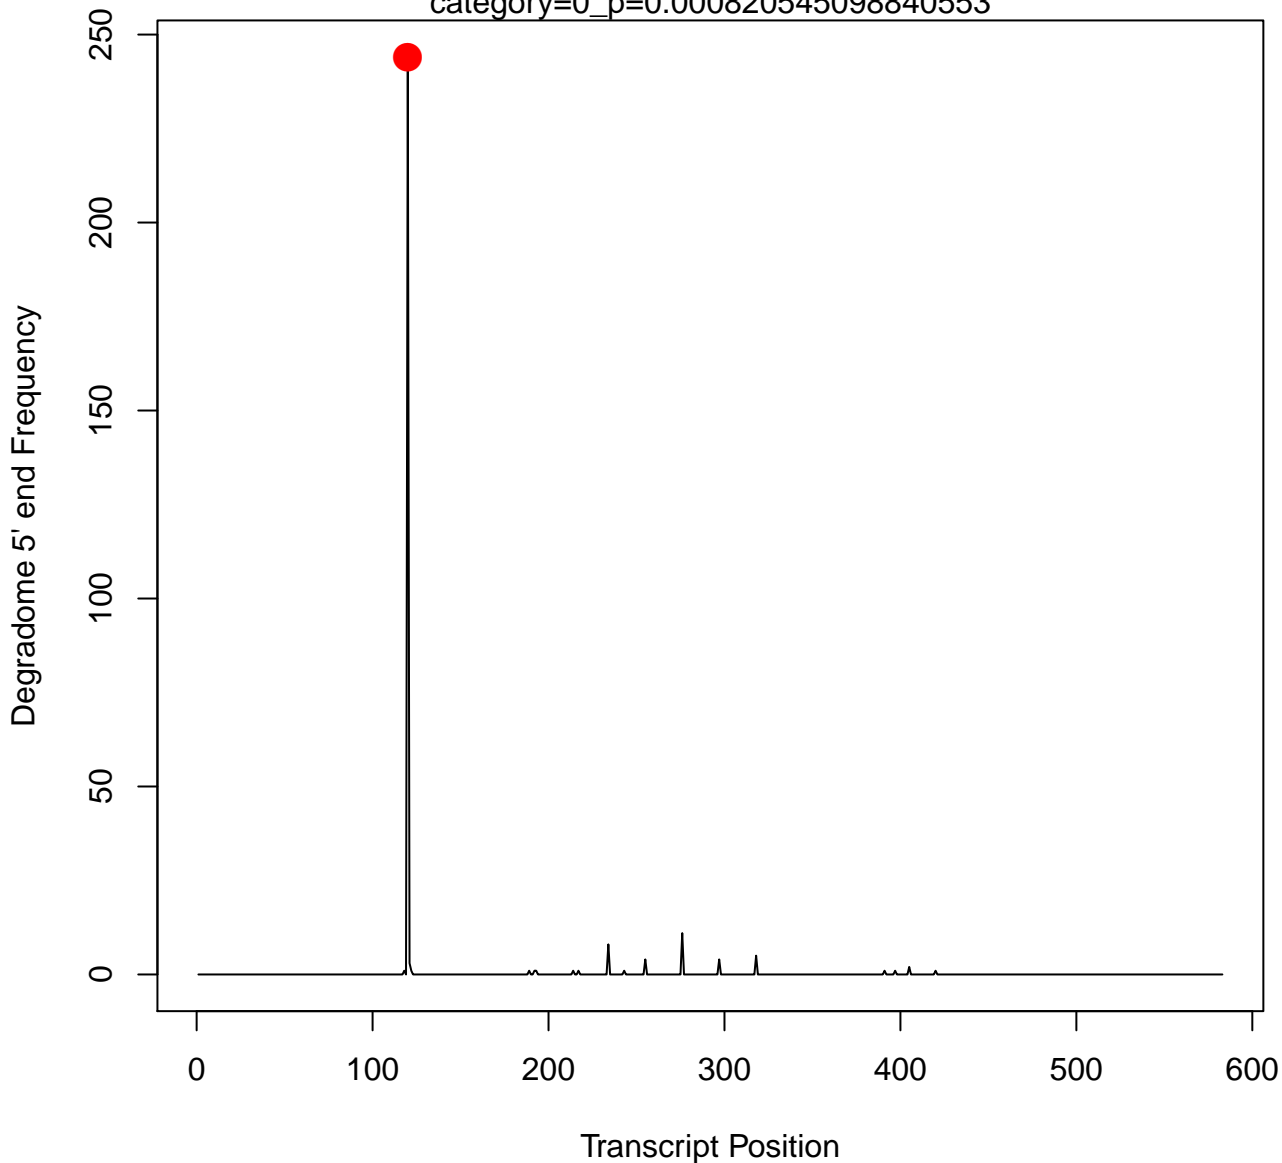

Supplement: s1 [file s1]

**T=Cluster-18410.76113\_Q=novel\_11\_S=364**

category=0\_p=0.0203129041554919

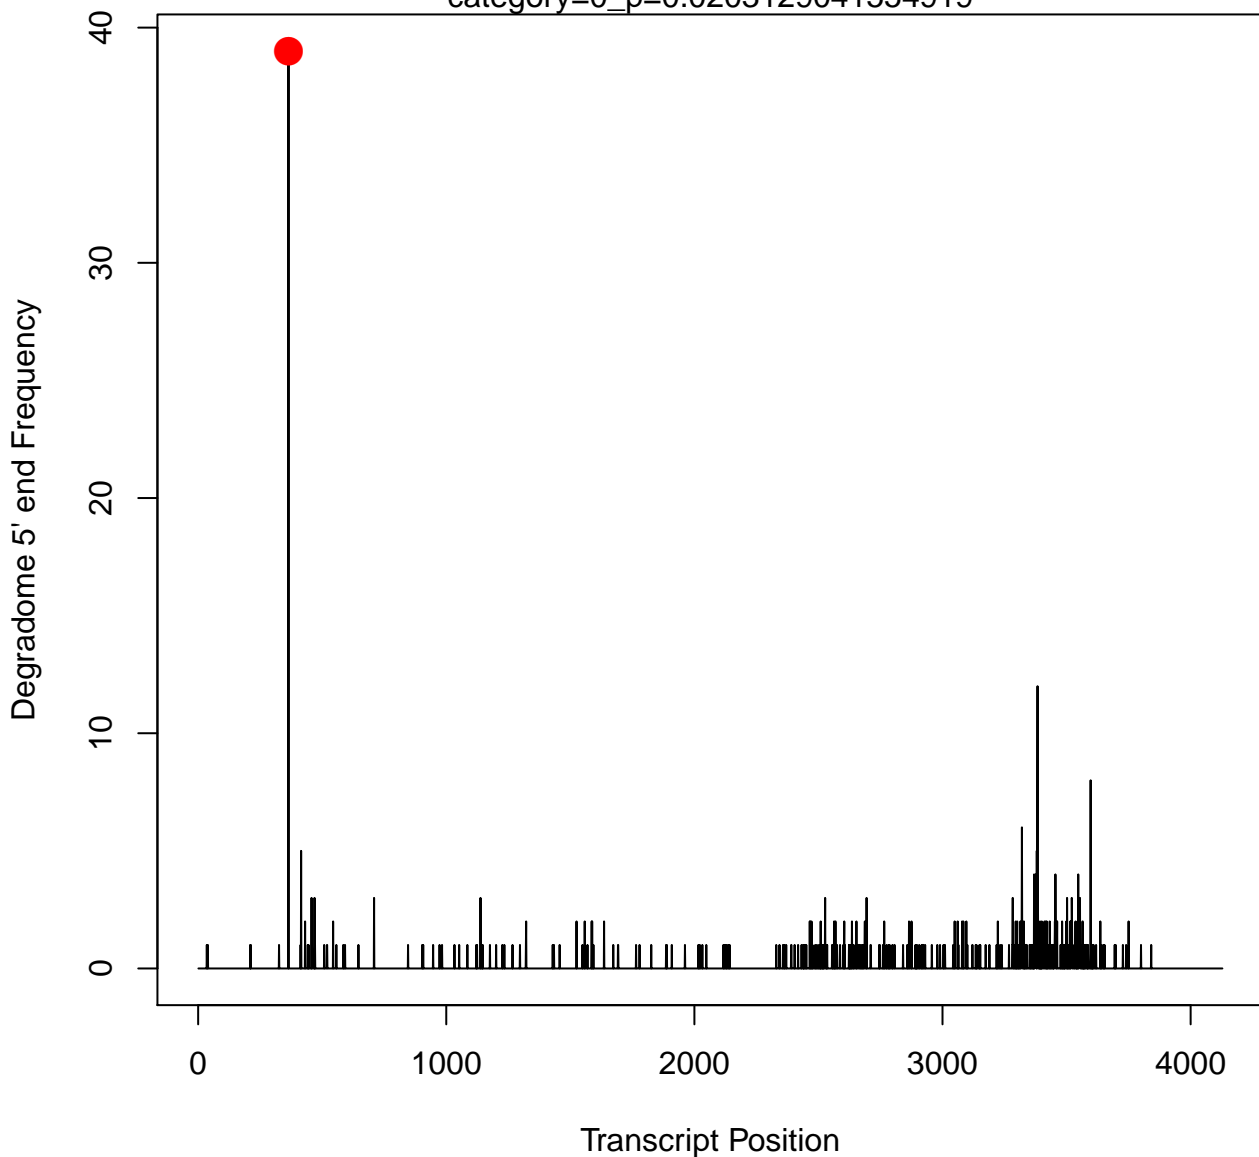

Supplement: s1 [file s1]

**T=Cluster-18410.96430\_Q=novel\_2\_S=787**

category=0\_p=0.00355083585007077

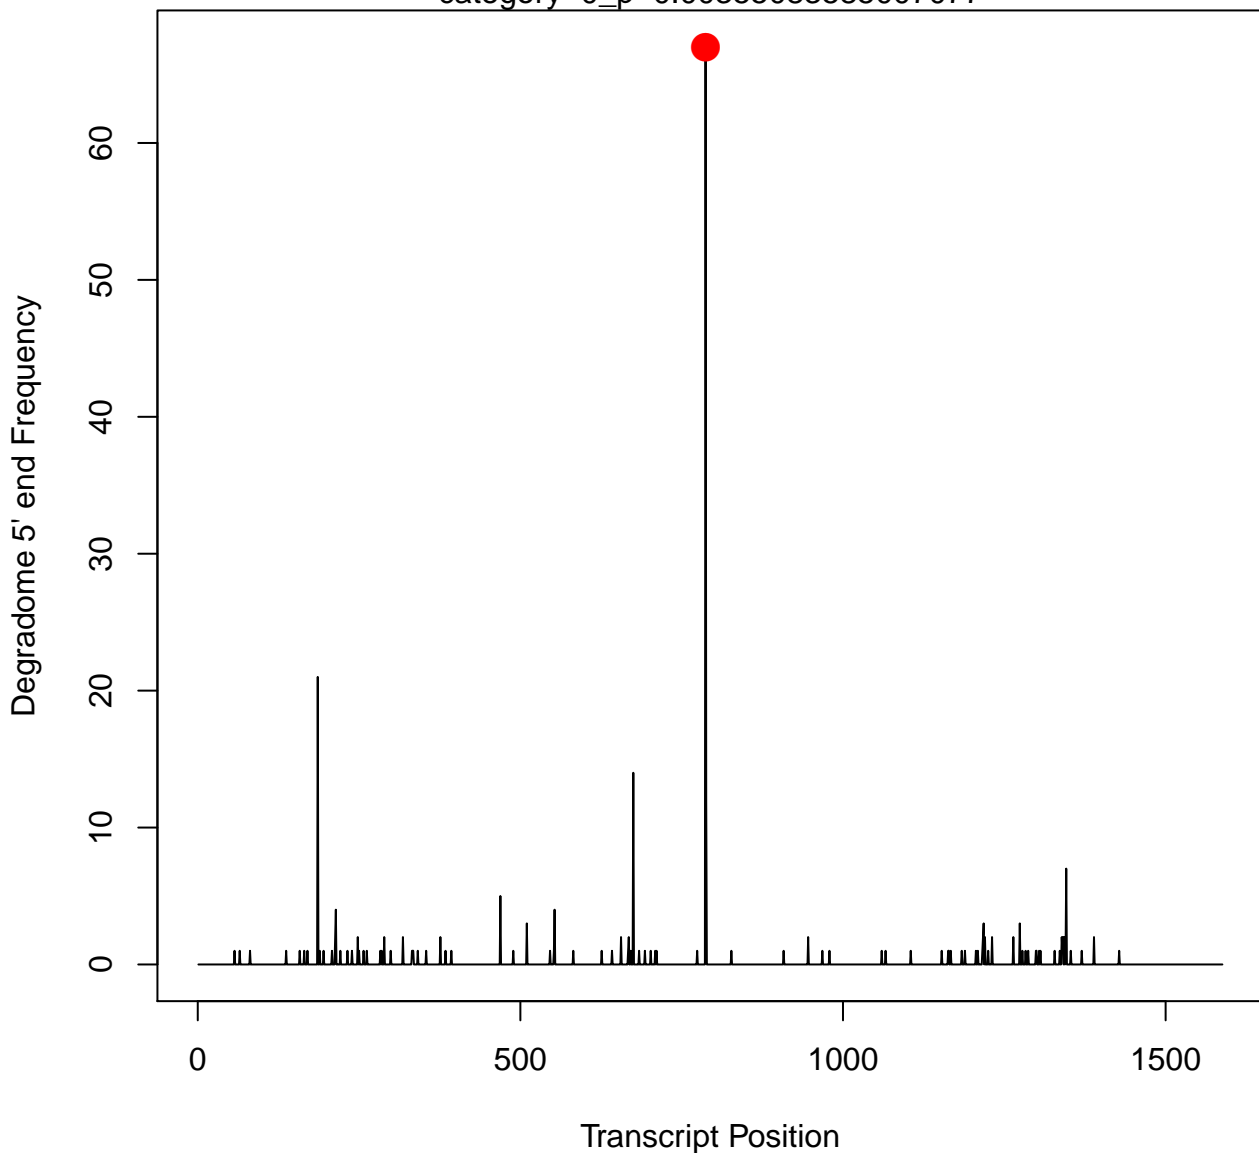

Supplement: s1 [file s1]

**T=Cluster-18410.94486\_Q=novel\_27\_S=252**

category=0\_p=0.0267254846978155

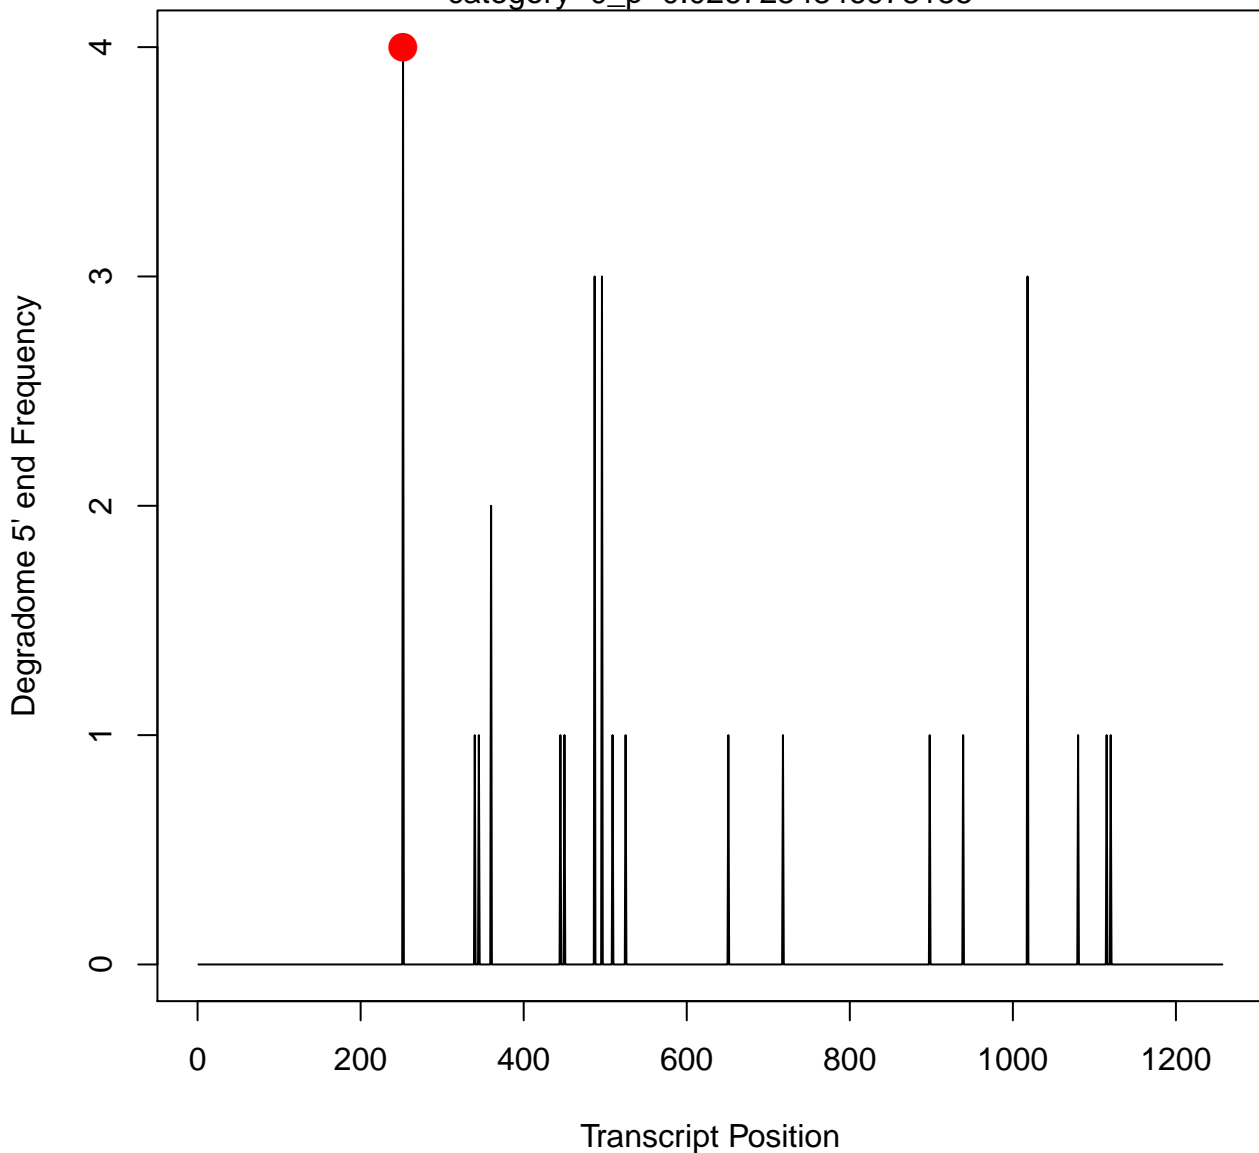

Supplement: s1 [file s1]

**T=Cluster-18410.2177\_Q=novel\_20\_S=63**

category=0\_p=0.0203129041554919

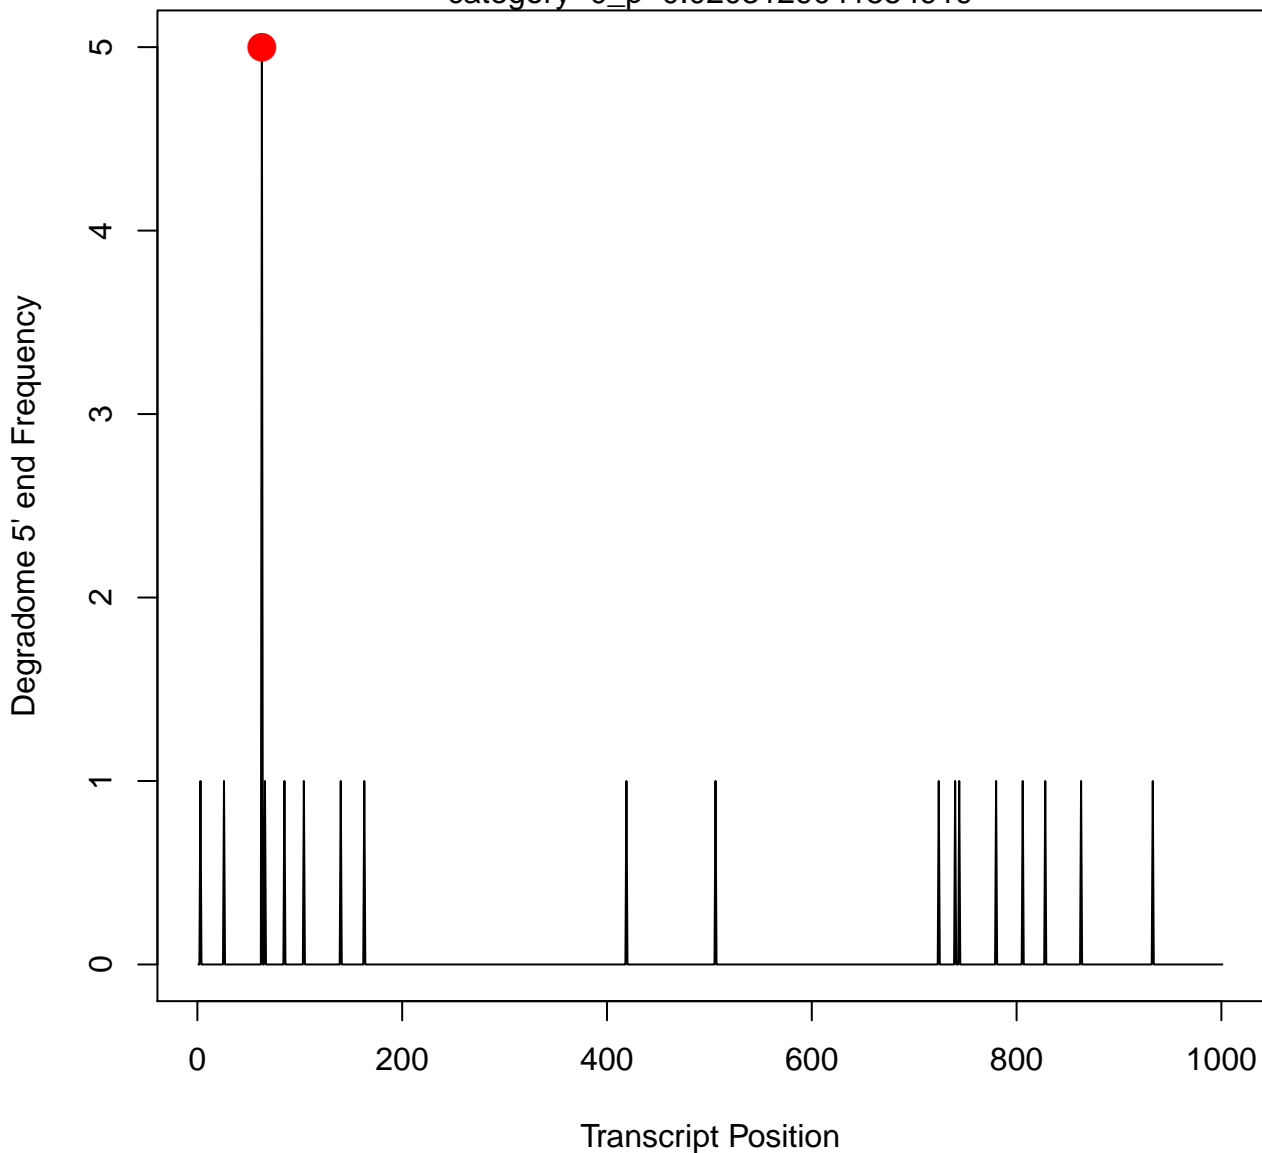

Supplement: s1 [file s1]

**T=Cluster-18410.3886\_Q=novel\_72\_S=216**

category=1\_p=0.0557837021840153

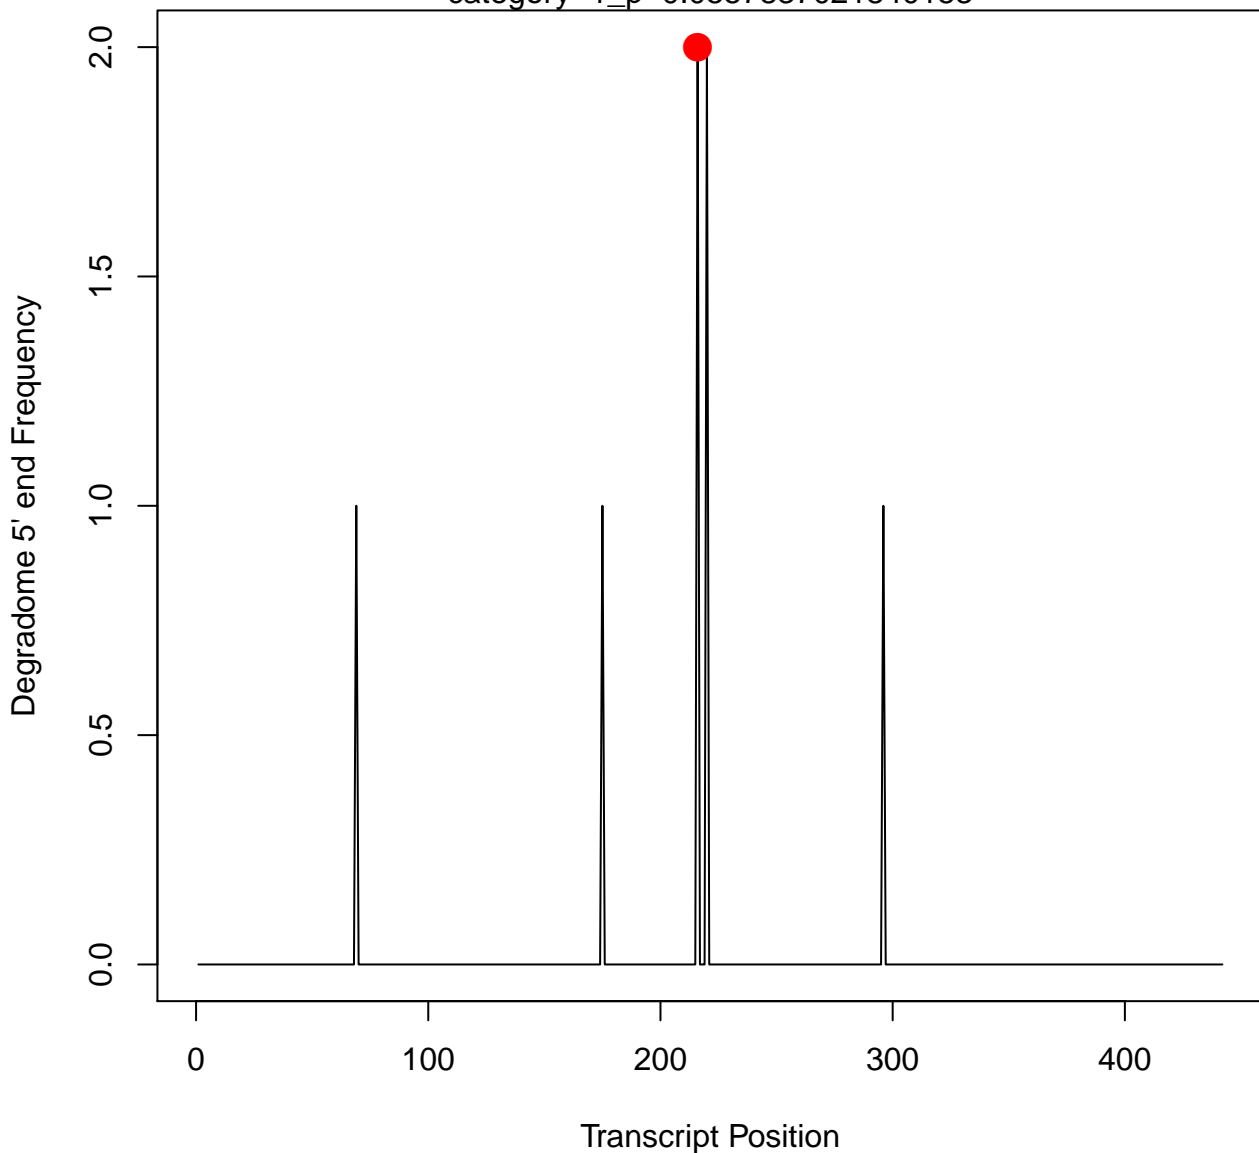

Supplement: s1 [file s1]

**T=Cluster-18410.32066\_Q=novel\_6\_S=242**

category=2\_p=0.0673240995462872

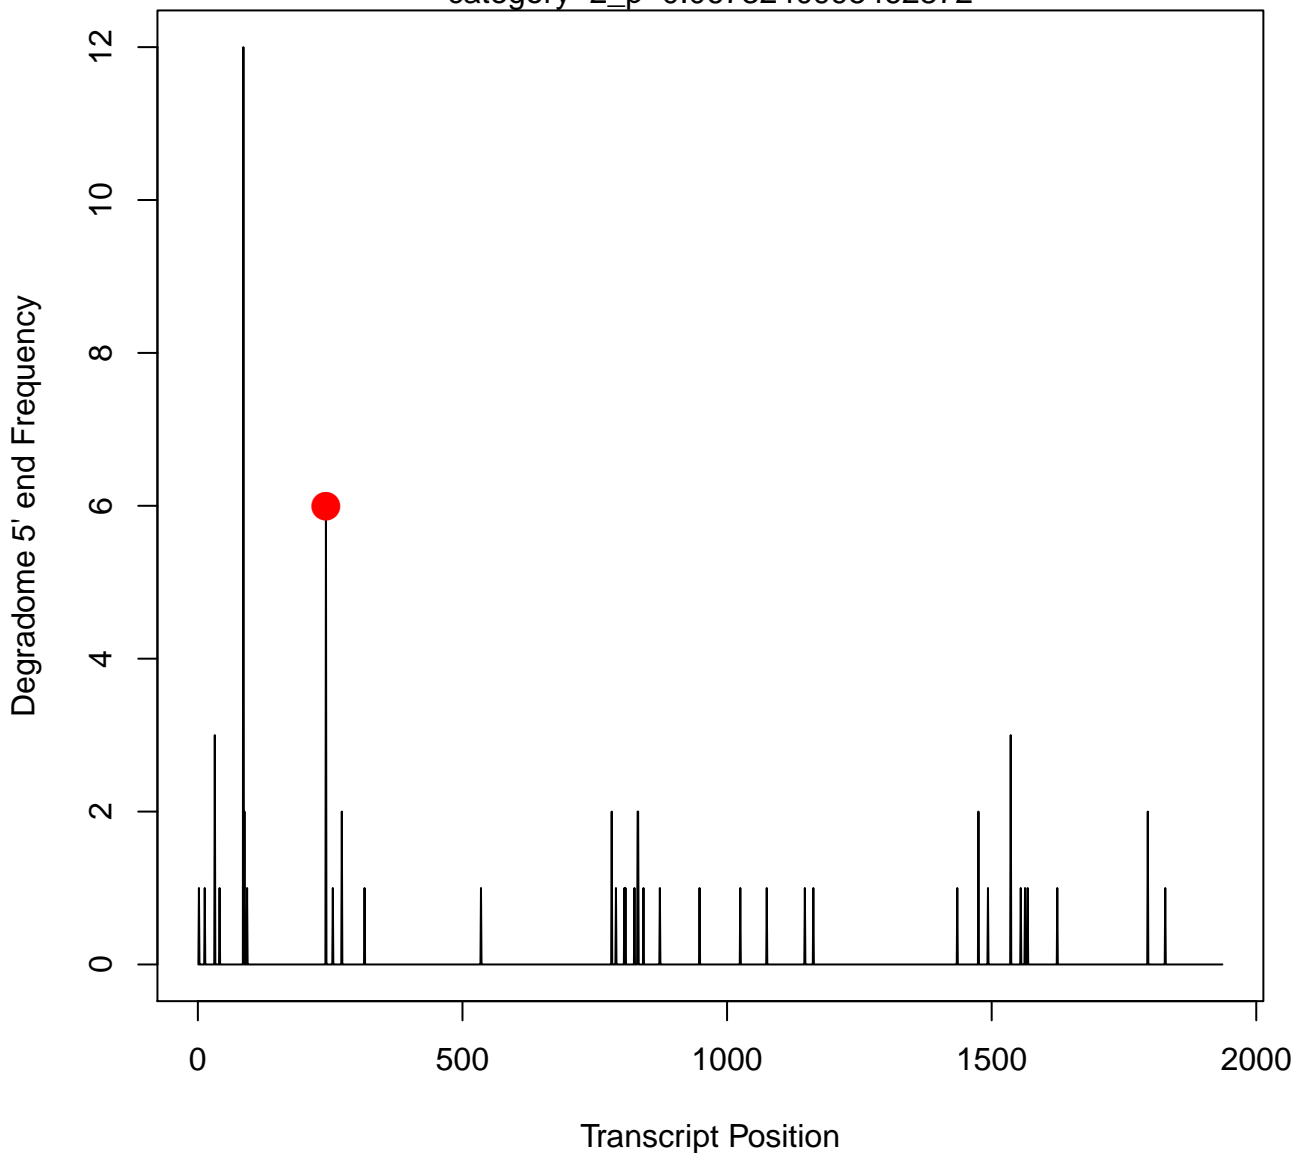

Supplement: s1 [file s1]

**T=Cluster-18410.46313\_Q=novel\_198\_S=1141**

category=0\_p=0.0805720393194507

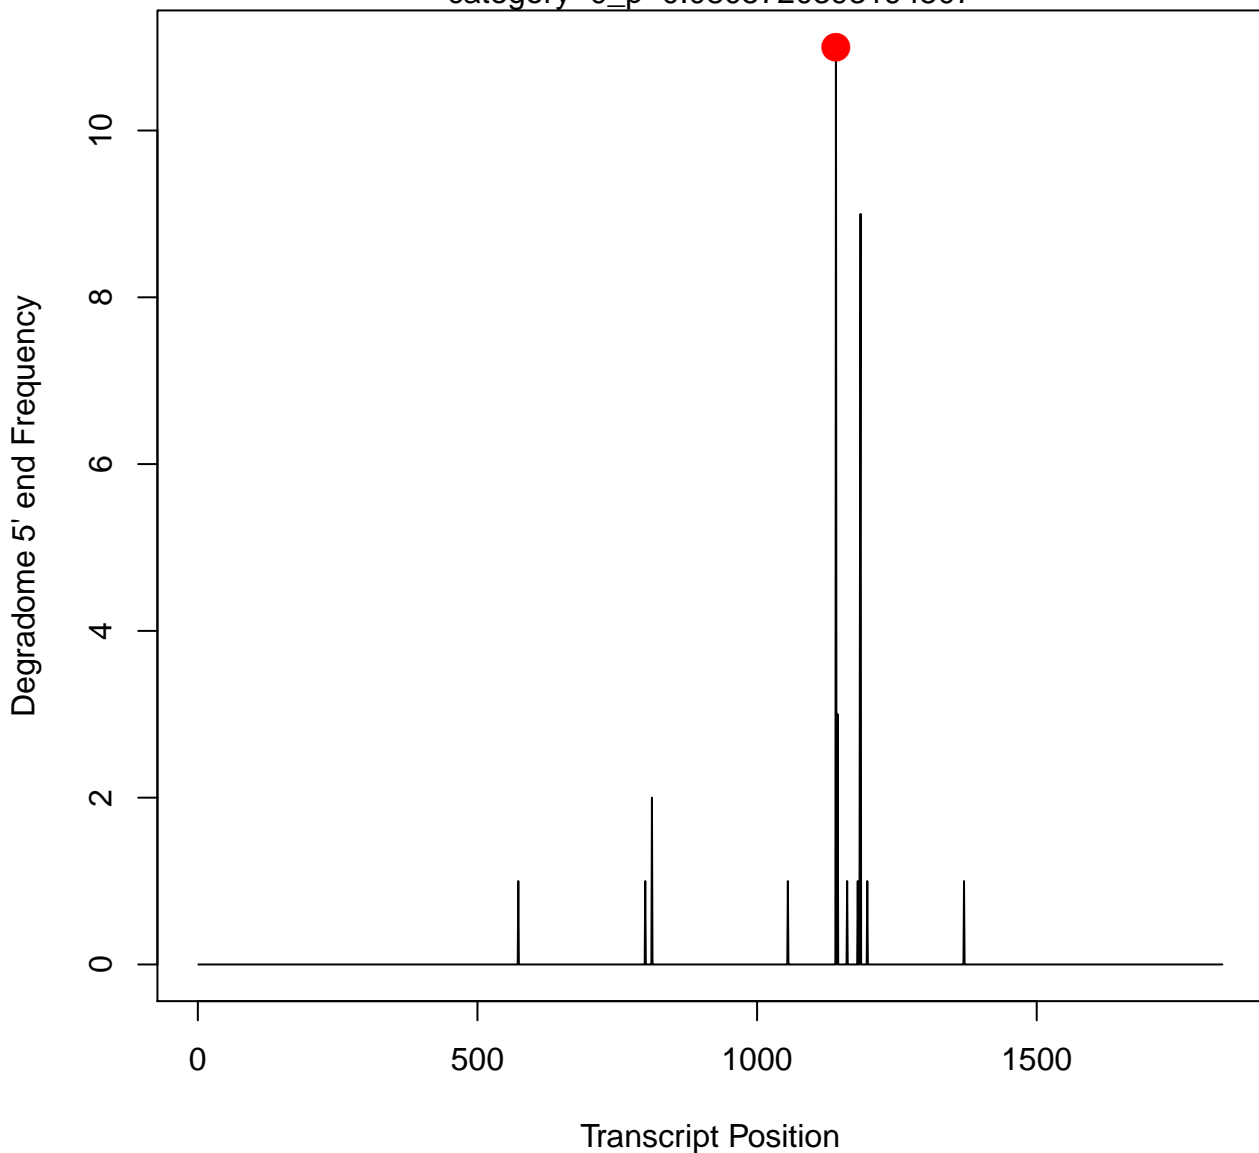

Supplement: s1 [file s1]

**T=Cluster-18410.89029\_Q=novel\_174\_S=446**

category=0\_p=0.0658639618263712

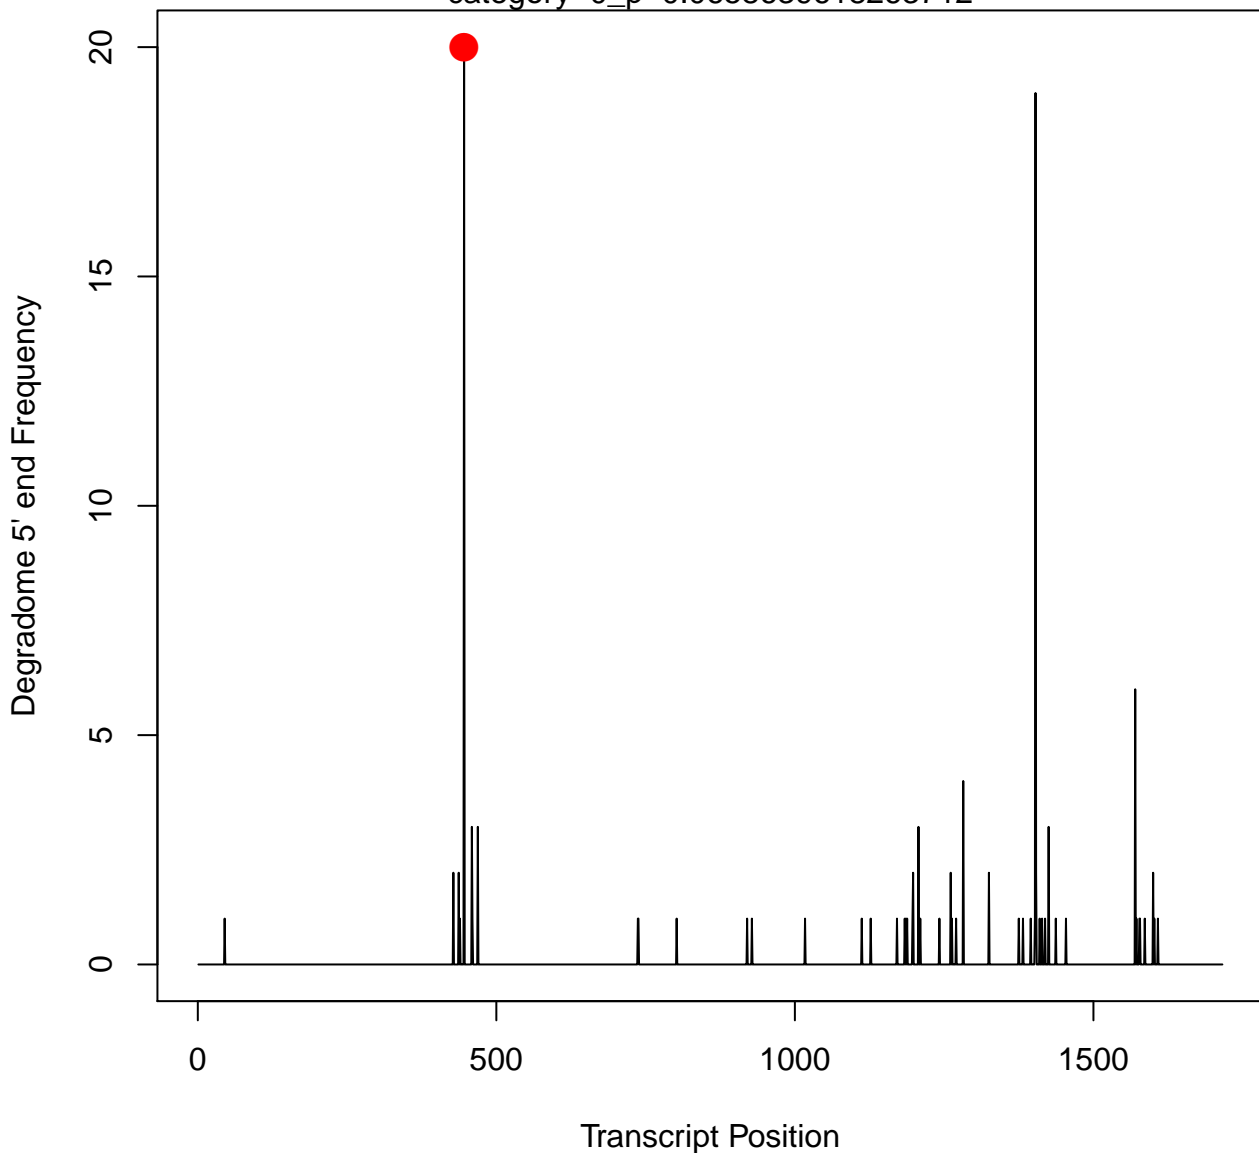

Supplement: s1 [file s1]

**T=Cluster-18410.116111\_Q=pma-miR947\_S=197**

category=0\_p=0.000820545098840553

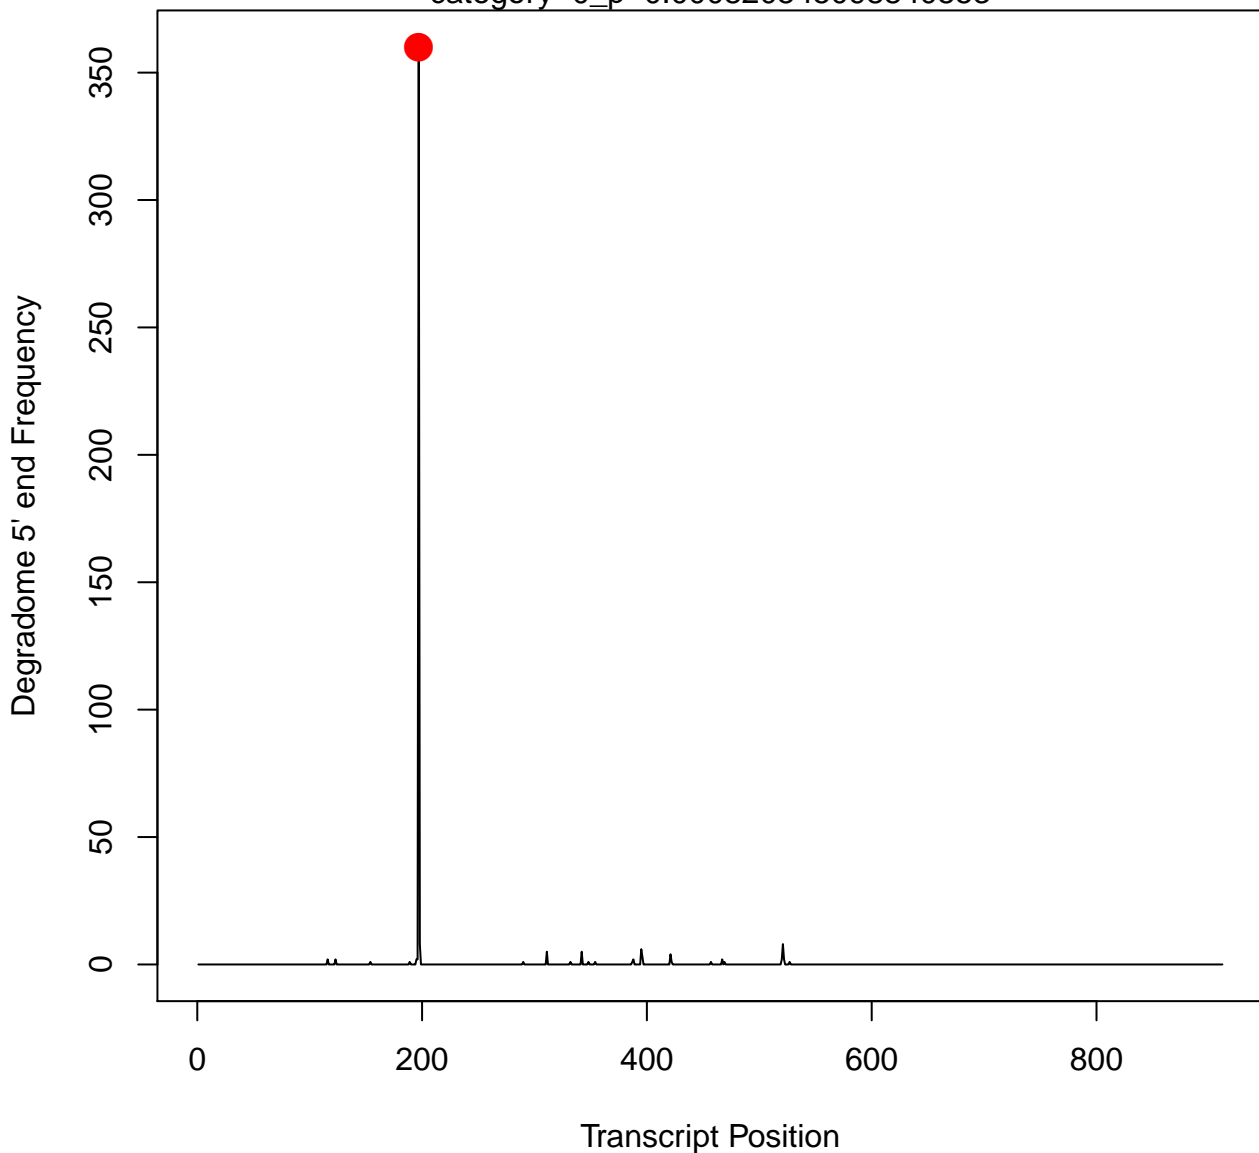

Supplement: s1 [file s1]

**T=Cluster-18410.46990\_Q=pma-miR946a-3p\_S=5111**

category=0\_p=0.0256596435673687

Degradsome 5' end Frequency

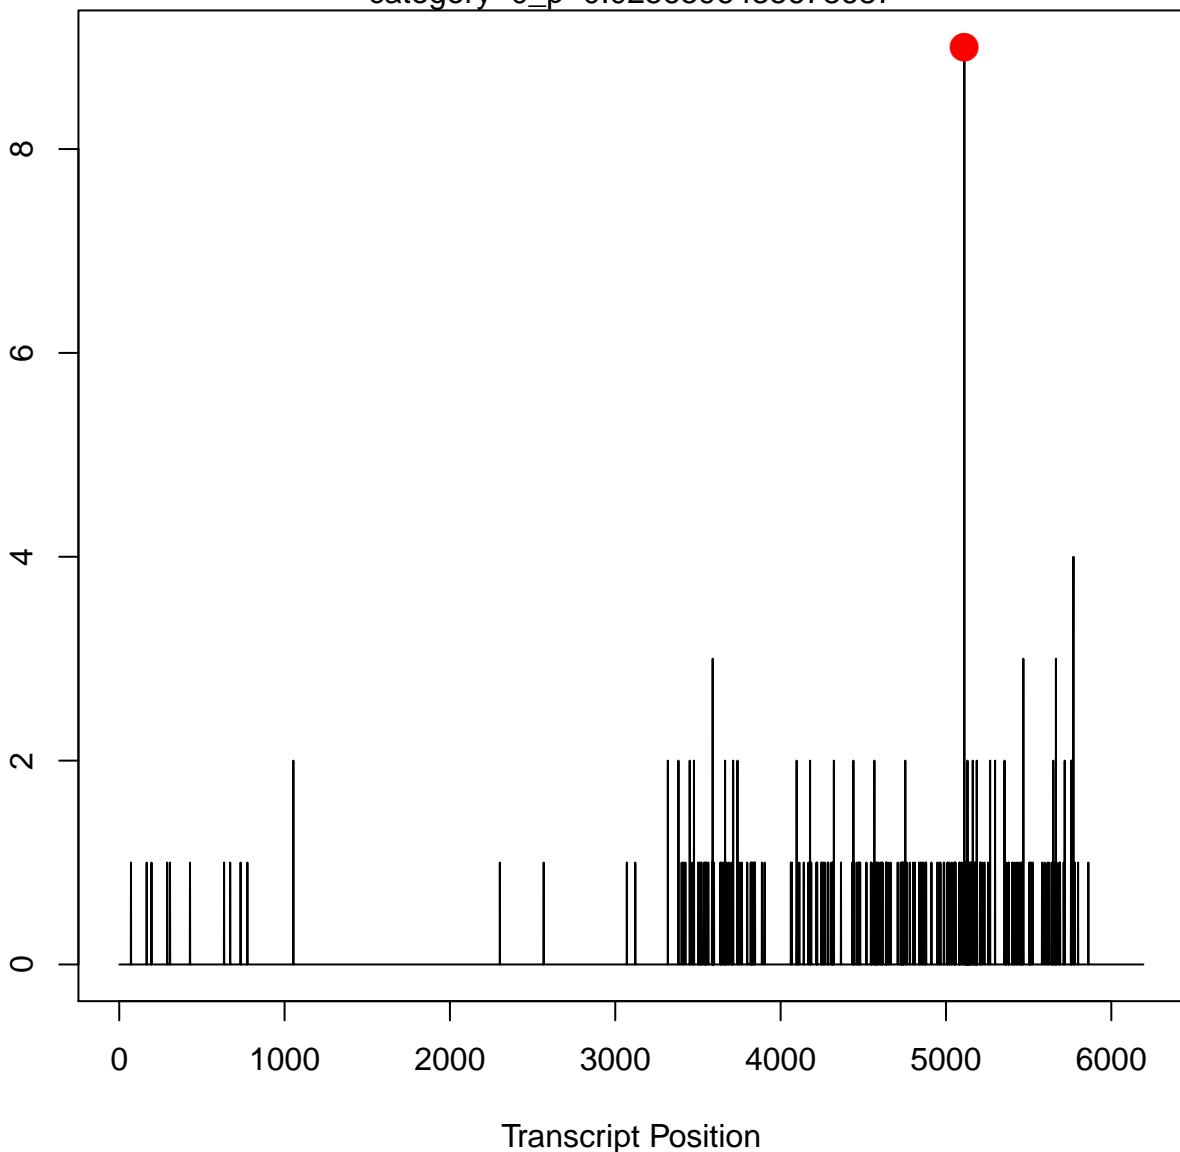

Supplement: s1 [file s1]

**T=Cluster-18410.73422\_Q=novel\_92\_S=1772**

category=0\_p=0.00491318222172366

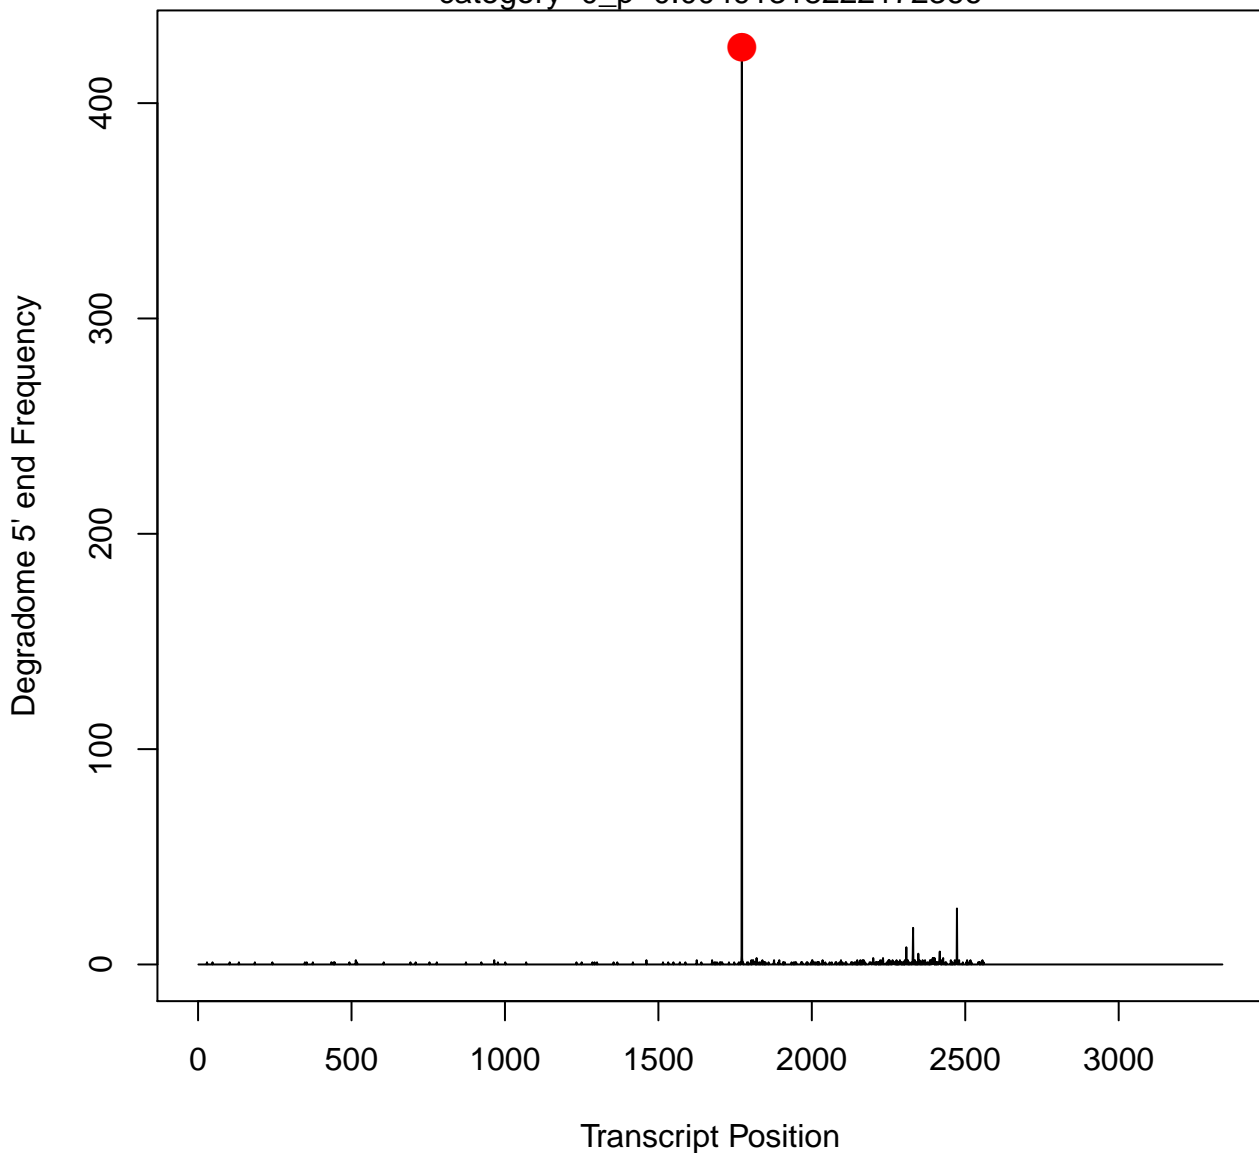

Supplement: s1 [file s1]

**T=Cluster-18410.32495\_Q=novel\_42\_S=208**

category=0\_p=0.00681733854218258

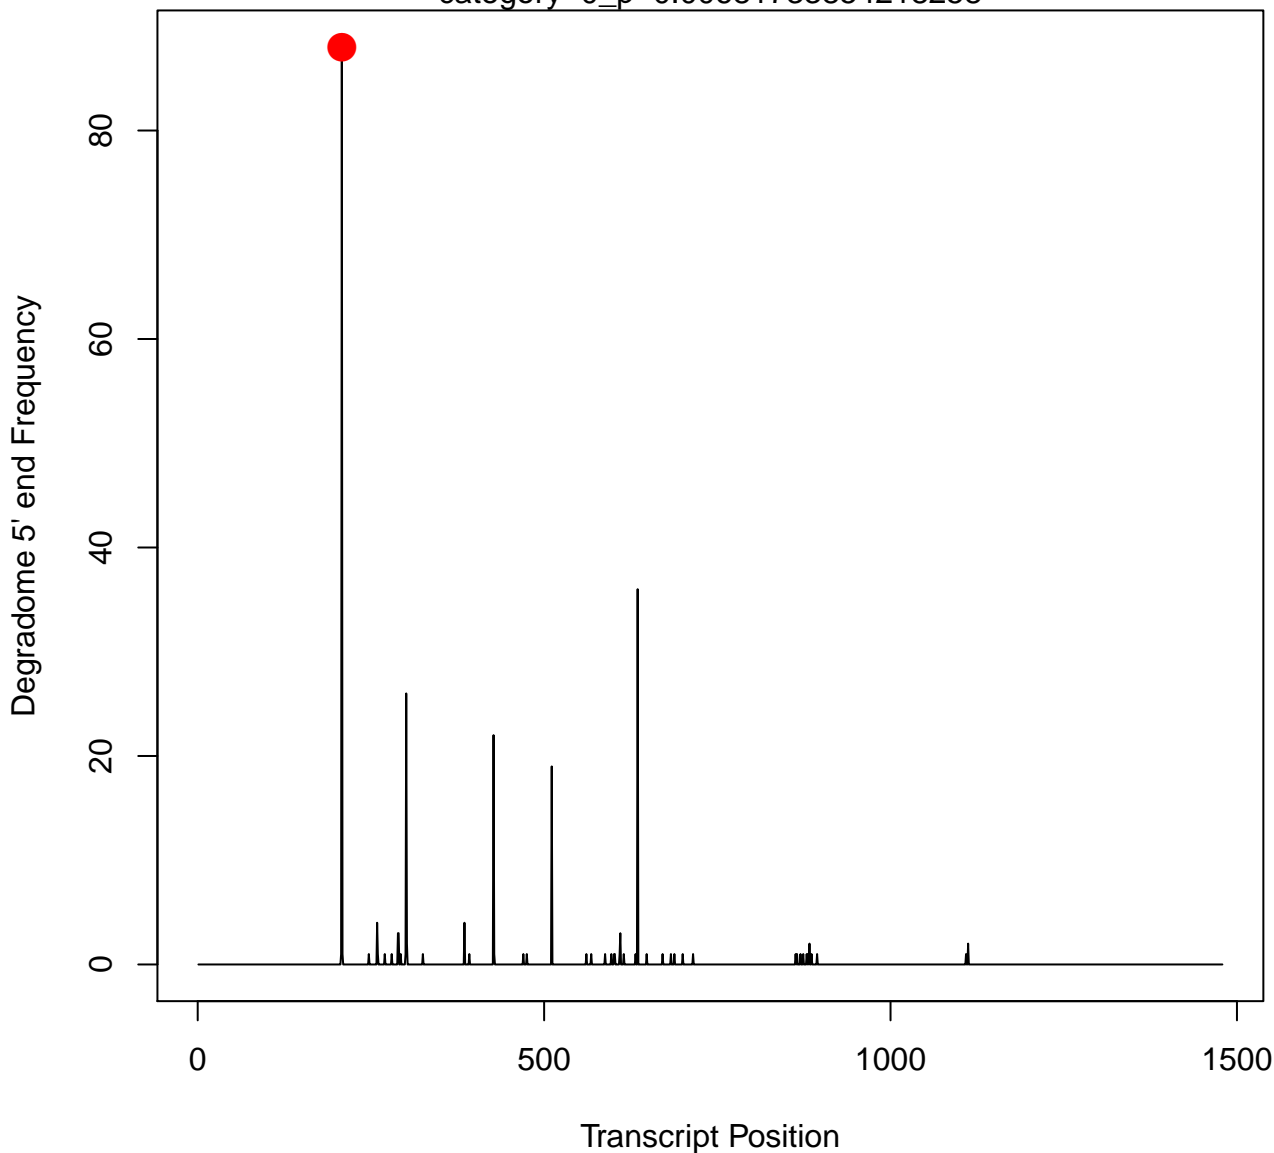

Supplement: s1 [file s1]

**T=Cluster-18410.83488\_Q=novel\_3\_S=228**

category=0\_p=0.00027358987754178

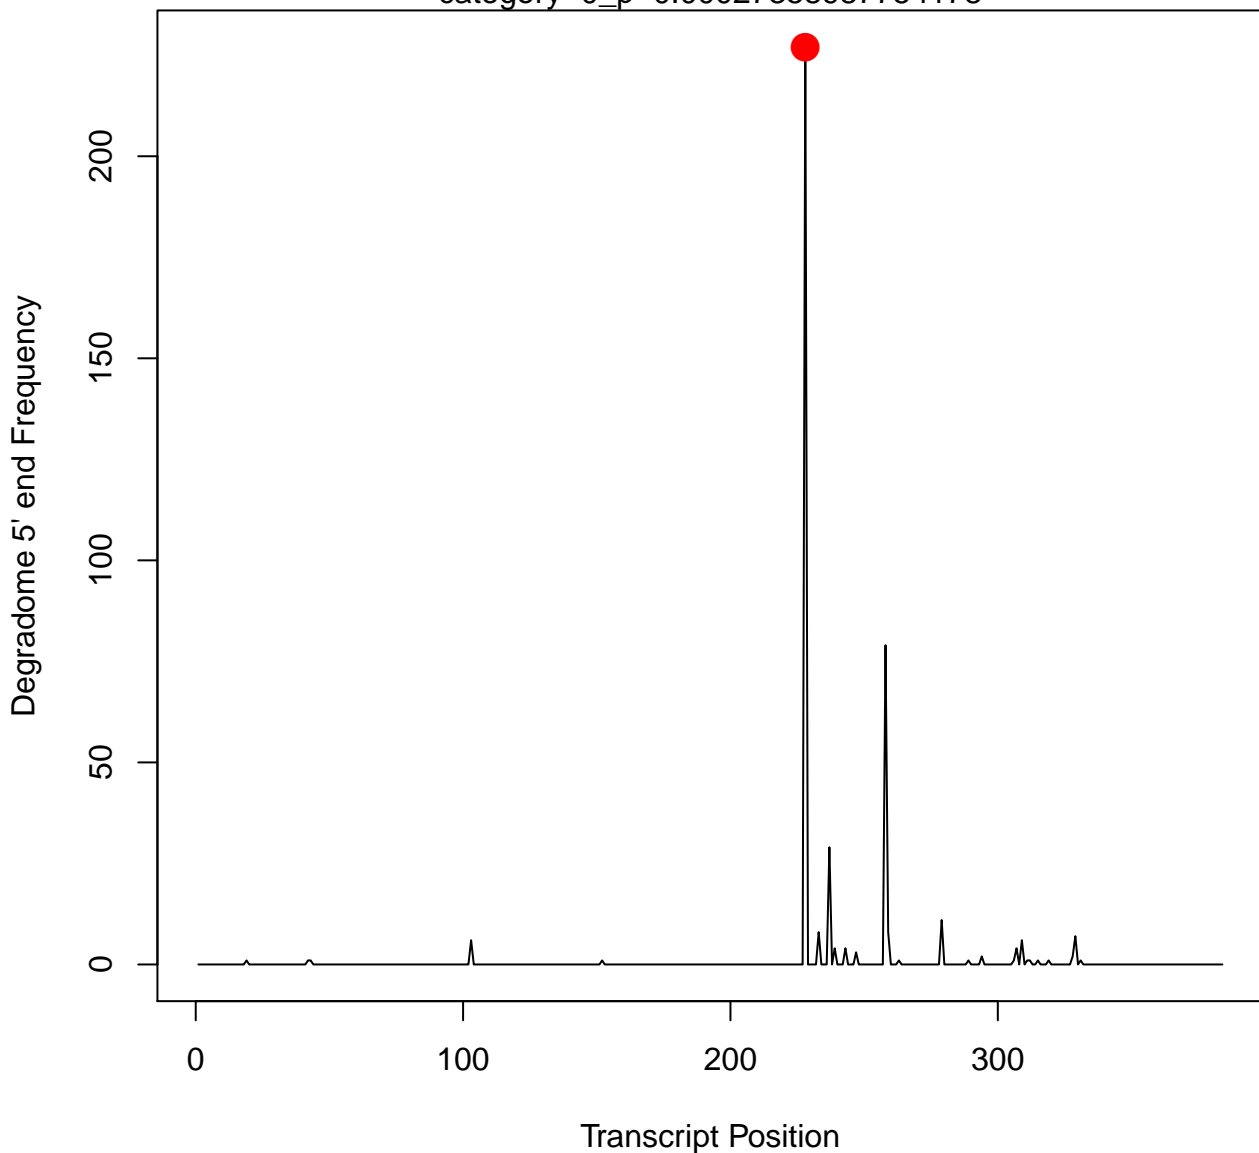

Supplement: s1 [file s1]

**T=Cluster-18410.65062\_Q=novel\_145\_S=1643**

category=0\_p=0.0444059915385397

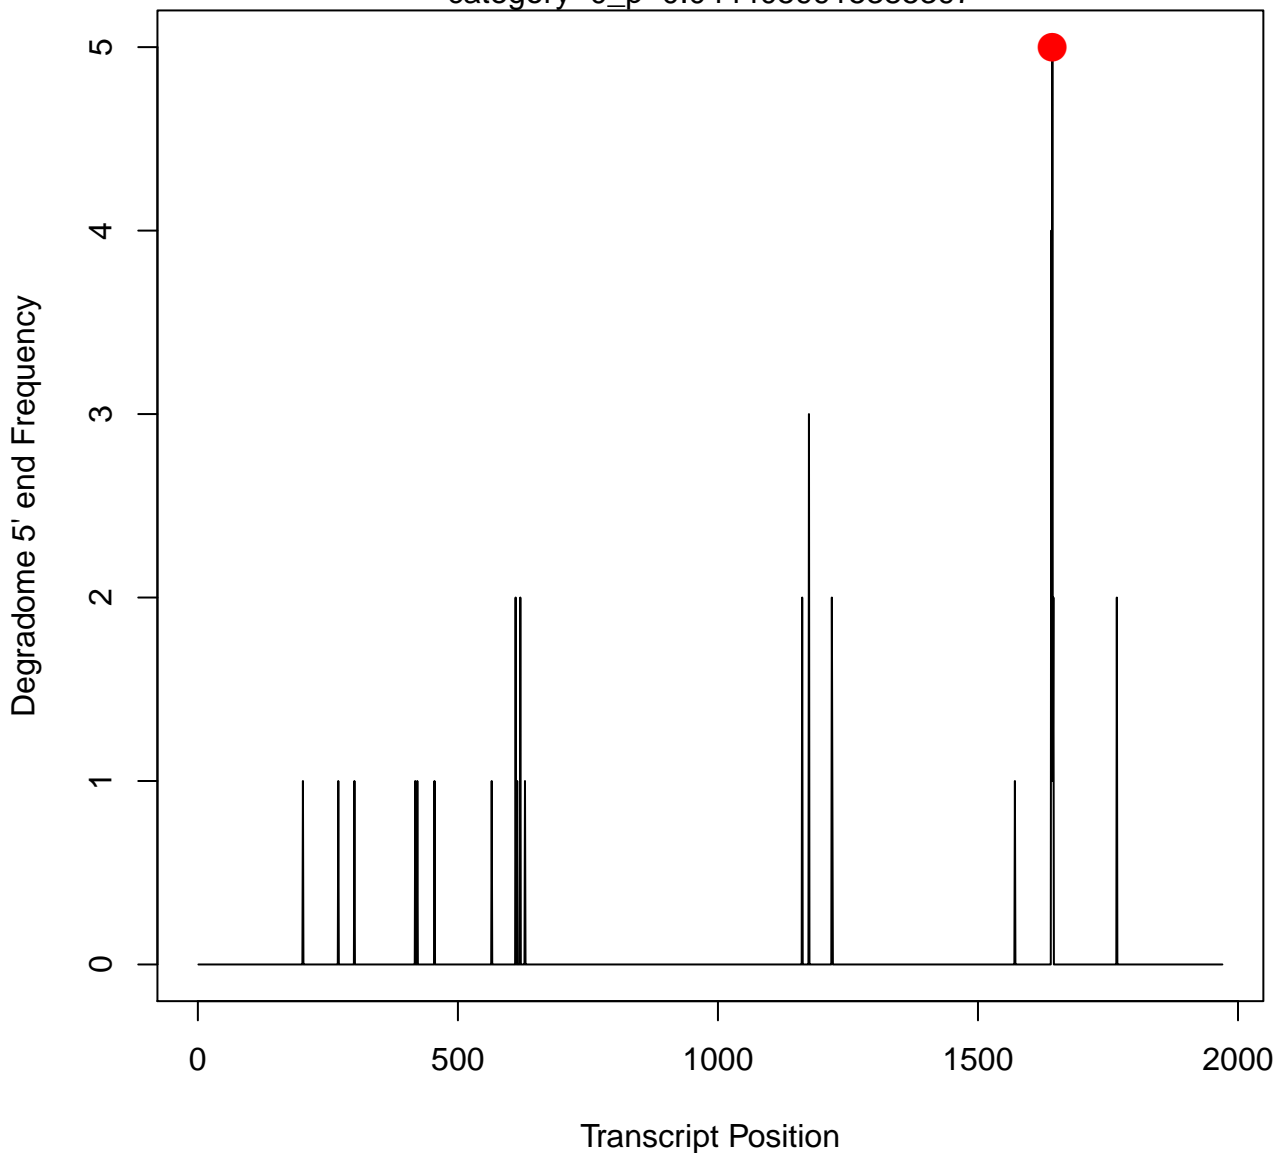

Supplement: s1 [file s1]

**T=Cluster-18410.39680\_Q=novel\_46\_S=482**

category=2\_p=0.0115490438418195

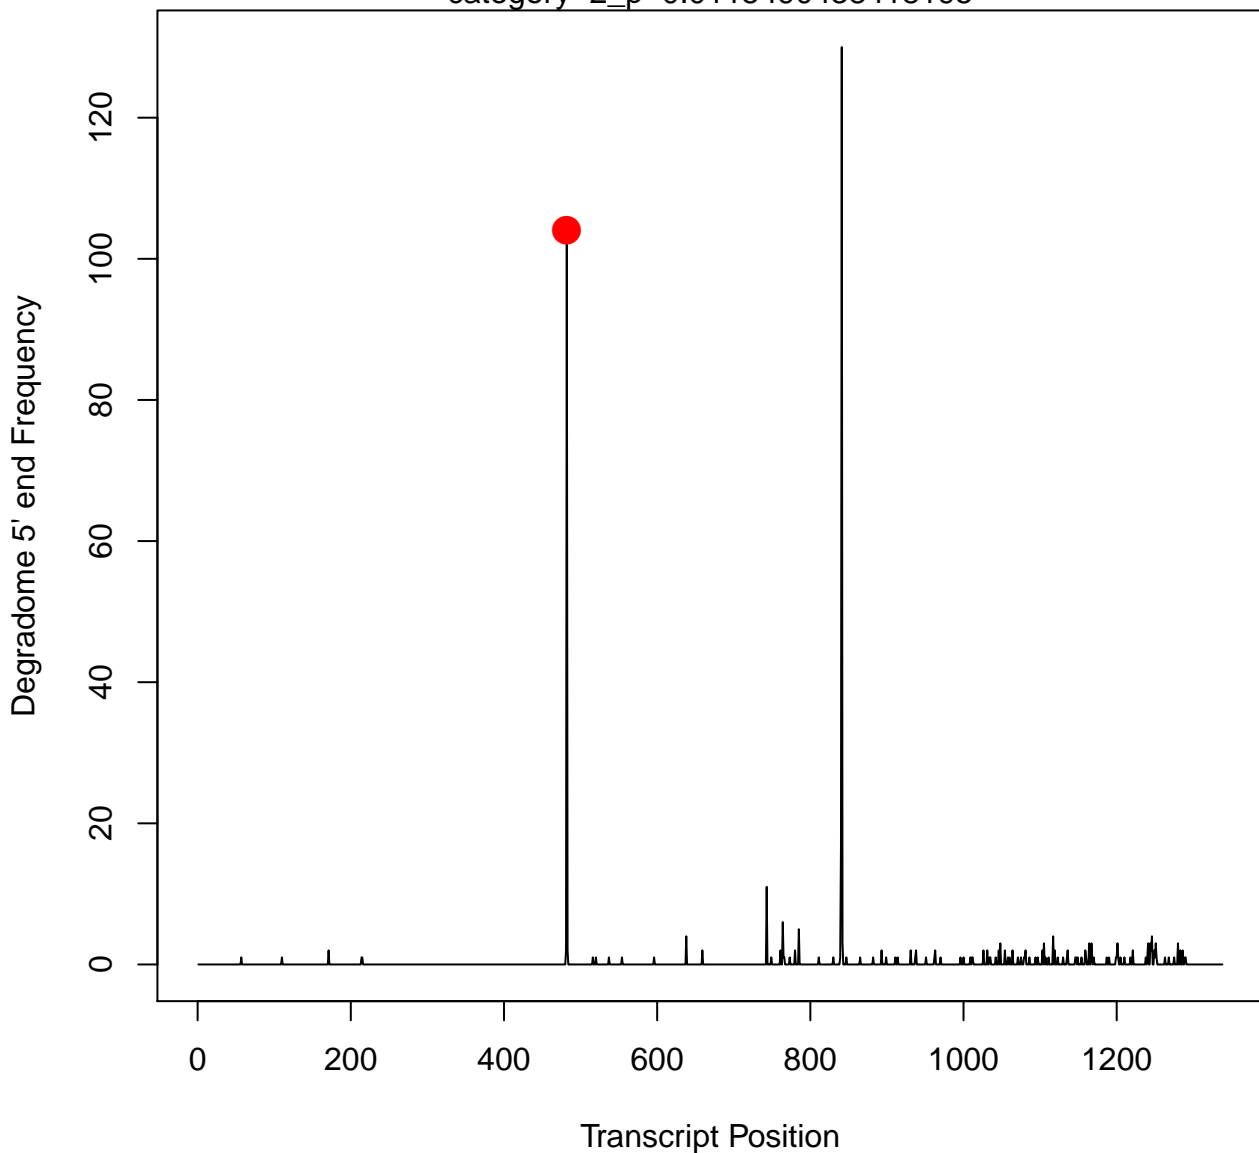

Supplement: s1 [file s1]

**T=Cluster-18410.34603\_Q=novel\_148\_S=437**

category=0\_p=0.0130482348291631

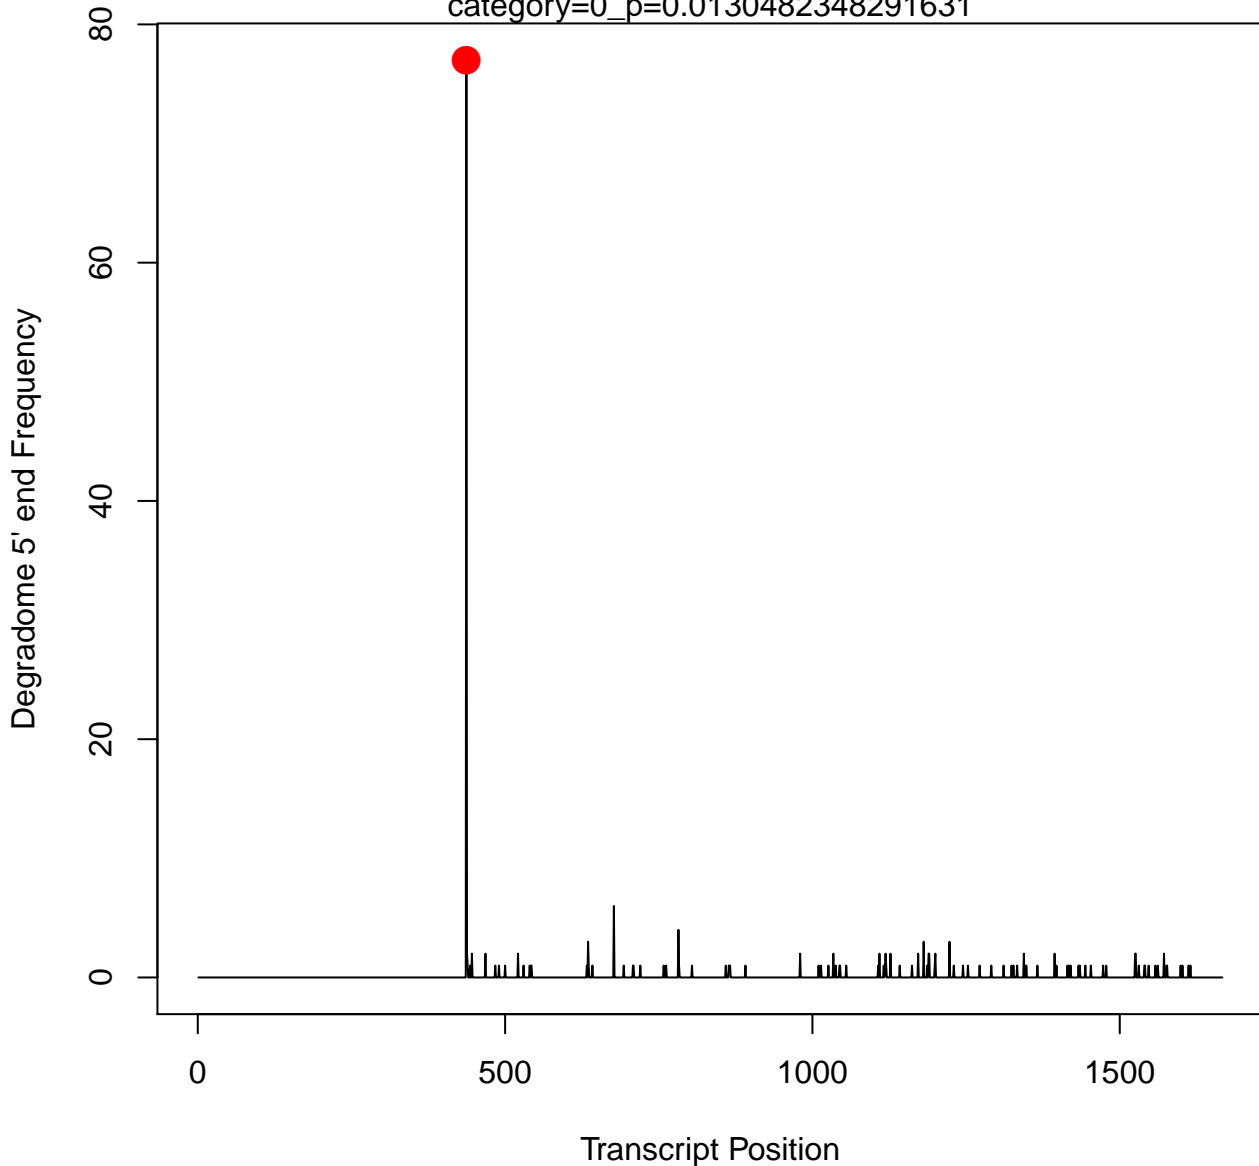

Supplement: s1 [file s1]

**T=Cluster-18410.35925\_Q=pma-miR951\_S=430**

category=0\_p=0.00164041690342198

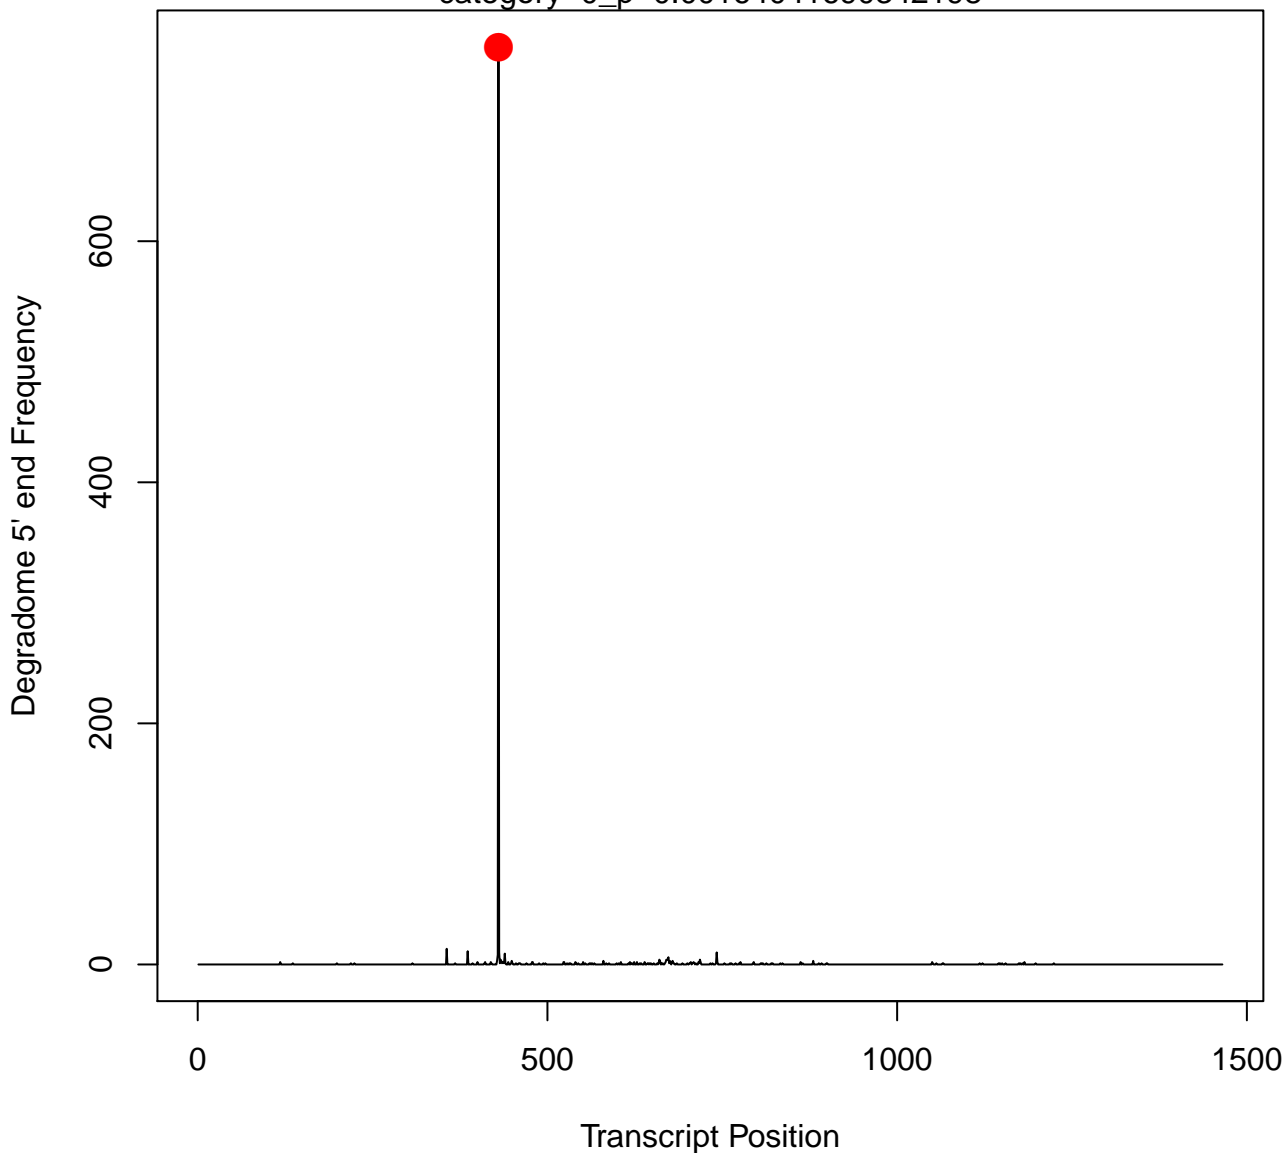

Supplement: s1 [file s1]

**T=Cluster-18410.57382\_Q=novel\_156\_S=660**

category=2\_p=0.0564267304887326

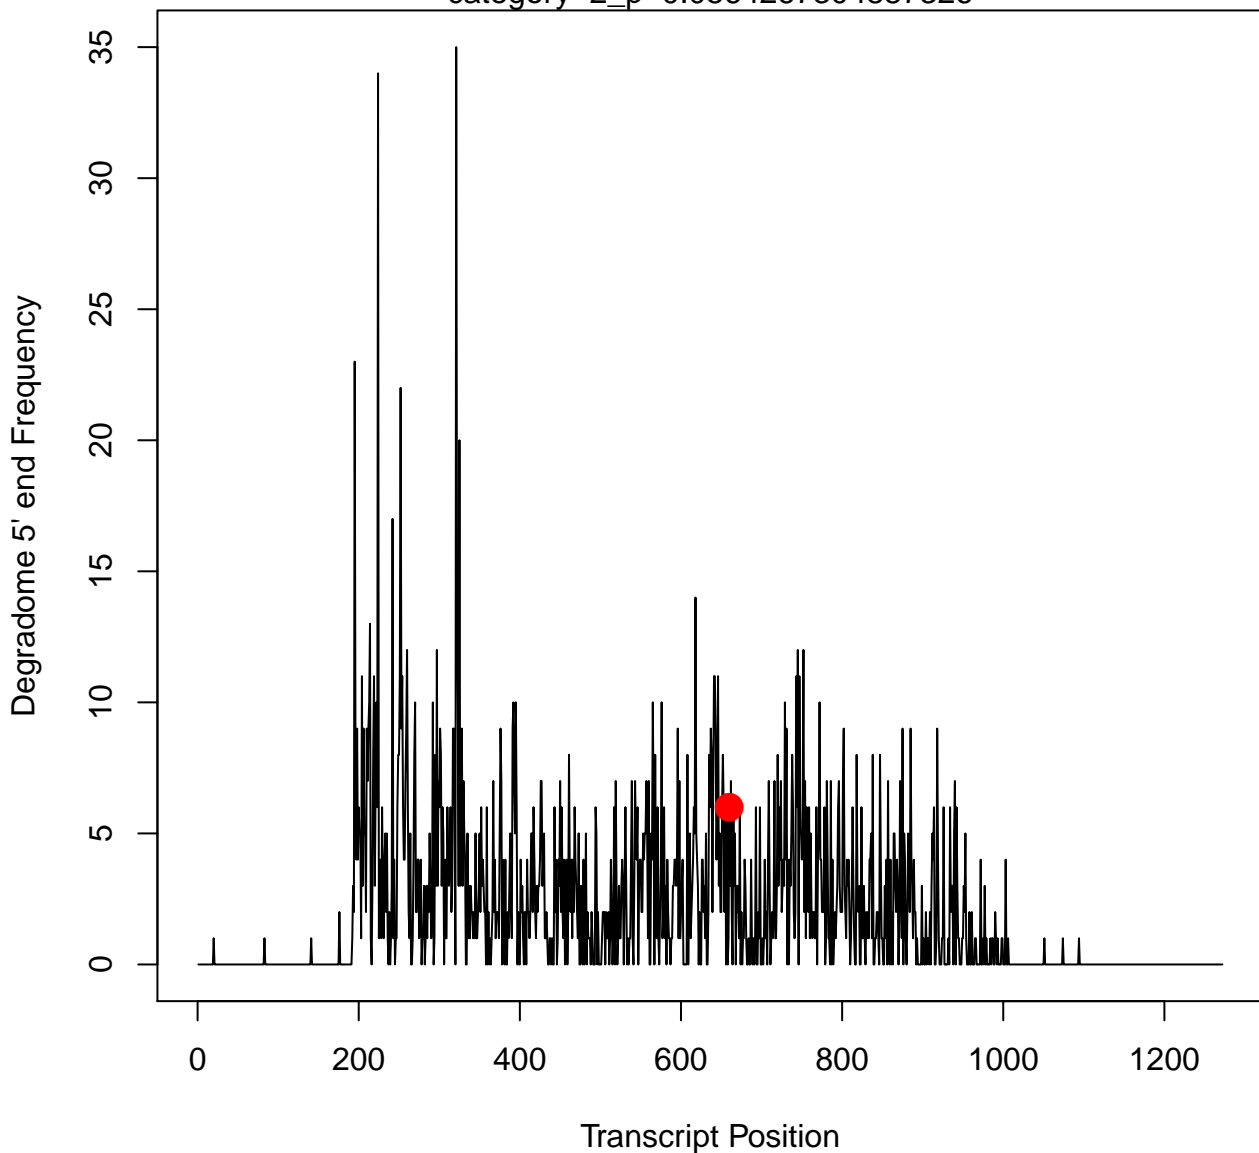

Supplement: s1 [file s1]

**T=Cluster-18410.68246\_Q=novel\_27\_S=121**

category=1\_p=0.024343371496319

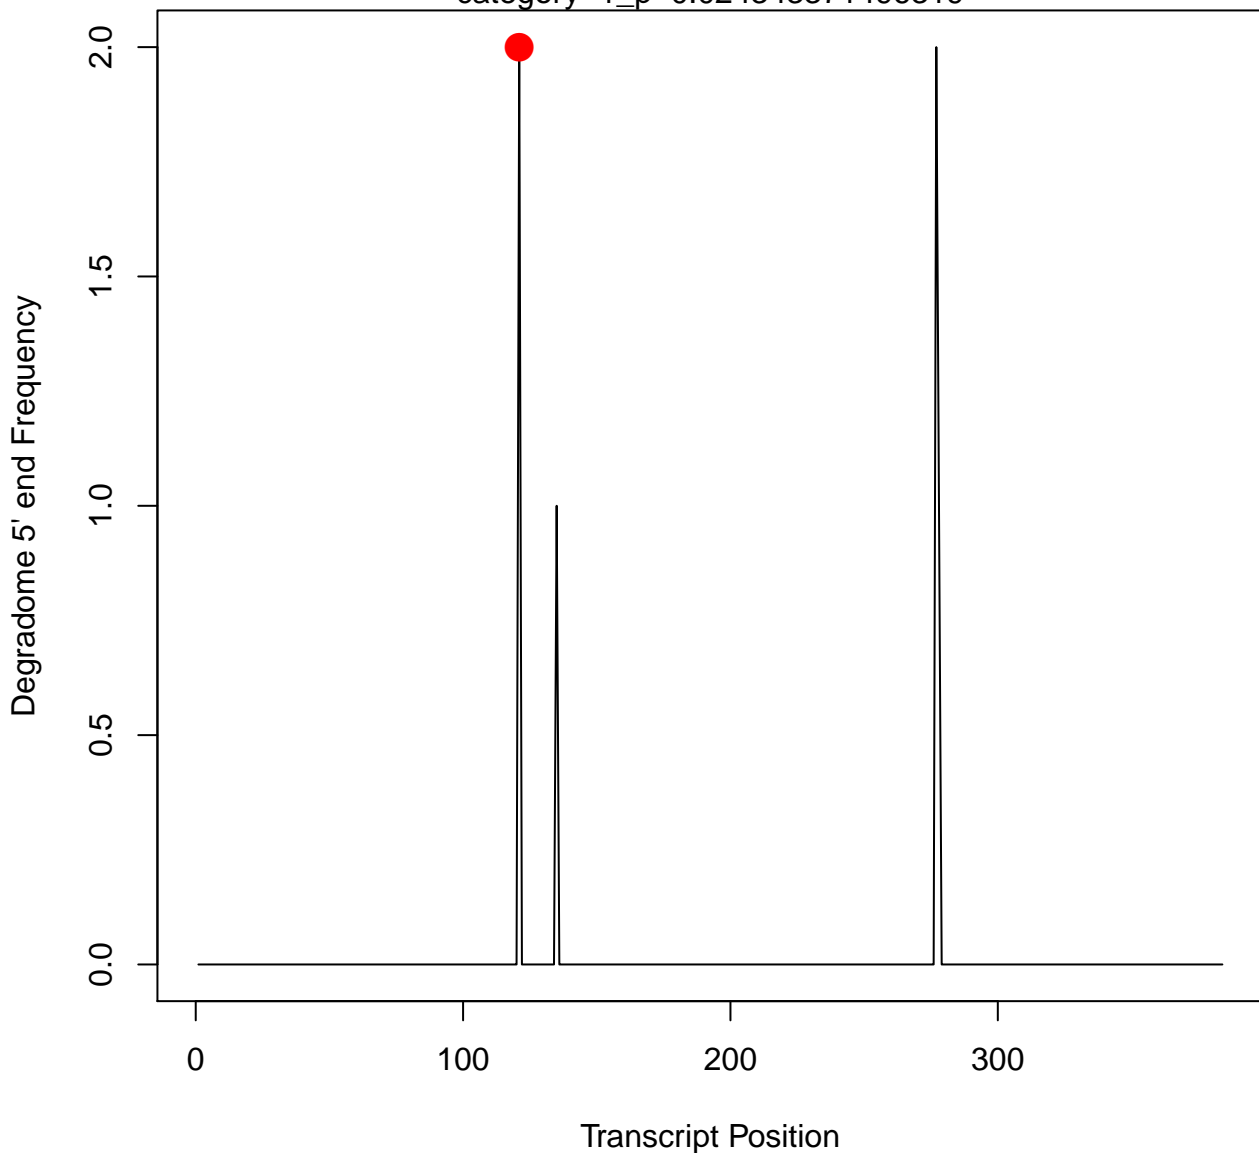

Supplement: s1 [file s1]

**T=Cluster-18410.20555\_Q=novel\_6\_S=111**

category=0\_p=0.0122377313407951

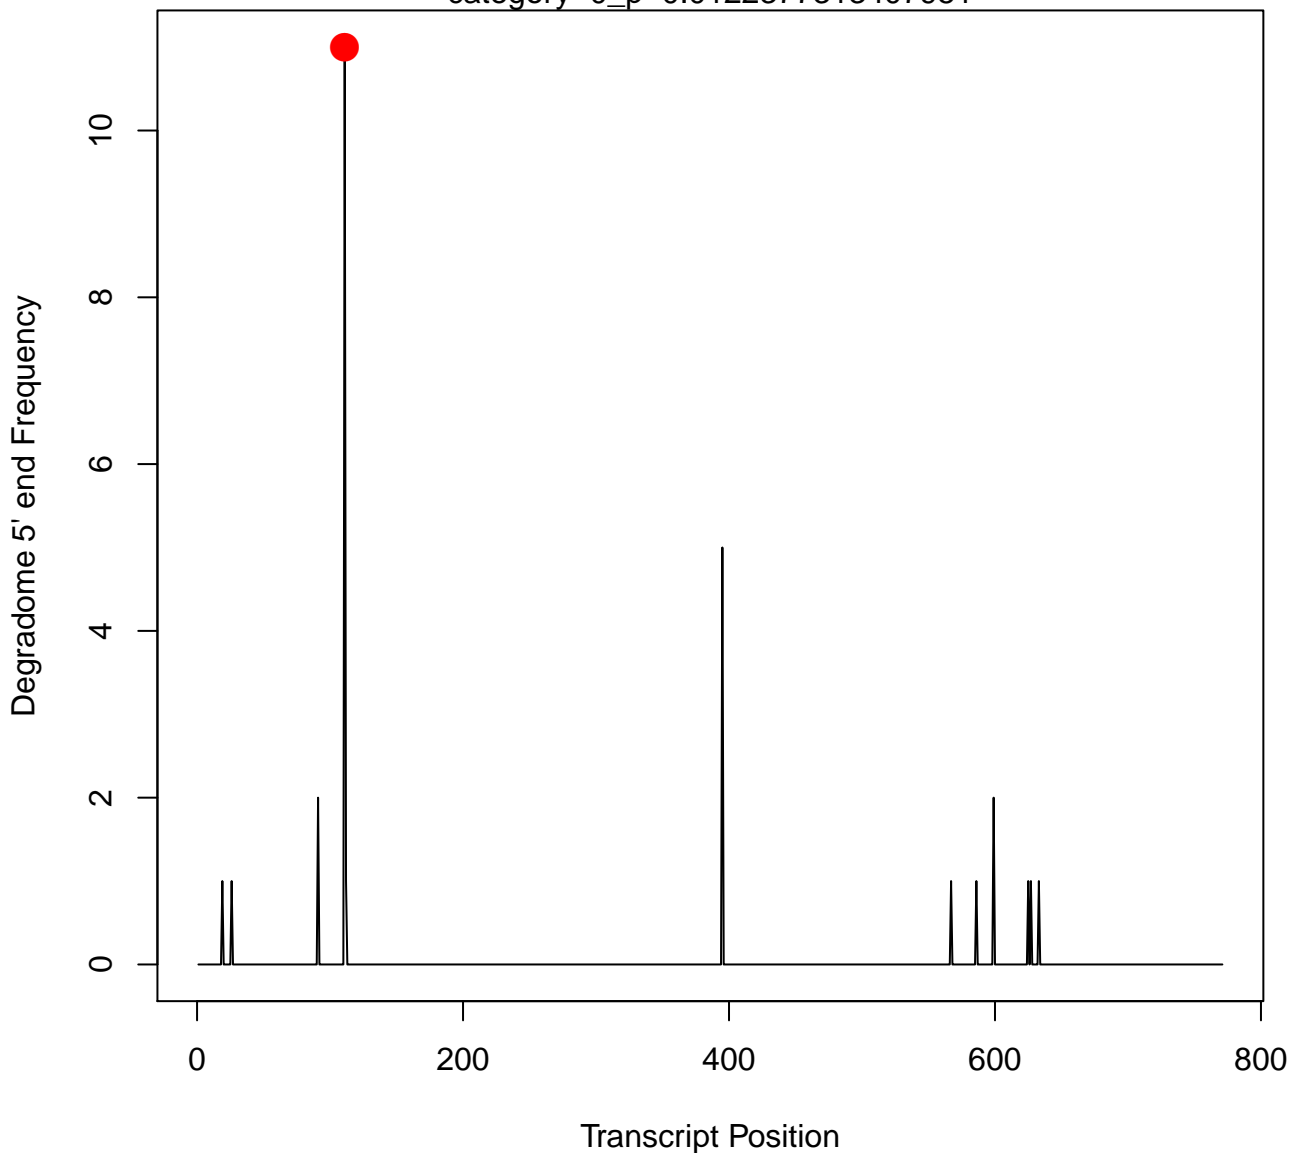

Supplement: s1 [file s1]

**T=Cluster-18410.82794\_Q=novel\_54\_S=42**

category=2\_p=0.0780956144108357

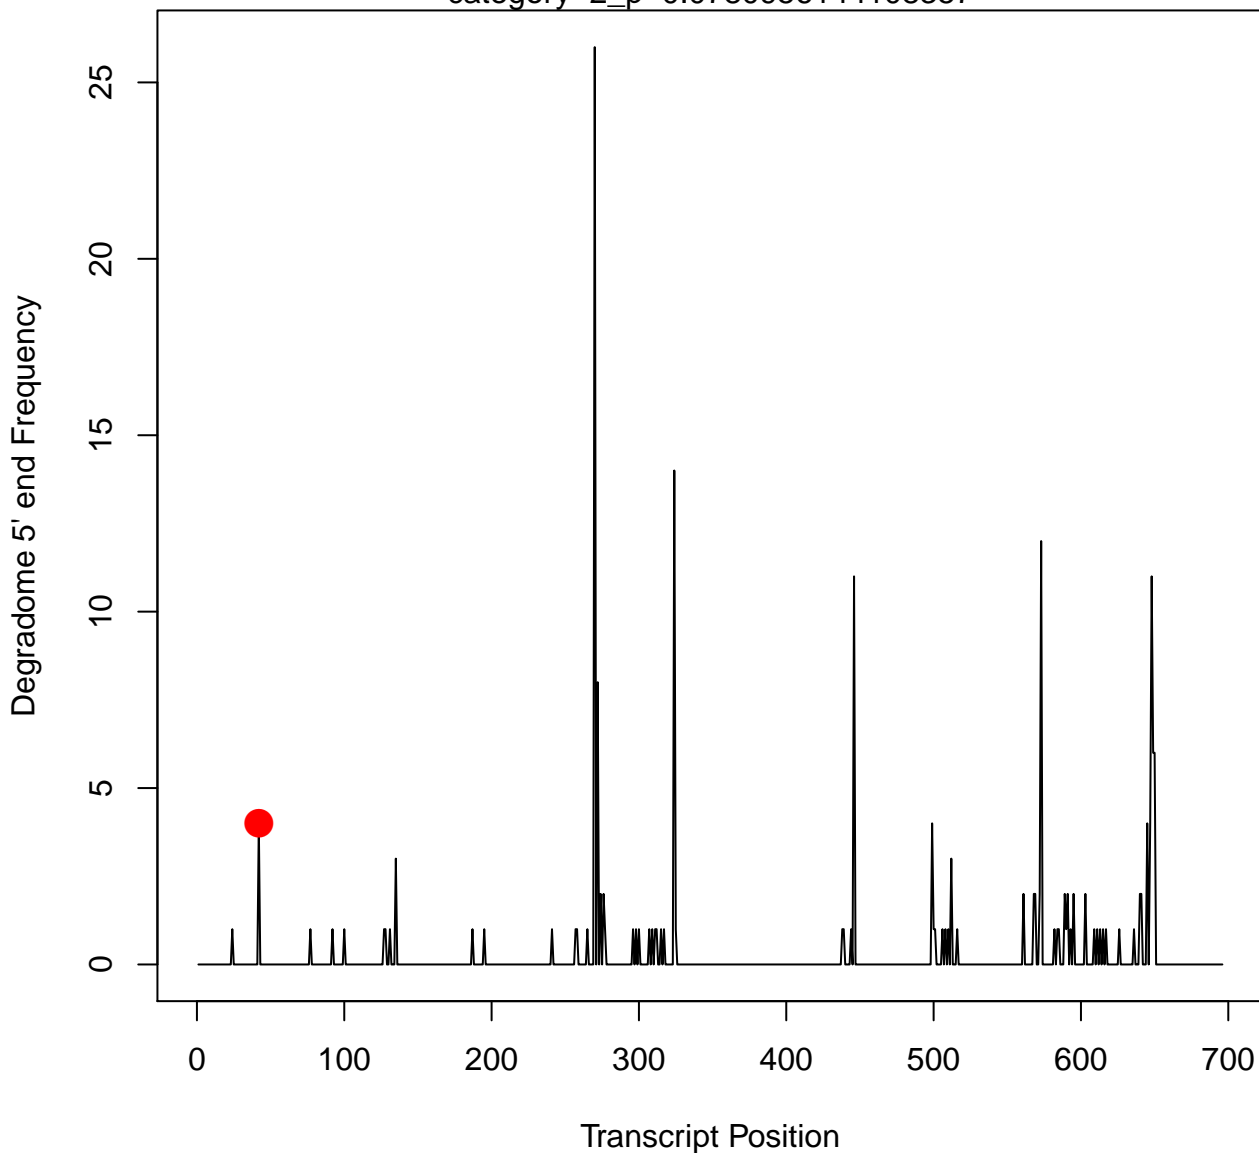

Supplement: s1 [file s1]

**T=Cluster-18410.41733\_Q=novel\_82\_S=256**

category=2\_p=0.0454020367599618

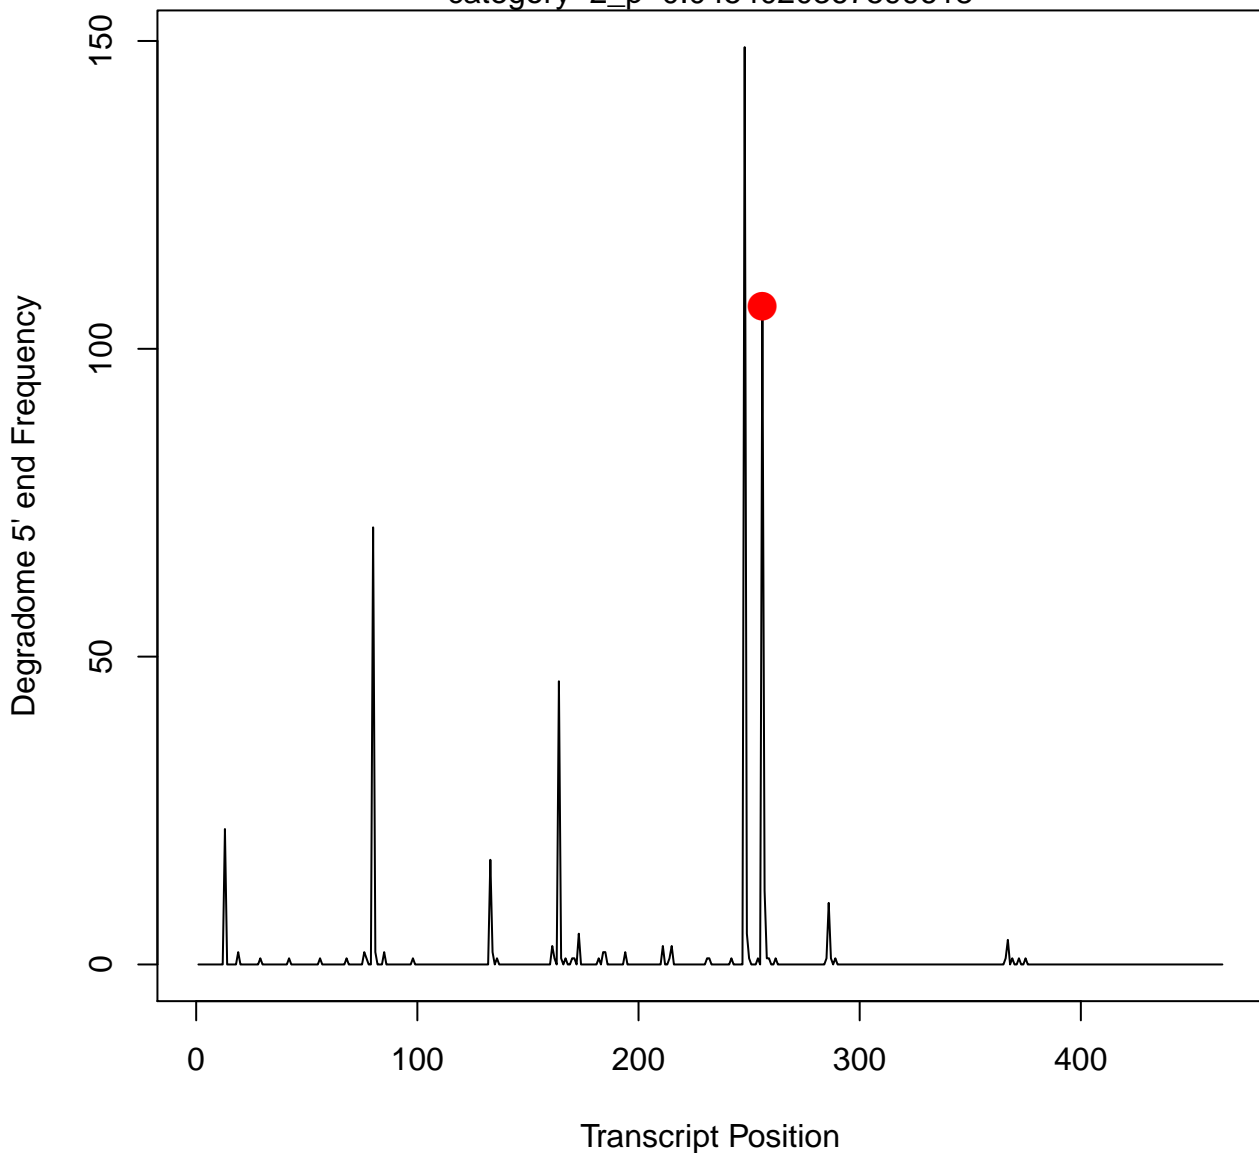

Supplement: s1 [file s1]

**T=Cluster-18410.86049\_Q=novel\_11\_S=364**

category=0\_p=0.0192400405540085

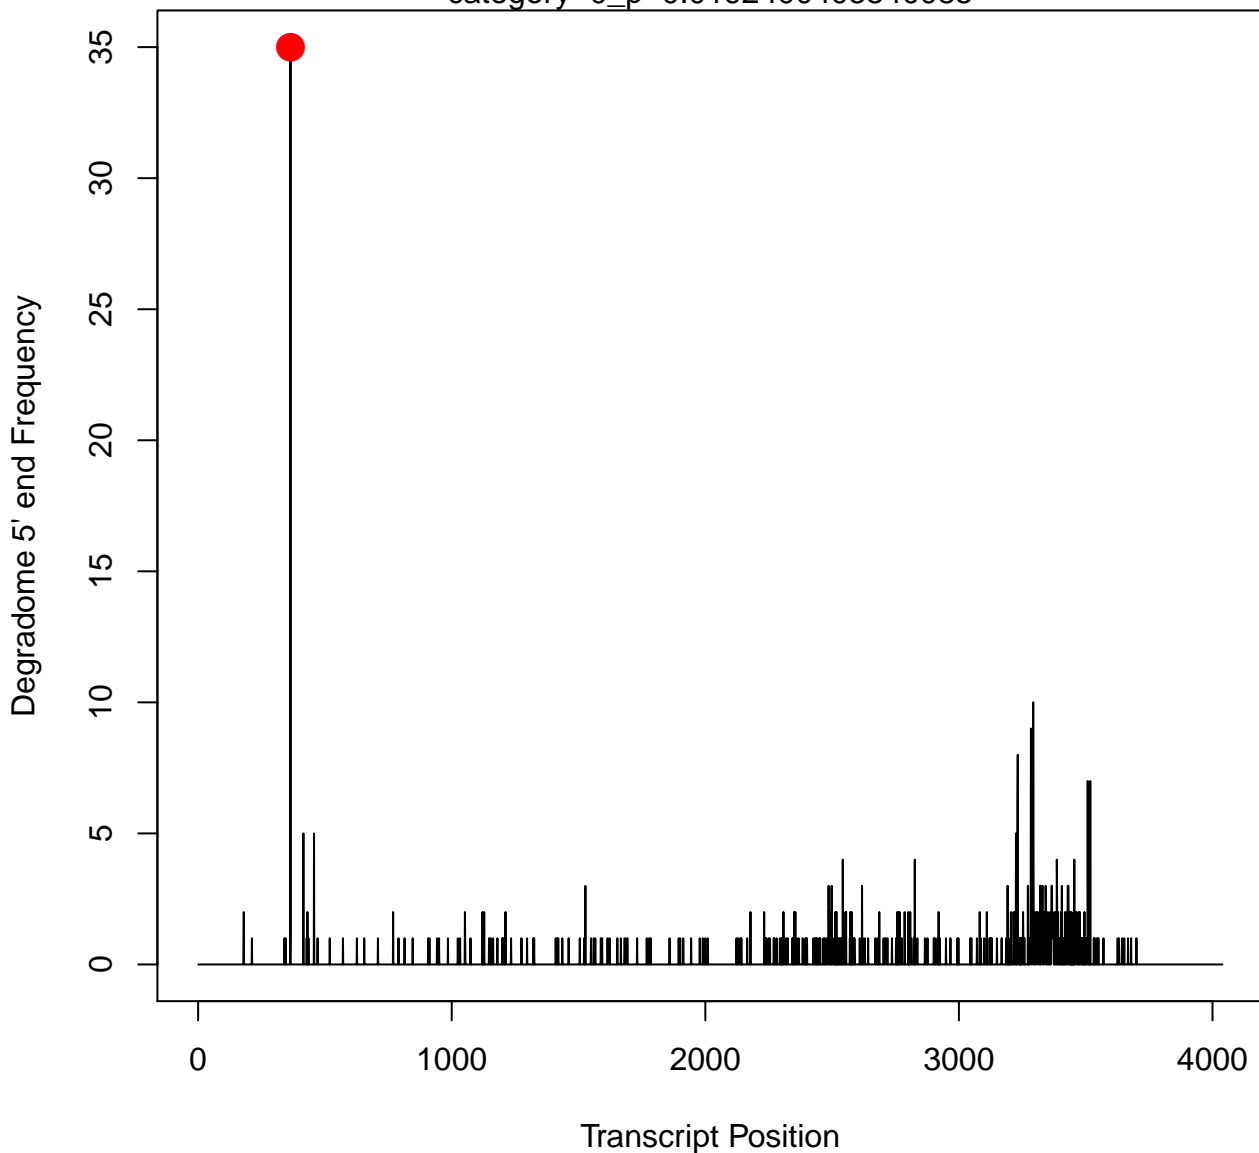

Supplement: s1 [file s1]

**T=Cluster-18410.26264\_Q=novel\_114\_S=1399**

category=2\_p=0.0992668787568005

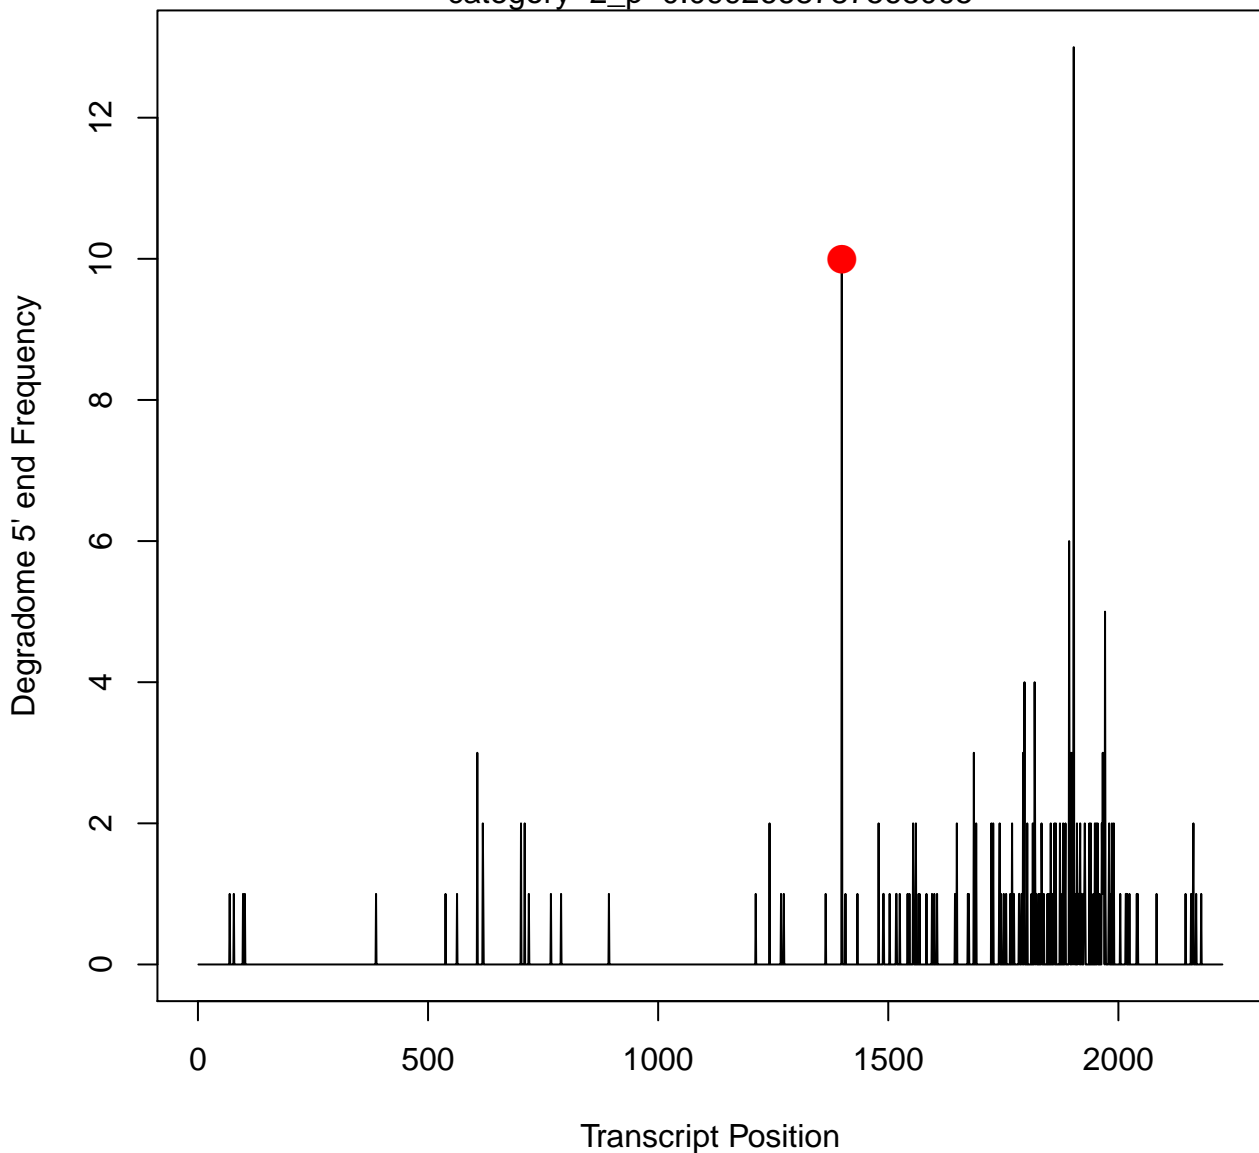

Supplement: s1 [file s1]

**T=Cluster-18410.27112\_Q=novel\_16\_S=860**

category=0\_p=0.00109391048354923

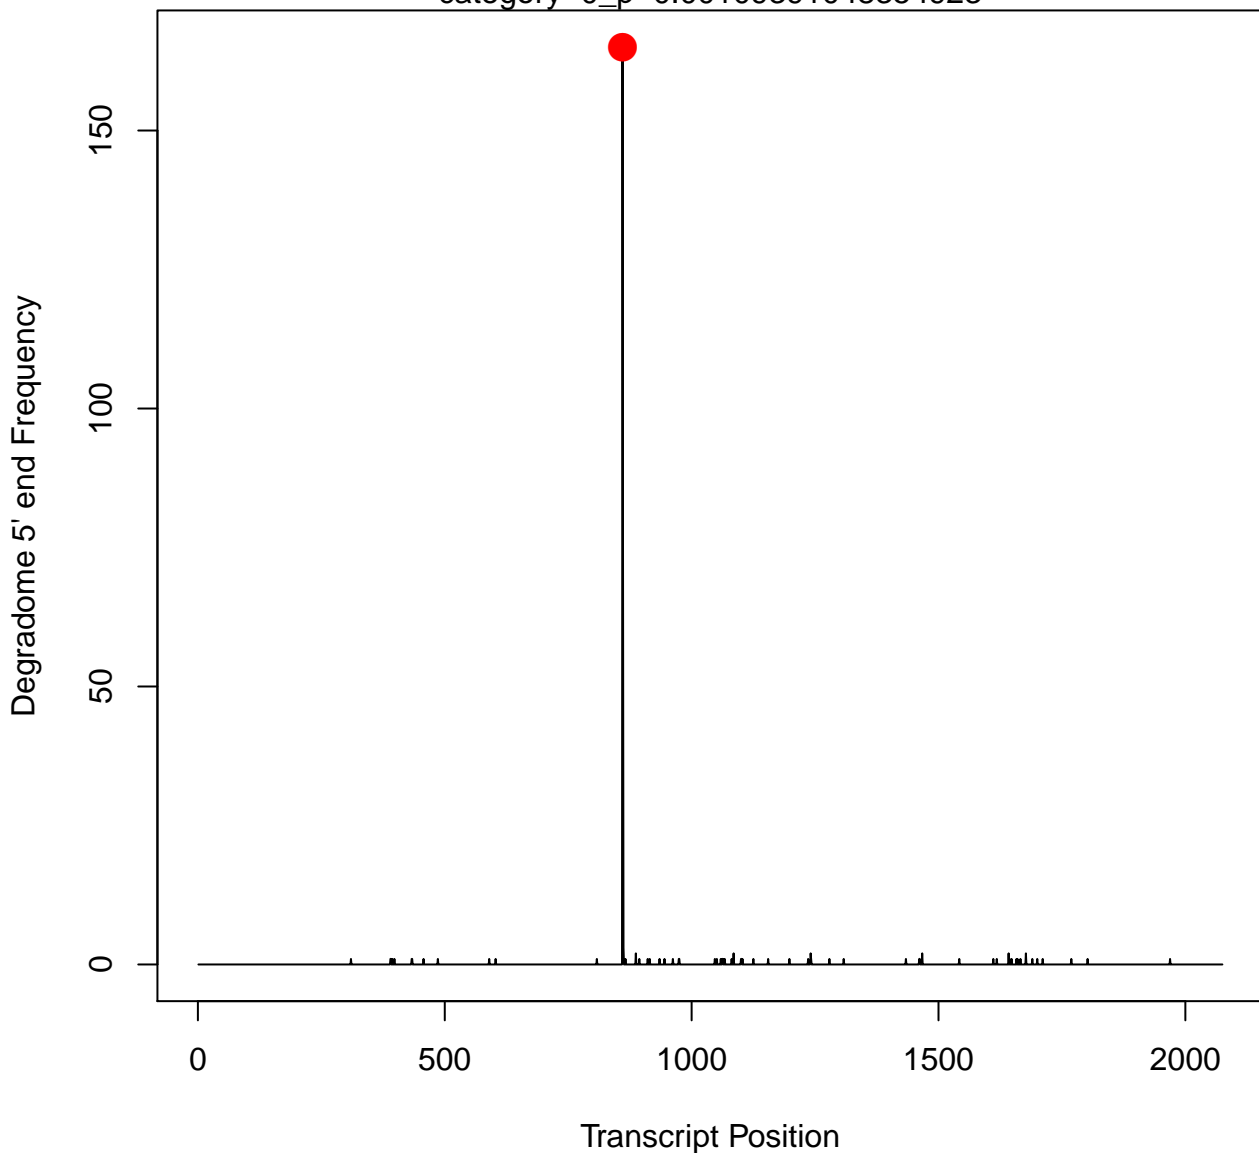

Supplement: s1 [file s1]

**T=Cluster-18410.23858\_Q=novel\_38\_S=45**

category=0\_p=0.0040959980740275

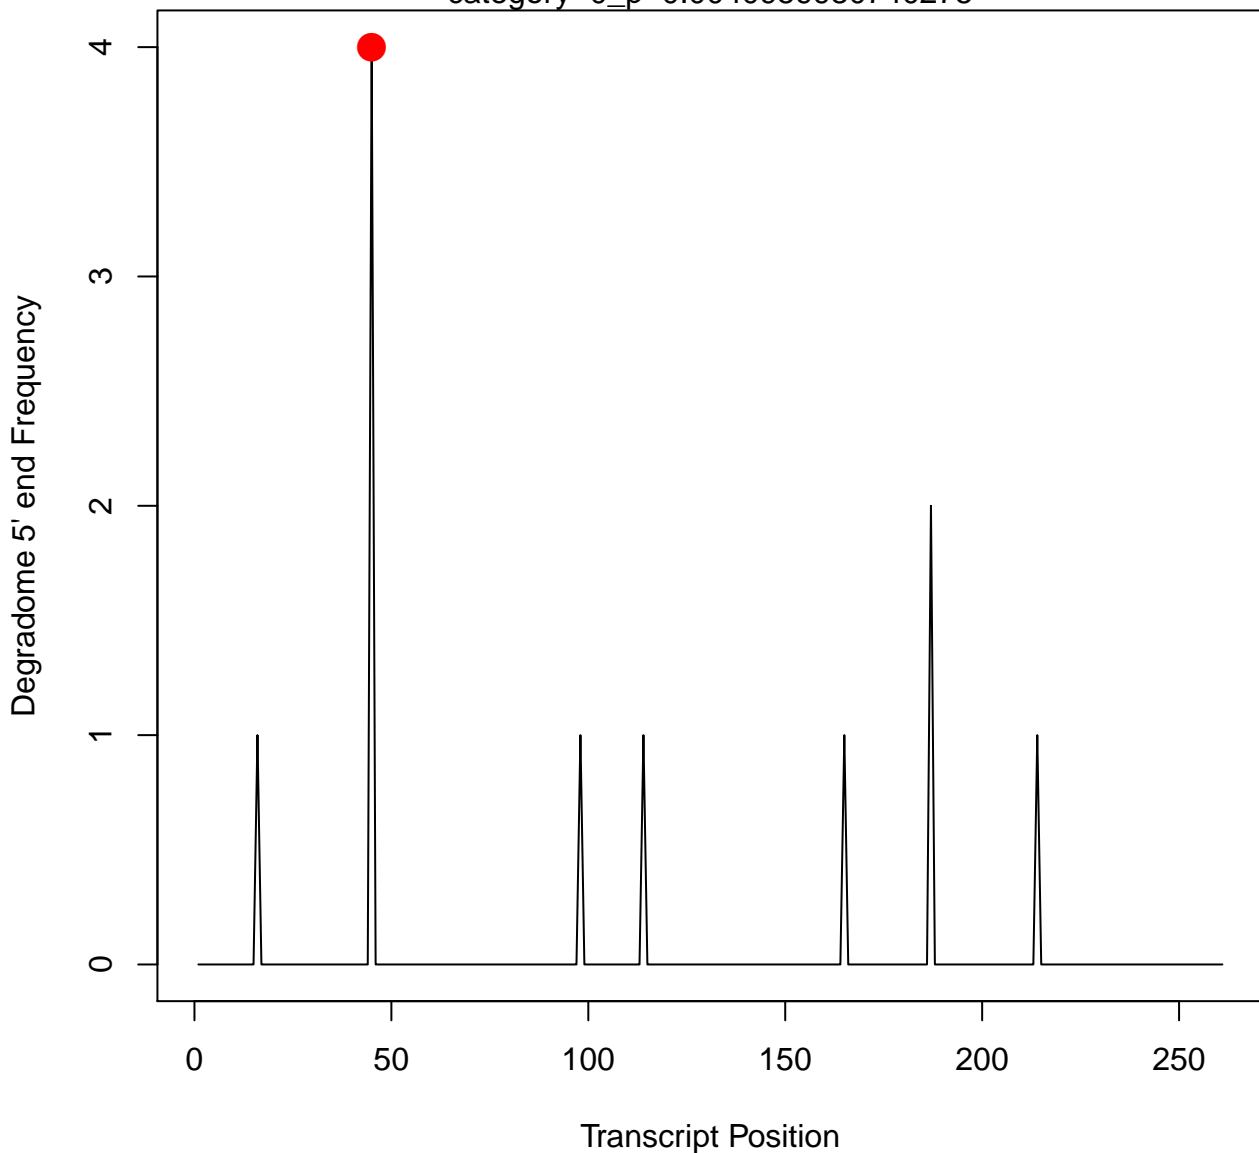

Supplement: s1 [file s1]

**T=Cluster-18410.43310\_Q=pma-miR946a-5p\_S=364**

category=3\_p=0.0881450085293495

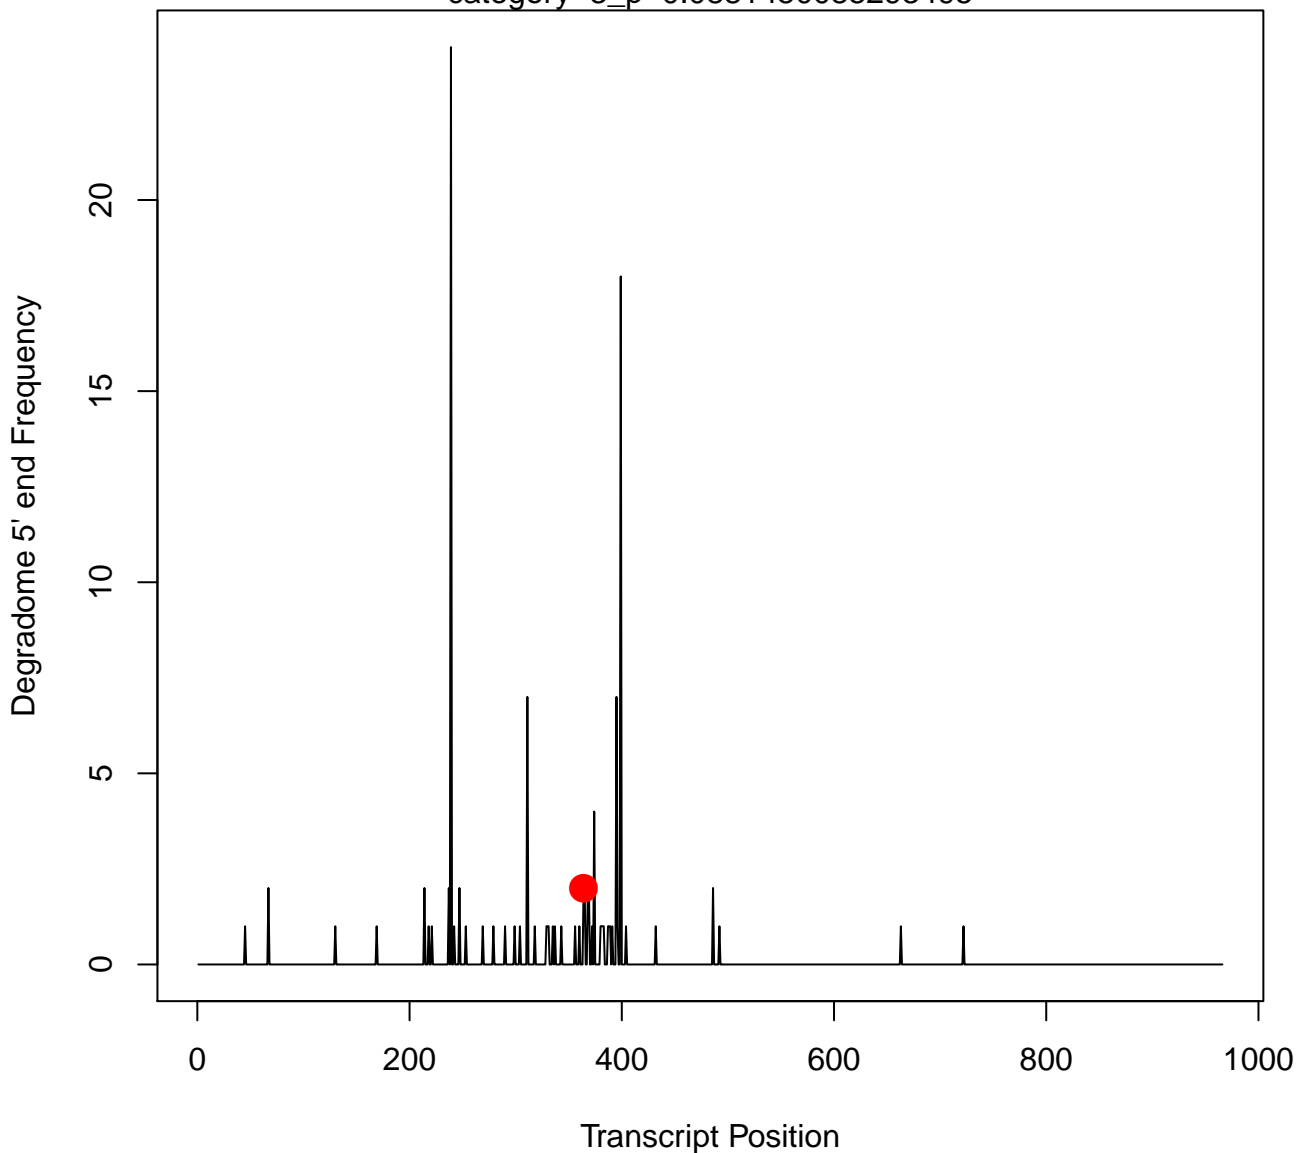

Supplement: s1 [file s1]

**T=Cluster-18410.81391\_Q=pma-miR482a\_S=128**

category=0\_p=0.0293849893488598

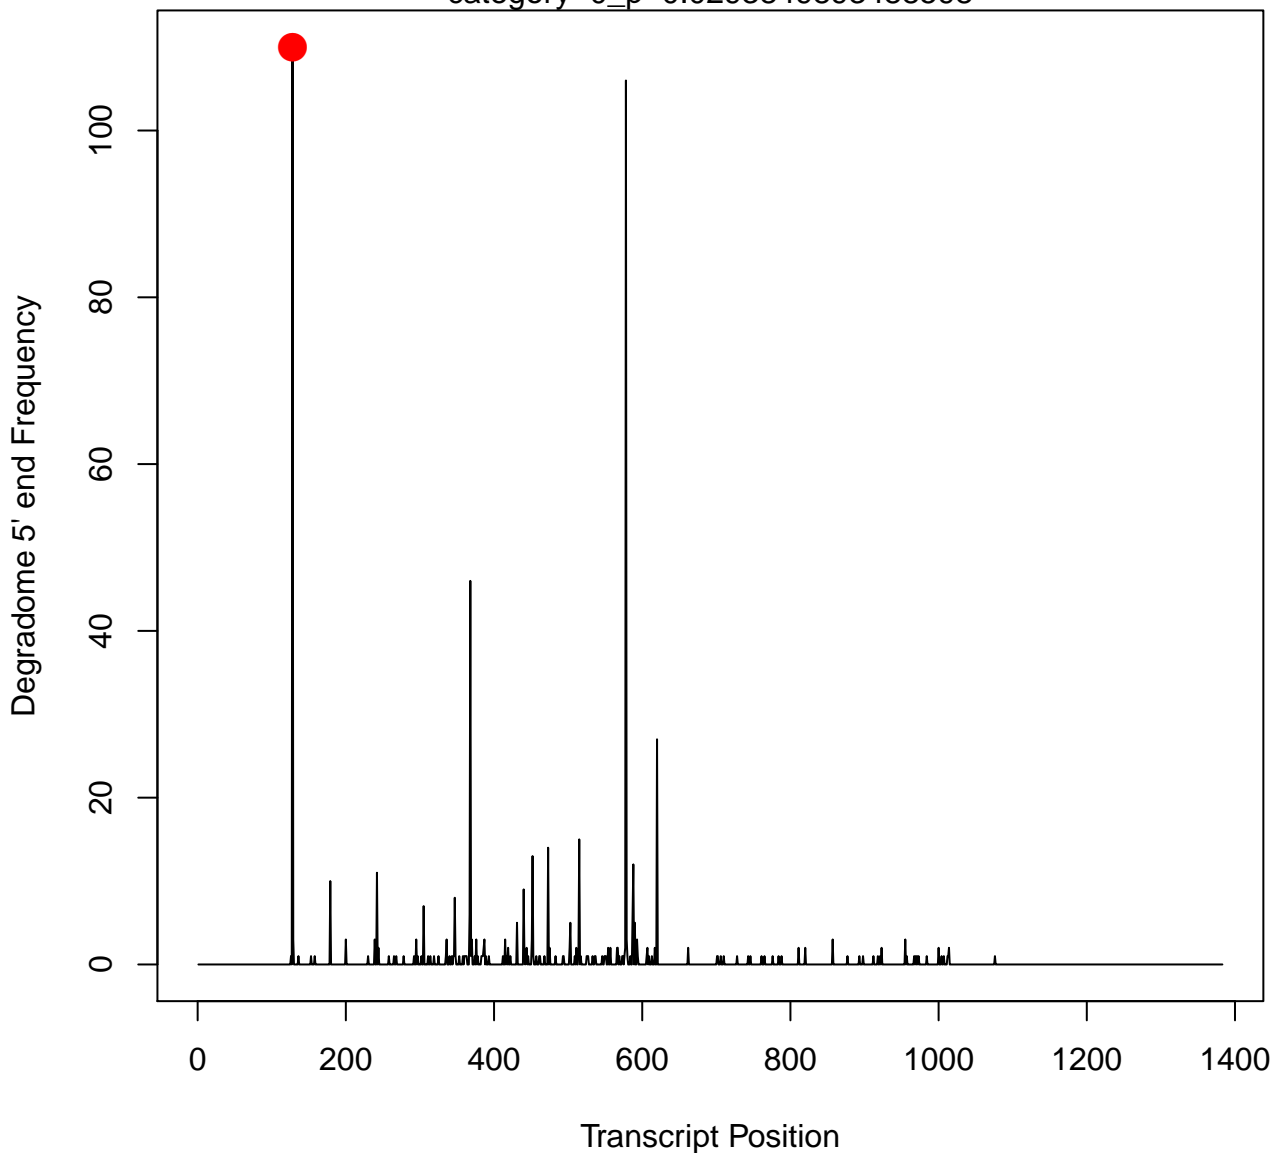

Supplement: s1 [file s1]

**T=Cluster-18410.74100\_Q=novel\_57\_S=730**

category=0\_p=0.0133182548417358

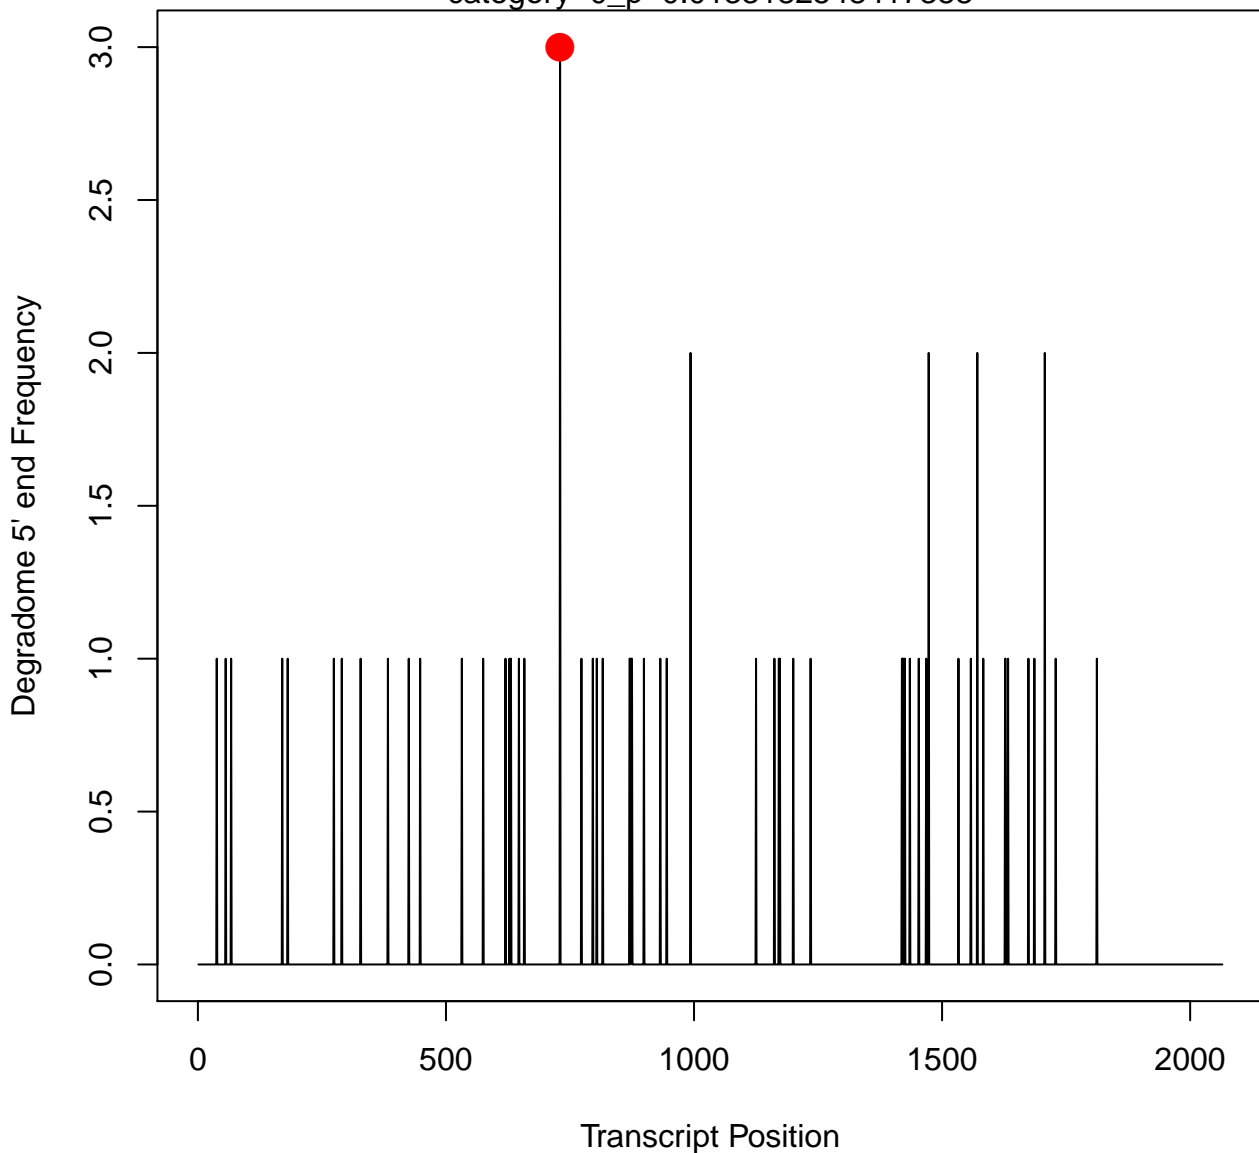

Supplement: s1 [file s1]

**T=Cluster-21783.0\_Q=novel\_65\_S=464**

category=3\_p=0.0579593960730893

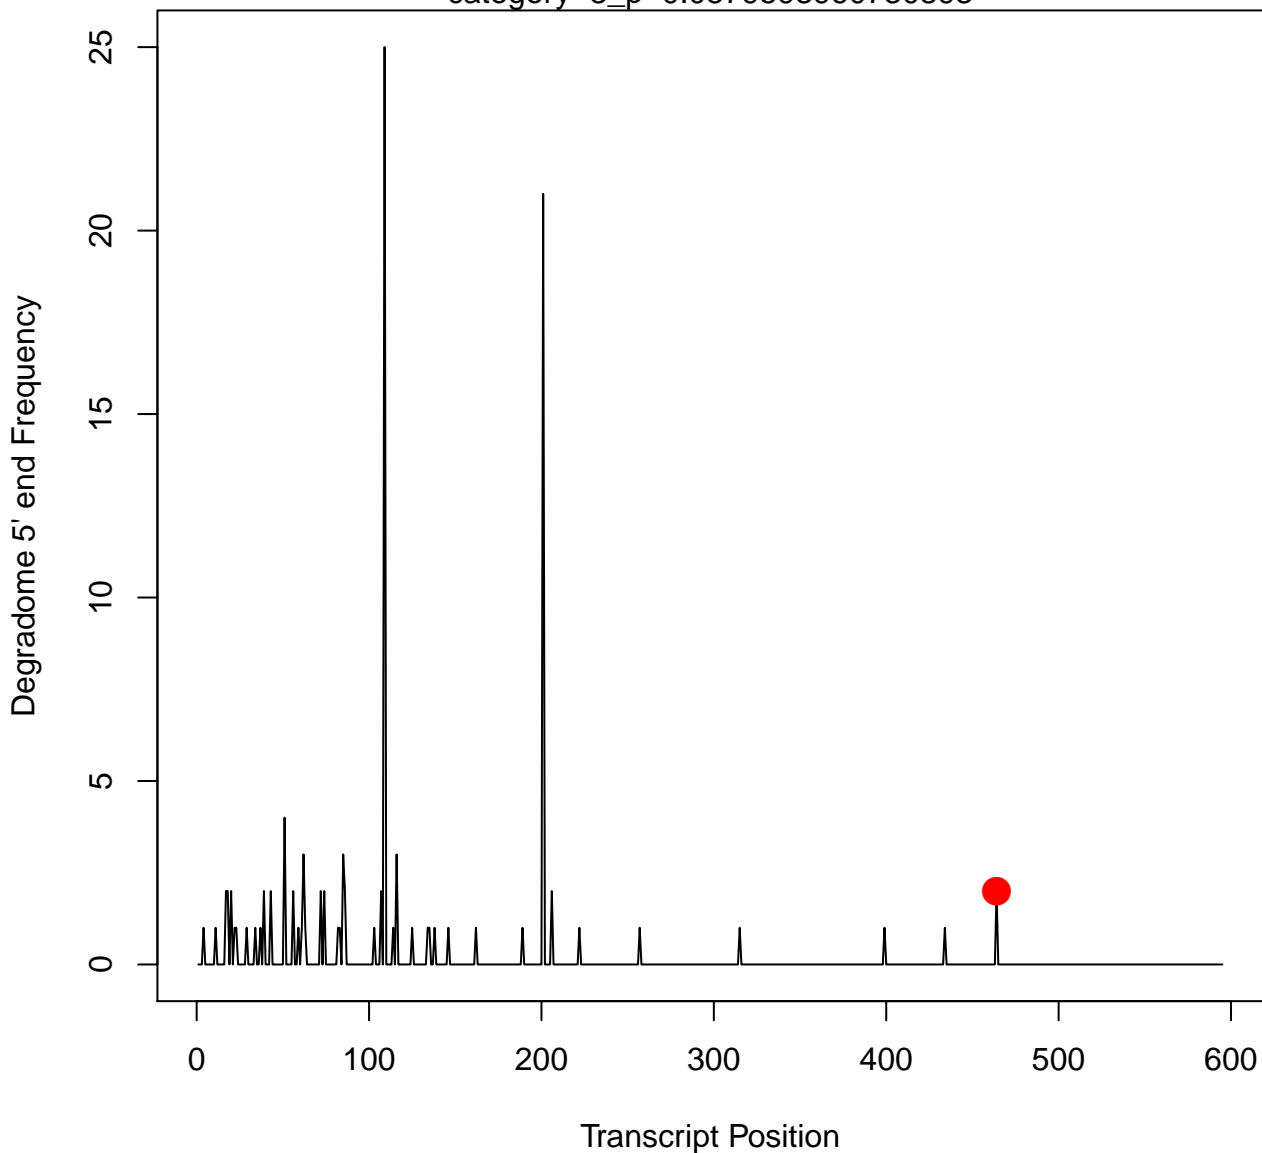

Supplement: s1 [file s1]

**T=Cluster-18410.8318\_Q=novel\_42\_S=120**

category=0\_p=0.000547104903662499

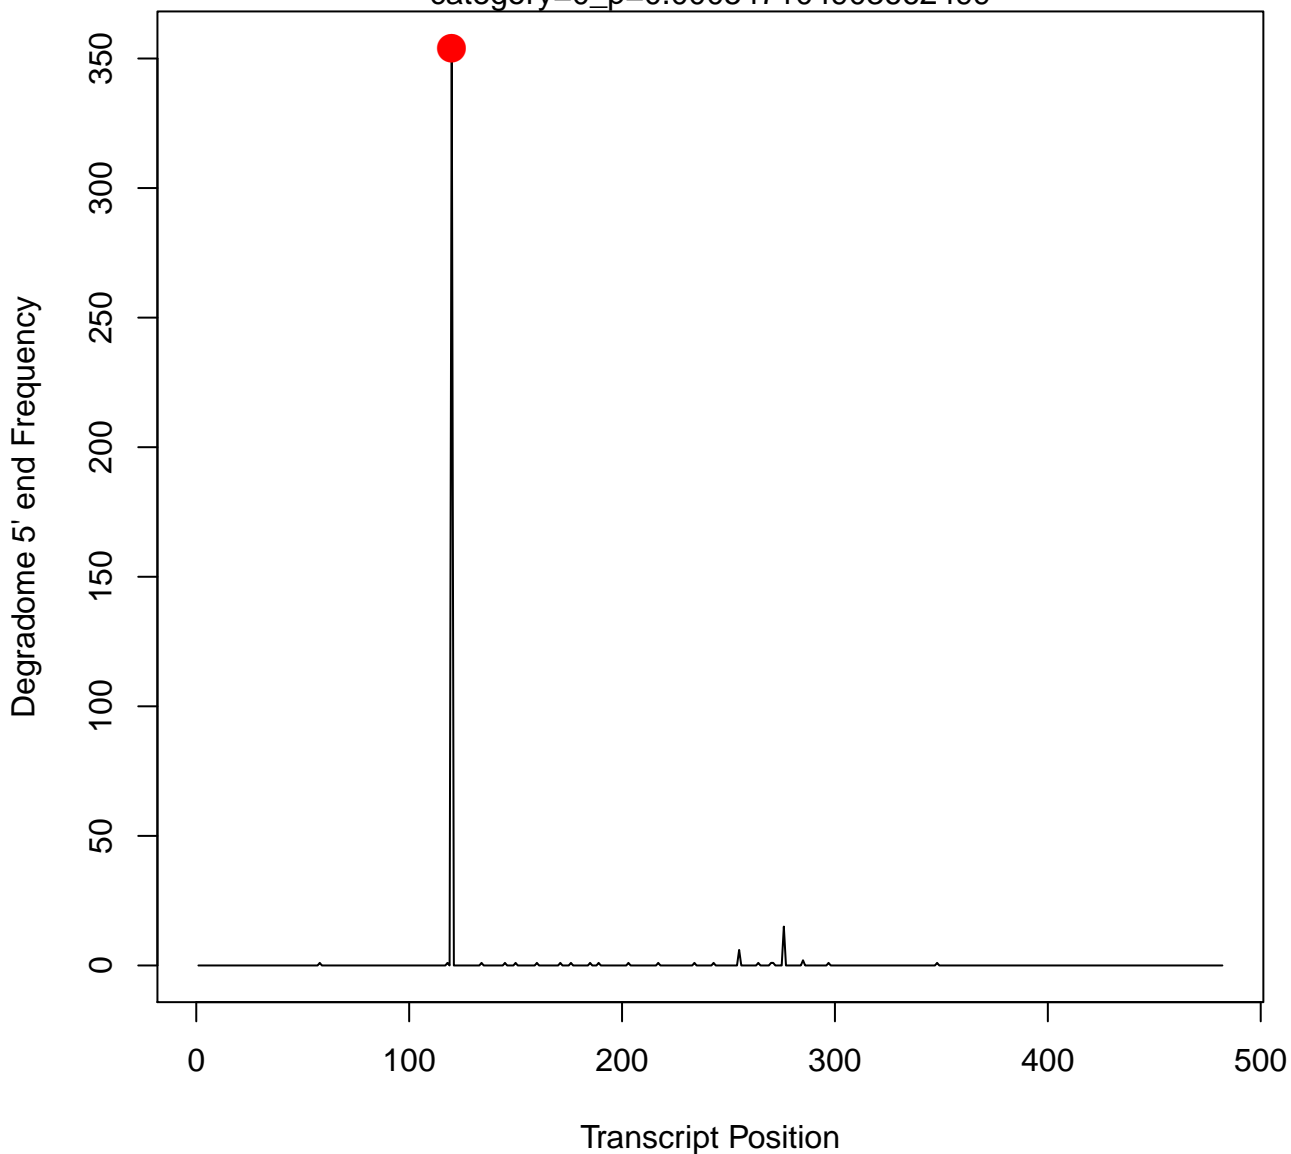

Supplement: s1 [file s1]

**T=Cluster-18410.29481\_Q=novel\_46\_S=787**

category=0\_p=0.00436846732795781

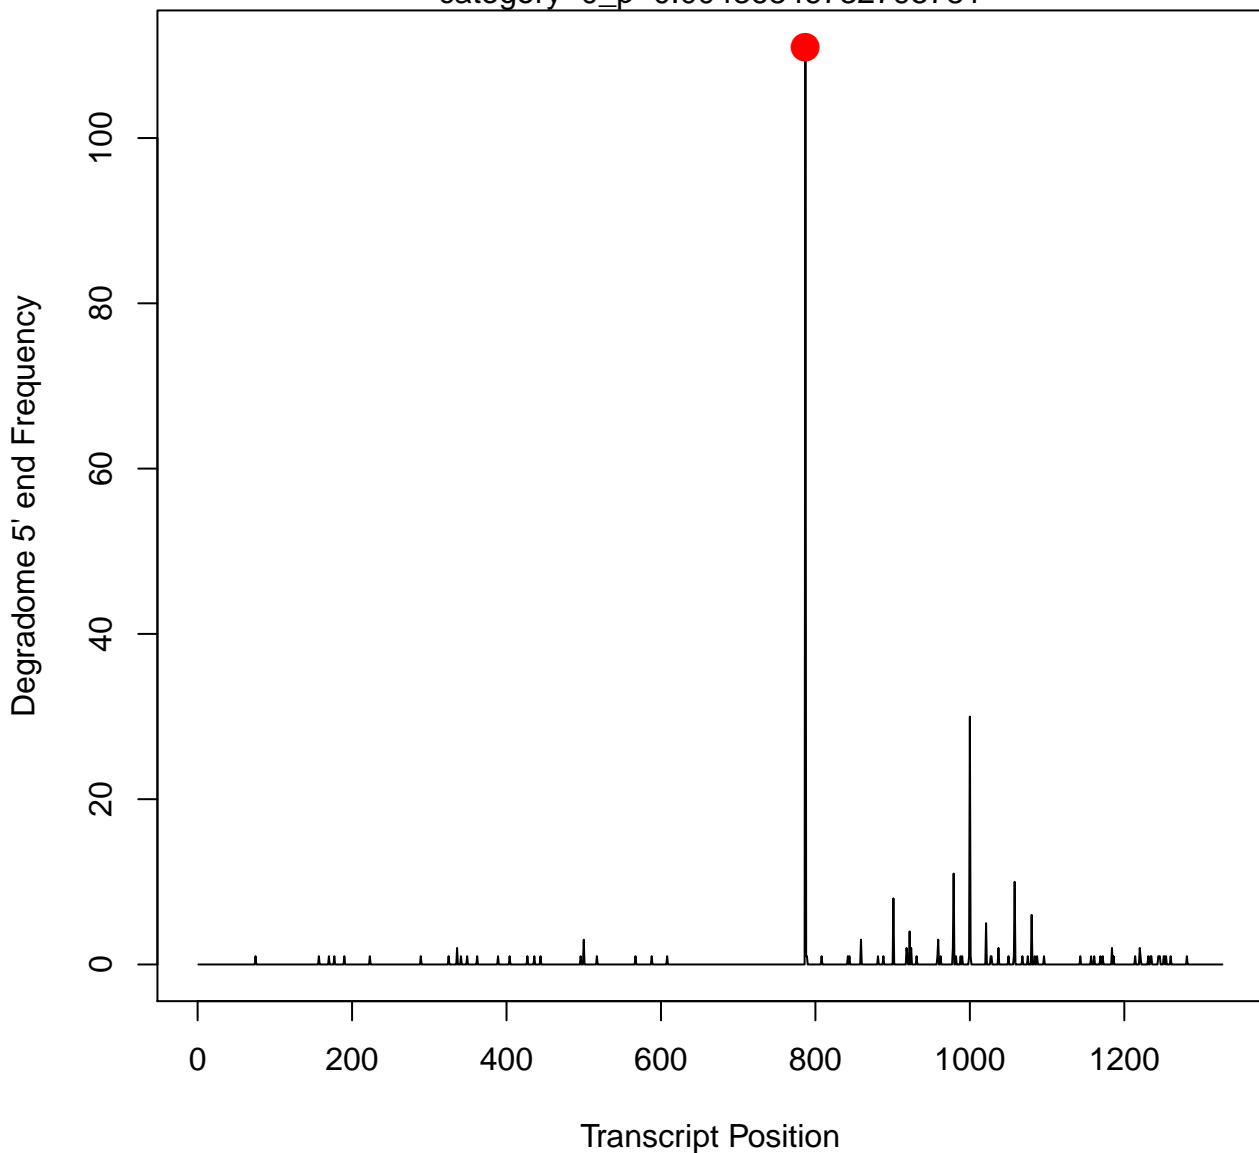

Supplement: s1 [file s1]

**T=Cluster-18410.77200\_Q=pma-miR482a\_S=97**

category=0\_p=0.00218662432695249

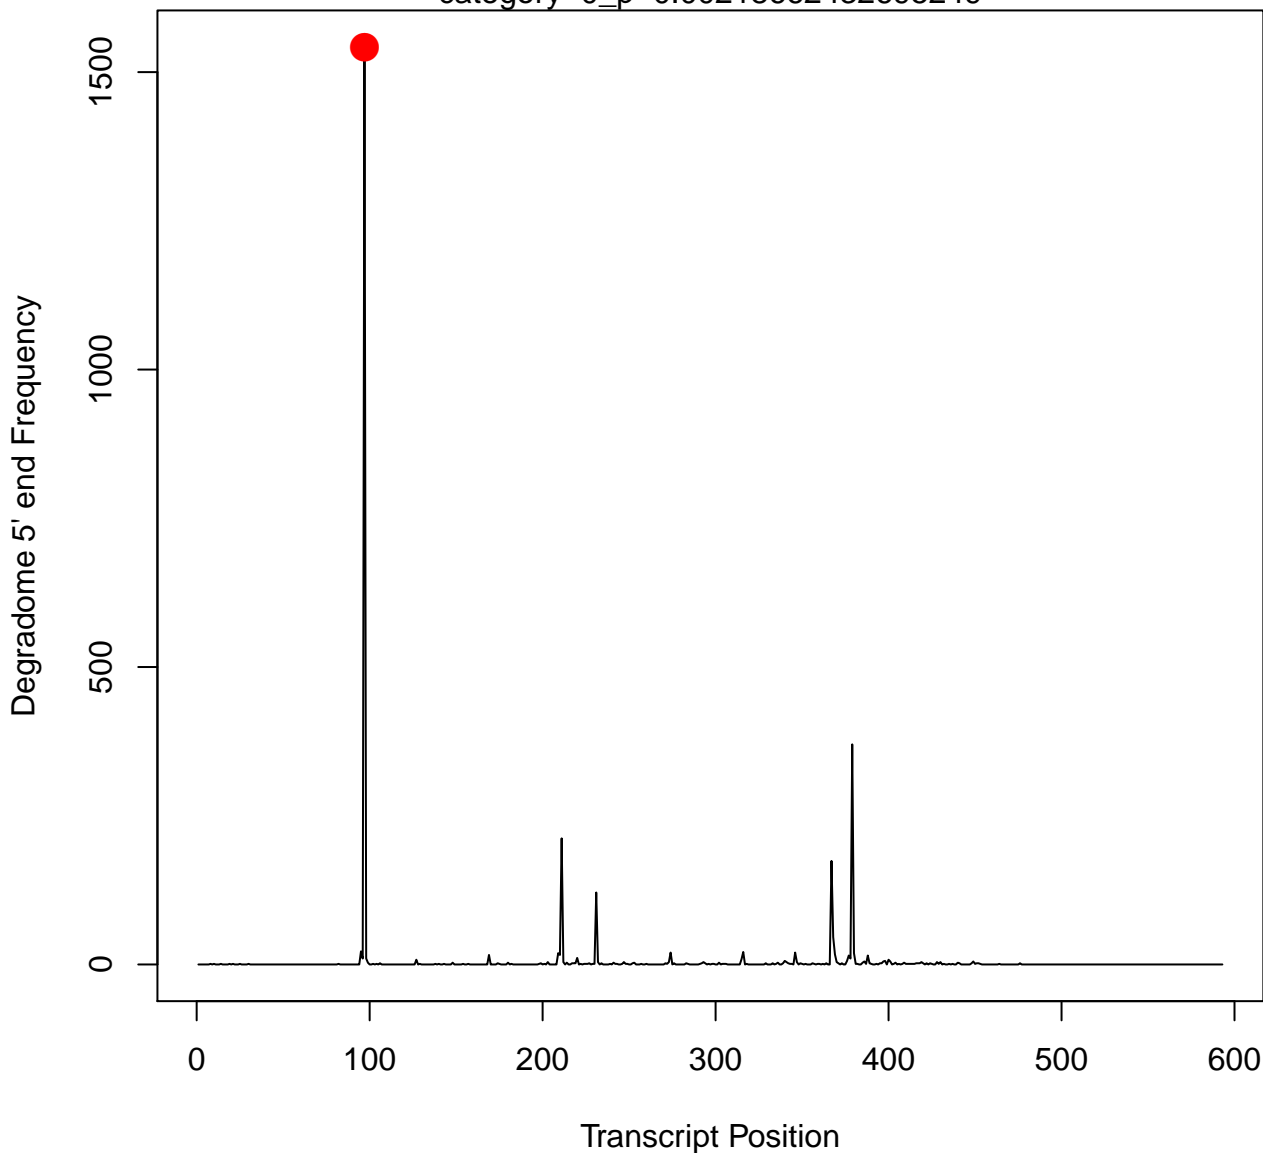

Supplement: s1 [file s1]

**T=Cluster-18410.81823\_Q=novel\_159\_S=880**

category=3\_p=0.0424939132250566

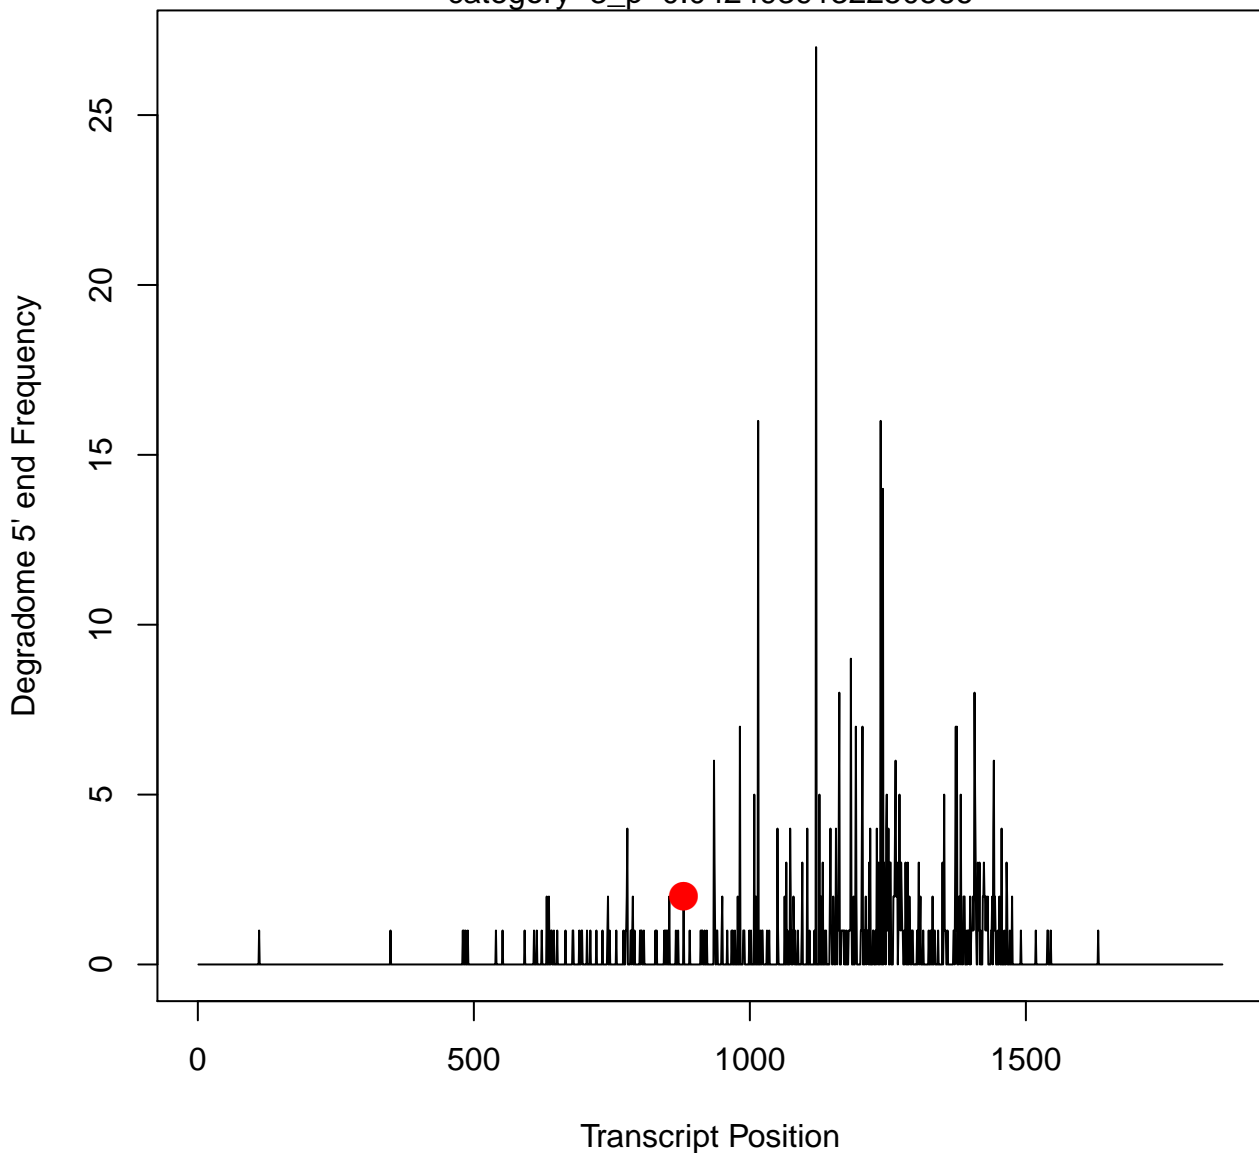

Supplement: s1 [file s1]

**T=Cluster-18410.78668\_Q=novel\_172\_S=403**

category=2\_p=0.0673240995462872

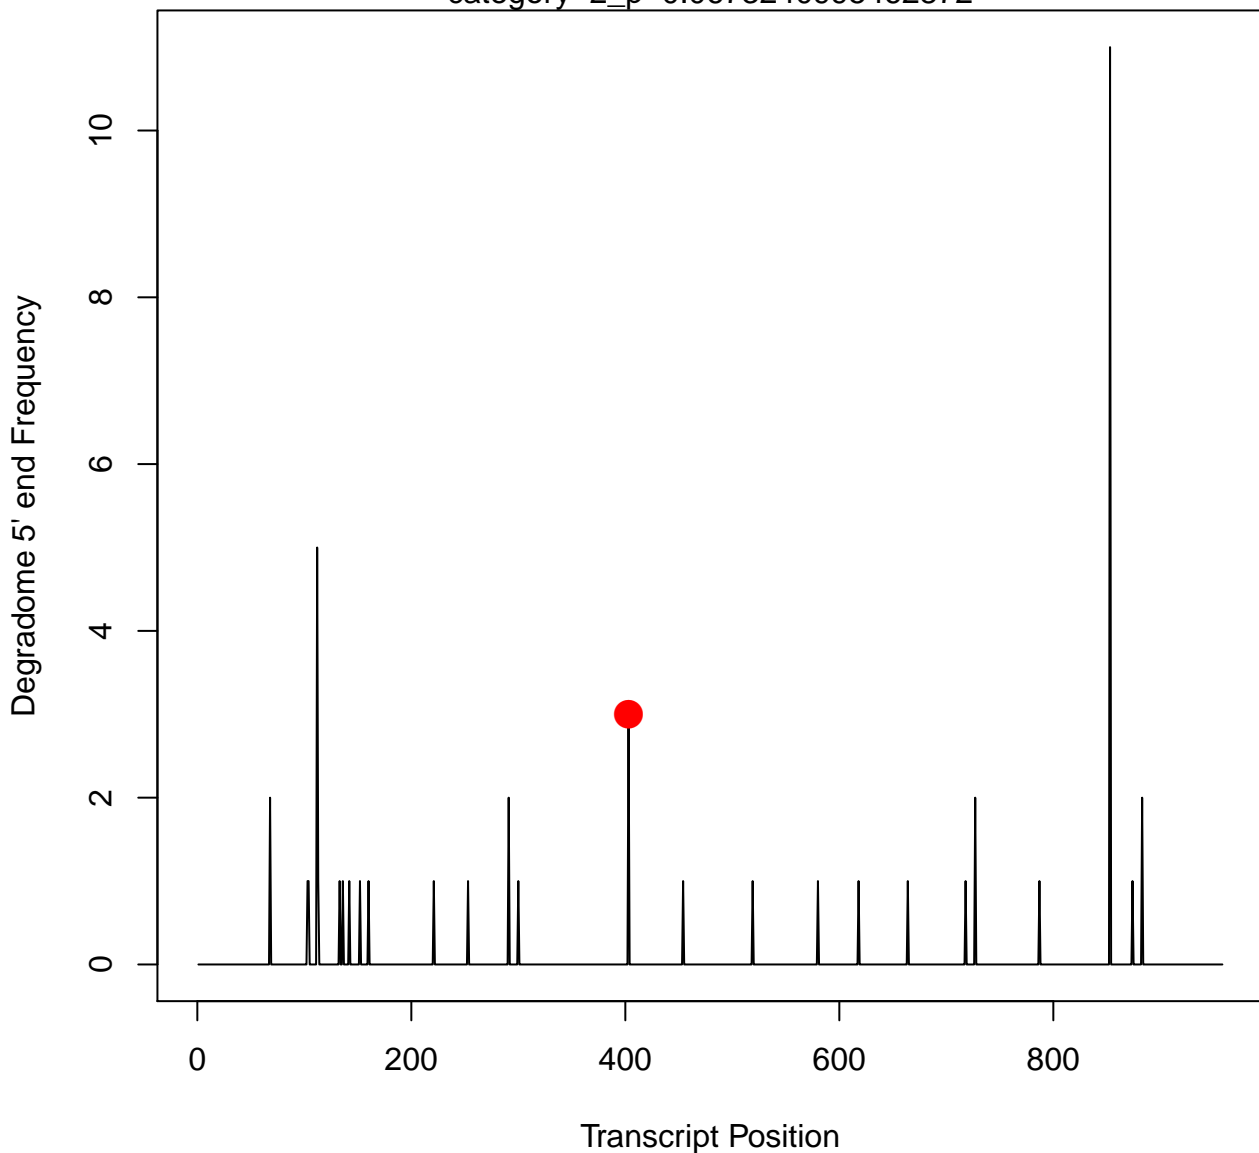

Supplement: s1 [file s1]

**T=Cluster-18410.91670\_Q=pma-miR482a\_S=644**

category=0\_p=0.0865901913148549

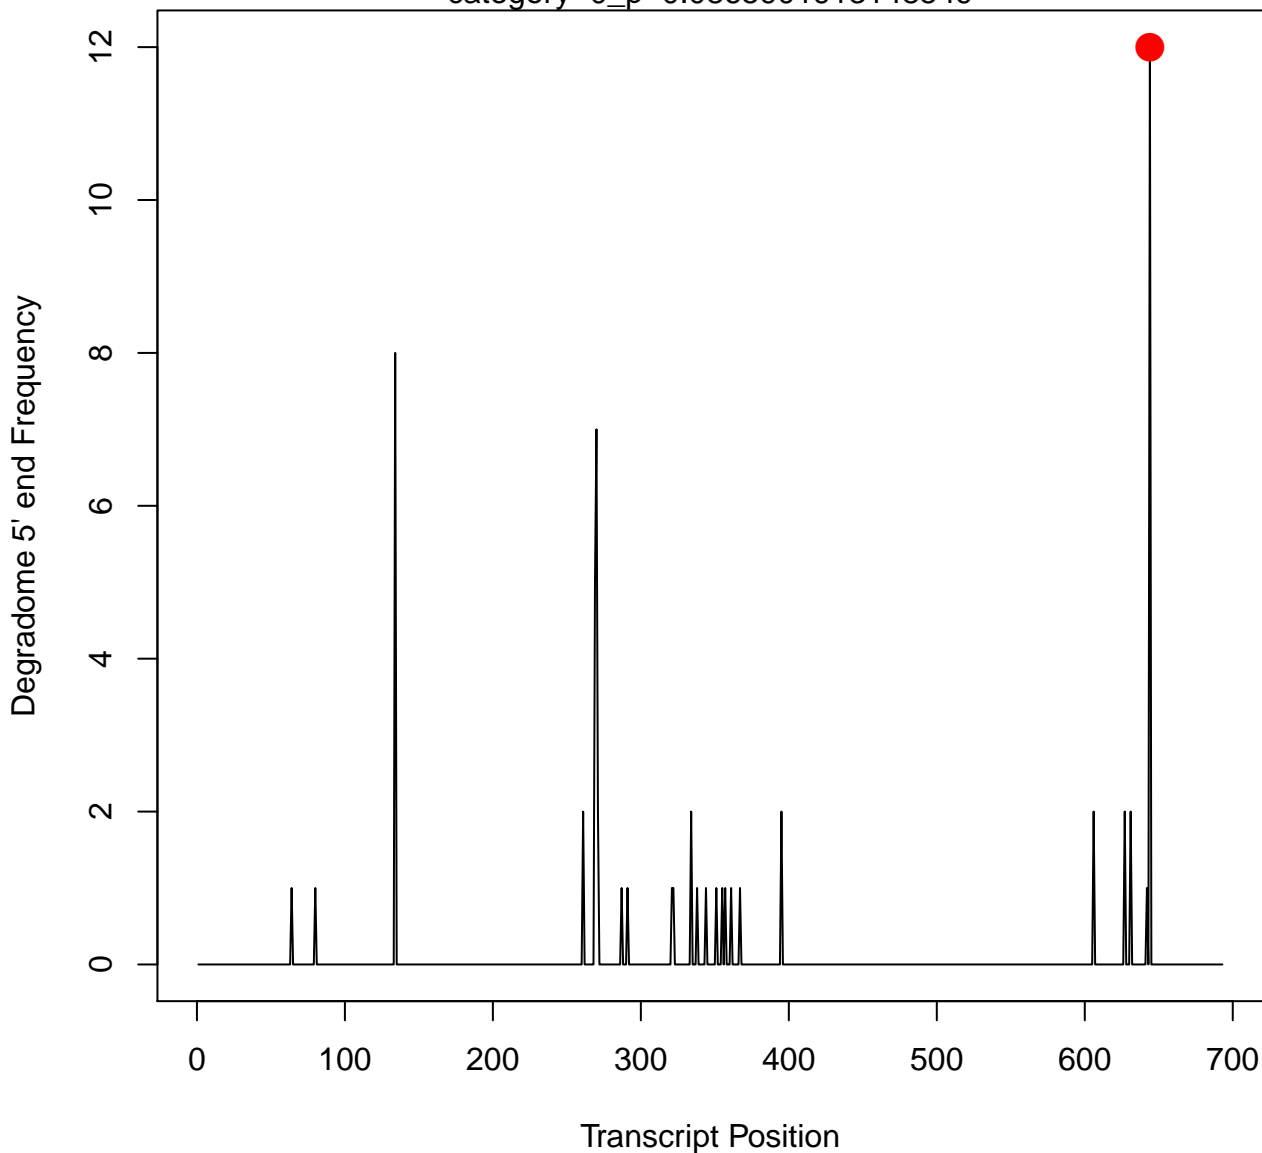

Supplement: s1 [file s1]

**T=Cluster-12819.0\_Q=pma-miR1314\_S=70**

category=0\_p=0.00164041690342198

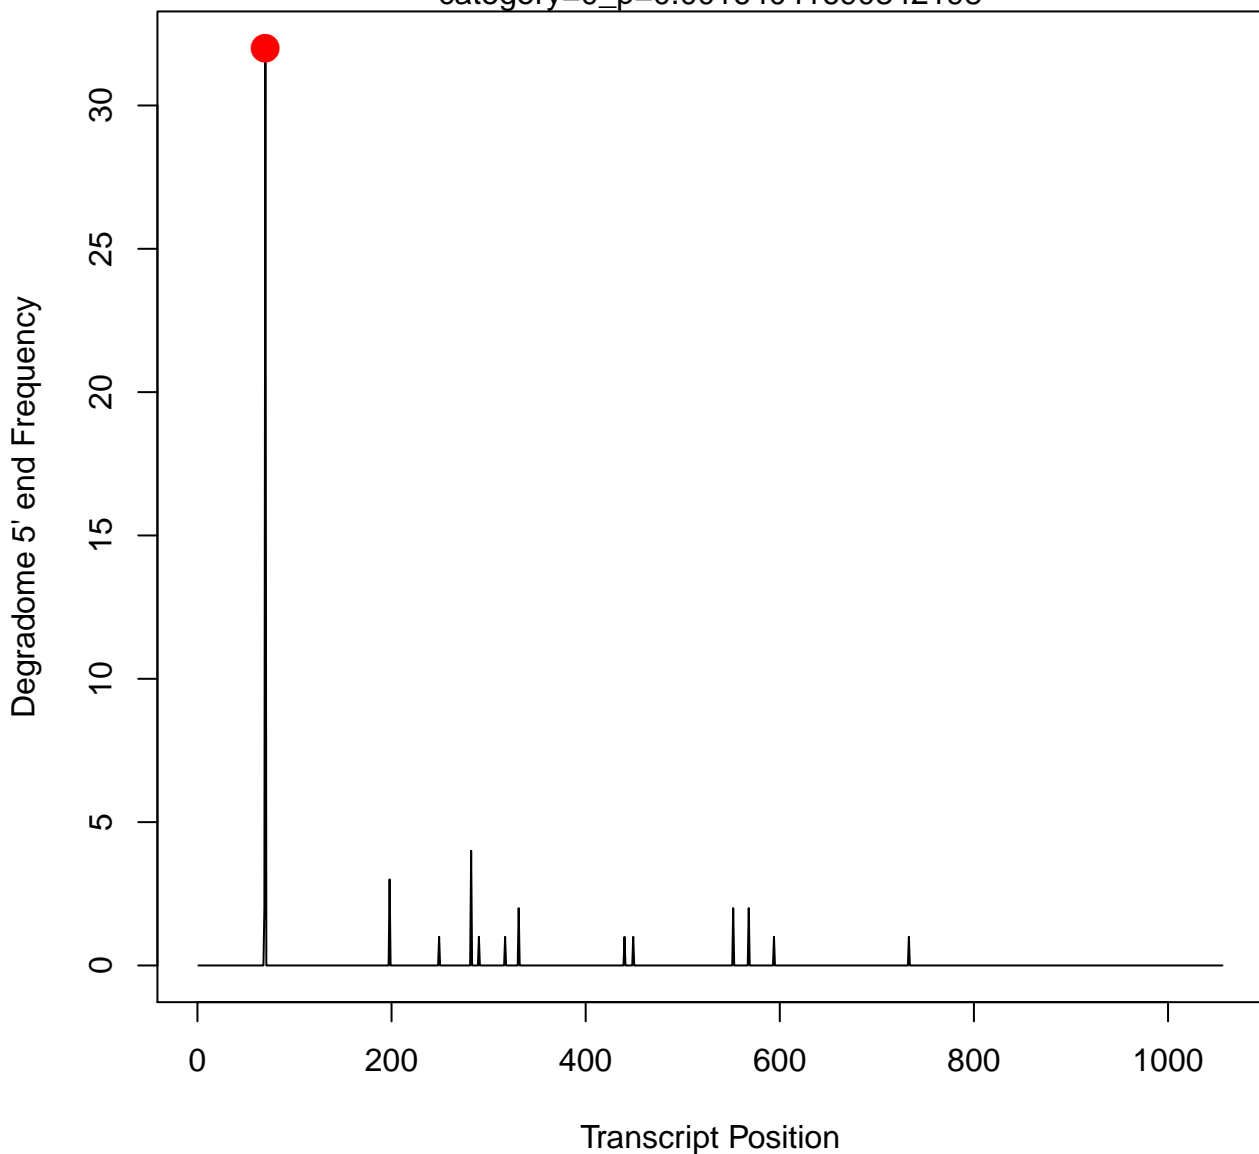

Supplement: s1 [file s1]

**T=Cluster-18410.25996\_Q=pma-miR951\_S=352**

category=0\_p=0.00382345425486719

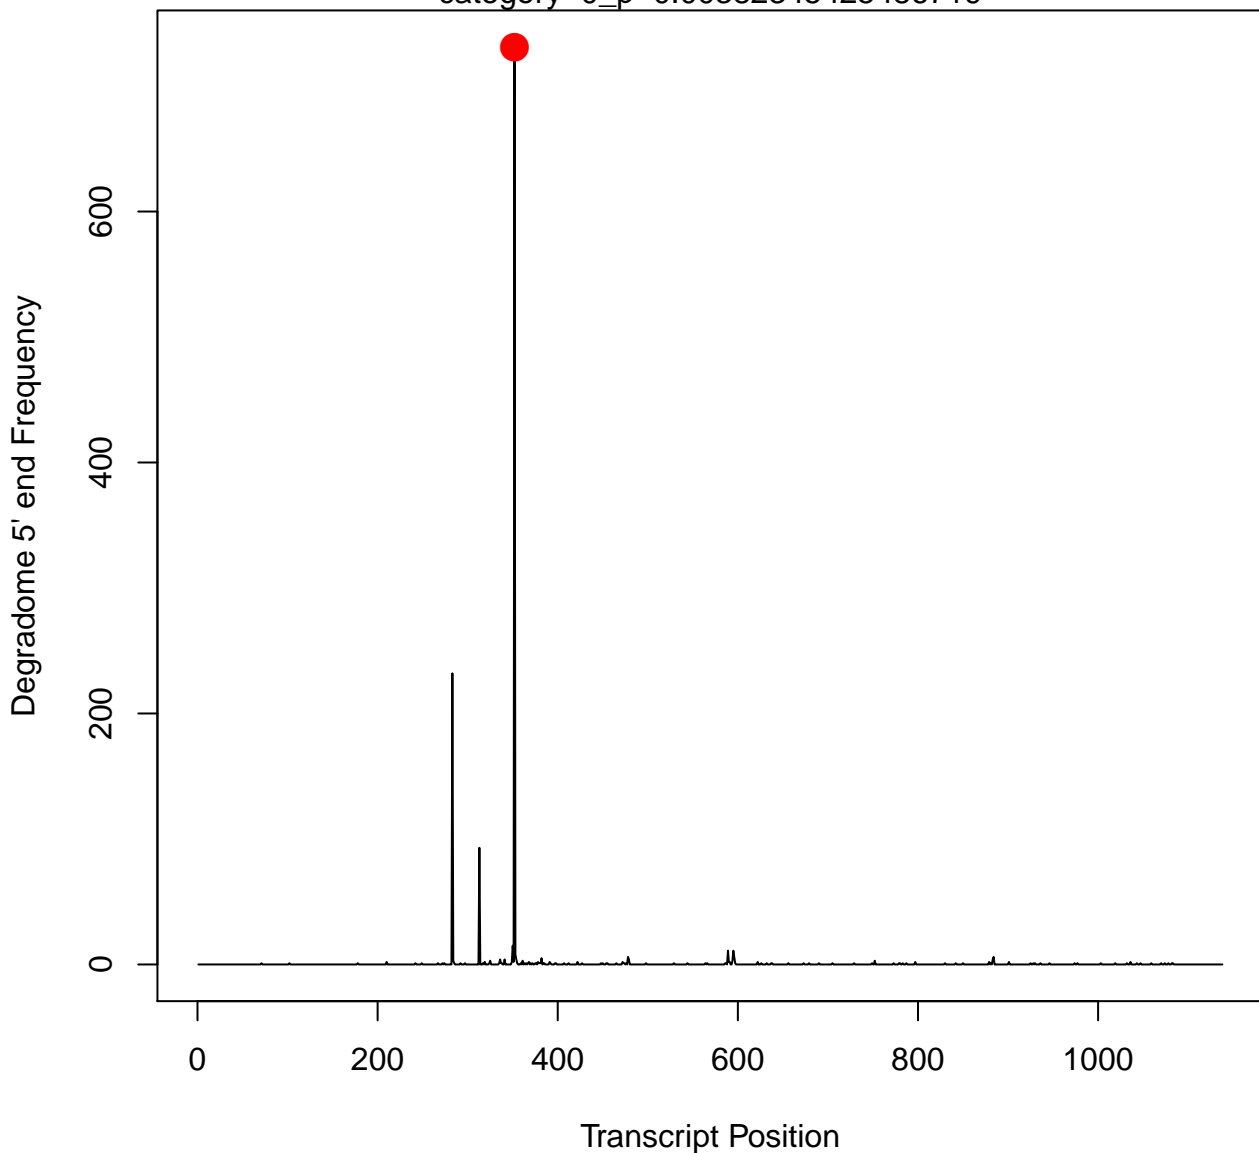

Supplement: s1 [file s1]

**T=Cluster-18410.61722\_Q=novel\_158\_S=715**

category=3\_p=0.0579593960730893

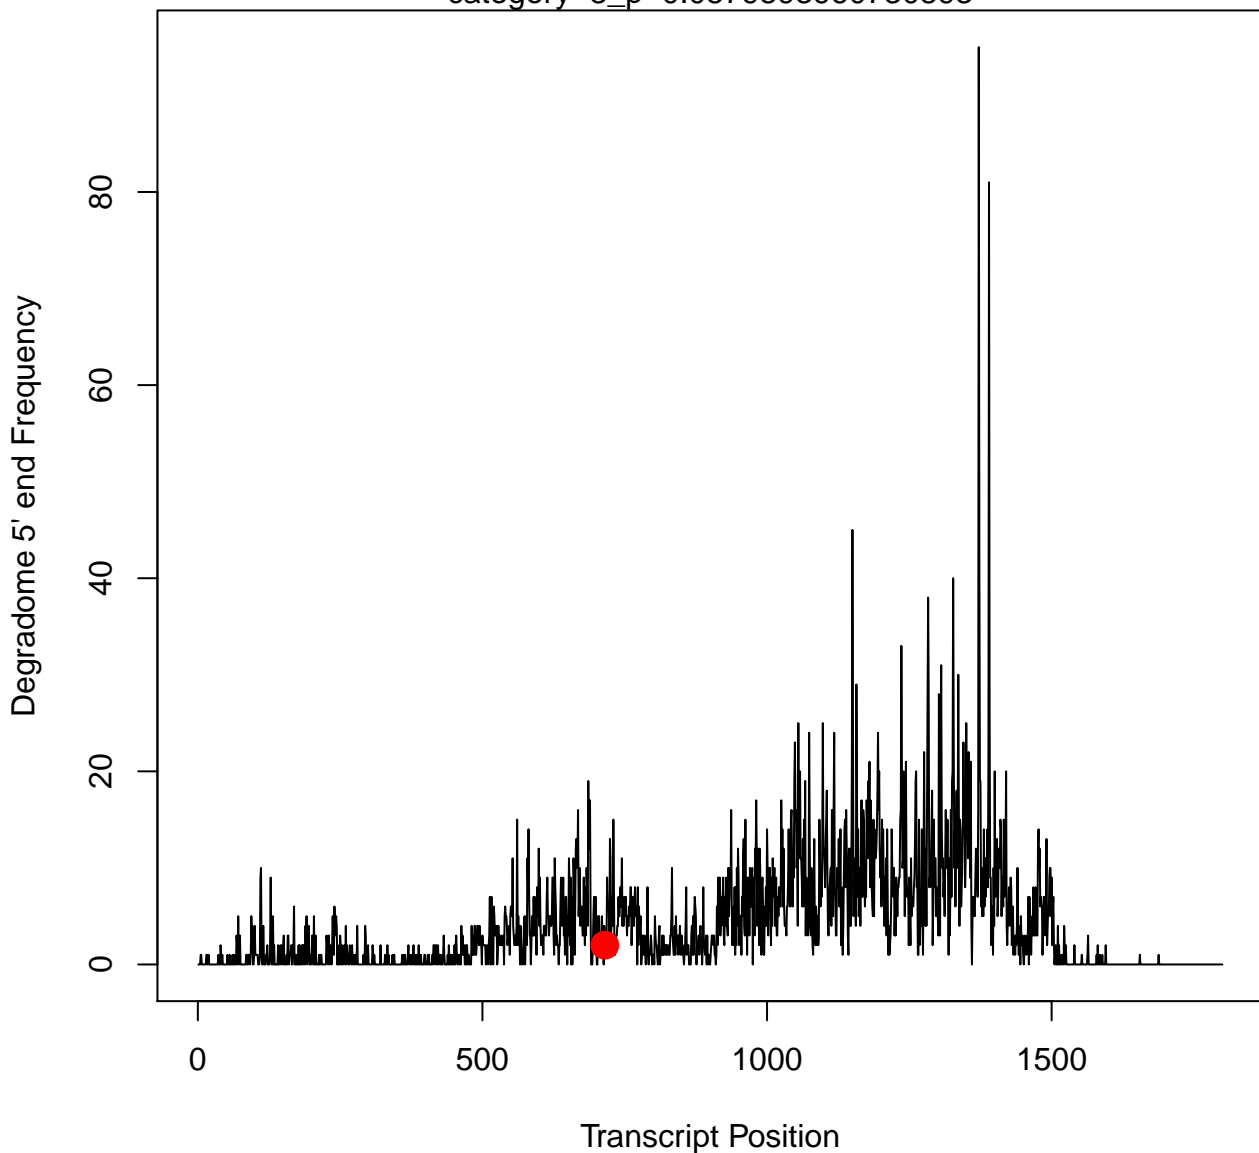

Supplement: s1 [file s1]

**T=Cluster-11679.0\_Q=novel\_153\_S=766**

category=1\_p=0.0212949941468841

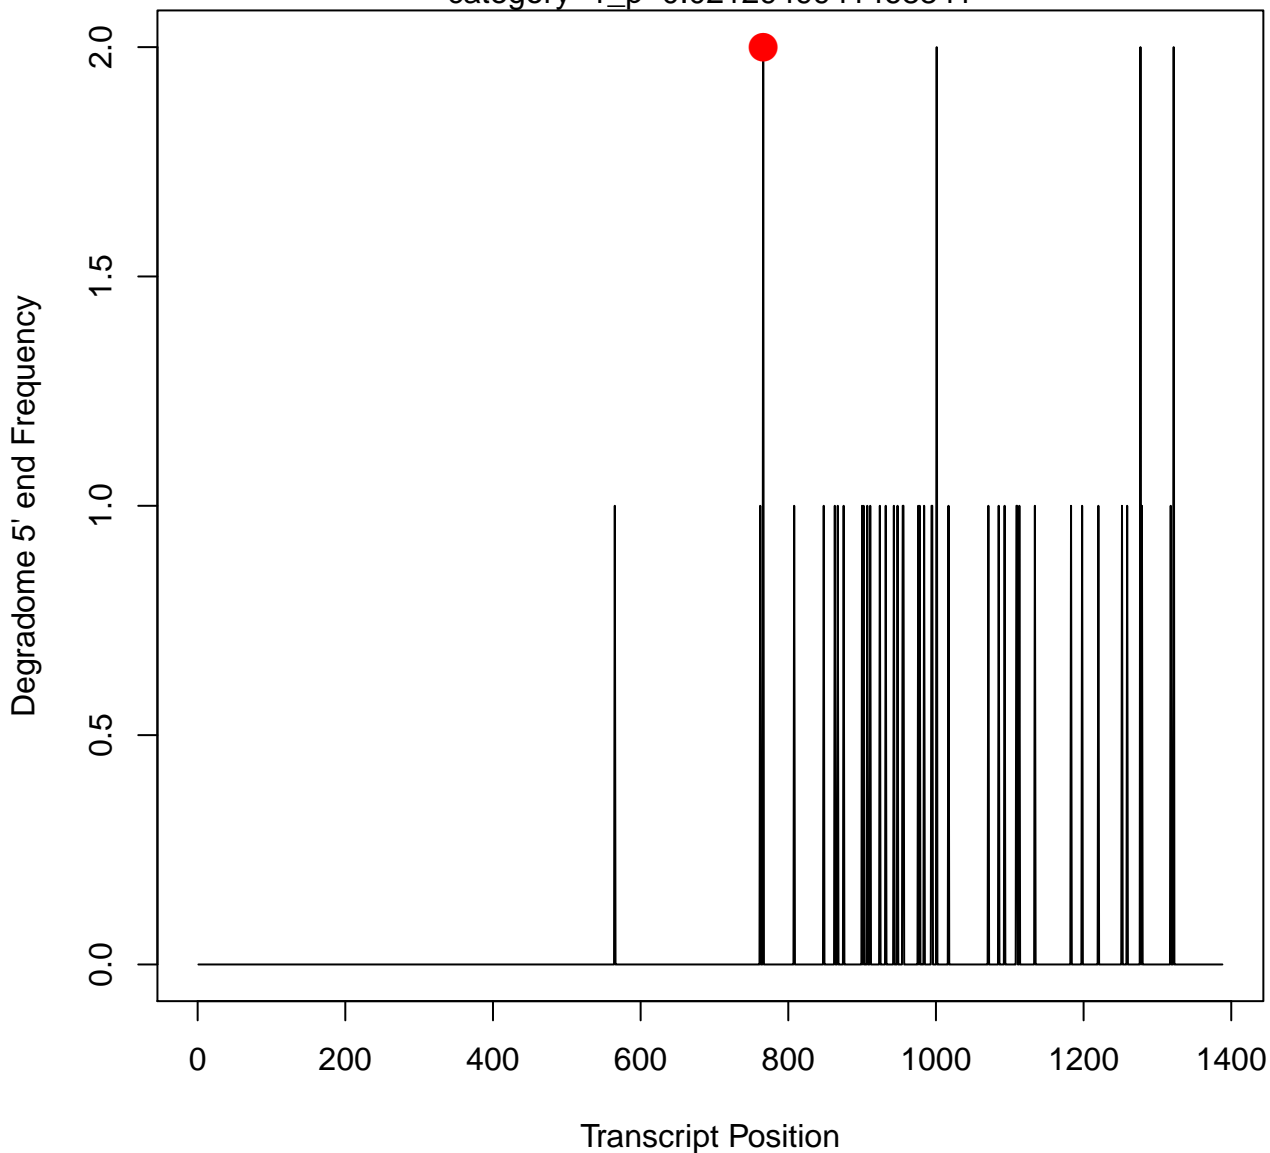

Supplement: s1 [file s1]

**T=Cluster-18410.32925\_Q=pma-miR319\_S=2123**

category=0\_p=0.00464086203705827

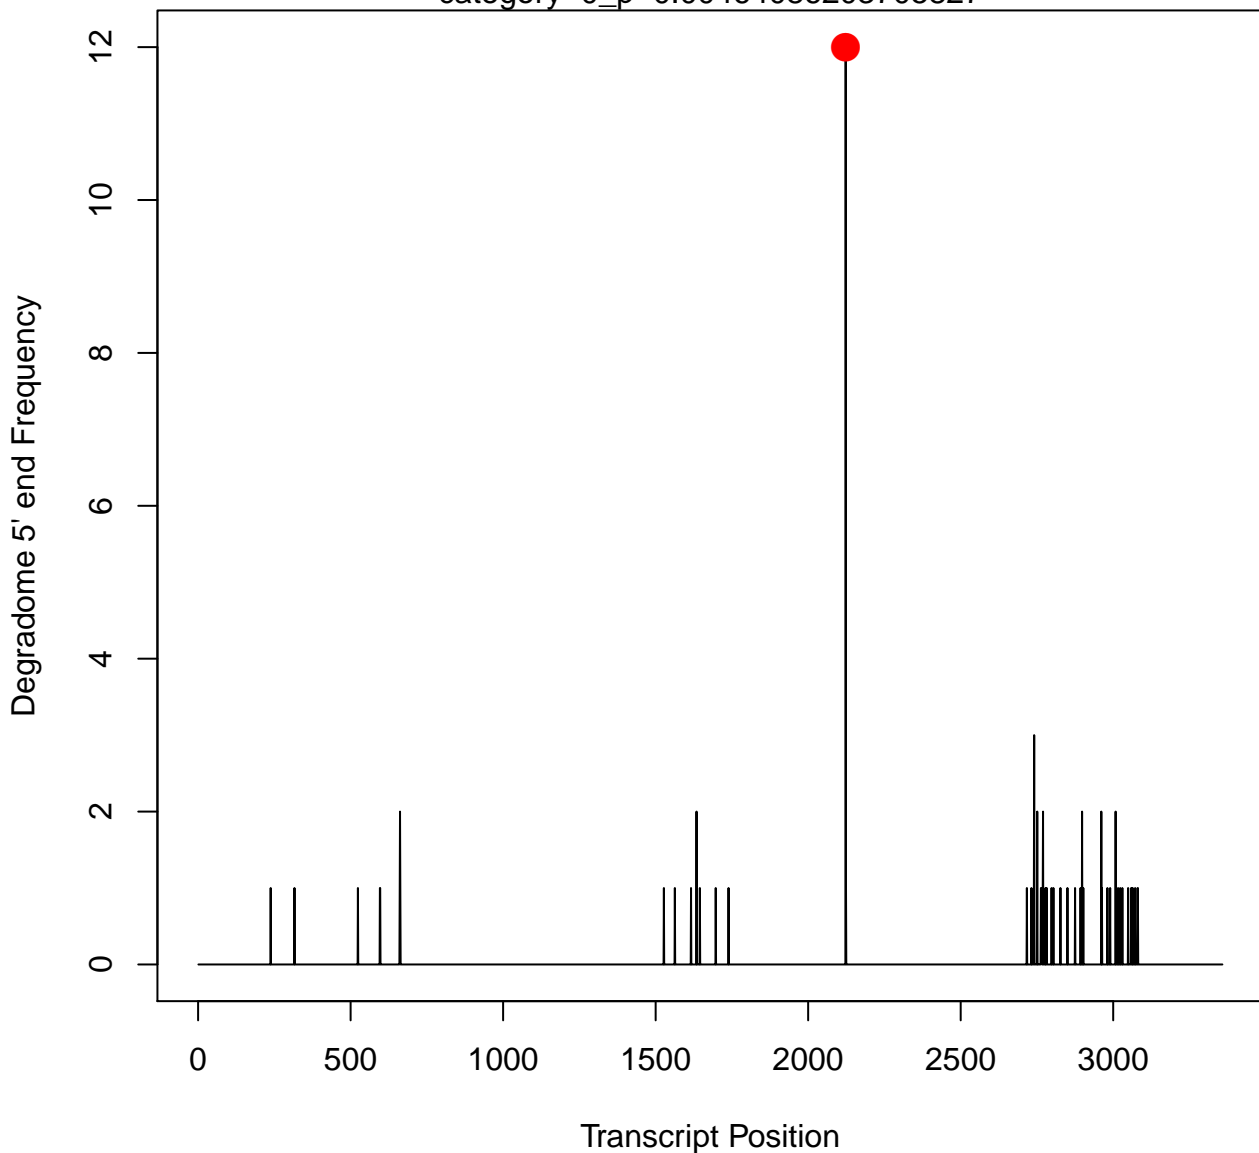

Supplement: s1 [file s1]

**T=Cluster-18410.72851\_Q=novel\_35\_S=184**

category=0\_p=0.00844657216822353

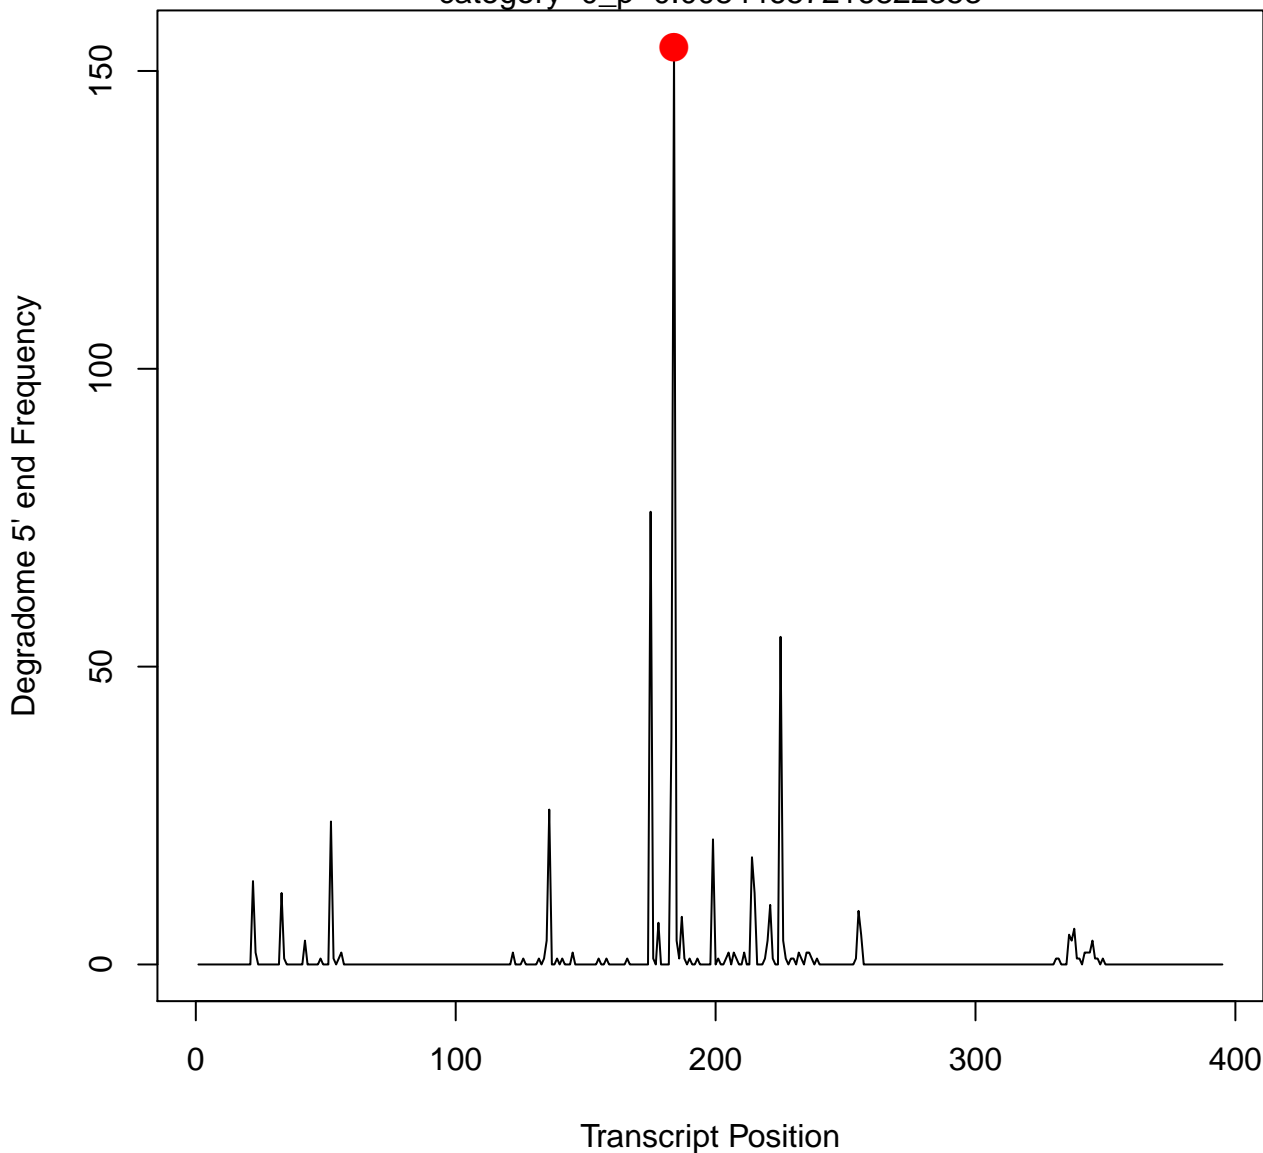

Supplement: s1 [file s1]

**T=Cluster-18410.26041\_Q=novel\_80\_S=76**

category=0\_p=0.0417876447356107

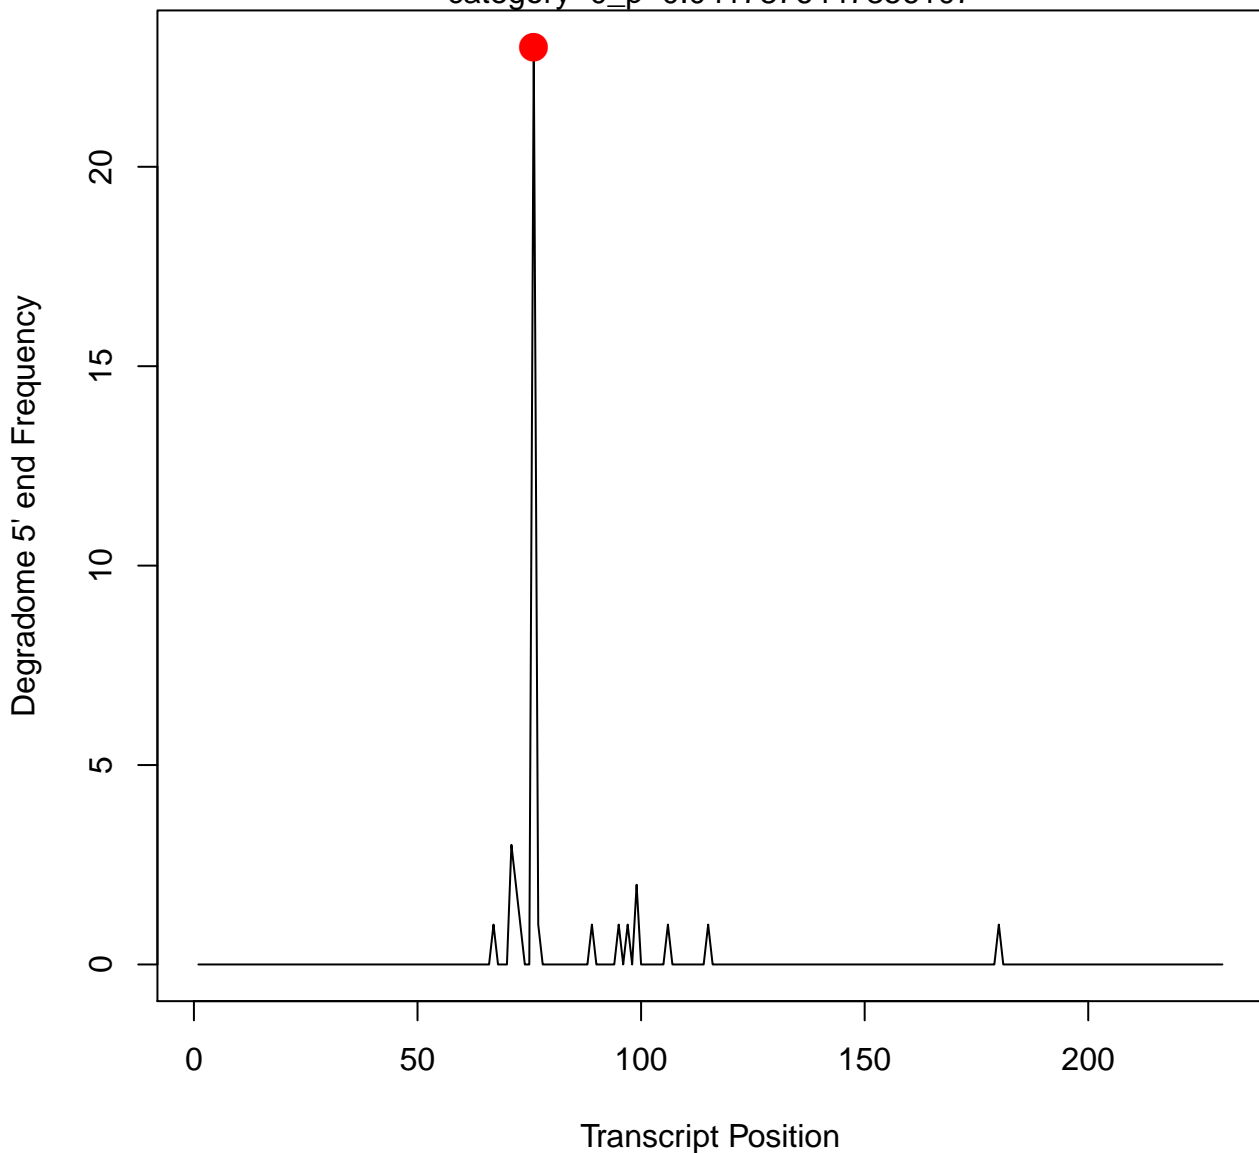

Supplement: s1 [file s1]

**T=Cluster-18410.69869\_Q=novel\_32\_S=925**

category=0\_p=0.00436846732795781

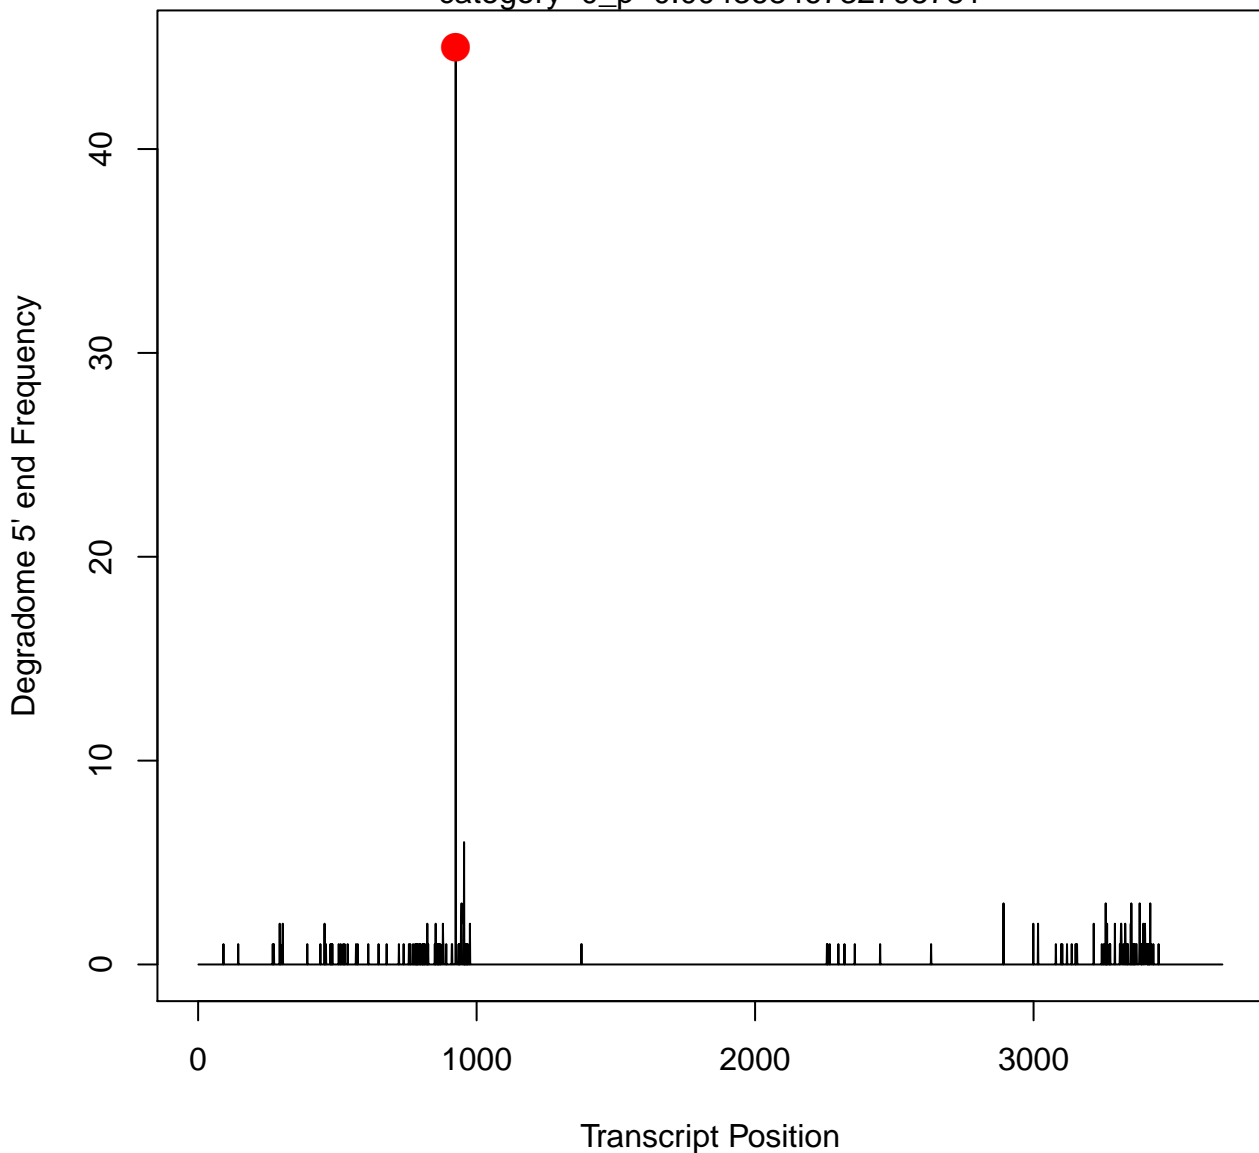

Supplement: s1 [file s1]

**T=Cluster-18410.26763\_Q=pma-miR951\_S=161**

category=0\_p=0.0135882009795663

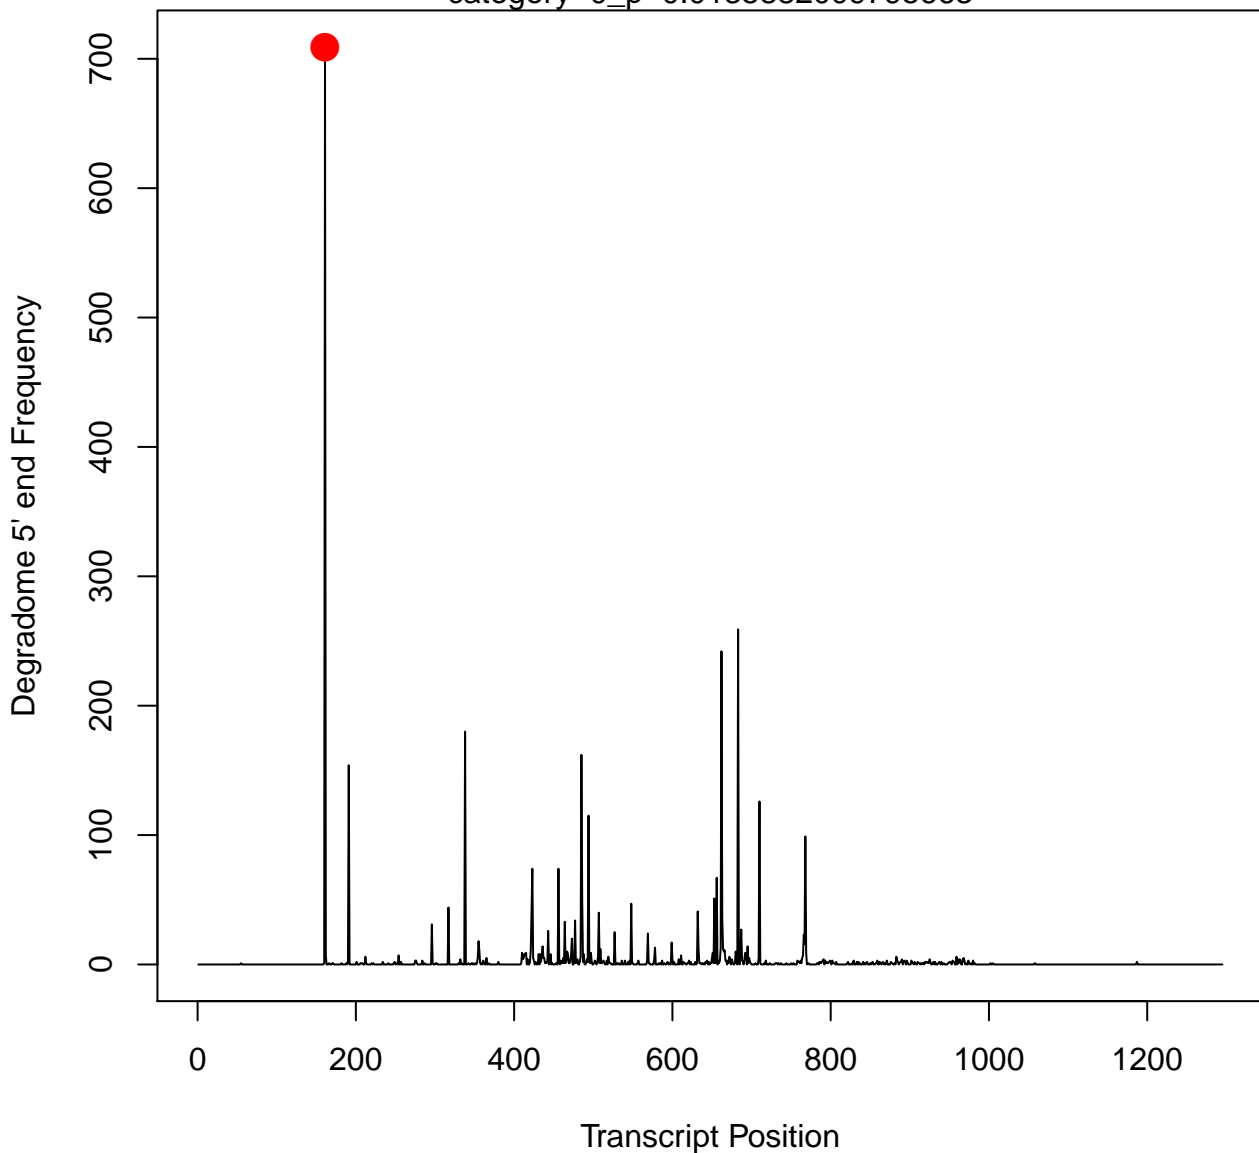

Supplement: s1 [file s1]

**T=Cluster-18410.32928\_Q=pma-miR319\_S=2895**

category=0\_p=0.00436846732795781

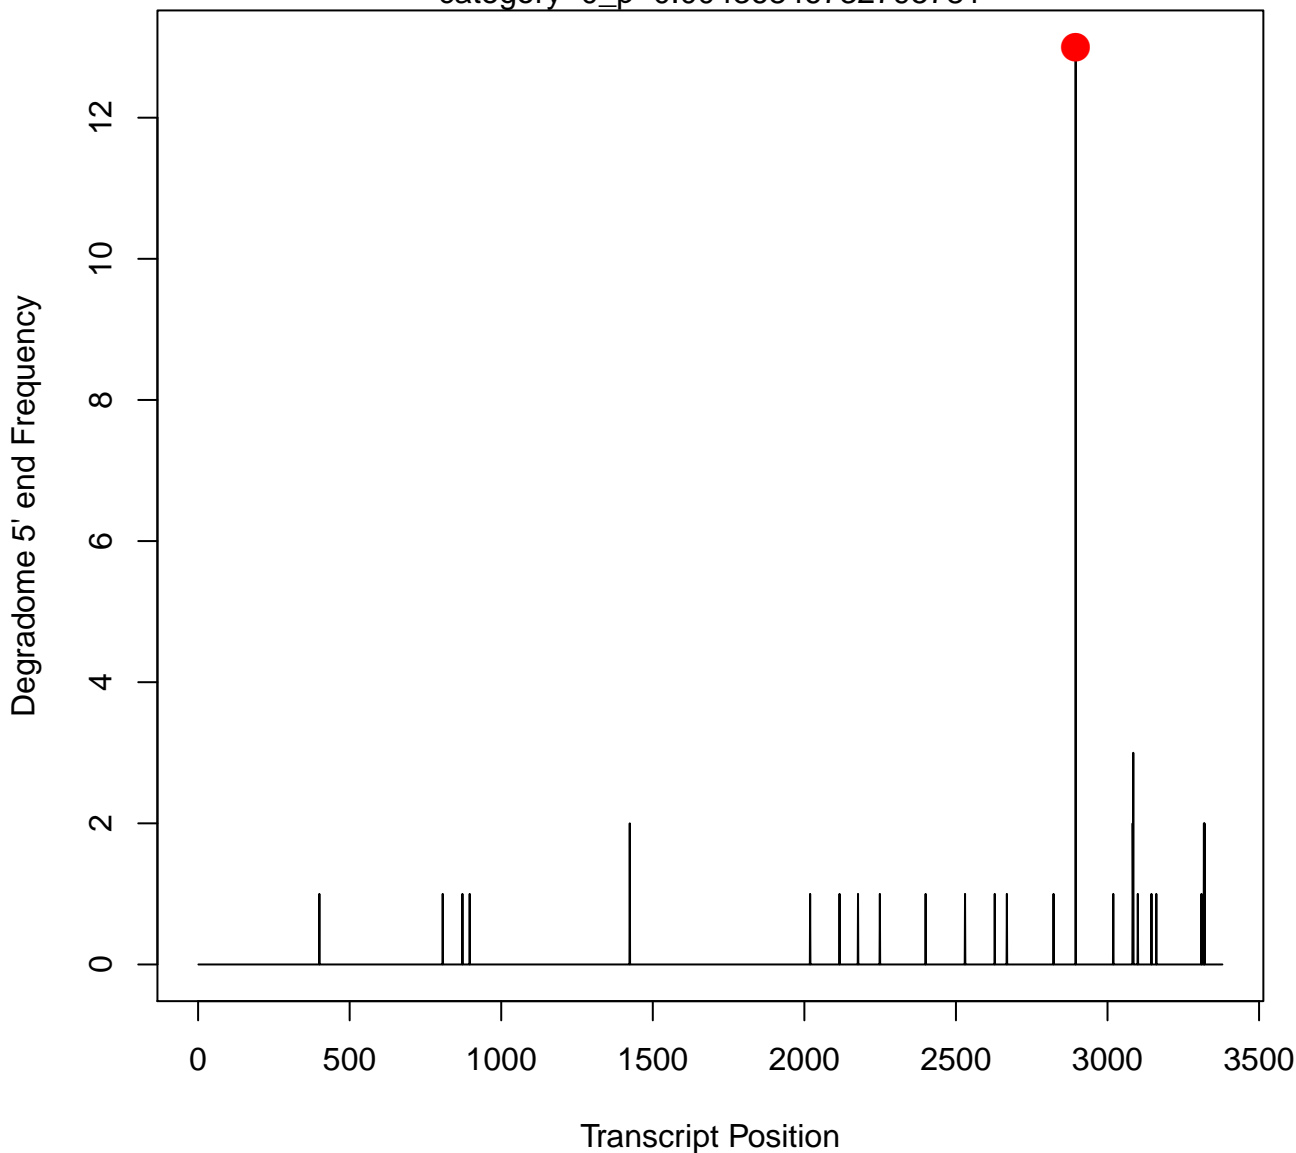

Supplement: s1 [file s1]

**T=Cluster-18410.77069\_Q=novel\_161\_S=341**

category=3\_p=0.0831820937889345

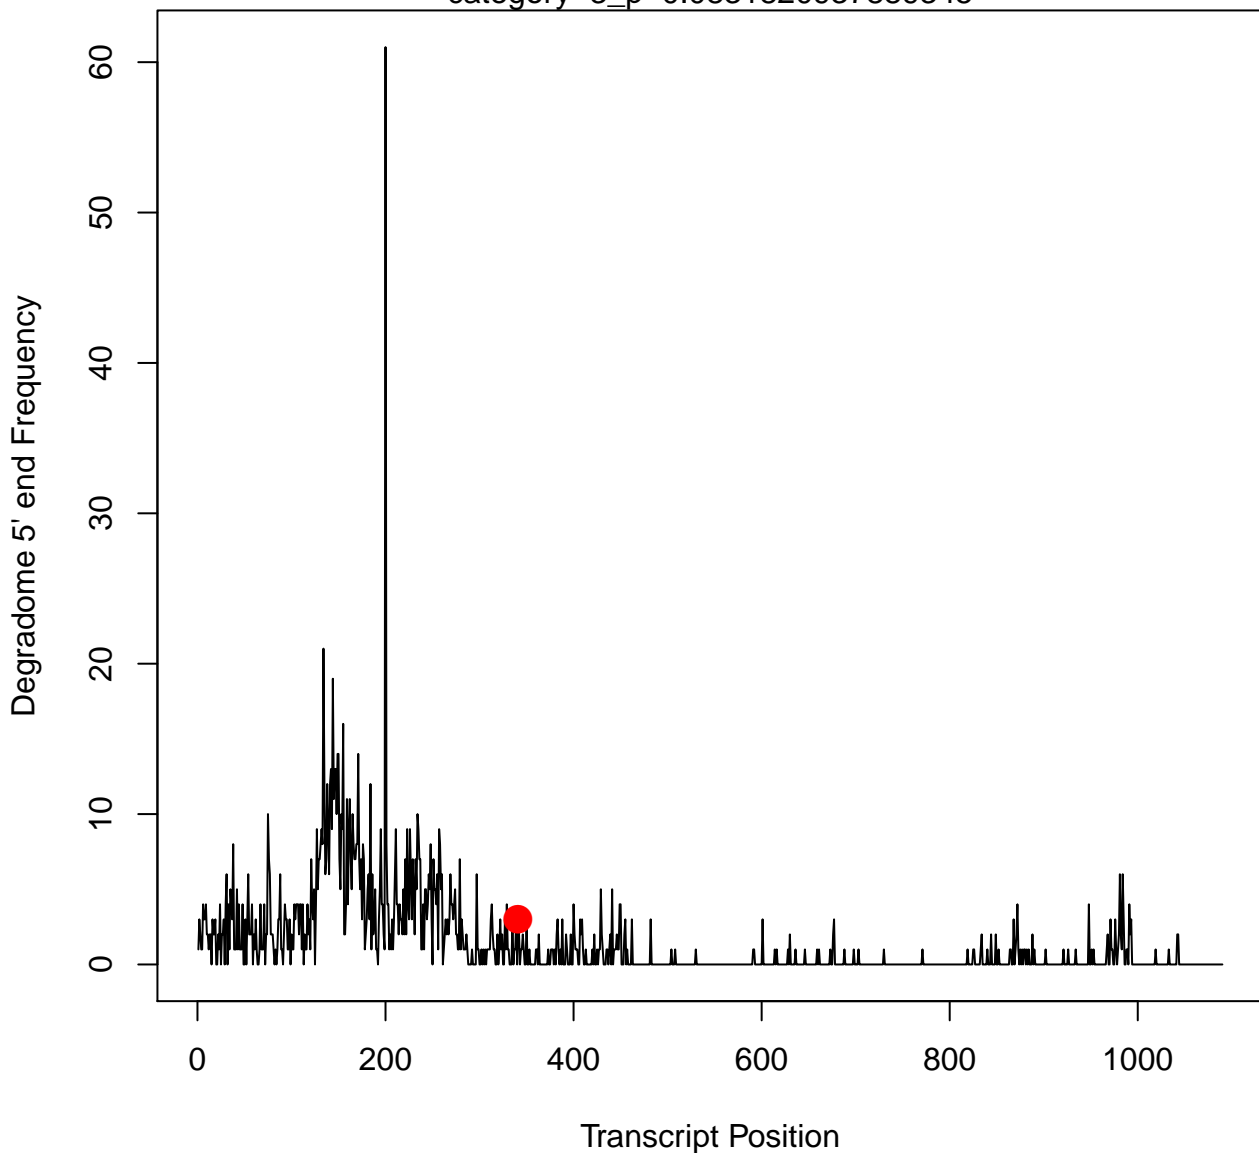

Supplement: s1 [file s1]

**T=Cluster-18410.44602\_Q=novel\_82\_S=583**

category=1\_p=0.0219054306230881

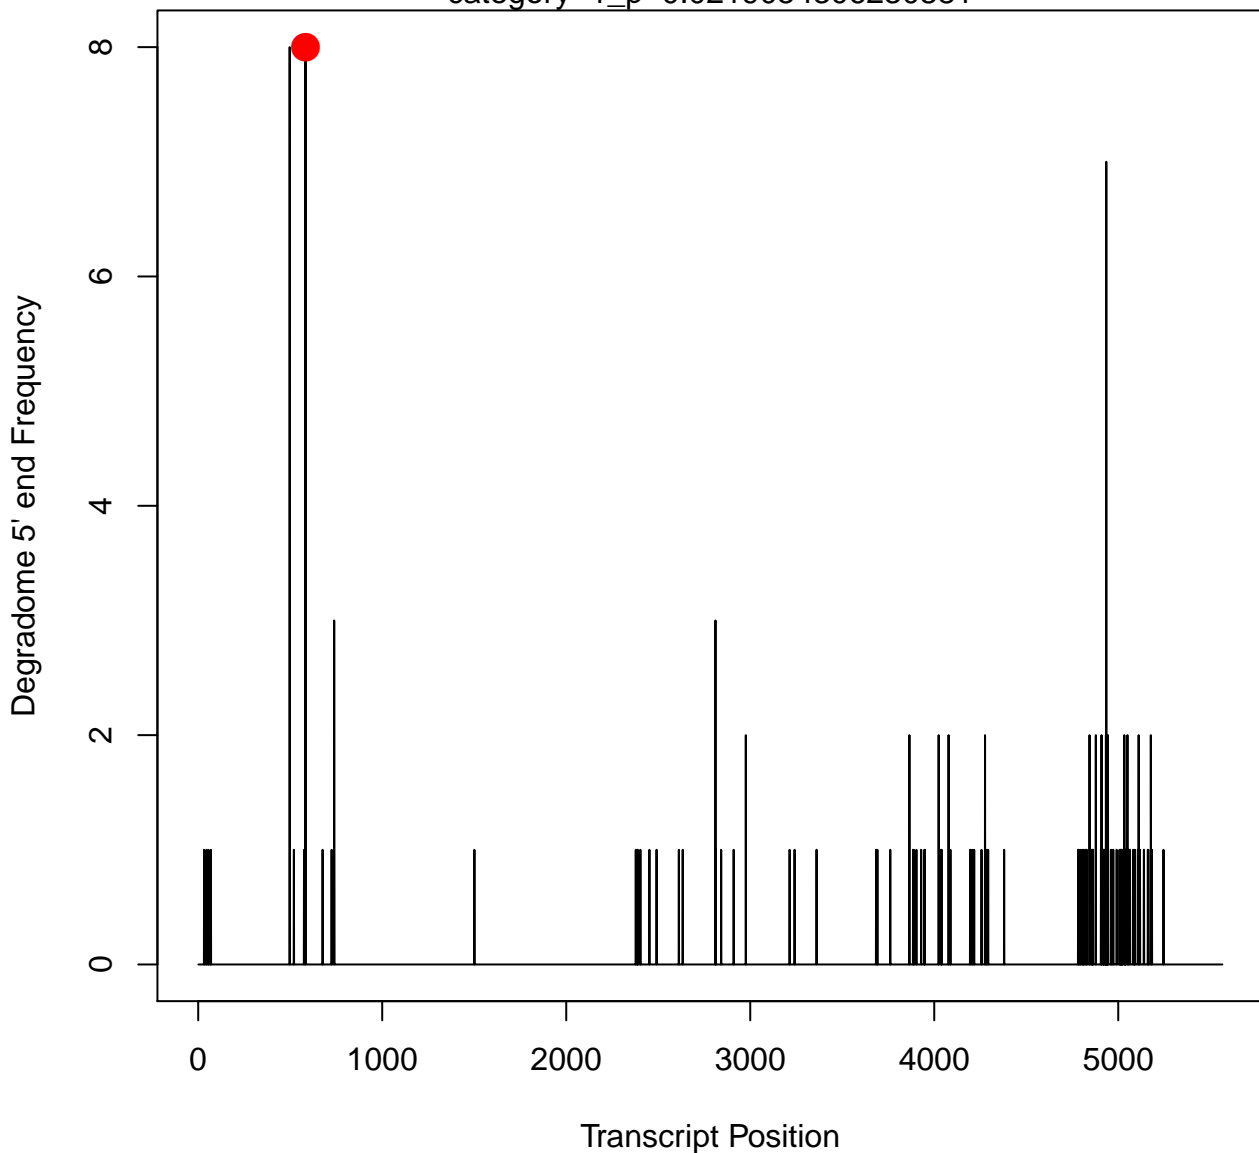

Supplement: s1 [file s1]

**T=Cluster-18410.60776\_Q=novel\_109\_S=215**

category=0\_p=0.00027358987754178

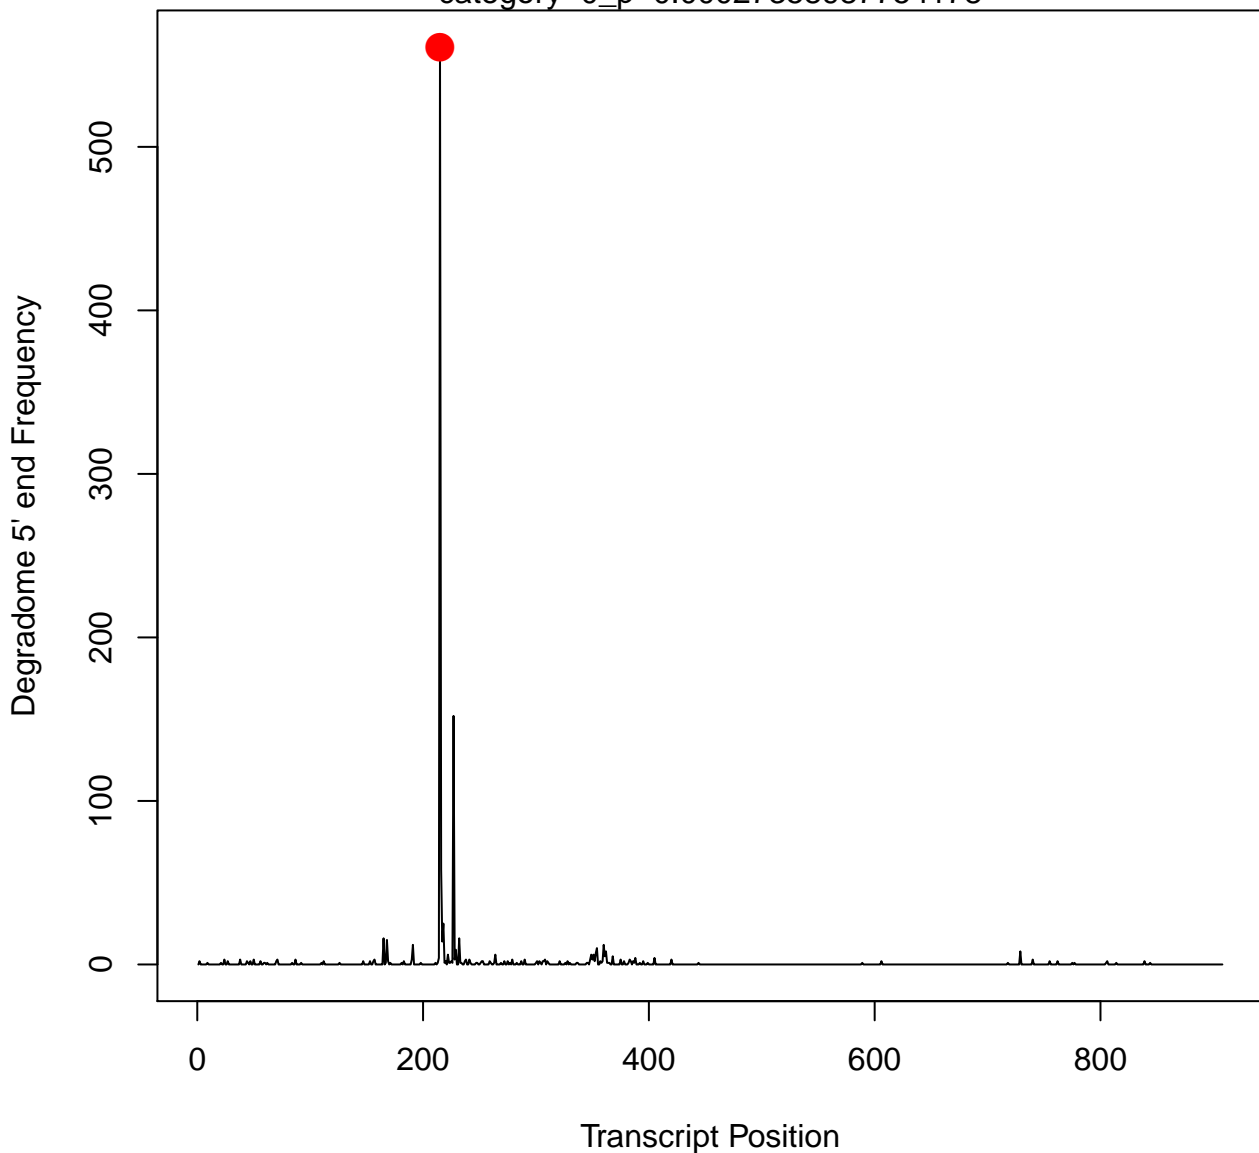

Supplement: s1 [file s1]

**T=Cluster-7244.0\_Q=novel\_34\_S=33**

category=0\_p=0.00898905591083365

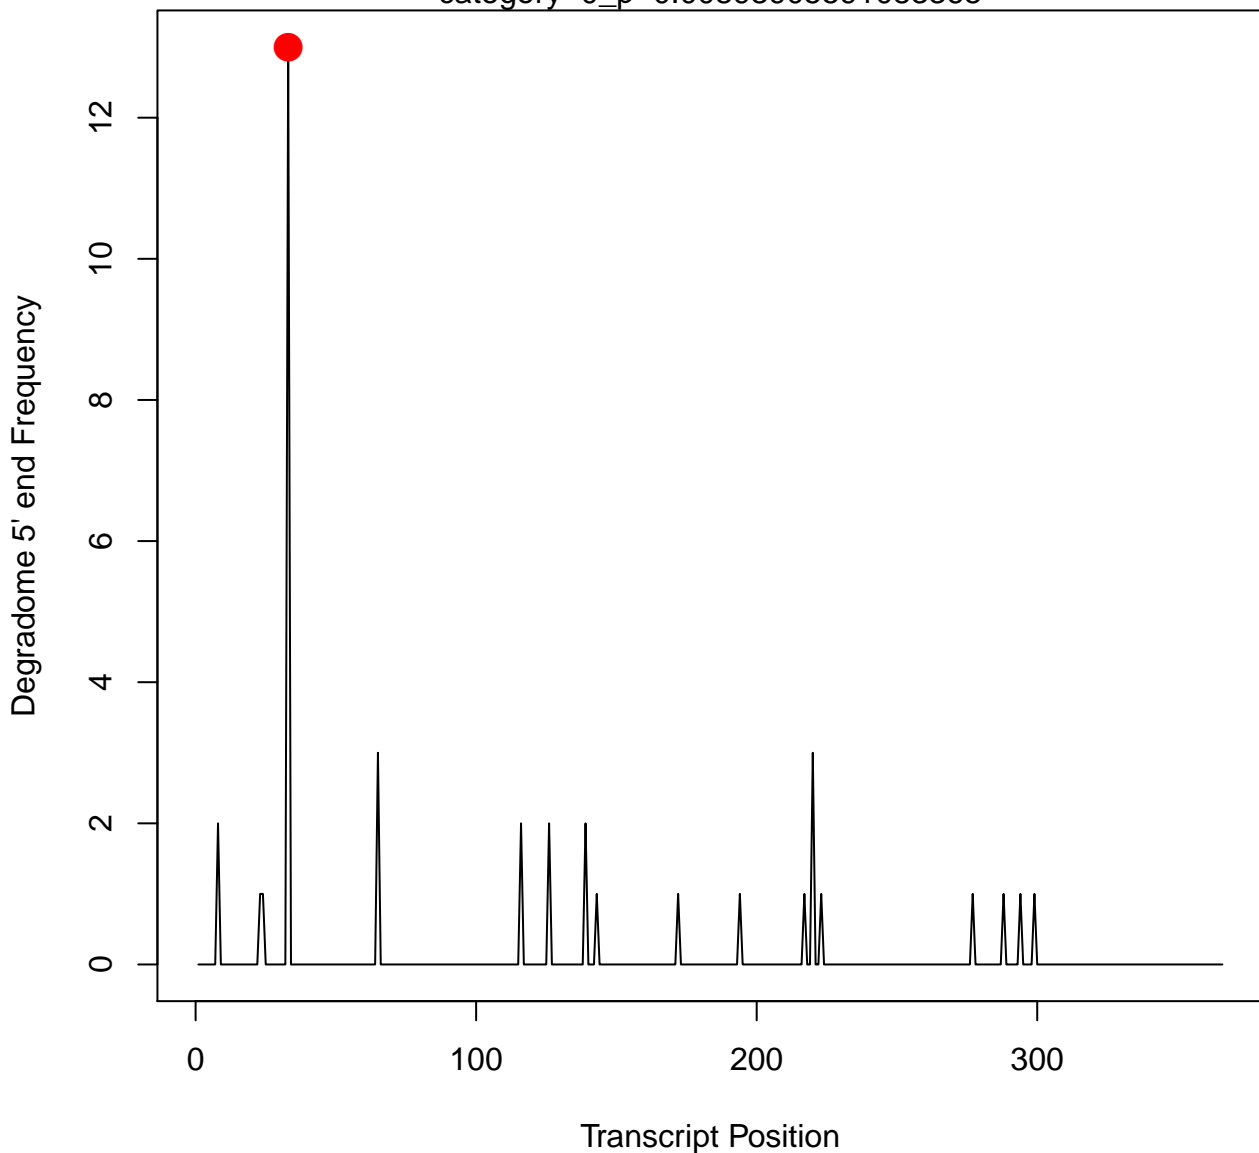

Supplement: s1 [file s1]

**T=Cluster-18410.80177\_Q=novel\_94\_S=386**

category=2\_p=0.0564267304887326

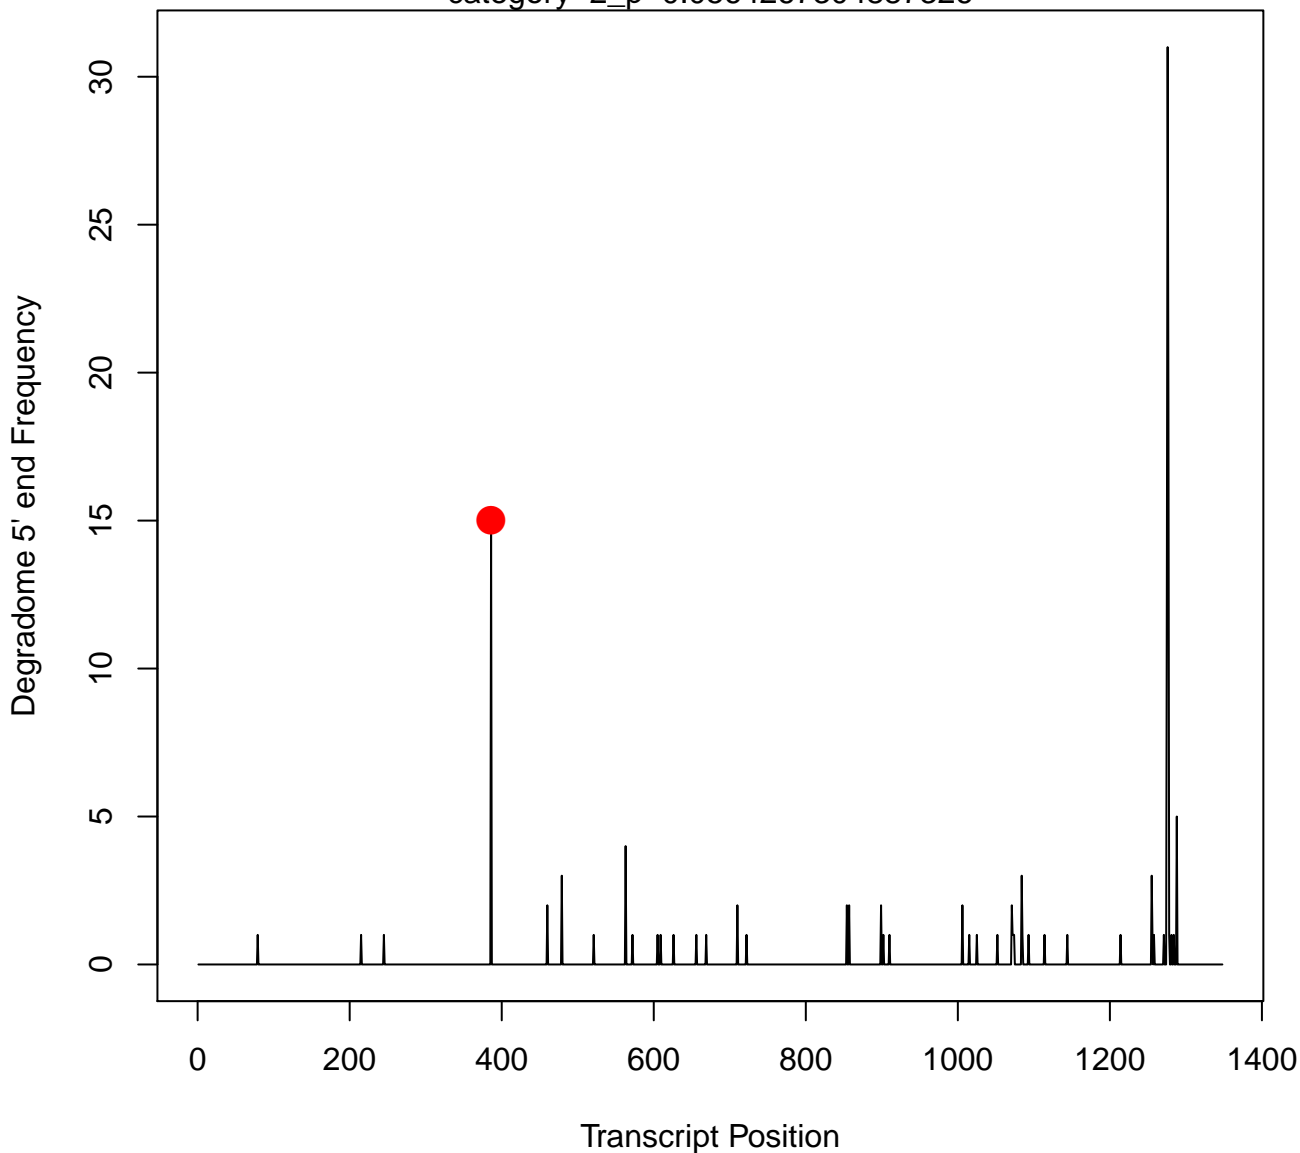

Supplement: s1 [file s1]

**T=Cluster-18410.81260\_Q=novel\_148\_S=21**

category=0\_p=0.00436846732795781

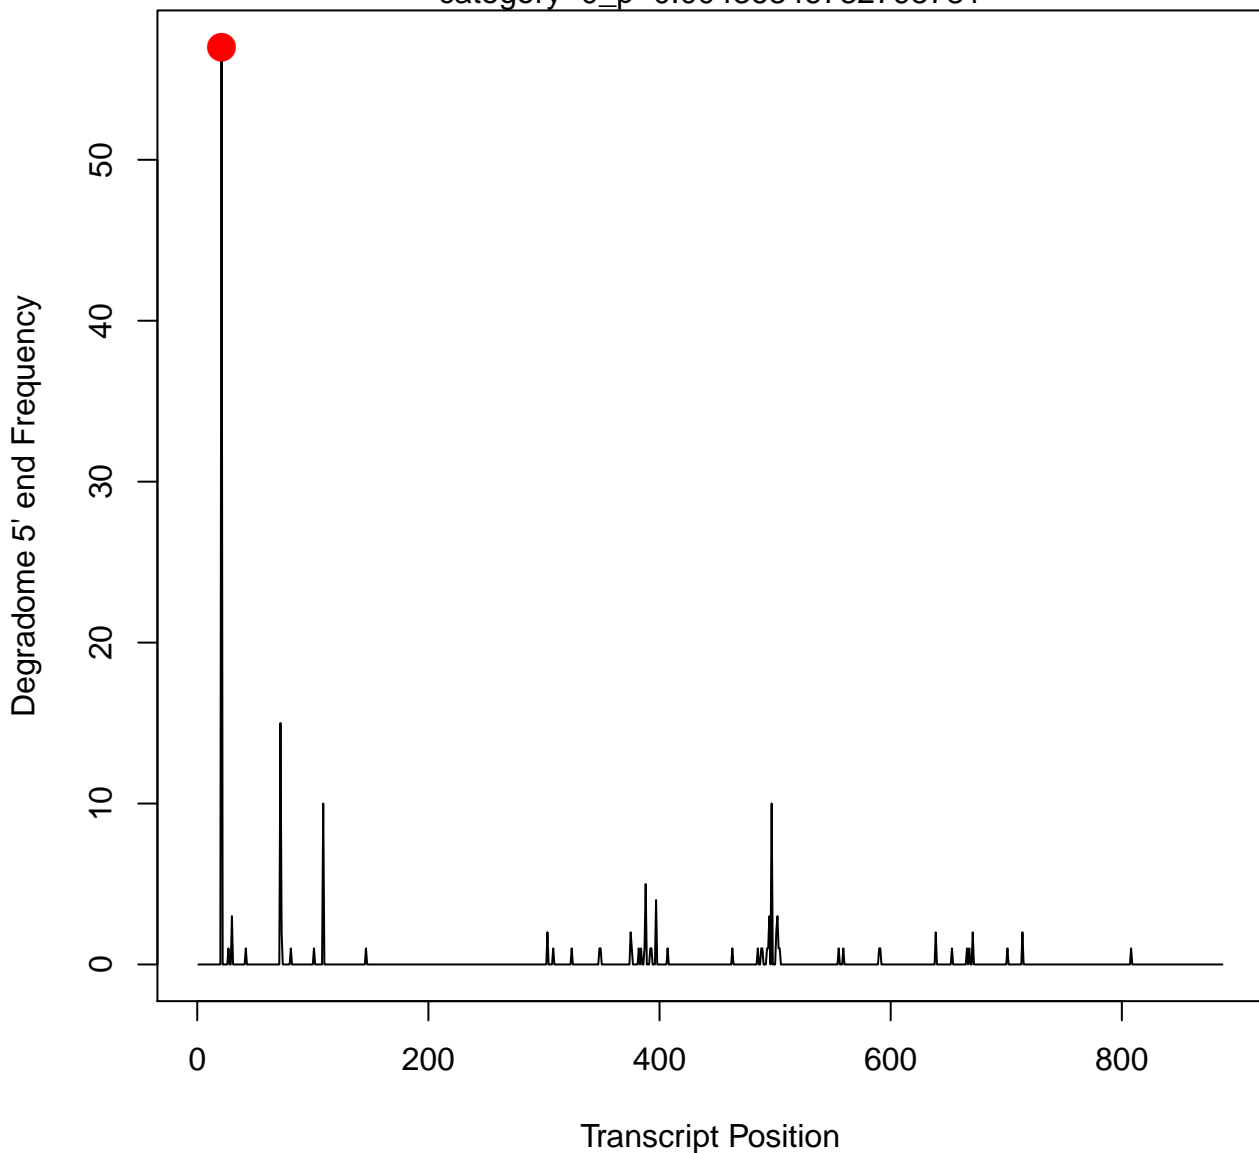

Supplement: s1 [file s1]

**T=Cluster-18410.93478\_Q=novel\_197\_S=234**

category=0\_p=0.0138580732628661

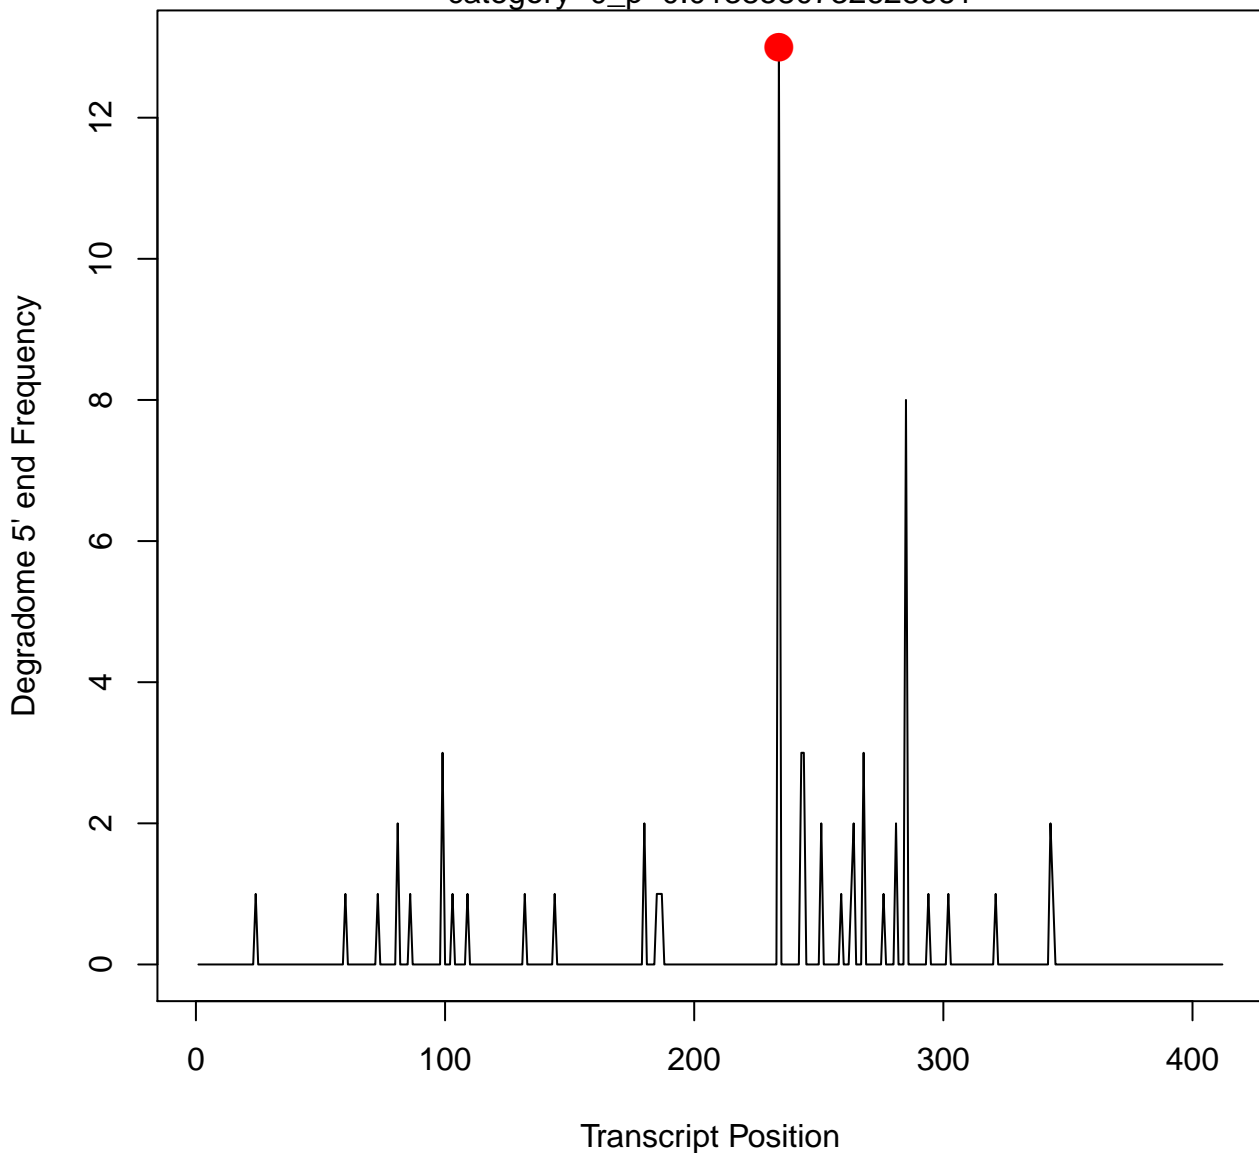

Supplement: s1 [file s1]

**T=Cluster-22726.0\_Q=pma-miR947\_S=412**

category=2\_p=0.0229647072699788

Degradome 5' end Frequency

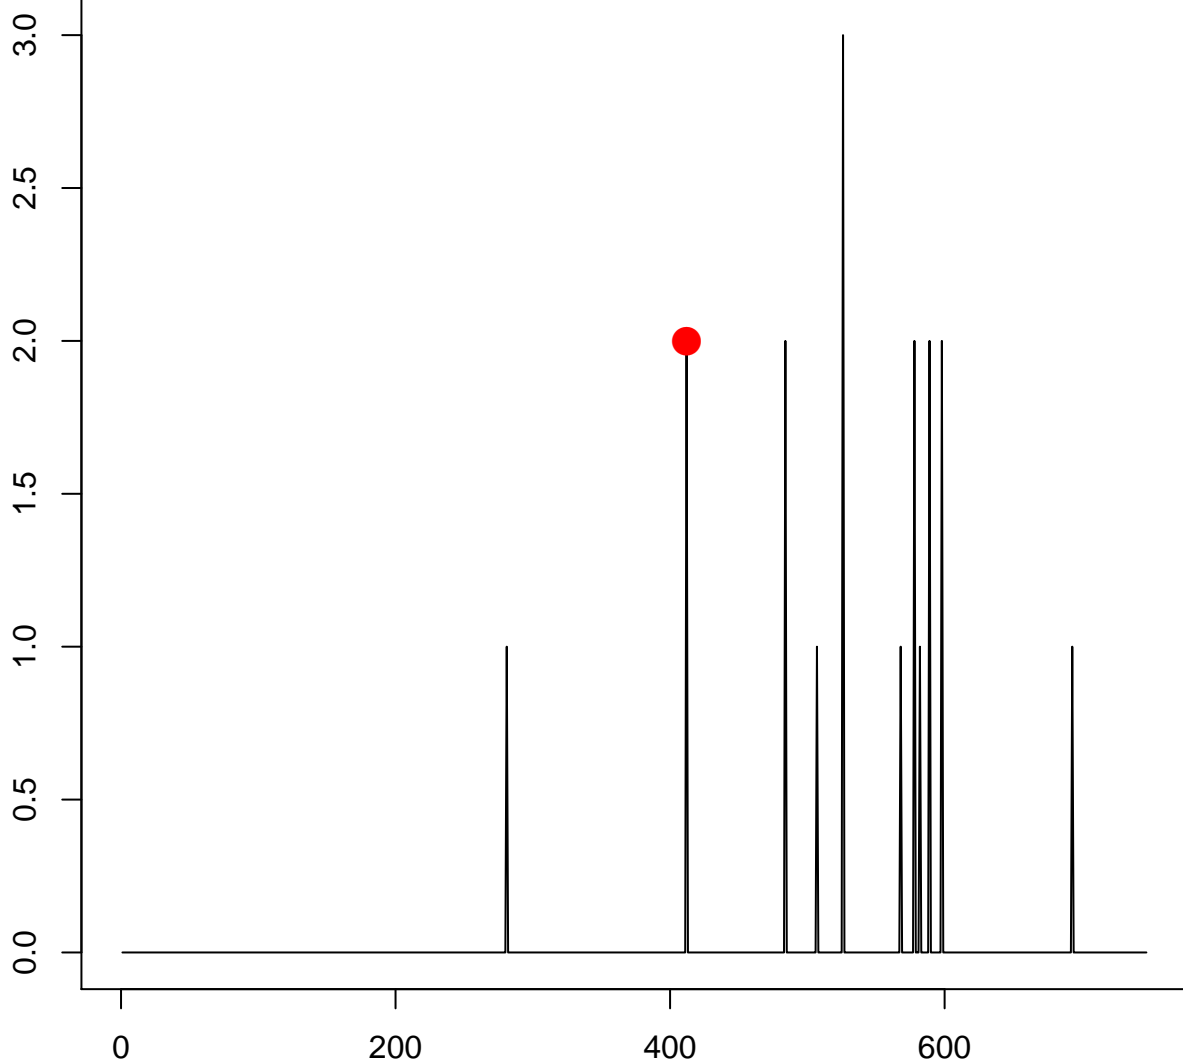

Transcript Position

Supplement: s1 [file s1]

**T=Cluster-18410.83309\_Q=novel\_8\_S=586**

category=2\_p=0.0342485307007228

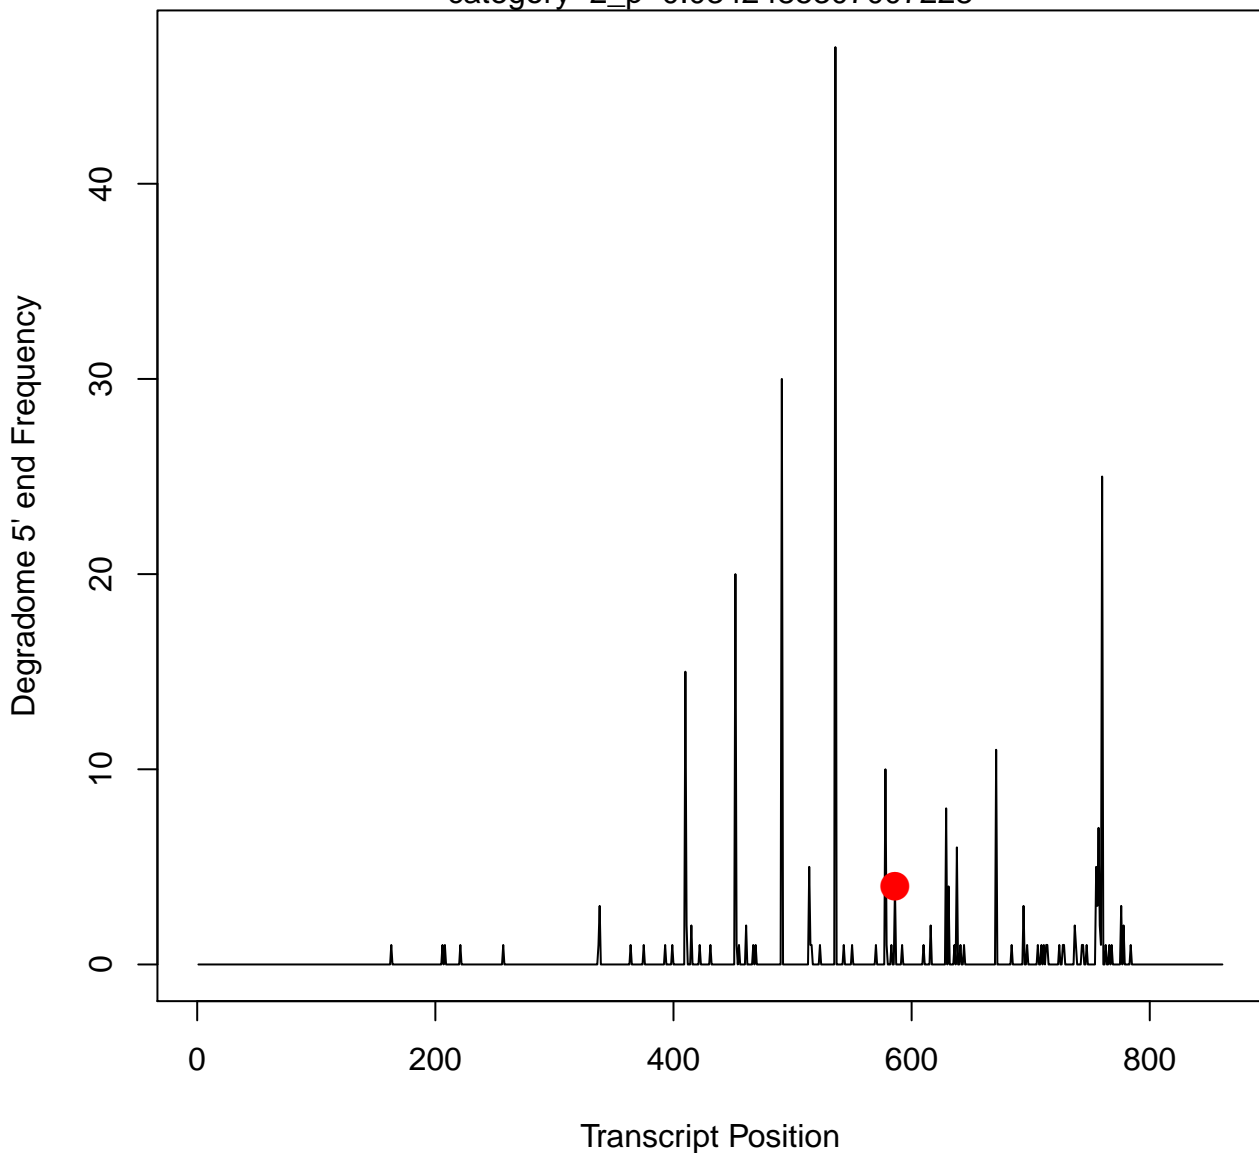

Supplement: s1 [file s1]

**T=Cluster-18410.105132\_Q=novel\_14\_S=435**

category=0\_p=0.00572969583297245

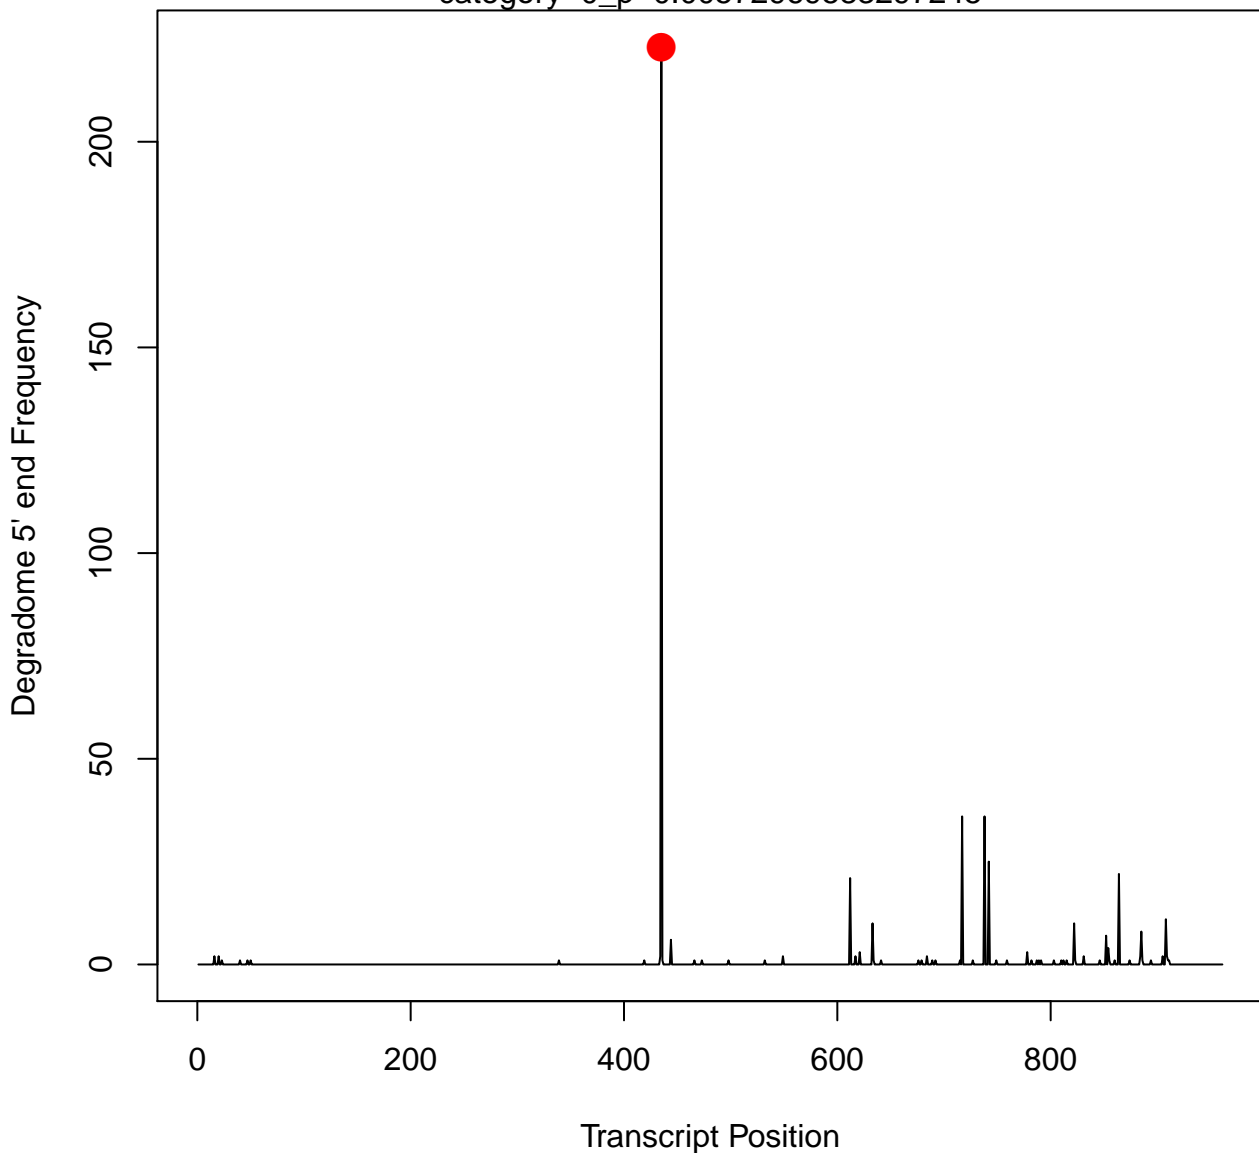

Supplement: s1 [file s1]

**T=Cluster-18410.82637\_Q=novel\_25\_S=331**

category=2\_p=0.0115490438418195

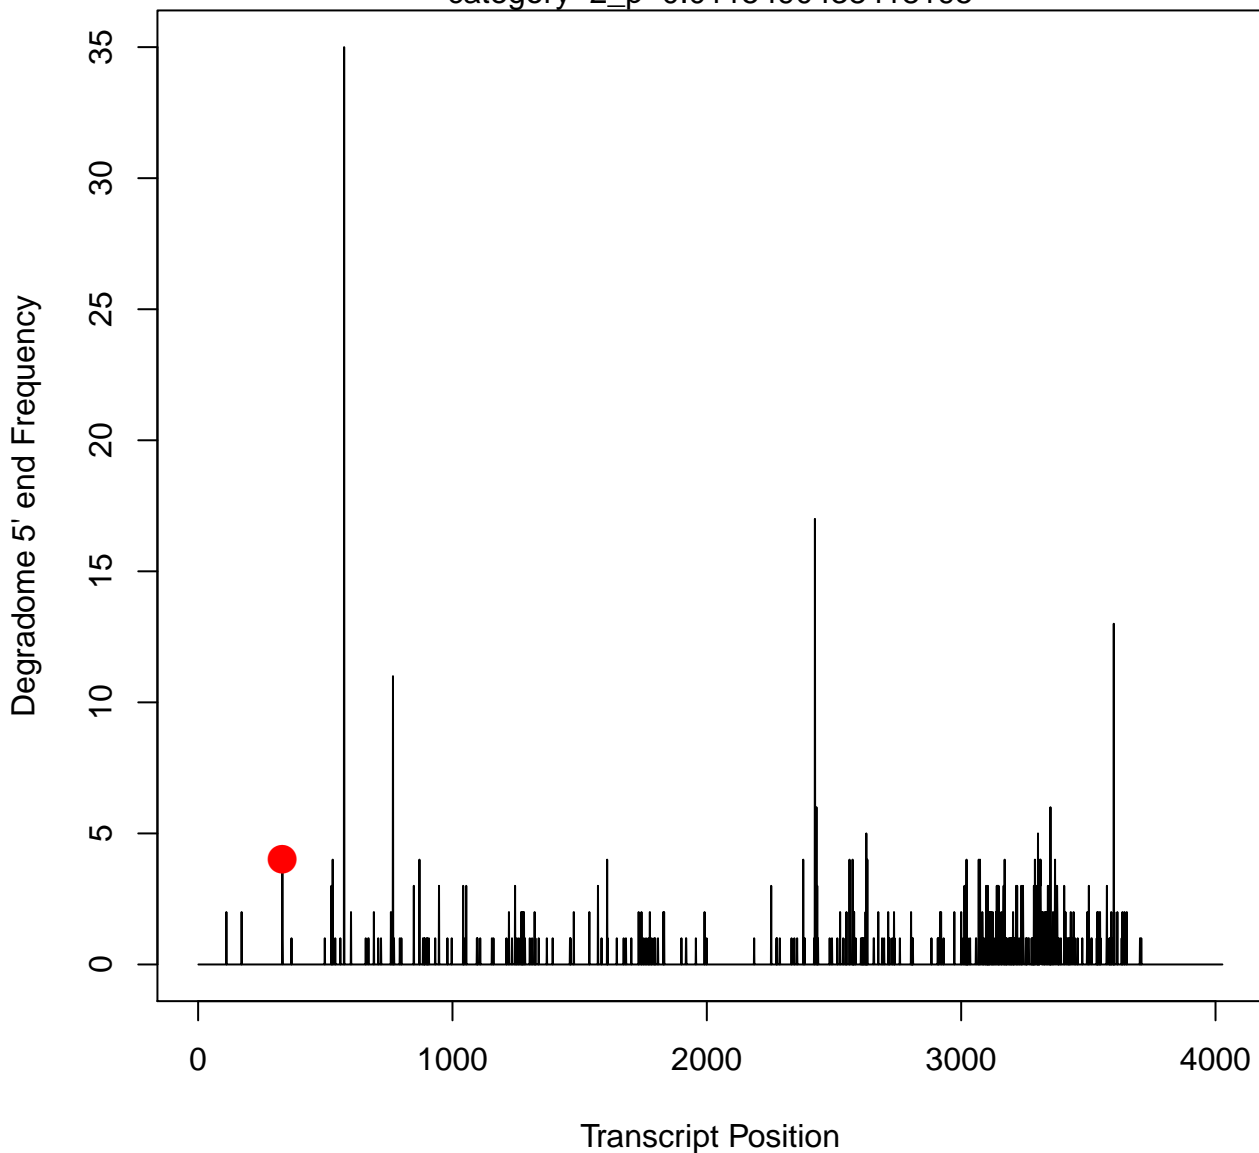

Supplement: s1 [file s1]

**T=Cluster-18410.98893\_Q=novel\_64\_S=327**

category=0\_p=0.00218662432695249

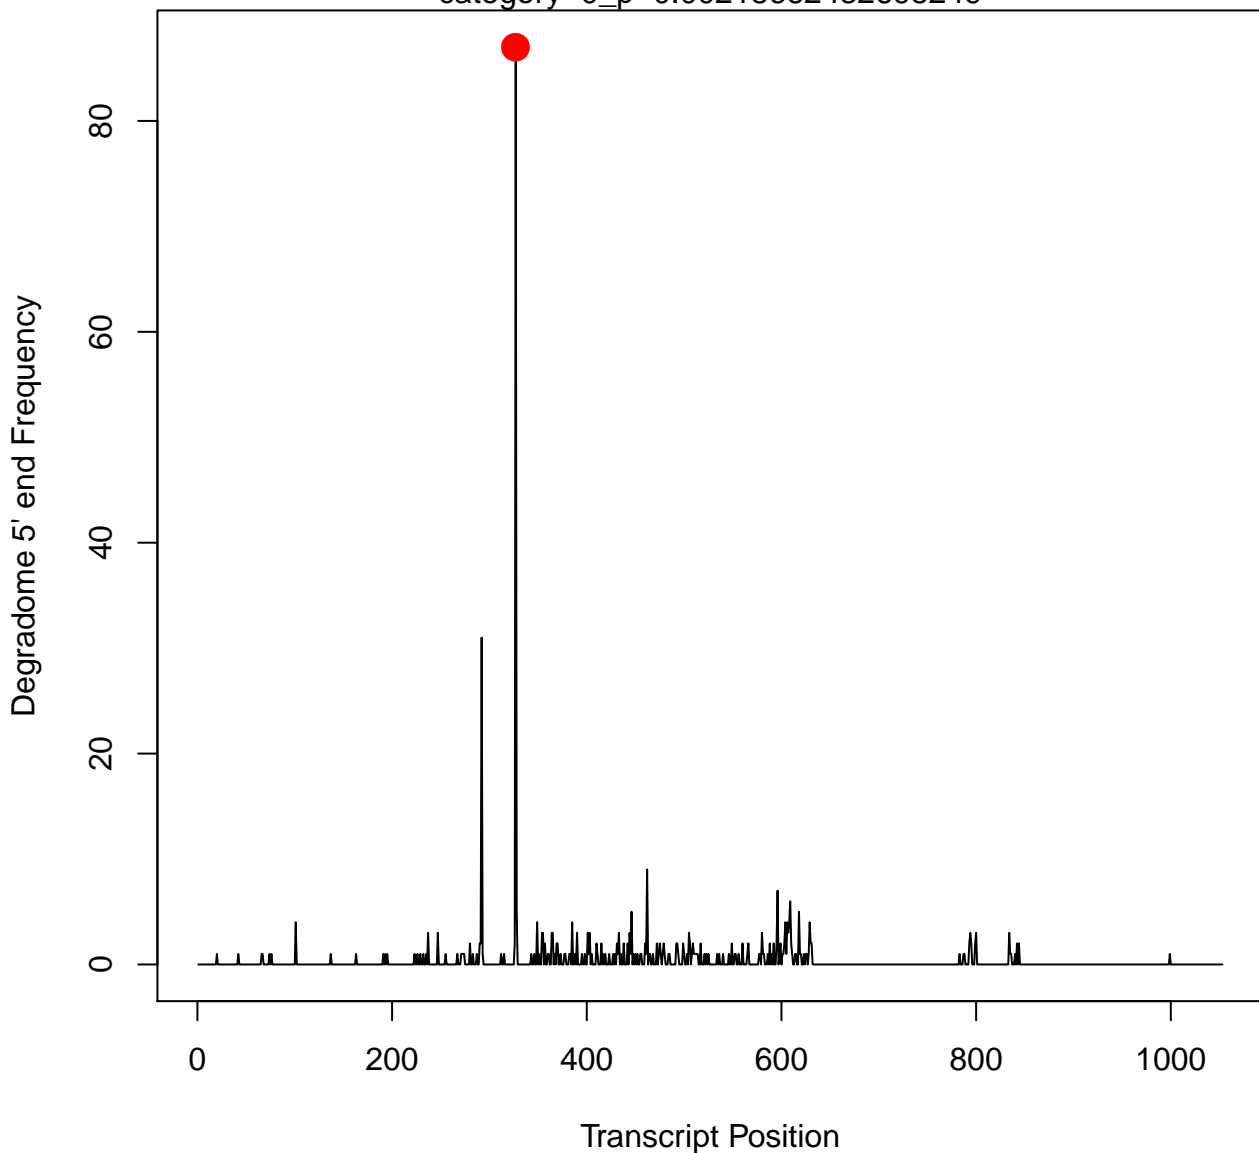

Supplement: s1 [file s1]

**T=Cluster-18410.57772\_Q=pma-miR950a\_S=954**

category=3\_p=0.0731750829532152

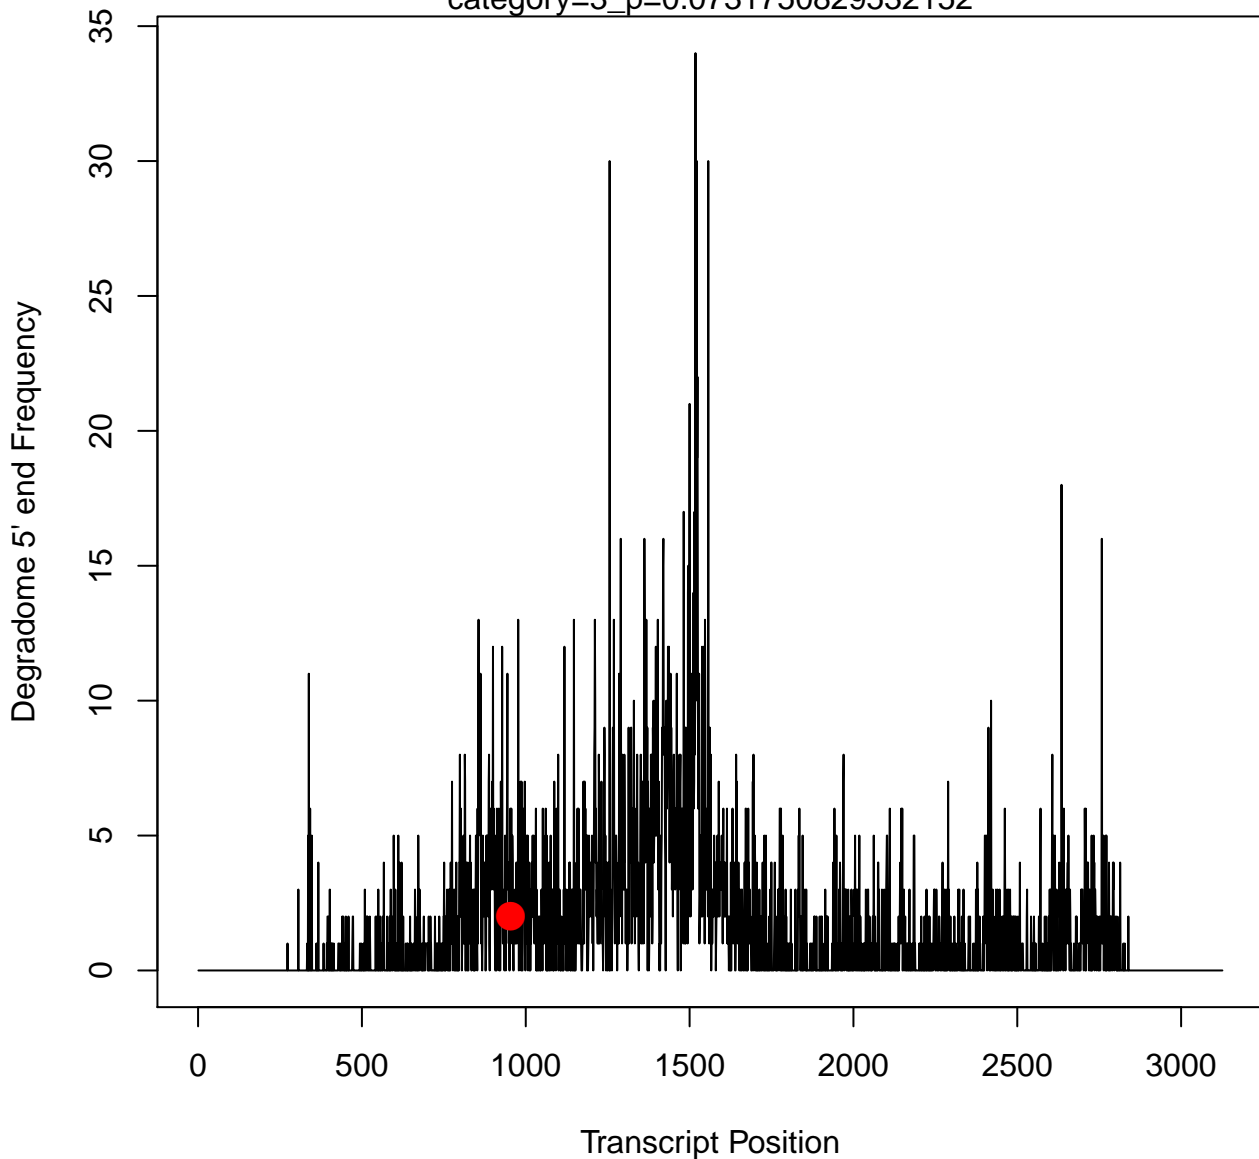

Supplement: s1 [file s1]

**T=Cluster-18410.54545\_Q=novel\_29\_S=2055**

category=0\_p=0.00572969583297245

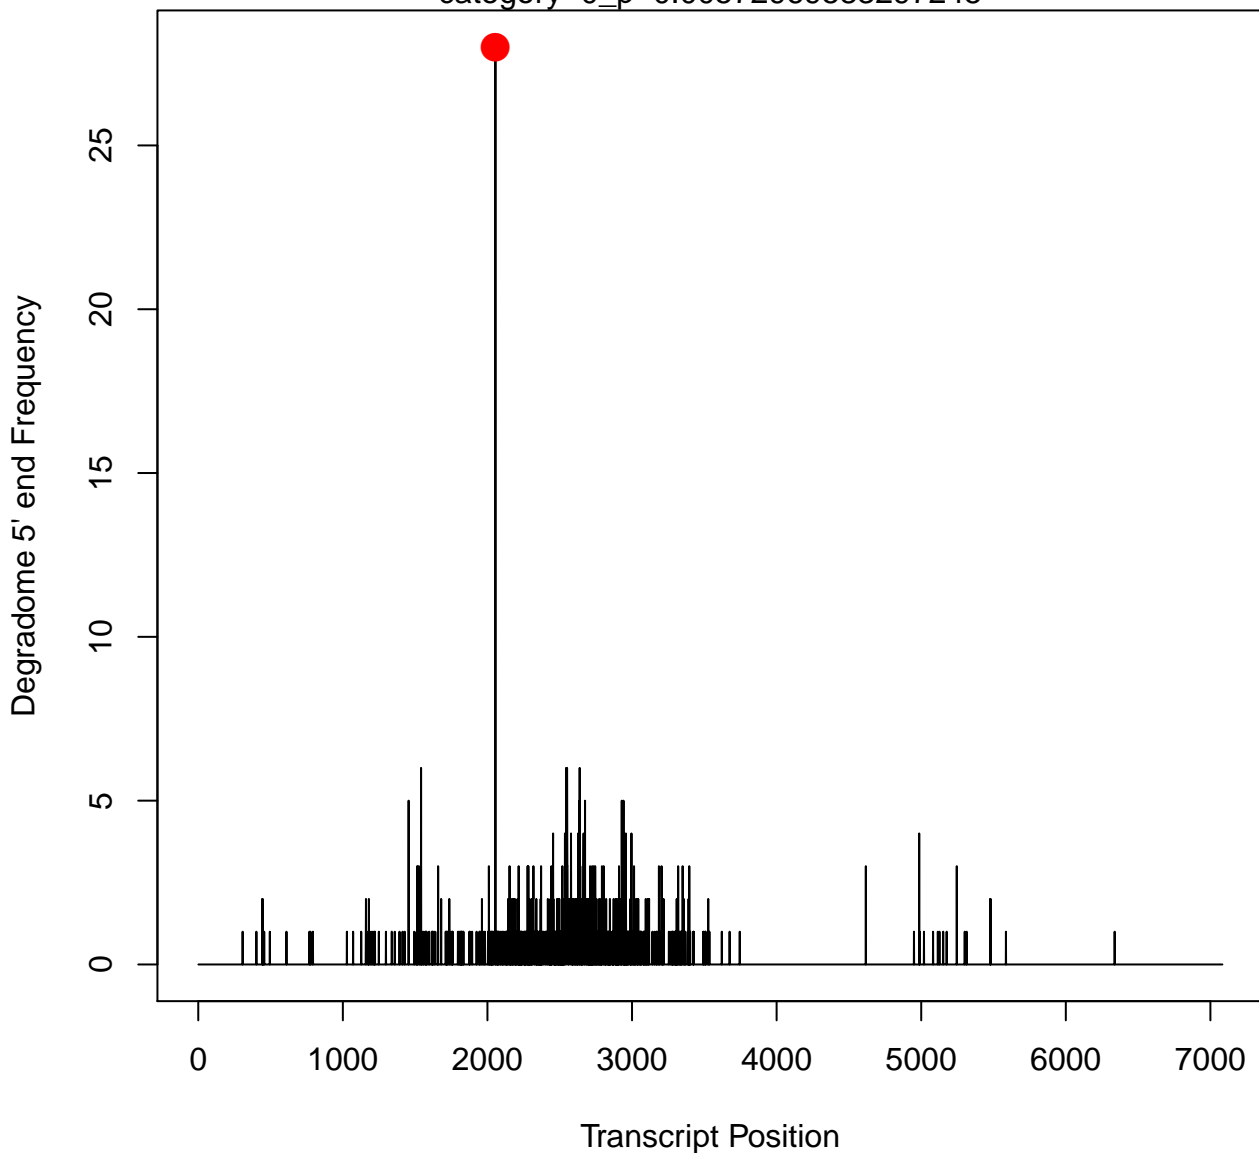

Supplement: s1 [file s1]

**T=Cluster-18410.65914\_Q=novel\_195\_S=1744**

category=0\_p=0.0141278717118409

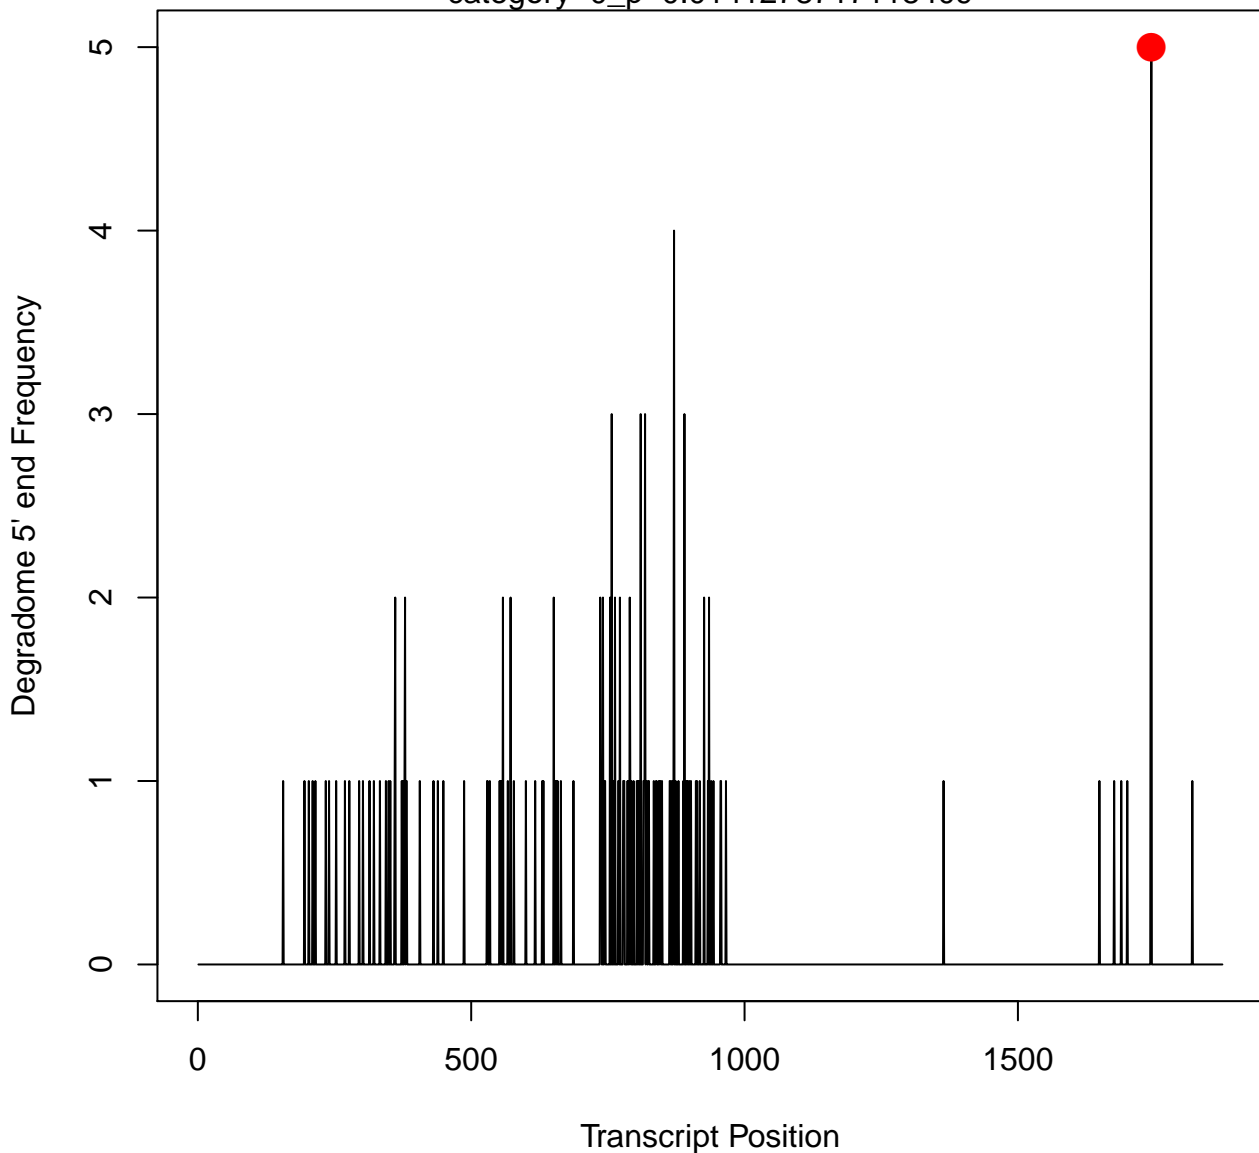

Supplement: s1 [file s1]

**T=Cluster-20177.1\_Q=novel\_14\_S=1475**

category=2\_p=0.0564267304887326

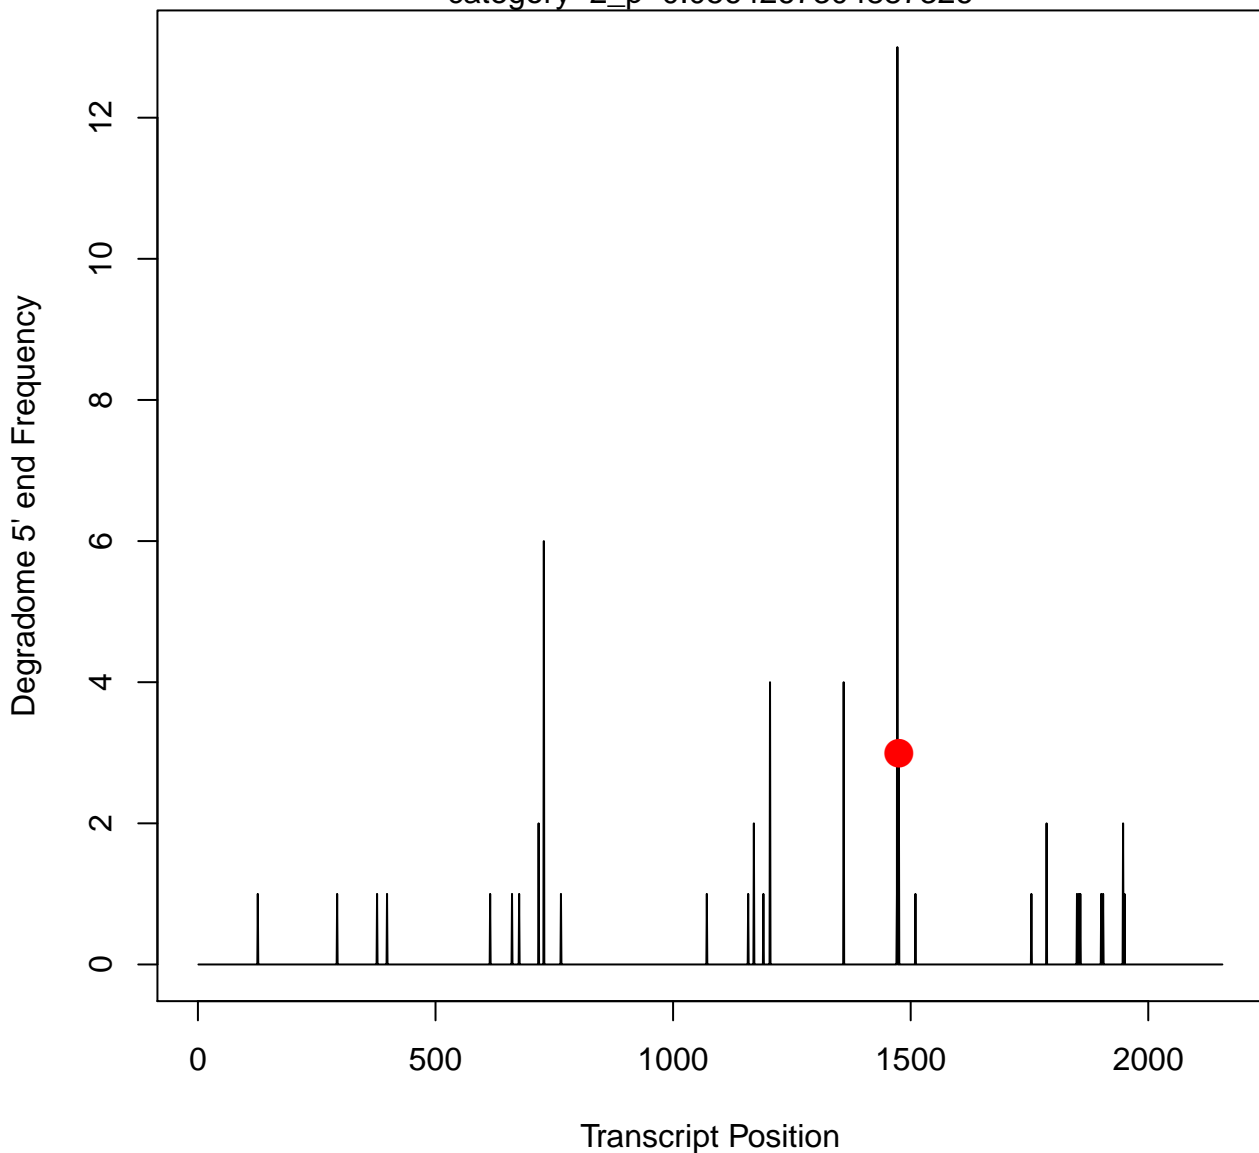

Supplement: s1 [file s1]

**T=Cluster-18410.82362\_Q=novel\_42\_S=298**

category=0\_p=0.005185427902343

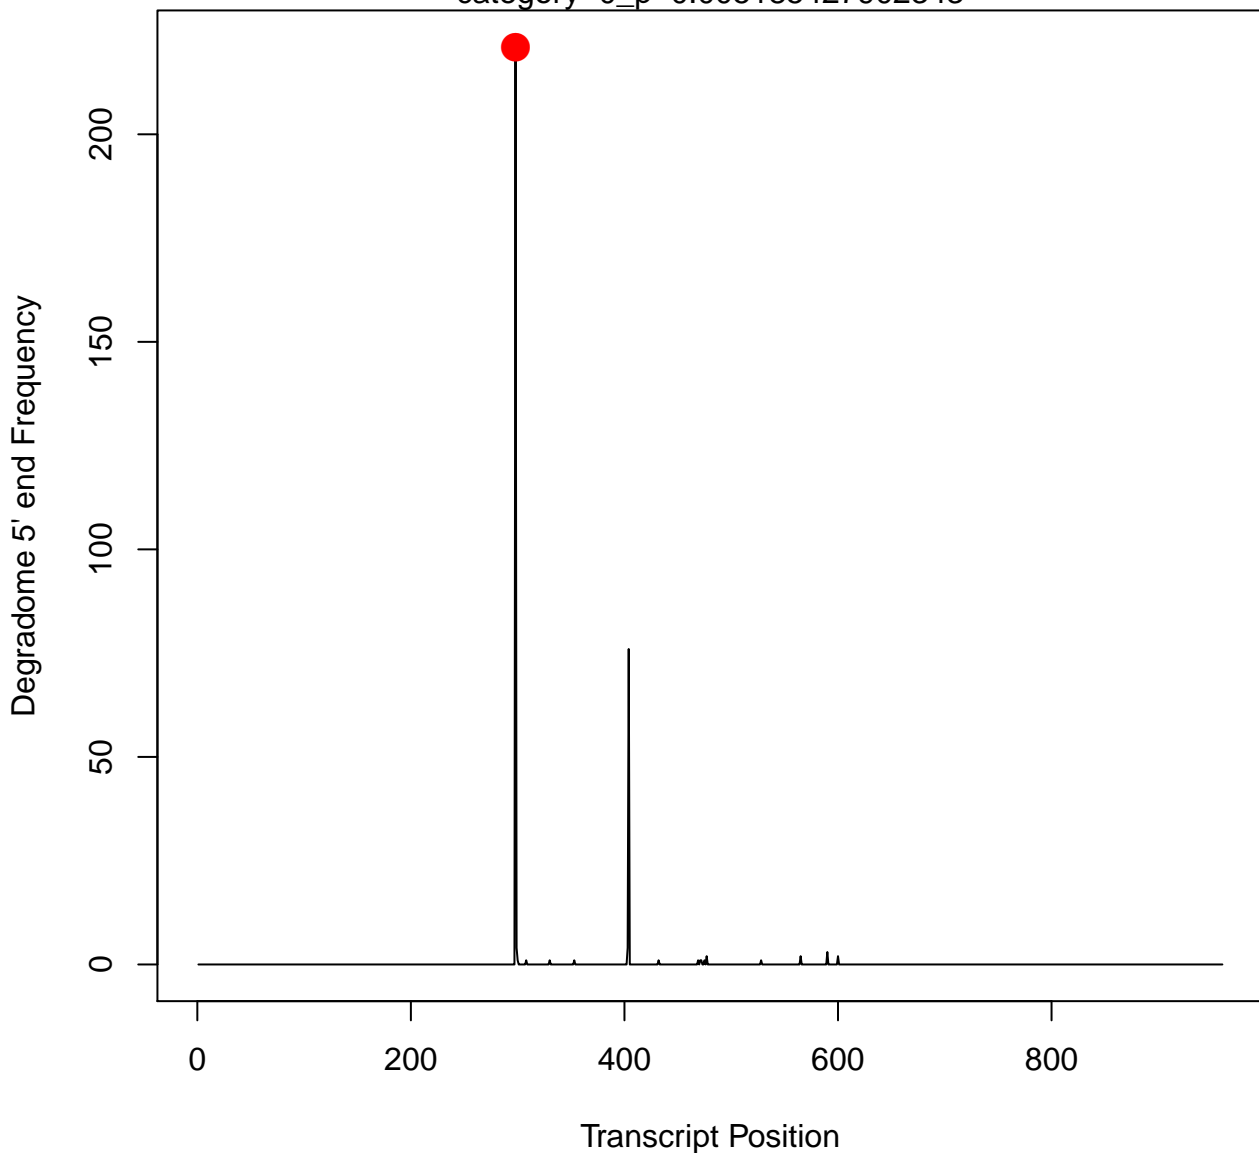

Supplement: s1 [file s1]

**T=Cluster-18410.49230\_Q=novel\_148\_S=186**

category=0\_p=0.0430977137009262

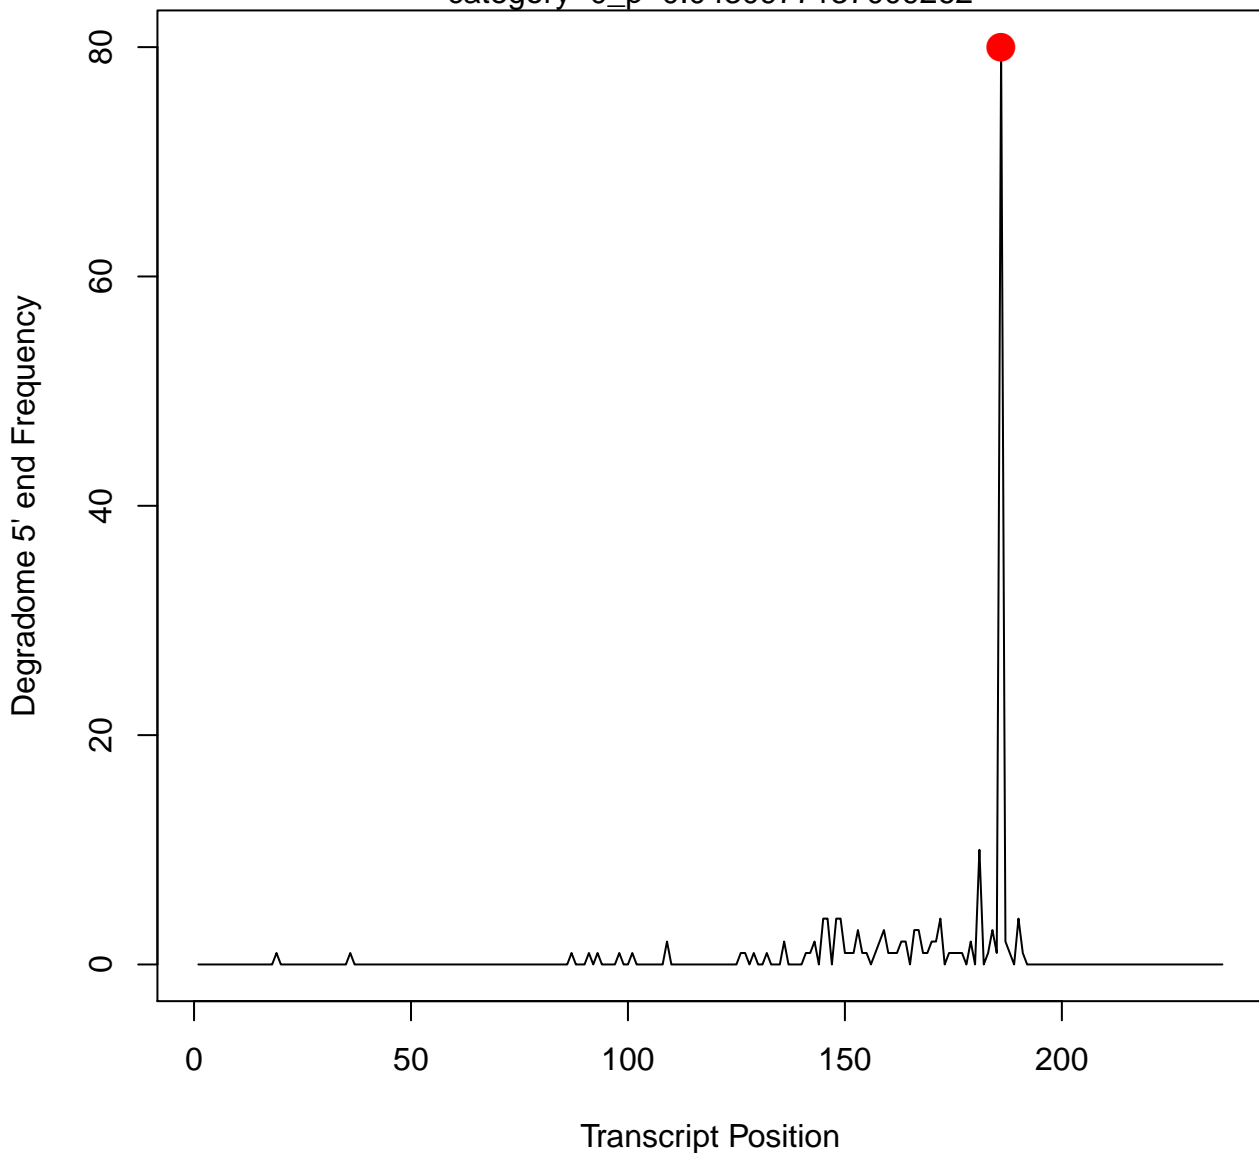

Supplement: s1 [file s1]

**T=Cluster-18410.65256\_Q=pma-miR166a\_S=69**

category=2\_p=0.0229647072699788

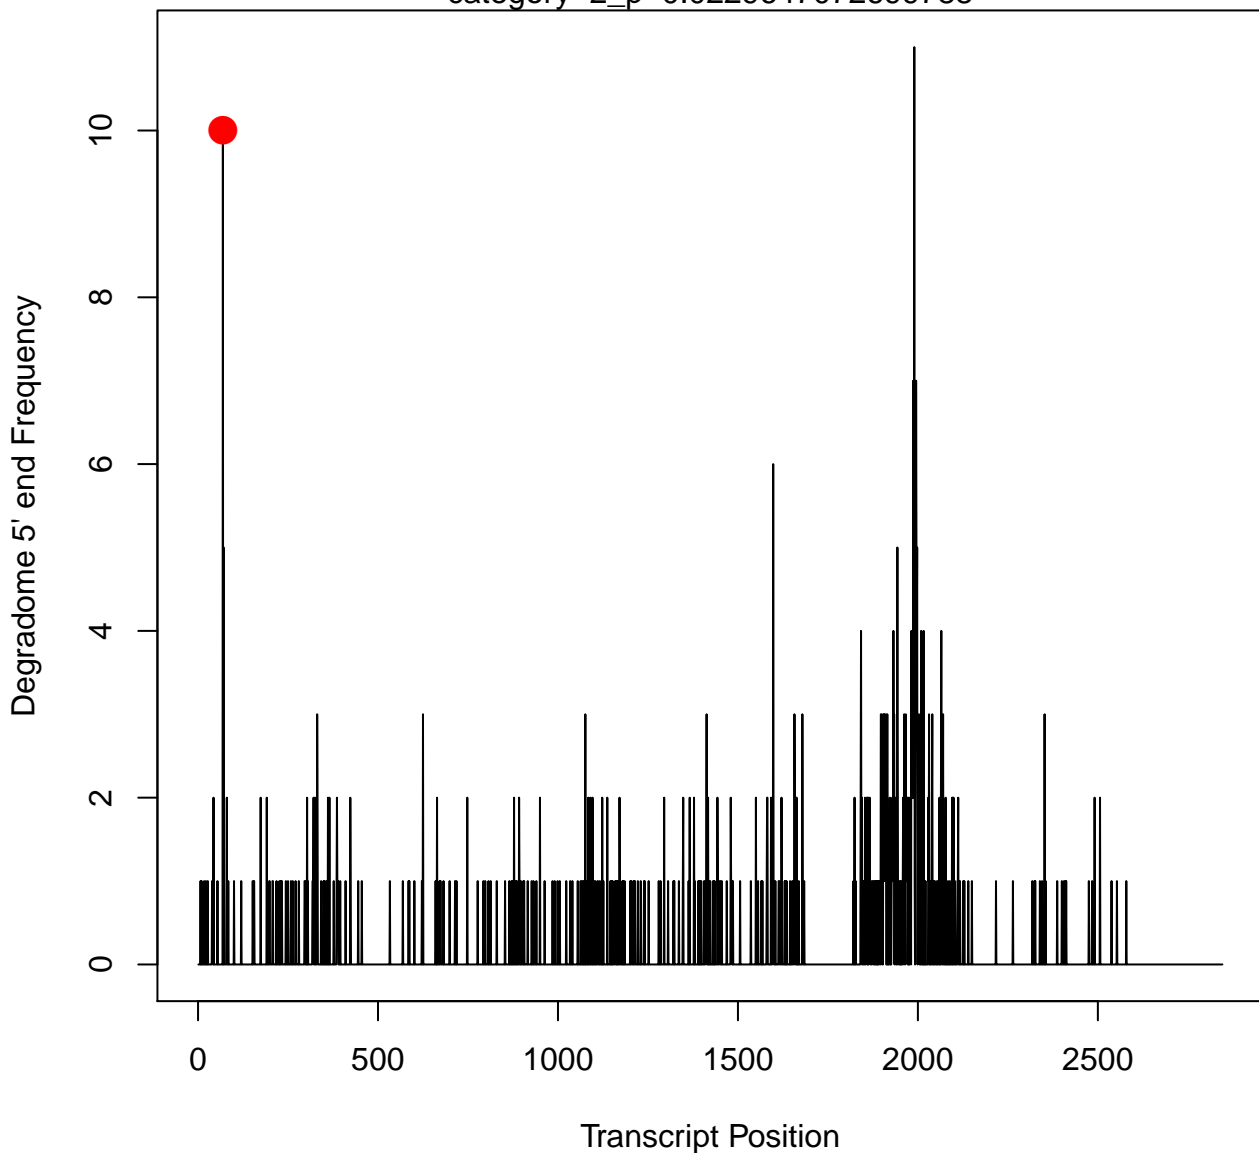

Supplement: s1 [file s1]

**T=Cluster-13870.0\_Q=pma-miR1311\_S=15**

category=0\_p=0.00327814283922701

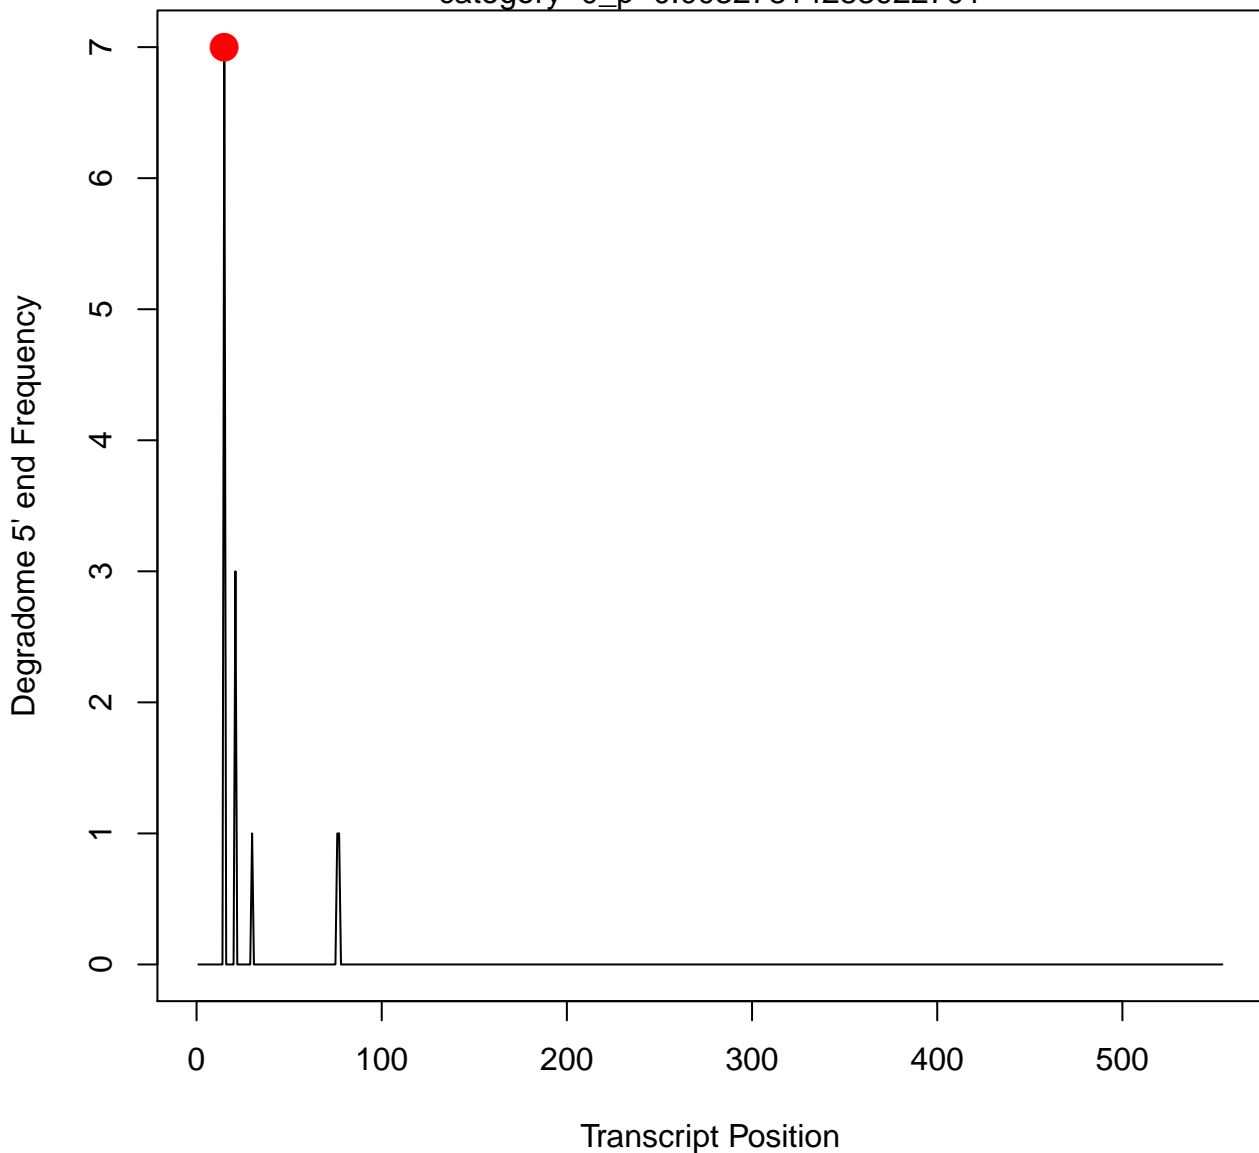

Supplement: s1 [file s1]

**T=Cluster-18410.34649\_Q=pma-miR319\_S=115**

category=0\_p=0.0103439671421557

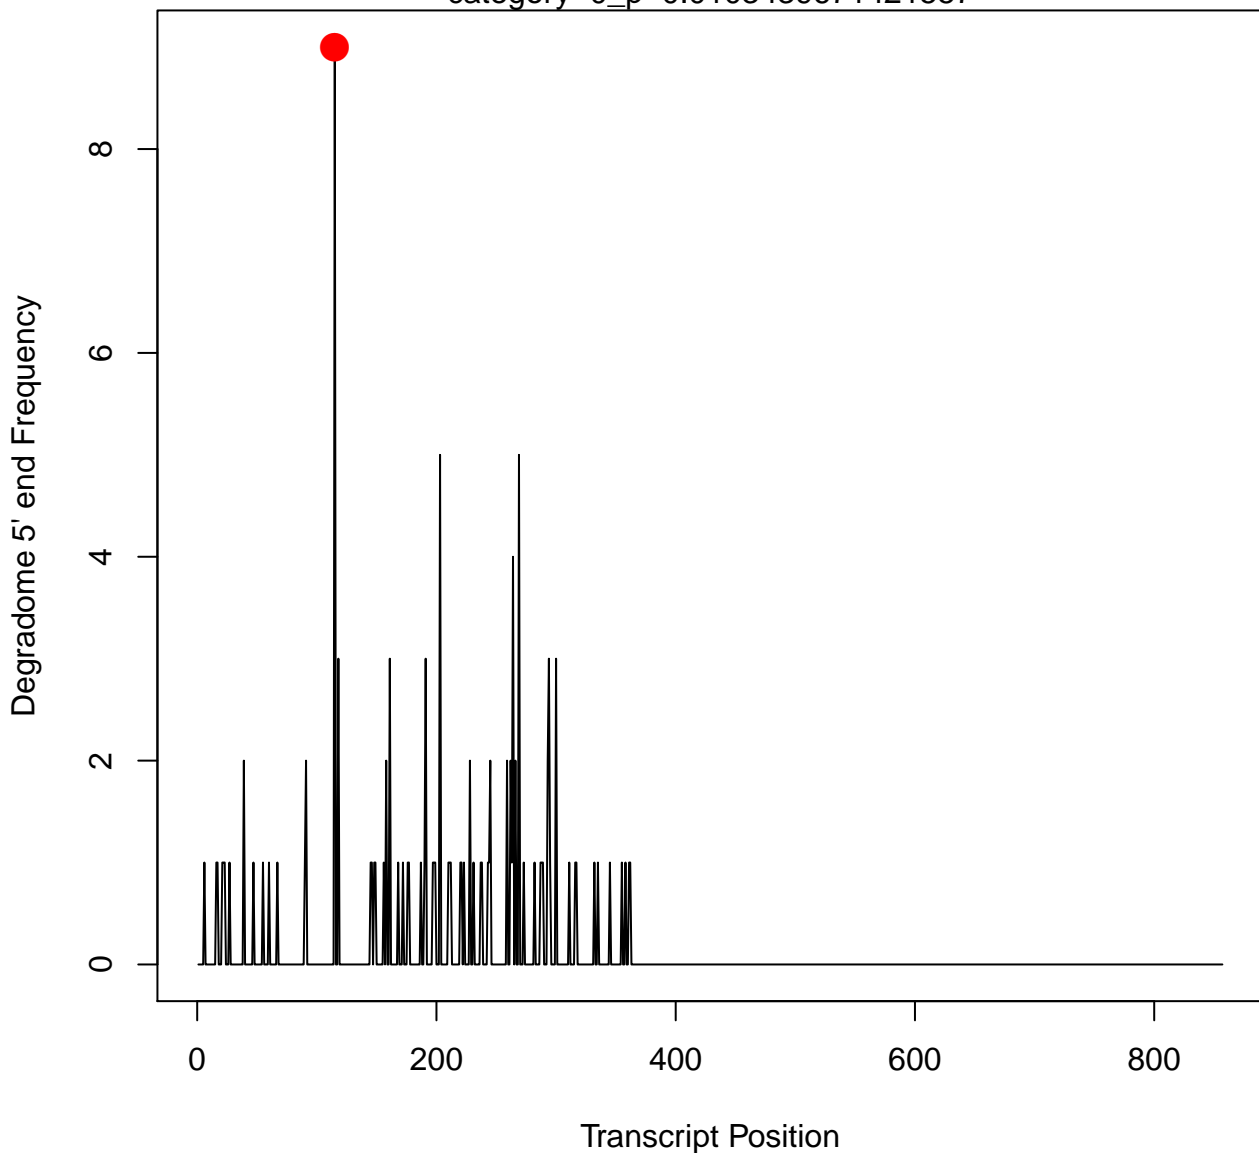

Supplement: s1 [file s1]

**T=Cluster-18410.6279\_Q=novel\_25\_S=265**

category=0\_p=0.00654553945797942

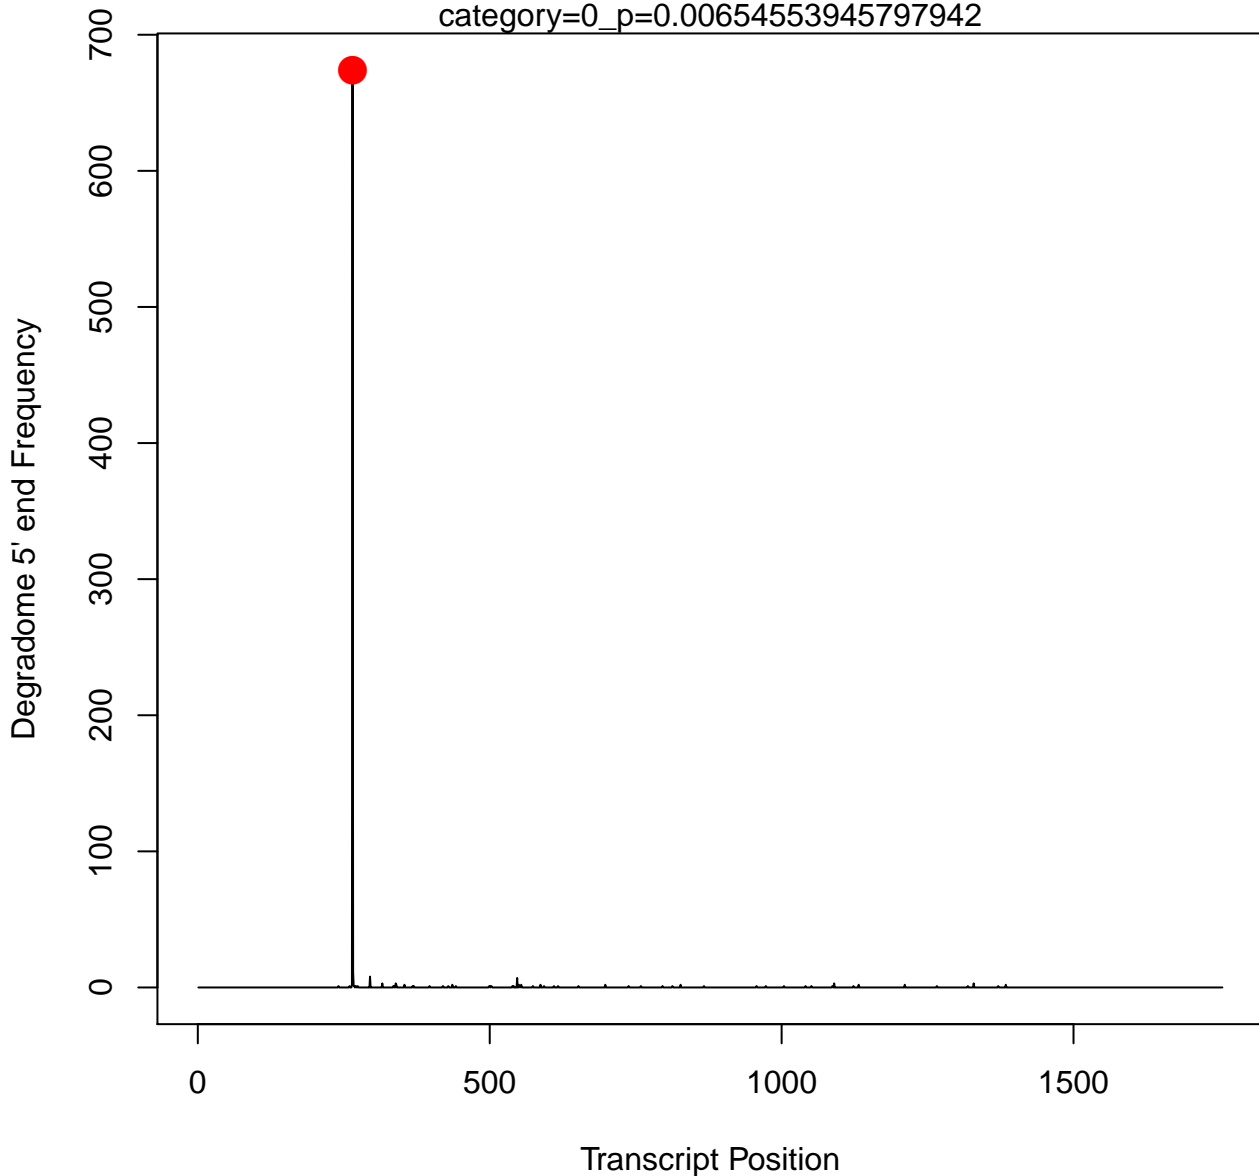

Supplement: s1 [file s1]

**T=Cluster-18410.76480\_Q=novel\_21\_S=3244**

category=2\_p=0.0673240995462872

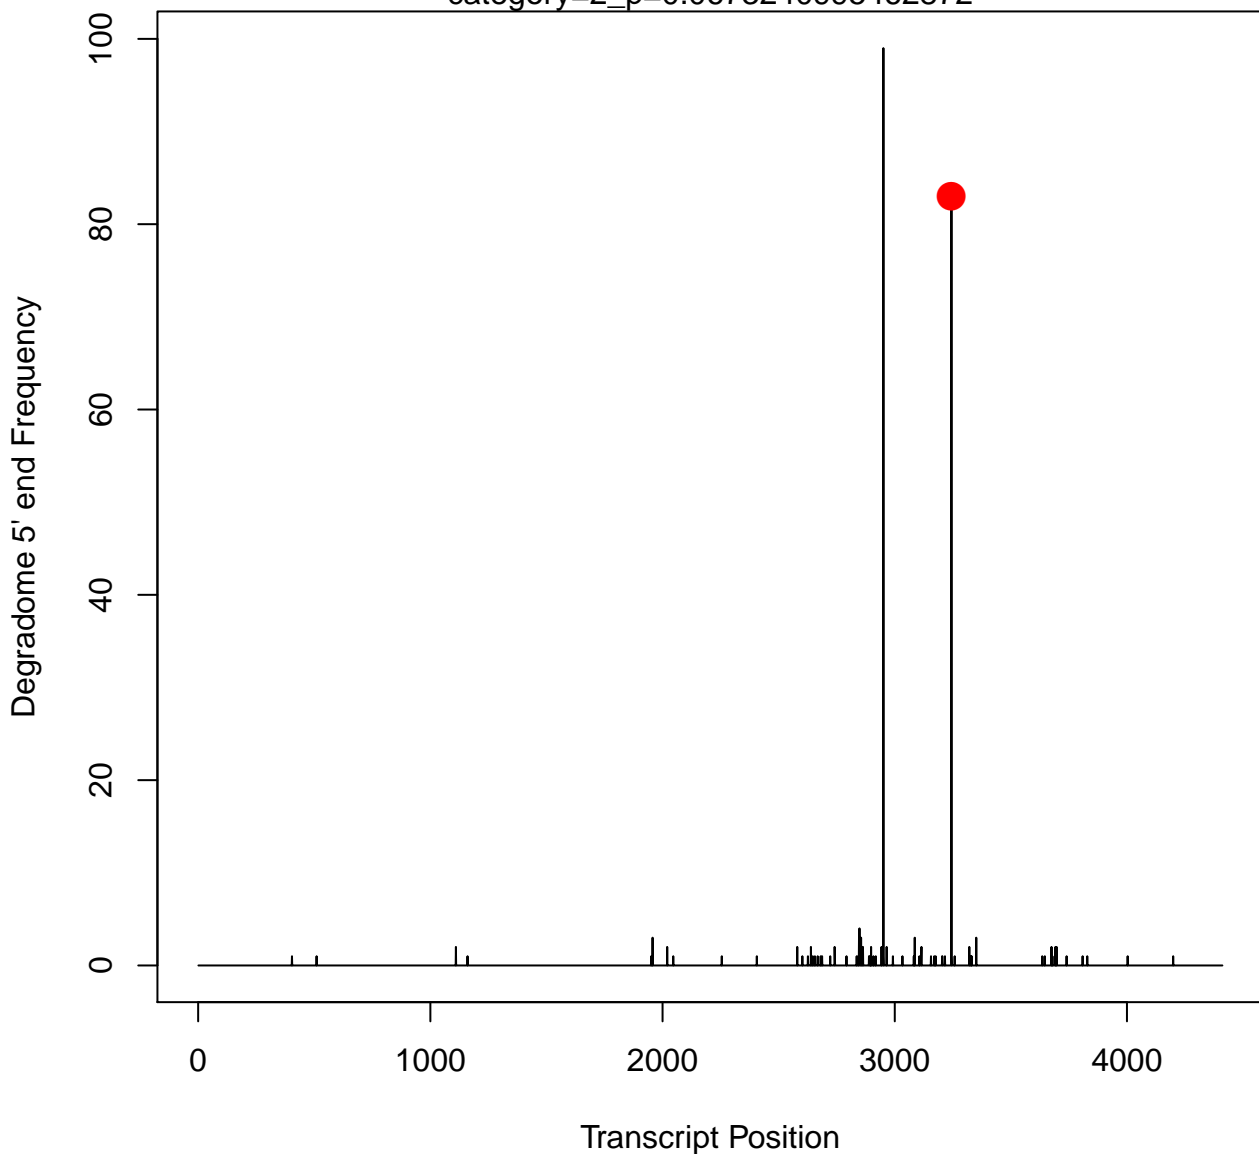

Supplement: s1 [file s1]

**T=Cluster-18410.1716\_Q=novel\_47\_S=67**

category=0\_p=0.0275241003311731

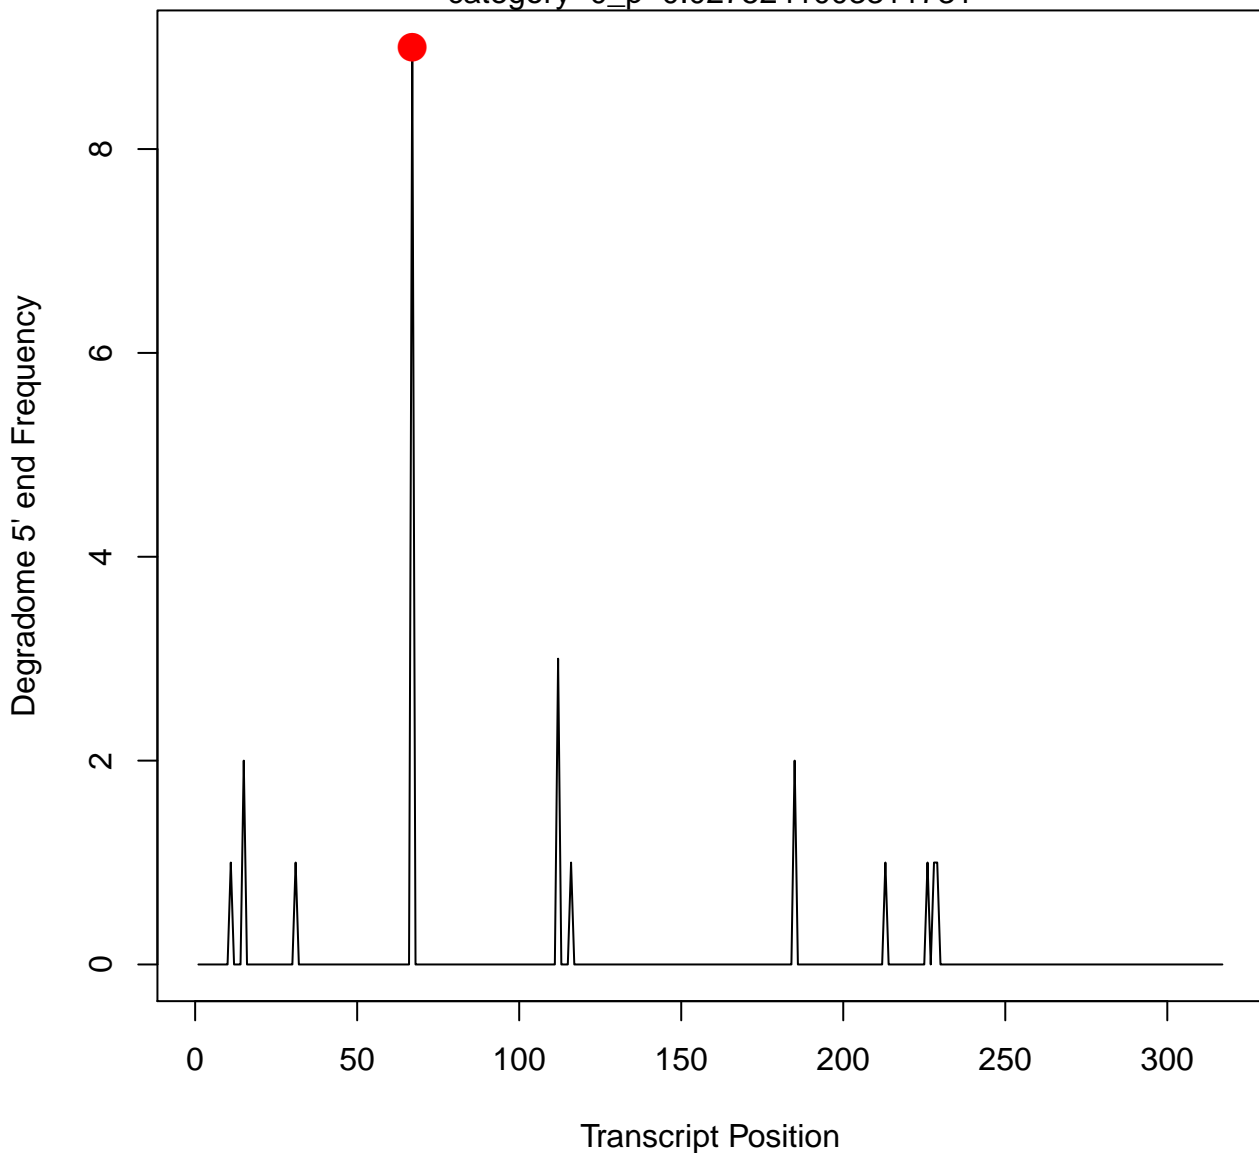

Supplement: s1 [file s1]

**T=Cluster-18410.82862\_Q=novel\_35\_S=497**

category=0\_p=0.0985085769938396

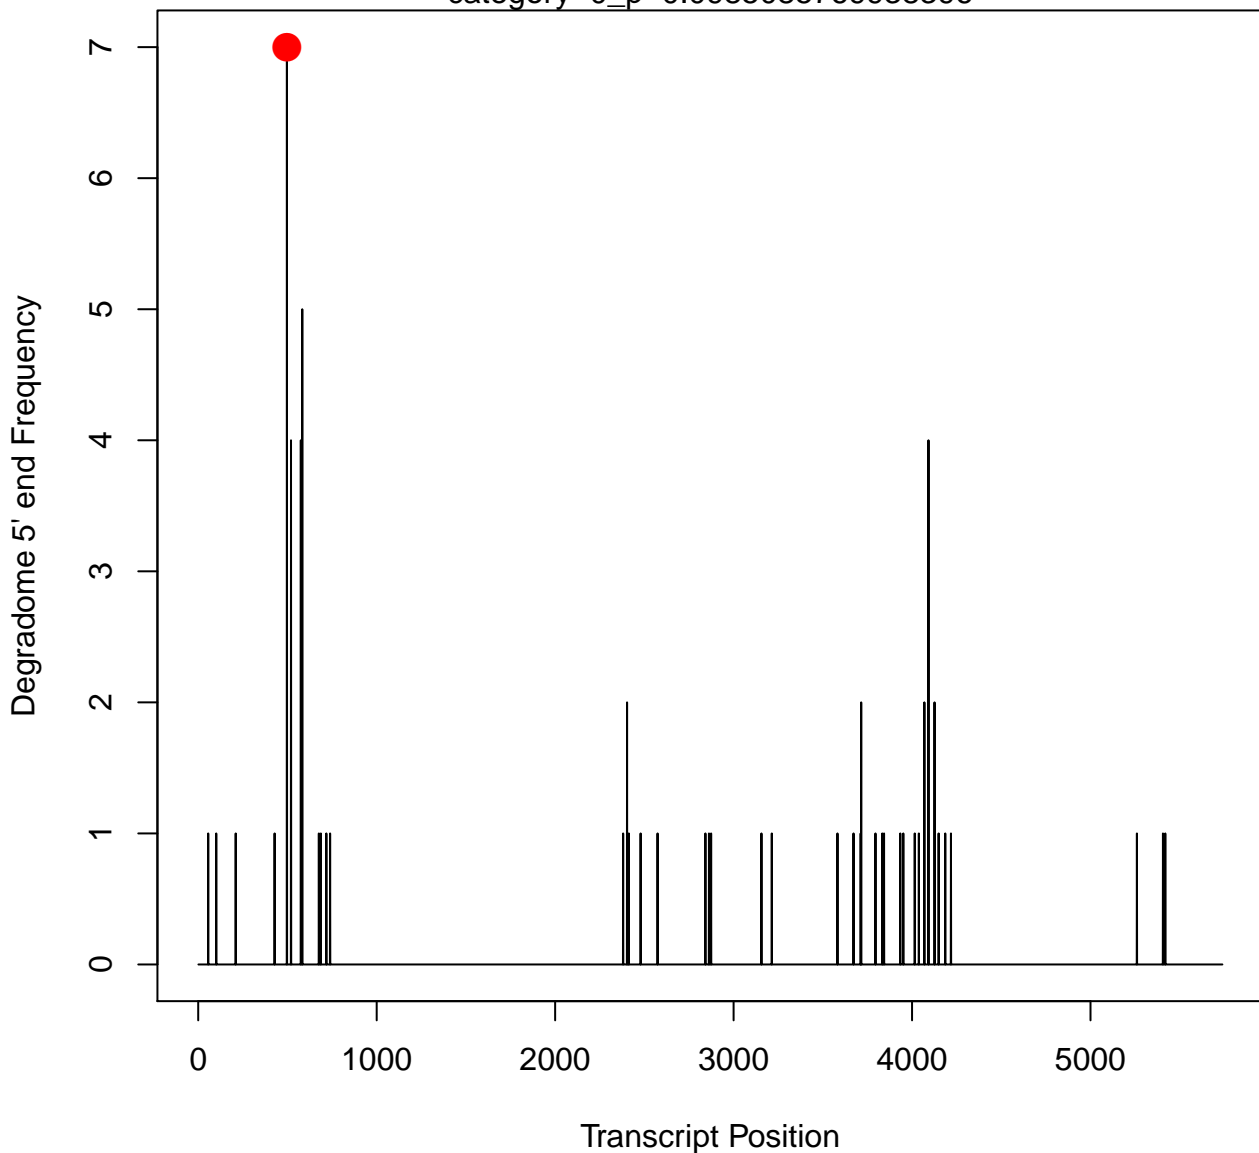

Supplement: s1 [file s1]

**T=Cluster-18410.70358\_Q=novel\_29\_S=2476**

category=0\_p=0.00545759909929999

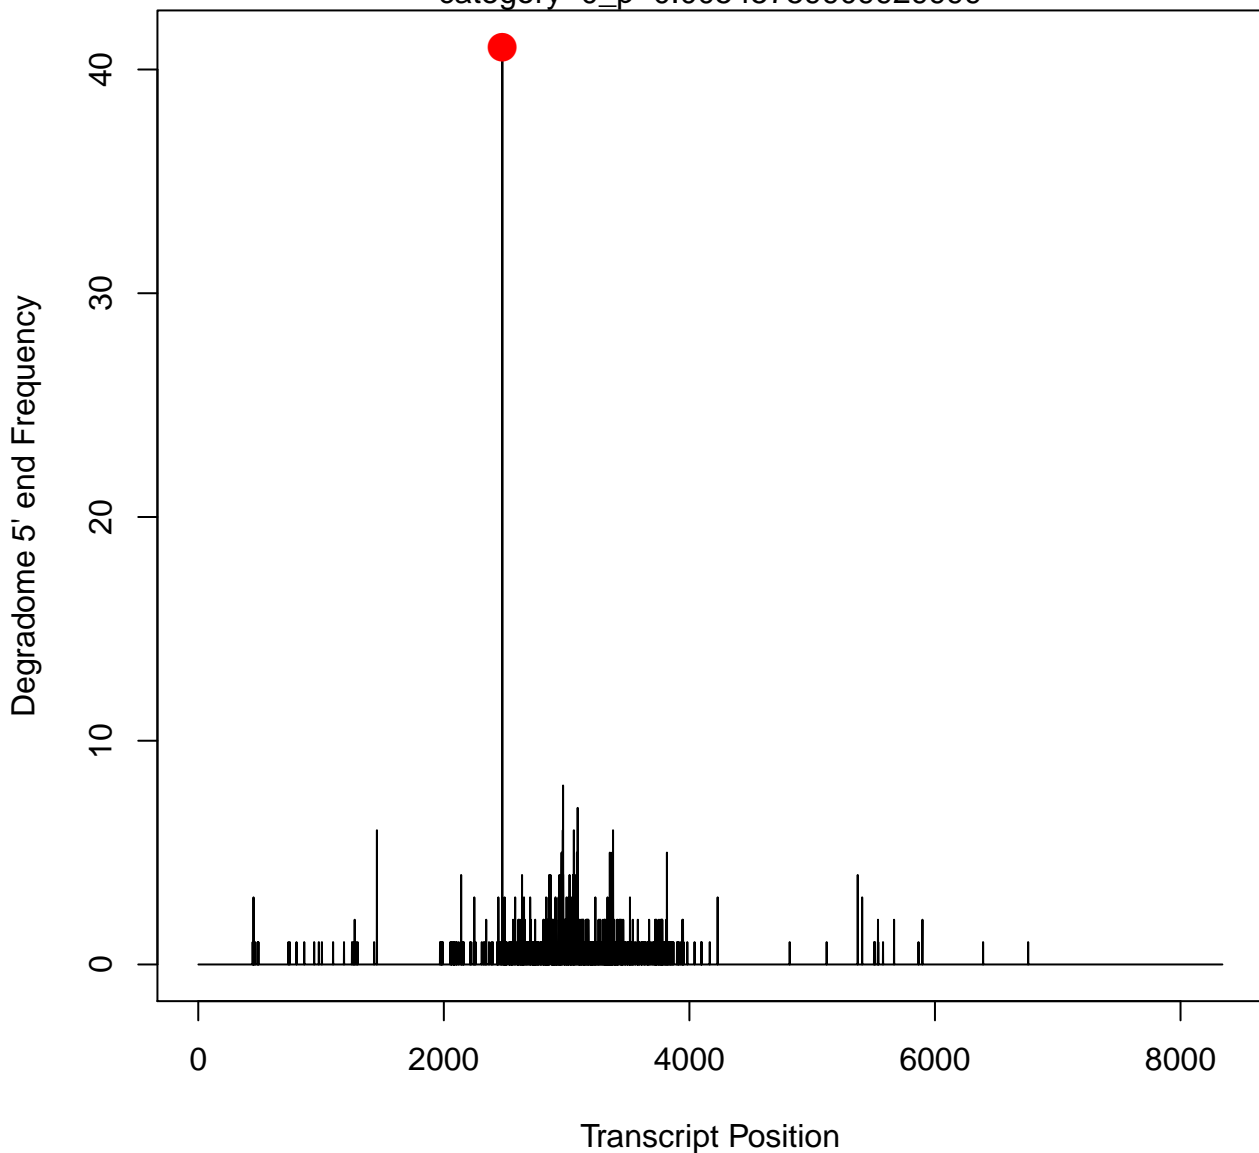

Supplement: s1 [file s1]

**T=Cluster-18410.62143\_Q=novel\_92\_S=1490**

category=0\_p=0.000547104903662499

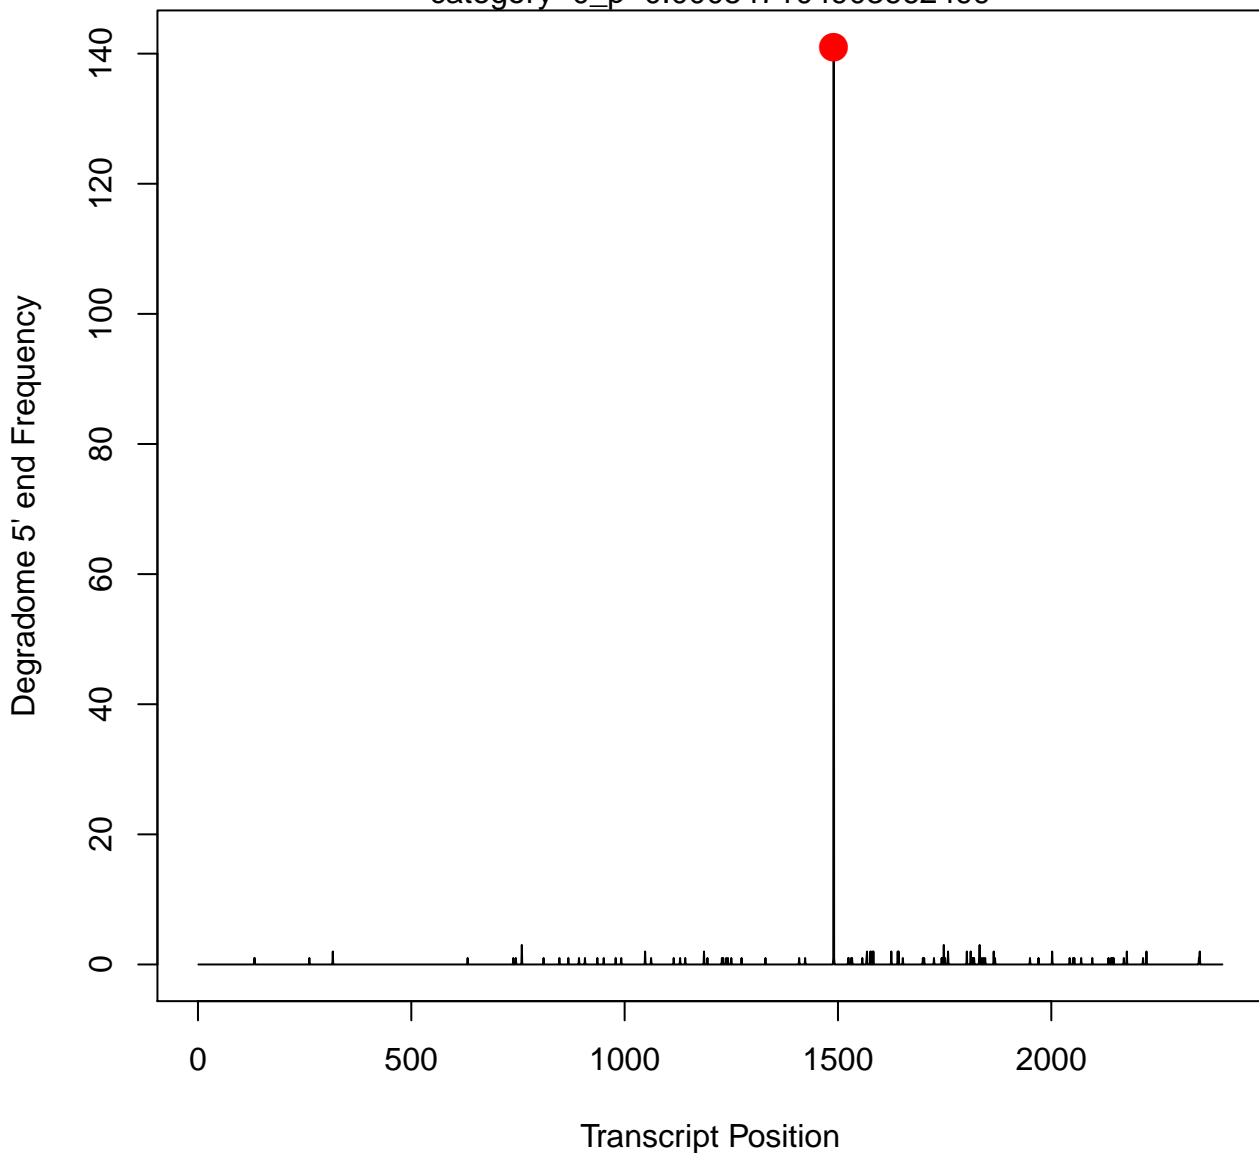

Supplement: s1 [file s1]

**T=Cluster-18410.94861\_Q=novel\_114\_S=287**

category=0\_p=0.00926018647366955

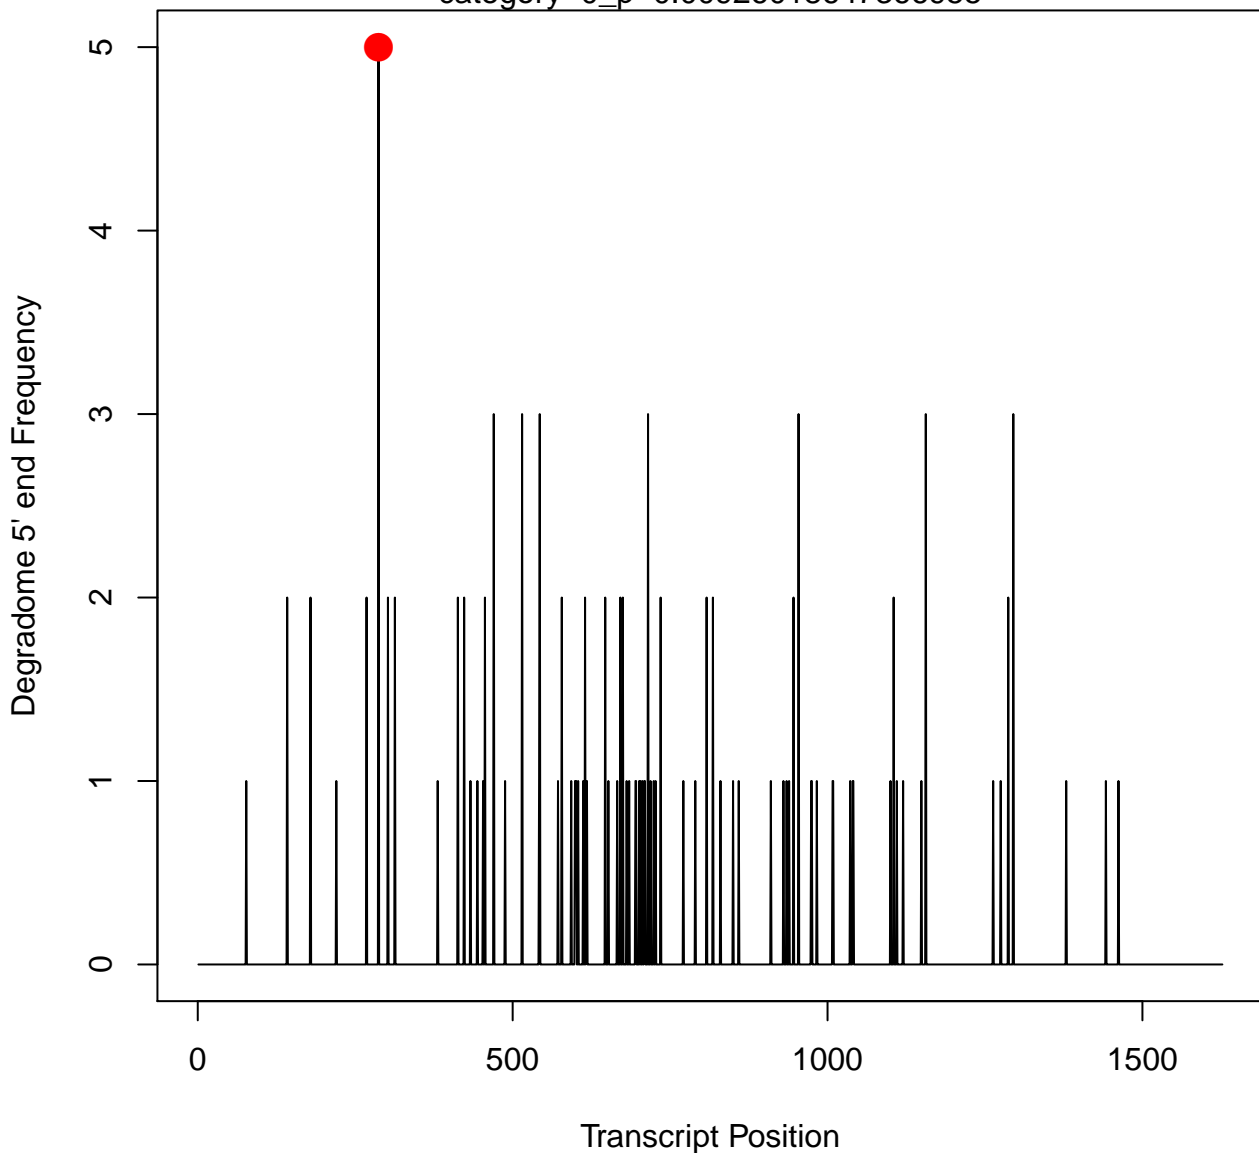

Supplement: s1 [file s1]

**T=Cluster-18410.58635\_Q=novel\_168\_S=1760**

category=0\_p=0.0243257006132207

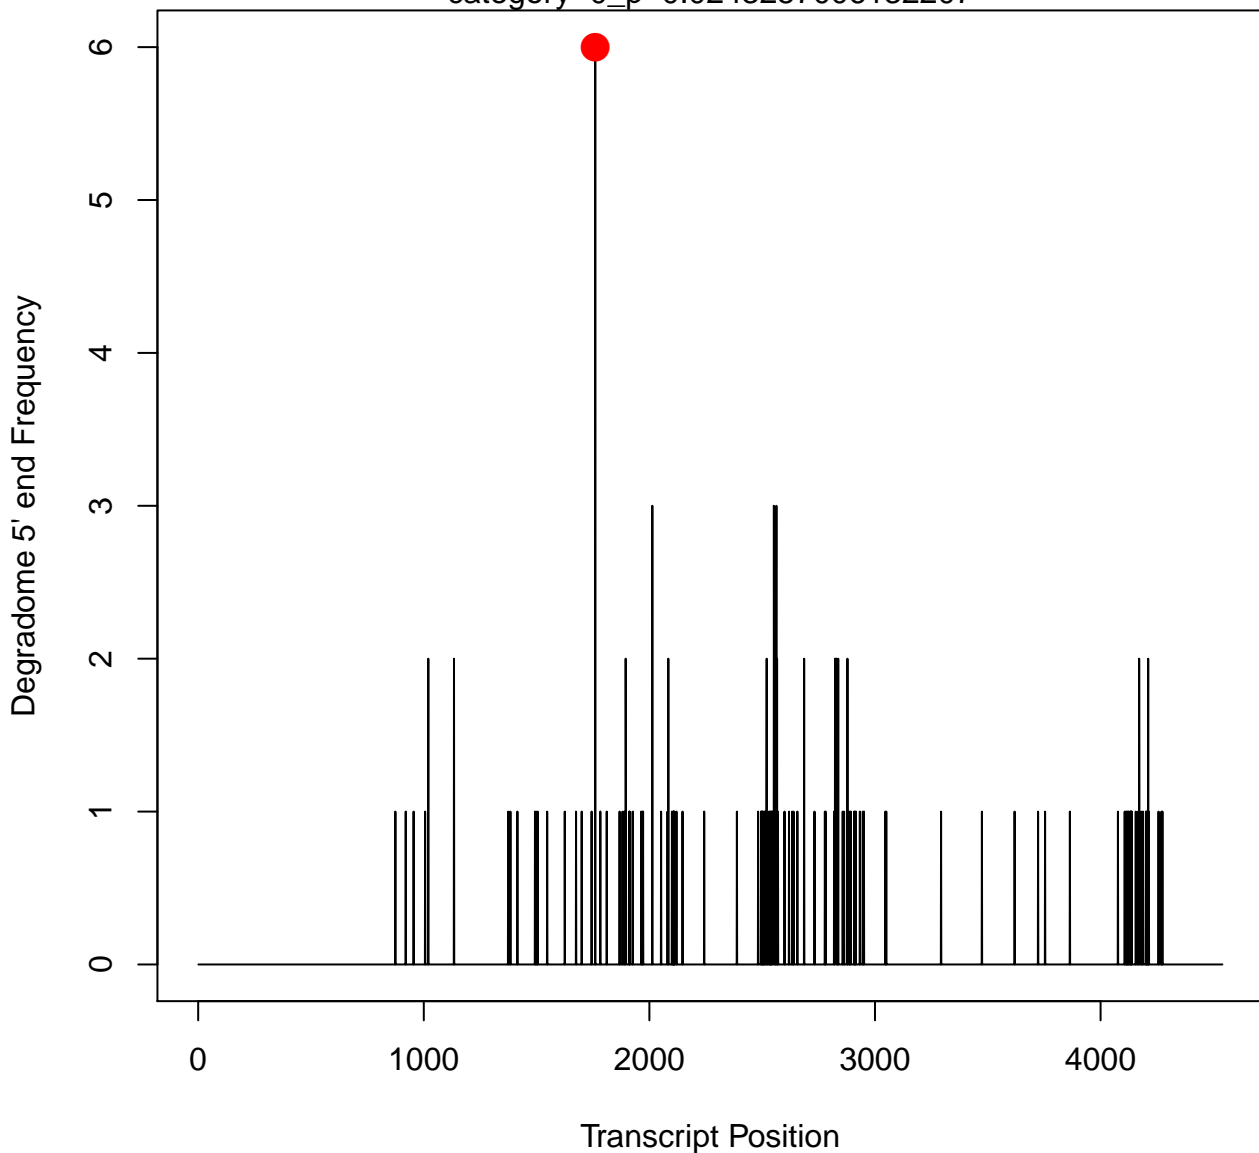

Supplement: s1 [file s1]

**T=Cluster-18410.105918\_Q=novel\_20\_S=1672**

category=1\_p=0.0139399720253284

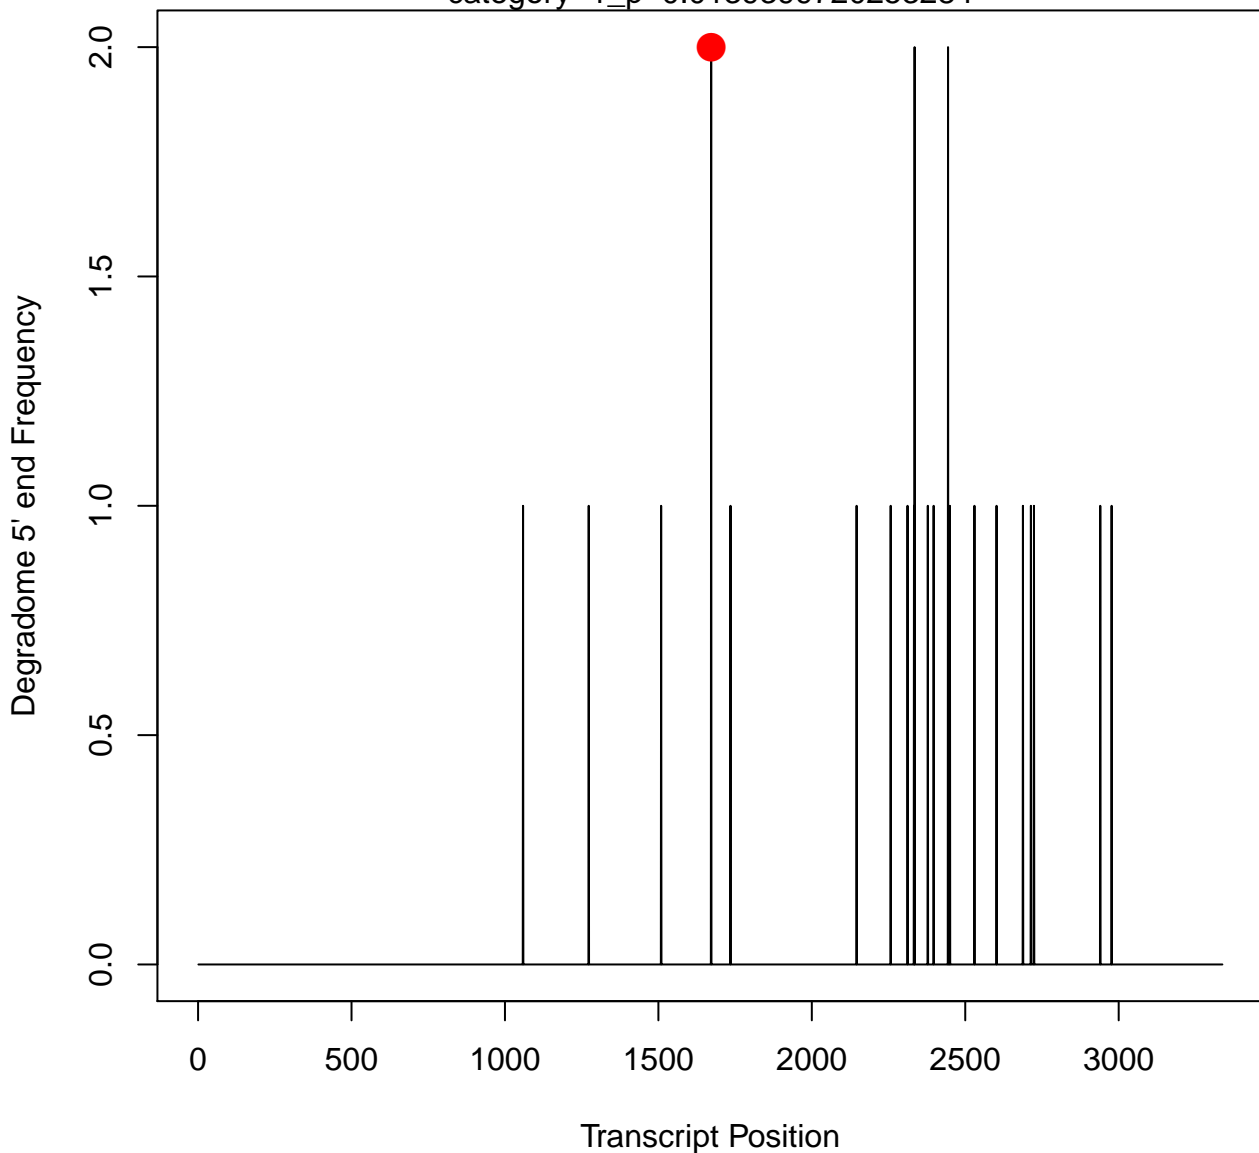

Supplement: s1 [file s1]

**T=Cluster-18410.37942\_Q=pma-miR482a\_S=617**

category=0\_p=0.0219199994275796

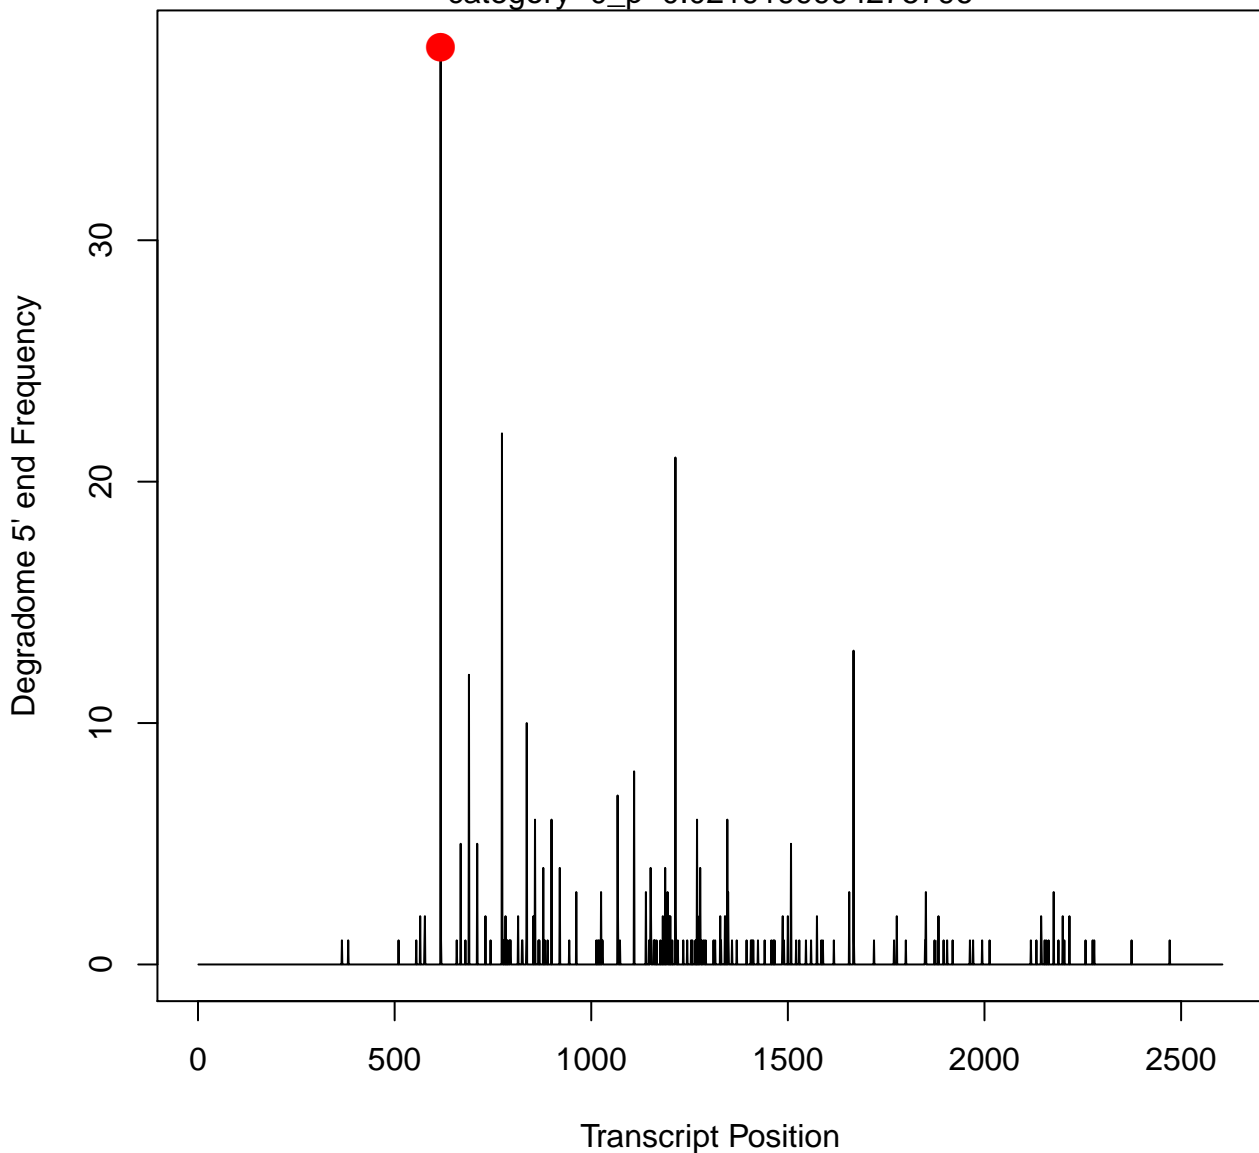

Supplement: s1 [file s1]

**T=Cluster-18410.100719\_Q=pma-miR1311\_S=814**

category=1\_p=0.0200729780221565

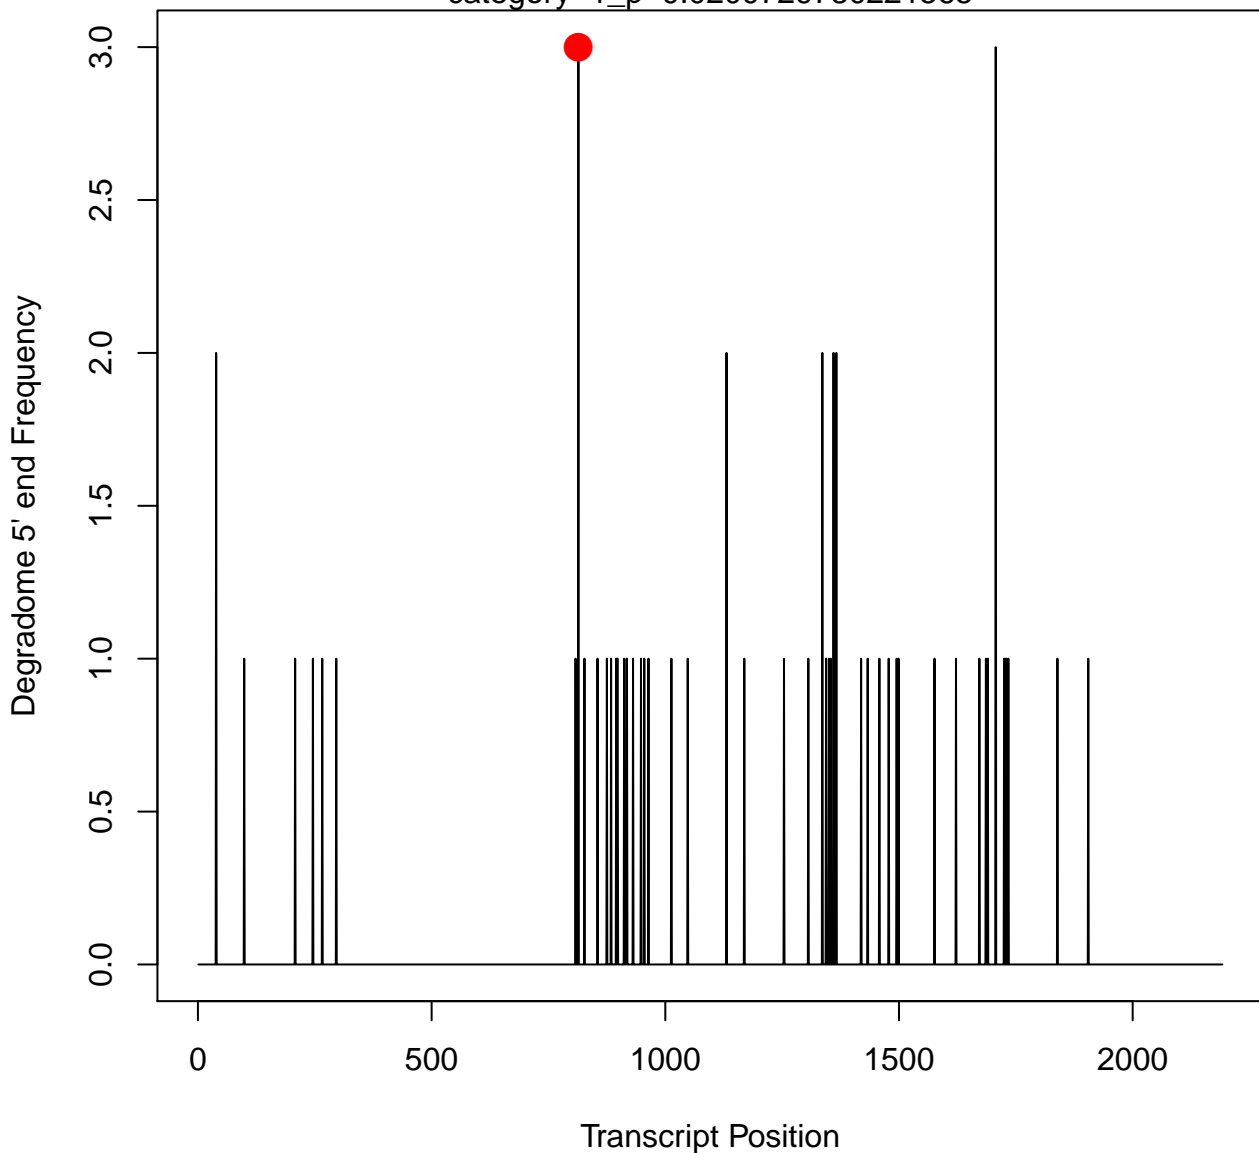

Supplement: s1 [file s1]

**T=Cluster-18410.56863\_Q=novel\_57\_S=336**

category=3\_p=0.052832191371651

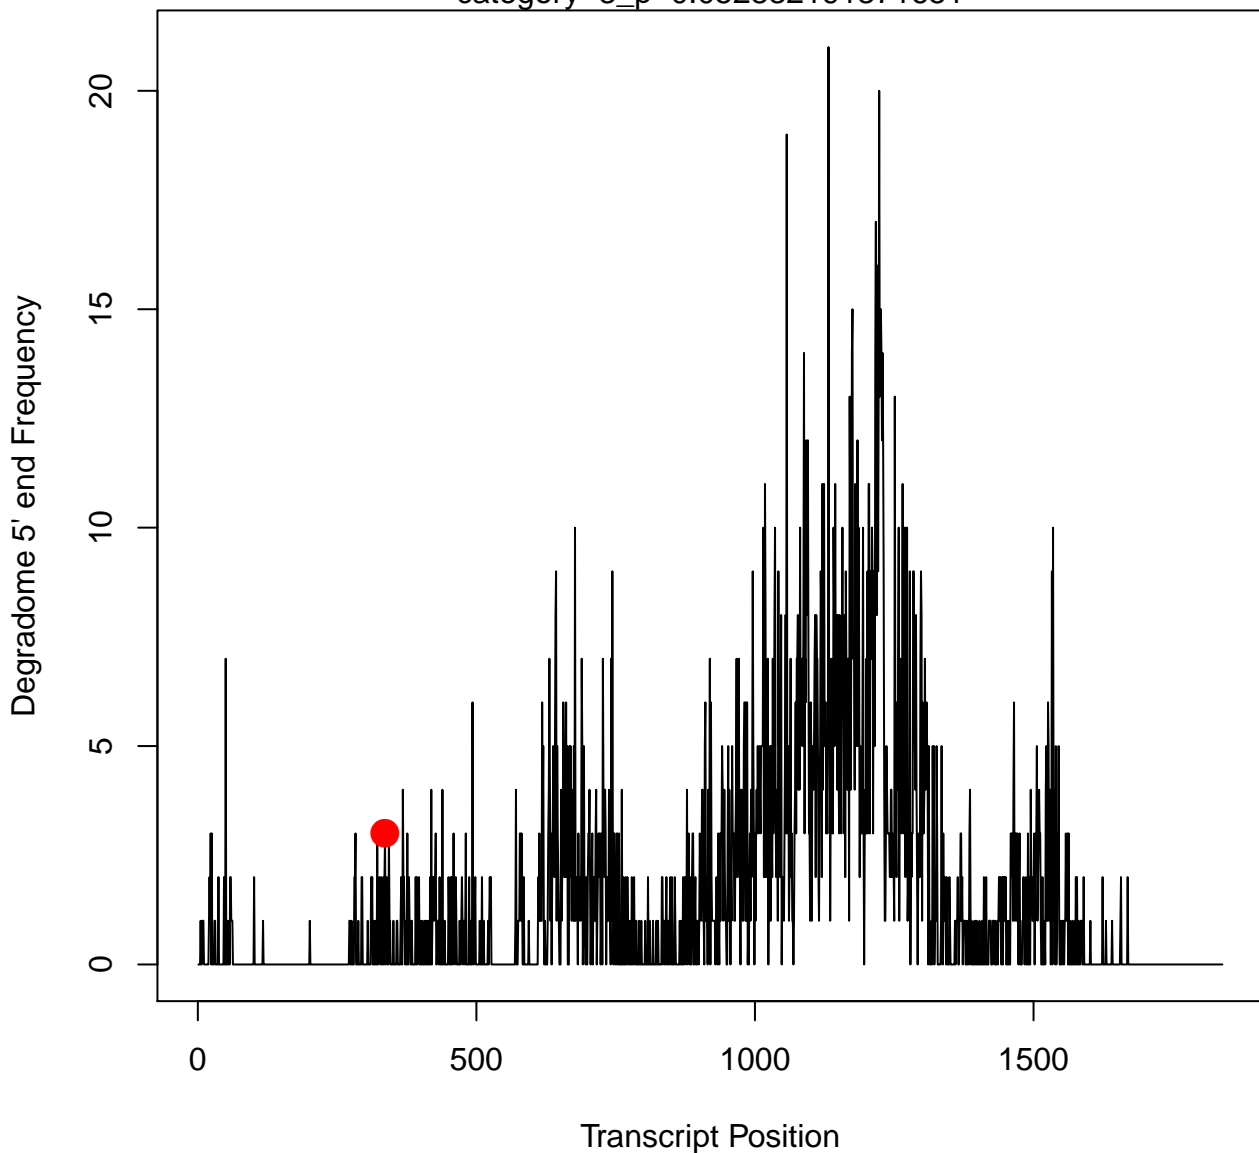

Supplement: s1 [file s1]

**T=Cluster-8577.0\_Q=novel\_14\_S=1020**

category=0\_p=0.00164041690342198

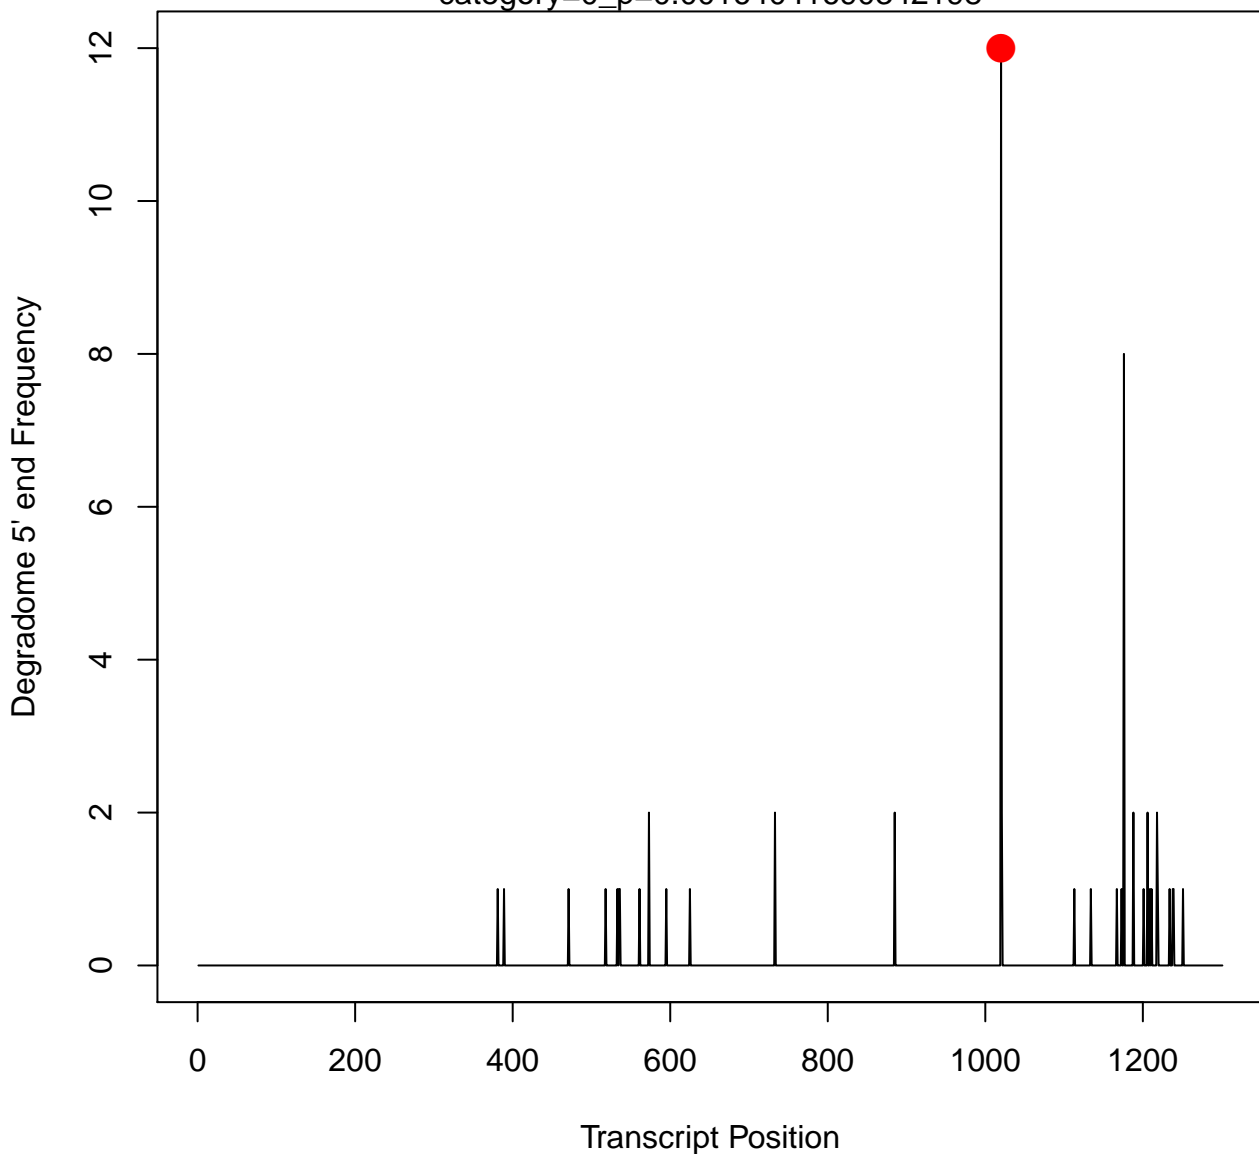

Supplement: s1 [file s1]

**T=Cluster-18410.22805\_Q=novel\_50\_S=363**

category=0\_p=0.0349463181308082

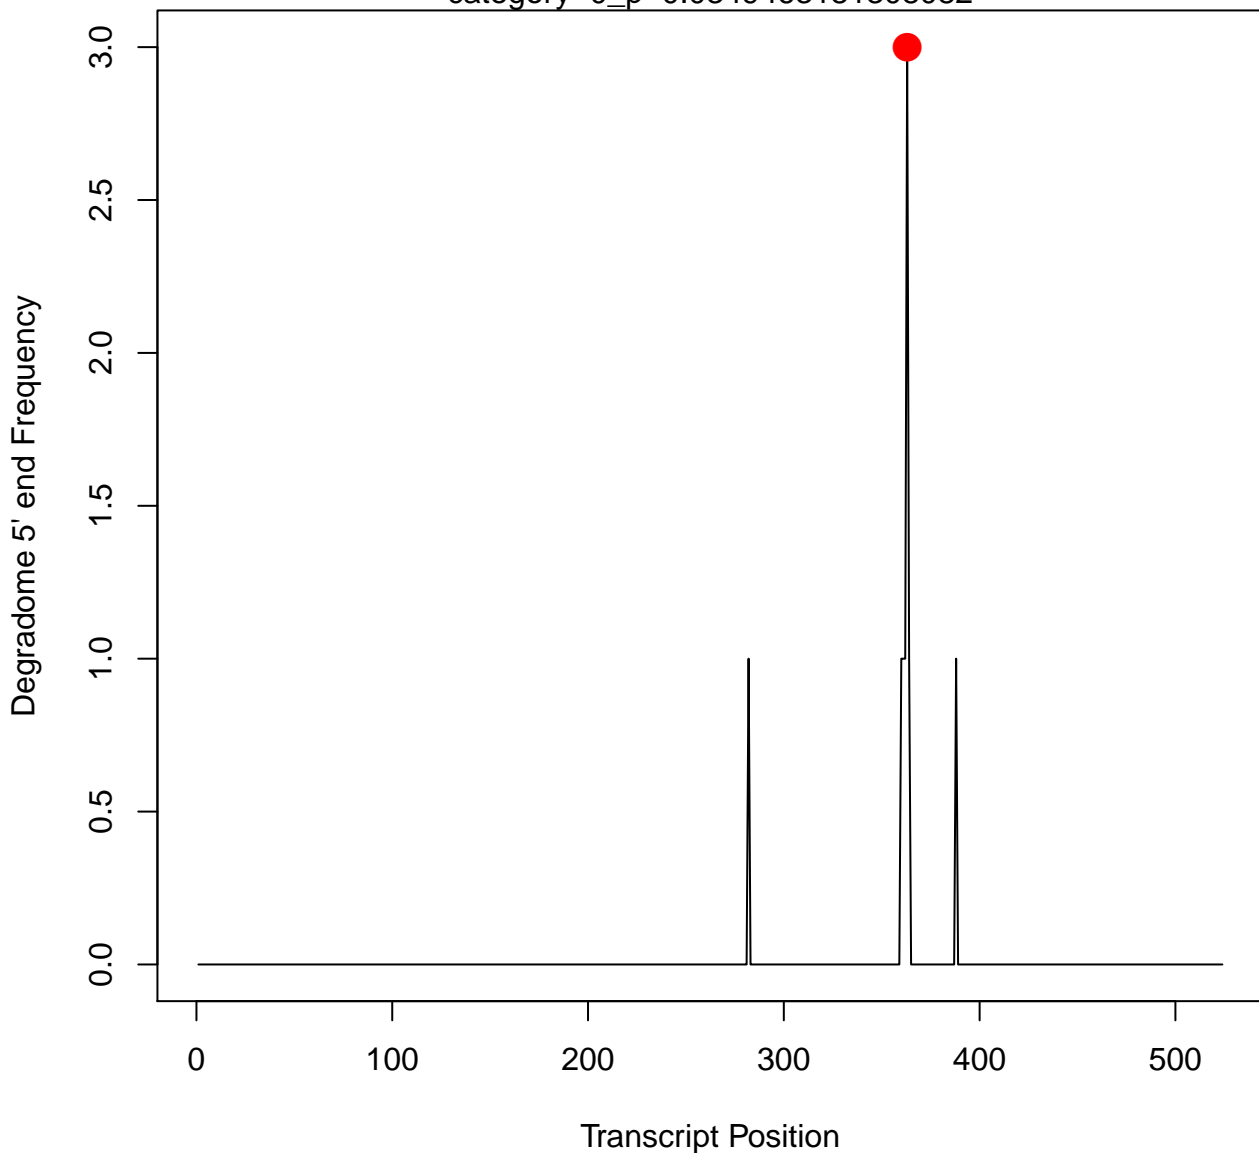

Supplement: s1 [file s1]

**T=Cluster-18410.36715\_Q=novel\_46\_S=469**

category=0\_p=0.000820545098840553

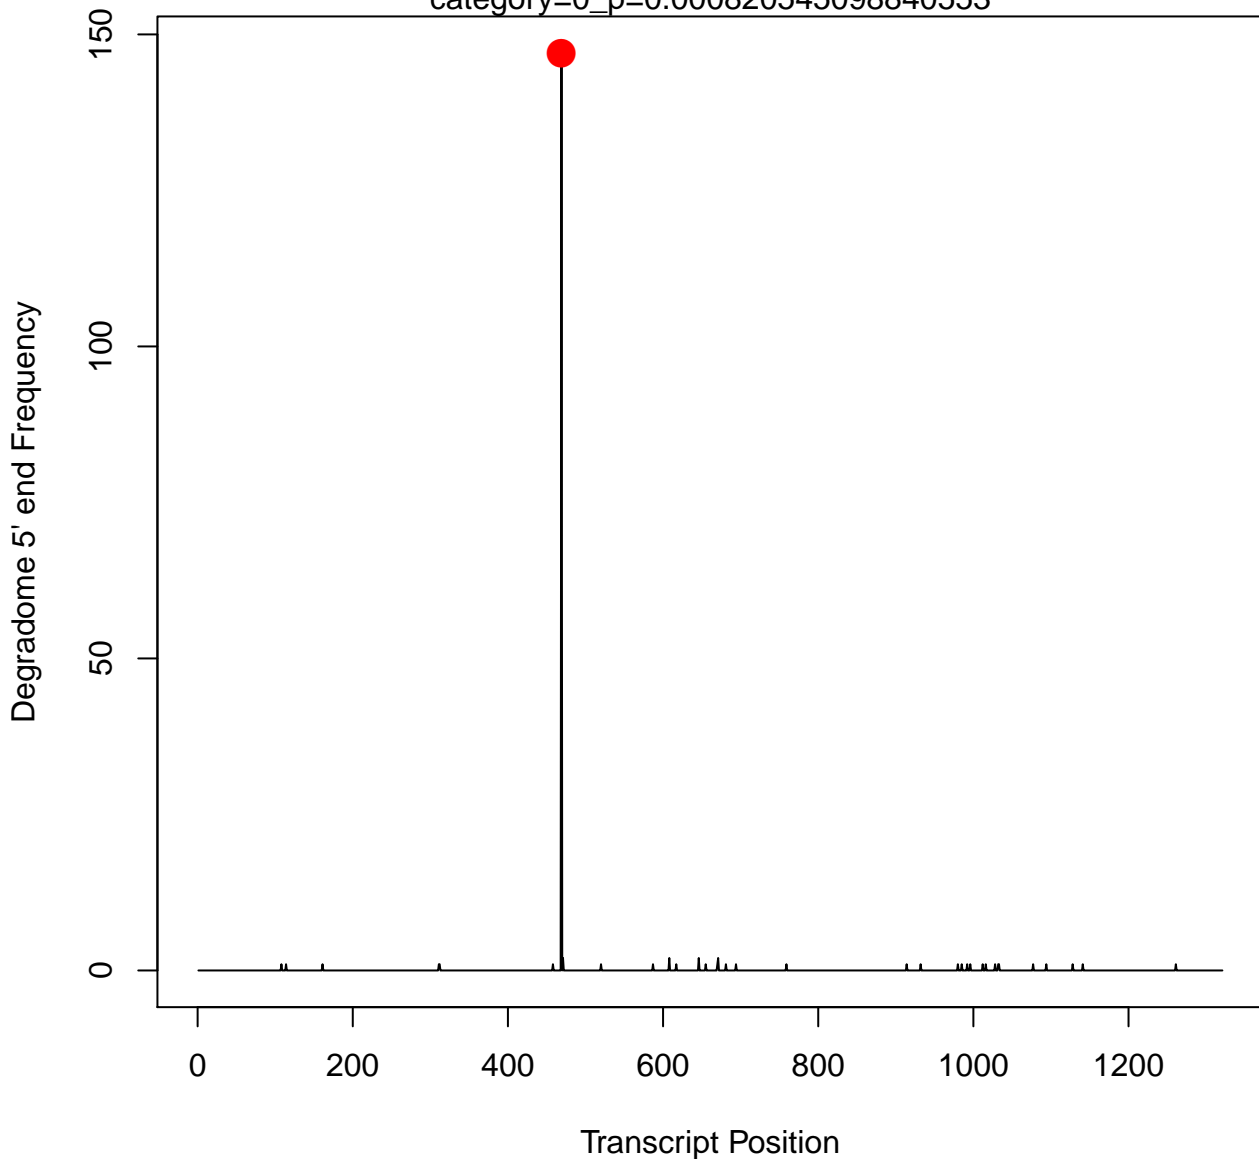

Supplement: s1 [file s1]

**T=Cluster-18410.71611\_Q=novel\_27\_S=309**

category=3\_p=0.0681306920296354

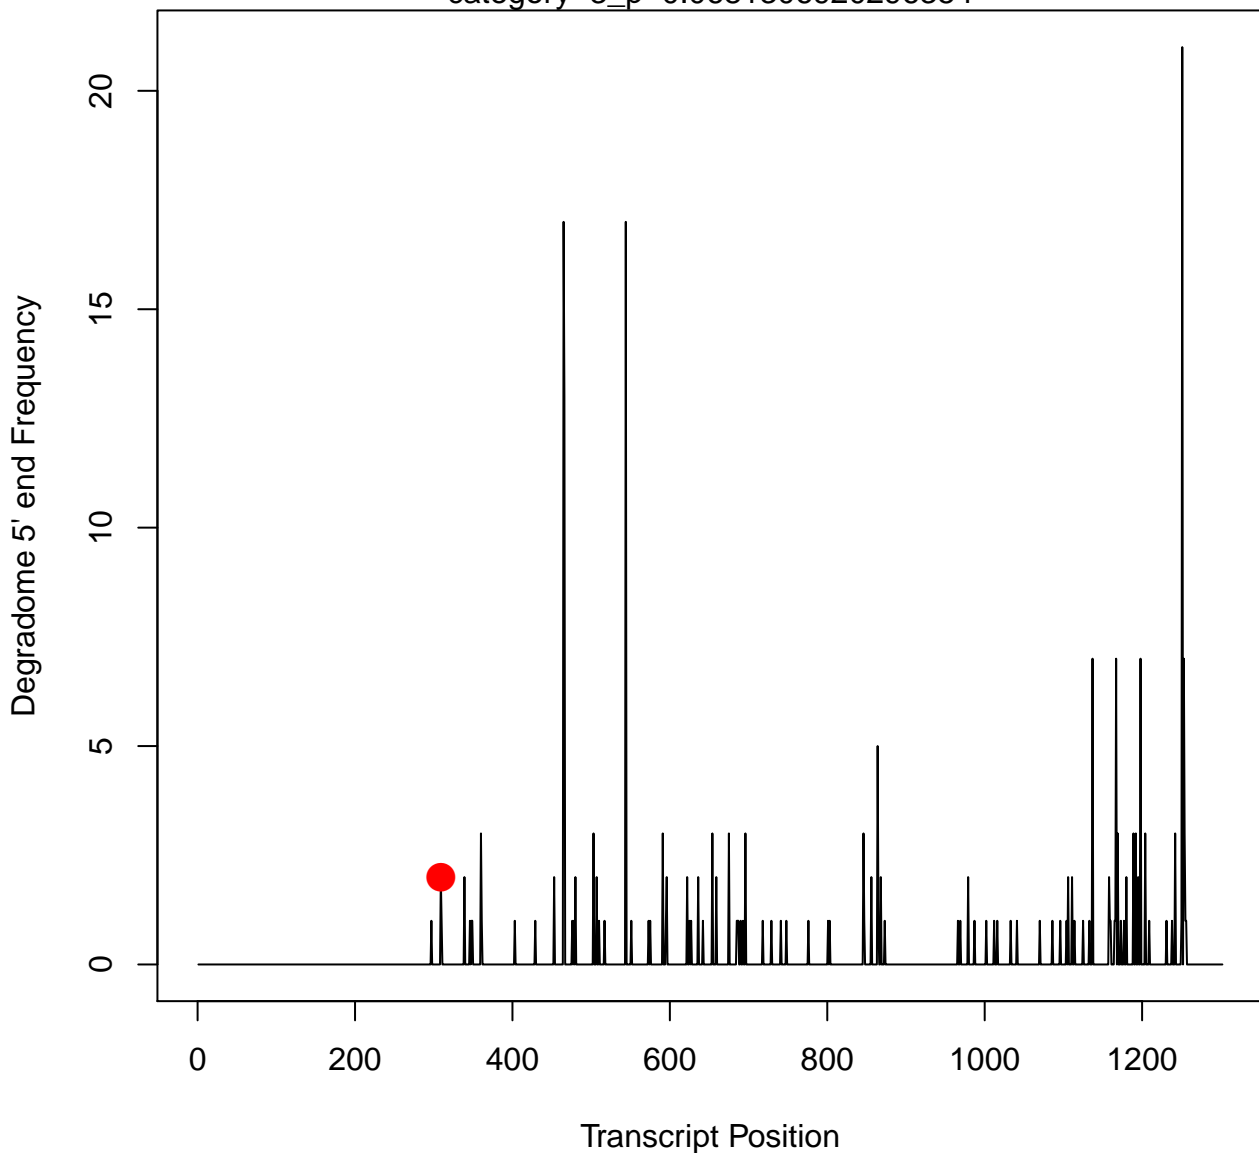

Supplement: s1 [file s1]
