# Supplementary figures and images for: Uncovering miRNA-mRNA Regulatory Modules in Developing Xylem of Pinus massoniana via Small RNA and Degradome Sequencing (part 3 of 9)
Source: MDPI journal article supplement (doi:10.3390/ijms221810154), 2021-09-21

**T=Cluster-18410.96428\_Q=novel\_2\_S=950**

category=0\_p=0.00300537520191857

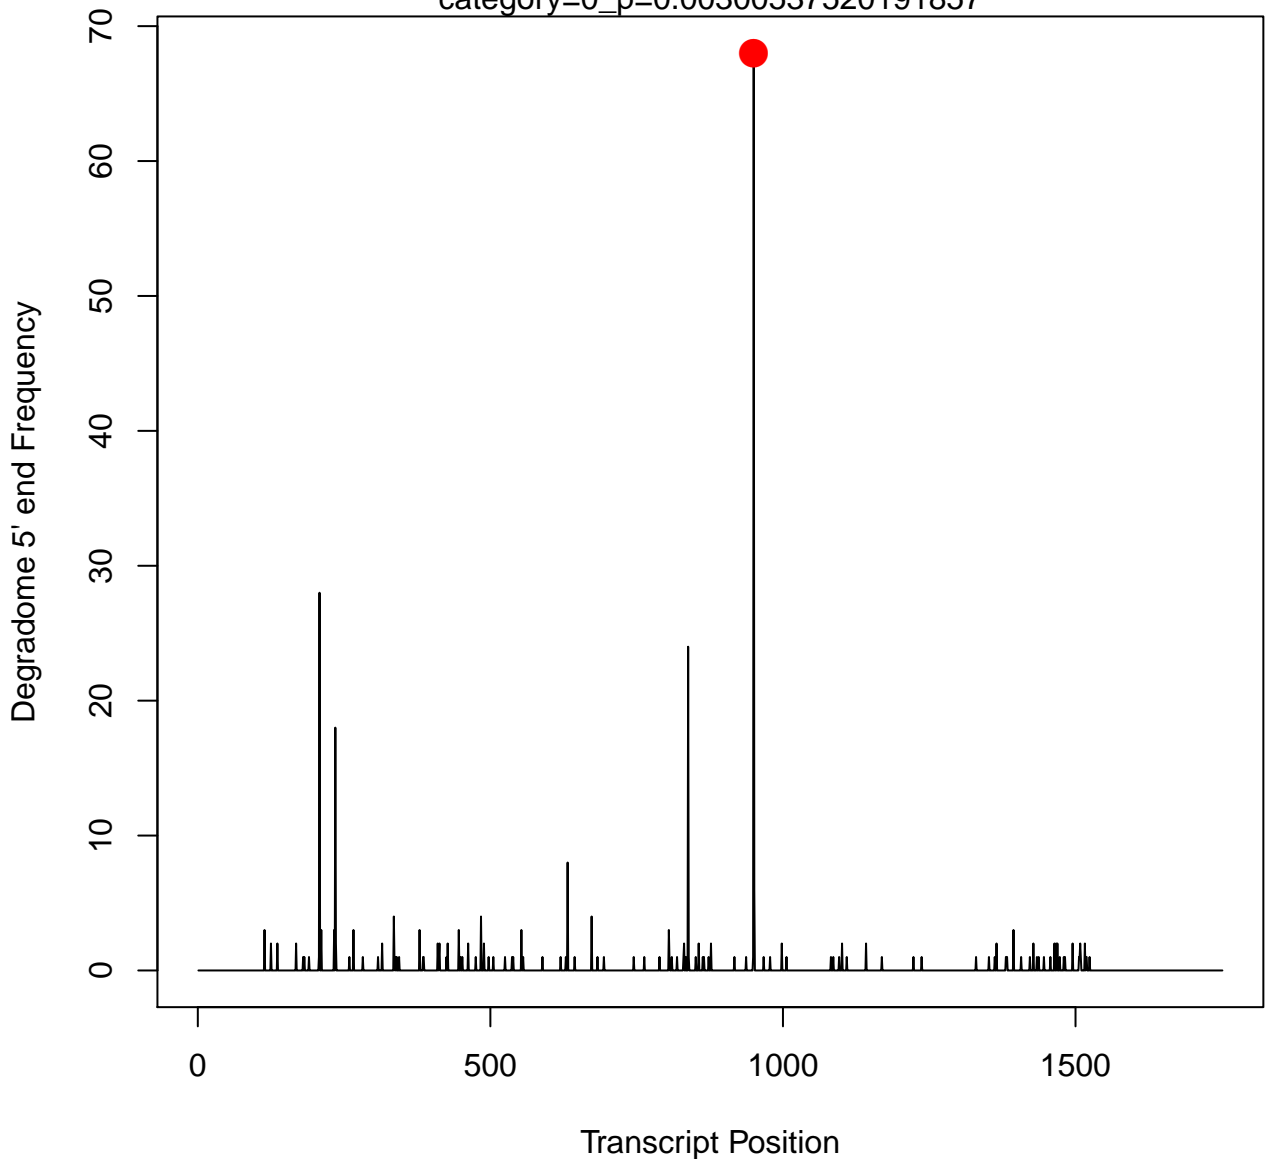

Supplement: s1 [file s1]

**T=Cluster-18410.75258\_Q=novel\_32\_S=1549**

category=0\_p=0.0404757821904089

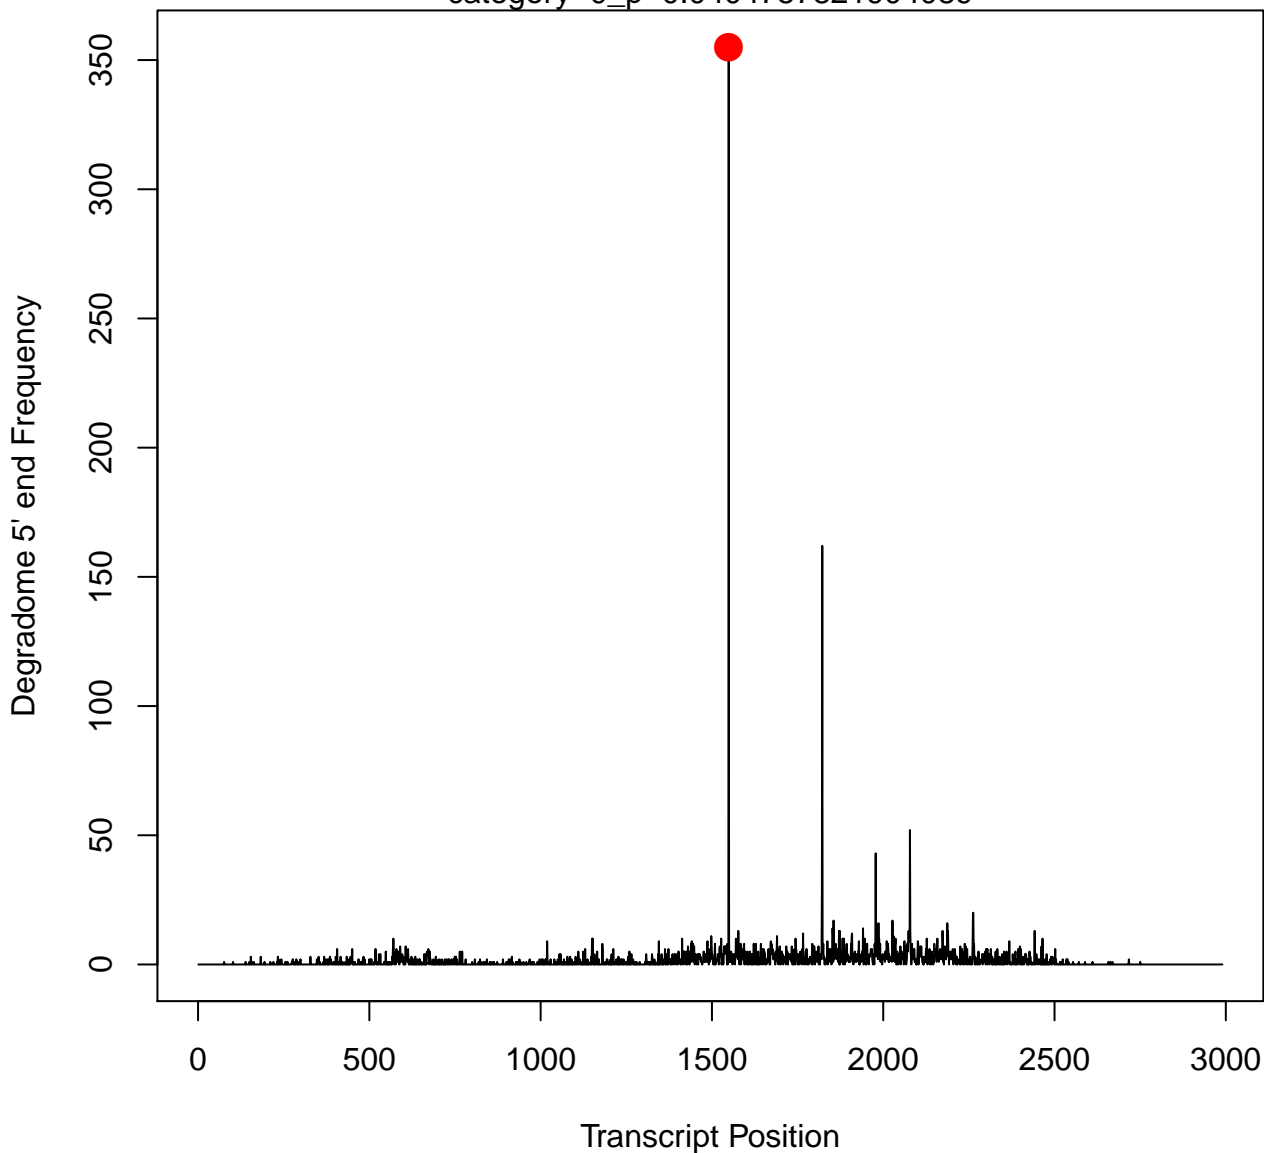

Supplement: s1 [file s1]

**T=Cluster-18410.12648\_Q=pma-miR1311\_S=226**

category=0\_p=0.0423118874139258

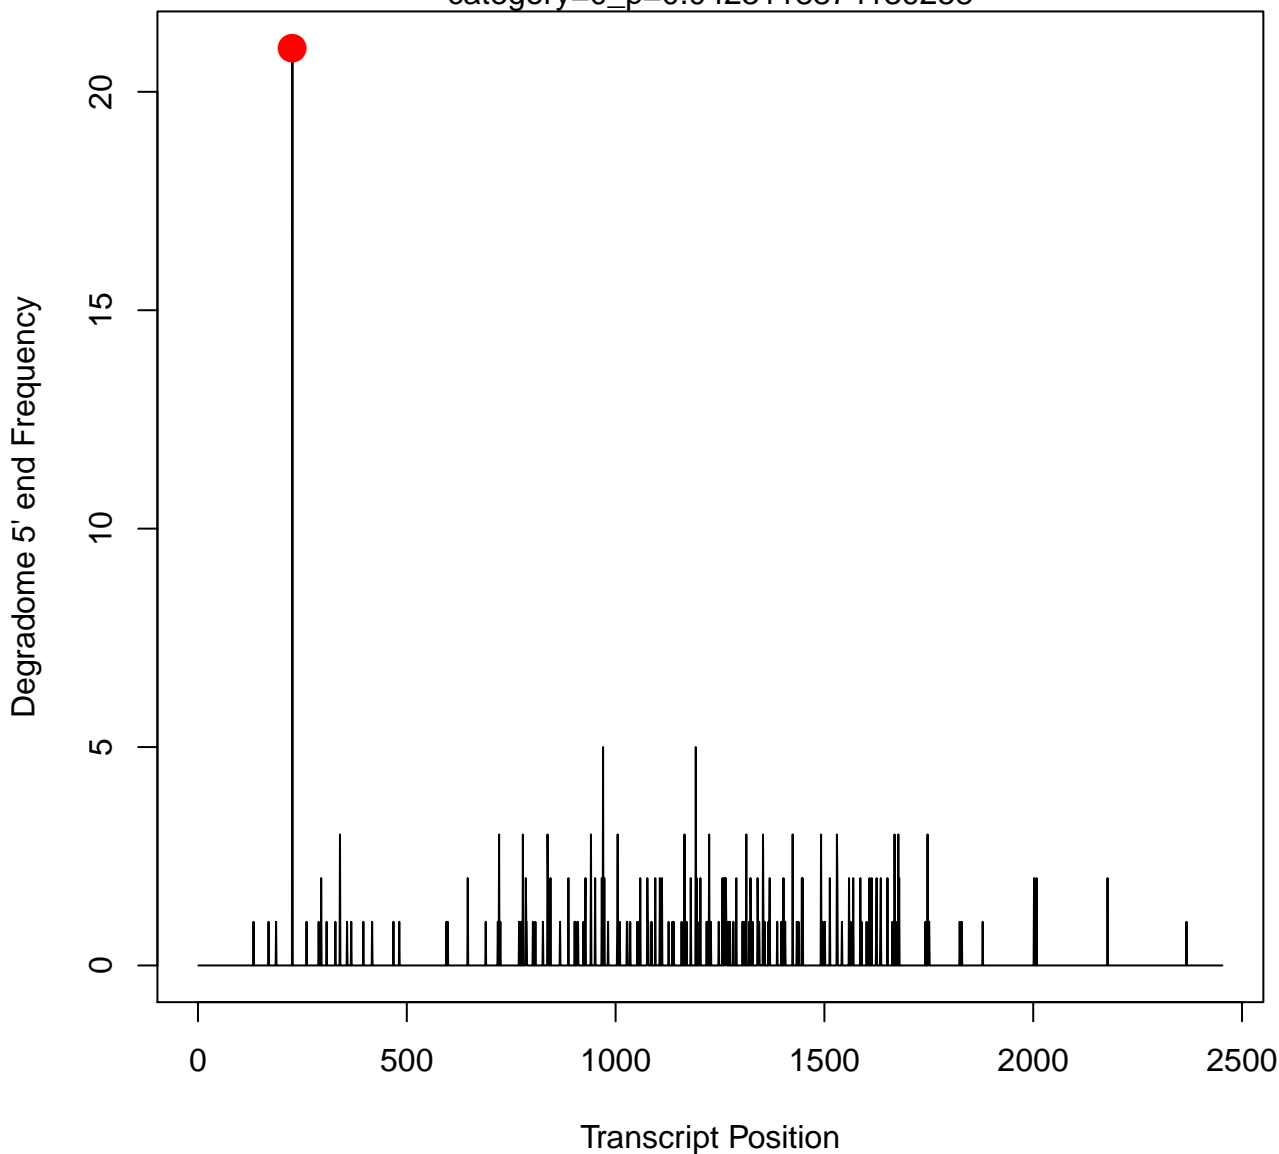

Supplement: s1 [file s1]

**T=Cluster-18410.56431\_Q=pma-miR159b\_S=460**

category=2\_p=0.0992668787568005

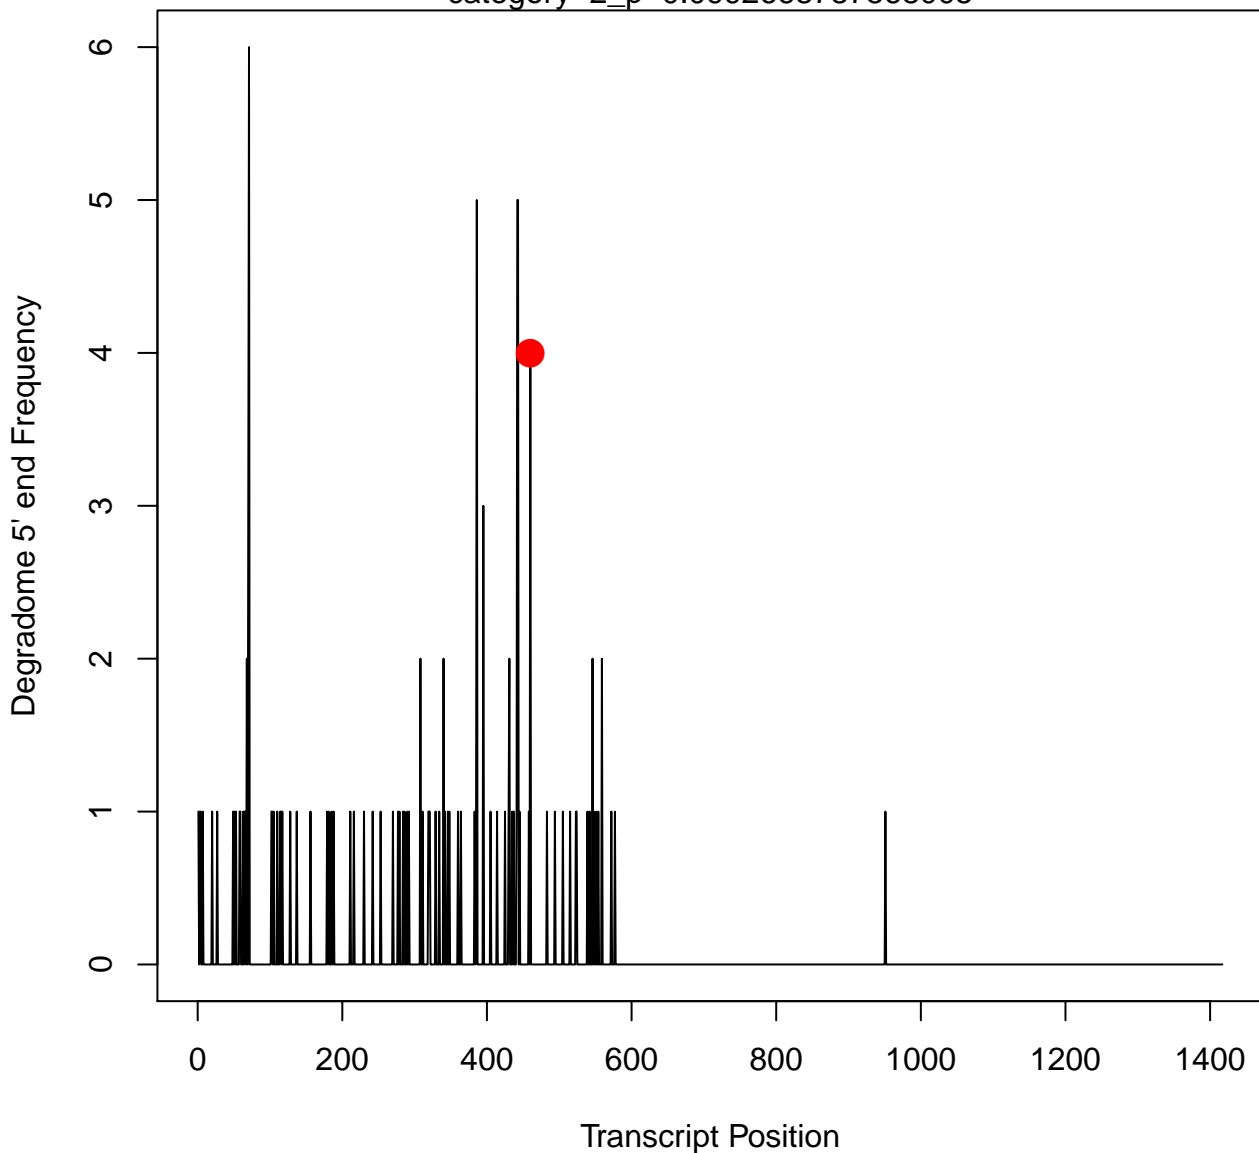

Supplement: s1 [file s1]

**T=Cluster-18410.98892\_Q=novel\_64\_S=292**

category=2\_p=0.0564267304887326

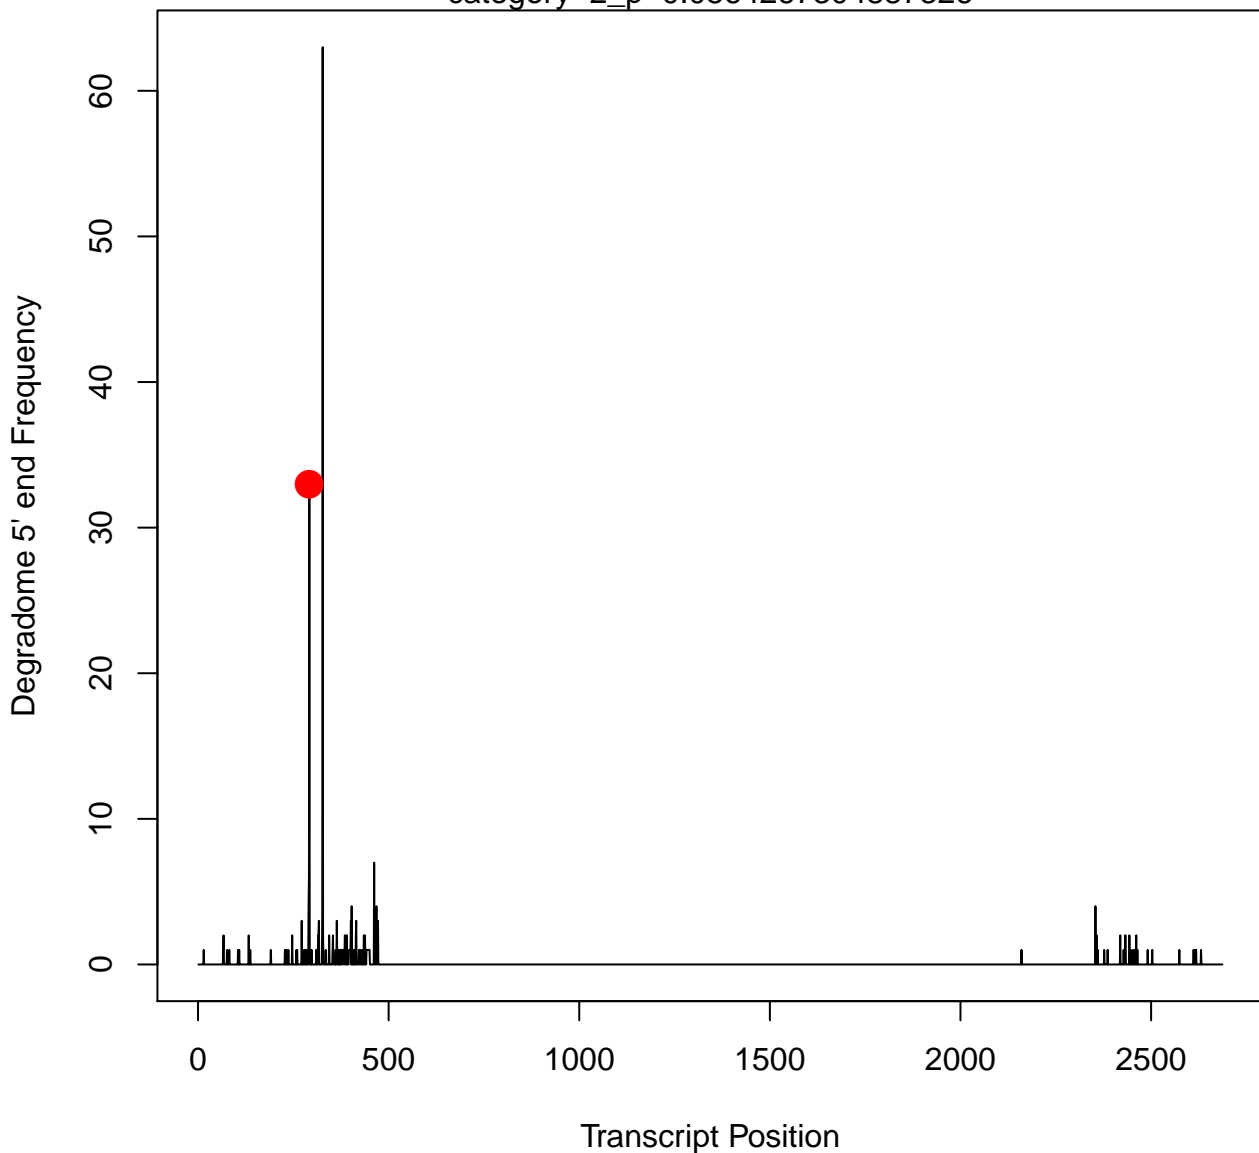

Supplement: s1 [file s1]

**T=Cluster-18410.8090\_Q=pma-miR1316\_S=2916**

category=0\_p=0.000820545098840553

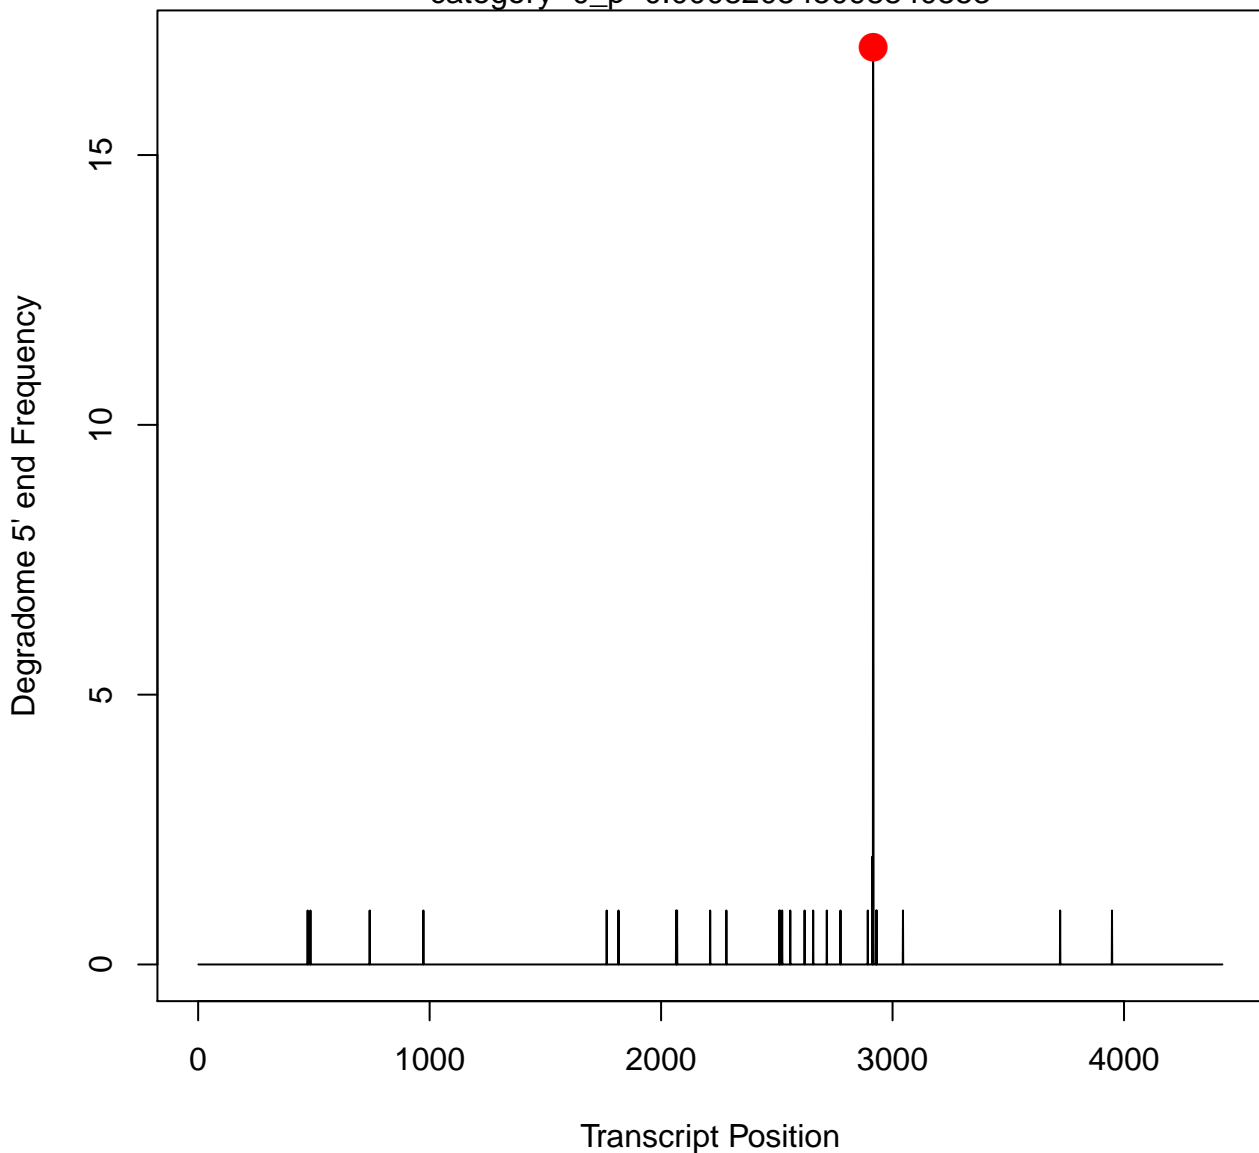

Supplement: s1 [file s1]

**T=Cluster-18410.60044\_Q=pma-miR166a\_S=69**

category=2\_p=0.0115490438418195

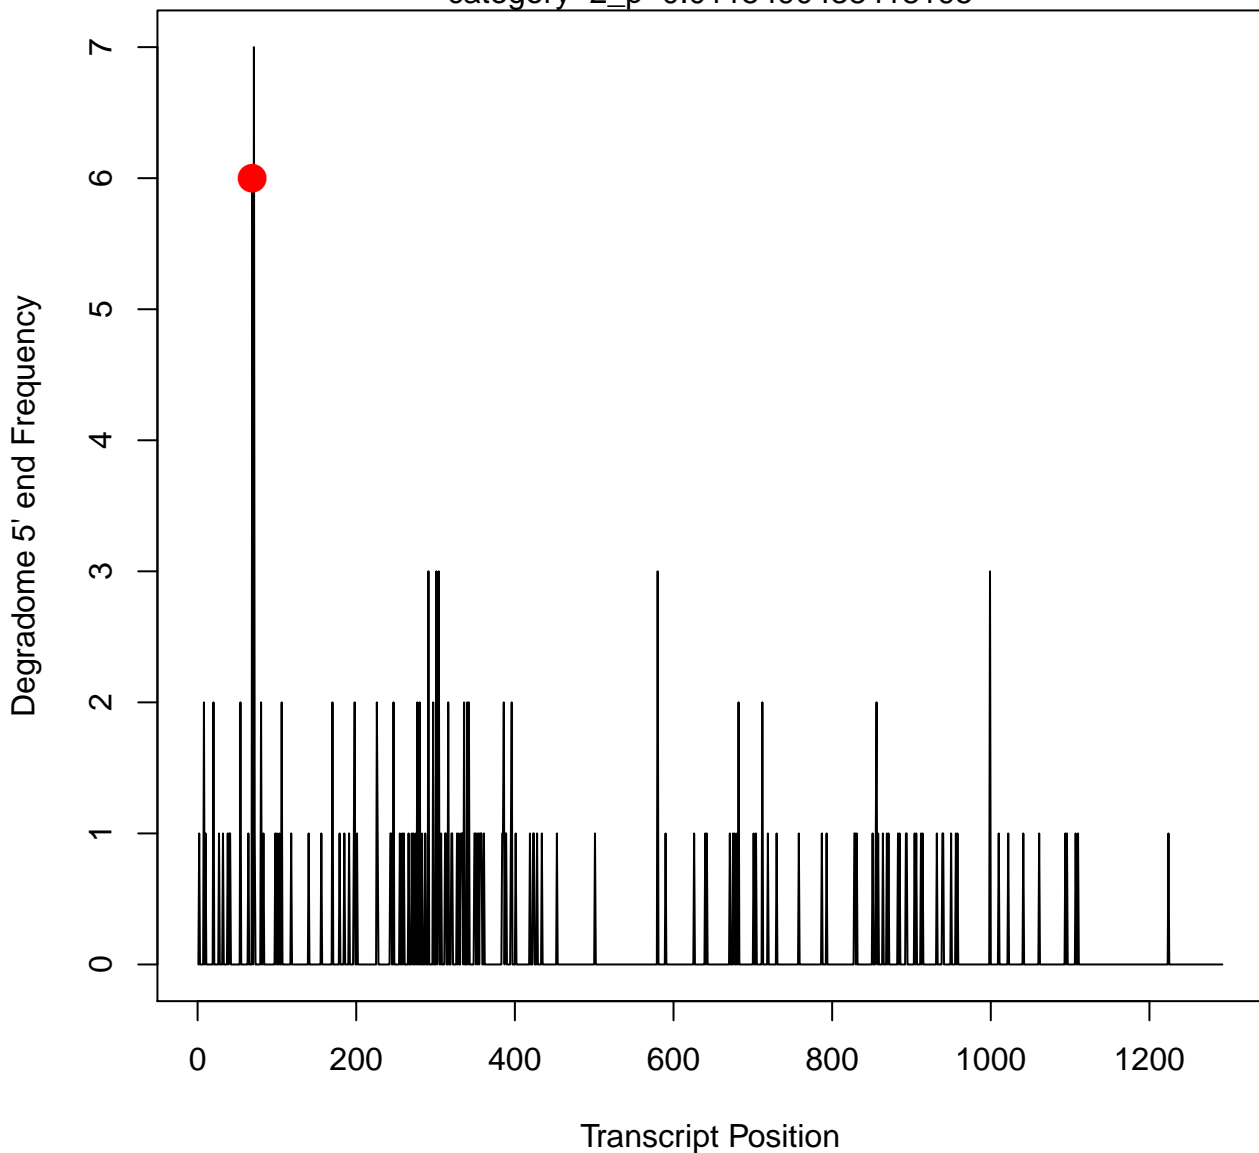

Supplement: s1 [file s1]

**T=Cluster-21242.0\_Q=novel\_114\_S=1197**

category=0\_p=0.00436846732795781

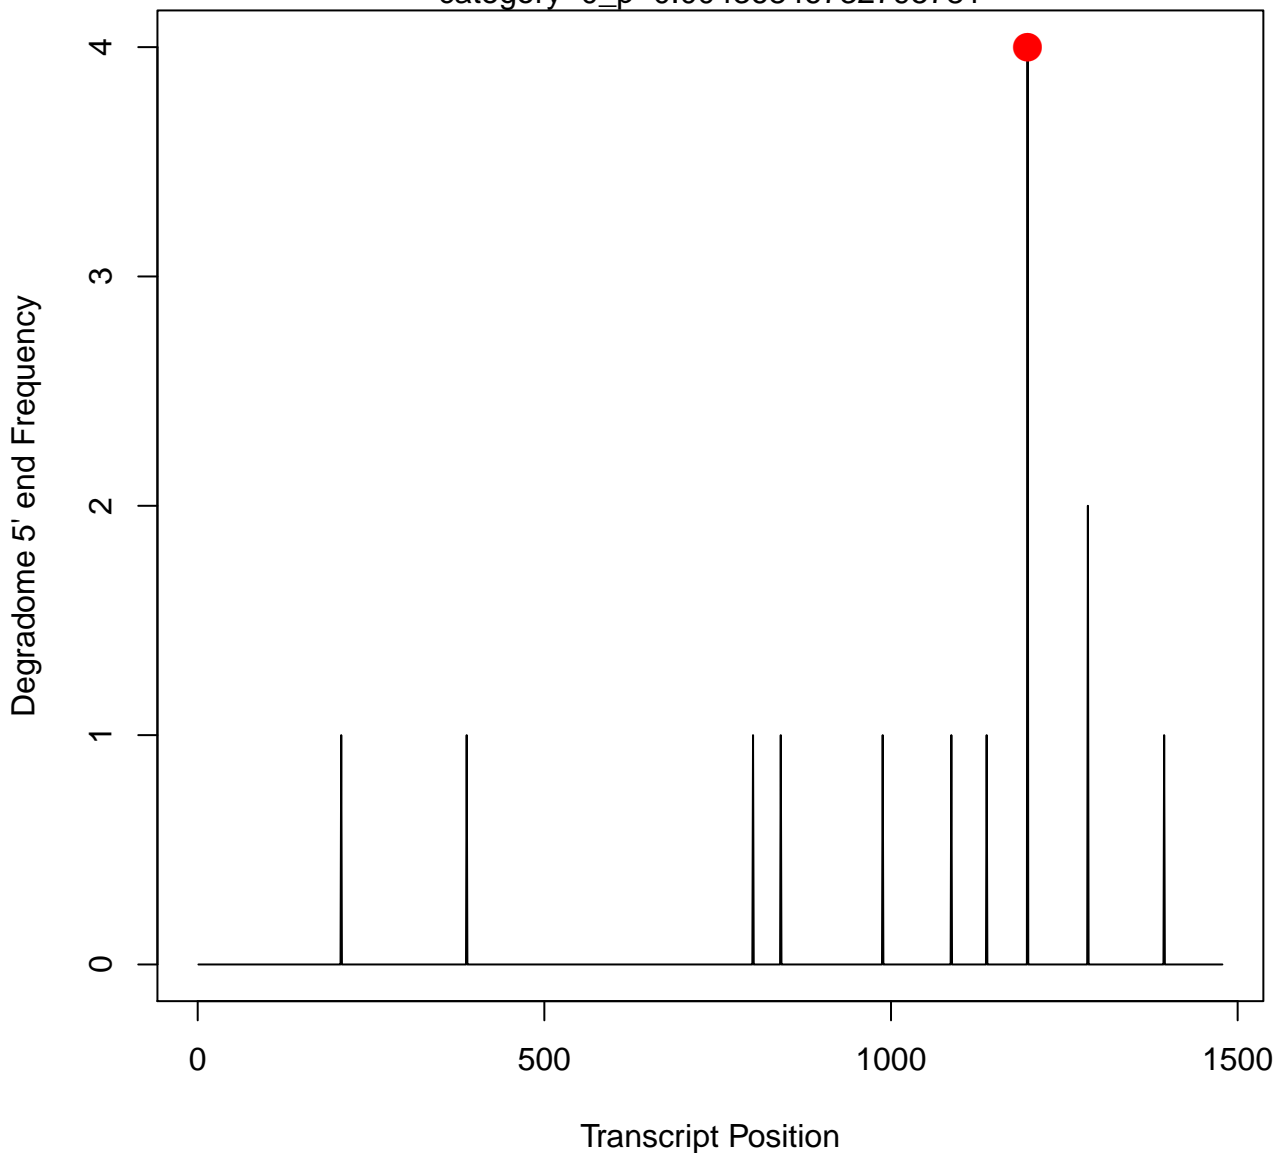

Supplement: s1 [file s1]

**T=Cluster-18410.25724\_Q=novel\_15\_S=186**

category=0\_p=0.00191355797950399

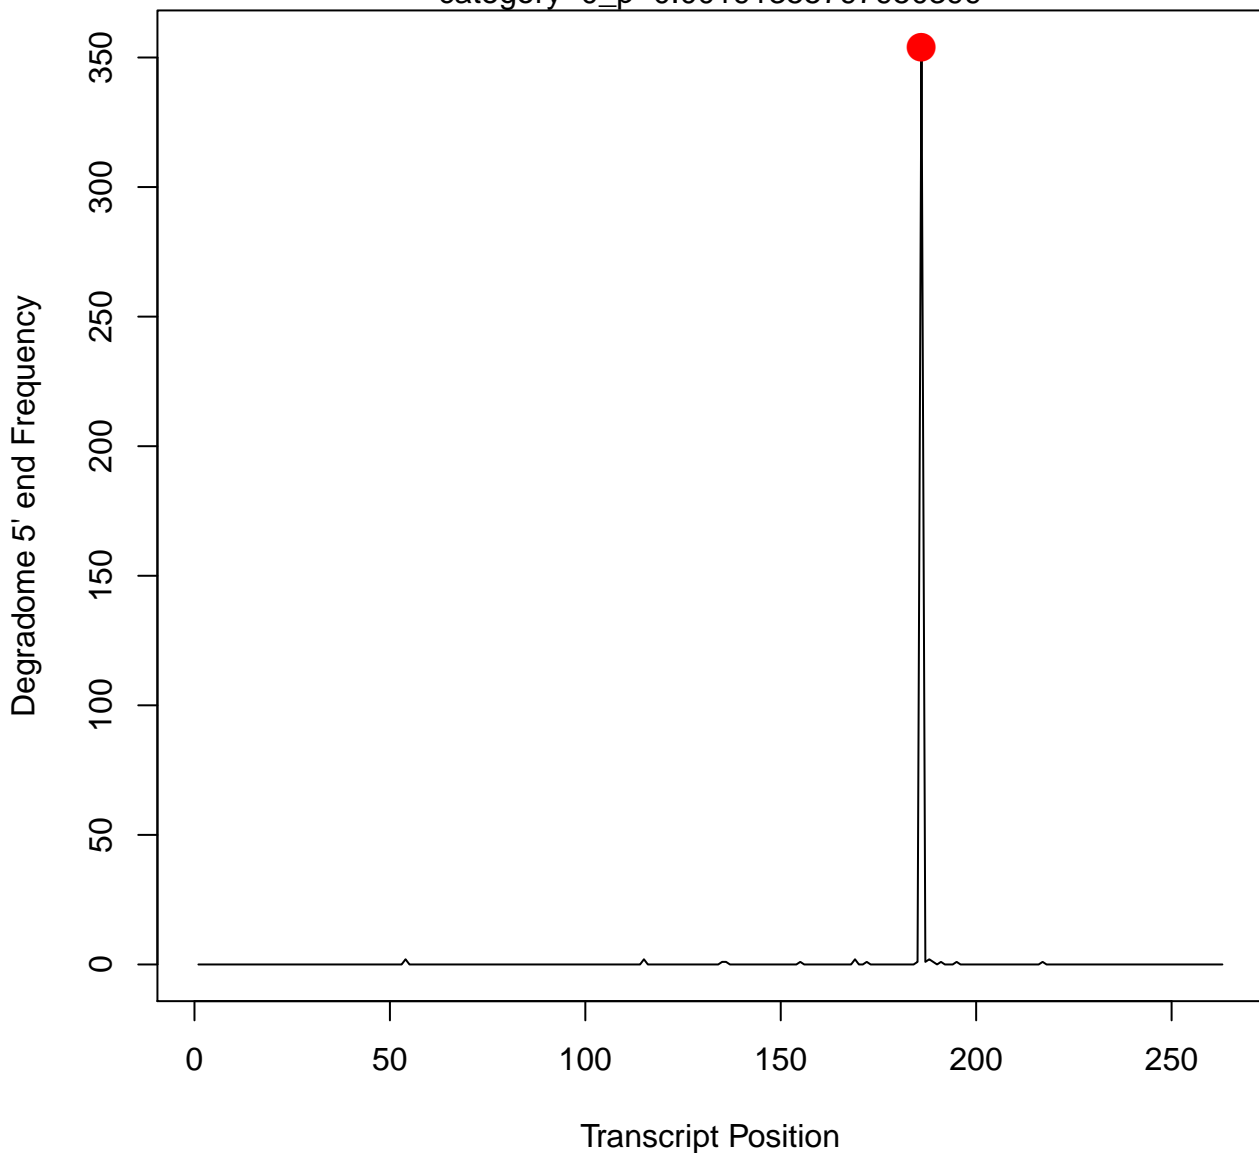

Supplement: s1 [file s1]

**T=Cluster-18410.115041\_Q=novel\_74\_S=711**

category=0\_p=0.00654553945797942

Degradome 5' end Frequency

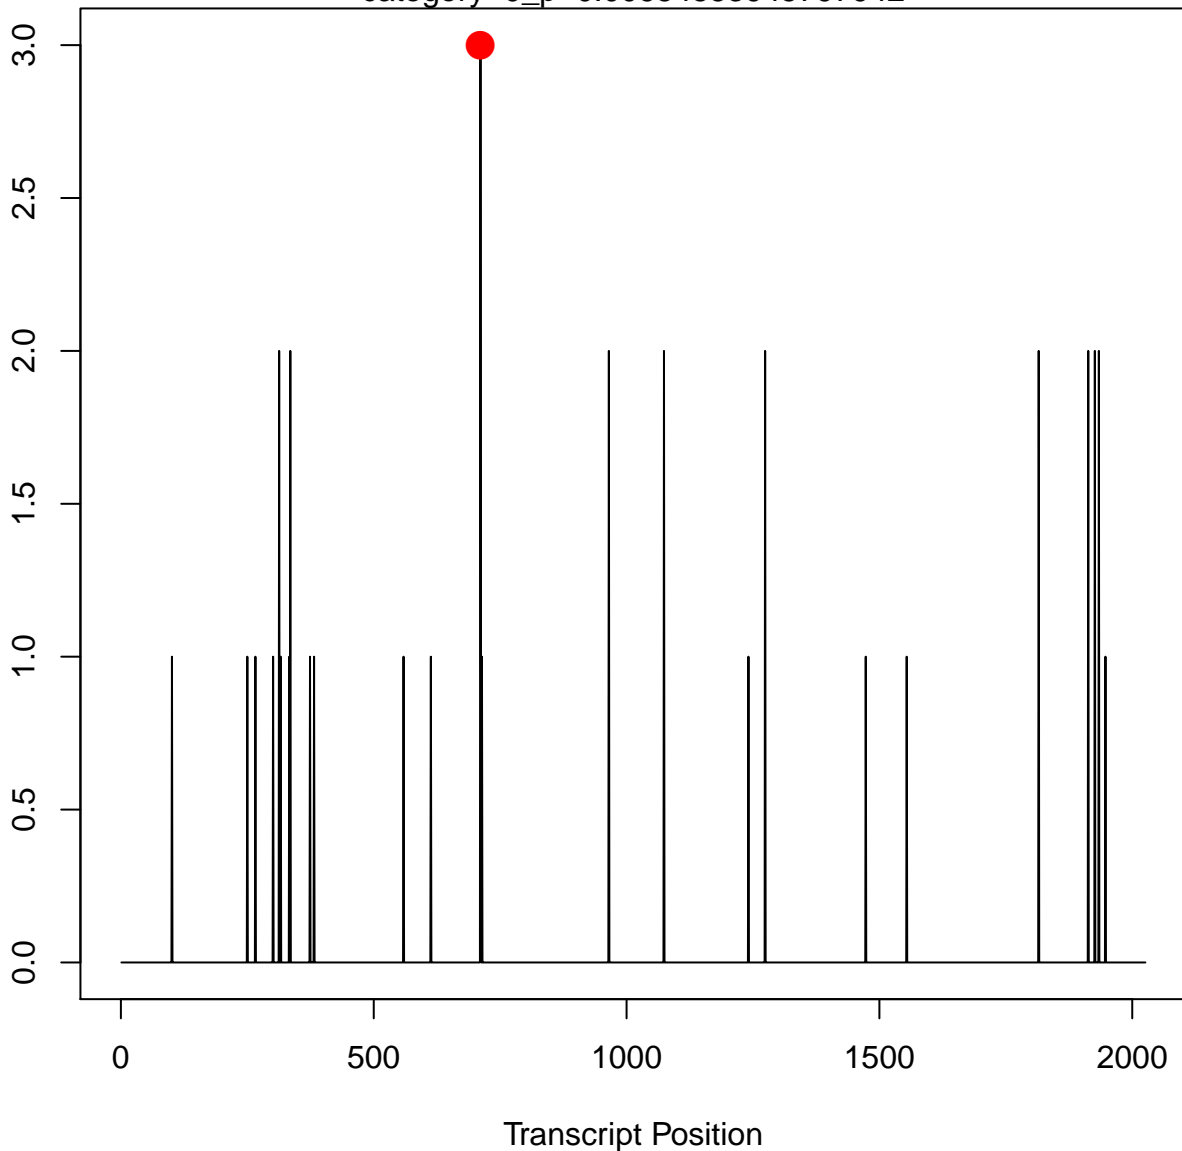

Supplement: s1 [file s1]

**T=Cluster-18410.36577\_Q=novel\_34\_S=409**

category=2\_p=0.0342485307007228

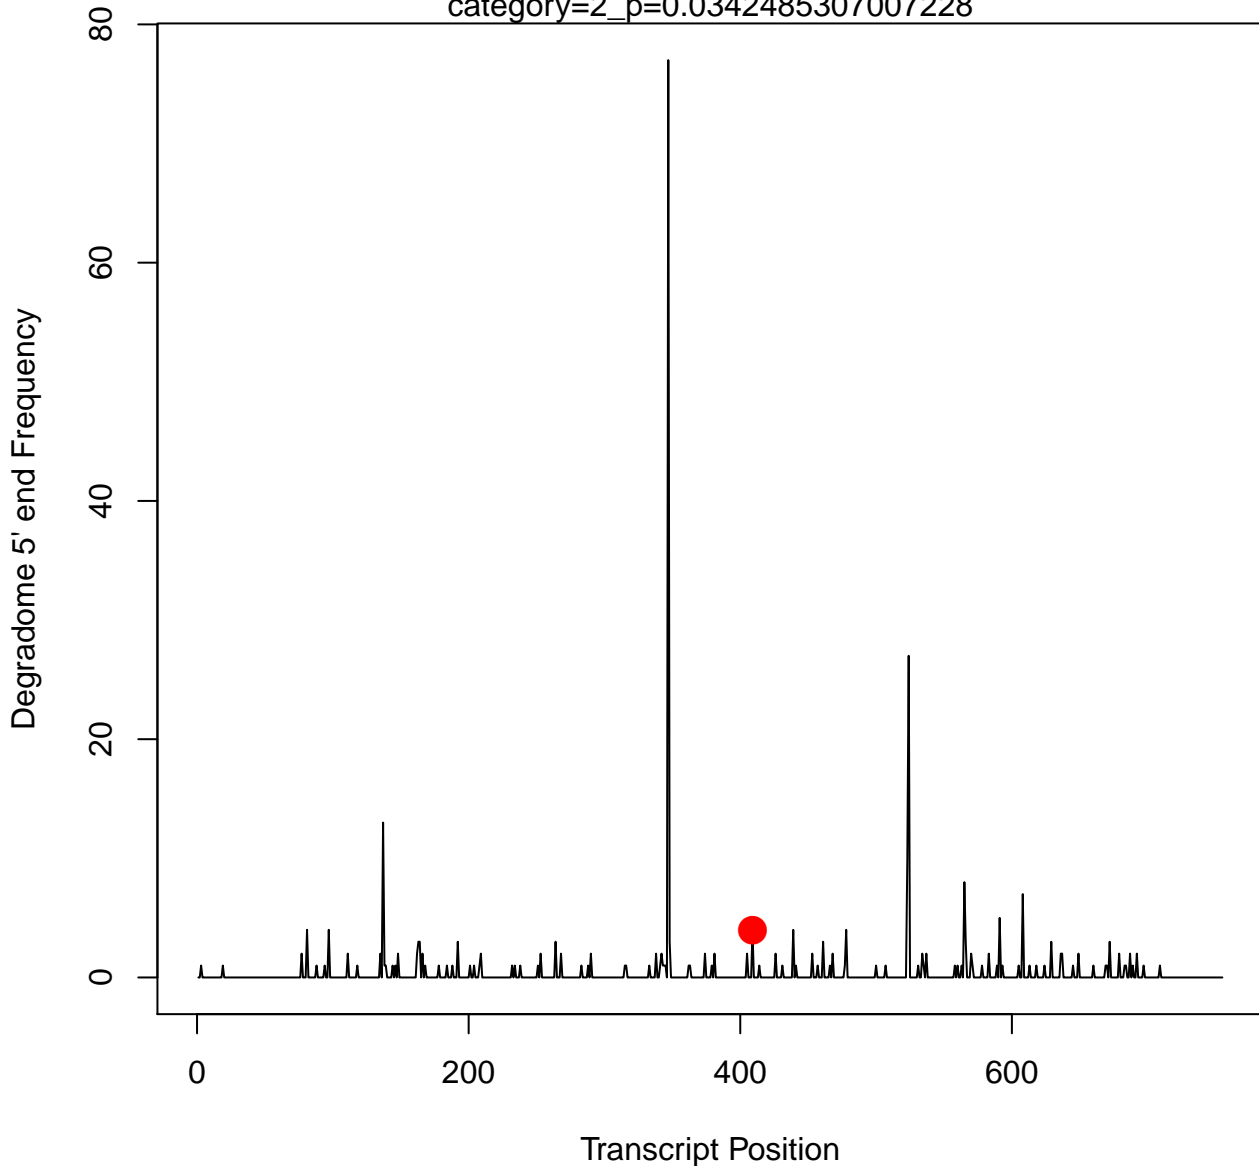

Supplement: s1 [file s1]

**T=Cluster-18410.14055\_Q=novel\_46\_S=1585**

category=0\_p=0.0940575164899539

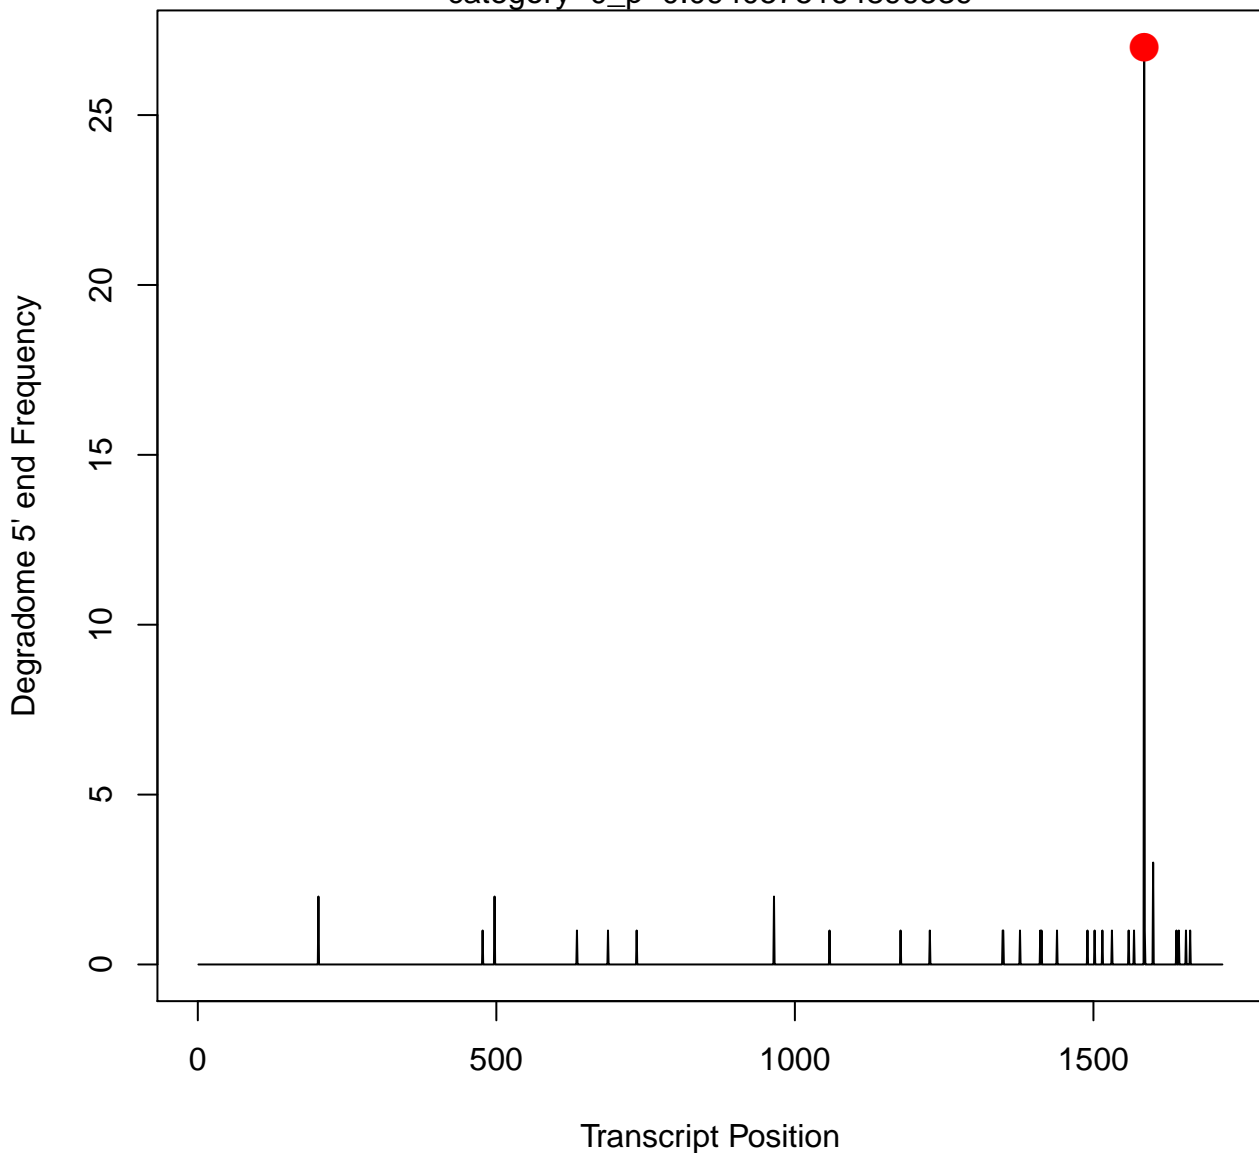

Supplement: s1 [file s1]

**T=Cluster-18410.39723\_Q=novel\_159\_S=921**

category=2\_p=0.0115490438418195

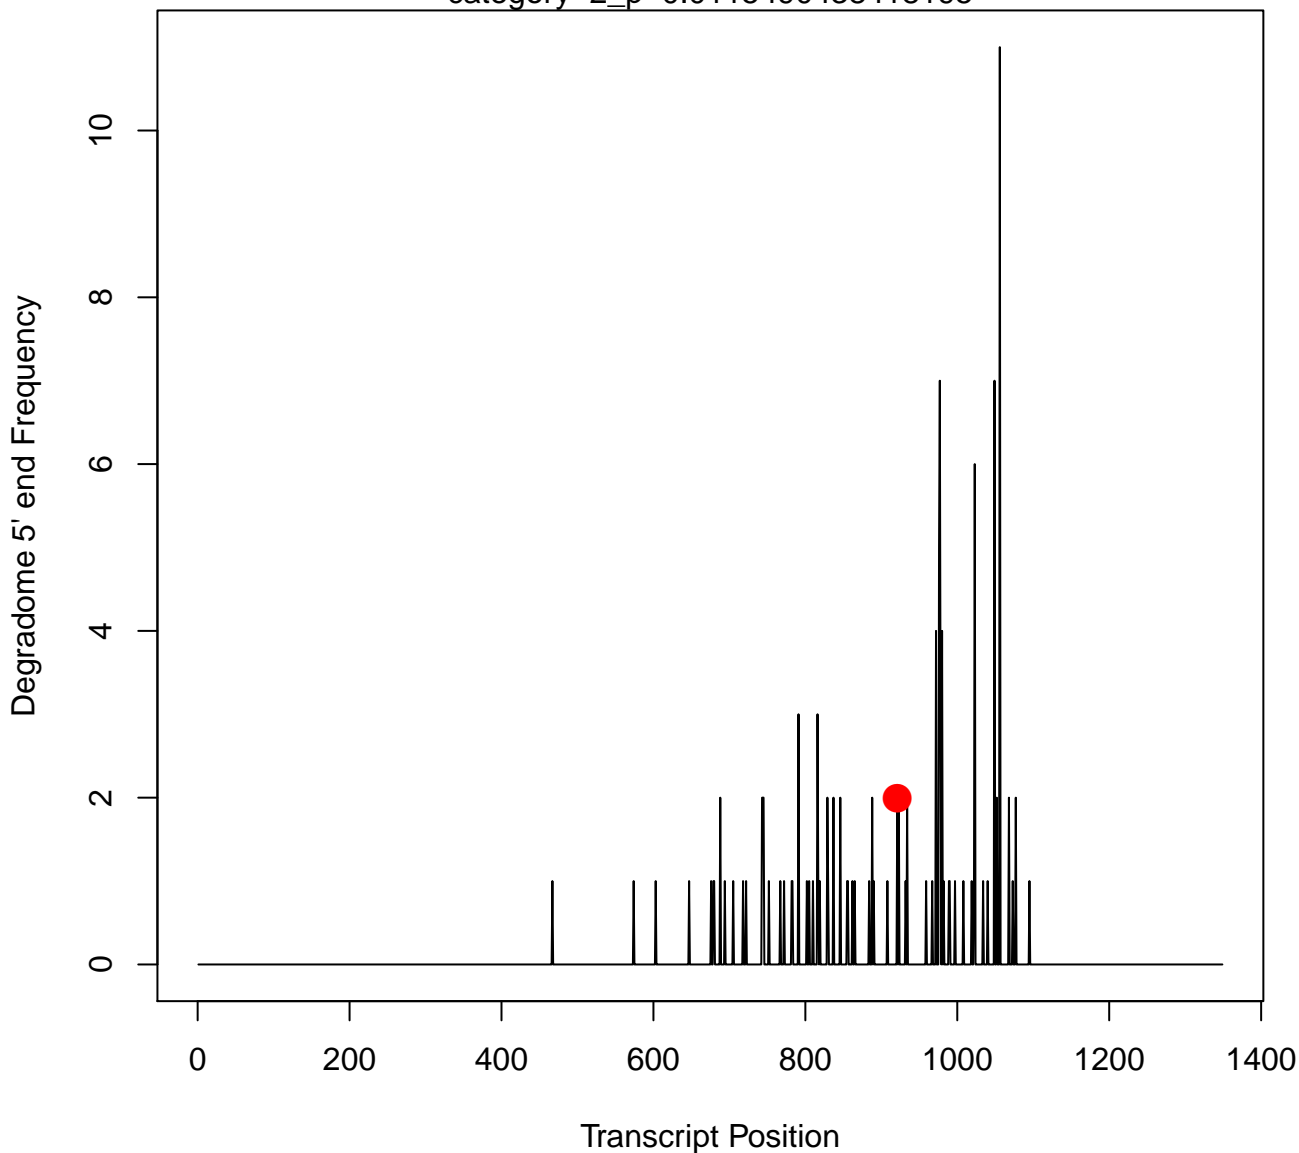

Supplement: s1 [file s1]

**T=Cluster-18410.116422\_Q=novel\_114\_S=1383**

category=1\_p=0.0127087723819956

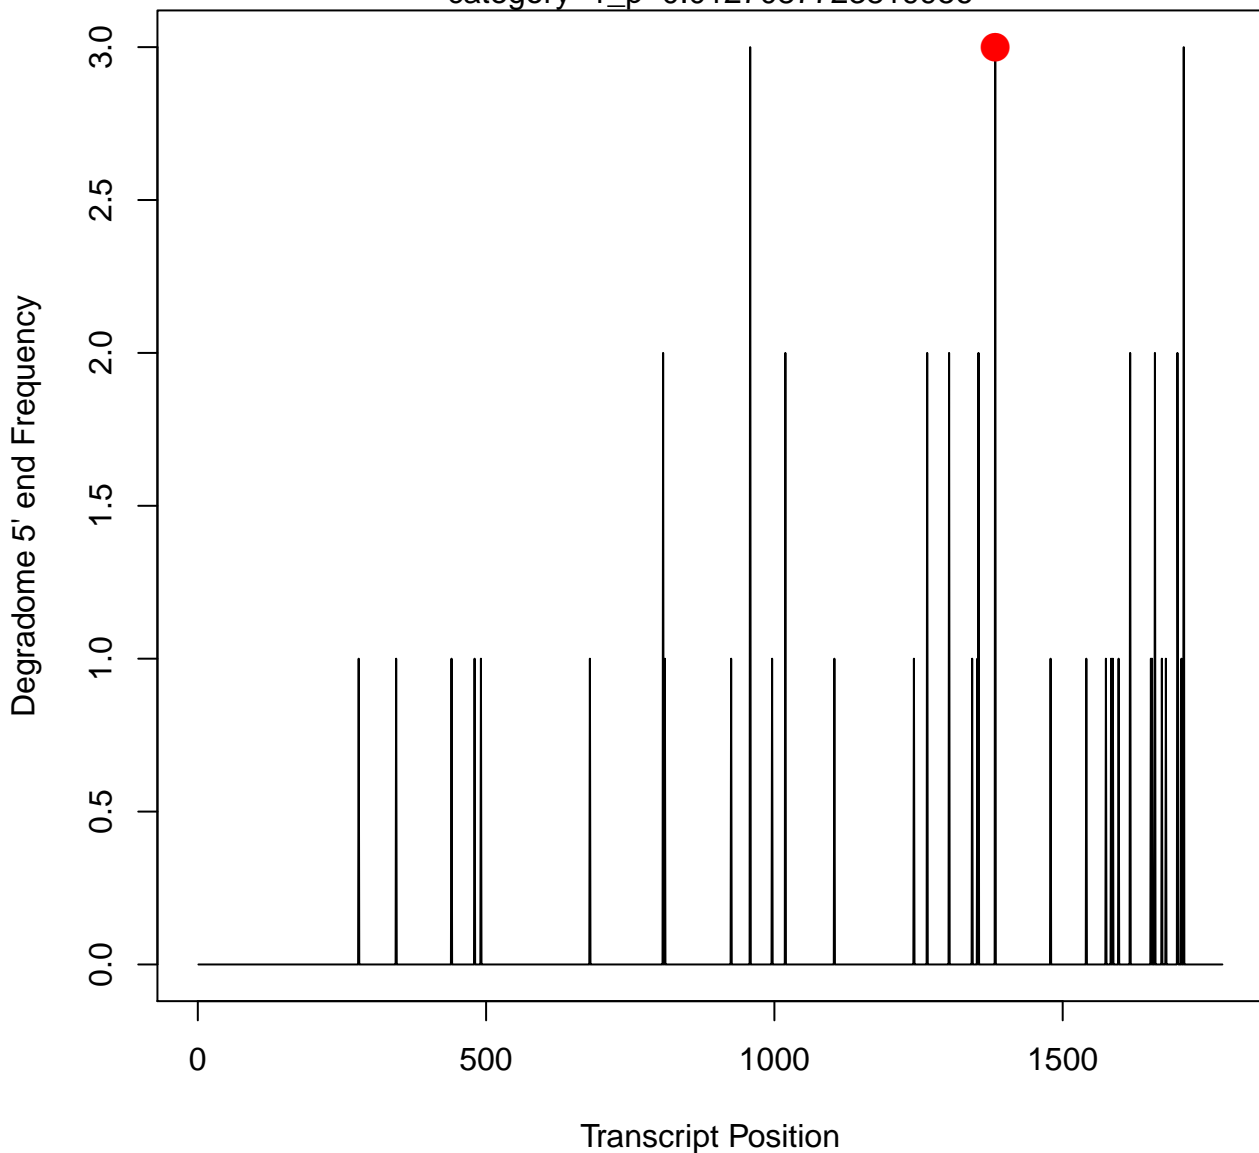

Supplement: s1 [file s1]

**T=Cluster-18410.66816\_Q=novel\_172\_S=37**

category=0\_p=0.00898905591083365

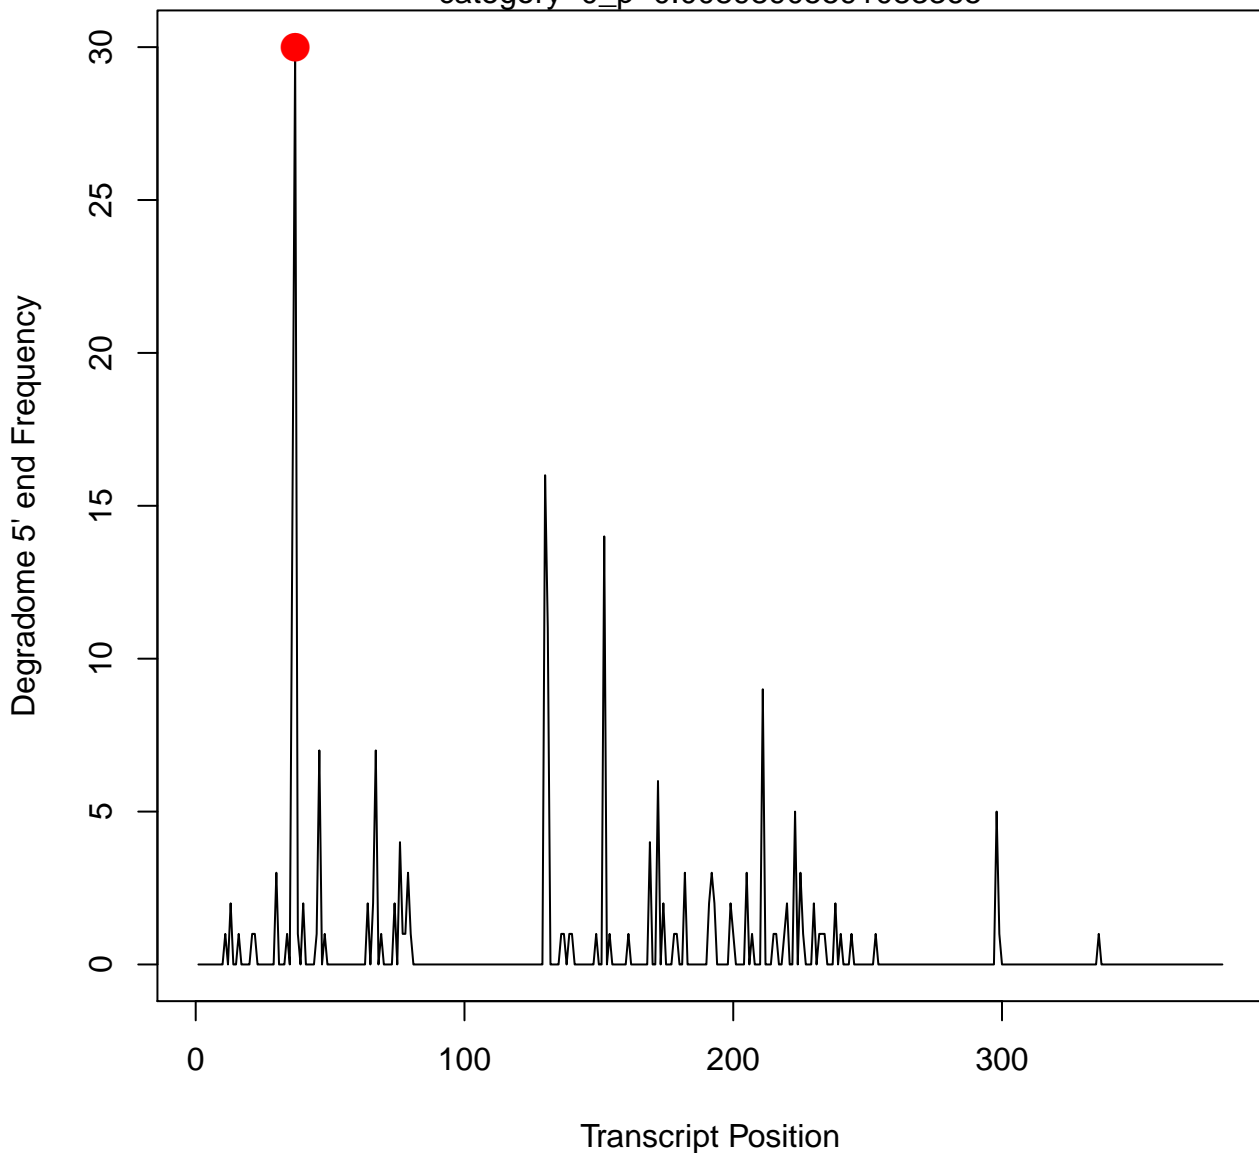

Supplement: s1 [file s1]

**T=Cluster-18410.6695\_Q=novel\_1\_S=989**

category=0\_p=0.0423118874139258

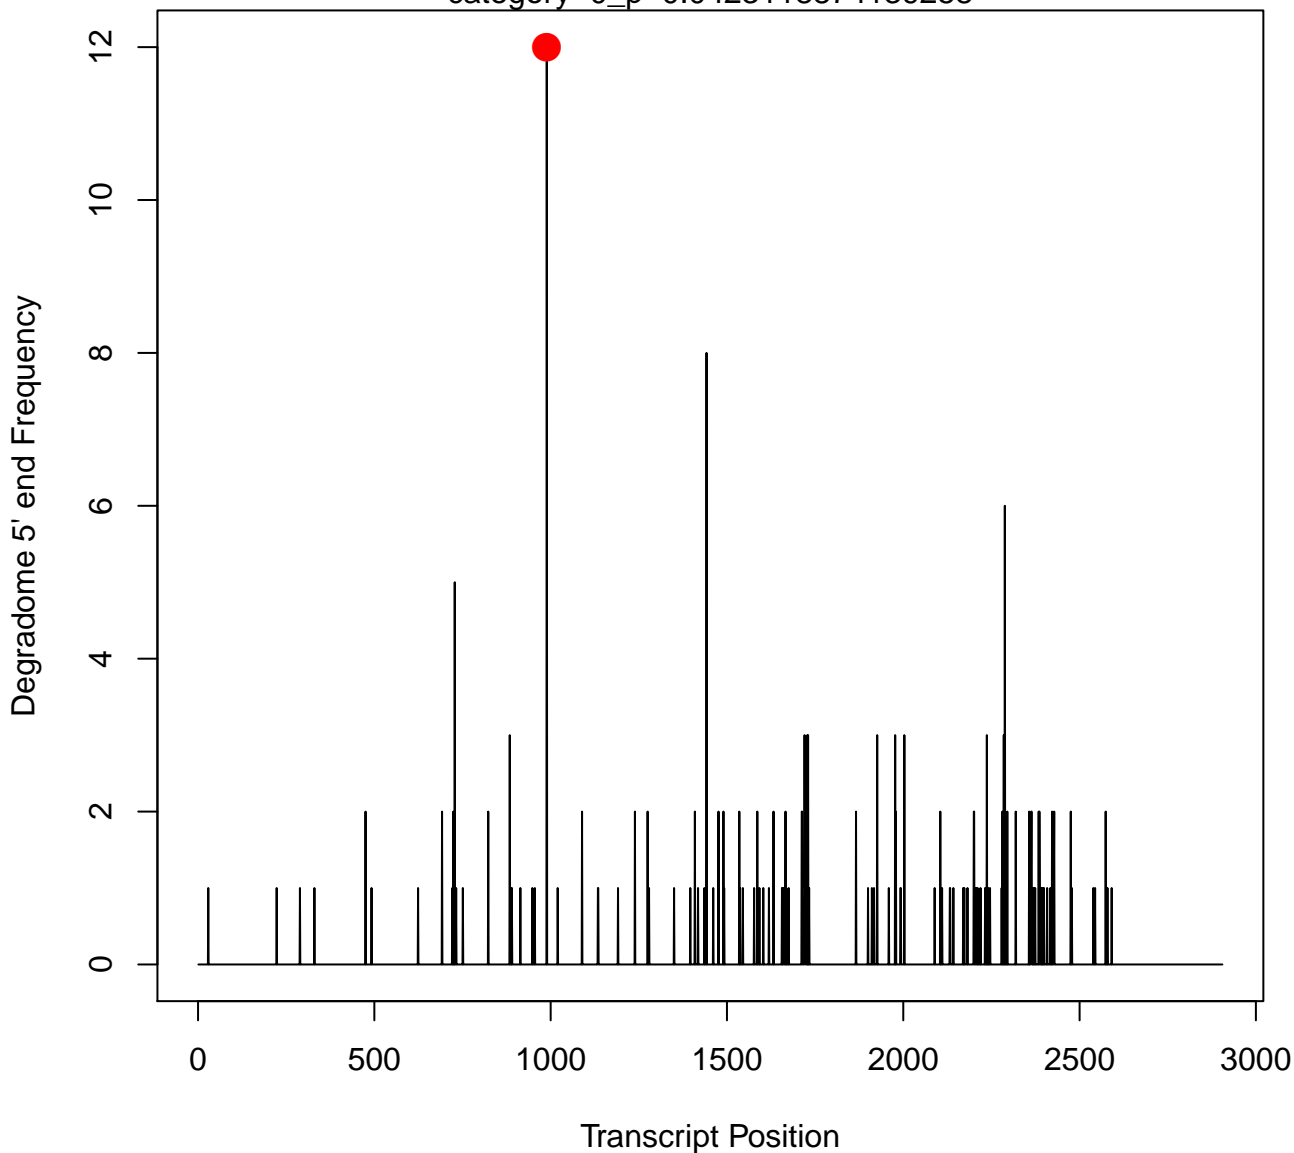

Supplement: s1 [file s1]

**T=Cluster-22304.0\_Q=novel\_47\_S=938**

category=0\_p=0.000547104903662499

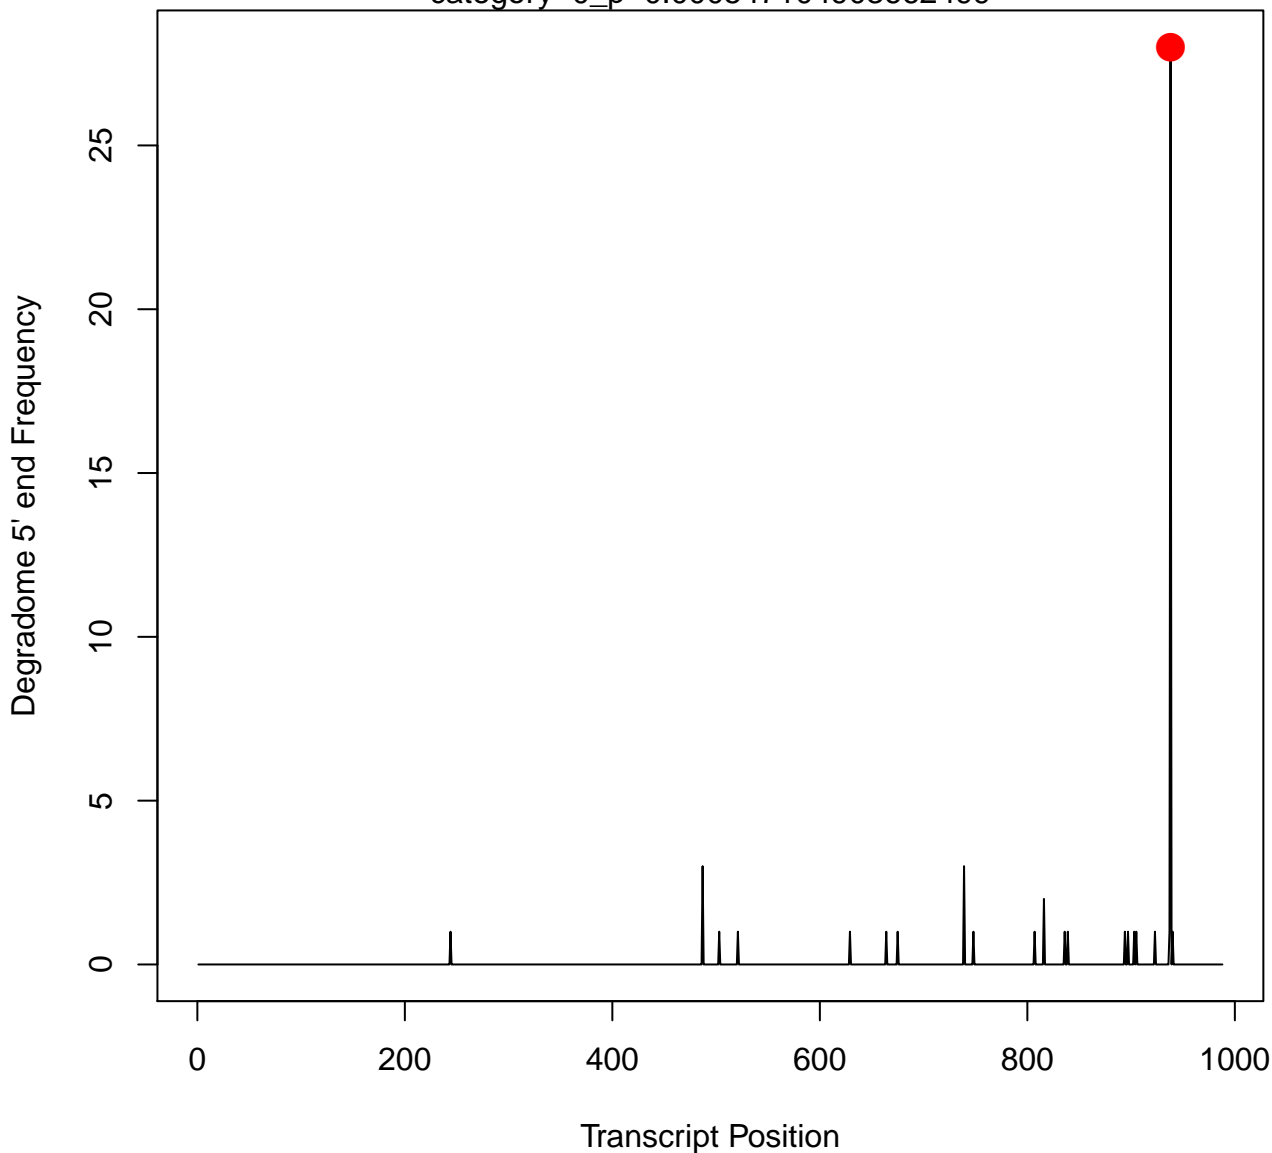

Supplement: s1 [file s1]

**T=Cluster-18410.18028\_Q=novel\_197\_S=126**

category=0\_p=0.00545759909929999

Degradsome 5' end Frequency

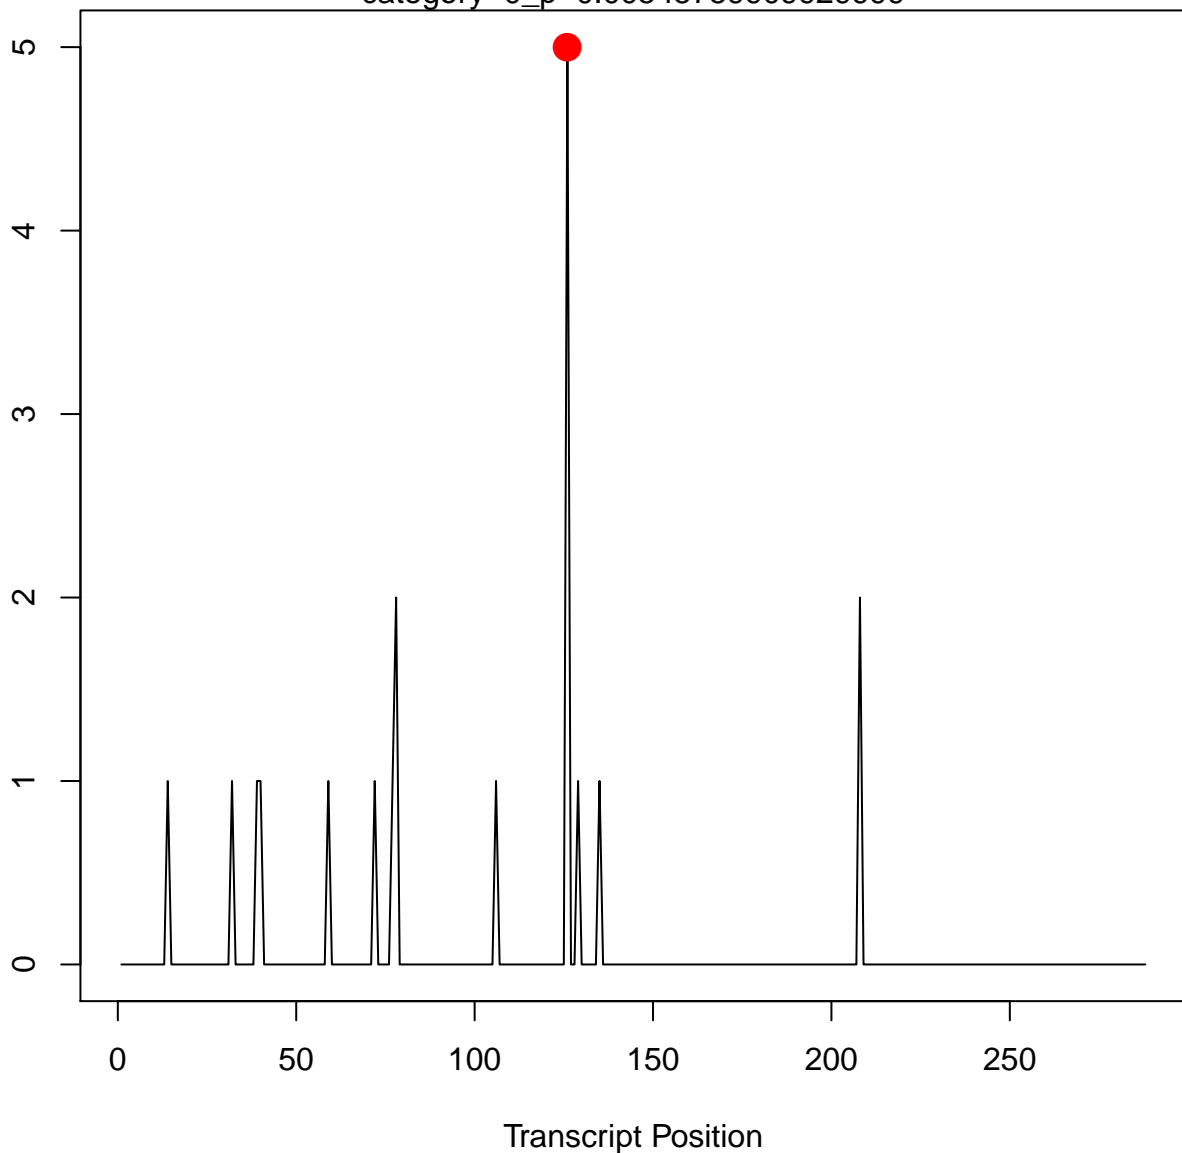

Supplement: s1 [file s1]

**T=Cluster-18410.32929\_Q=pma-miR319\_S=2895**

category=0\_p=0.00491318222172366

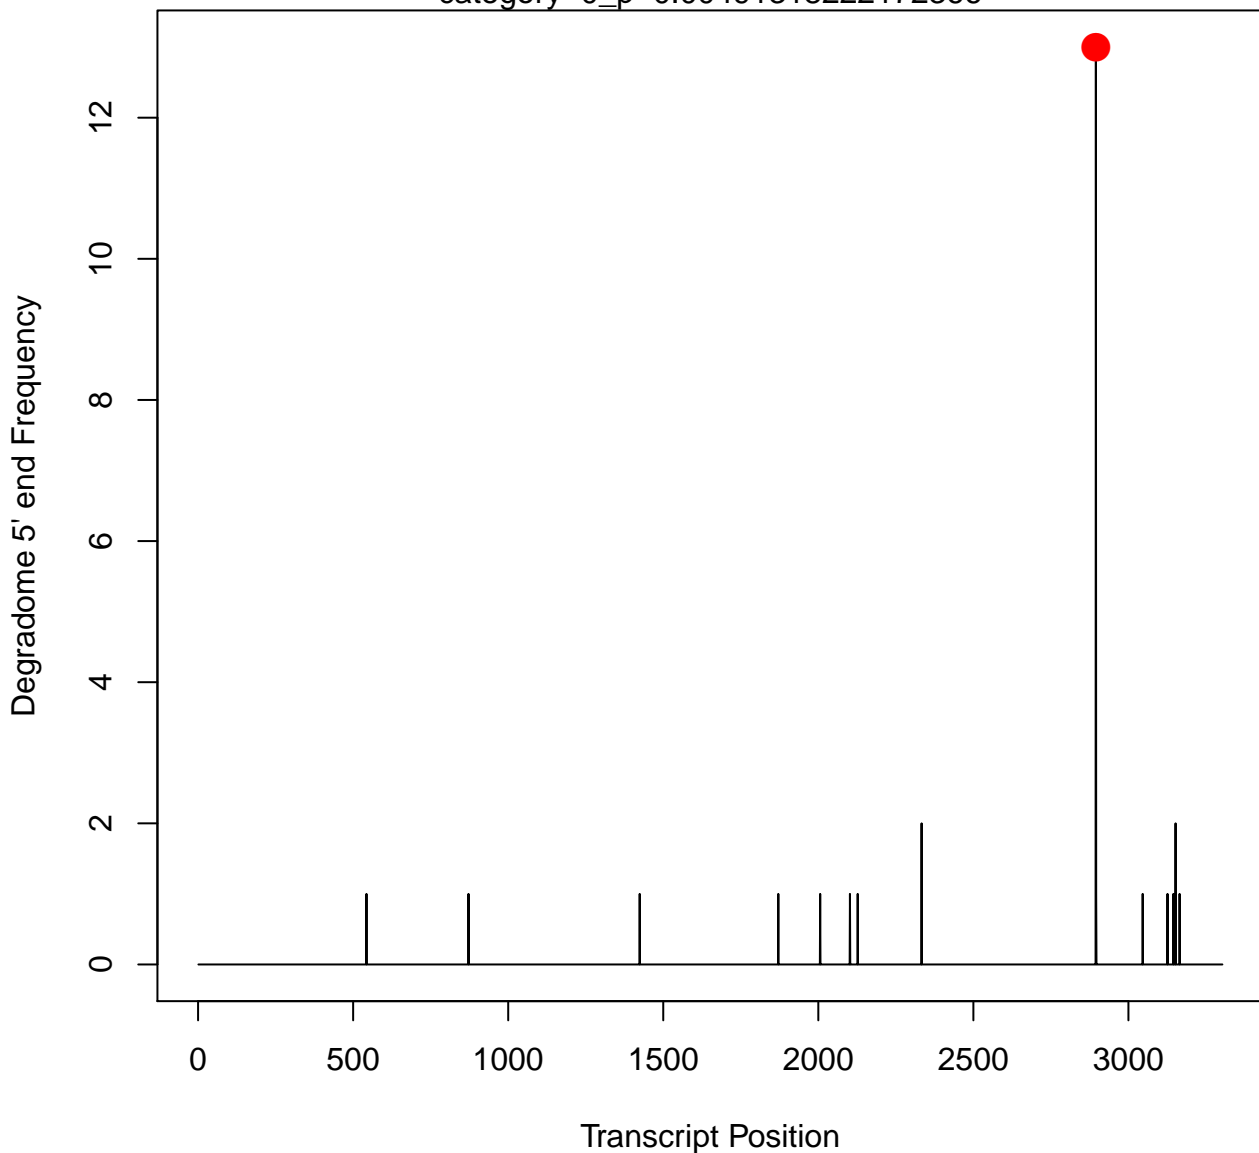

Supplement: s1 [file s1]

**T=Cluster-18410.75902\_Q=novel\_20\_S=1360**

category=0\_p=0.00273253291772324

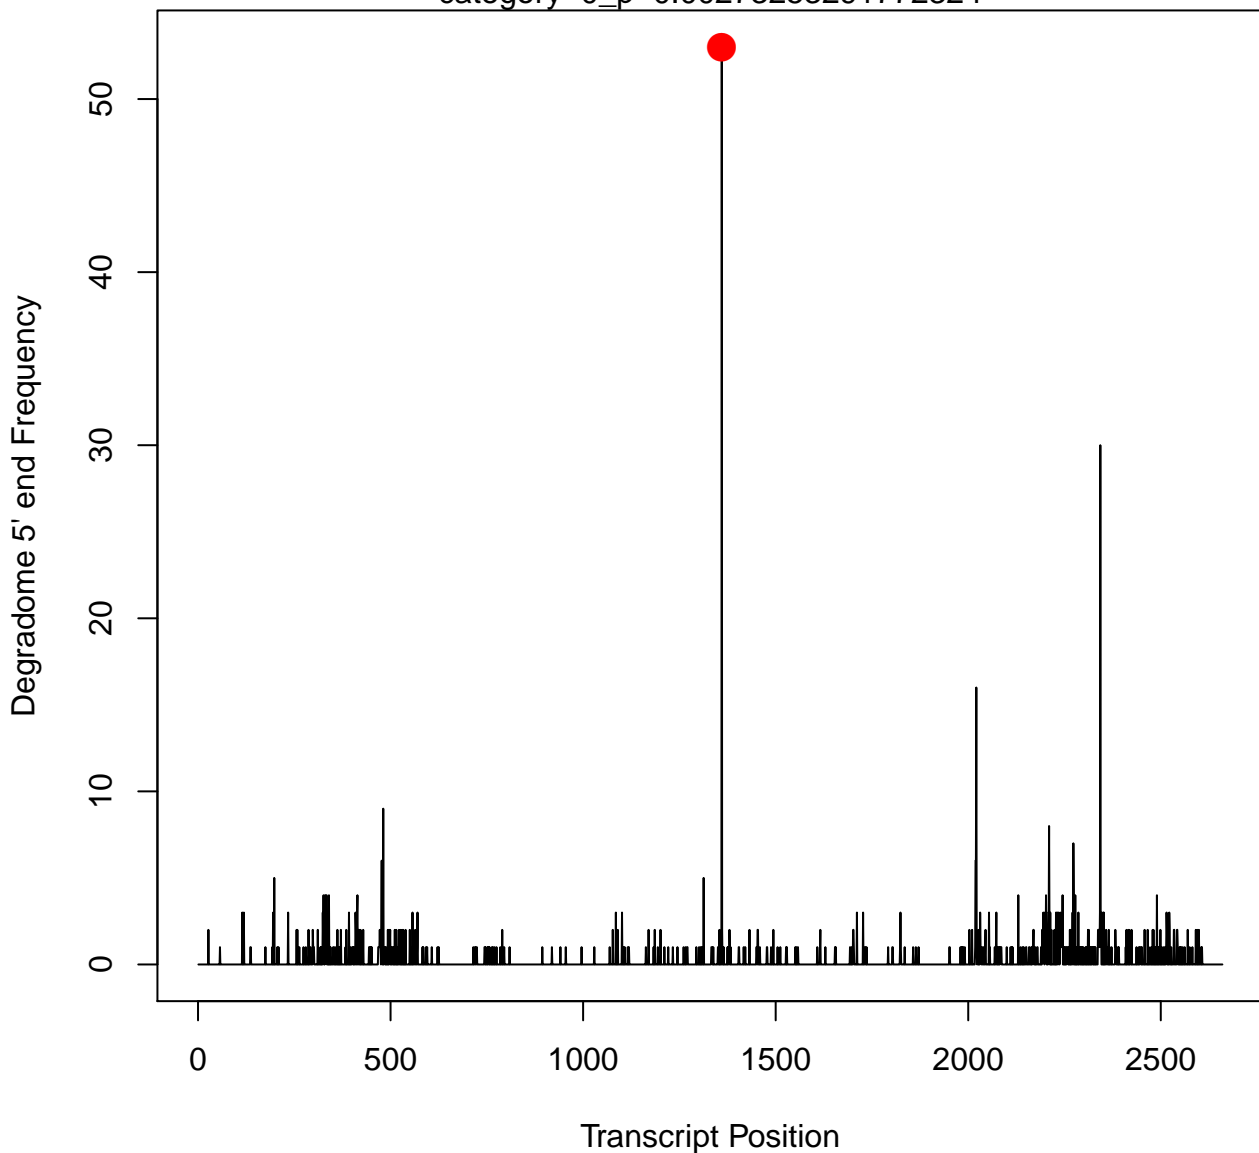

Supplement: s1 [file s1]

**T=Cluster-13722.3\_Q=novel\_74\_S=553**

category=1\_p=0.0185433119647906

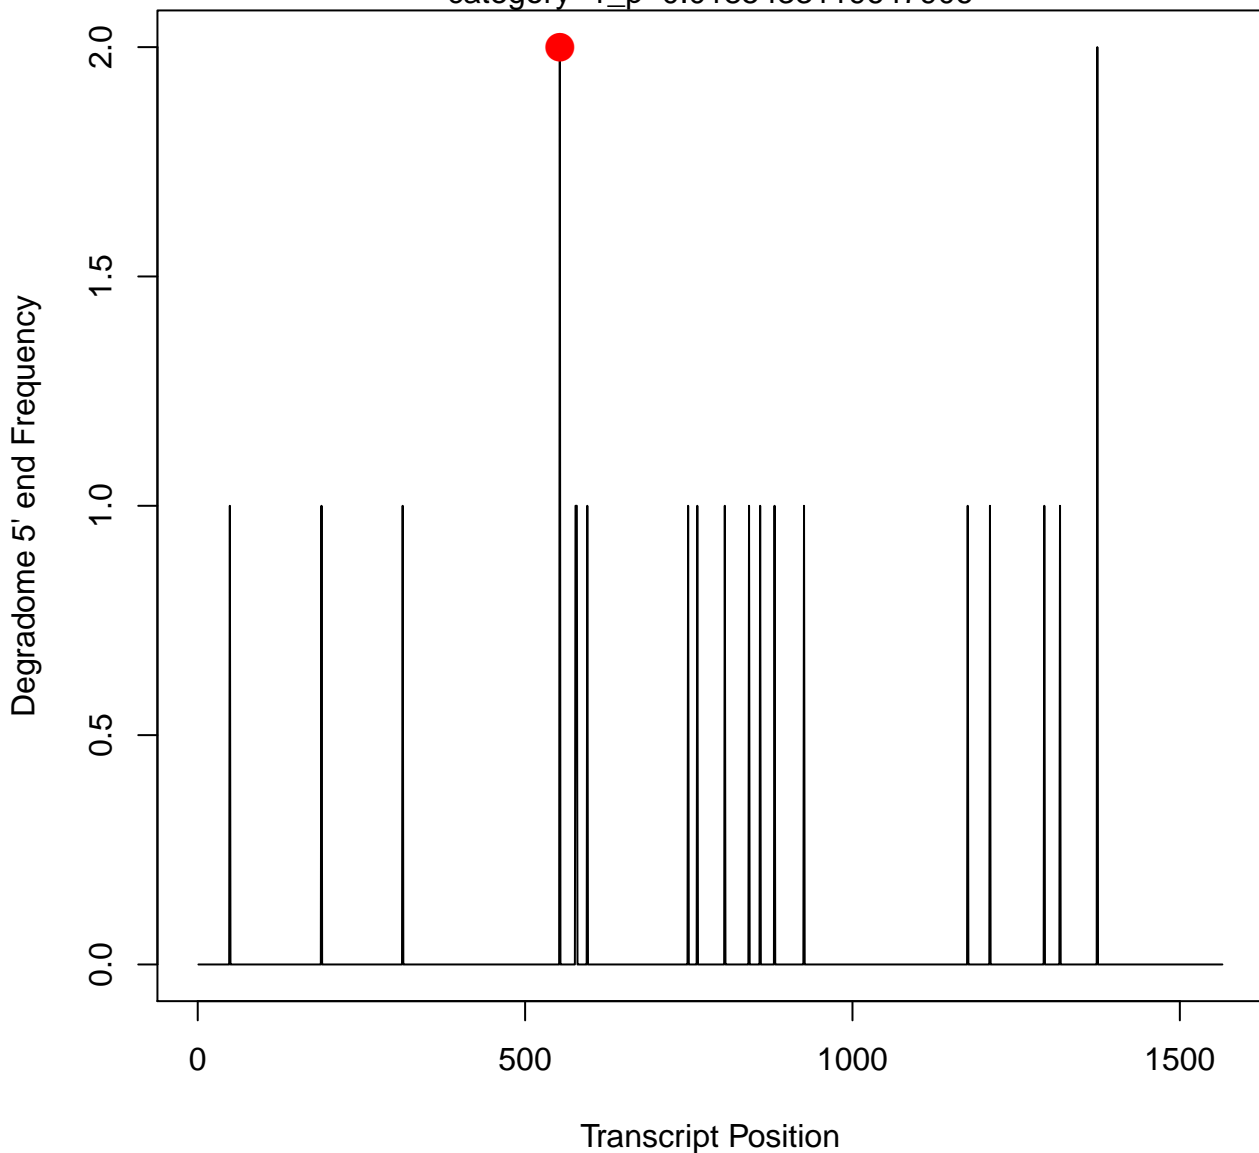

Supplement: s1 [file s1]

**T=Cluster-18410.46129\_Q=novel\_42\_S=103**

category=0\_p=0.00436846732795781

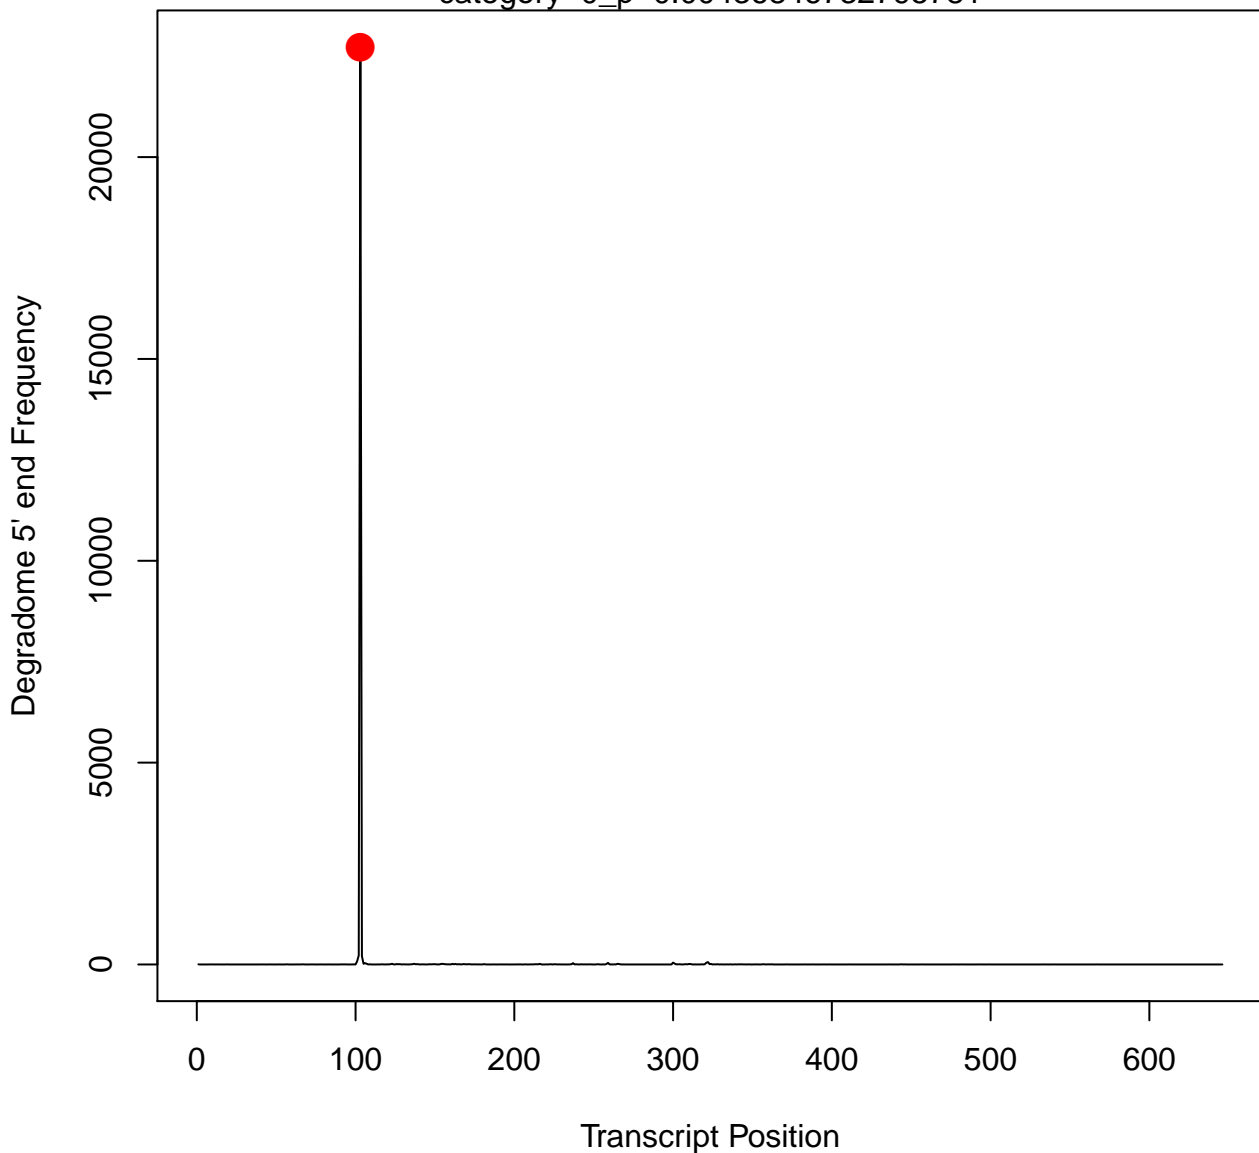

Supplement: s1 [file s1]

**T=Cluster-18410.96111\_Q=novel\_21\_S=49**

category=0\_p=0.00327814283922701

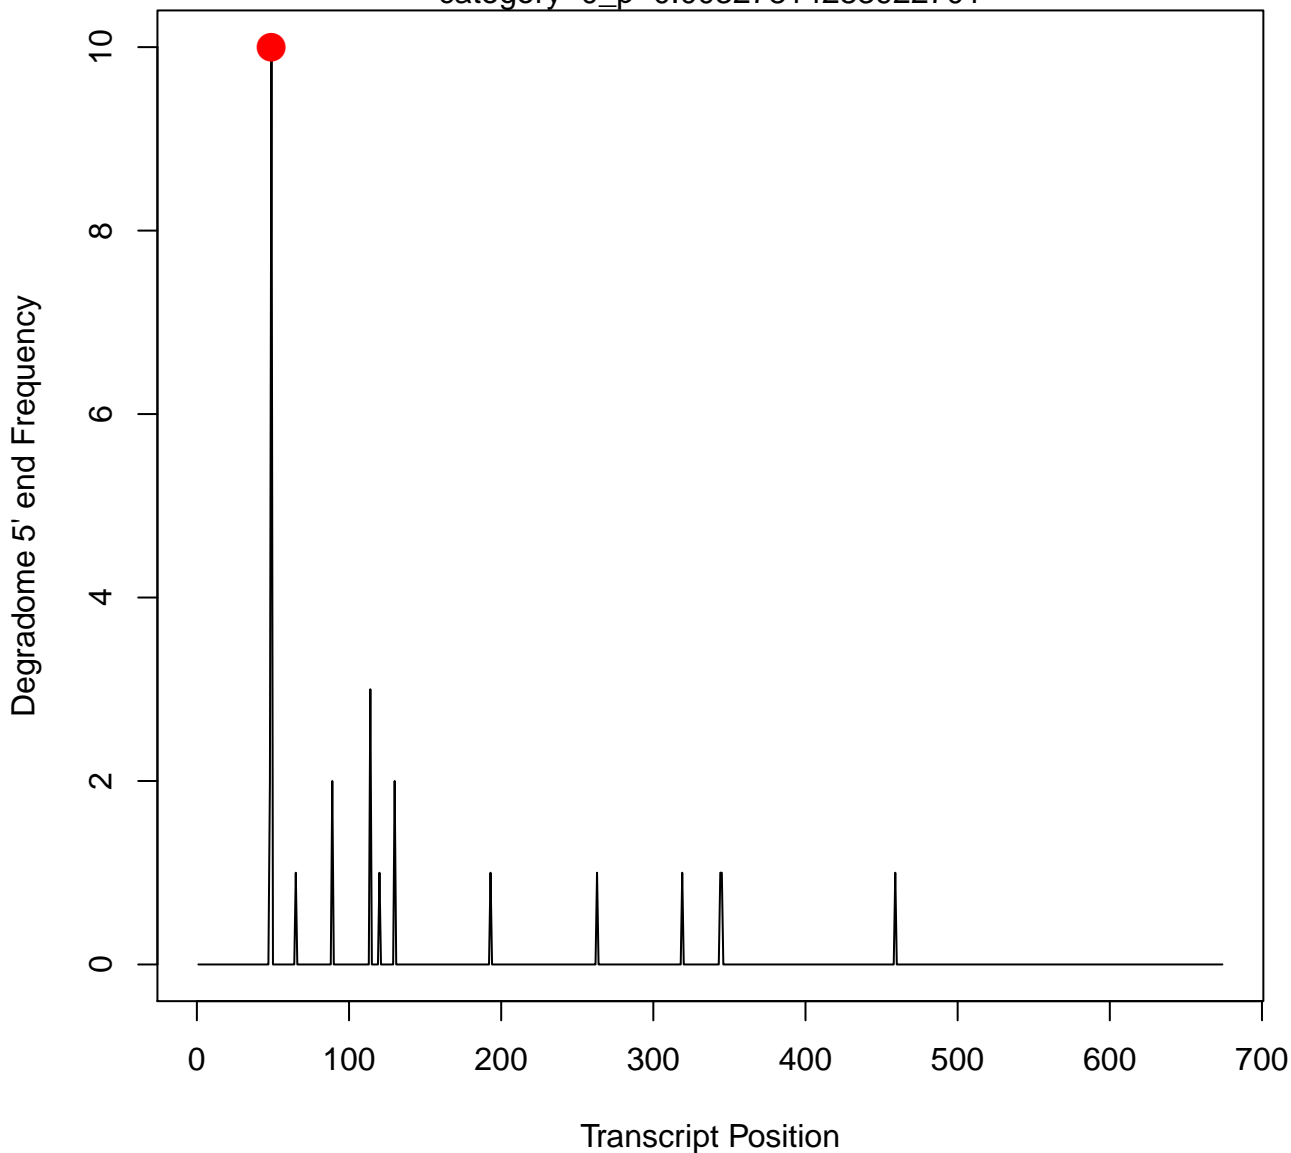

Supplement: s1 [file s1]

**T=Cluster-18410.25725\_Q=novel\_15\_S=300**

category=0\_p=0.00218662432695249

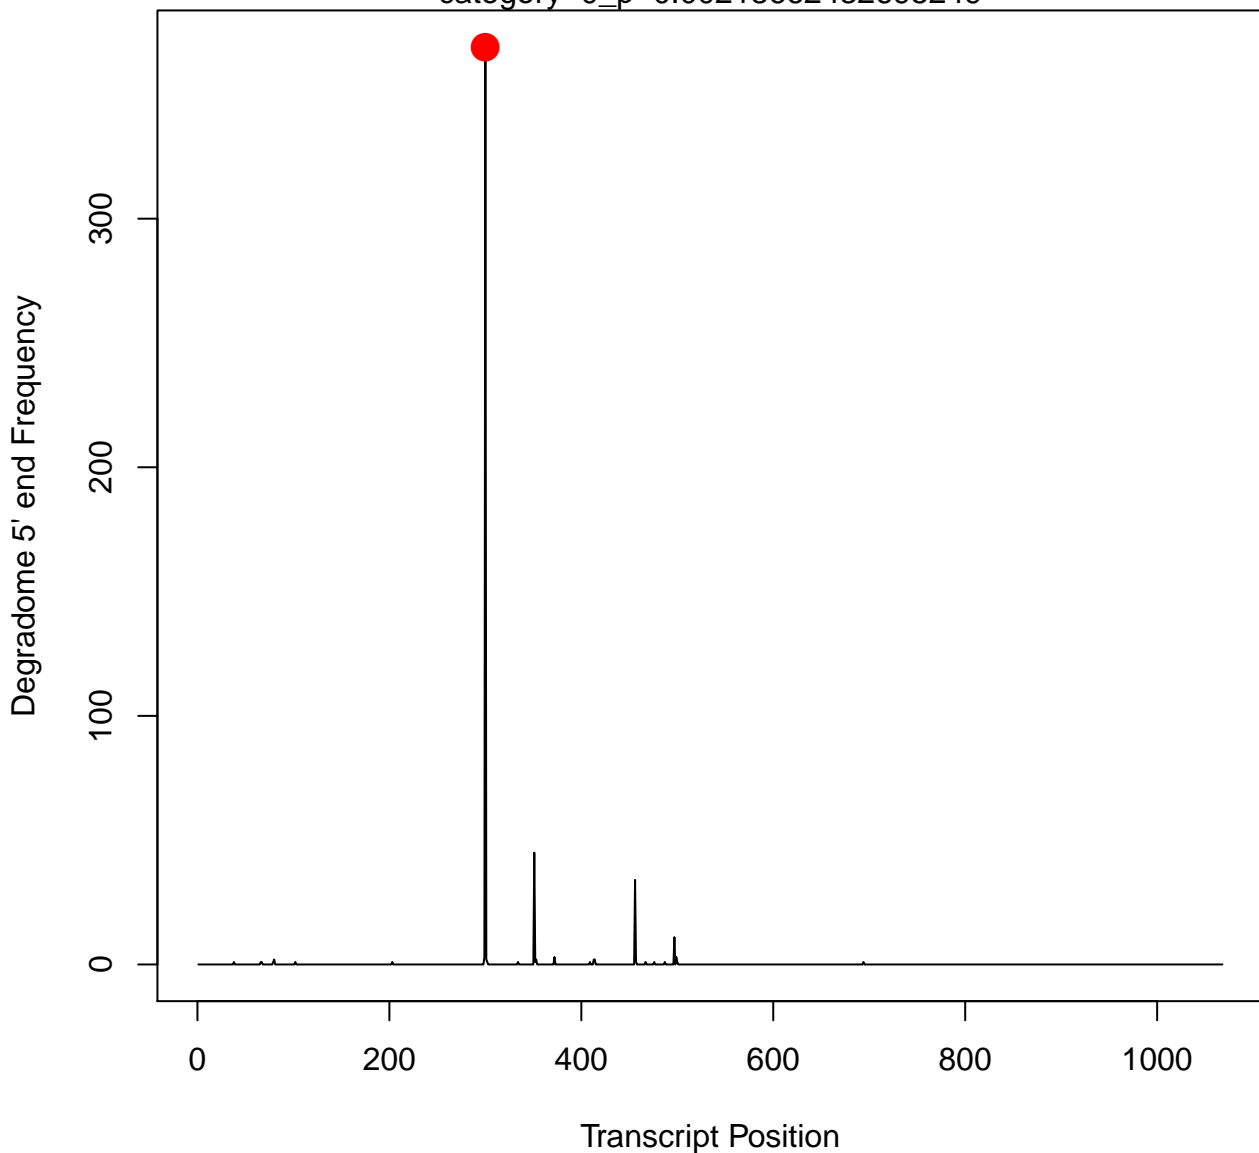

Supplement: s1 [file s1]

**T=Cluster-18410.39168\_Q=novel\_46\_S=654**

category=0\_p=0.00164041690342198

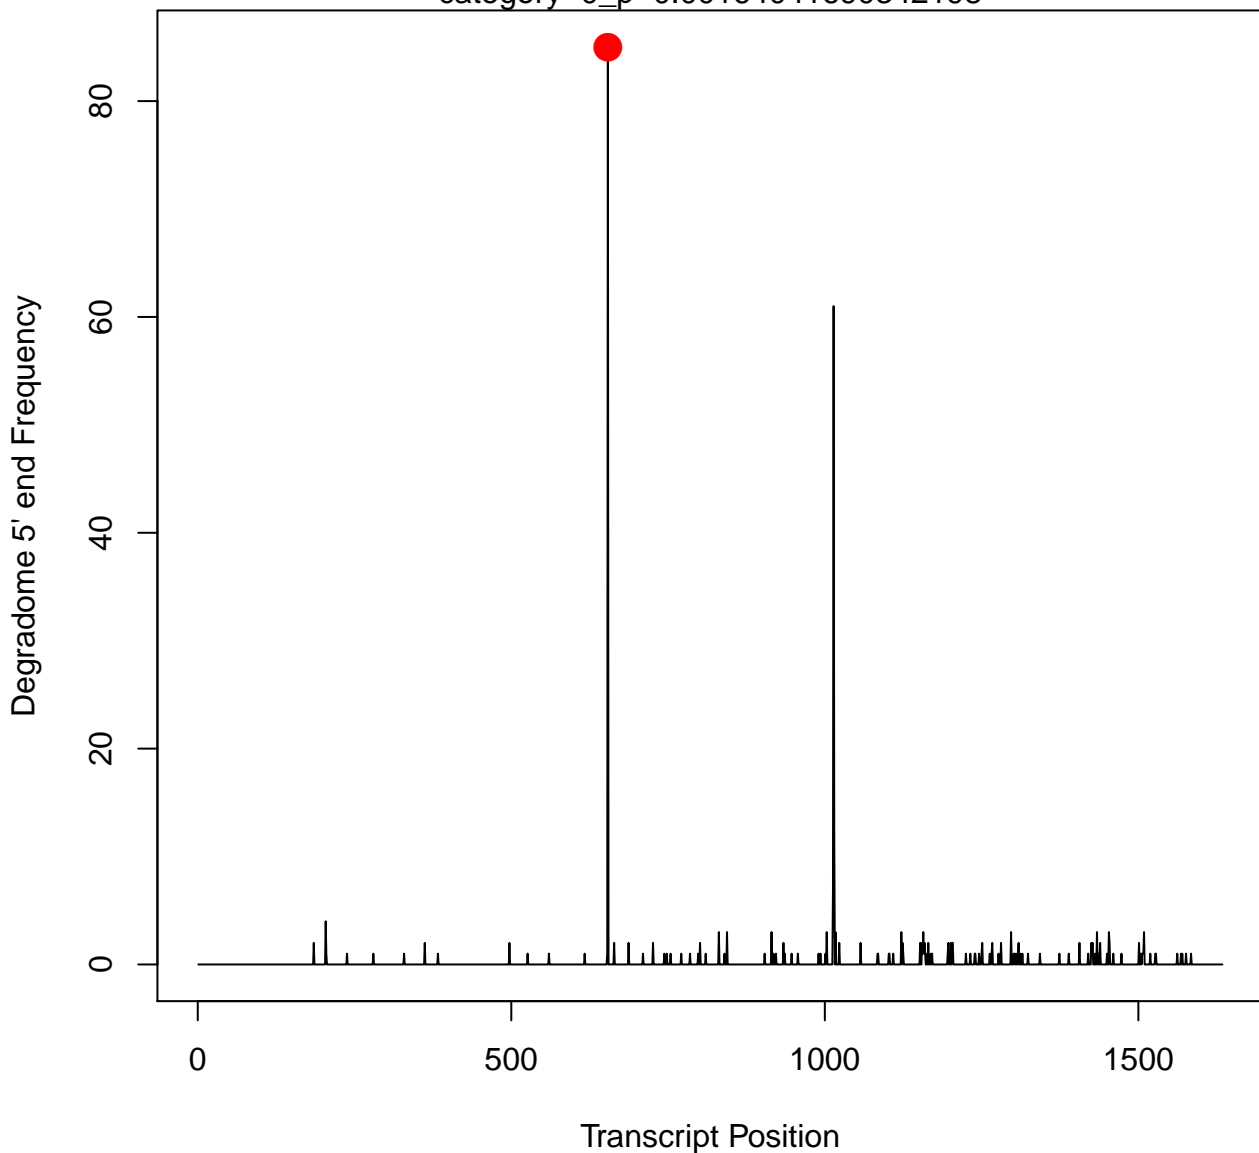

Supplement: s1 [file s1]

**T=Cluster-18410.90808\_Q=novel\_94\_S=405**

category=2\_p=0.0673240995462872

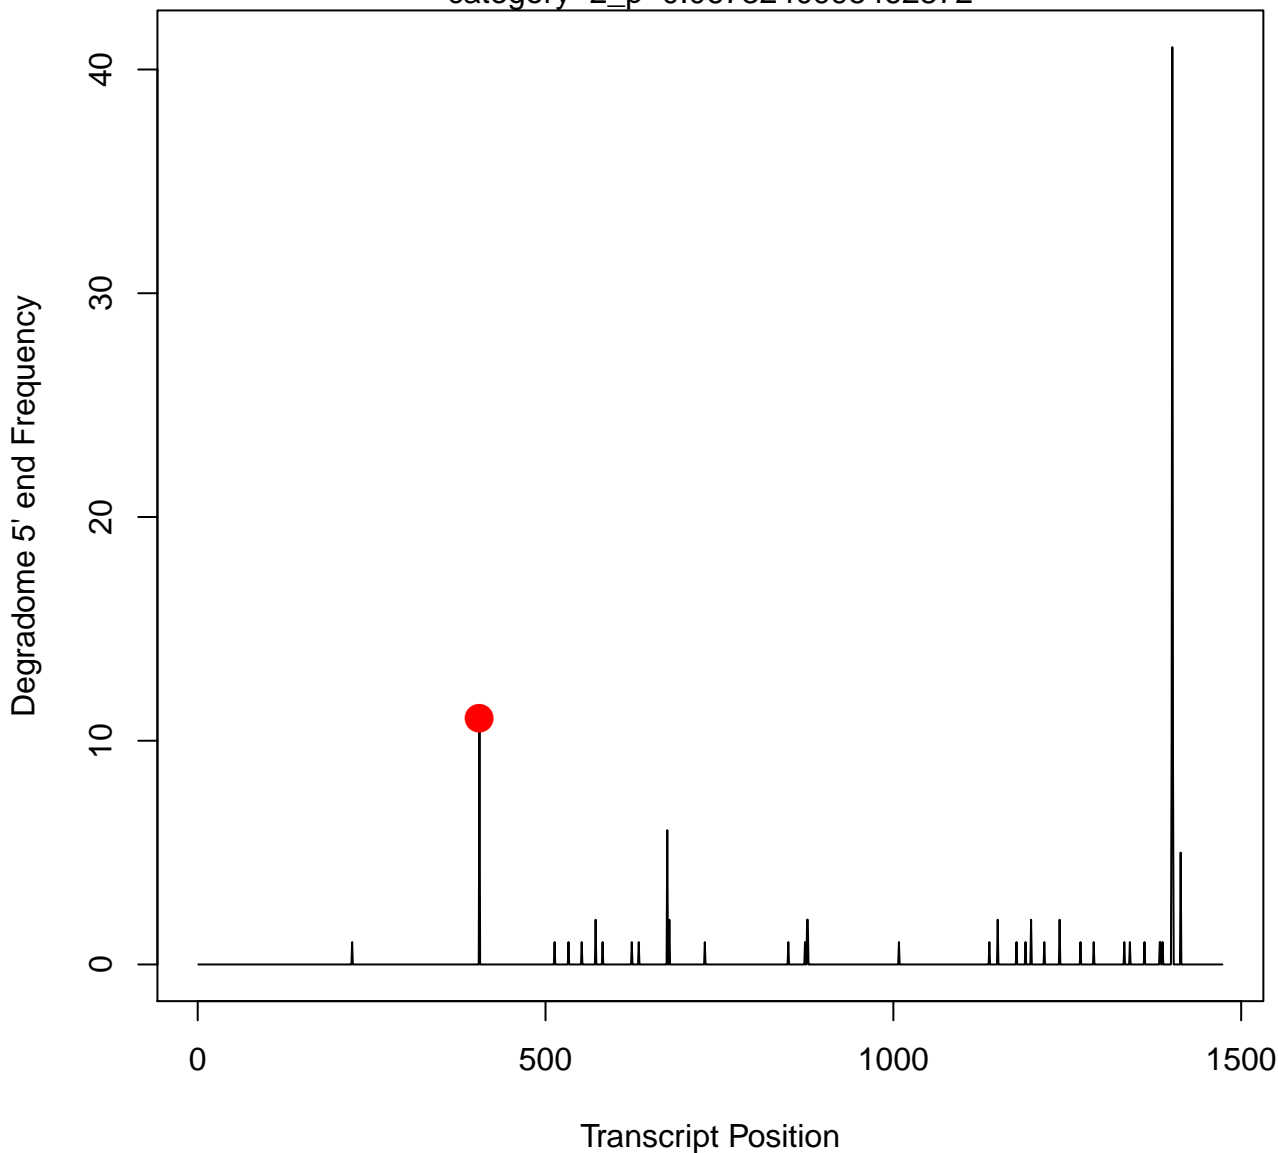

Supplement: s1 [file s1]

**T=Cluster-18410.39076\_Q=pma-miR951\_S=430**

category=0\_p=0.00109391048354923

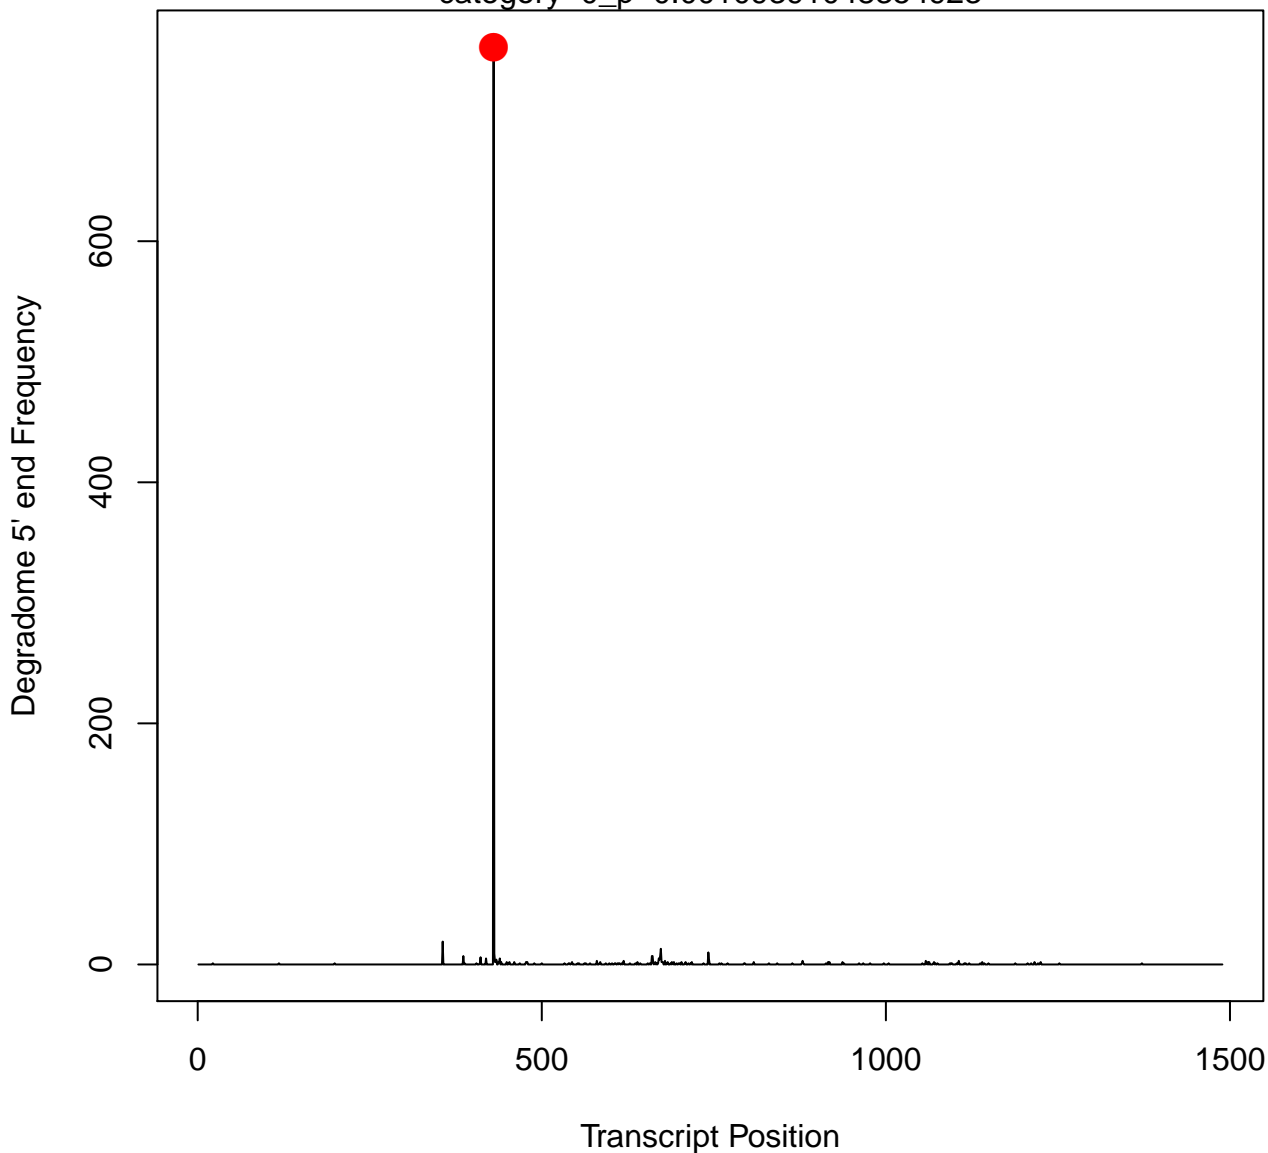

Supplement: s1 [file s1]

**T=Cluster-18410.60862\_Q=novel\_148\_S=310**

category=0\_p=0.0449288017064794

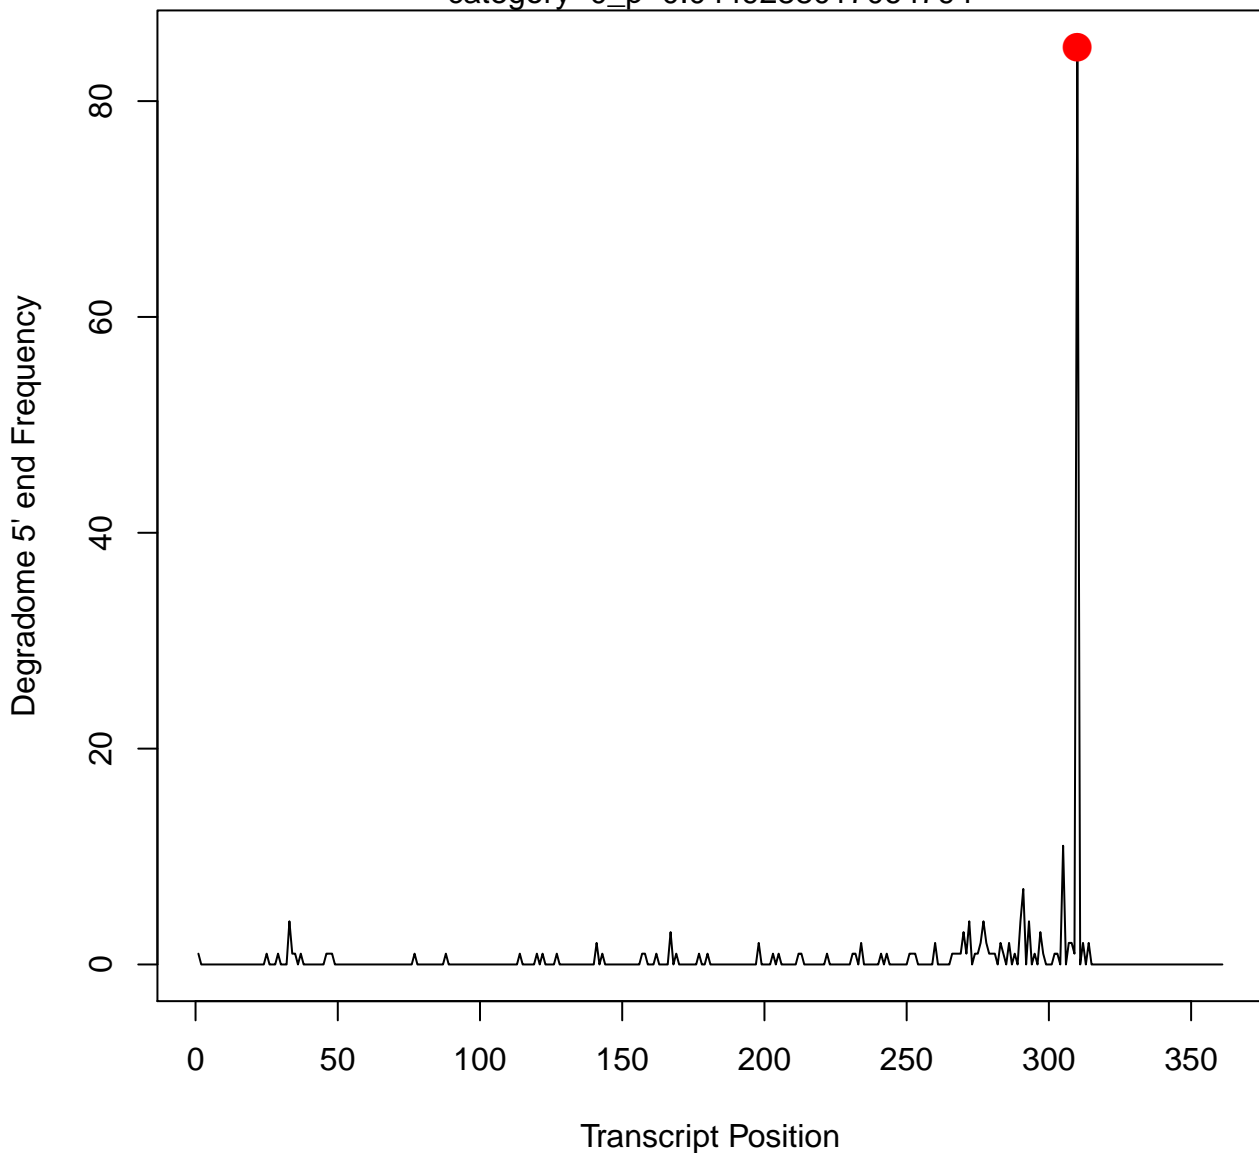

Supplement: s1 [file s1]

**T=Cluster-18410.45640\_Q=novel\_34\_S=481**

category=0\_p=0.0133182548417358

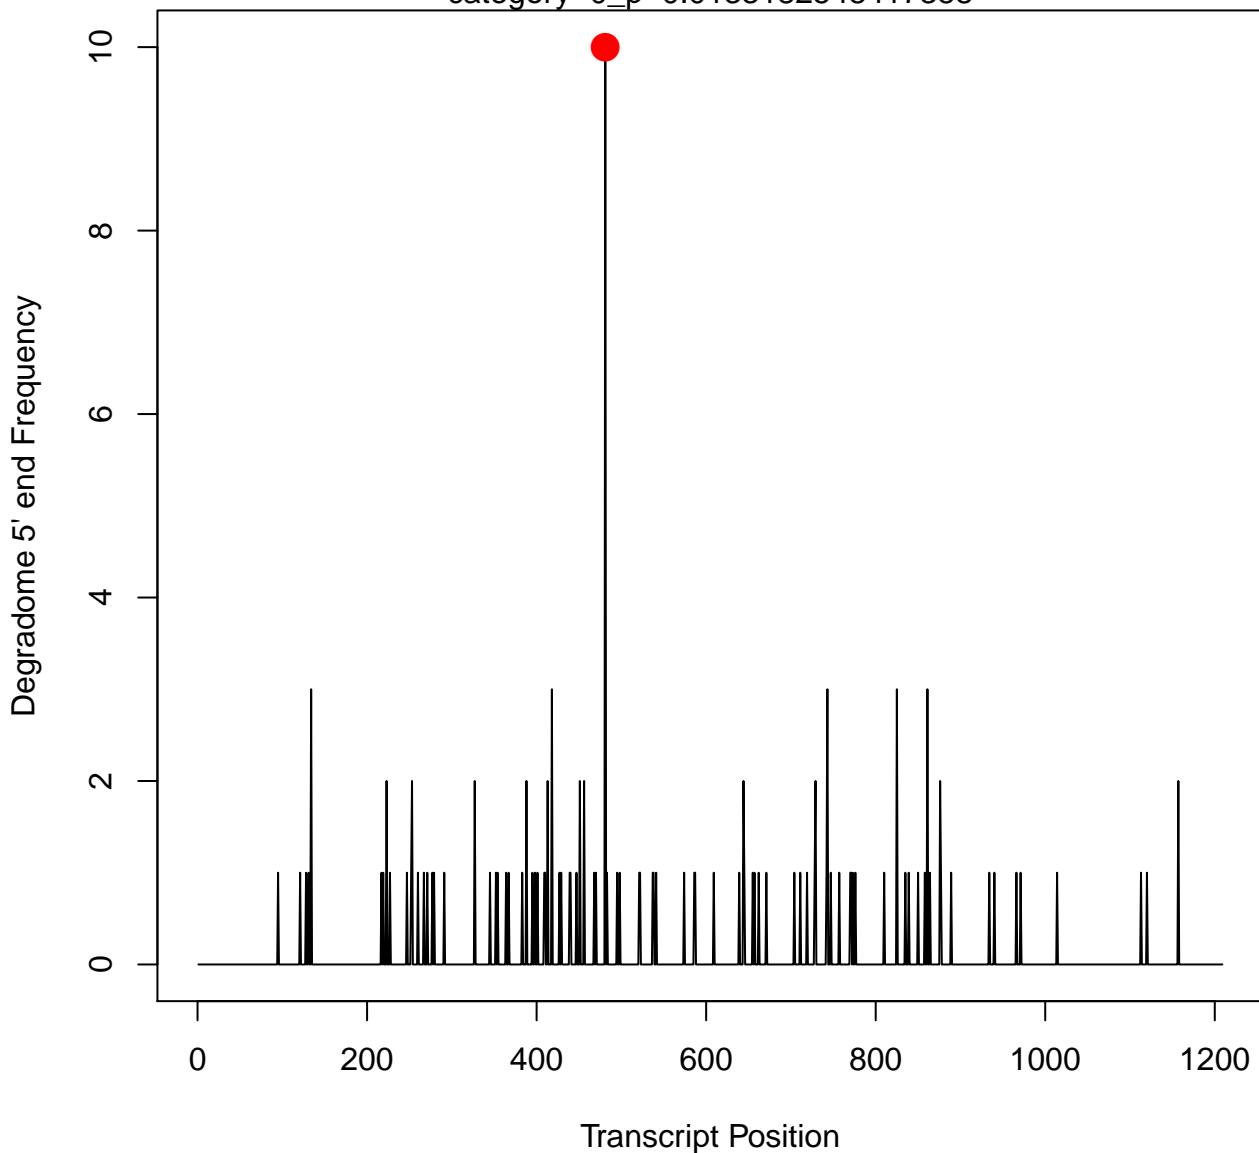

Supplement: s1 [file s1]

**T=Cluster-18410.65471\_Q=novel\_6\_S=213**

category=0\_p=0.000547104903662499

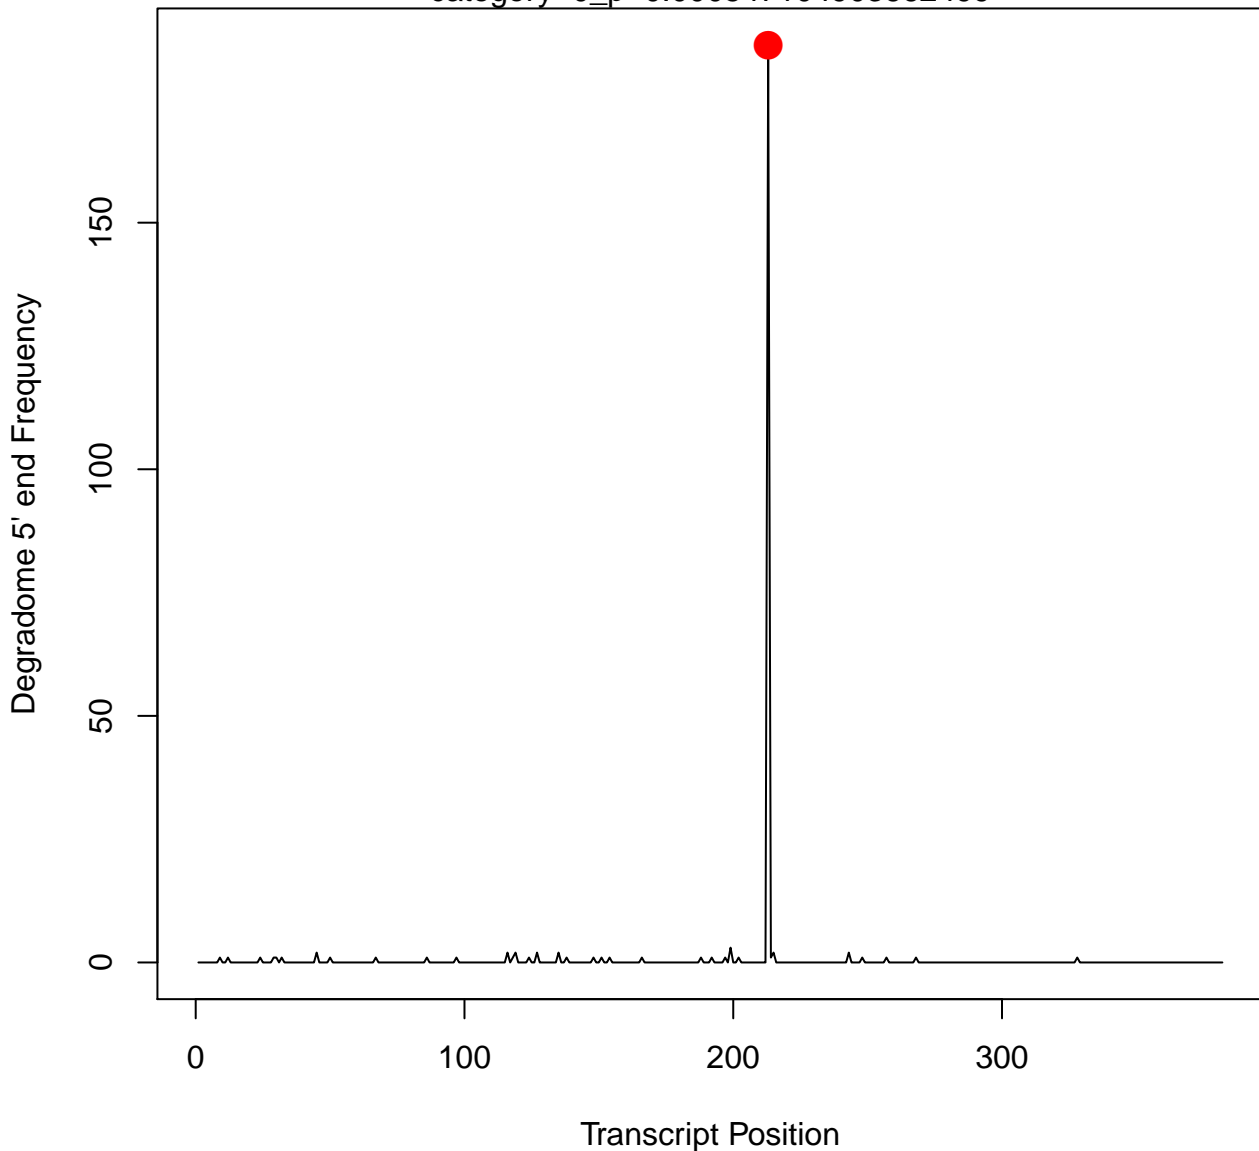

Supplement: s1 [file s1]

**T=Cluster-18410.113382\_Q=novel\_168\_S=245**

category=2\_p=0.0229647072699788

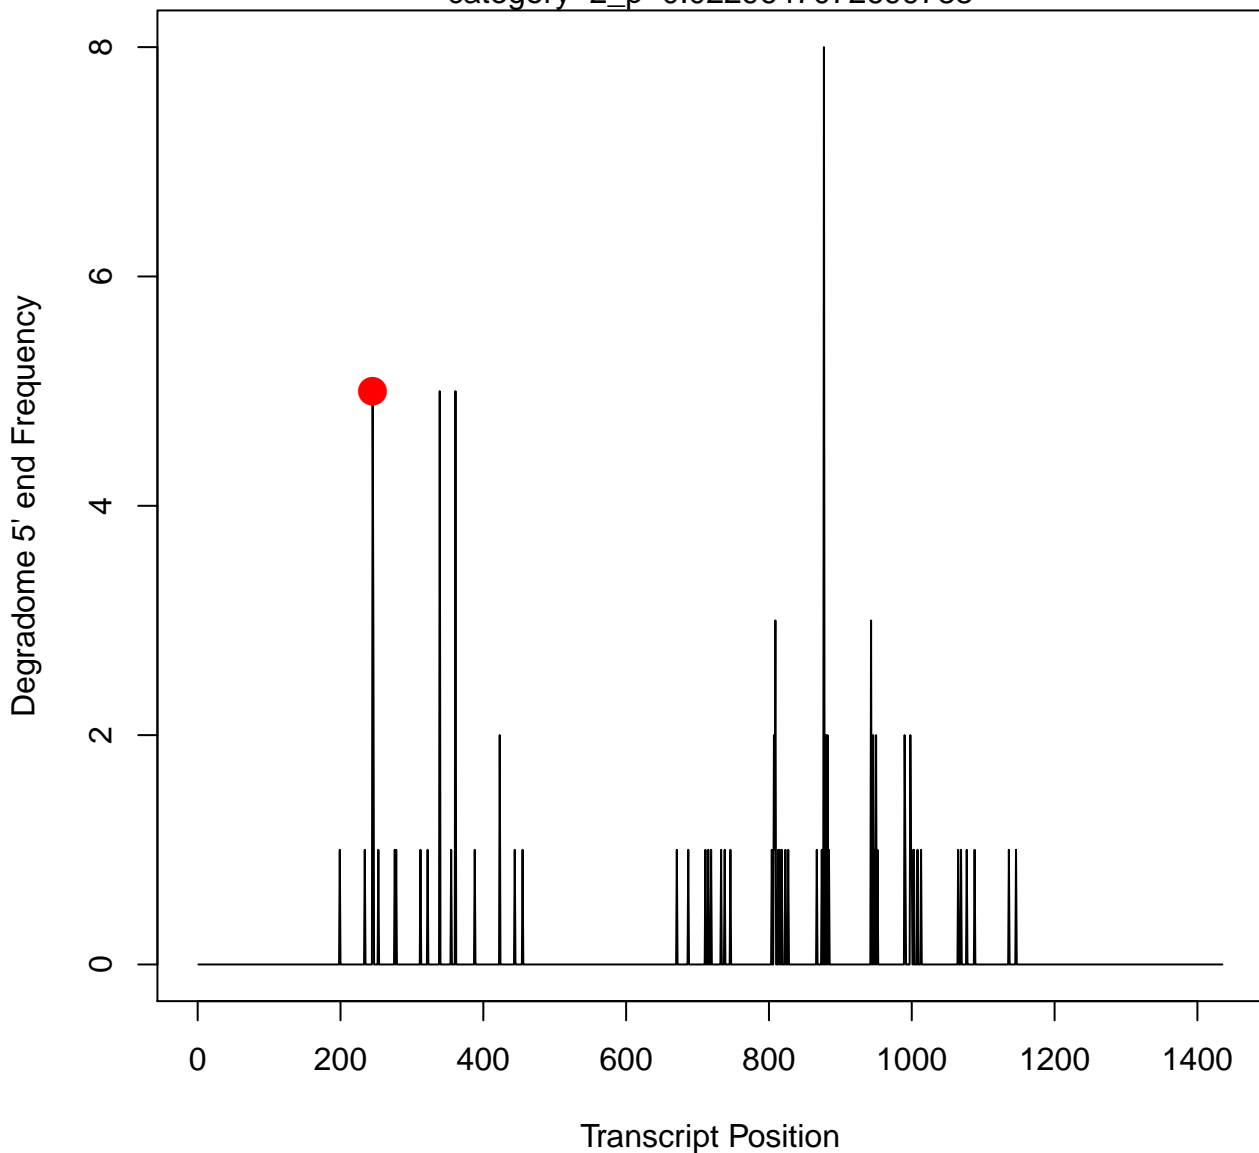

Supplement: s1 [file s1]

**T=Cluster-410.0\_Q=novel\_83\_S=587**

category=1\_p=0.043032527618788

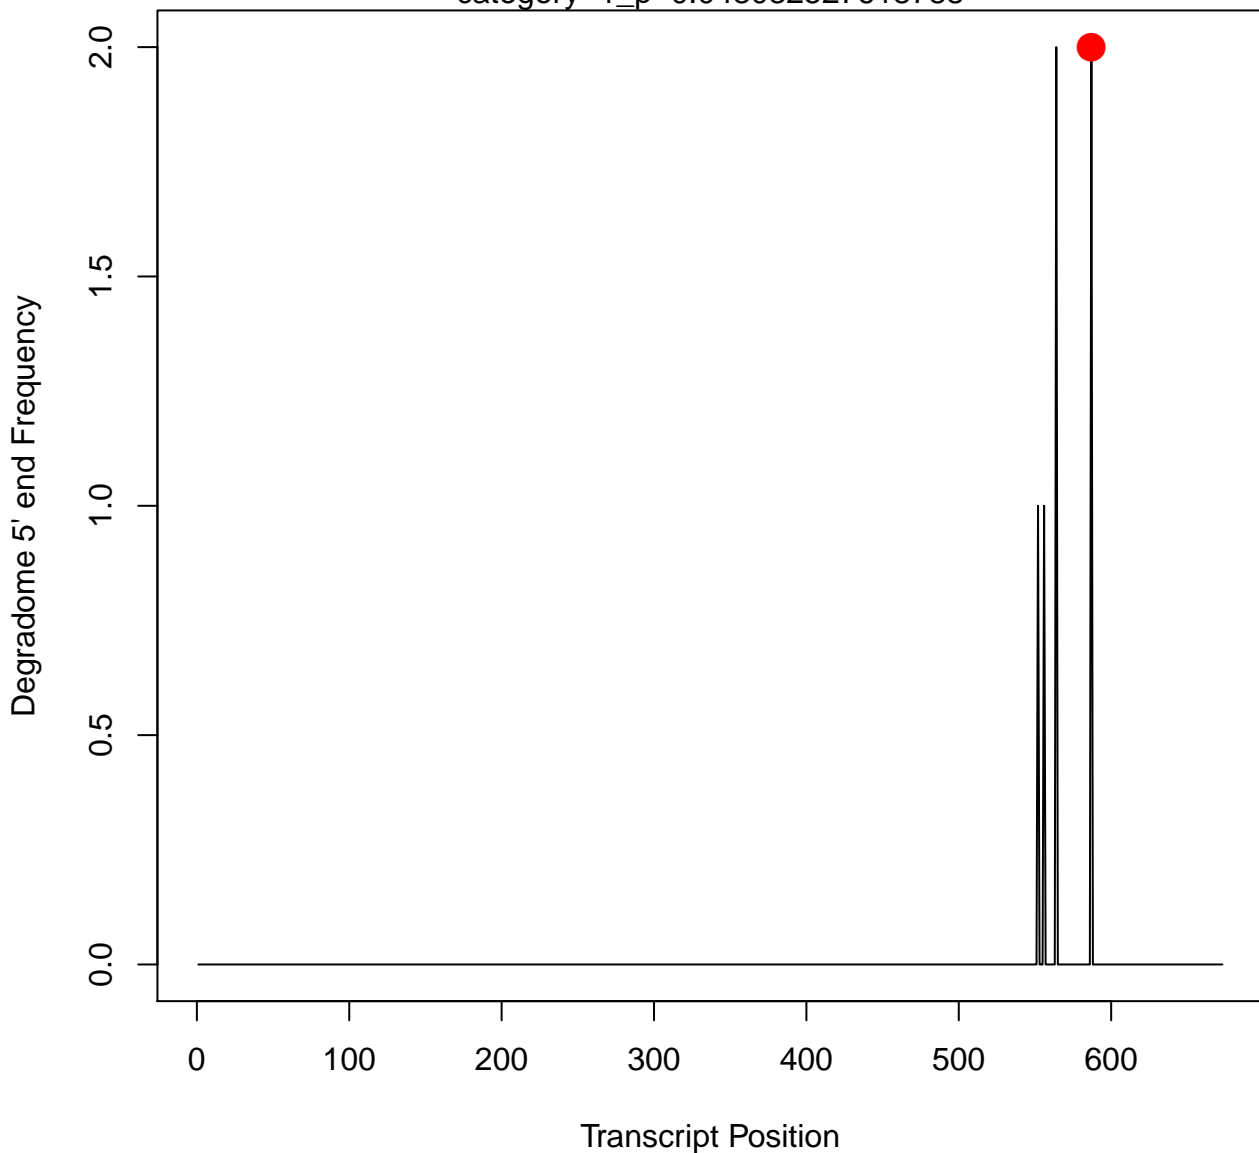

Supplement: s1 [file s1]

**T=Cluster-18410.32927\_Q=pma-miR319\_S=2304**

category=0\_p=0.0040959980740275

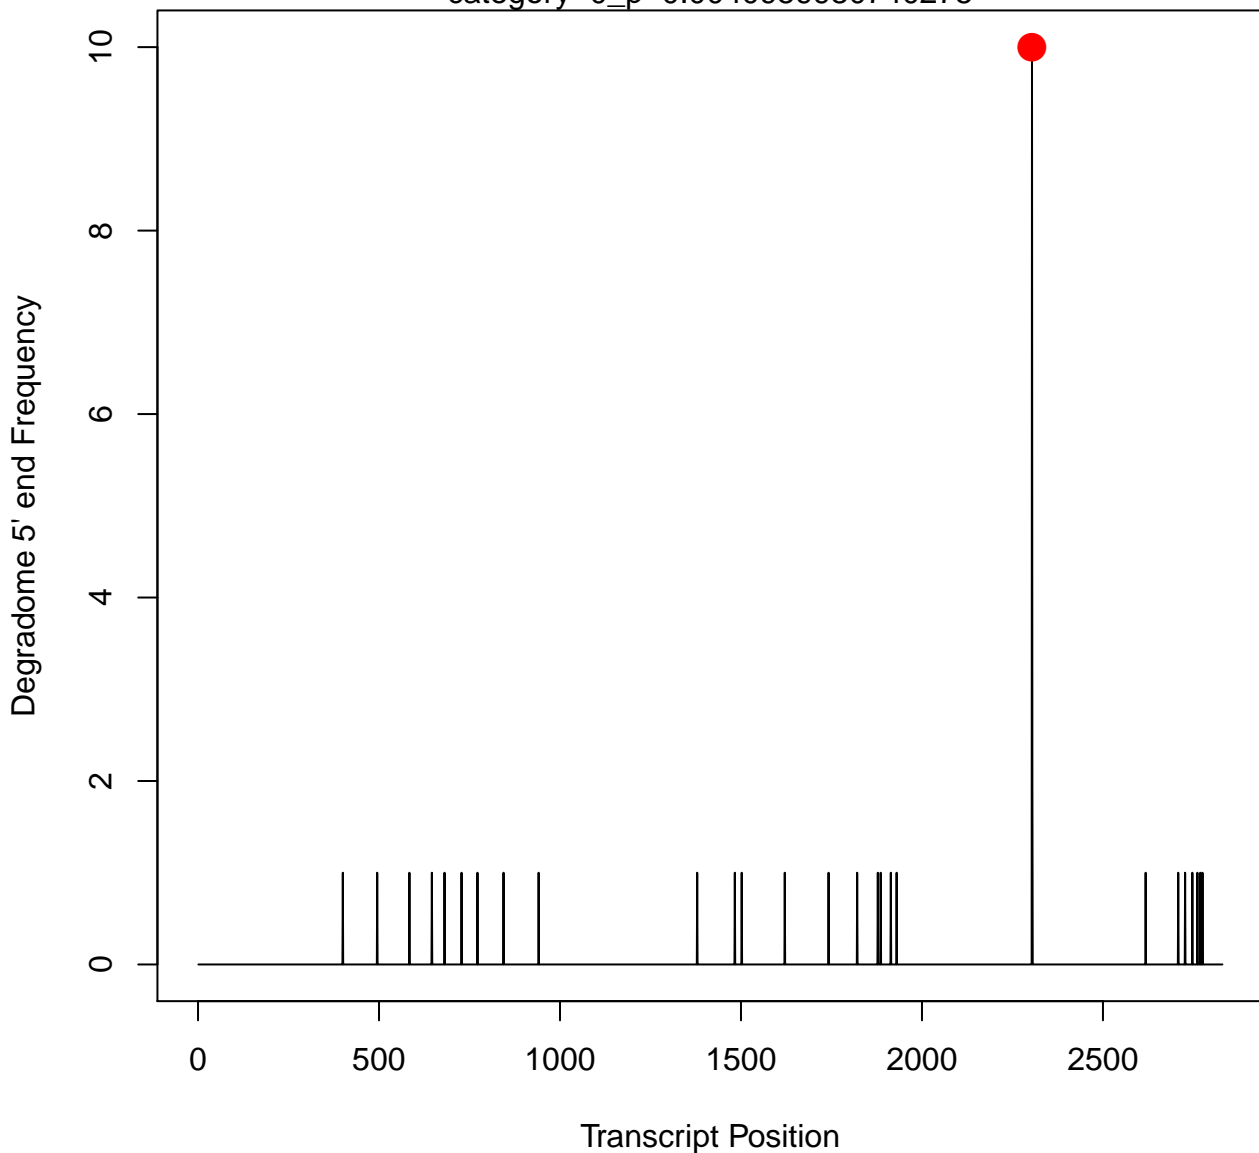

Supplement: s1 [file s1]

**T=Cluster-18410.43901\_Q=novel\_54\_S=68**

category=2\_p=0.0342485307007228

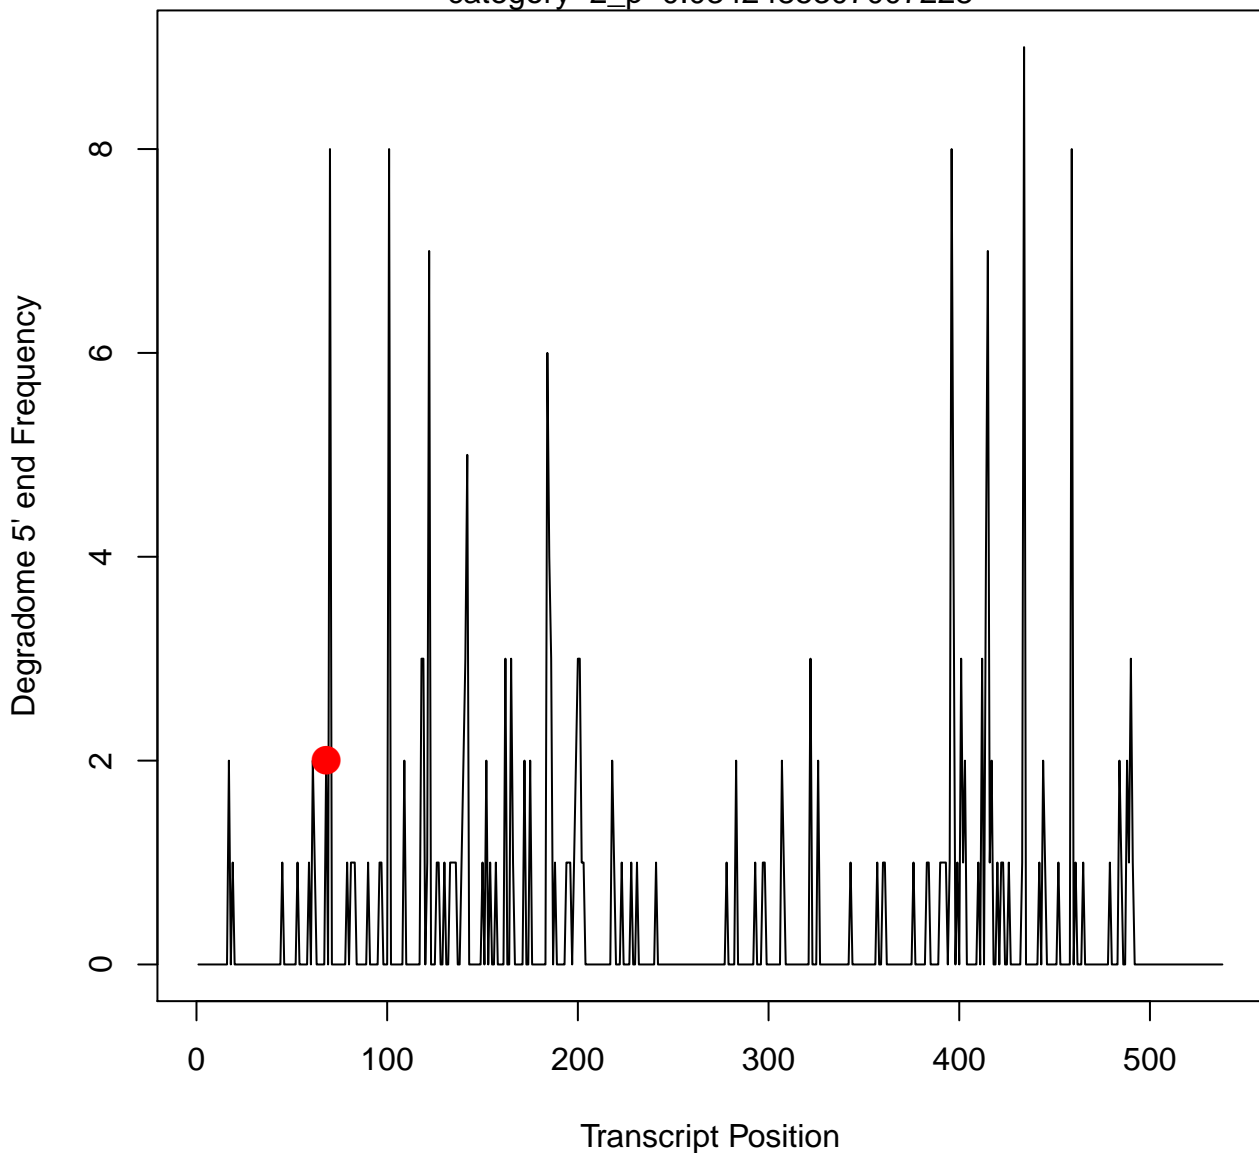

Supplement: s1 [file s1]

**T=Cluster-18410.37940\_Q=pma-miR482a\_S=617**

category=0\_p=0.0229899313939557

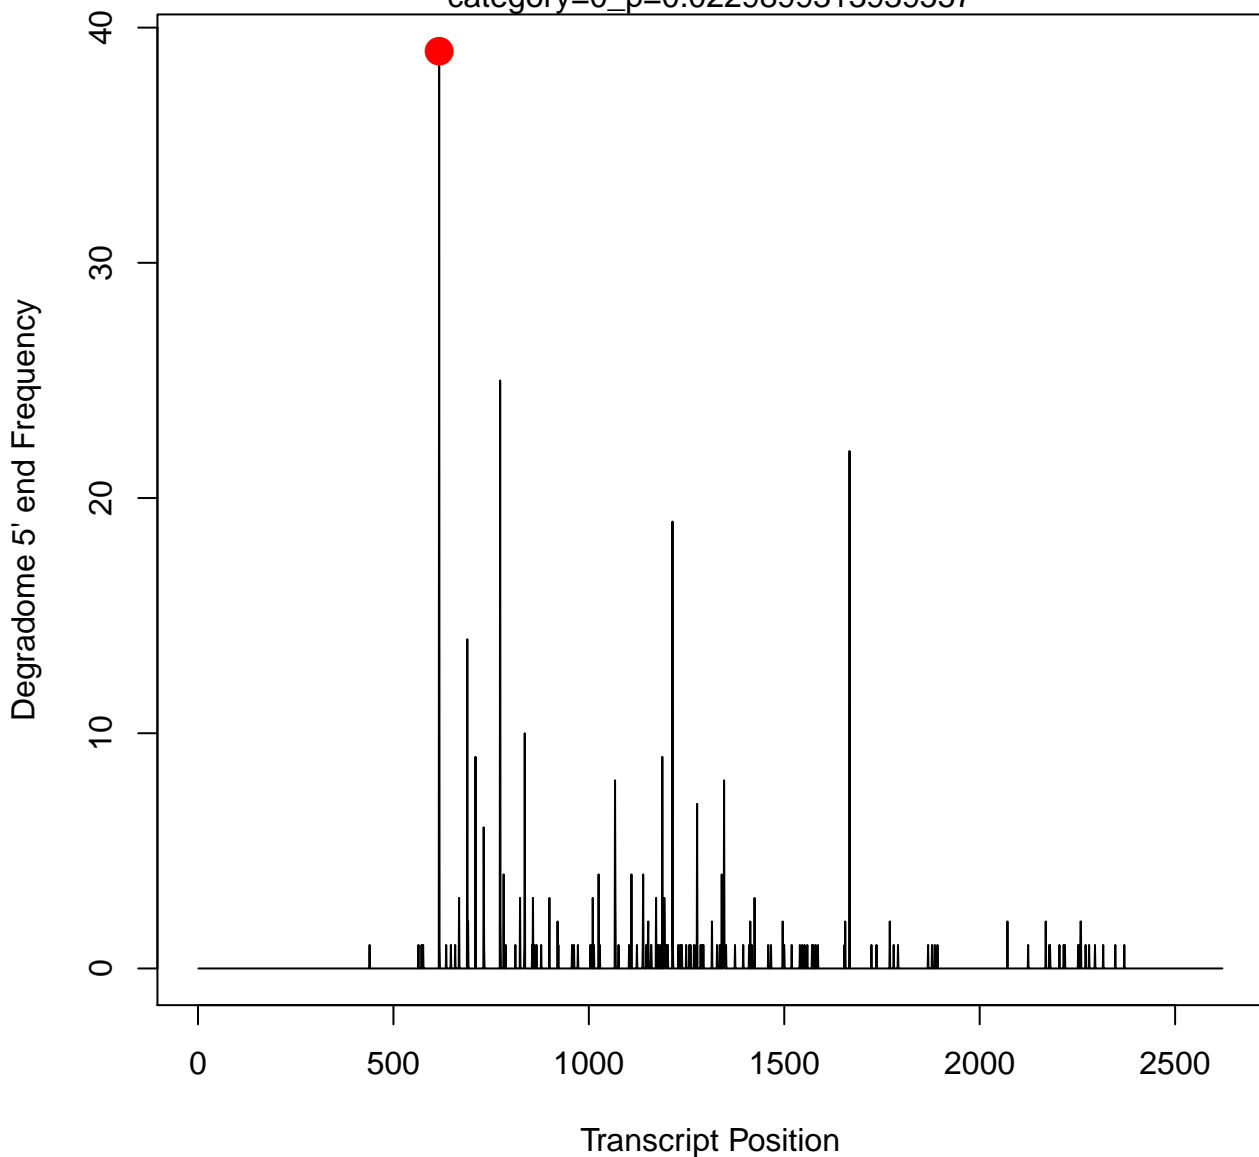

Supplement: s1 [file s1]

**T=Cluster-18410.86050\_Q=novel\_11\_S=478**

category=0\_p=0.018434621893812

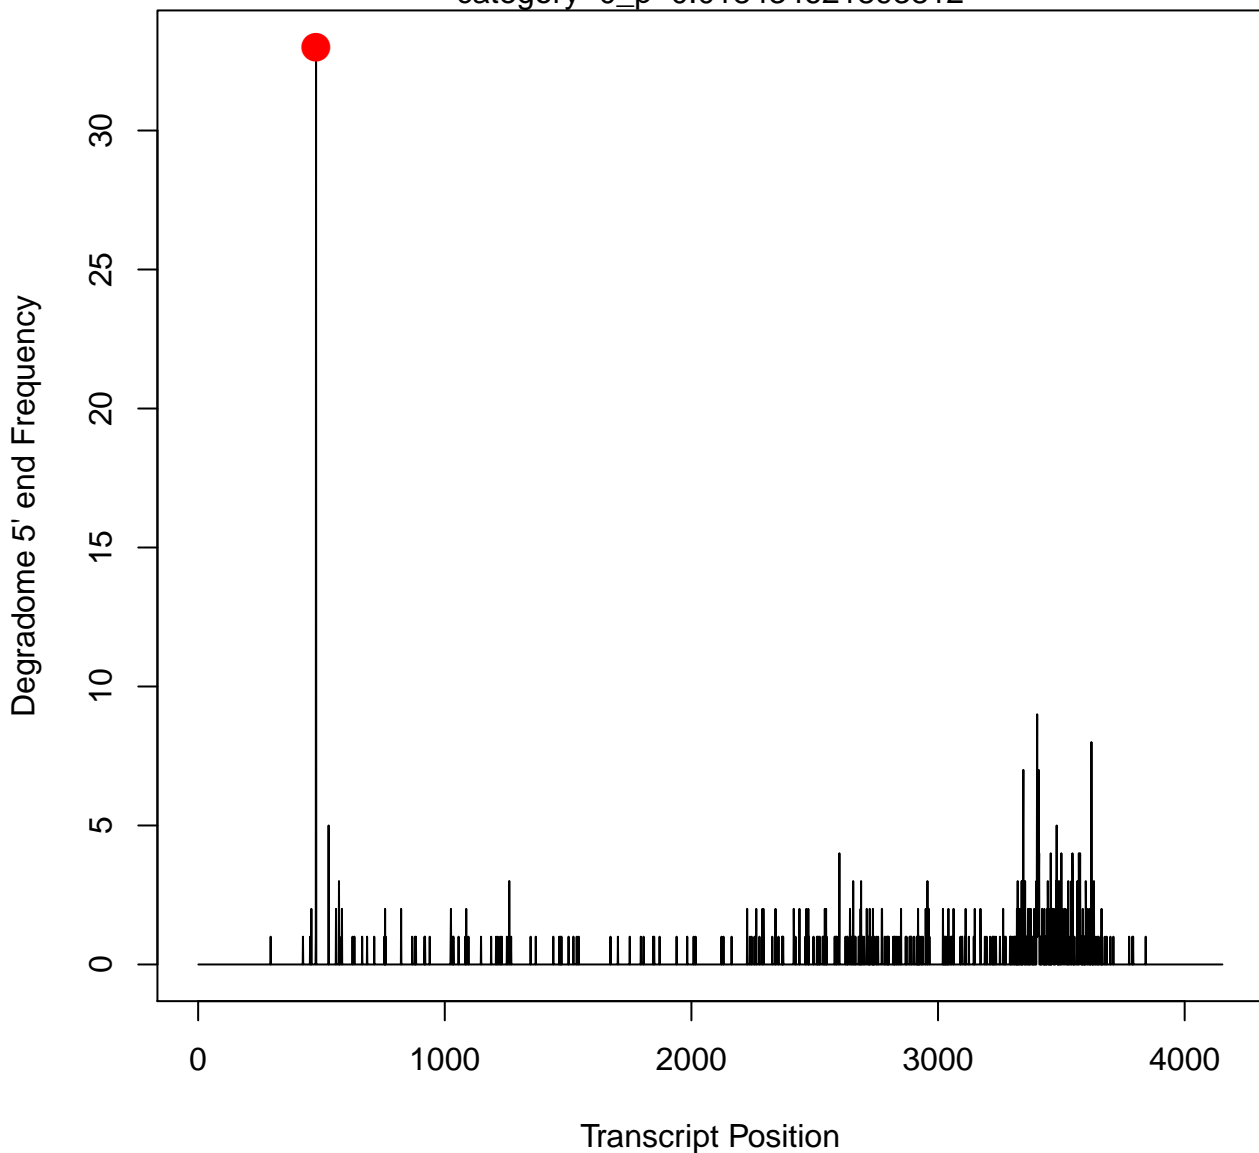

Supplement: s1 [file s1]

**T=Cluster-18410.80179\_Q=novel\_88\_S=372**

category=1\_p=0.000311907922912802

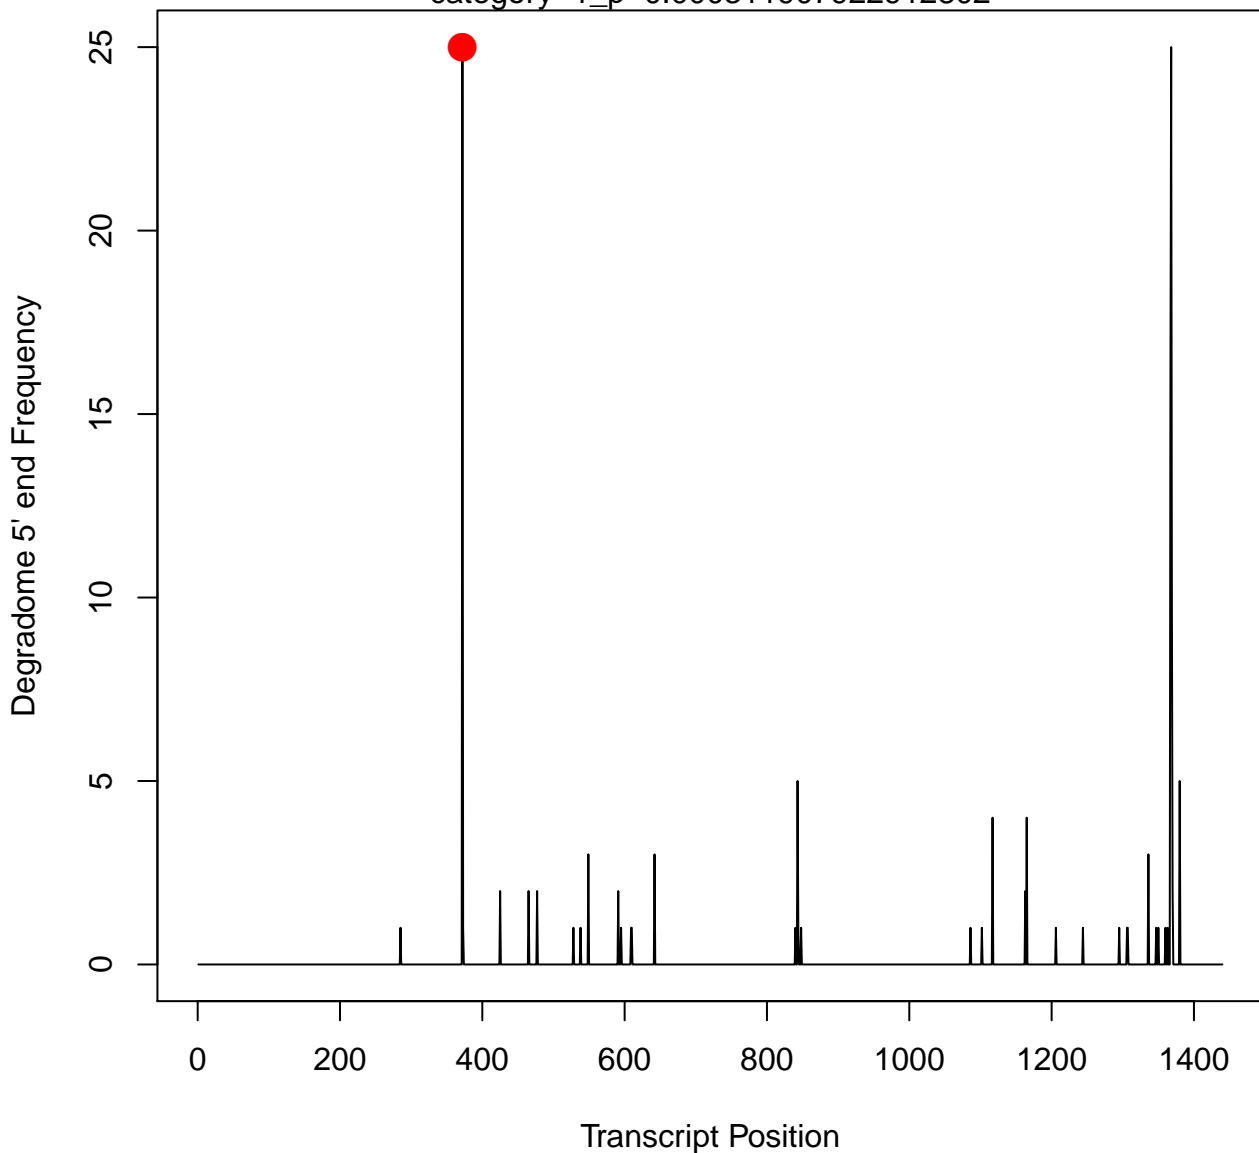

Supplement: s1 [file s1]

**T=Cluster-18410.92680\_Q=novel\_65\_S=428**

category=0\_p=0.00027358987754178

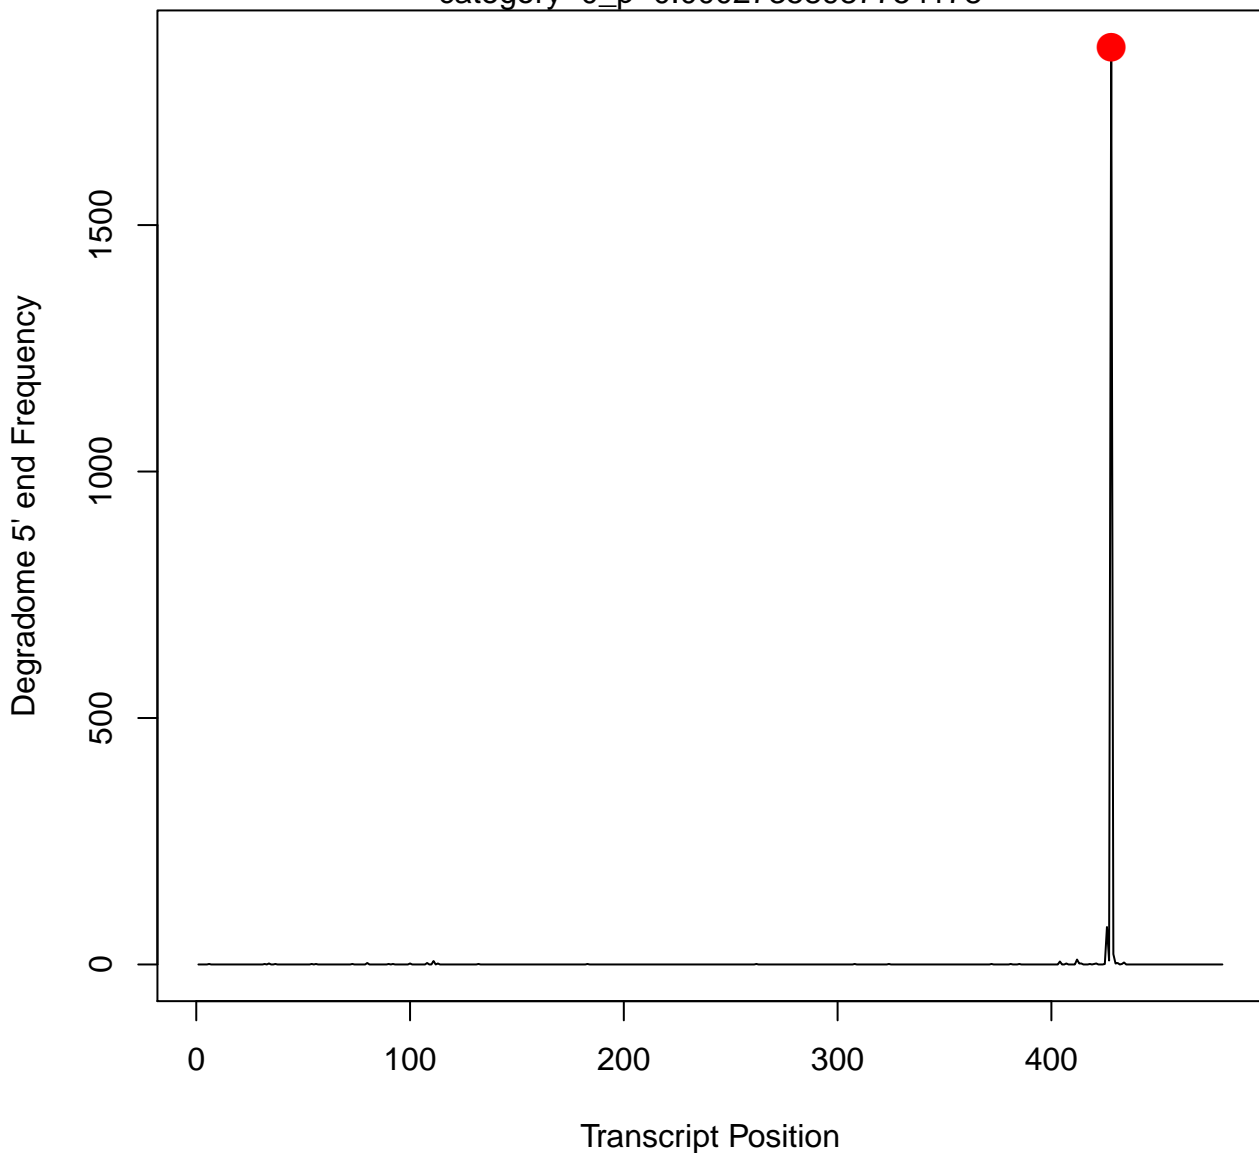

Supplement: s1 [file s1]

**T=Cluster-18410.10981\_Q=novel\_1\_S=820**

category=0\_p=0.00164041690342198

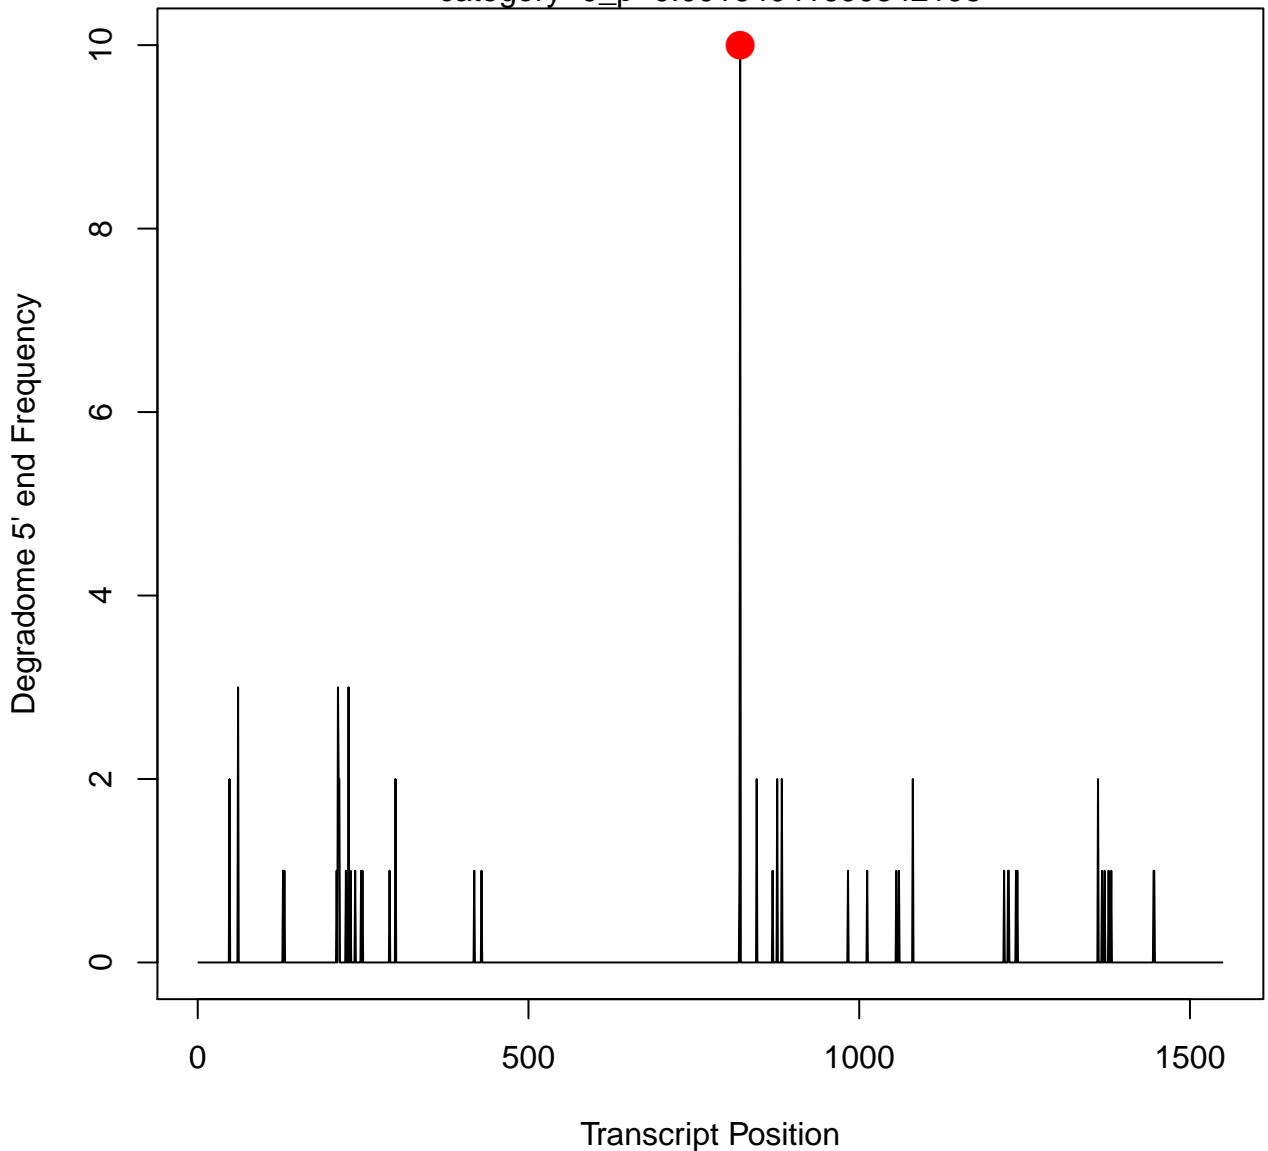

Supplement: s1 [file s1]

**T=Cluster-18410.90640\_Q=novel\_28\_S=1079**

category=0\_p=0.00109391048354923

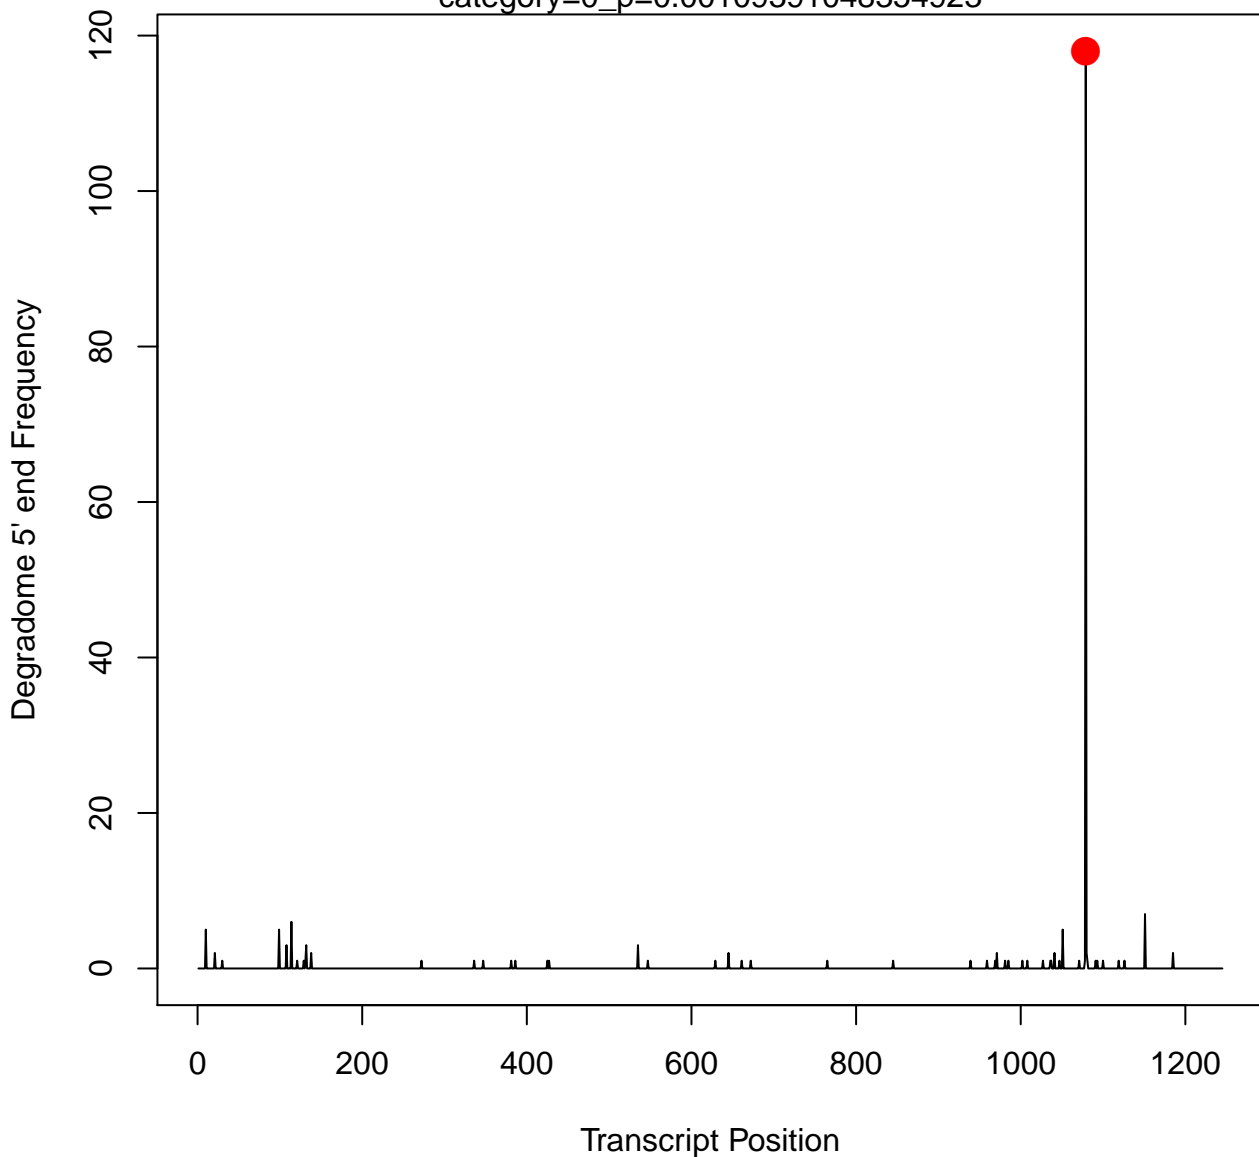

Supplement: s1 [file s1]

**T=Cluster-18410.56489\_Q=novel\_29\_S=2476**

category=0\_p=0.00600171812373296

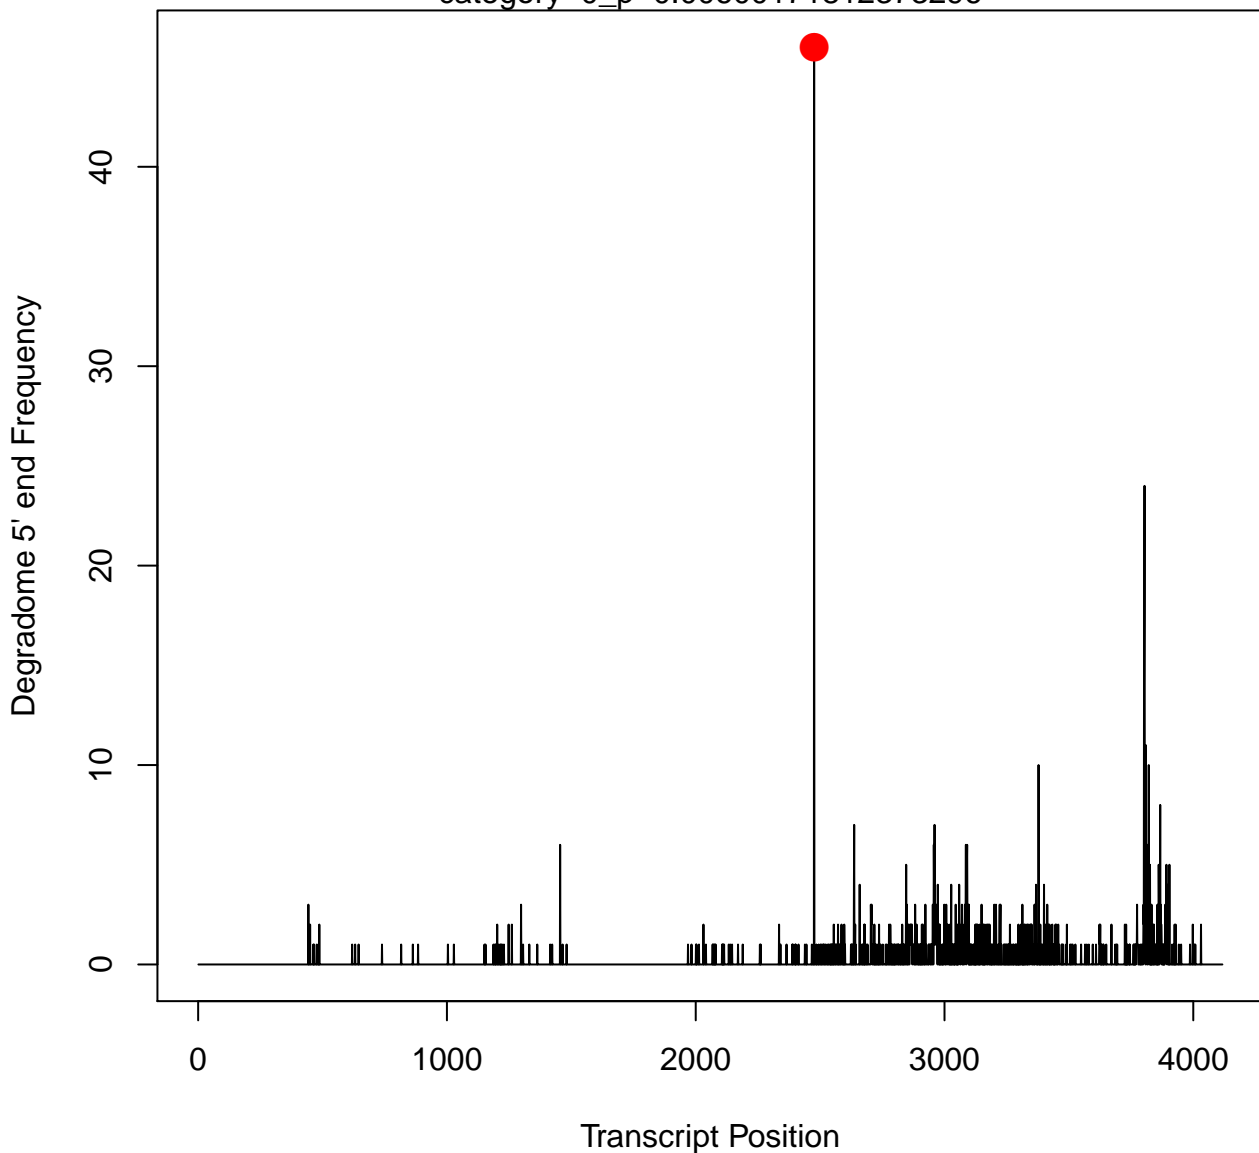

Supplement: s1 [file s1]

**T=Cluster-18410.32909\_Q=novel\_35\_S=485**

category=0\_p=0.005185427902343

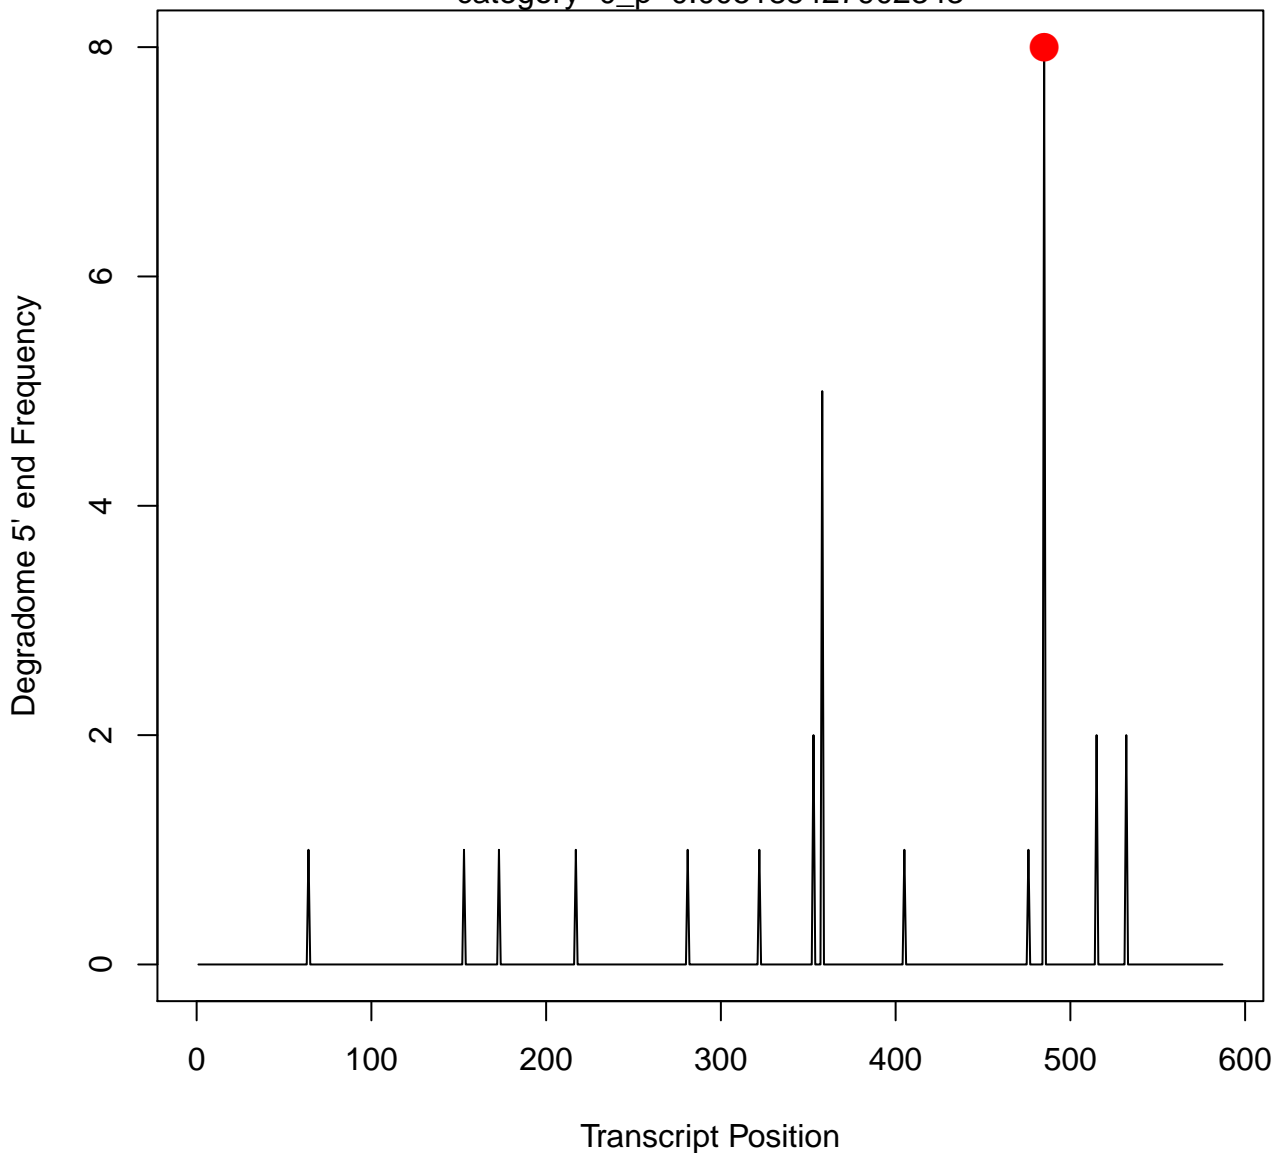

Supplement: s1 [file s1]

**T=Cluster-18410.112455\_Q=novel\_168\_S=245**

category=2\_p=0.0115490438418195

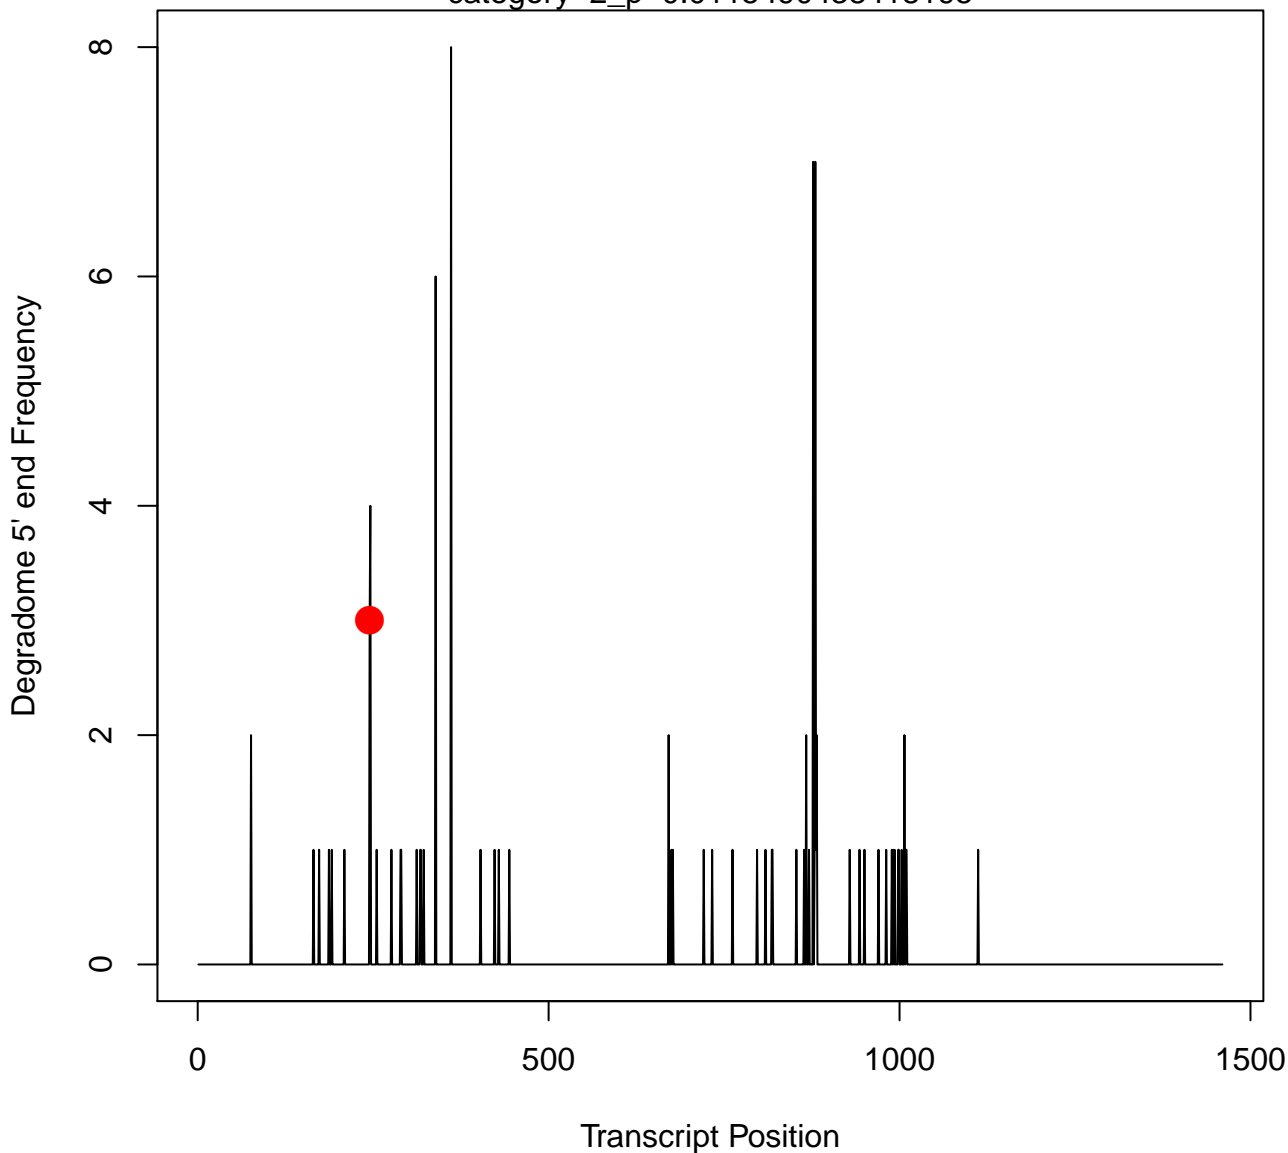

Supplement: s1 [file s1]

**T=Cluster-18410.13945\_Q=novel\_21\_S=1046**

category=0\_p=0.00300537520191857

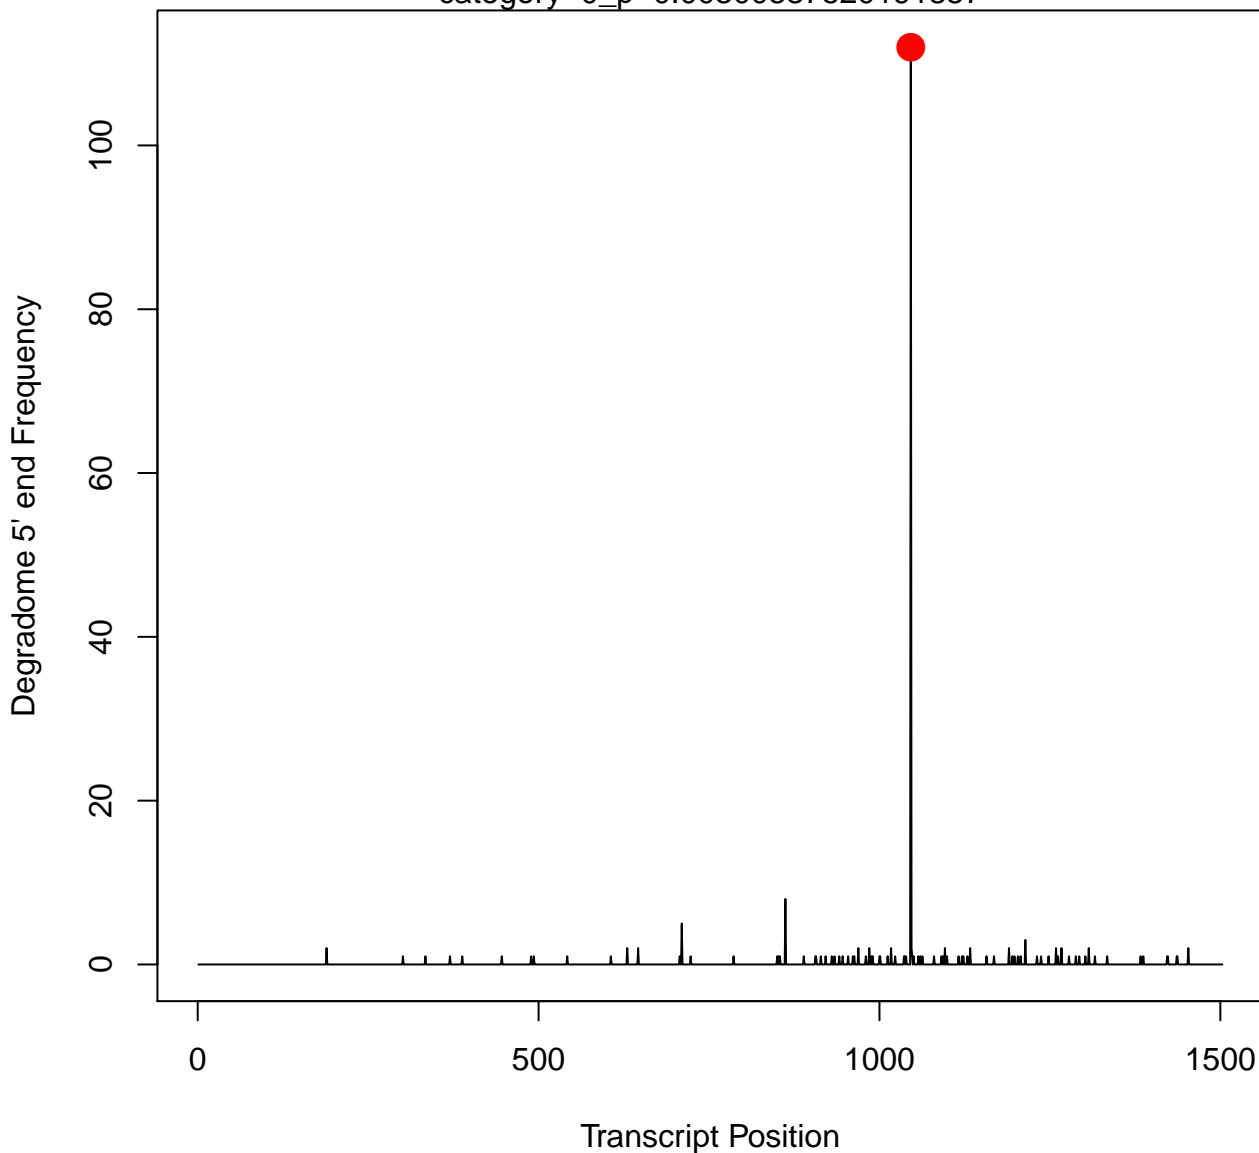

Supplement: s1 [file s1]

**T=Cluster-18410.66391\_Q=novel\_169\_S=366**

category=0\_p=0.00027358987754178

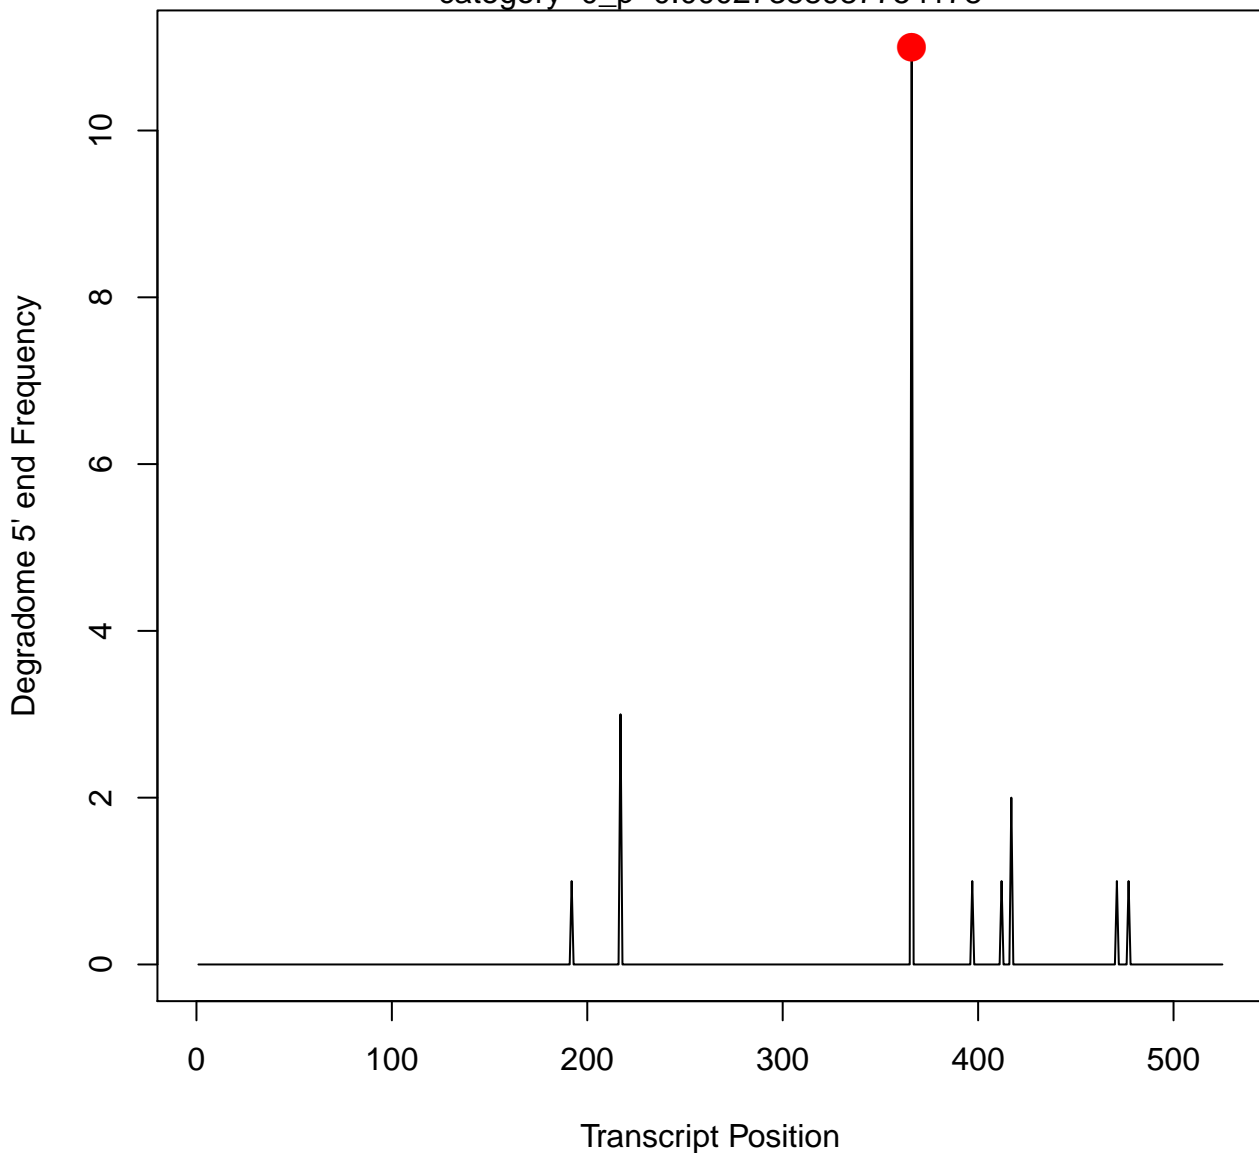

Supplement: s1 [file s1]

**T=Cluster-18410.27958\_Q=pma-miR949\_S=127**

category=0\_p=0.00926018647366955

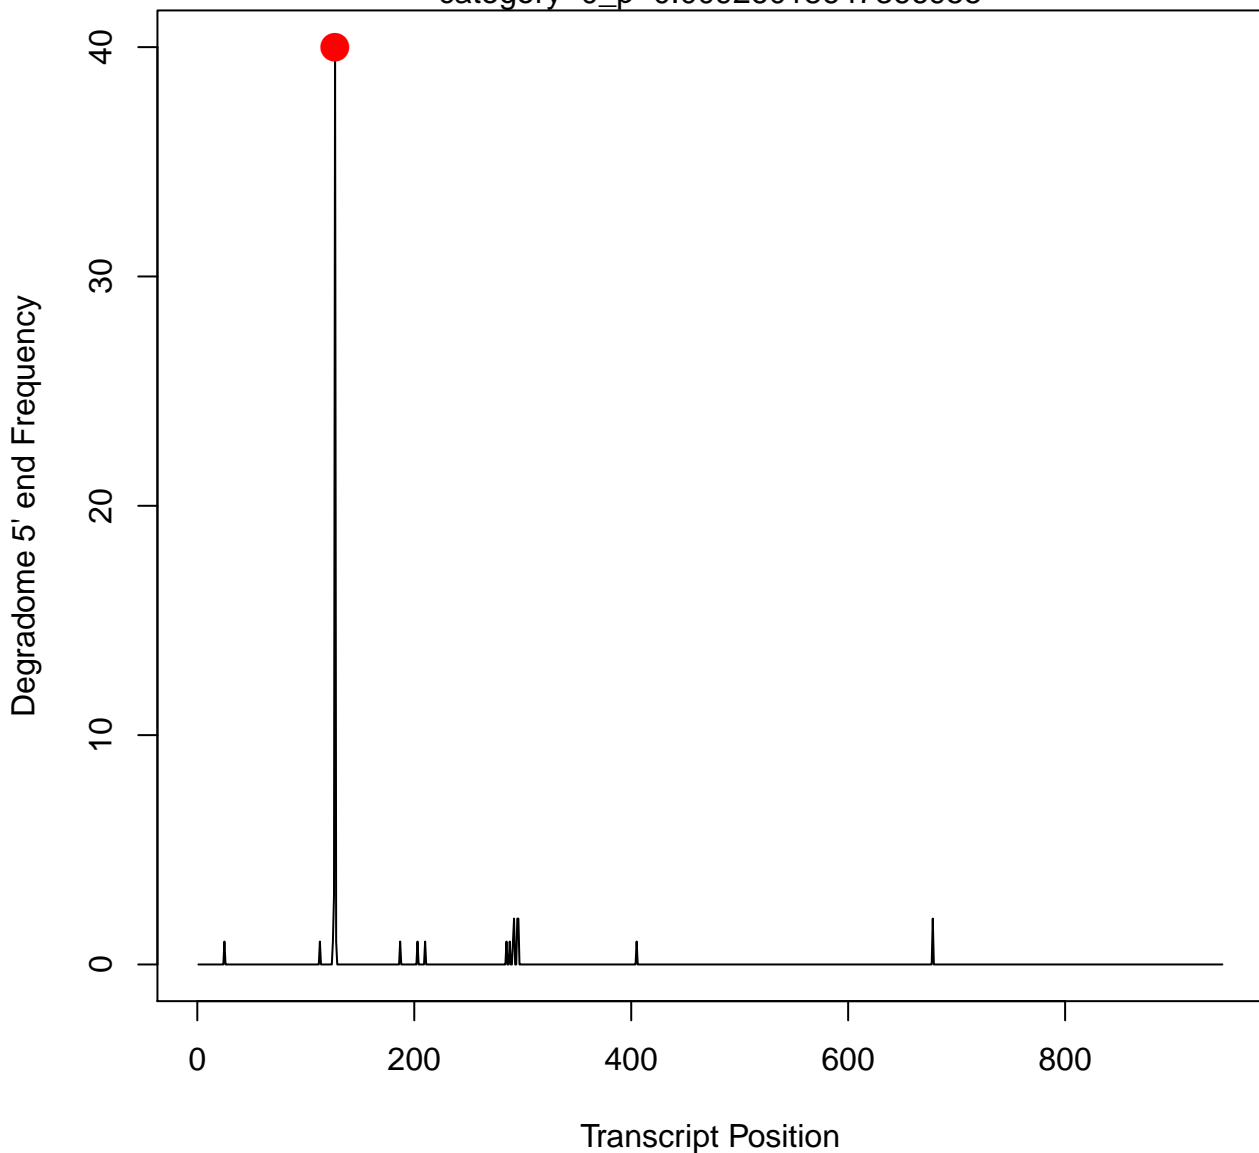

Supplement: s1 [file s1]

**T=Cluster-18410.98577\_Q=novel\_23\_S=1068**

category=0\_p=0.00136720107825572

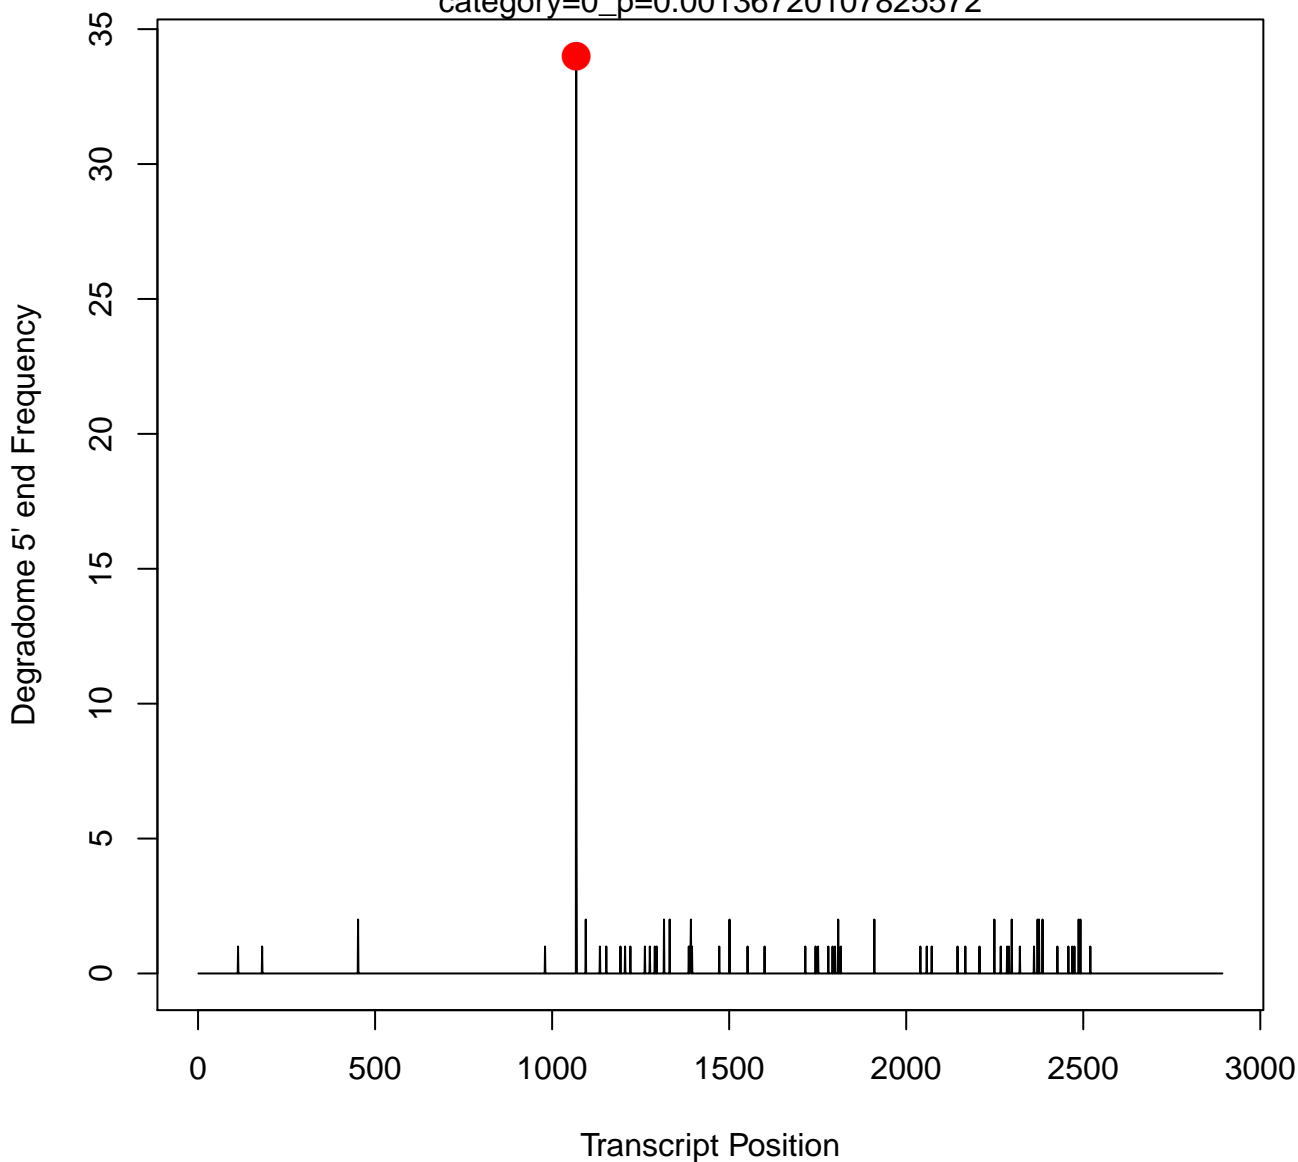

Supplement: s1 [file s1]

**T=Cluster-18410.98009\_Q=novel\_111\_S=857**

category=2\_p=0.0115490438418195

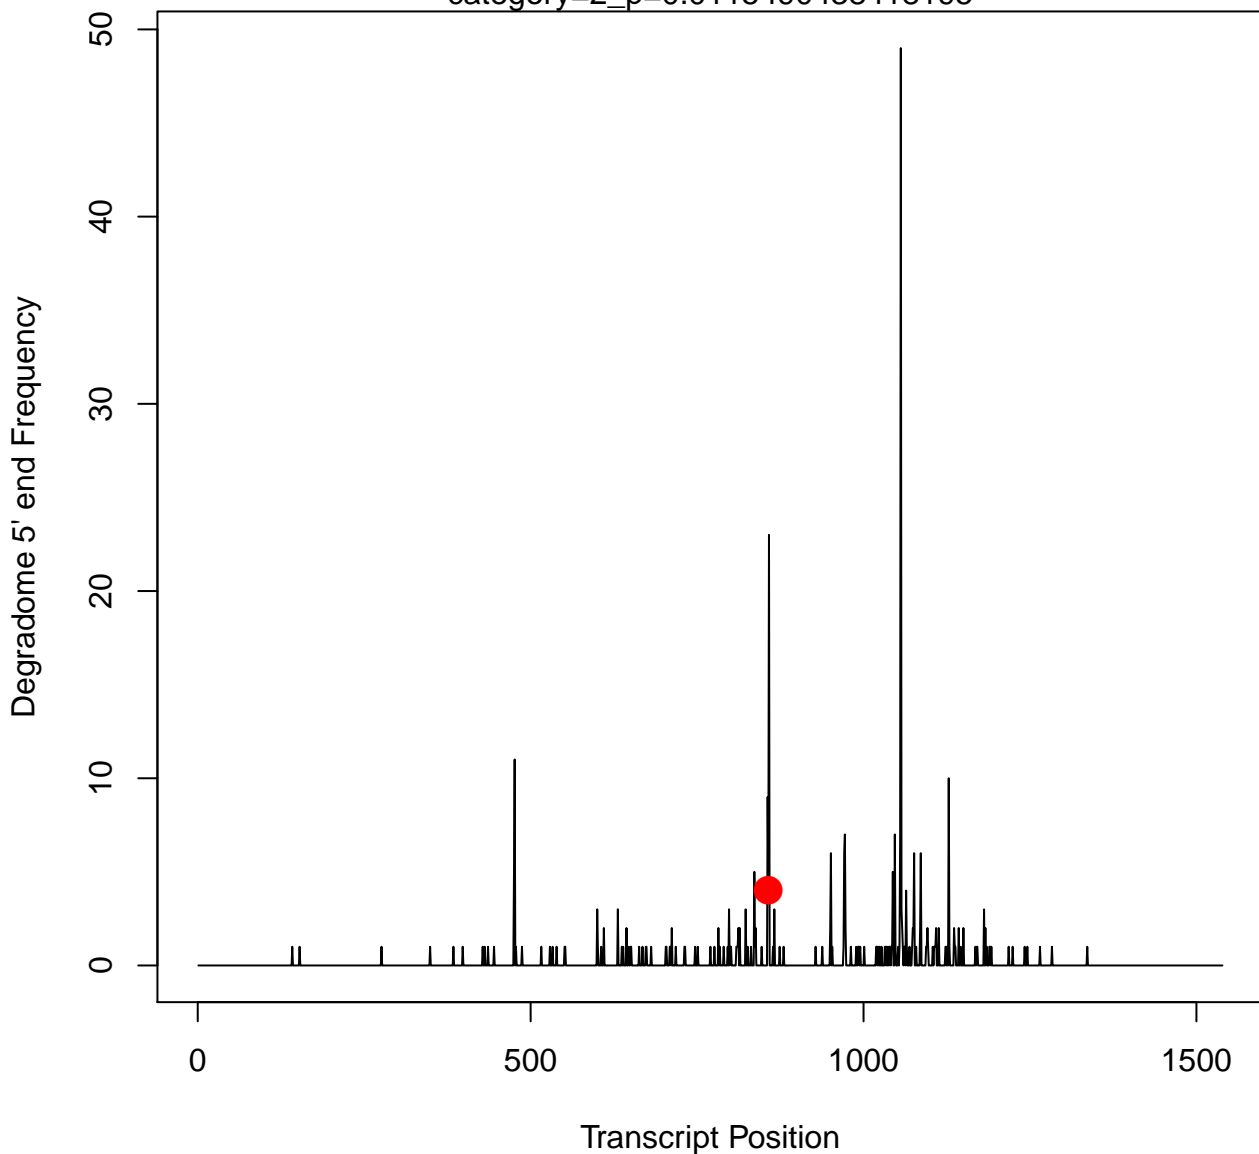

Supplement: s1 [file s1]

**T=Cluster-18410.68236\_Q=novel\_2\_S=414**

category=2\_p=0.0342485307007228

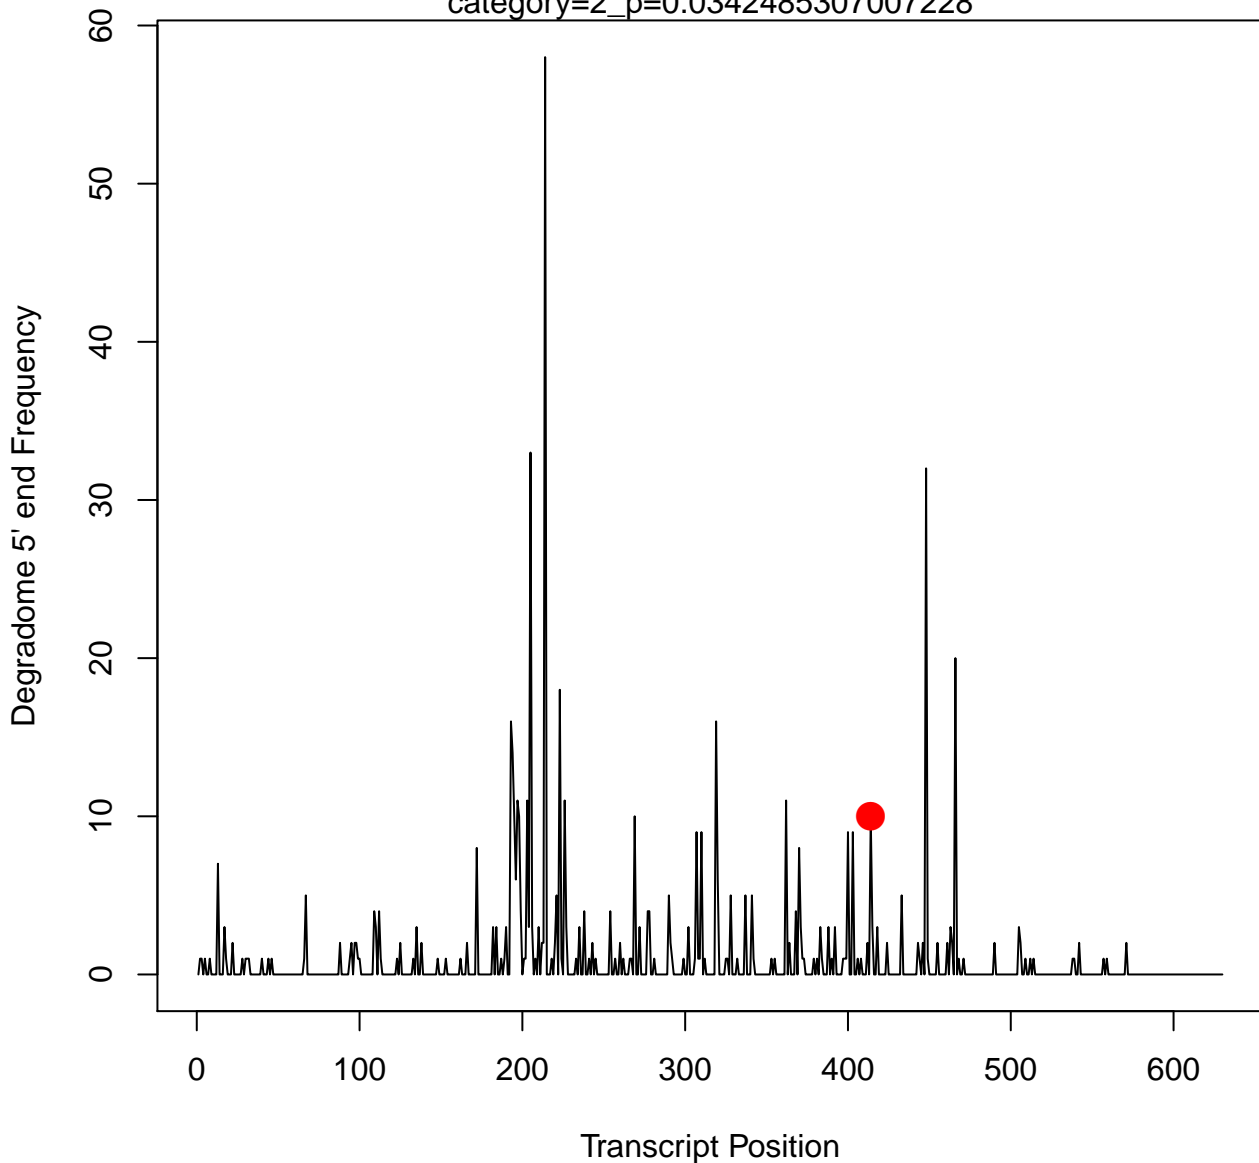

Supplement: s1 [file s1]

**T=Cluster-18410.115550\_Q=pma-miR951\_S=362**

category=0\_p=0.0119674156270292

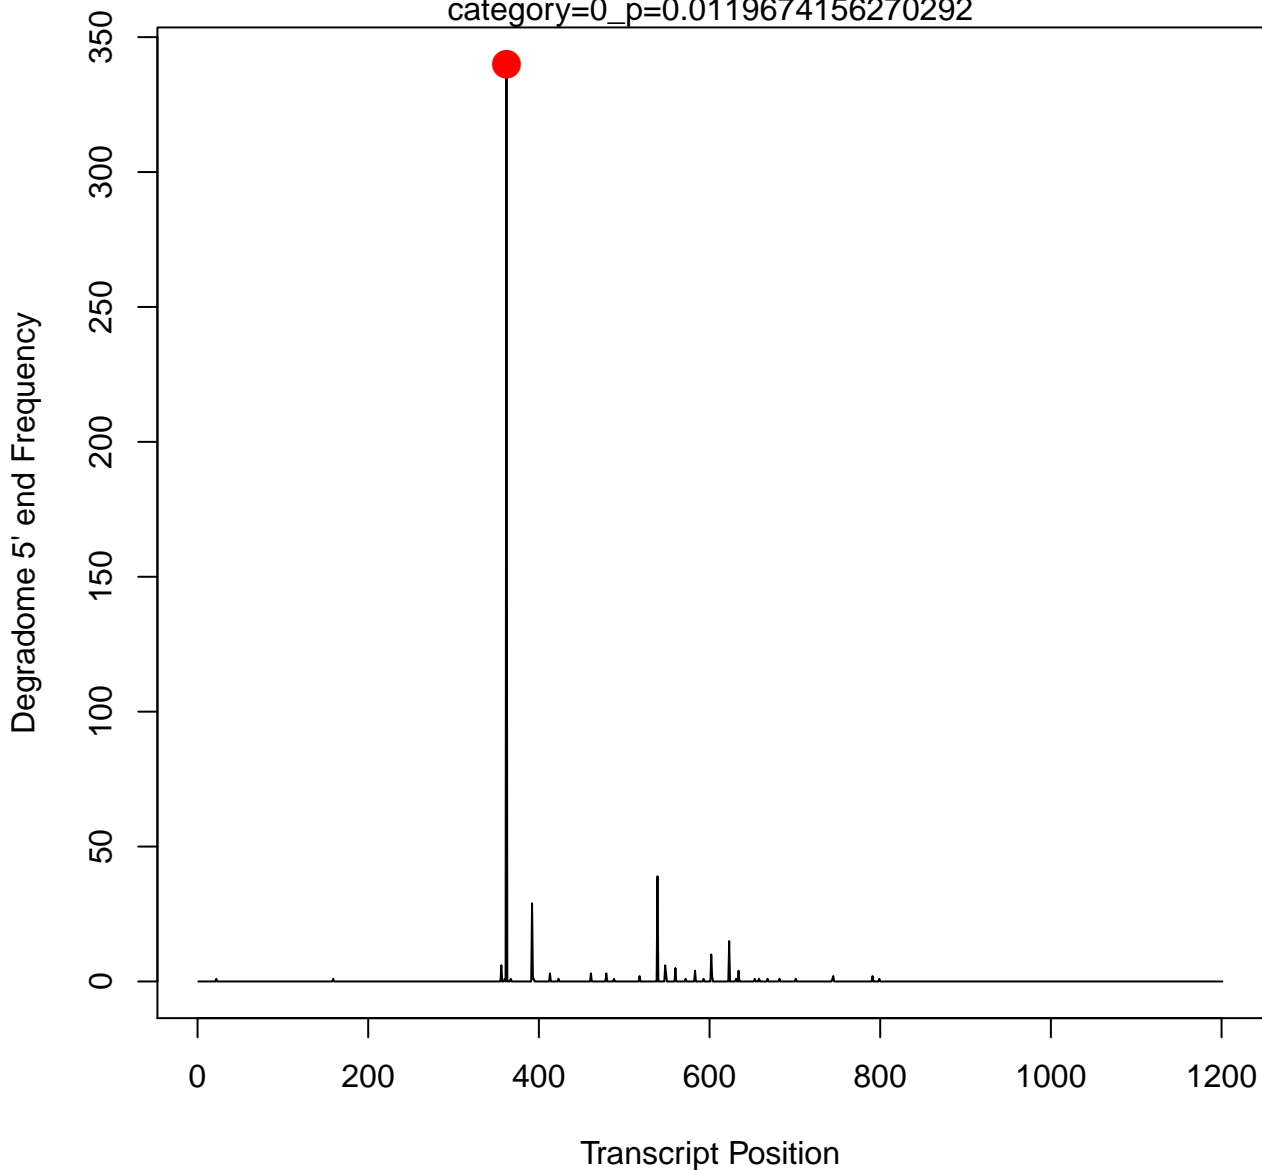

Supplement: s1 [file s1]

**T=Cluster-18410.13636\_Q=novel\_20\_S=1477**

category=0\_p=0.0227225581783234

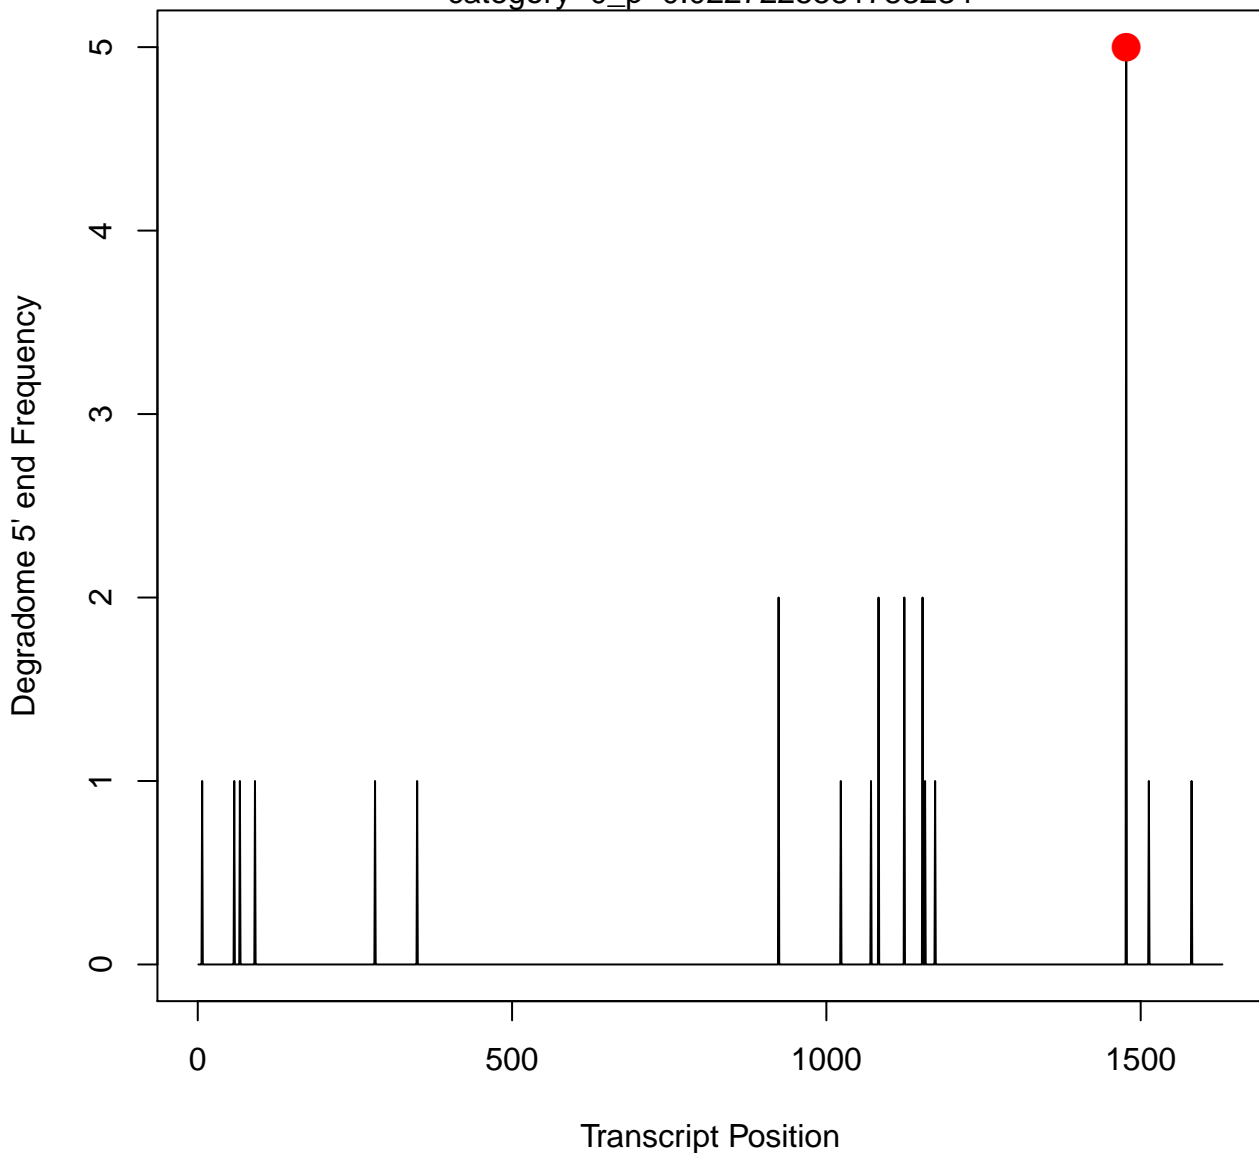

Supplement: s1 [file s1]

**T=Cluster-18410.91083\_Q=novel\_32\_S=339**

category=0\_p=0.0240586929505371

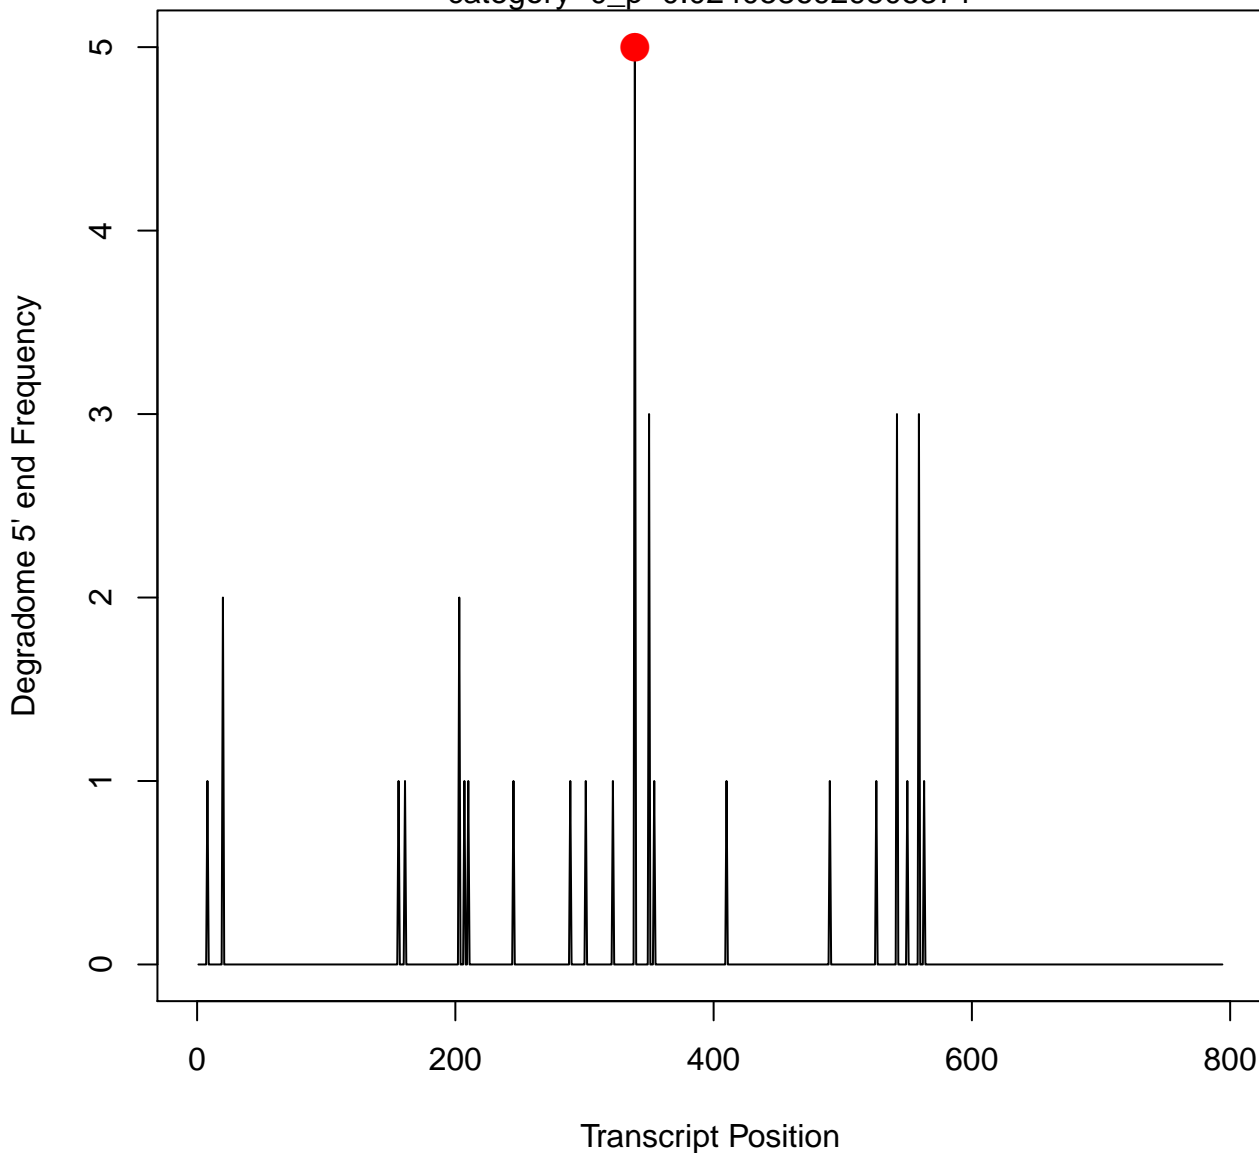

Supplement: s1 [file s1]

**T=Cluster-18410.6239\_Q=pma-miR947\_S=367**

category=2\_p=0.0992668787568005

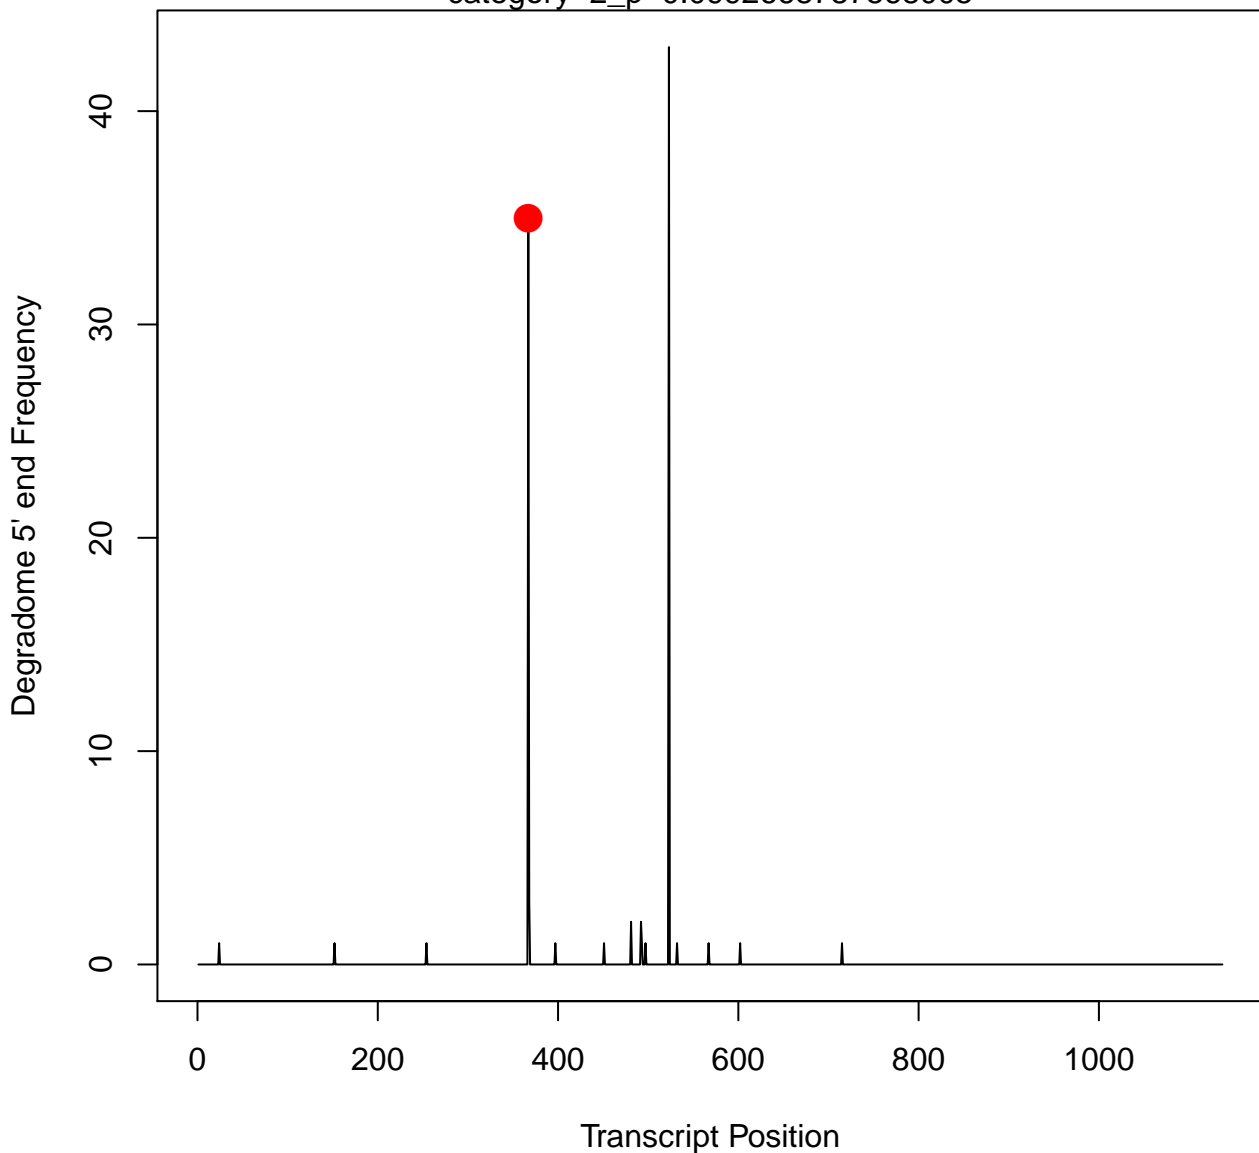

Supplement: s1 [file s1]

**T=Cluster-18410.73674\_Q=novel\_102\_S=192**

category=1\_p=0.07905644950796

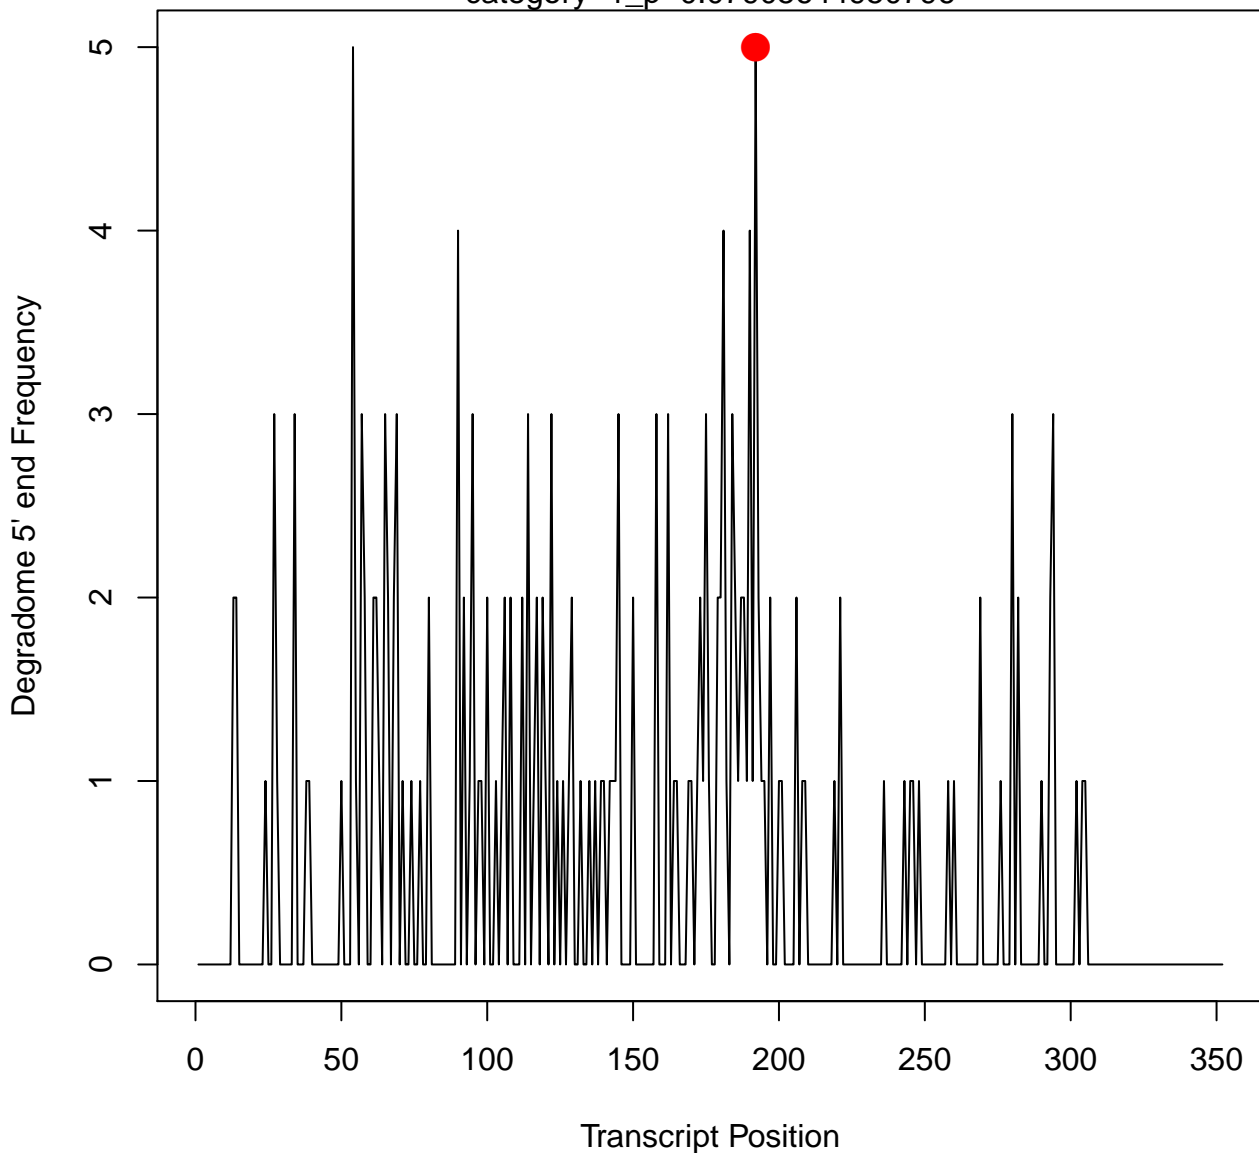

Supplement: s1 [file s1]

**T=Cluster-18410.103780\_Q=novel\_20\_S=208**

category=1\_p=0.0206841766924972

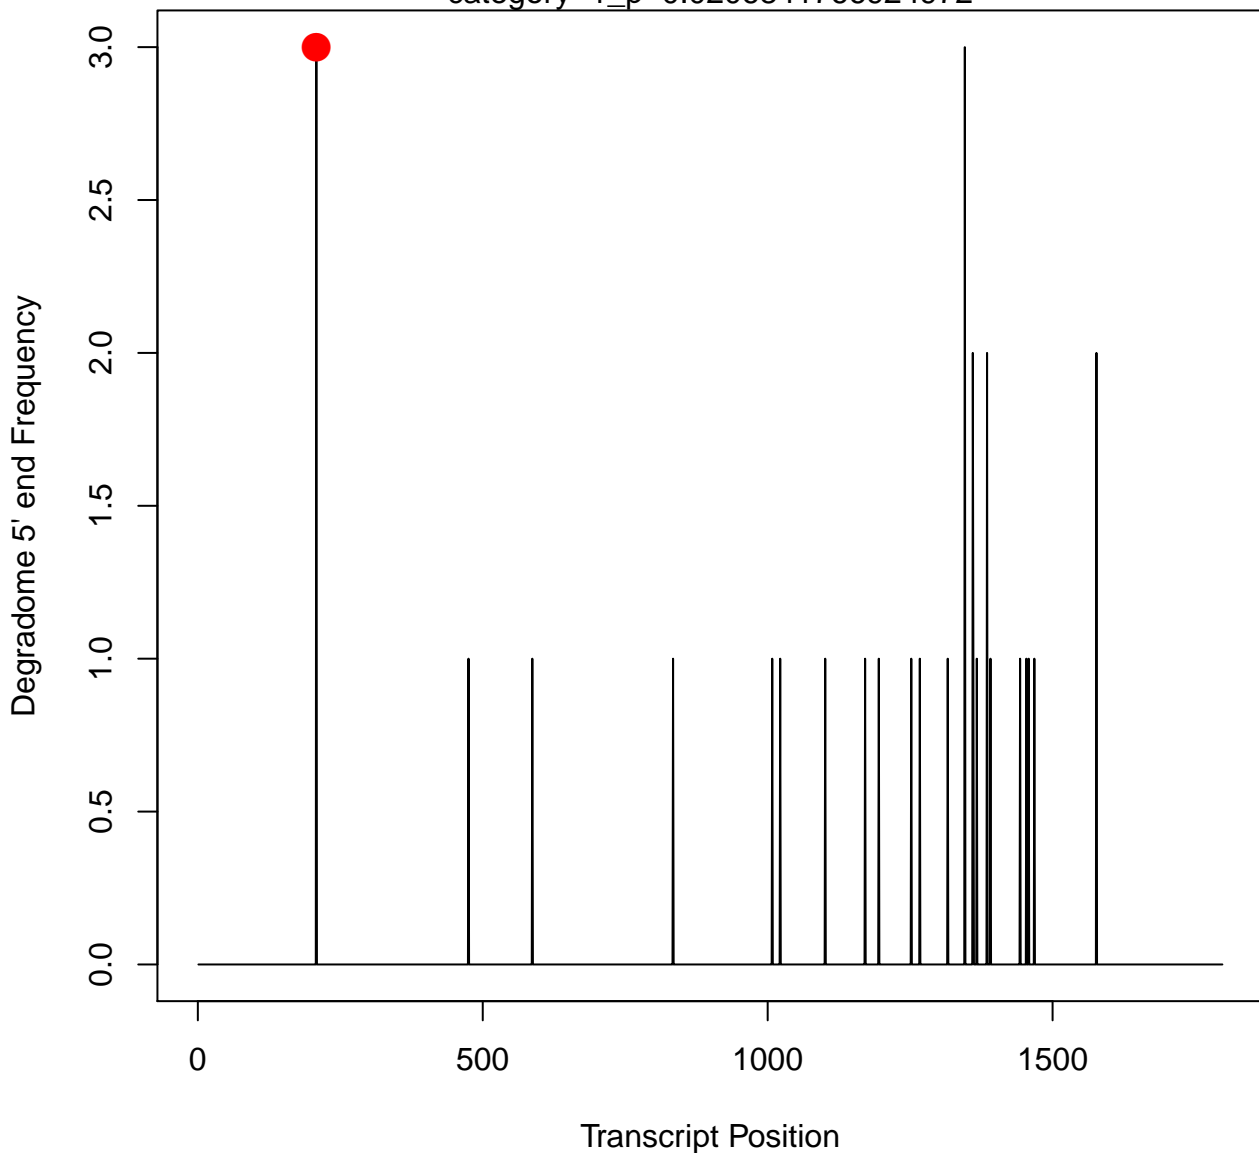

Supplement: s1 [file s1]

**T=Cluster-18410.115438\_Q=pma-miR947\_S=367**

category=0\_p=0.00300537520191857

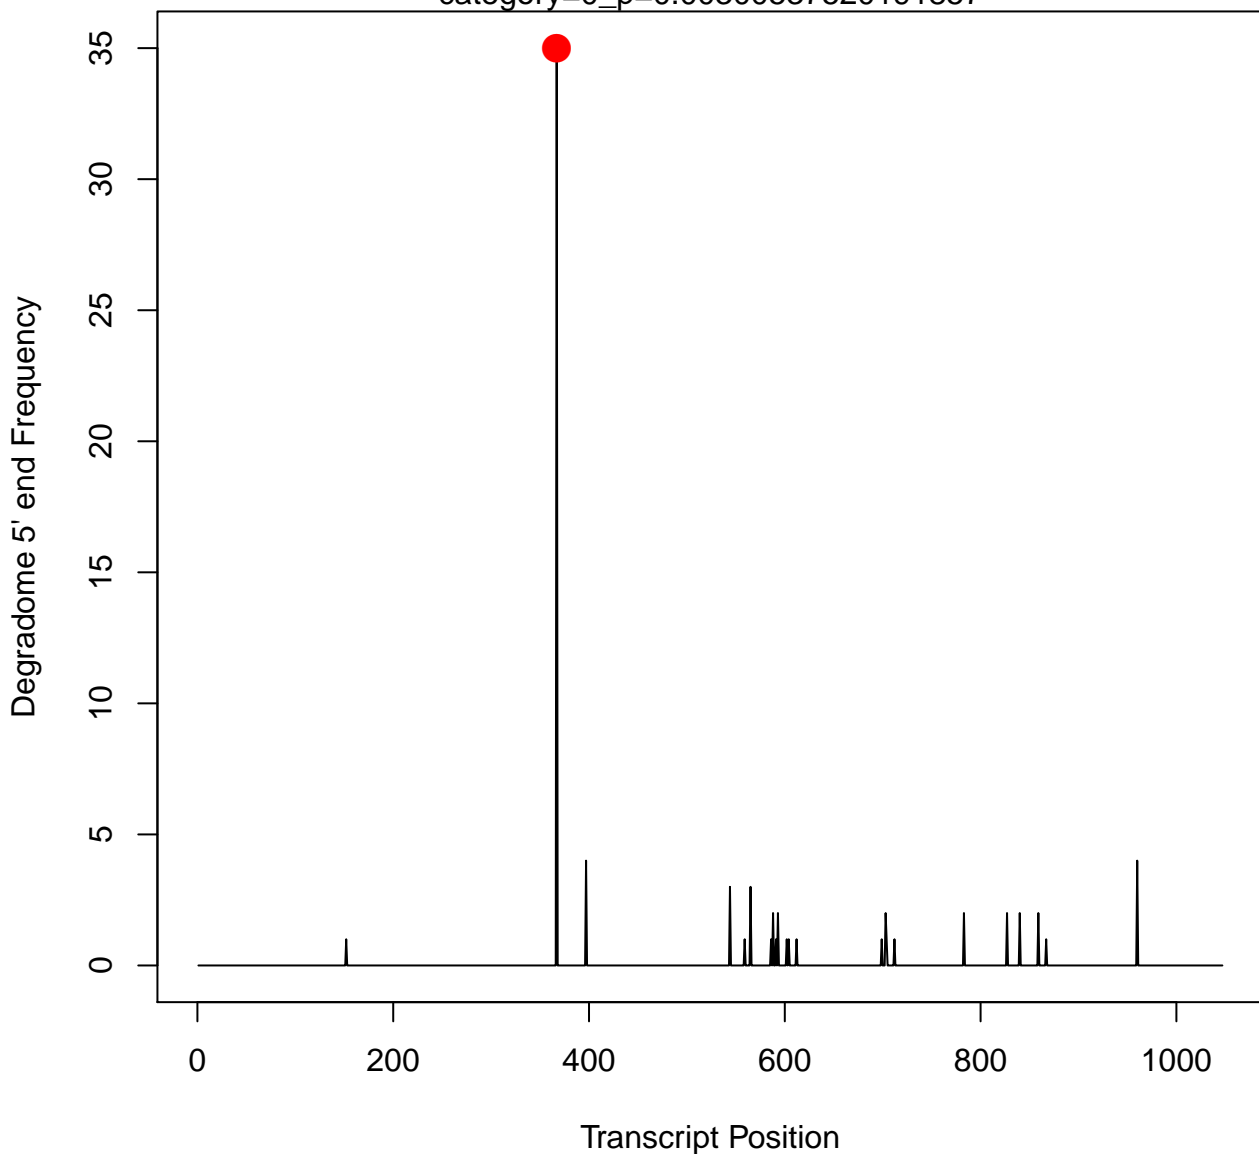

Supplement: s1 [file s1]

**T=Cluster-18410.72938\_Q=novel\_2\_S=1419**

category=3\_p=0.093081058041071

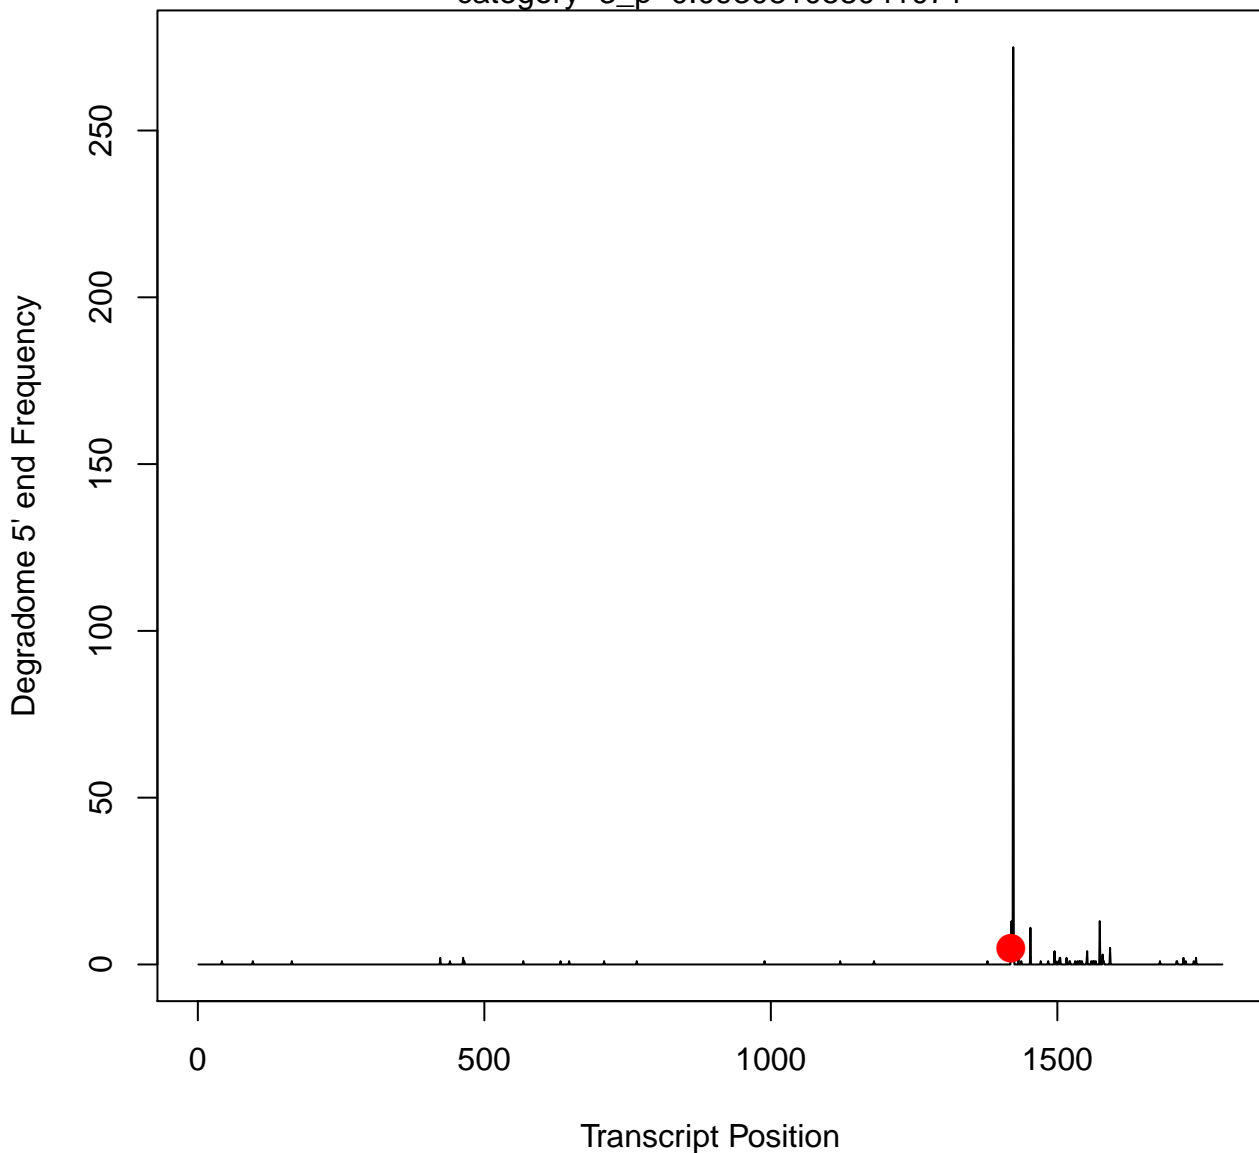

Supplement: s1 [file s1]

**T=Cluster-18410.81211\_Q=novel\_12\_S=122**

category=0\_p=0.00027358987754178

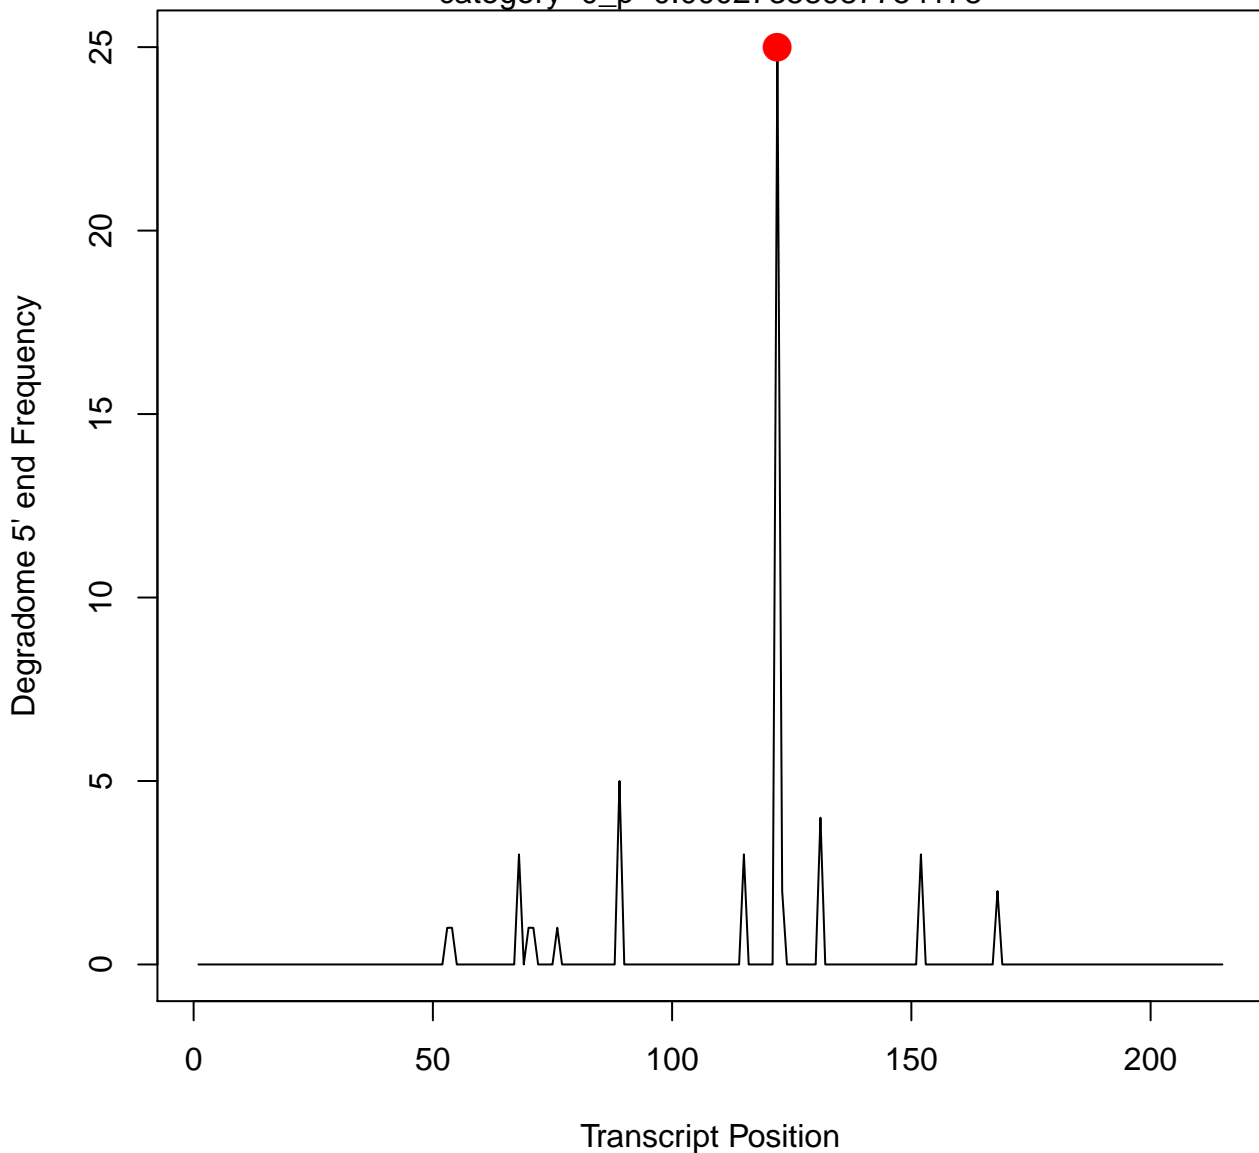

Supplement: s1 [file s1]

**T=Cluster-18410.63994\_Q=novel\_113\_S=924**

category=0\_p=0.00491318222172366

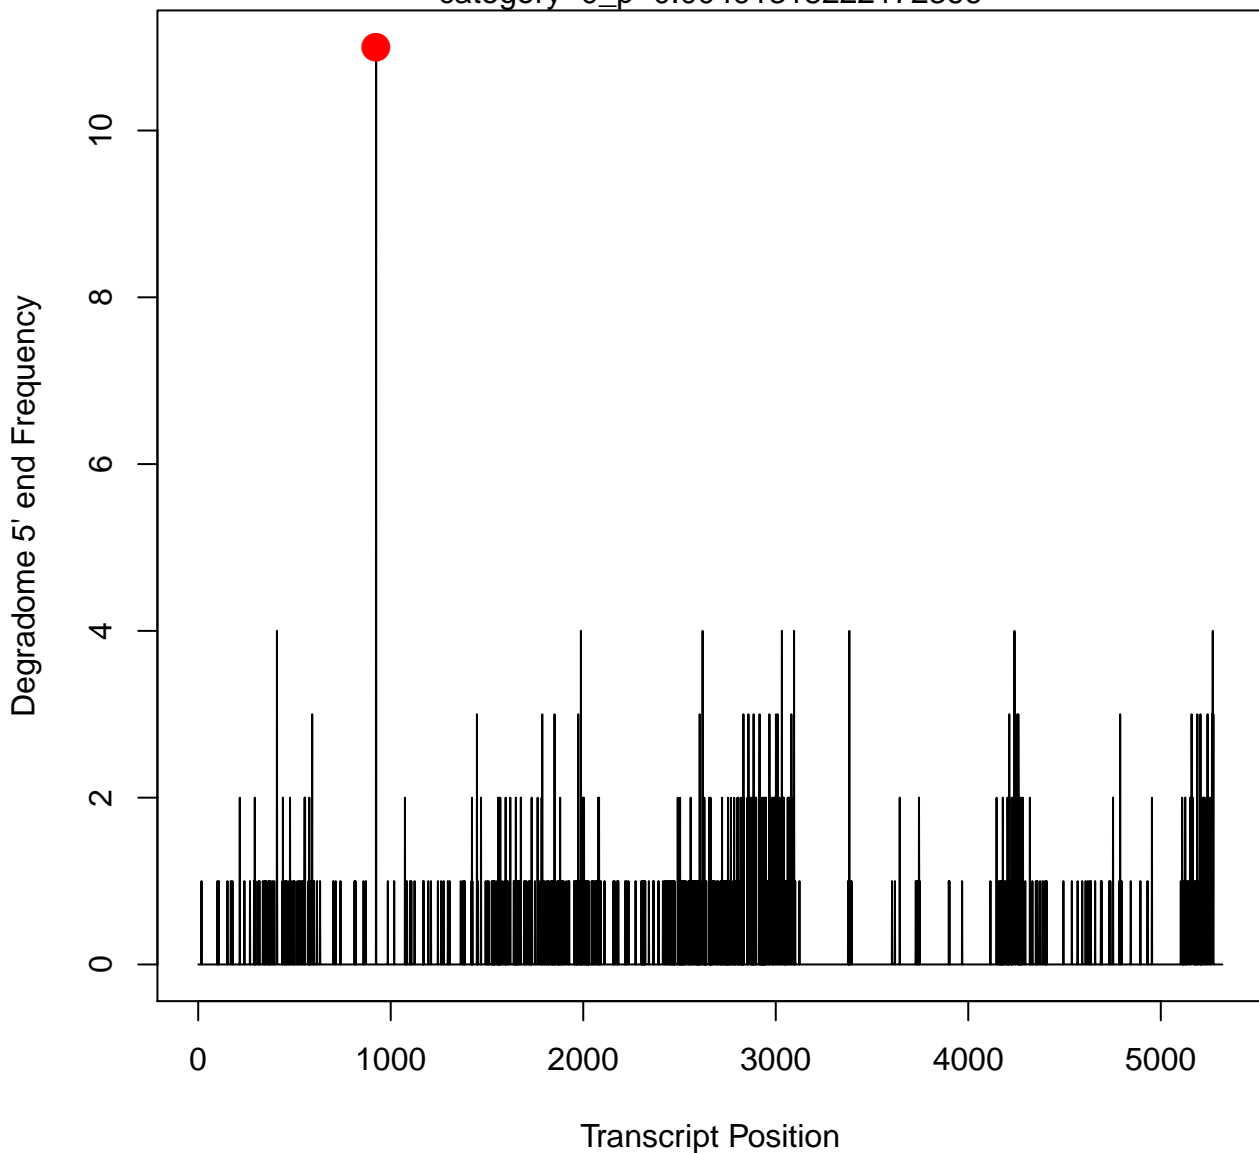

Supplement: s1 [file s1]

**T=Cluster-18410.98231\_Q=novel\_34\_S=198**

category=0\_p=0.00218662432695249

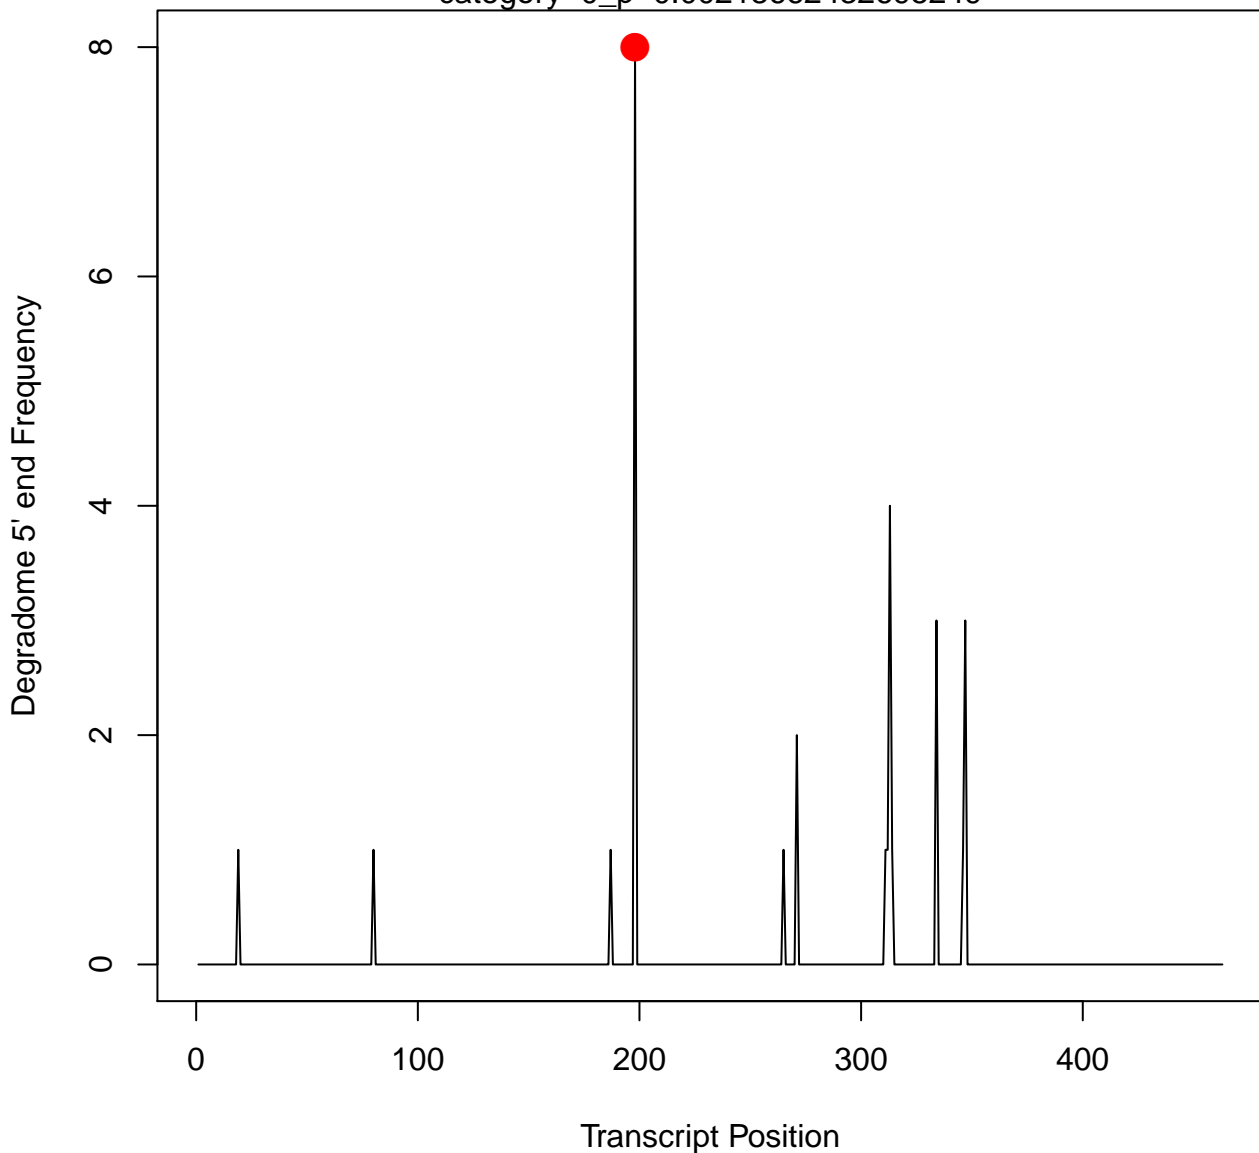

Supplement: s1 [file s1]

**T=Cluster-15837.0\_Q=pma-miR1314\_S=401**

category=2\_p=0.0564267304887326

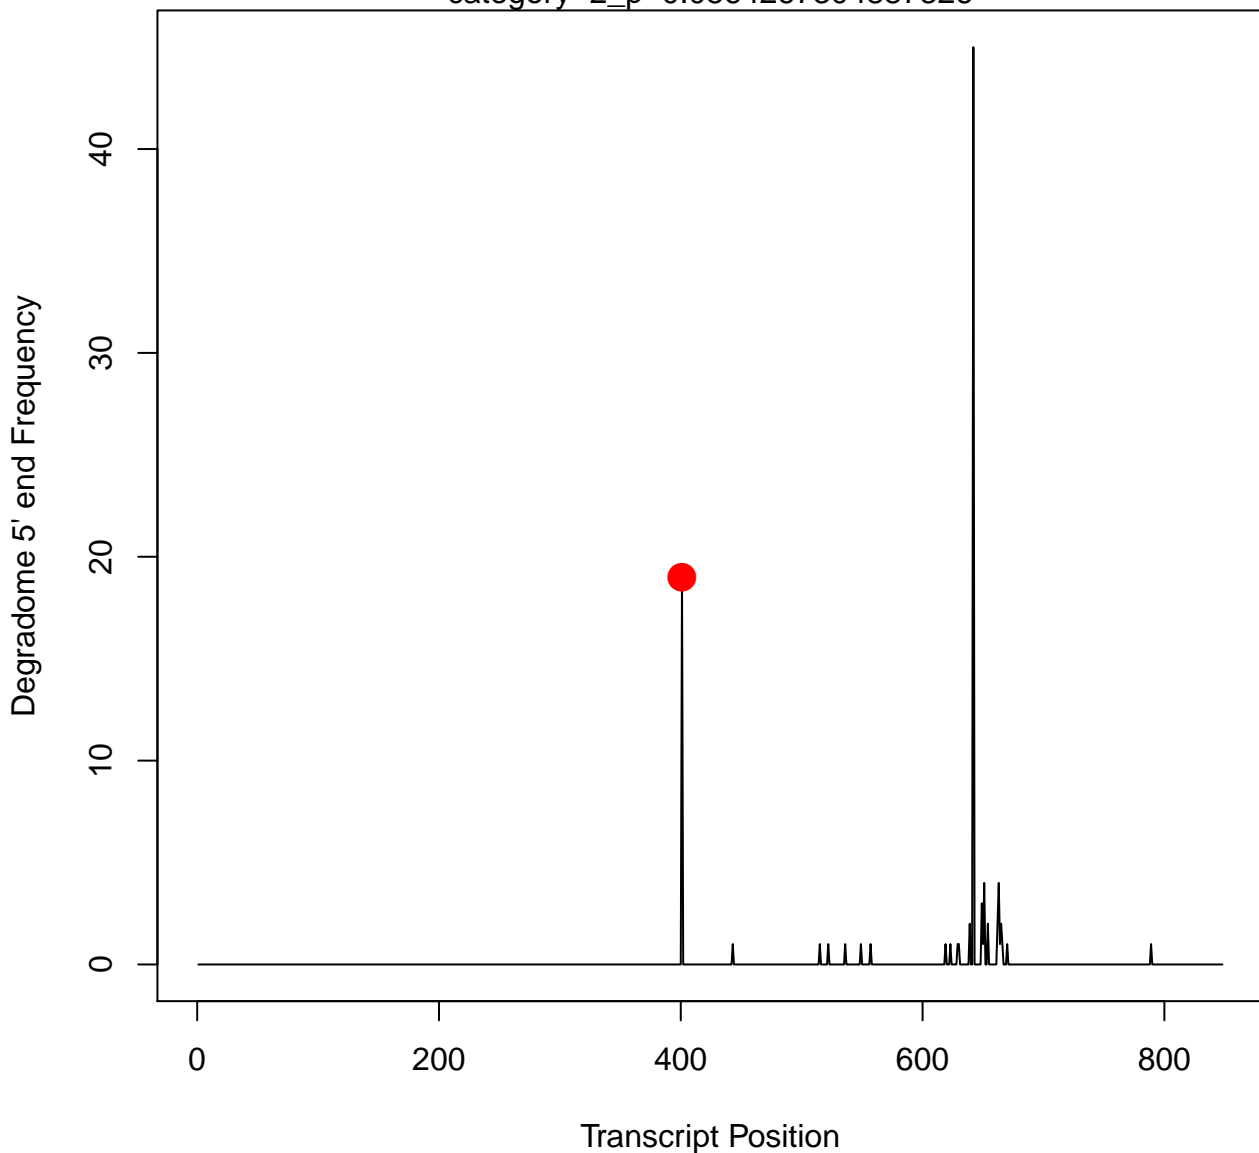

Supplement: s1 [file s1]

**T=Cluster-11009.0\_Q=novel\_21\_S=981**

category=0\_p=0.00136720107825572

Degradome 5' end Frequency

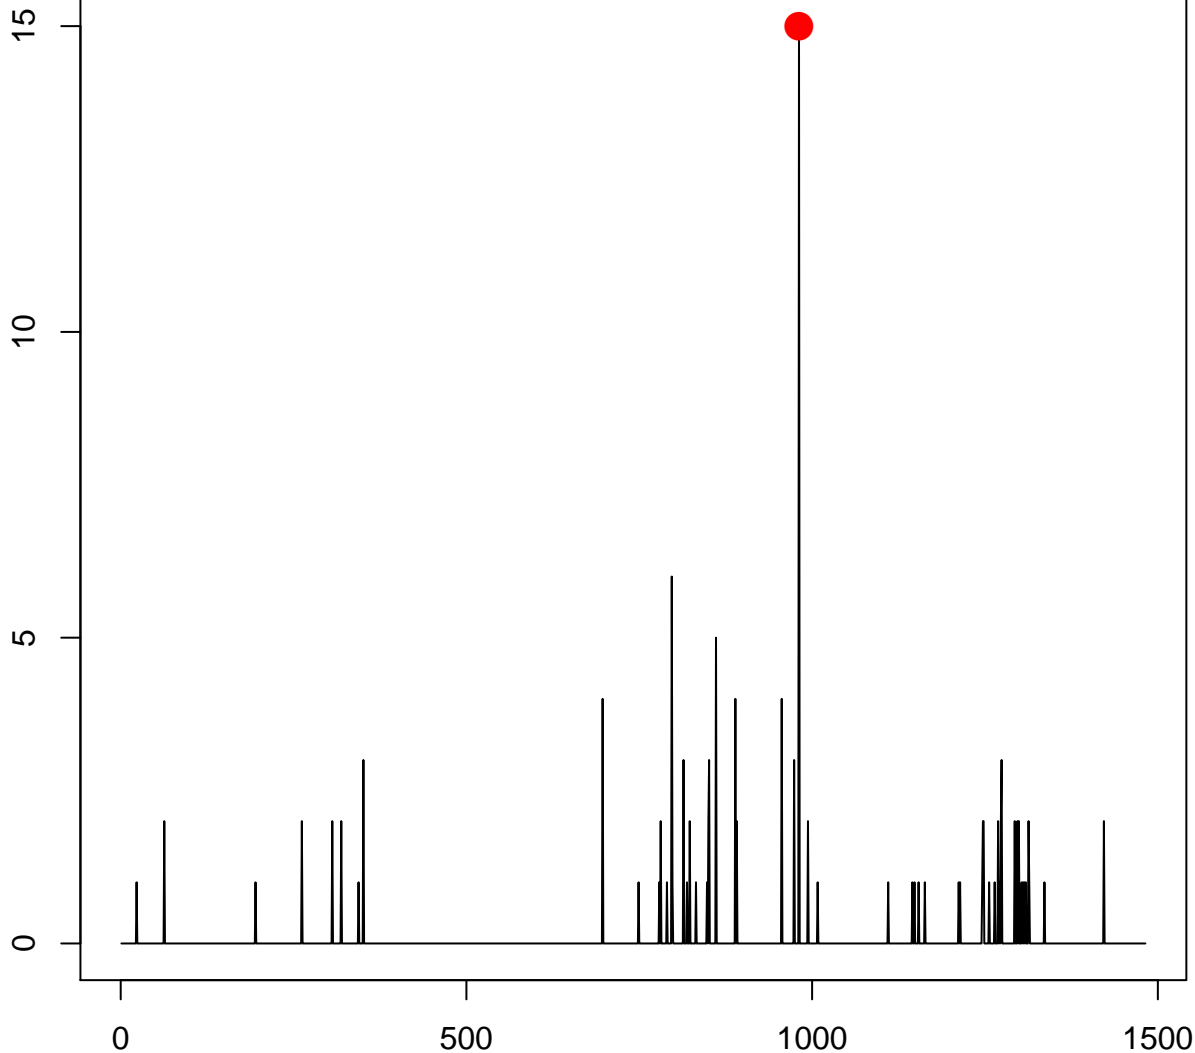

Transcript Position

Supplement: s1 [file s1]

**T=Cluster-18410.10807\_Q=novel\_74\_S=680**

category=0\_p=0.005185427902343

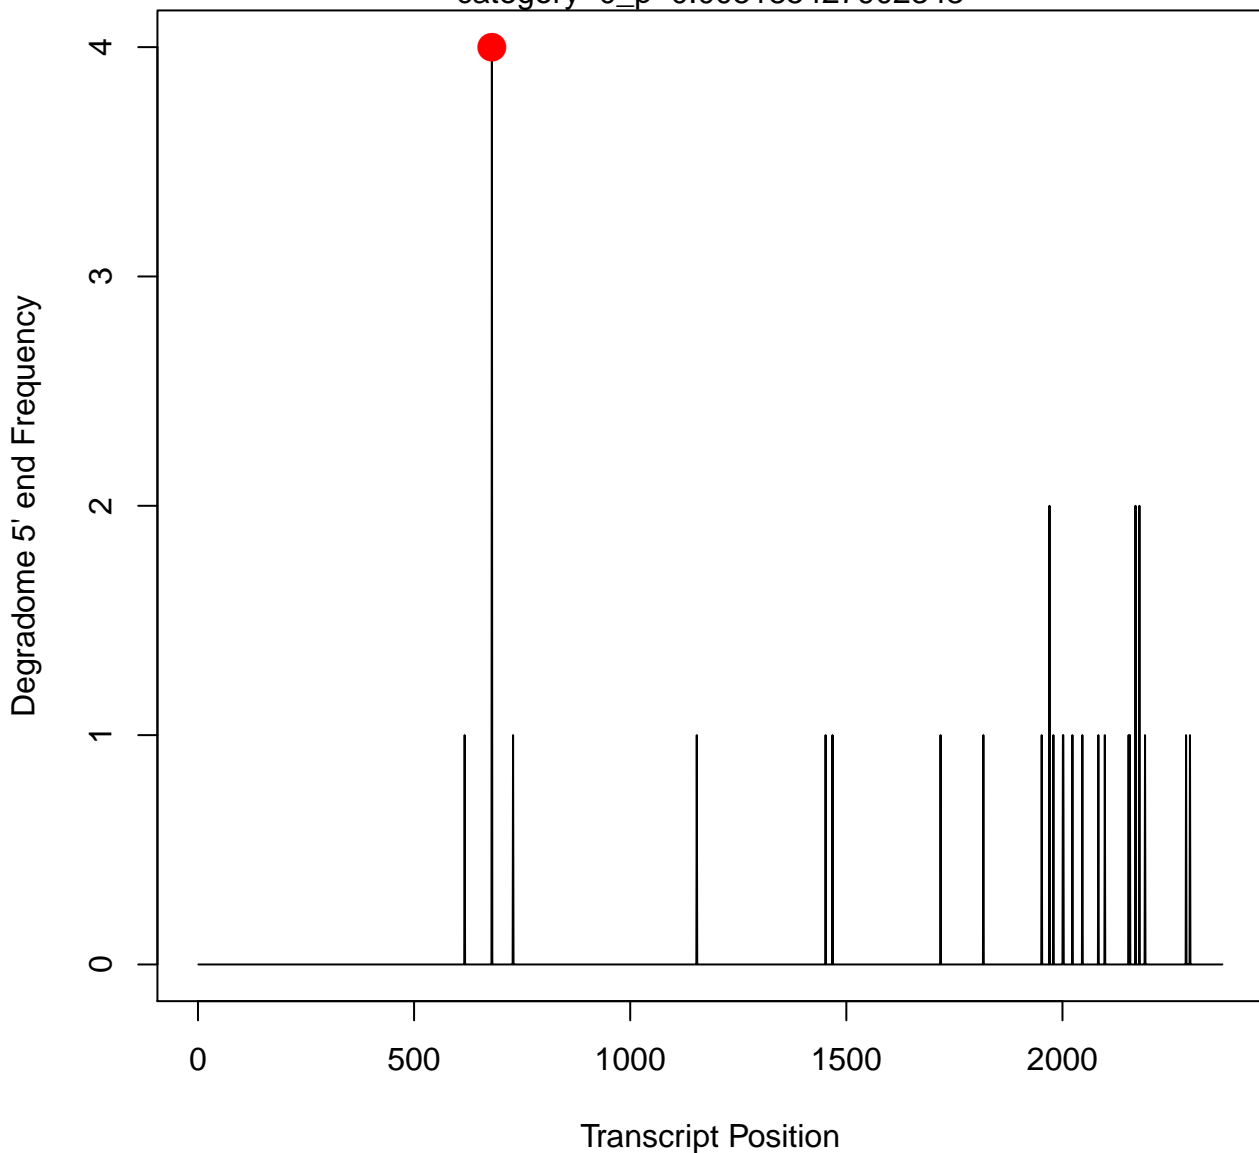

Supplement: s1 [file s1]

**T=Cluster-18410.39724\_Q=novel\_159\_S=755**

category=2\_p=0.0780956144108357

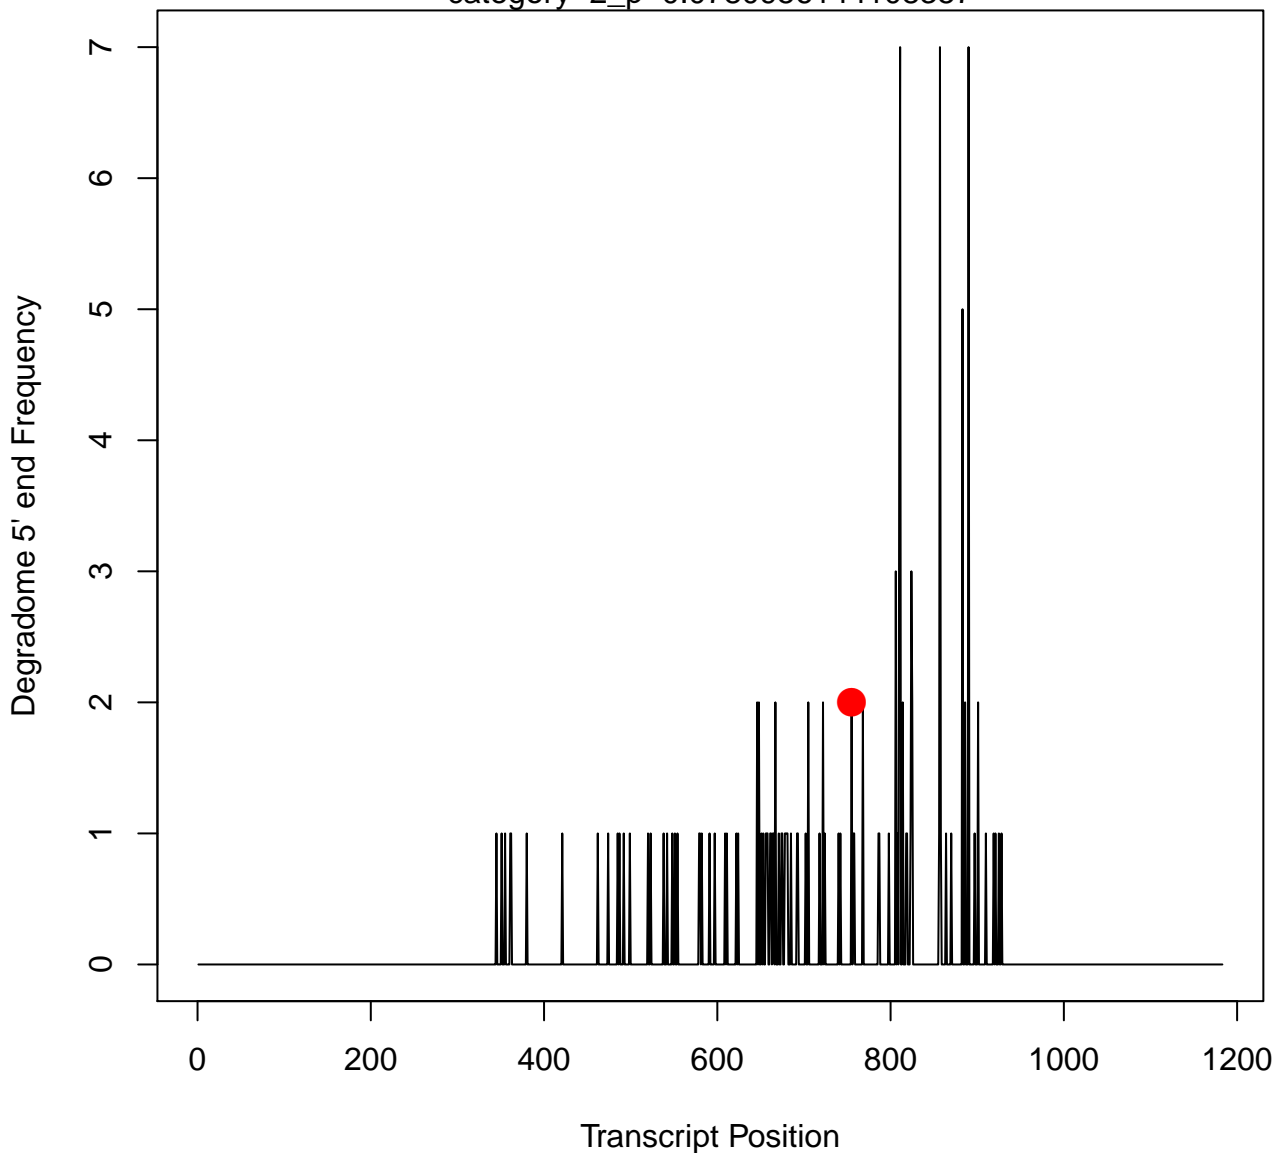

Supplement: s1 [file s1]

**T=Cluster-18410.12261\_Q=pma-miR1311\_S=192**

category=3\_p=0.0320427934108476

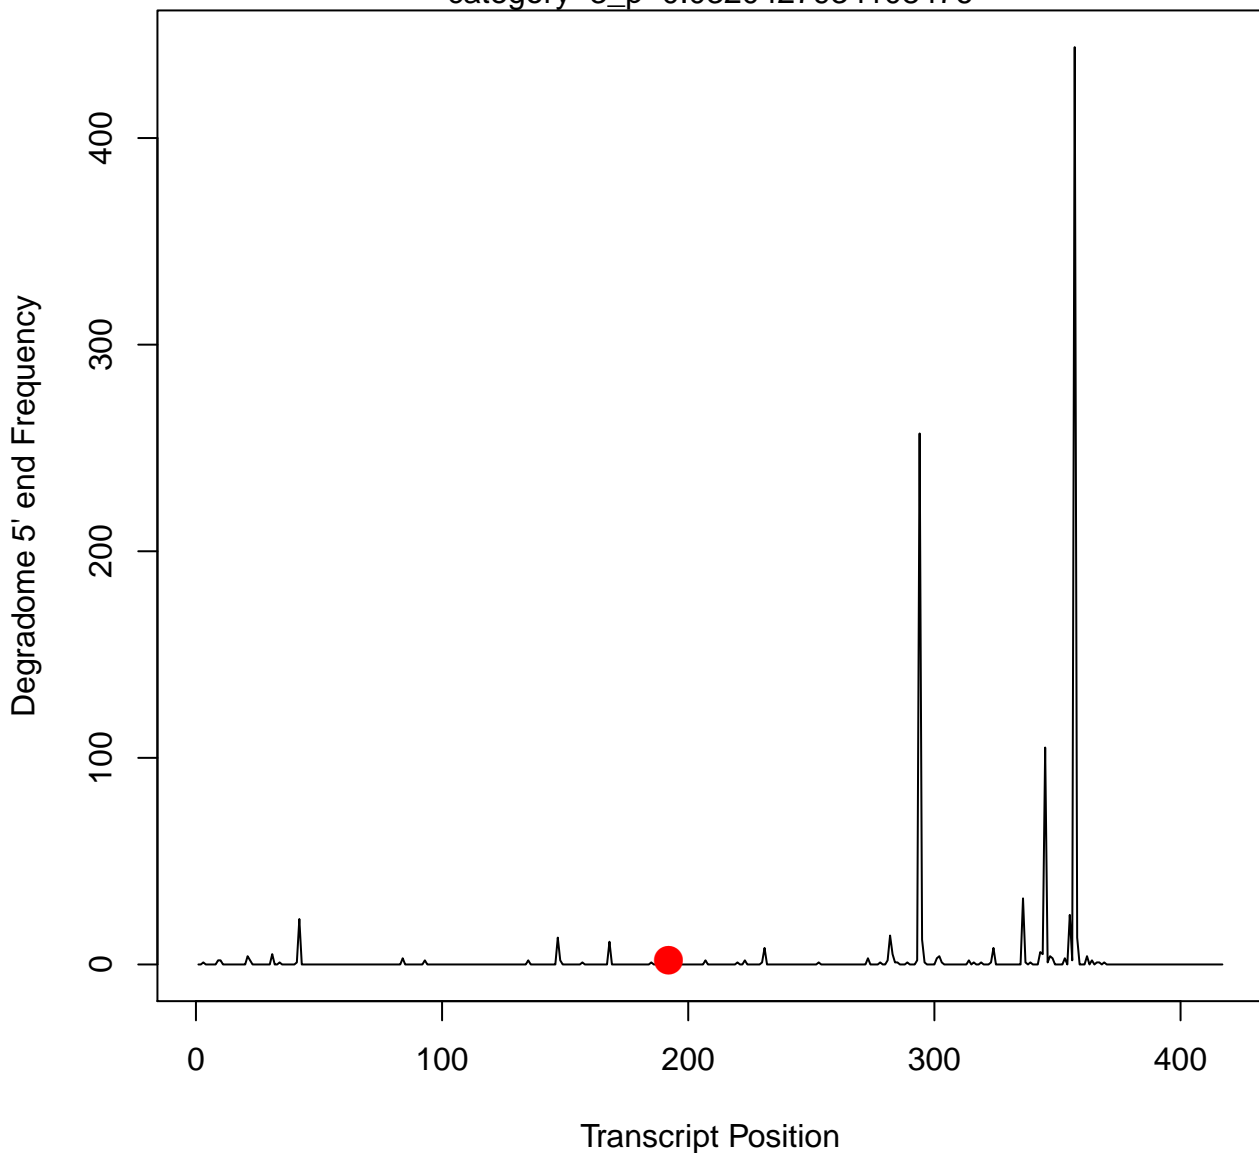

Supplement: s1 [file s1]

**T=Cluster-18410.91163\_Q=pma-miR951\_S=273**

category=0\_p=0.0224551117920671

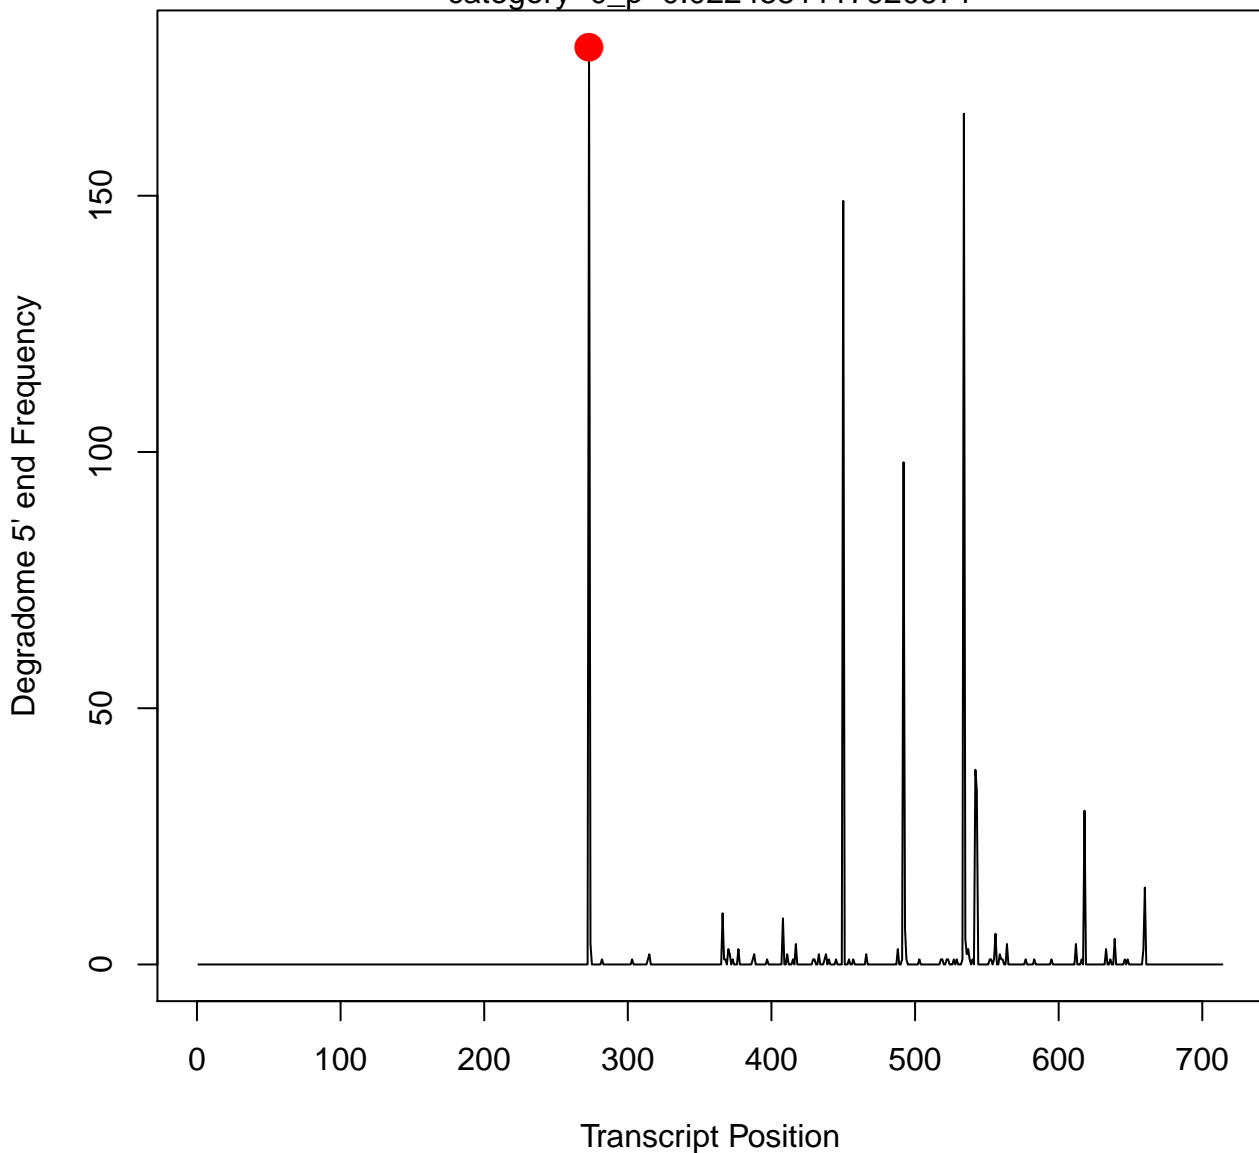

Supplement: s1 [file s1]

**T=Cluster-18410.98007\_Q=novel\_63\_S=1416**

category=3\_p=0.0424939132250566

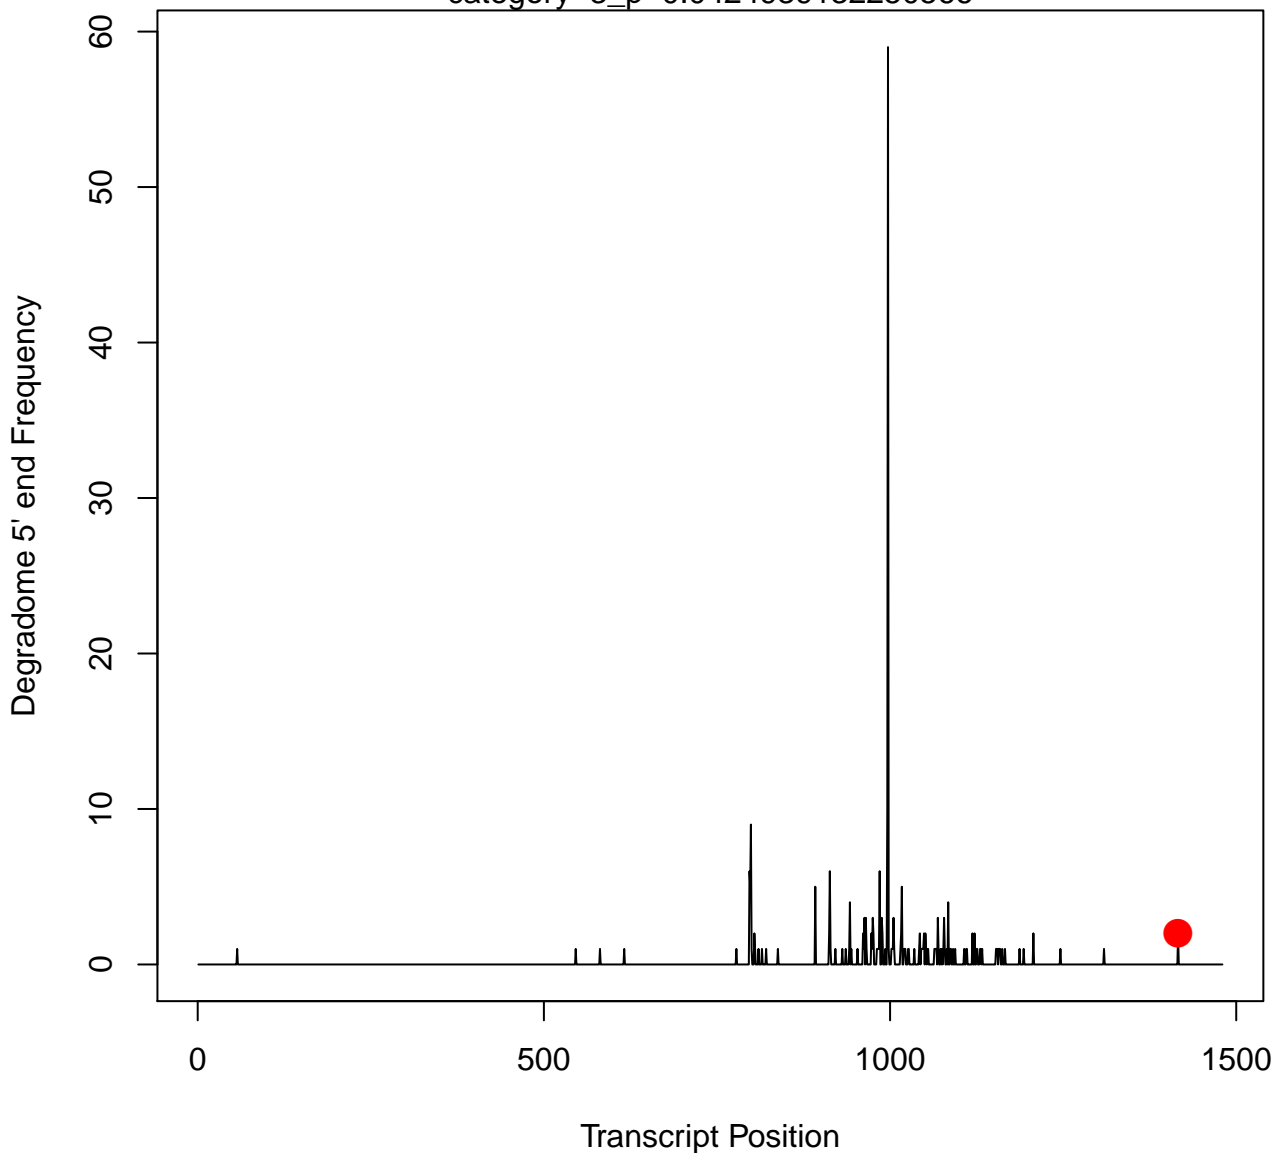

Supplement: s1 [file s1]

**T=Cluster-18410.44138\_Q=novel\_42\_S=1228**

category=0\_p=0.00218662432695249

Degradome 5' end Frequency

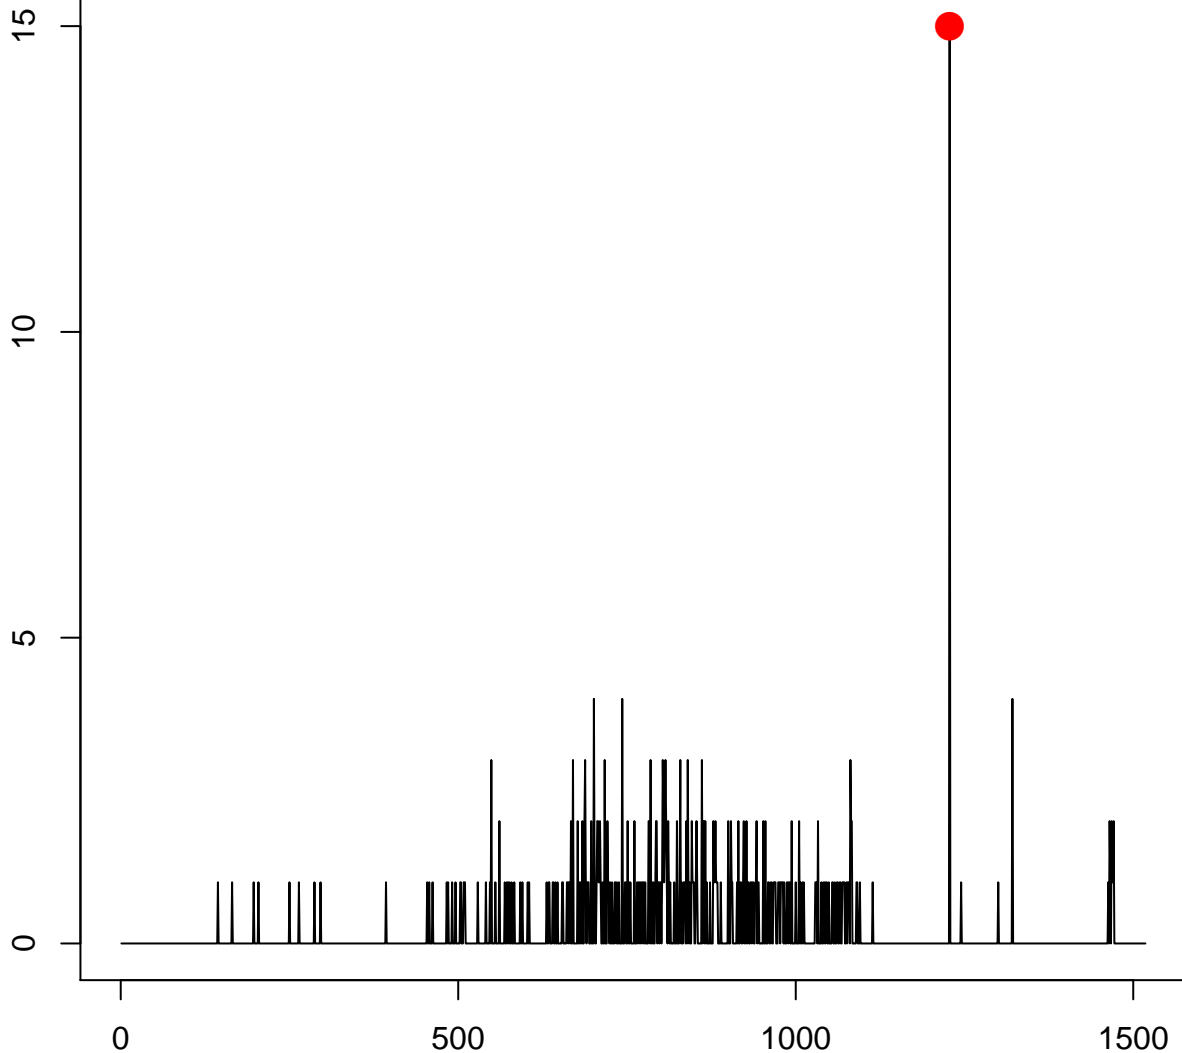

Transcript Position

Supplement: s1 [file s1]

**T=Cluster-18410.55513\_Q=novel\_92\_S=2145**

category=0\_p=0.00218662432695249

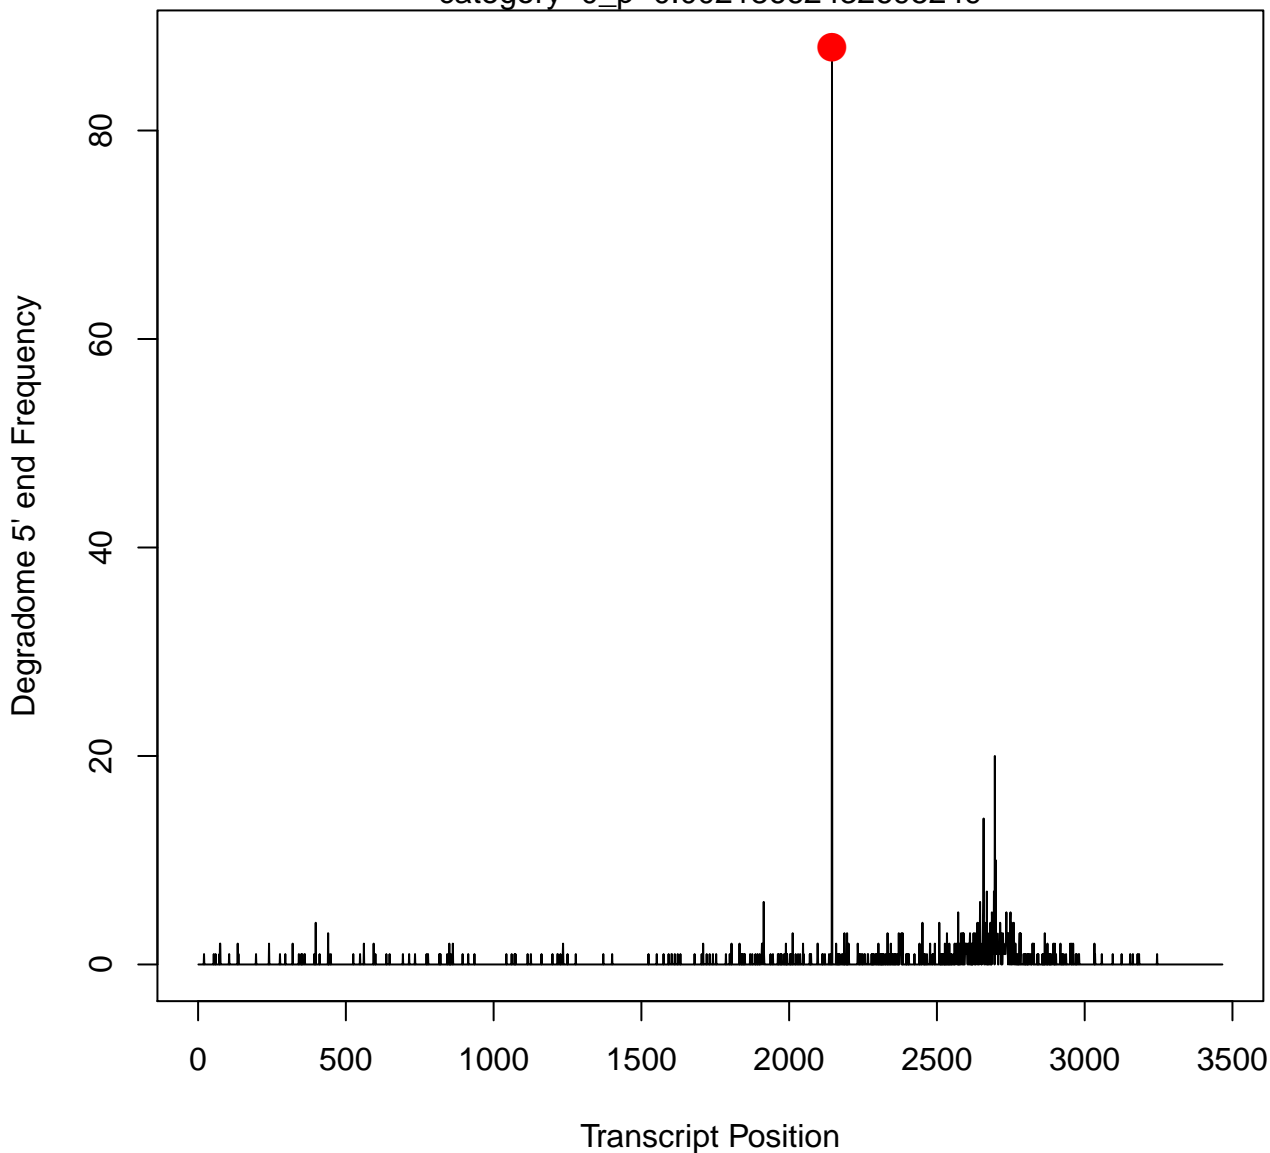

Supplement: s1 [file s1]

**T=Cluster-18410.43719\_Q=novel\_66\_S=822**

category=0\_p=0.00355083585007077

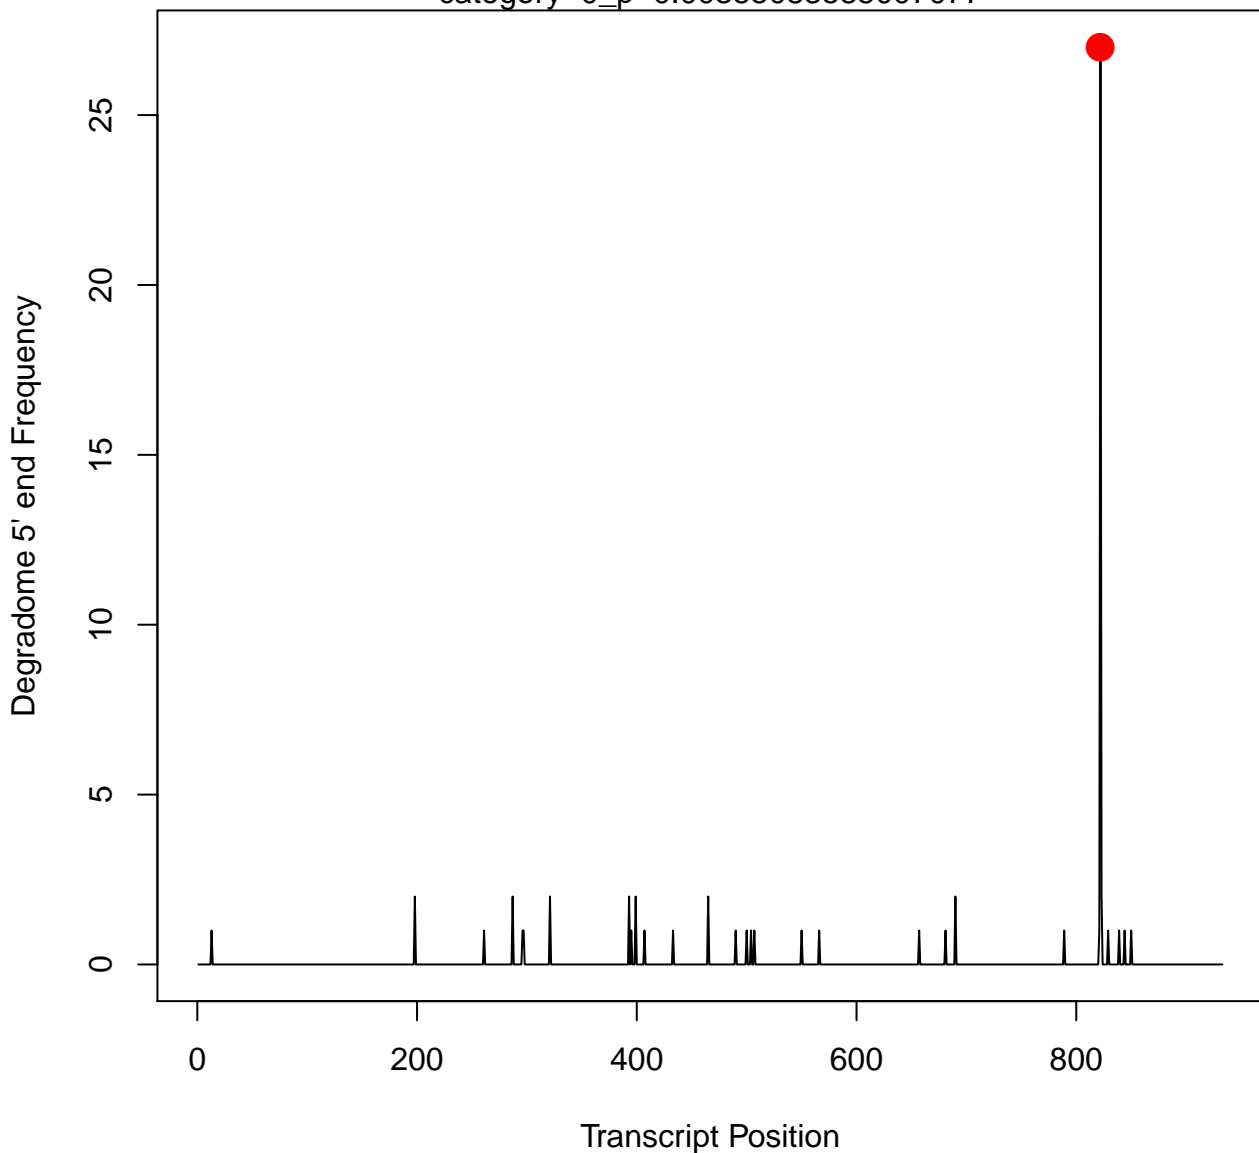

Supplement: s1 [file s1]

**T=Cluster-18410.61083\_Q=pma-miR946a-3p\_S=354**

category=0\_p=0.0535139901067667

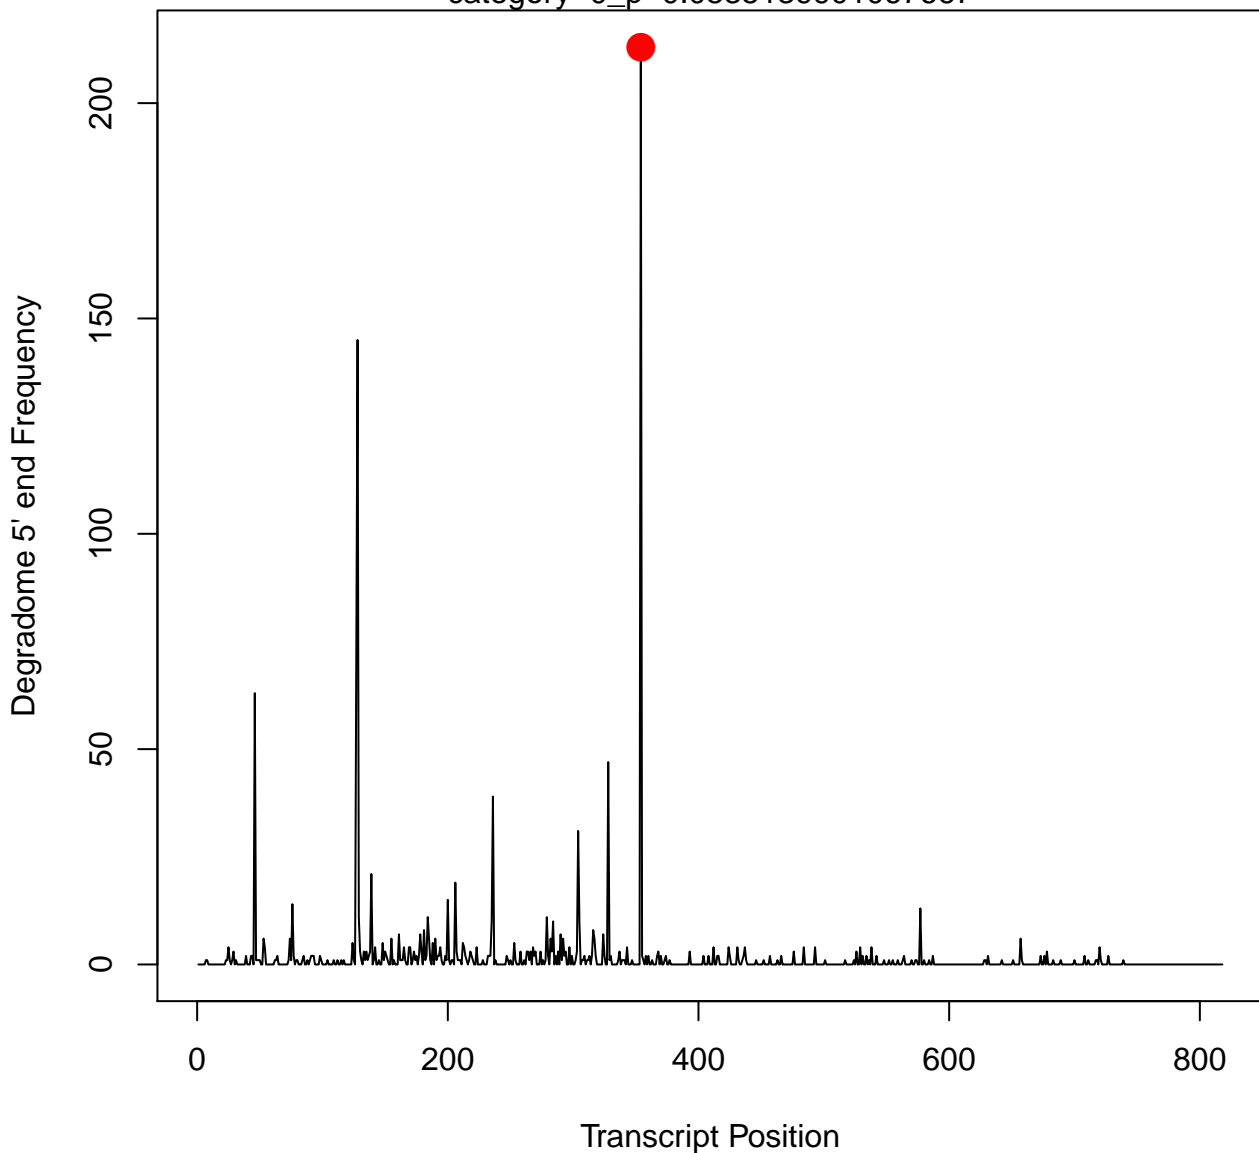

Supplement: s1 [file s1]

**T=Cluster-18410.58110\_Q=novel\_95\_S=69**

category=0\_p=0.000820545098840553

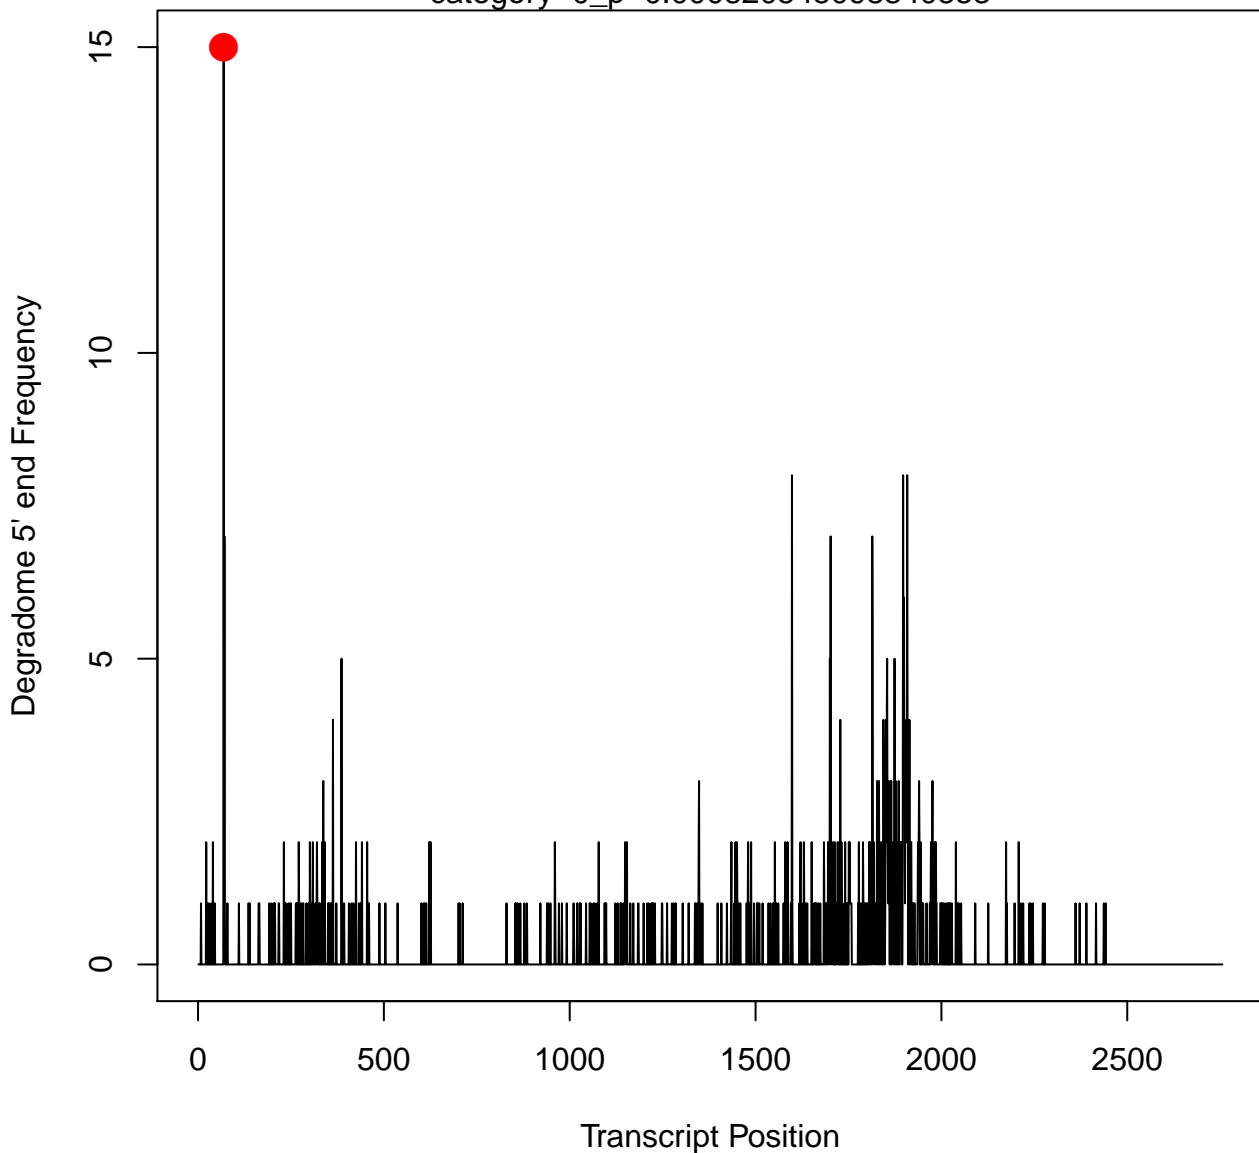

Supplement: s1 [file s1]

**T=Cluster-18410.93775\_Q=pma-miR1312\_S=443**

category=0\_p=0.00355083585007077

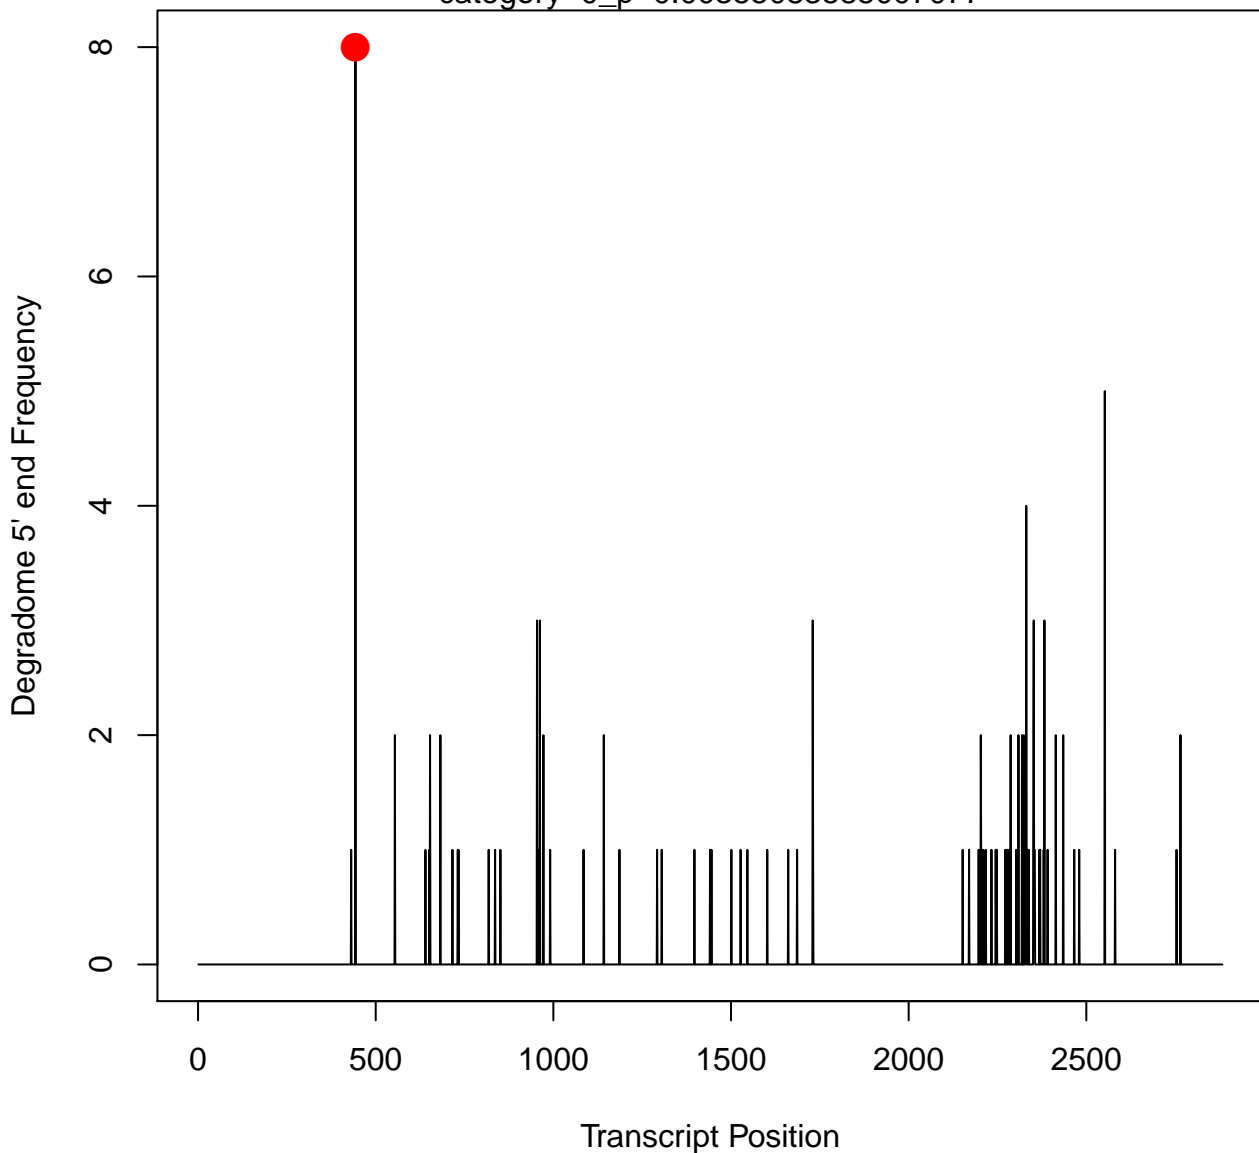

Supplement: s1 [file s1]

**T=Cluster-18410.93989\_Q=novel\_152\_S=2698**

category=2\_p=0.0342485307007228

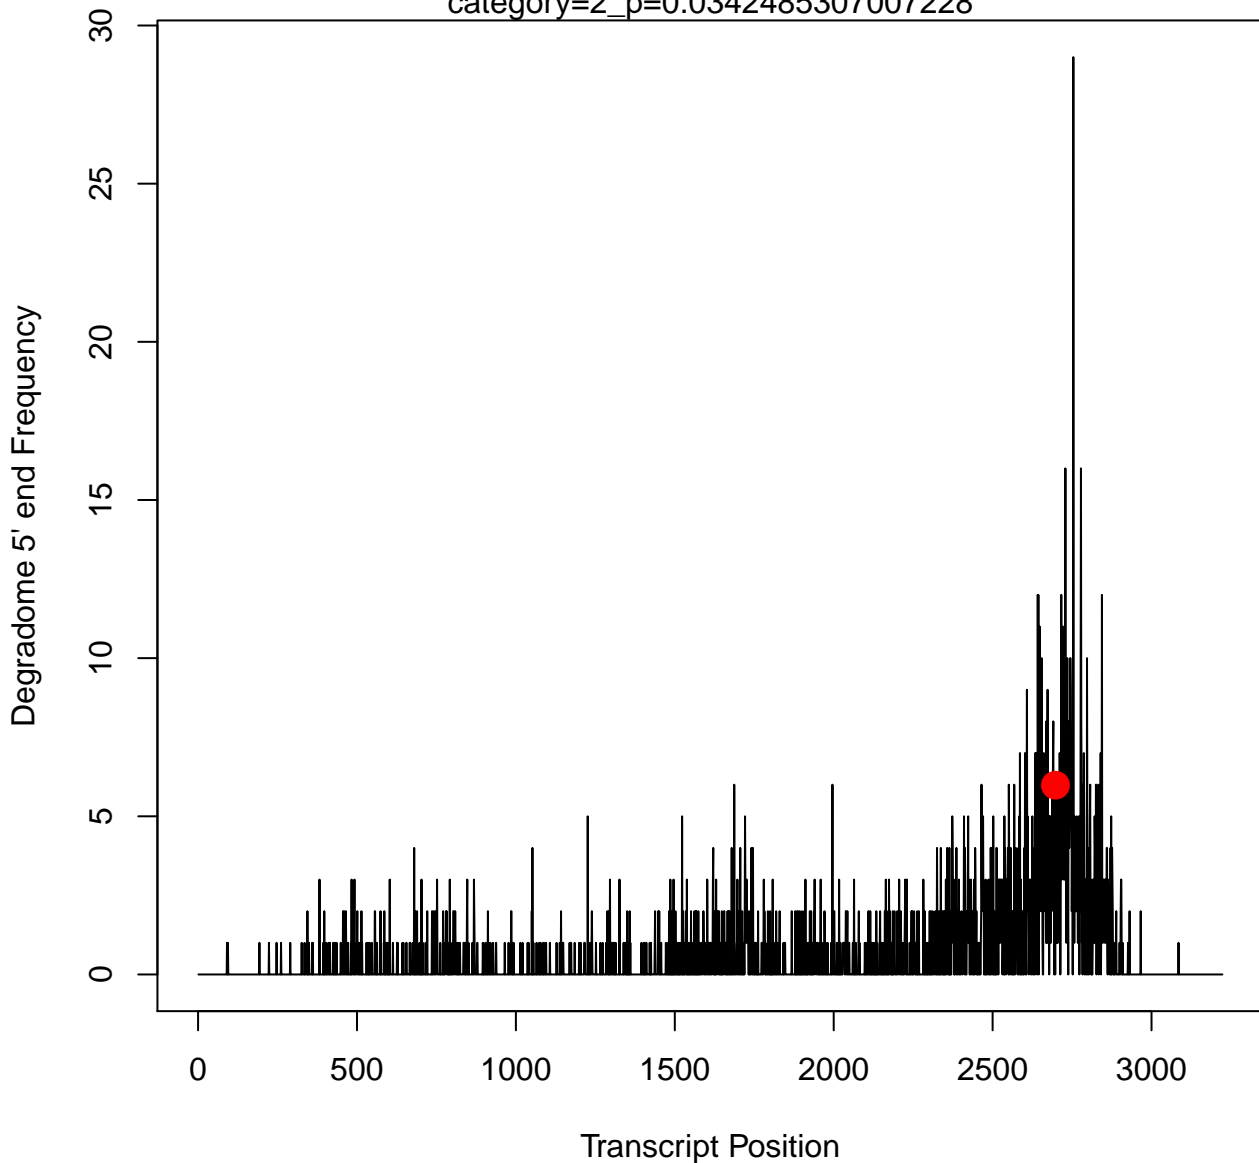

Supplement: s1 [file s1]

**T=Cluster-18410.13174\_Q=pma-miR951\_S=370**

category=0\_p=0.000547104903662499

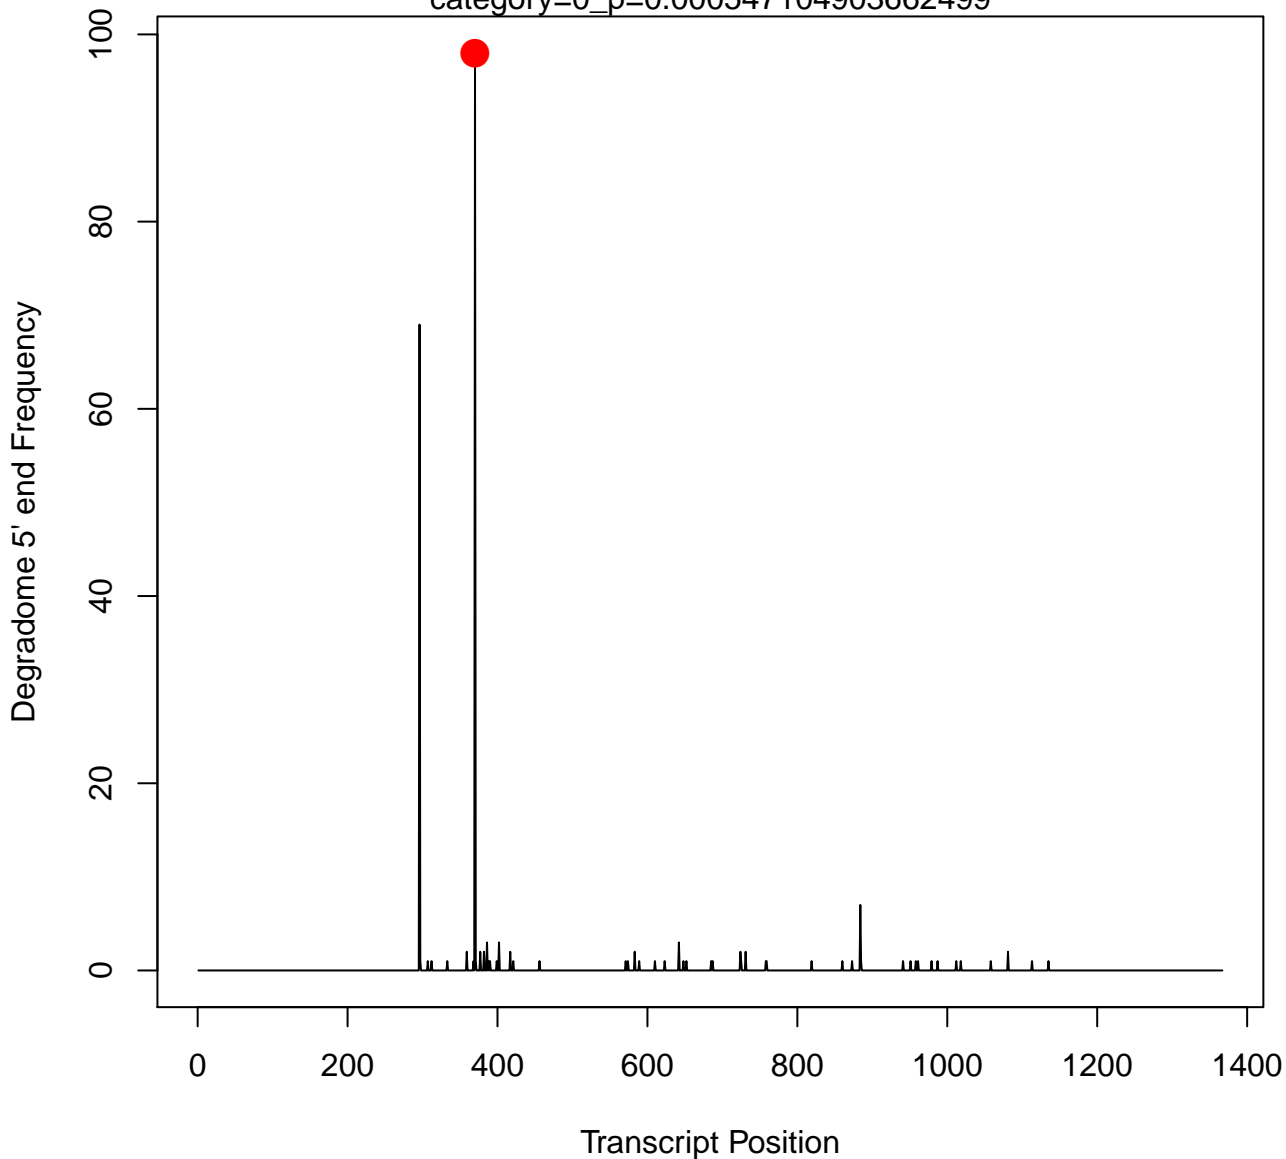

Supplement: s1 [file s1]

**T=Cluster-18410.49123\_Q=novel\_42\_S=208**

category=0\_p=0.00600171812373296

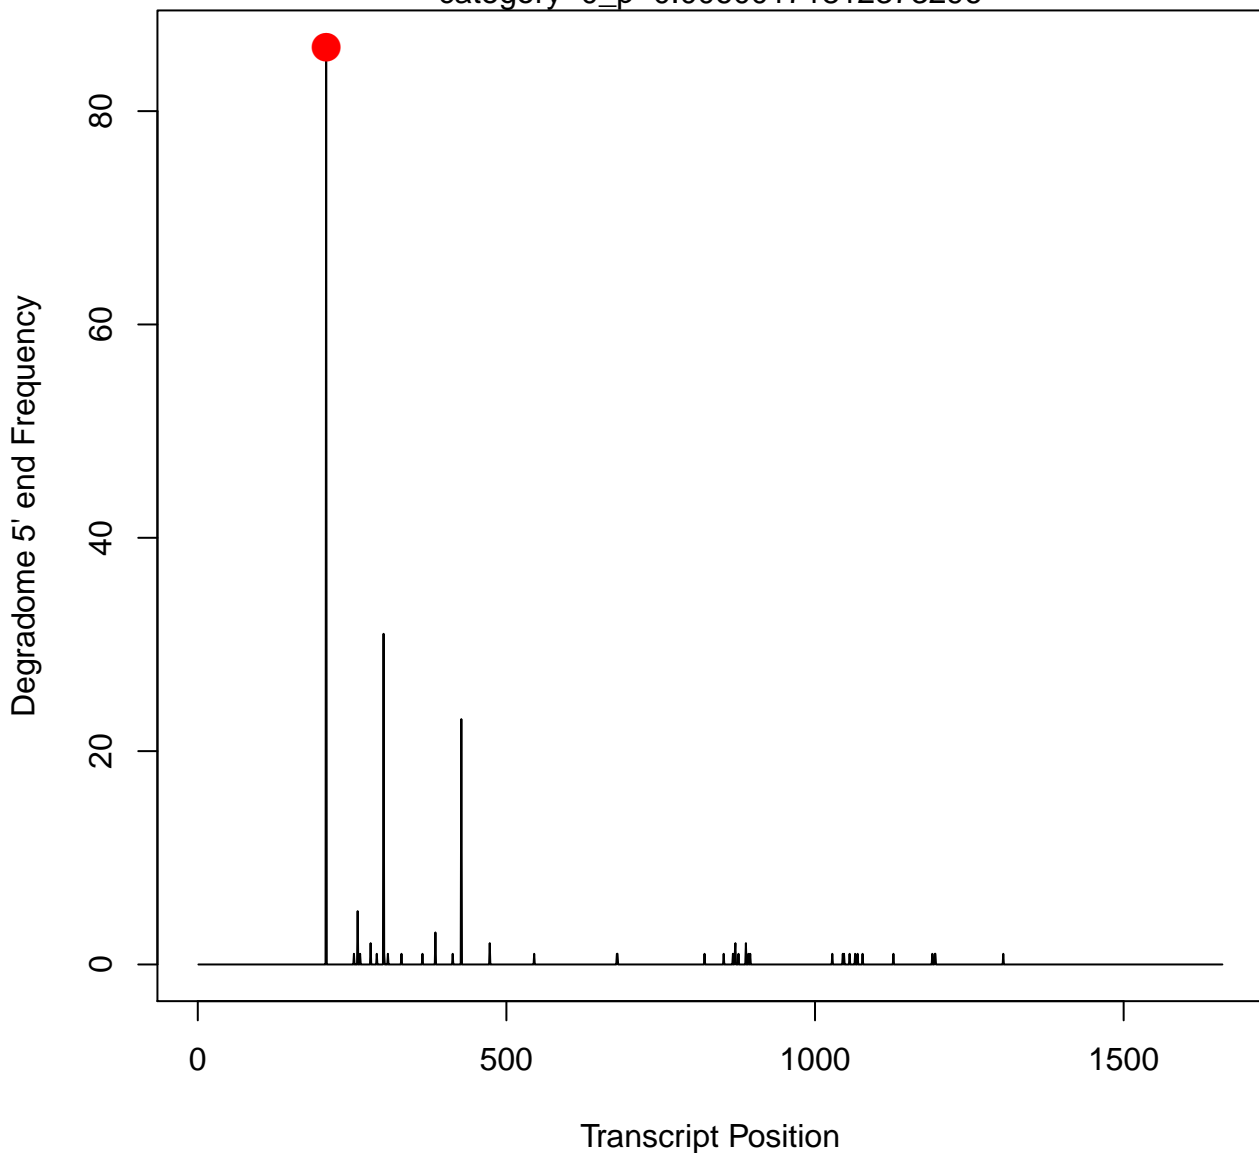

Supplement: s1 [file s1]

**T=Cluster-18410.48114\_Q=pma-miR1316\_S=1899**

category=0\_p=0.00355083585007077

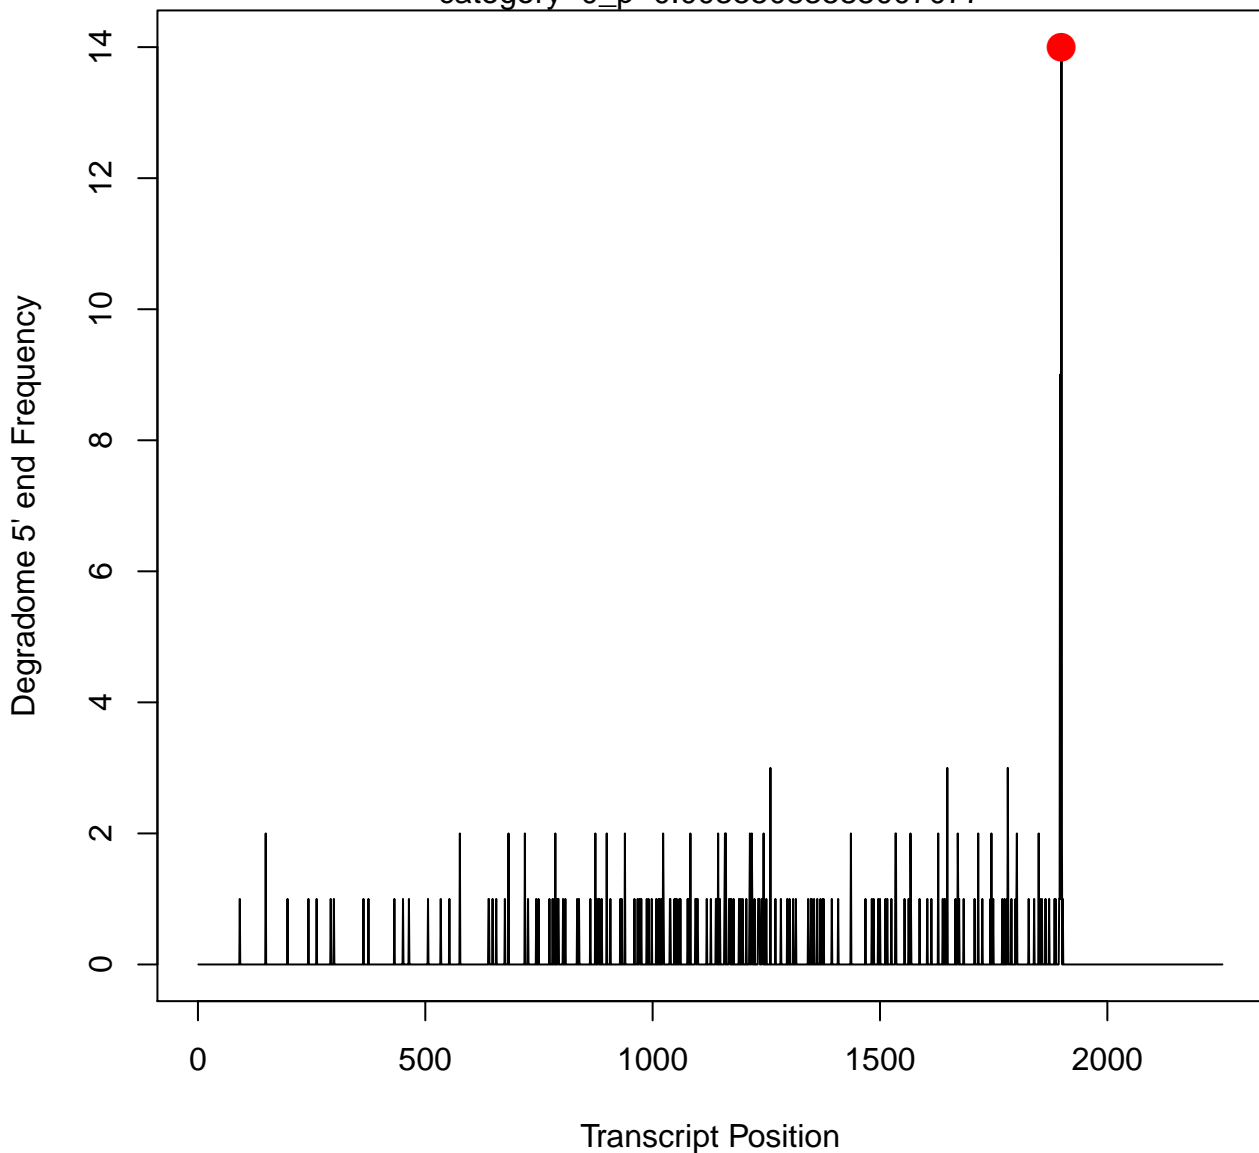

Supplement: s1 [file s1]

**T=Cluster-18410.75031\_Q=novel\_47\_S=727**

category=0\_p=0.00245961596621247

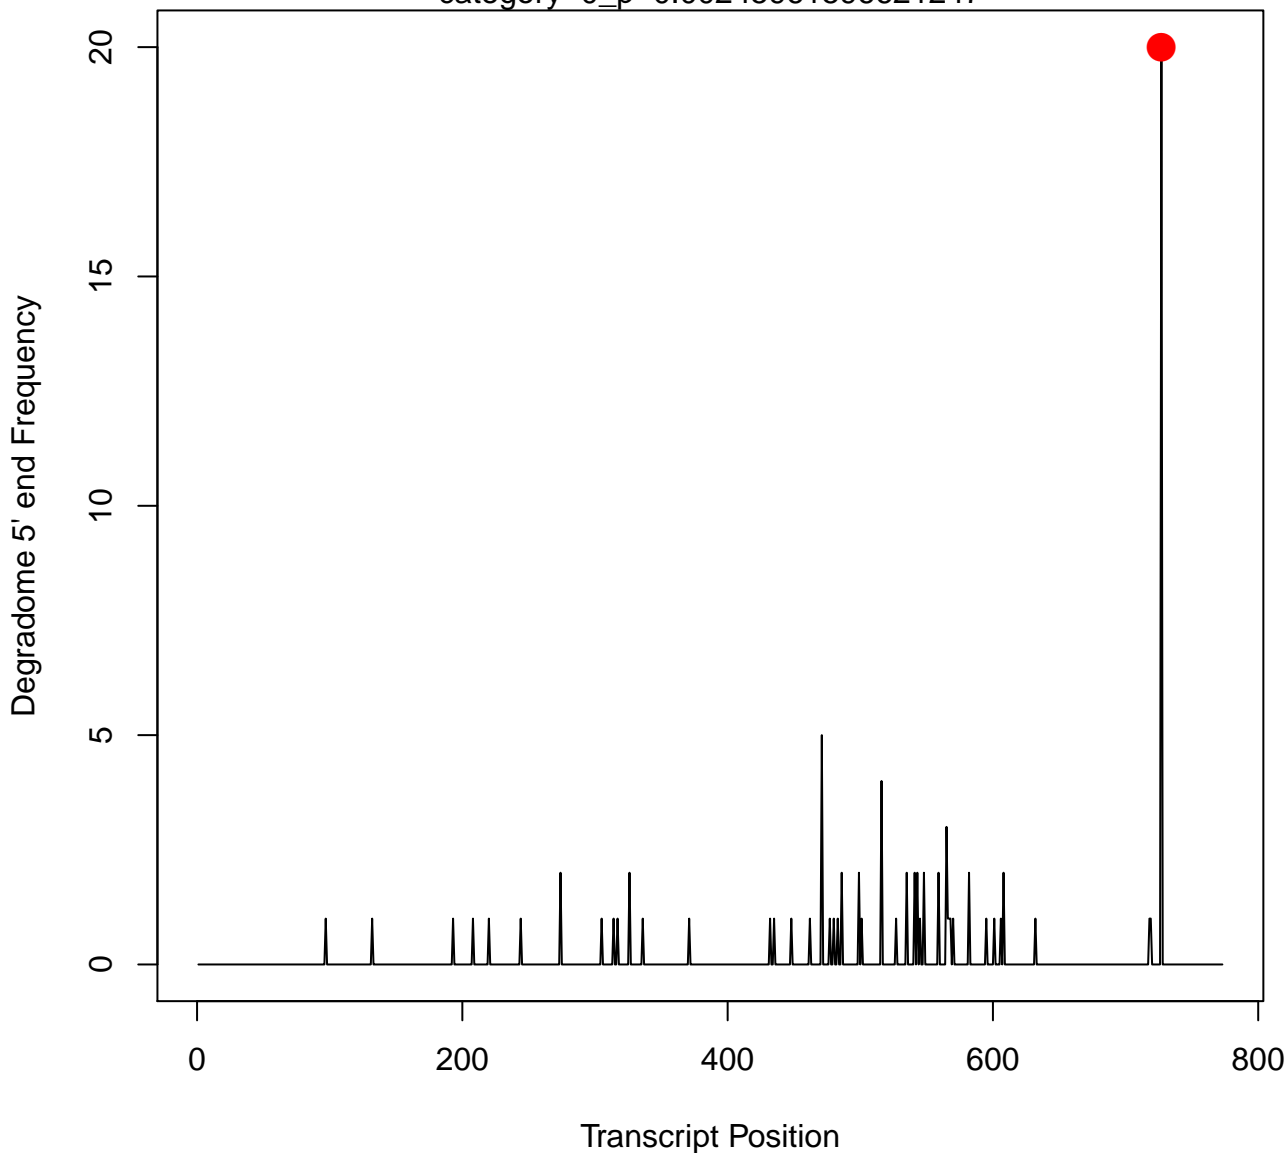

Supplement: s1 [file s1]

**T=Cluster-7653.0\_Q=novel\_8\_S=358**

category=0\_p=0.0235244583934175

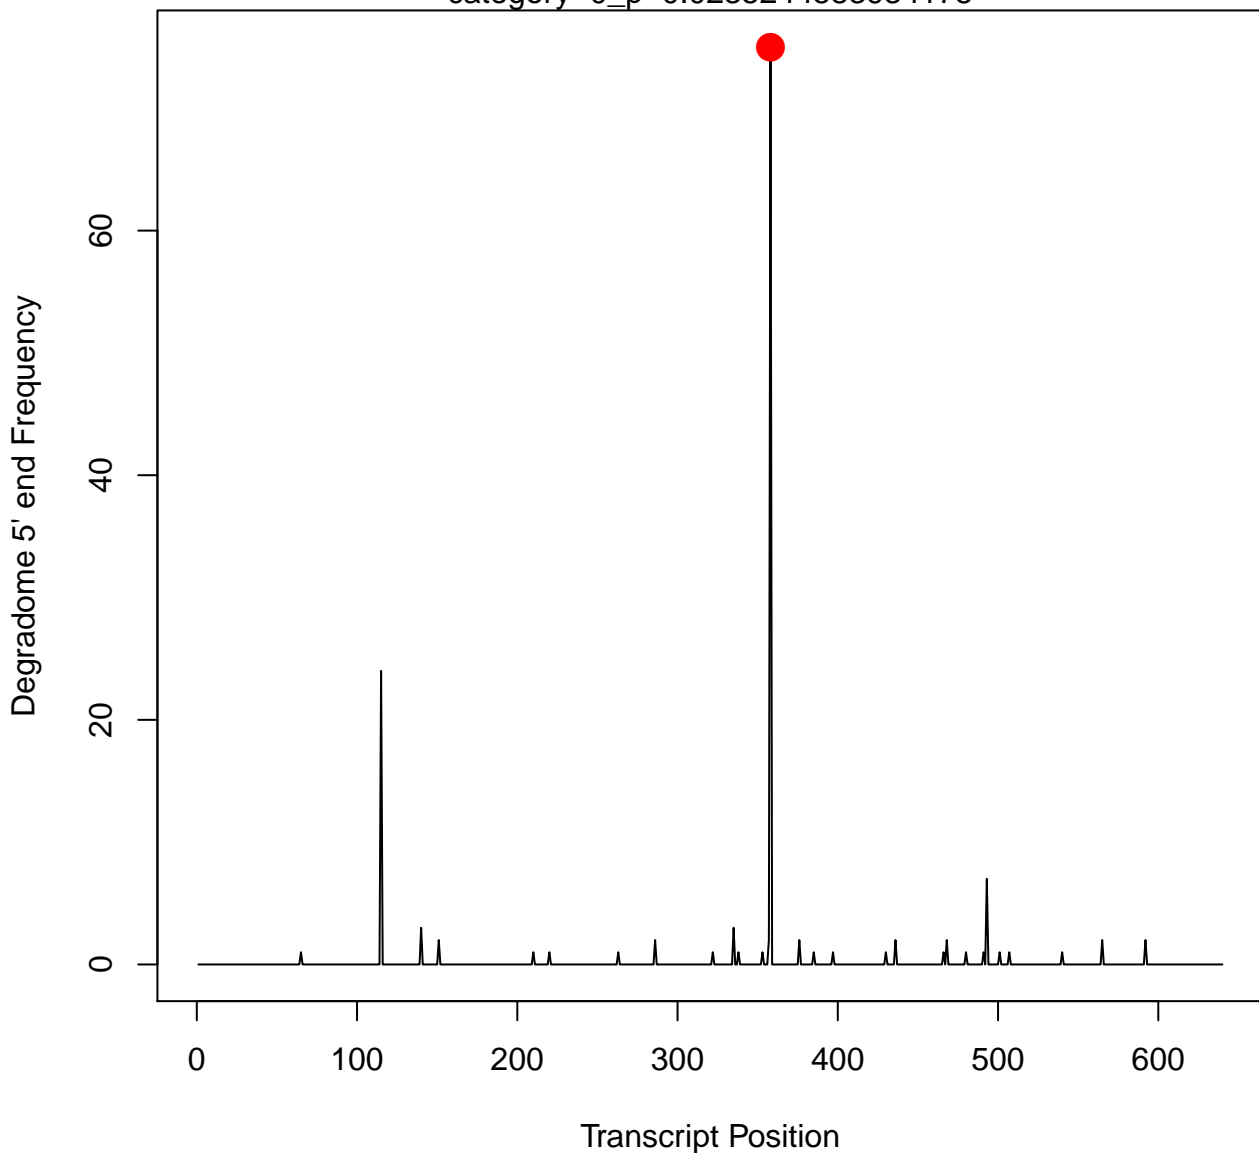

Supplement: s1 [file s1]

**T=Cluster-18410.65778\_Q=novel\_32\_S=925**

category=0\_p=0.00300537520191857

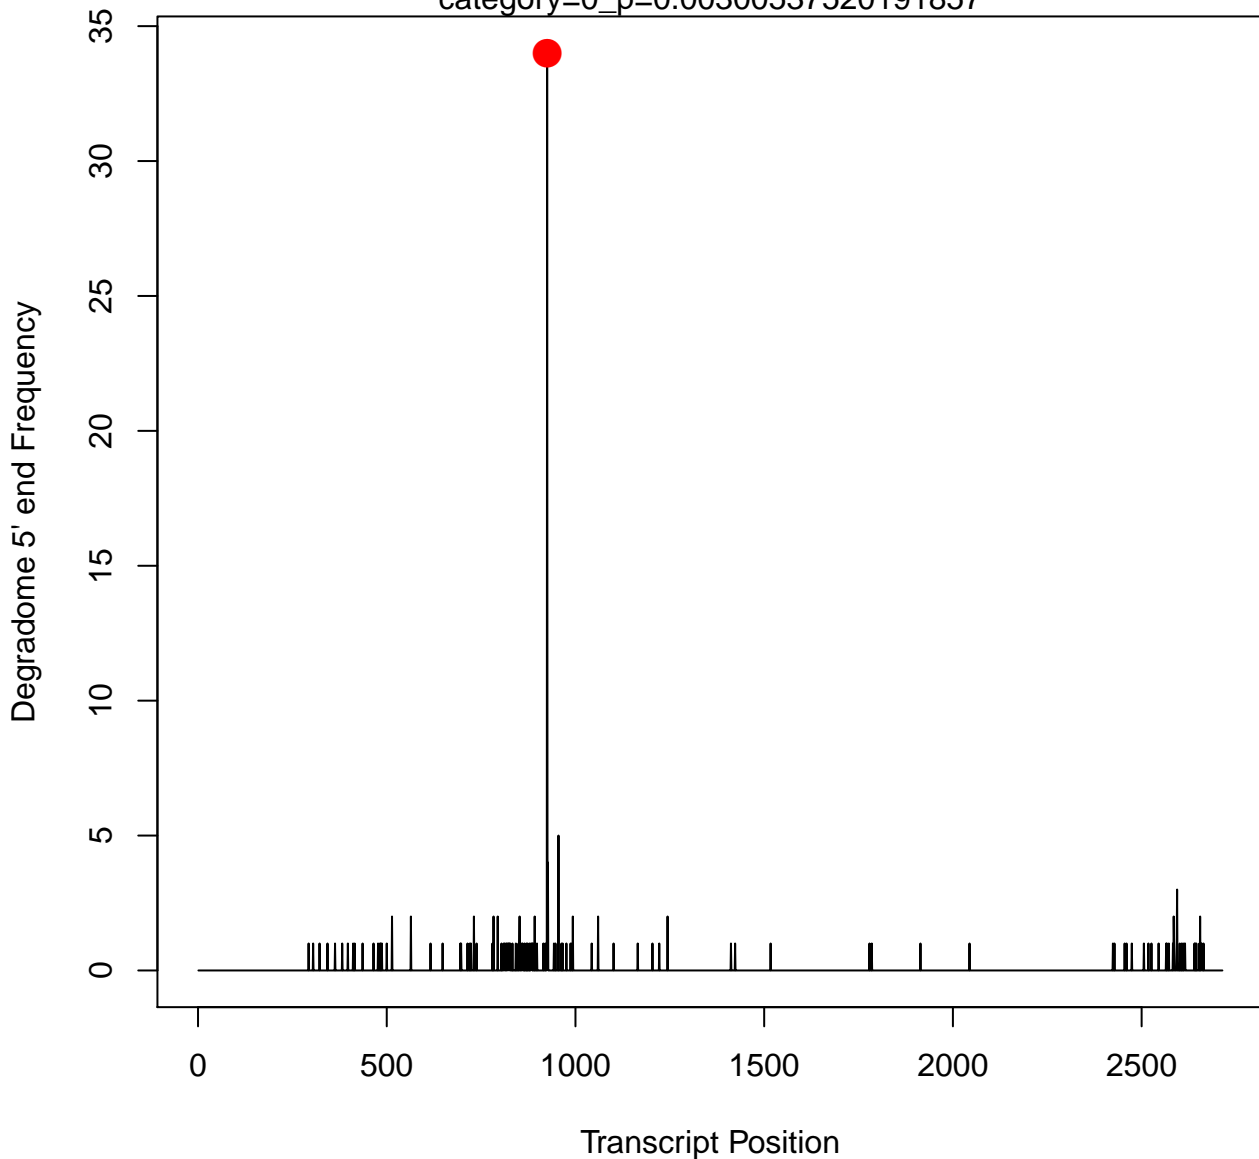

Supplement: s1 [file s1]

**T=Cluster-18410.22507\_Q=pma-miR1312\_S=588**

category=0\_p=0.0143975963466911

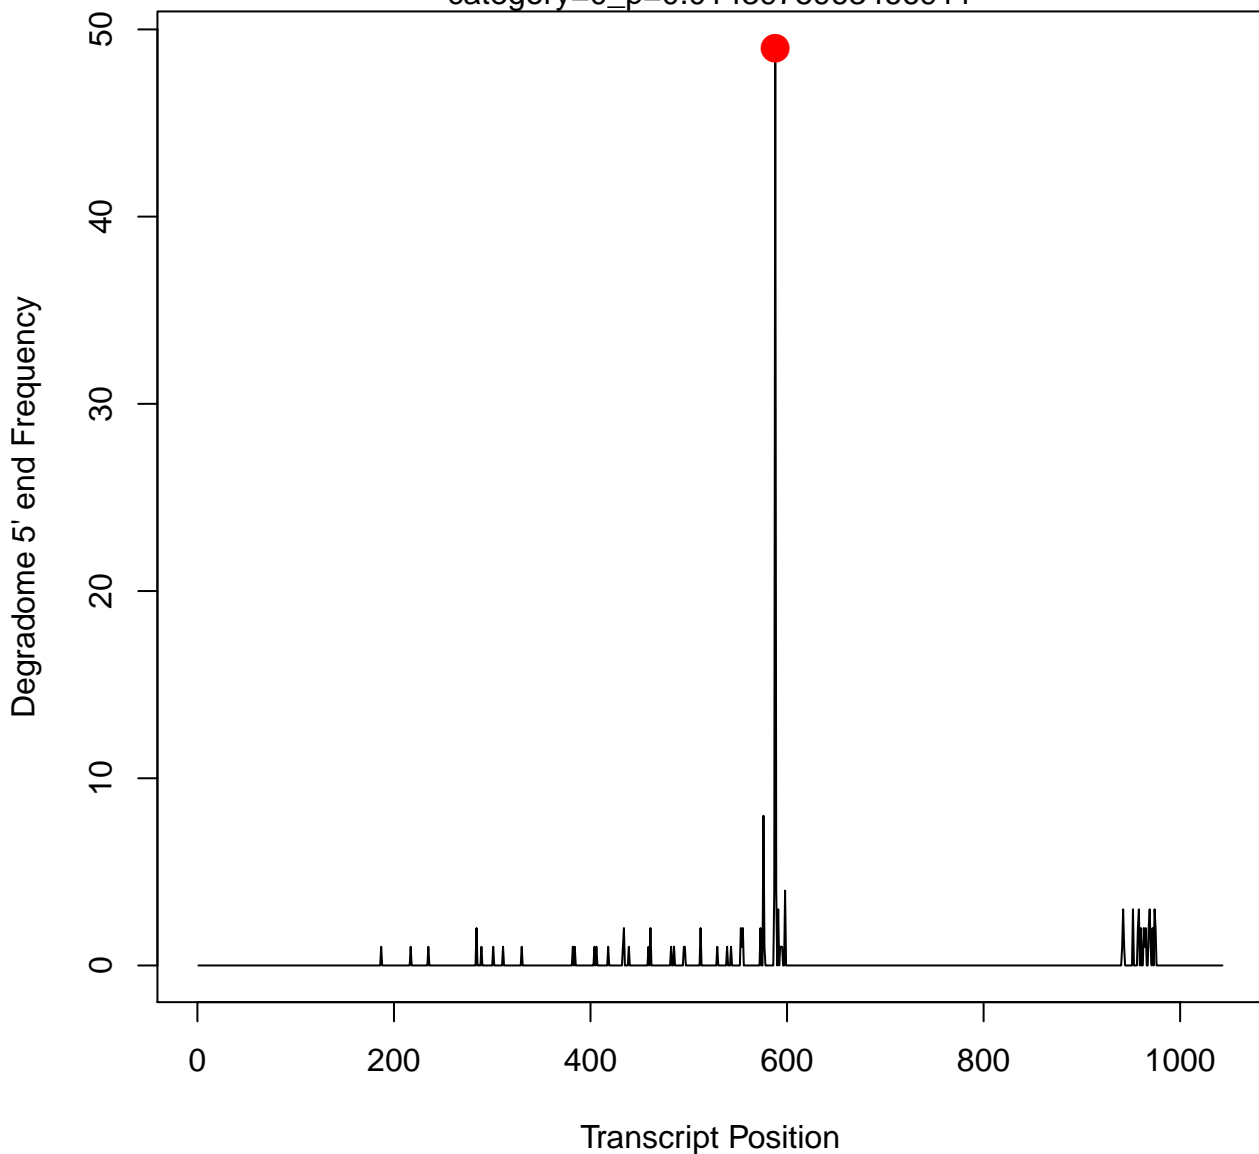

Supplement: s1 [file s1]

**T=Cluster-18410.98232\_Q=novel\_47\_S=143**

category=0\_p=0.0170907873584609

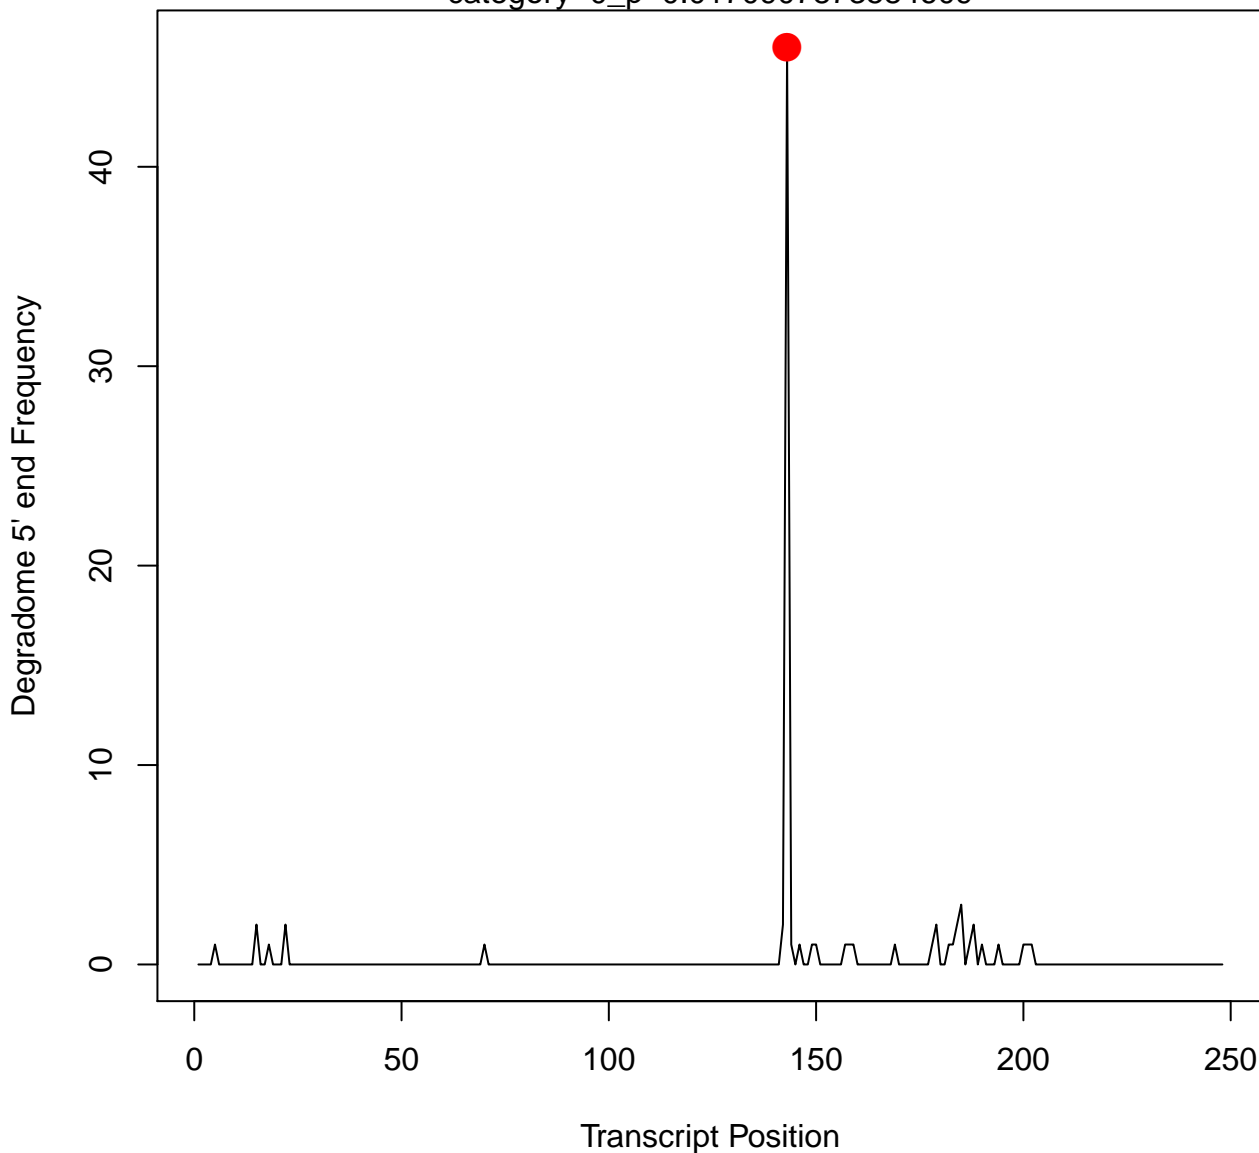

Supplement: s1 [file s1]

**T=Cluster-18410.66623\_Q=novel\_117\_S=539**

category=2\_p=0.0229647072699788

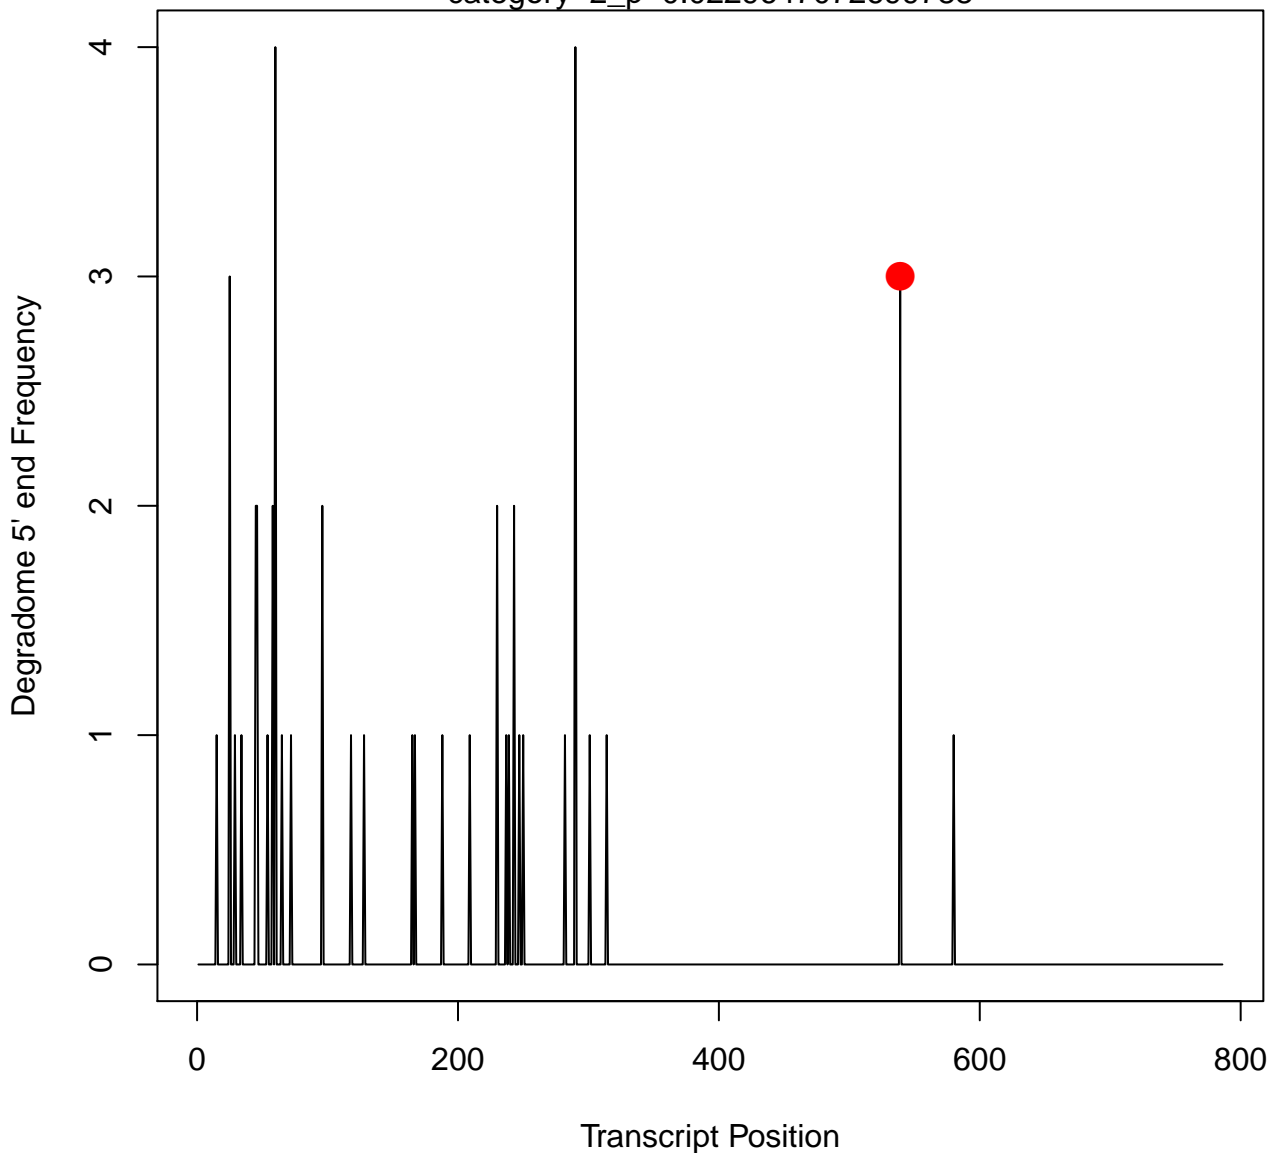

Supplement: s1 [file s1]

**T=Cluster-10732.0\_Q=pma-miR946a-3p\_S=359**

category=2\_p=0.0780956144108357

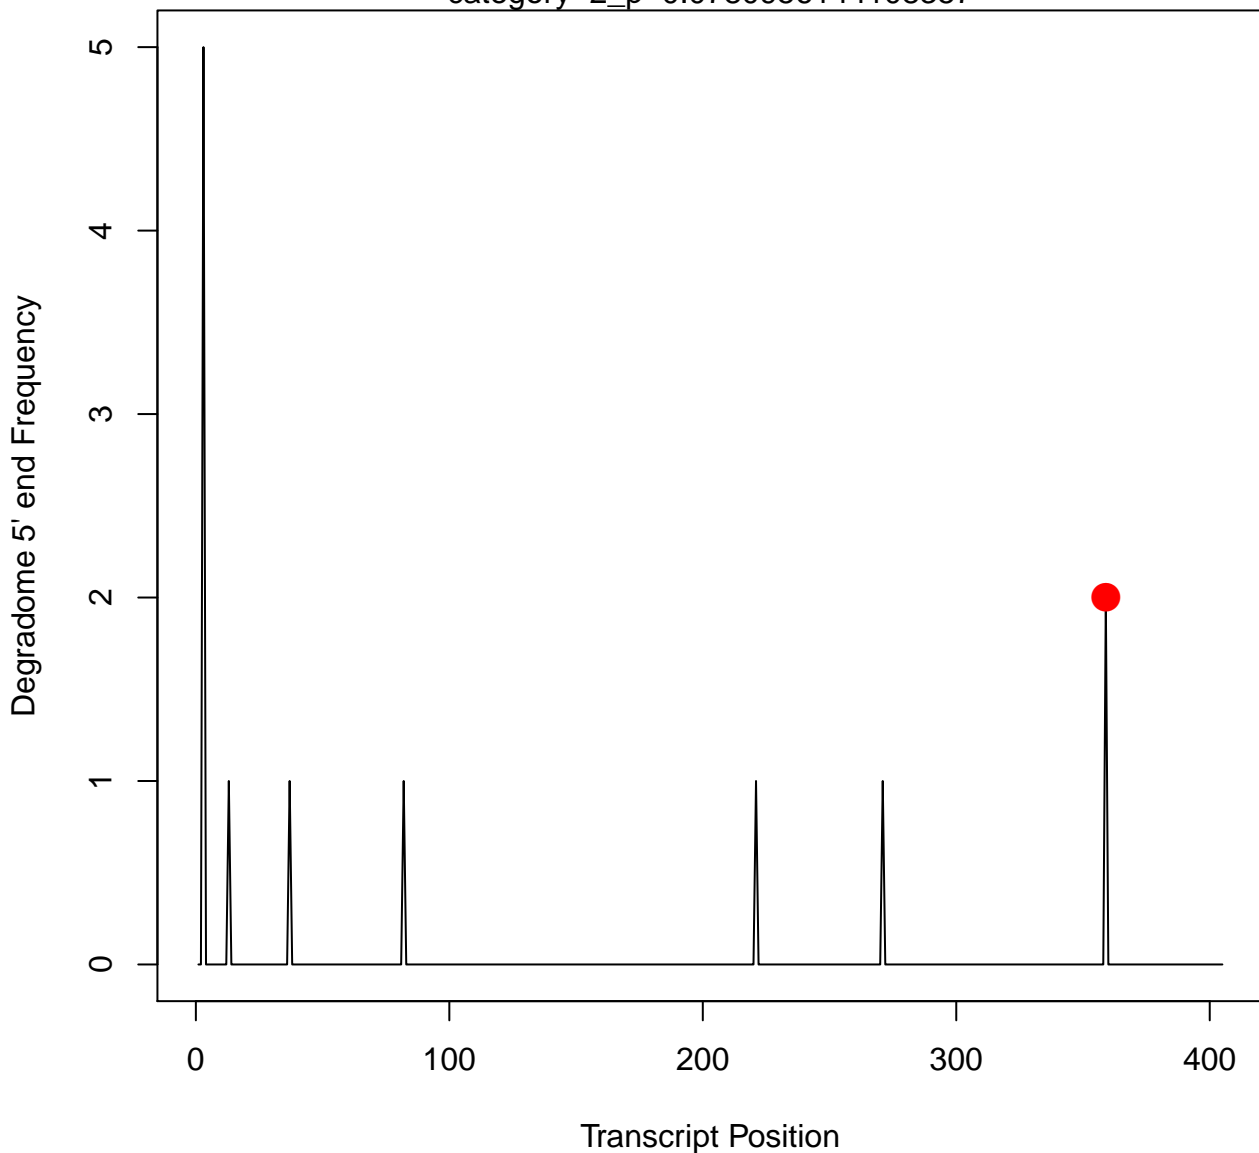

Supplement: s1 [file s1]

**T=Cluster-18410.45448\_Q=pma-miR946a-3p\_S=2629**

category=0\_p=0.0269917627532715

Degradome 5' end Frequency

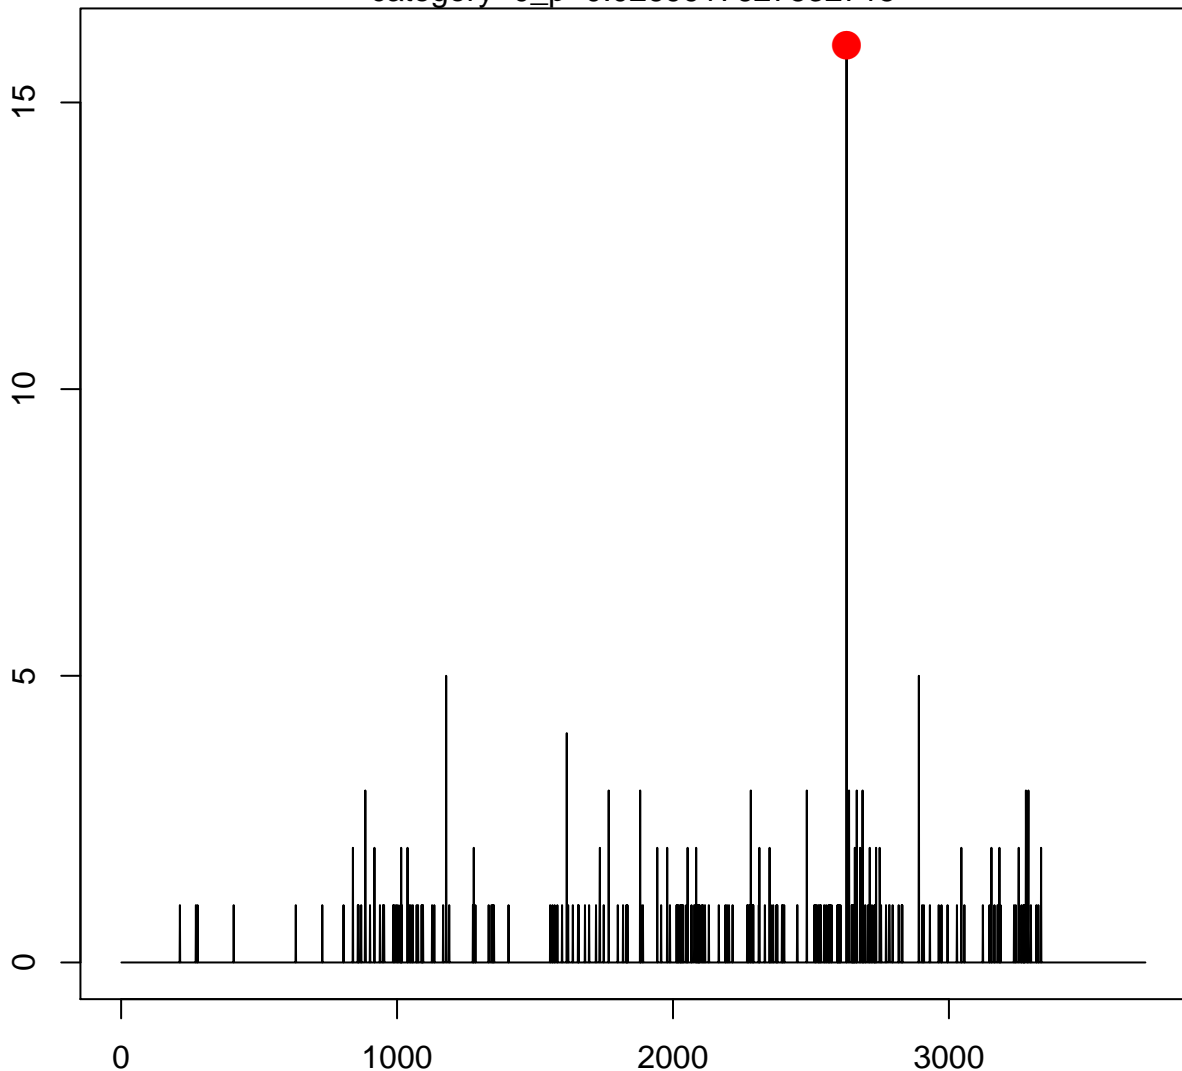

Transcript Position

Supplement: s1 [file s1]

**T=Cluster-14209.0\_Q=novel\_80\_S=287**

category=0\_p=0.0245926352253105

Degradome 5' end Frequency

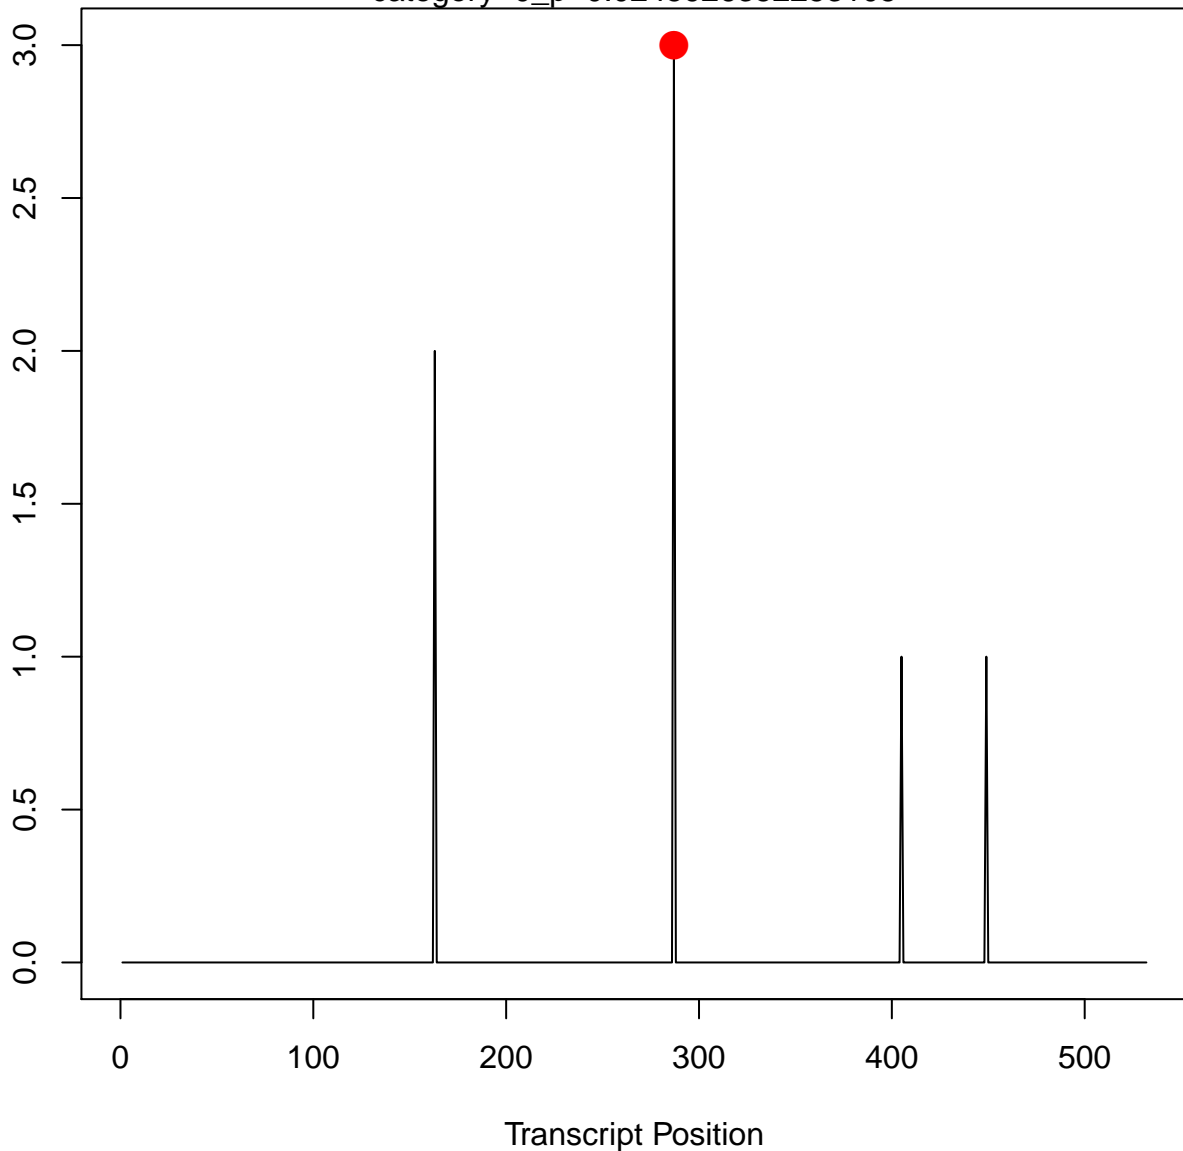

Supplement: s1 [file s1]

**T=Cluster-18410.24316\_Q=novel\_23\_S=1389**

category=0\_p=0.00109391048354923

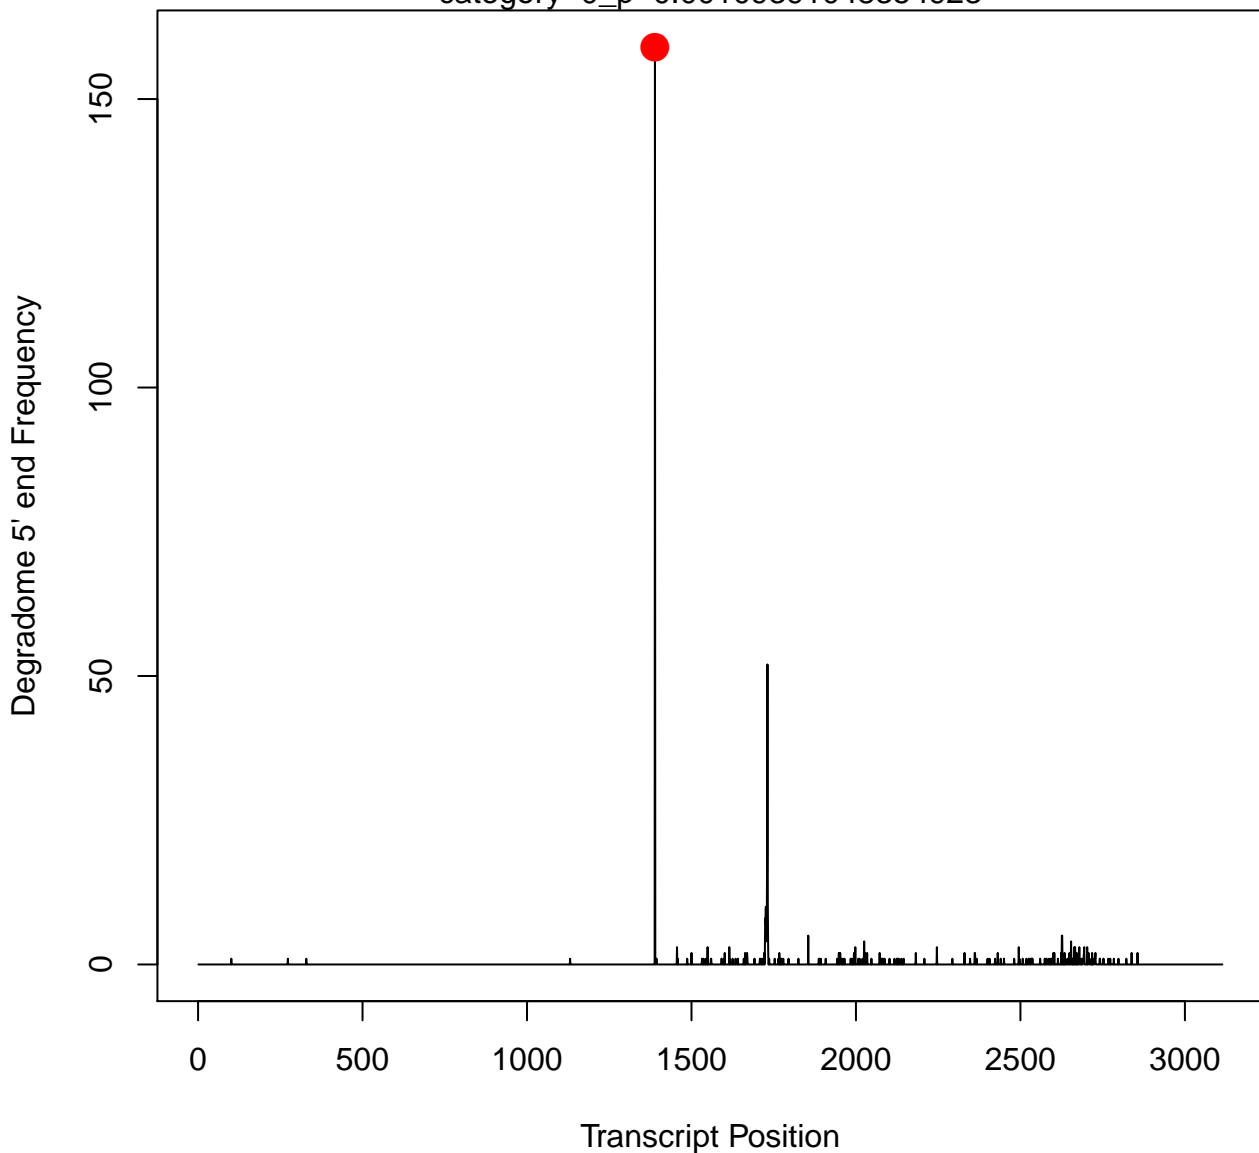

Supplement: s1 [file s1]

**T=Cluster-18410.93316\_Q=novel\_151\_S=340**

category=3\_p=0.093081058041071

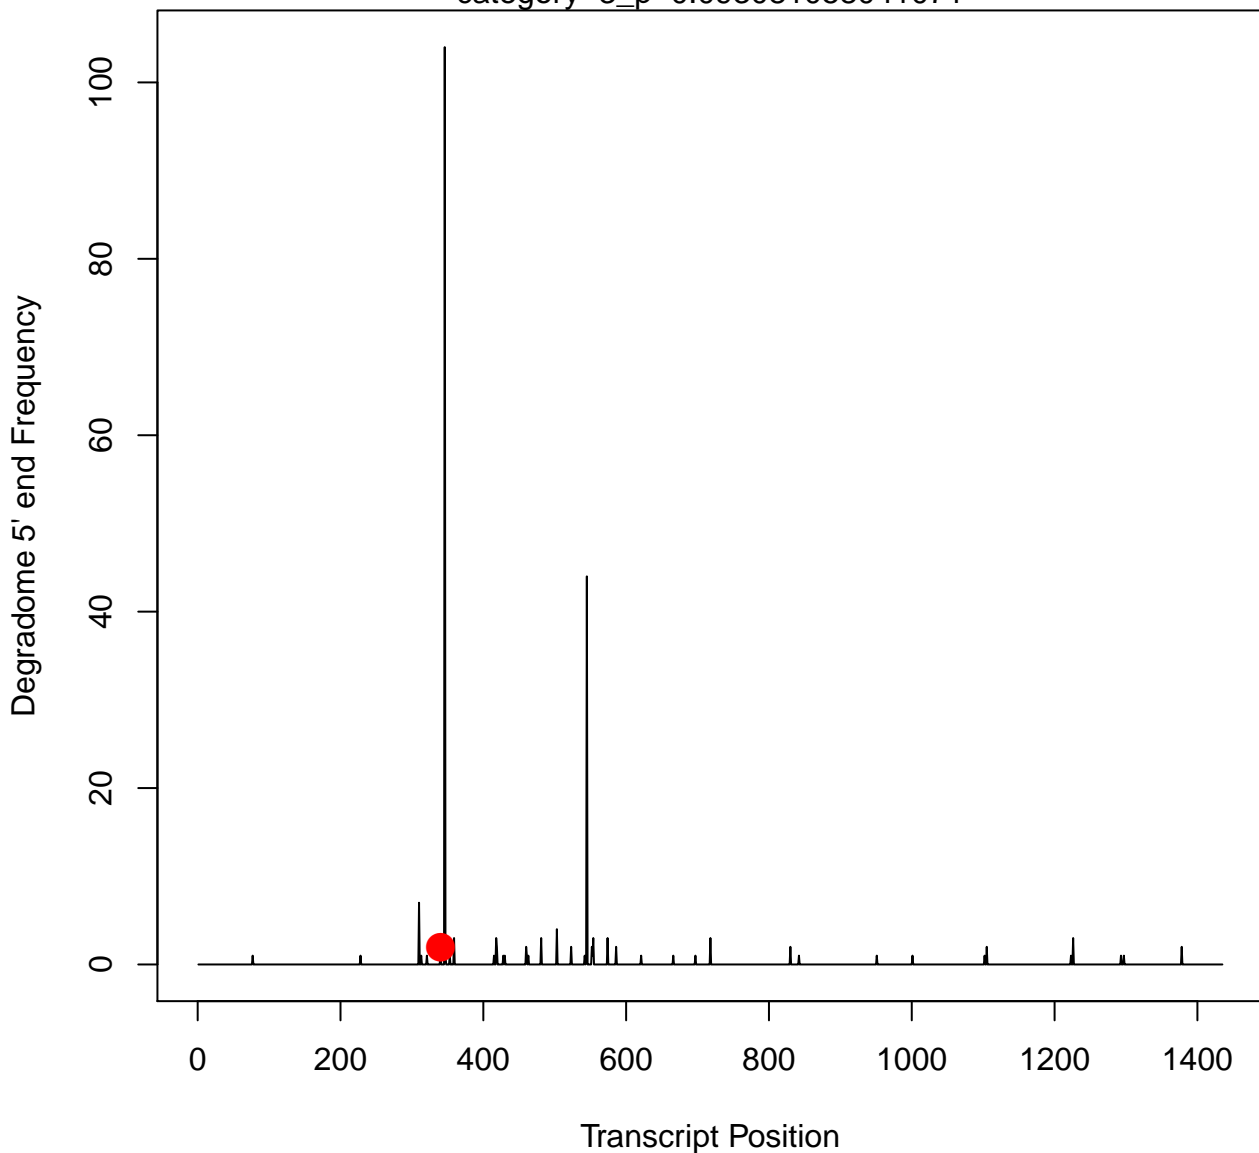

Supplement: s1 [file s1]

**T=Cluster-18410.28691\_Q=novel\_82\_S=496**

category=0\_p=0.0291193662351604

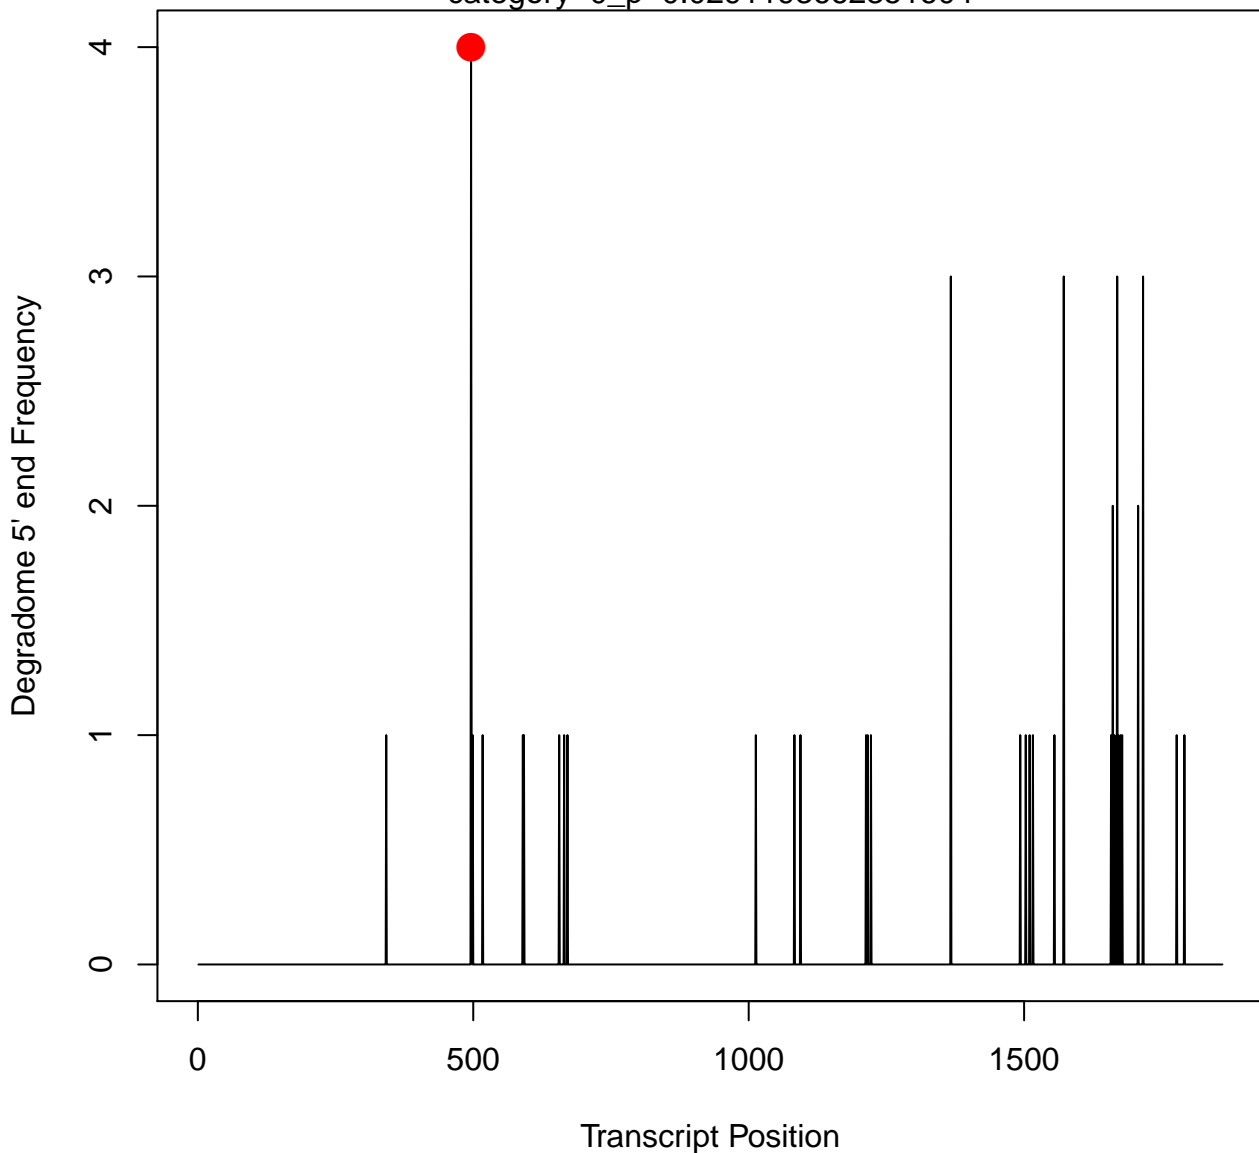

Supplement: s1 [file s1]

**T=Cluster-18410.85403\_Q=novel\_168\_S=570**

category=1\_p=0.0219054306230881

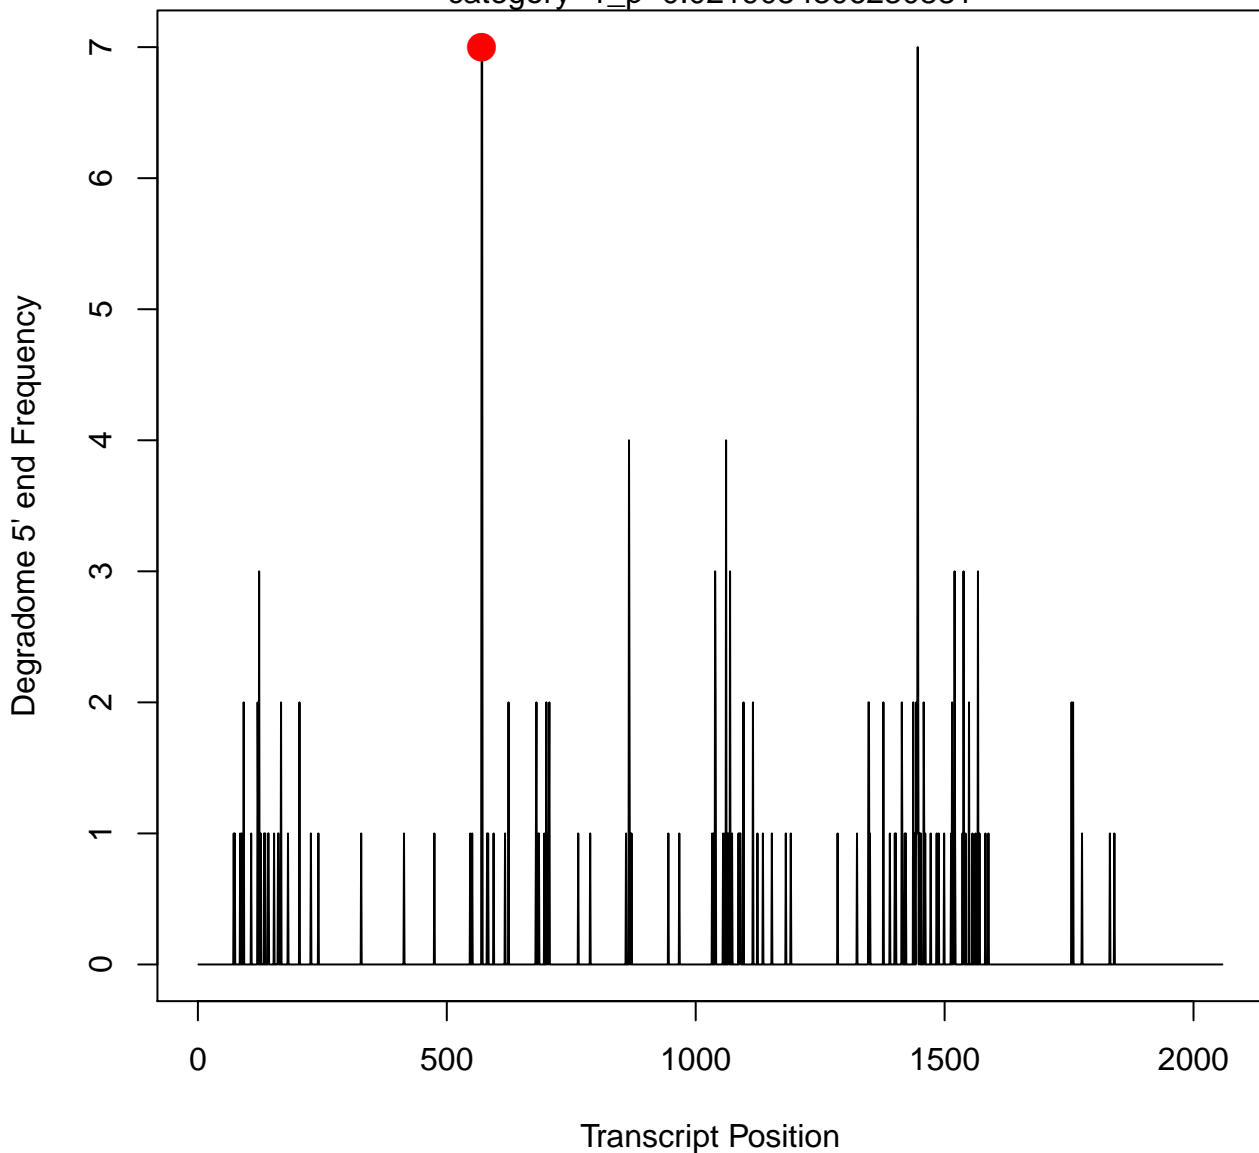

Supplement: s1 [file s1]

**T=Cluster-18410.81110\_Q=novel\_3\_S=547**

category=0\_p=0.0288536704297782

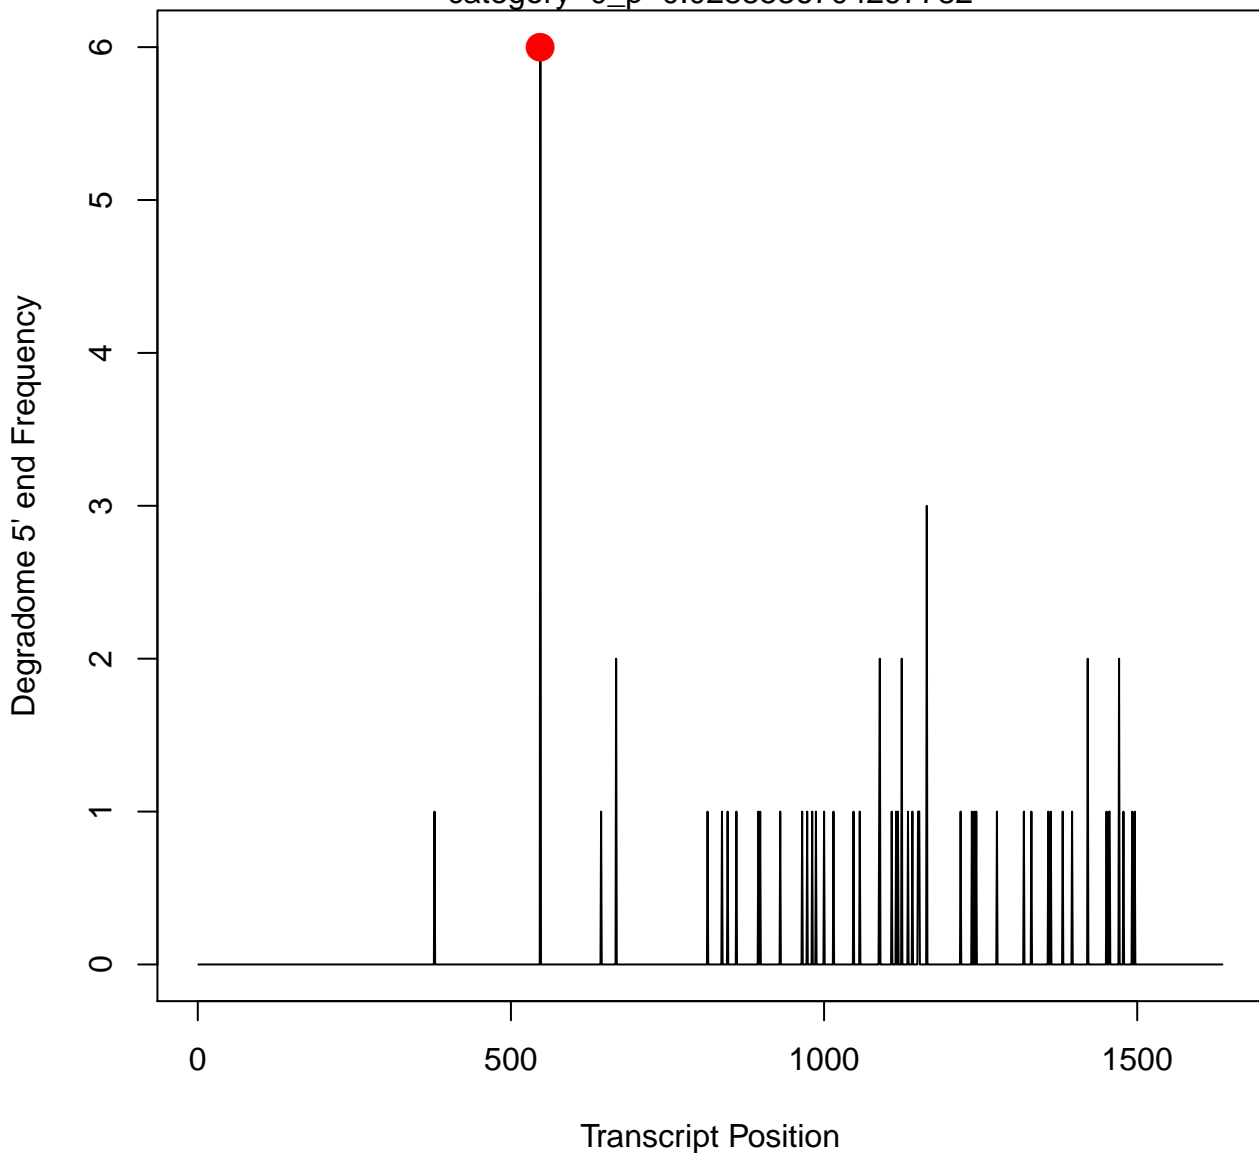

Supplement: s1 [file s1]

**T=Cluster-4562.1\_Q=pma-miR946a-3p\_S=426**

category=0\_p=0.00382345425486719

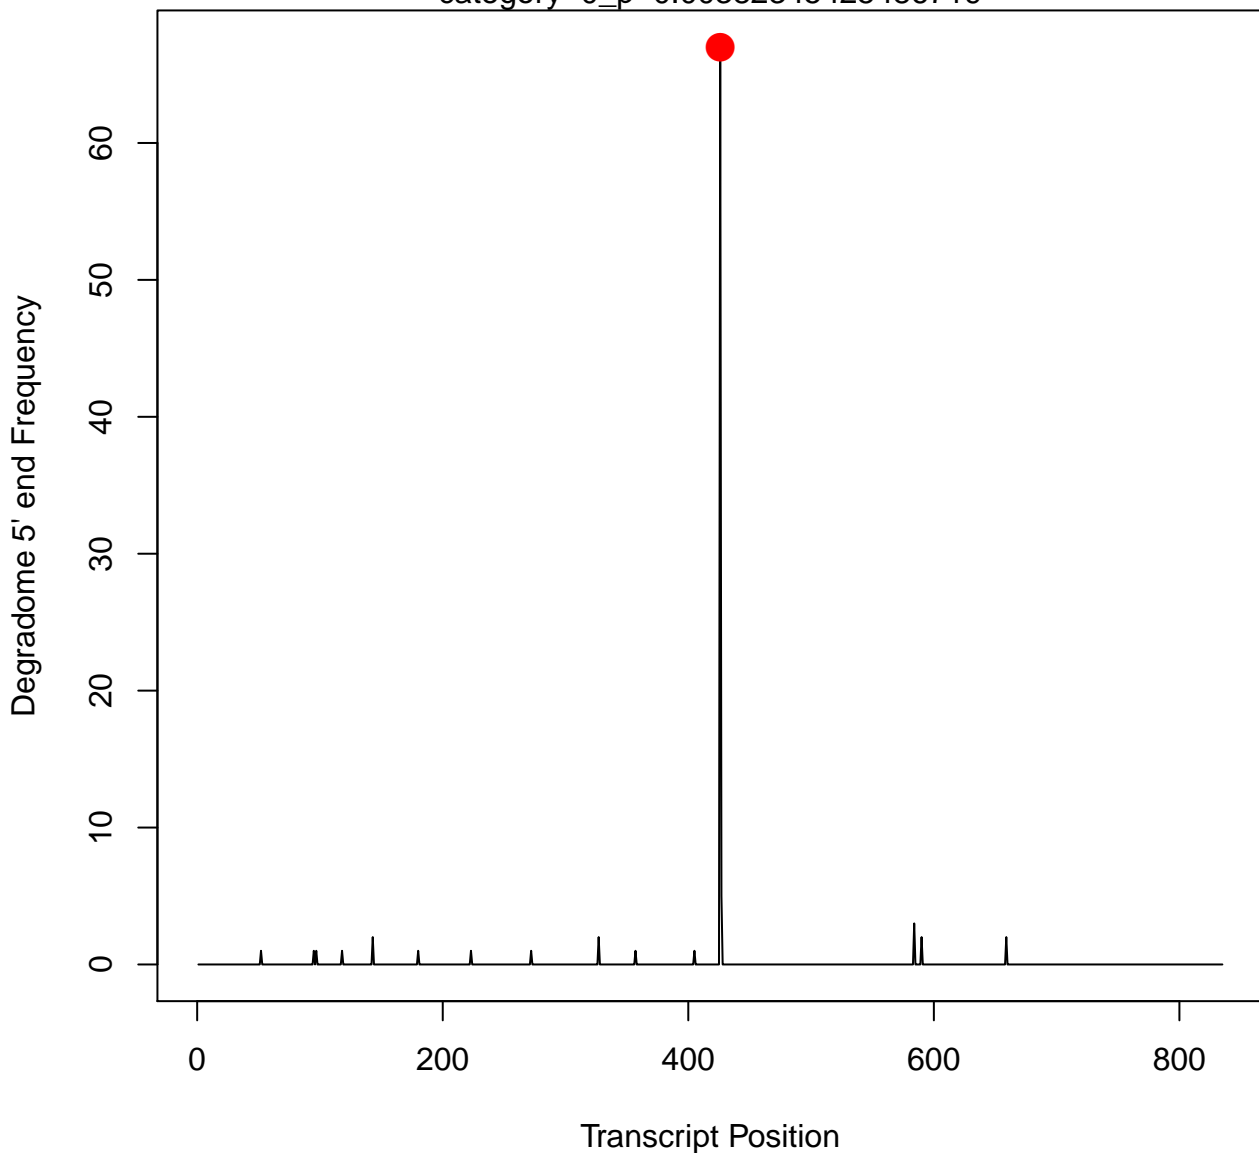

Supplement: s1 [file s1]

**T=Cluster-18410.68964\_Q=novel\_174\_S=394**

category=0\_p=0.00355083585007077

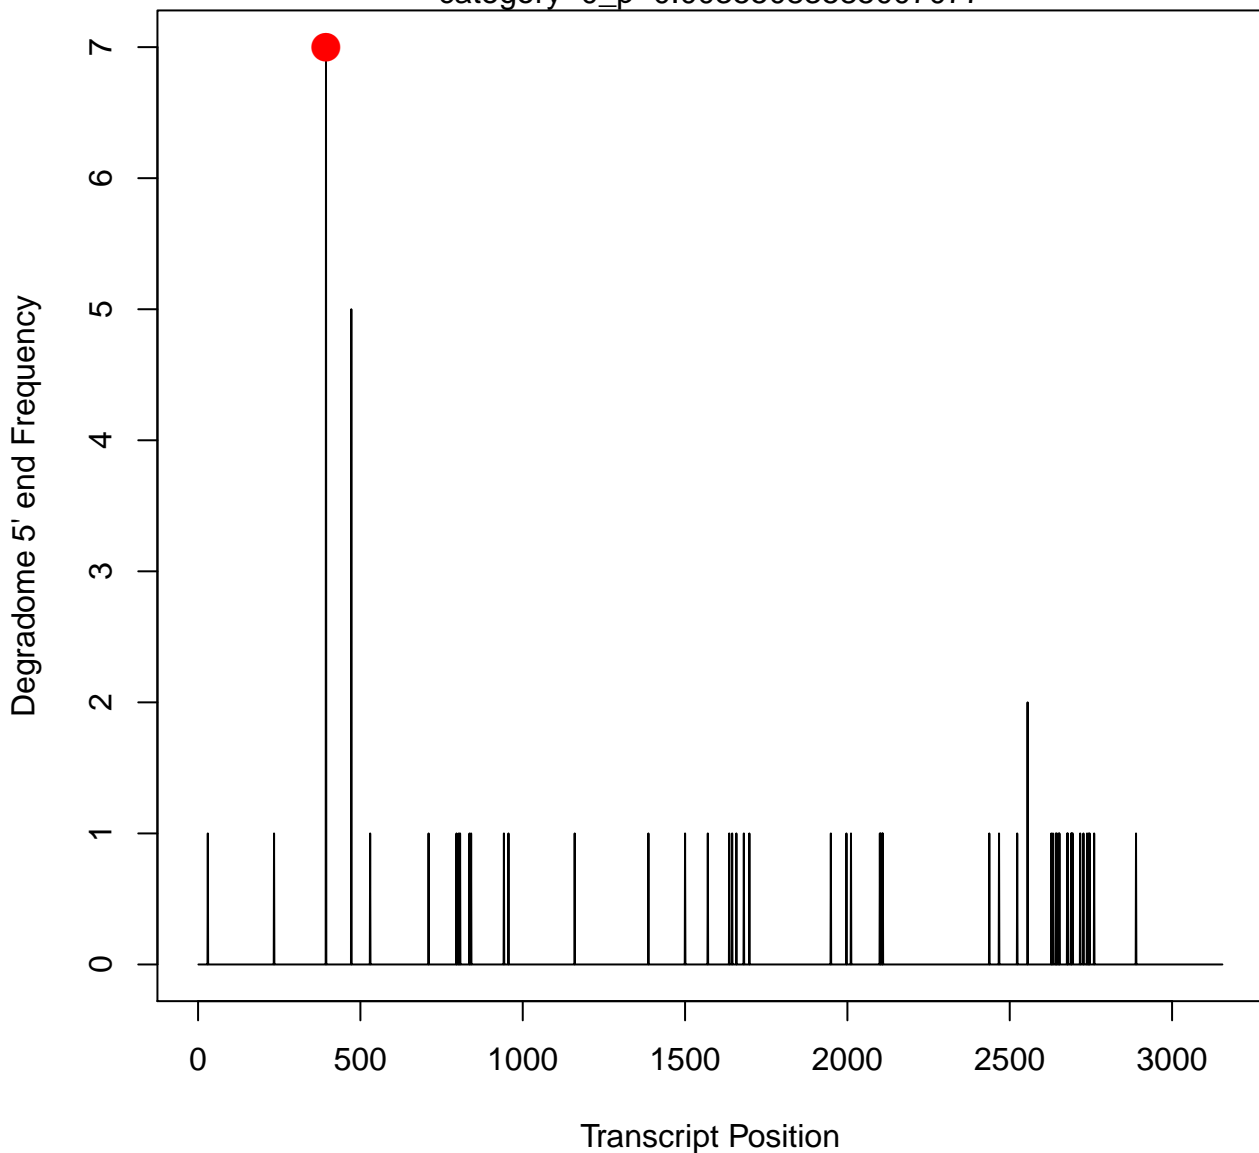

Supplement: s1 [file s1]

**T=Cluster-18410.73207\_Q=novel\_42\_S=1236**

category=0\_p=0.00327814283922701

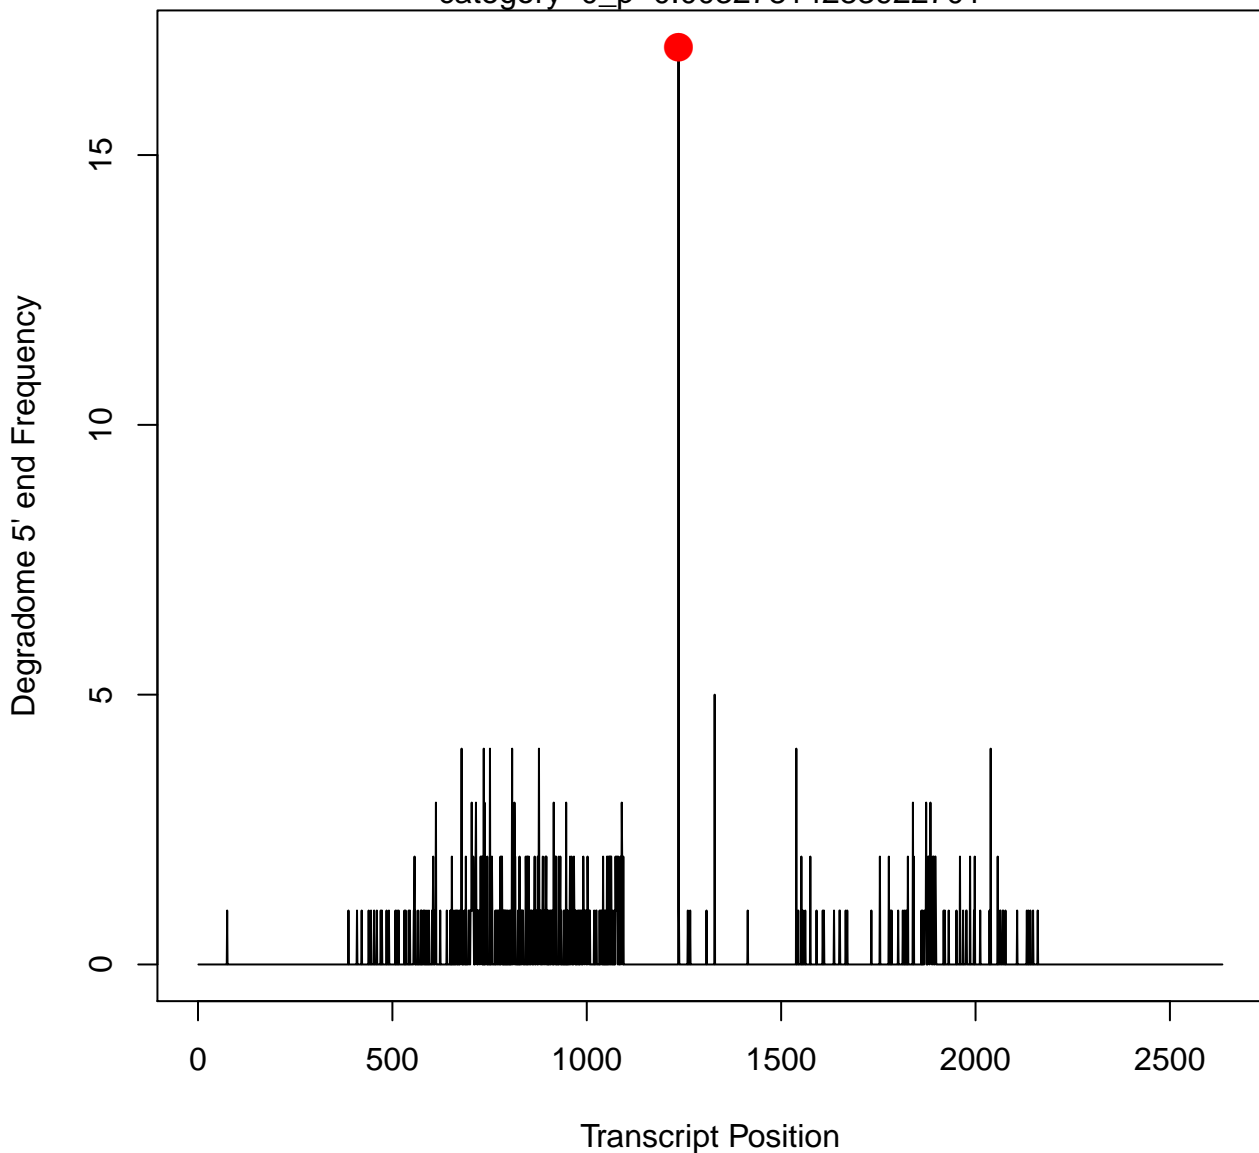

Supplement: s1 [file s1]

**T=Cluster-18410.66916\_Q=novel\_128\_S=2147**

category=2\_p=0.0992668787568005

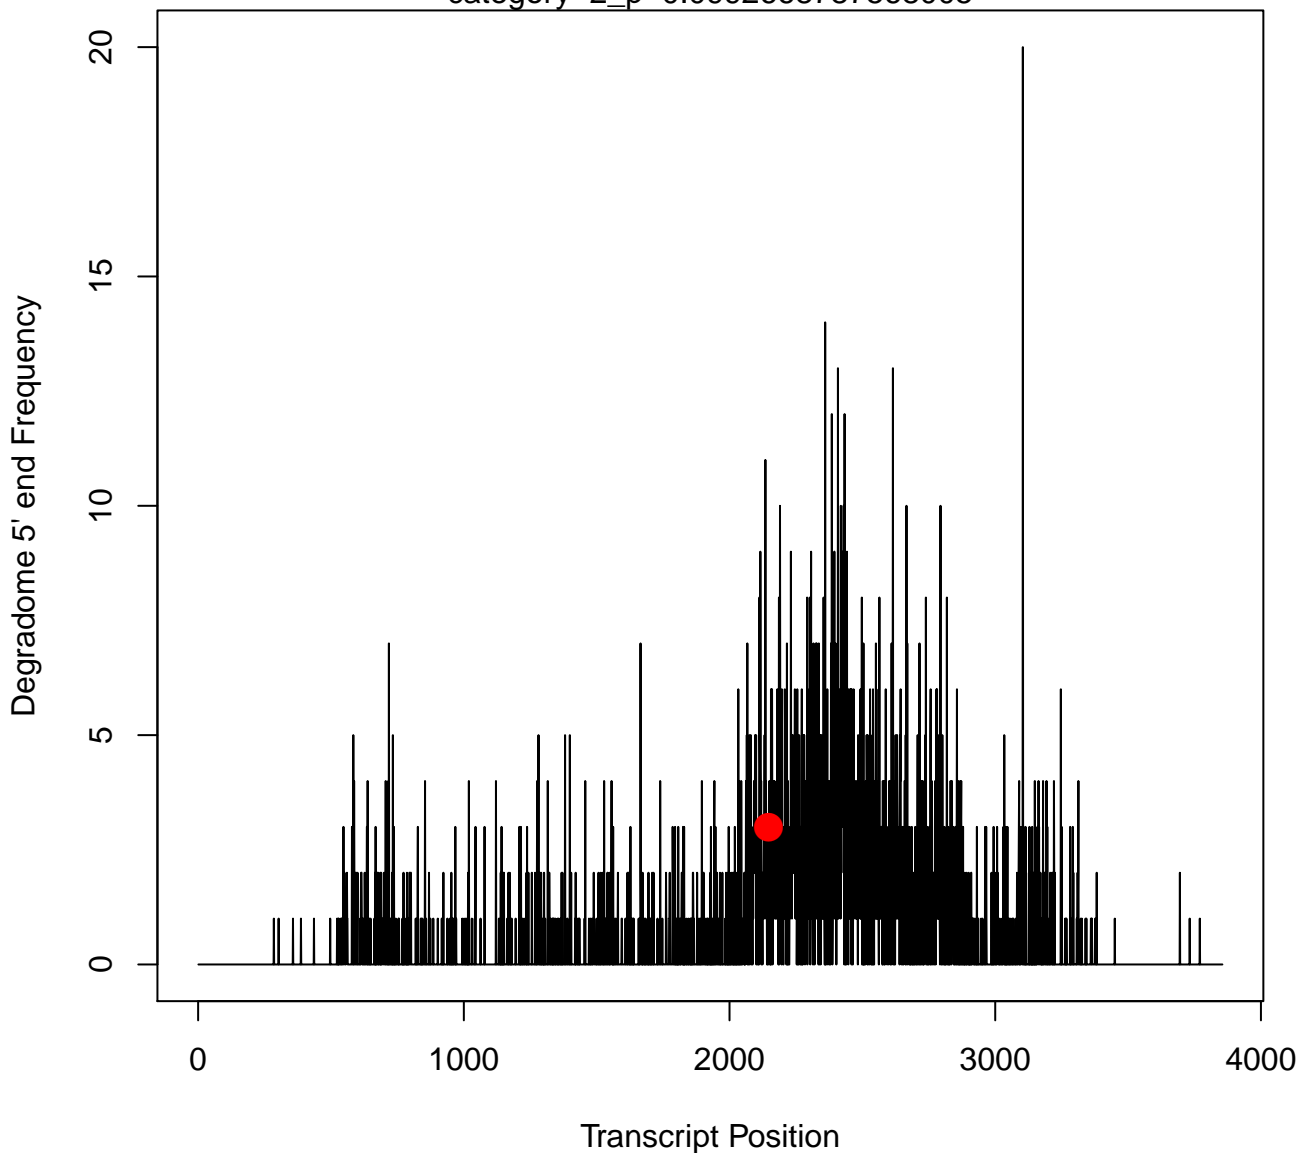

Supplement: s1 [file s1]

**T=Cluster-18410.37995\_Q=novel\_27\_S=224**

category=2\_p=0.0780956144108357

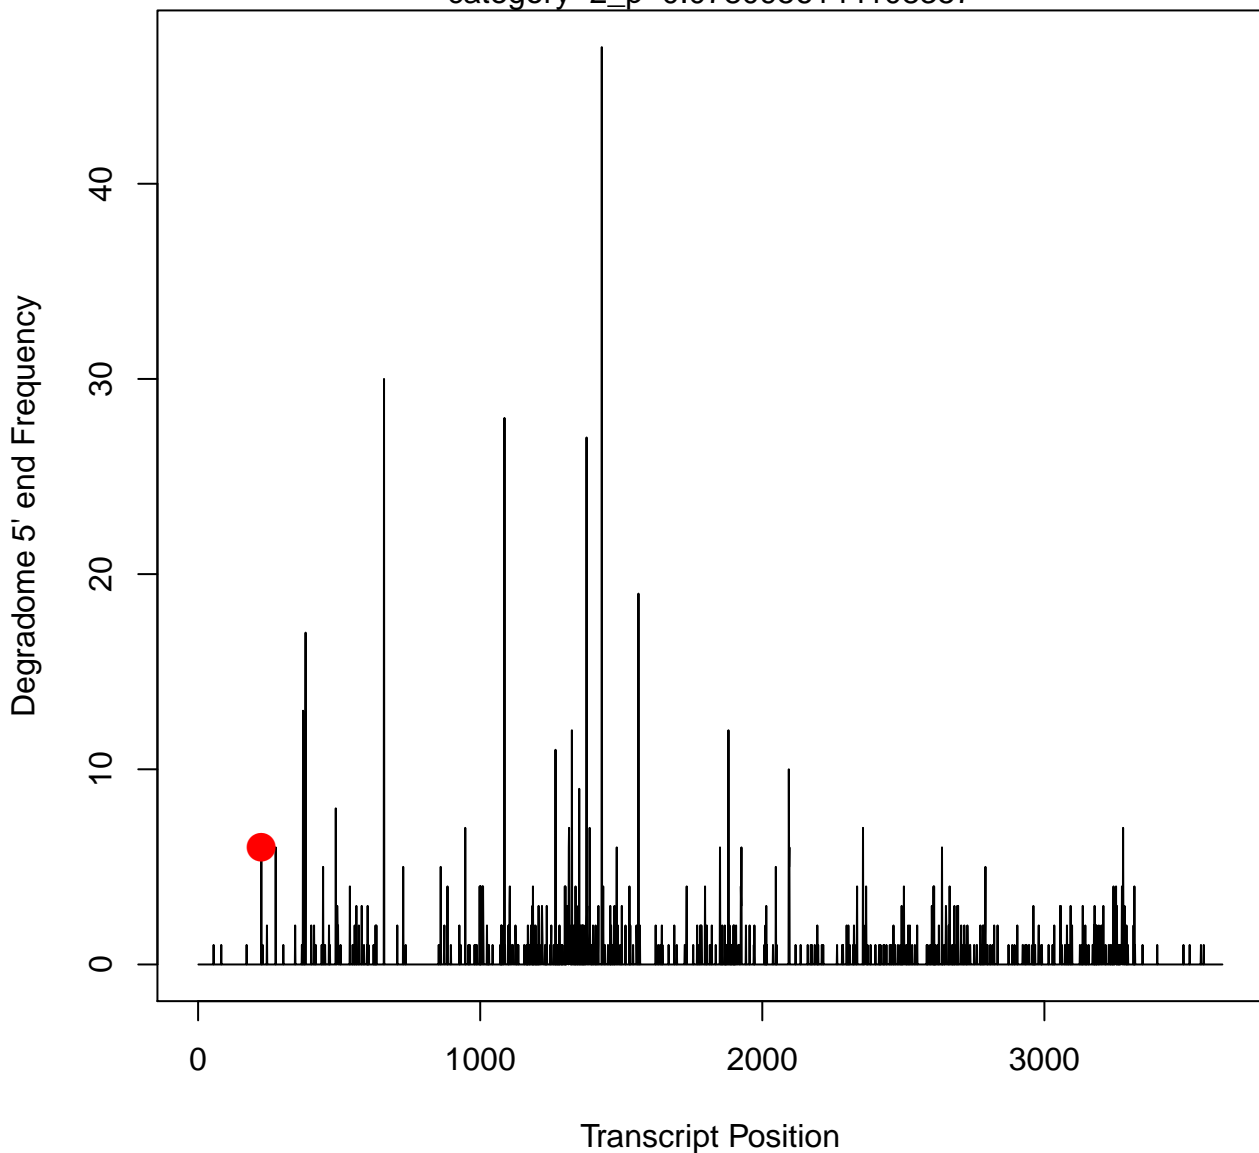

Supplement: s1 [file s1]

**T=Cluster-18410.81931\_Q=novel\_12\_S=241**

category=0\_p=0.0119674156270292

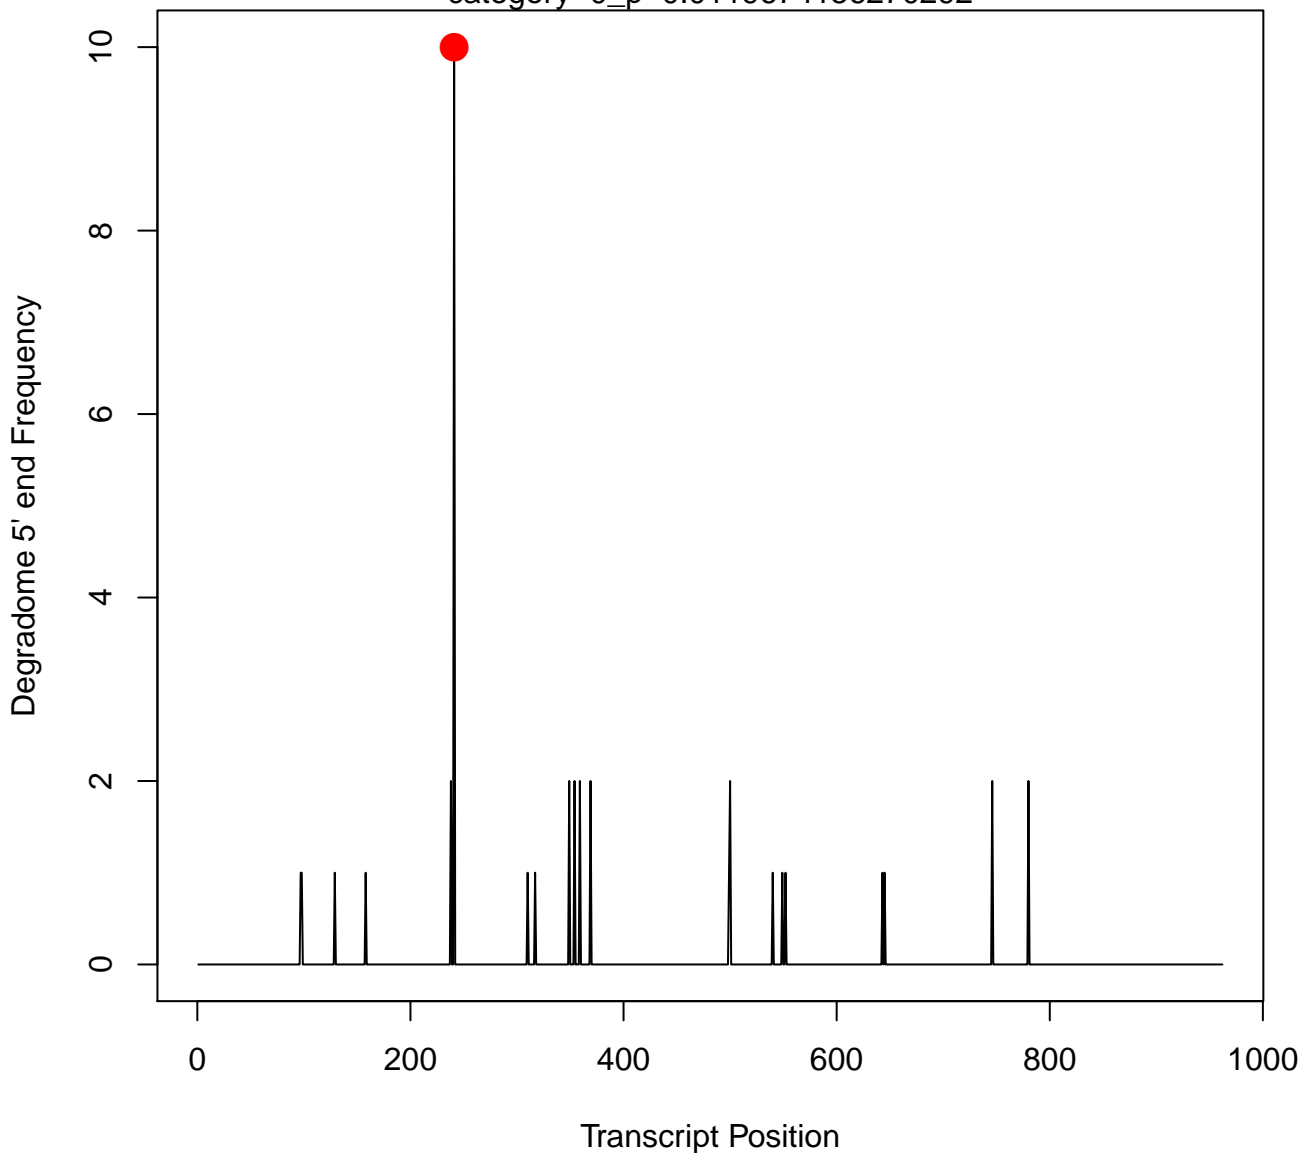

Supplement: s1 [file s1]

**T=Cluster-18410.68090\_Q=novel\_20\_S=1852**

category=0\_p=0.0073607136464986

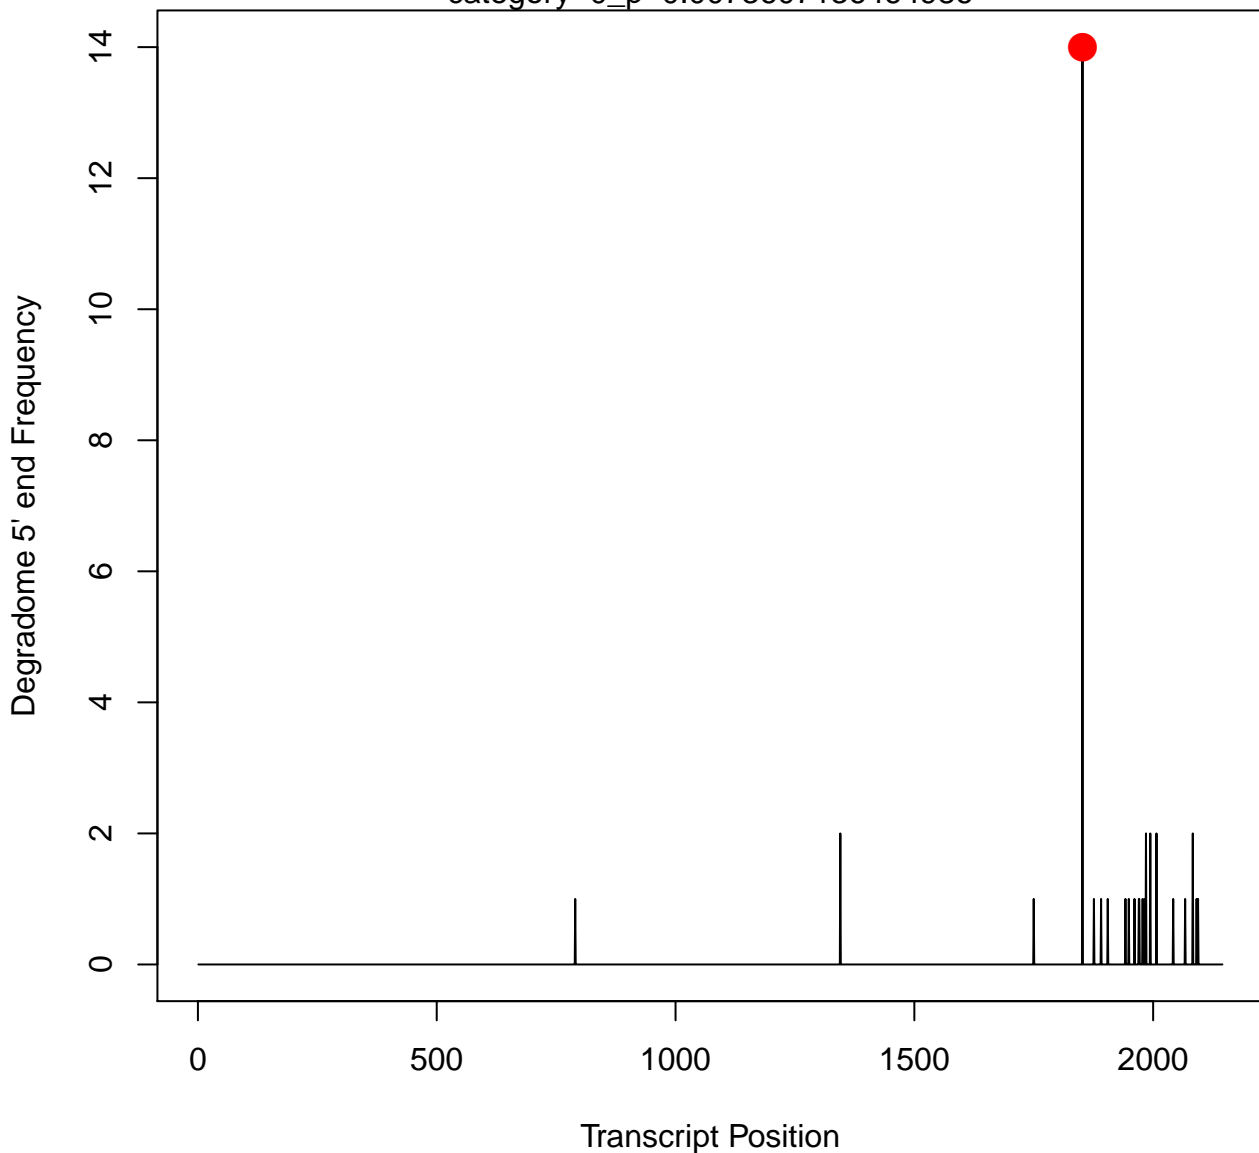

Supplement: s1 [file s1]

**T=Cluster-15921.1\_Q=novel\_148\_S=305**

category=0\_p=0.00382345425486719

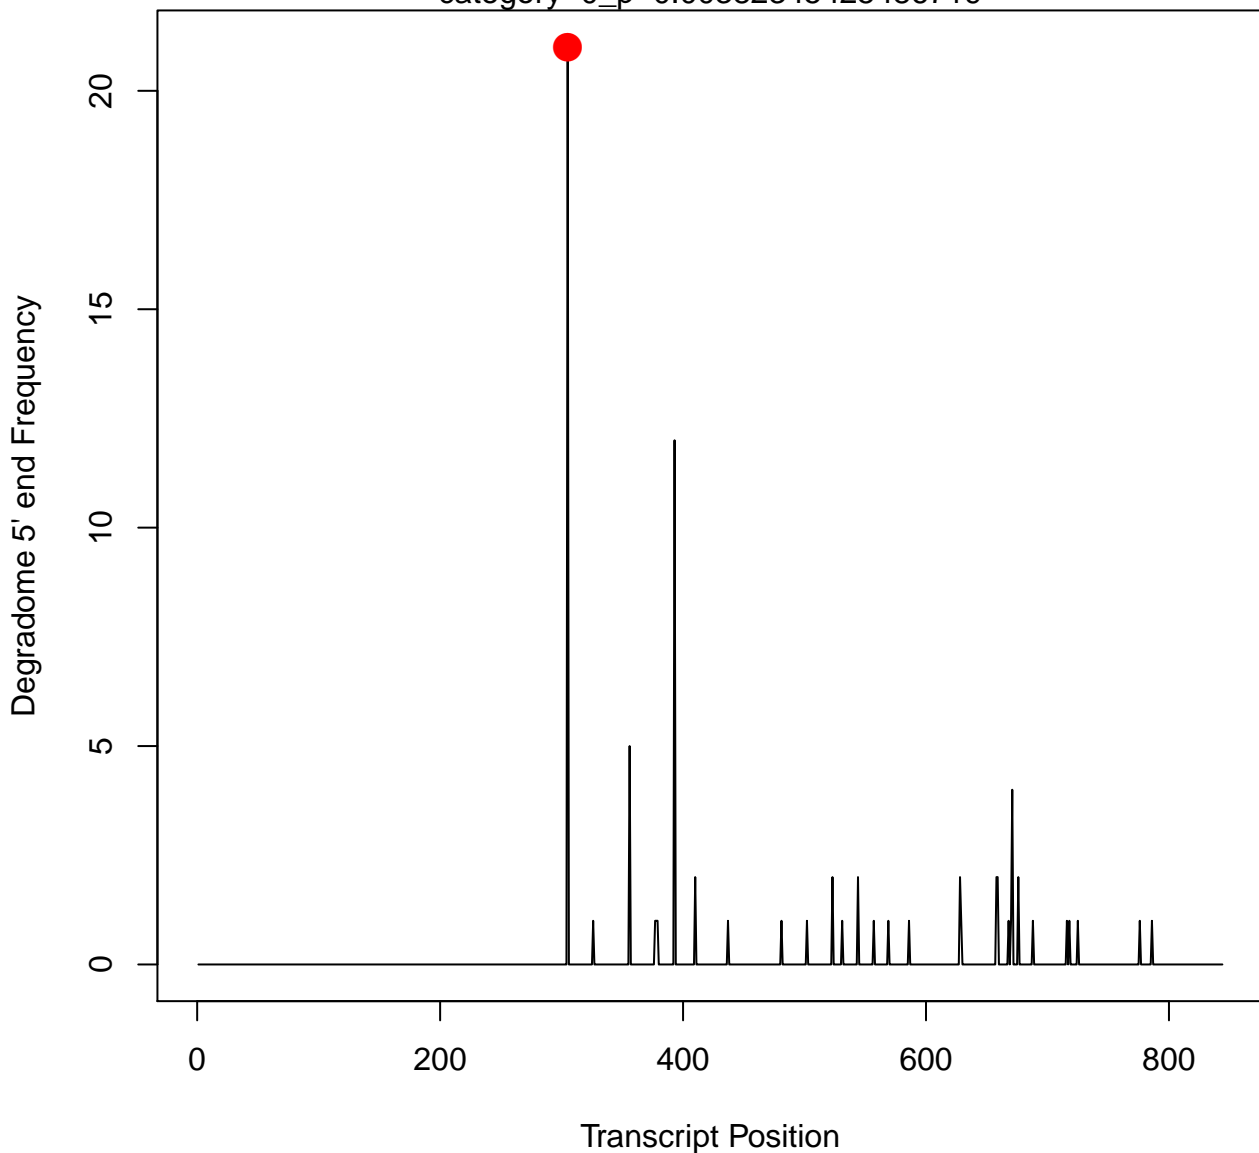

Supplement: s1 [file s1]

**T=Cluster-21042.1\_Q=novel\_114\_S=506**

category=2\_p=0.0673240995462872

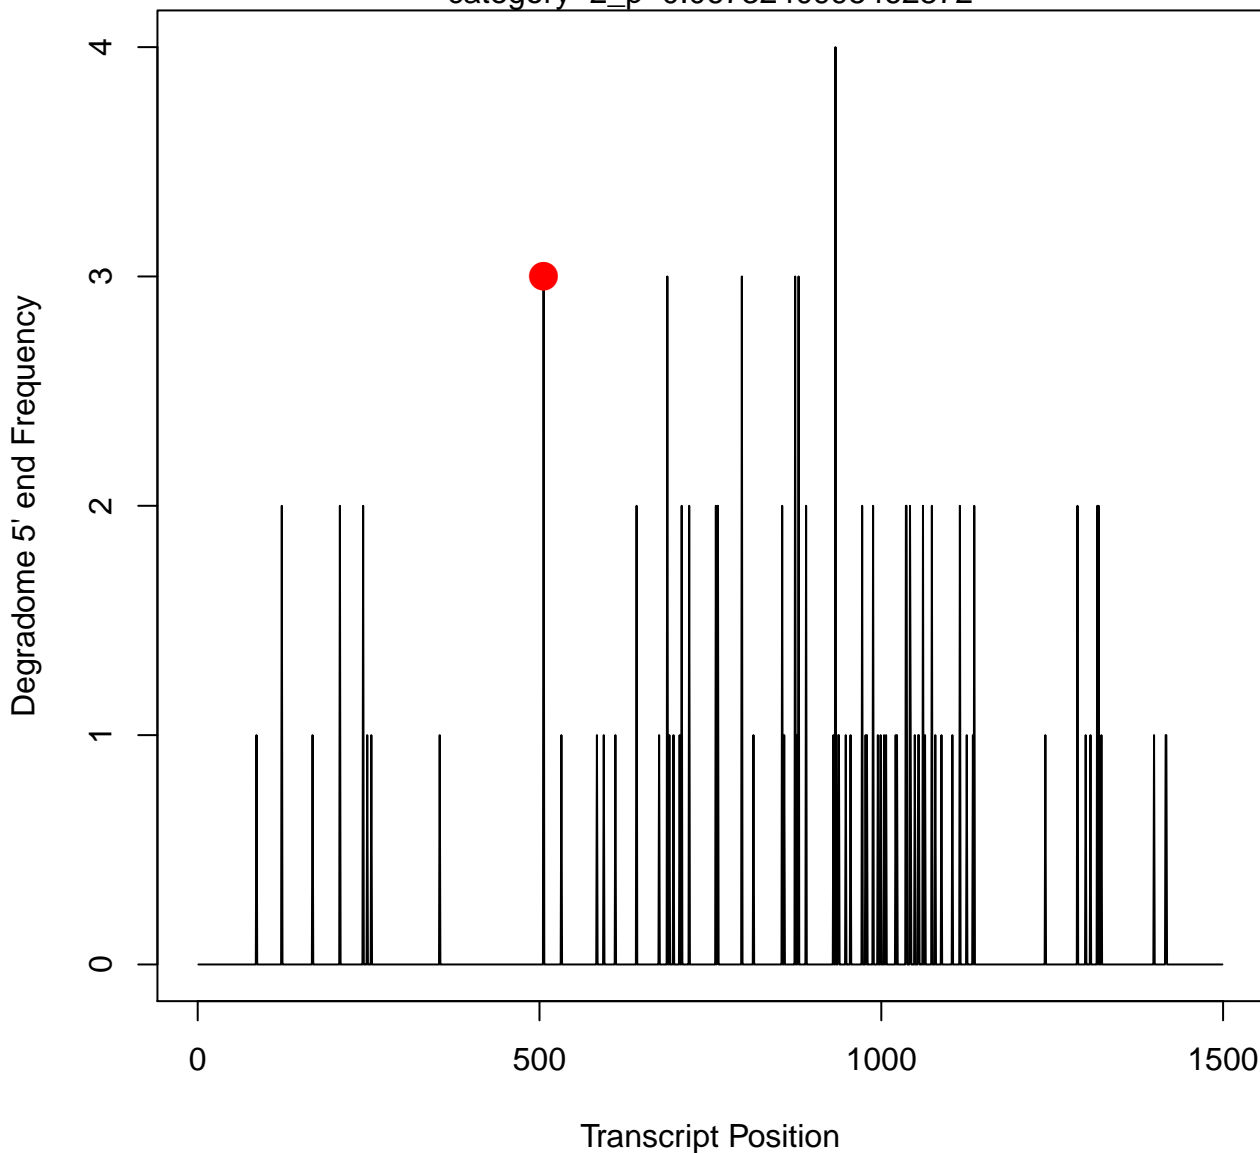

Supplement: s1 [file s1]
