# Supplementary figures and images for: Uncovering miRNA-mRNA Regulatory Modules in Developing Xylem of Pinus massoniana via Small RNA and Degradome Sequencing (part 4 of 9)
Source: MDPI journal article supplement (doi:10.3390/ijms221810154), 2021-09-21

**T=Cluster-18410.52962\_Q=novel\_128\_S=2304**

category=3\_p=0.0054131956921798

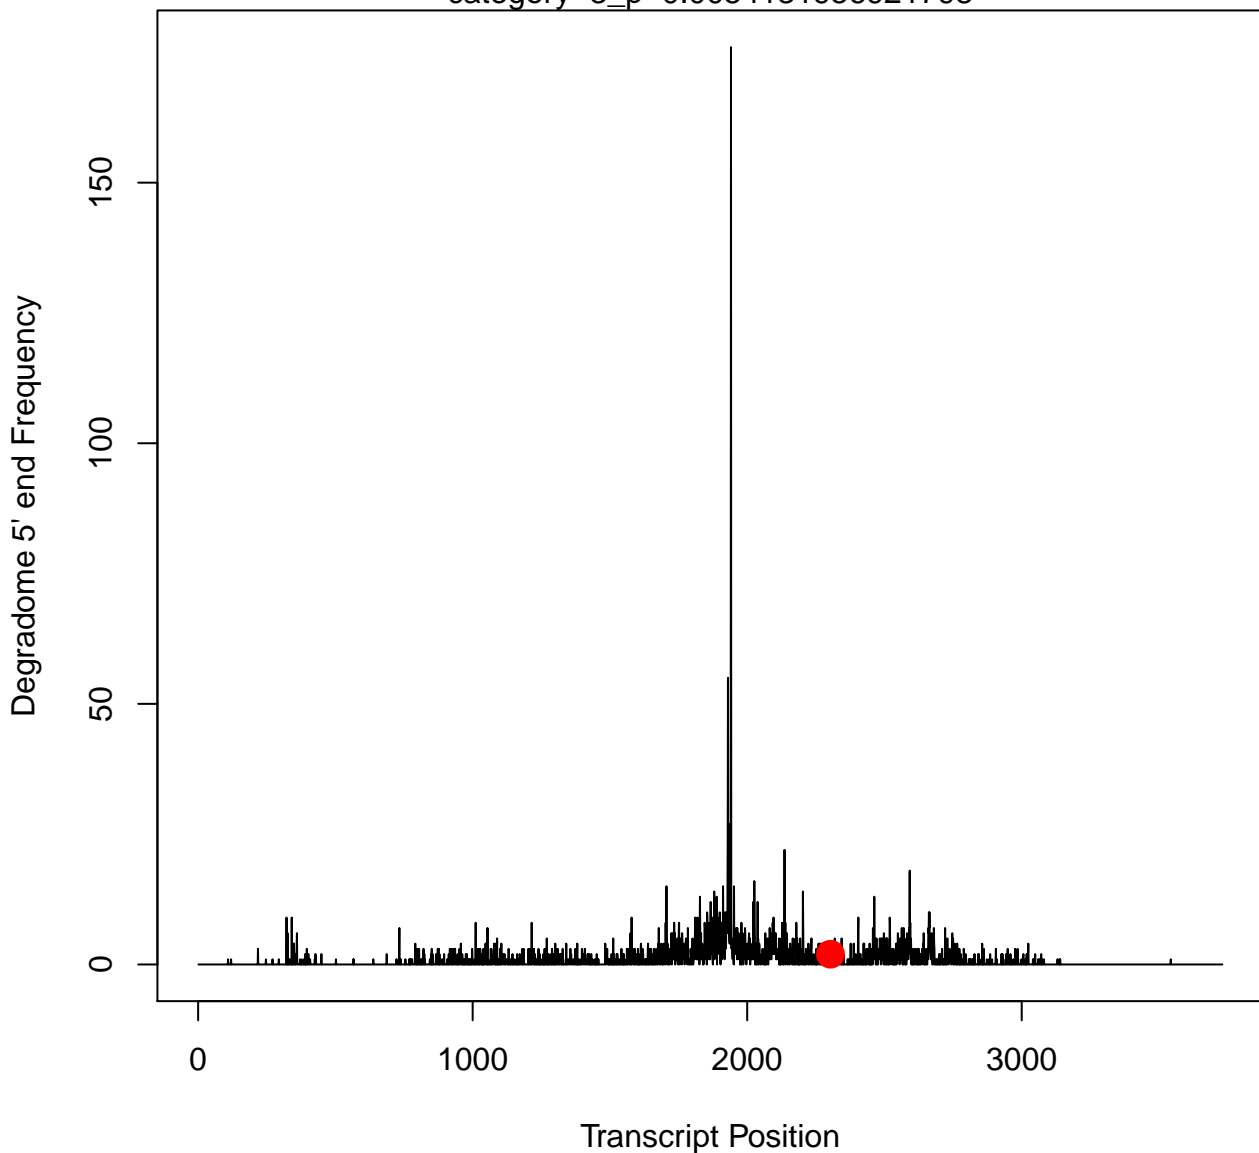

Supplement: s1 [file s1]

**T=Cluster-18410.104449\_Q=novel\_156\_S=1683**

category=1\_p=0.0145549959653336

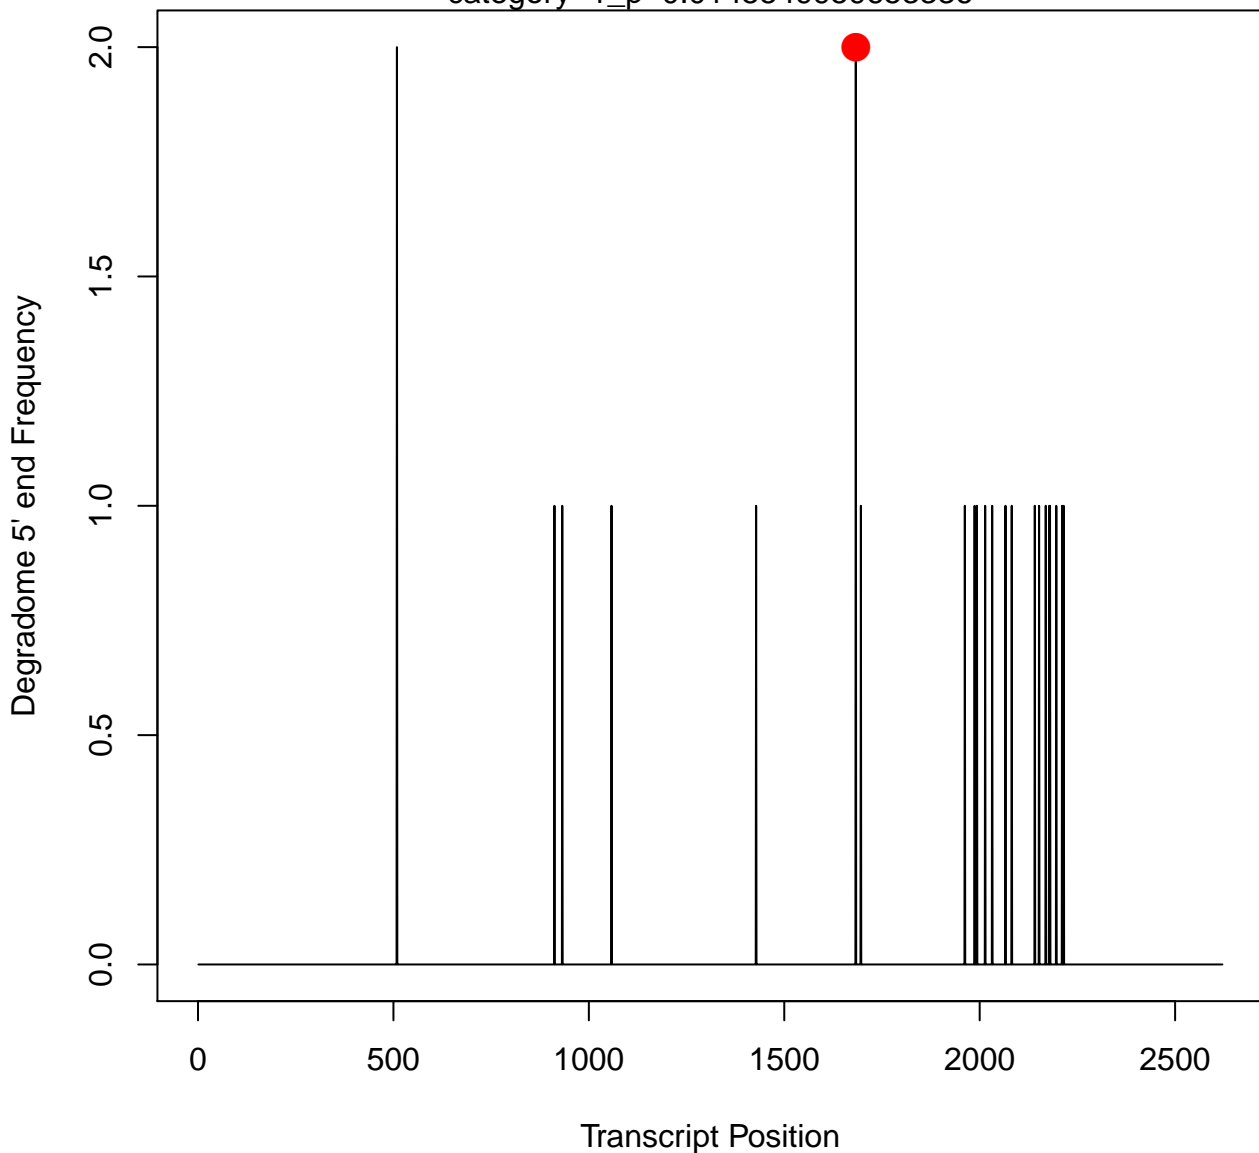

Supplement: s1 [file s1]

**T=Cluster-18410.14056\_Q=novel\_46\_S=1440**

category=0\_p=0.0955436398534319

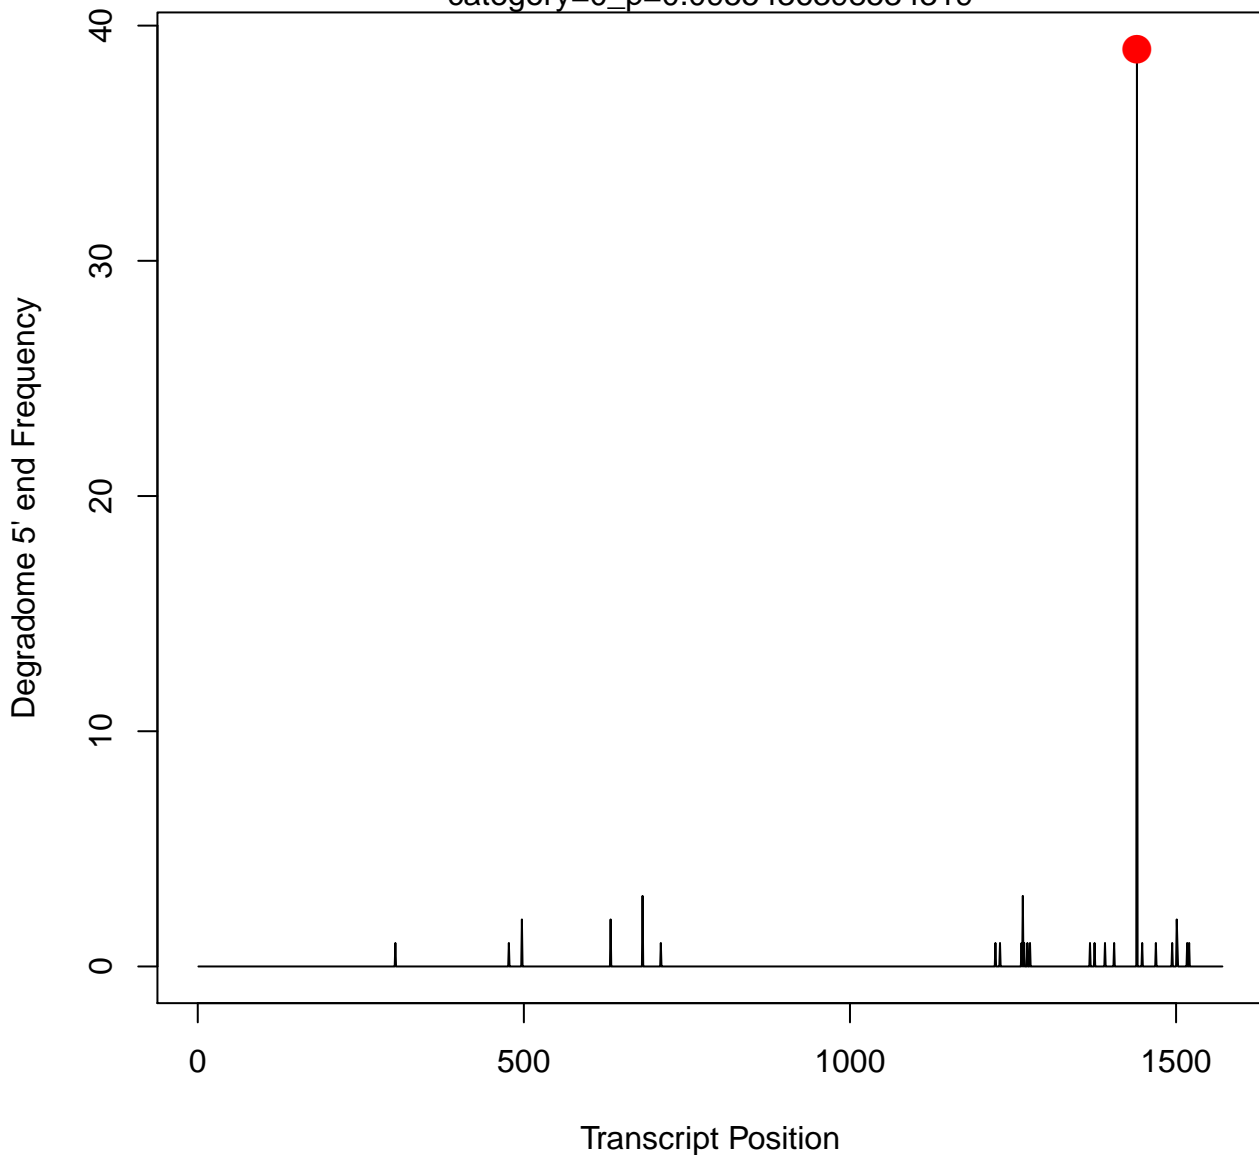

Supplement: s1 [file s1]

**T=Cluster-18410.71813\_Q=novel\_59\_S=1292**

category=0\_p=0.0328314839252967

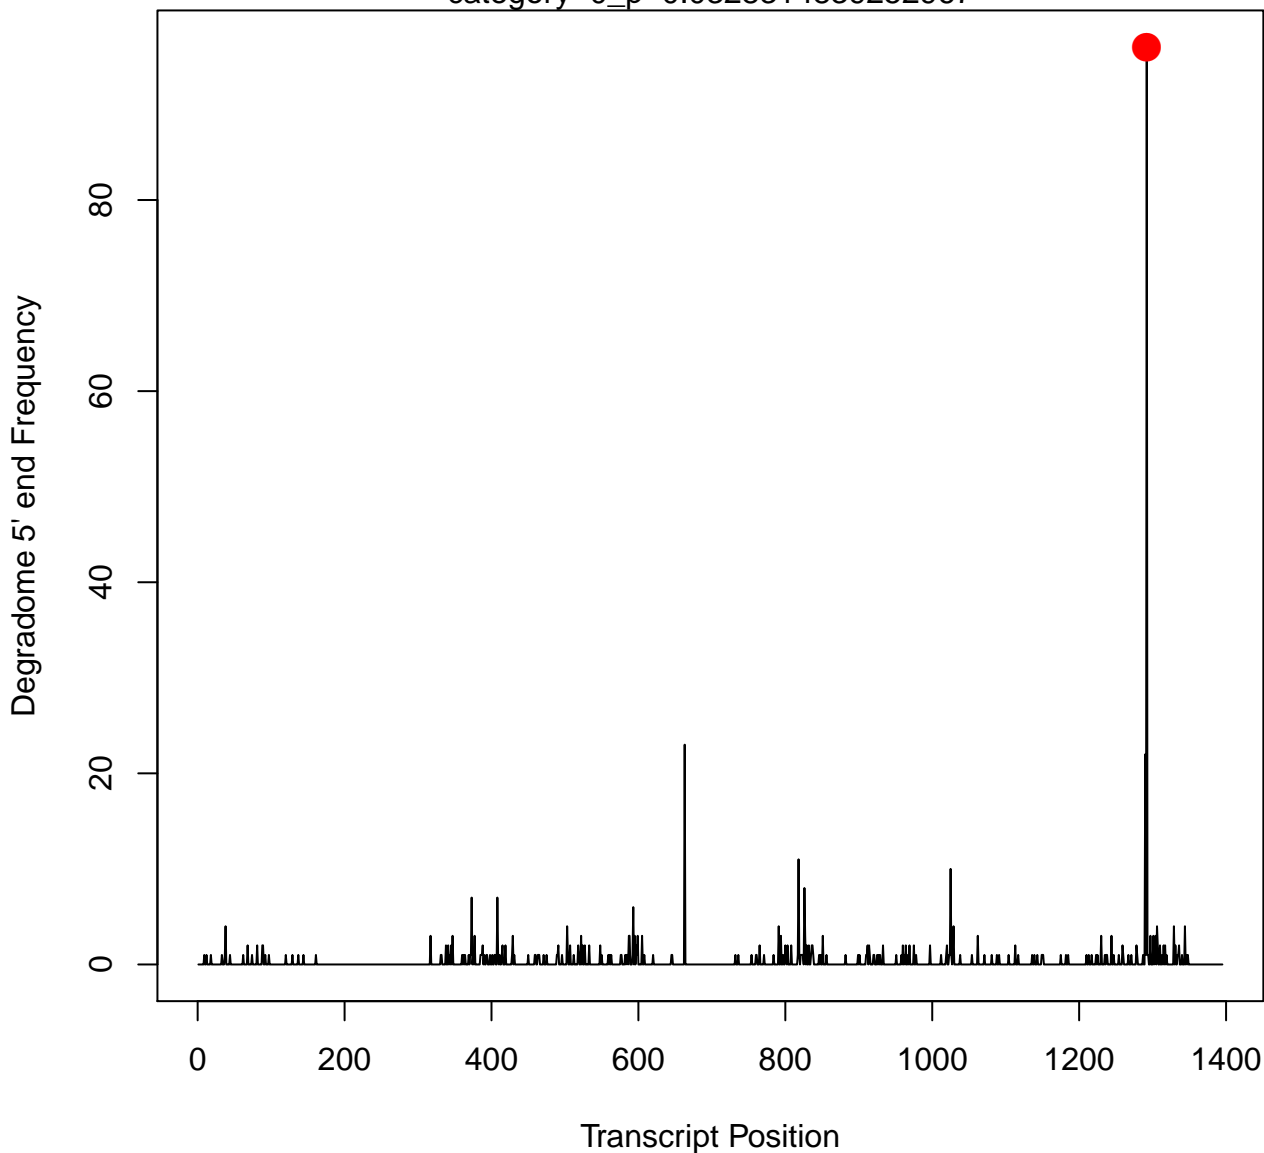

Supplement: s1 [file s1]

**T=Cluster-18410.94084\_Q=novel\_59\_S=45**

category=0\_p=0.0125079730989179

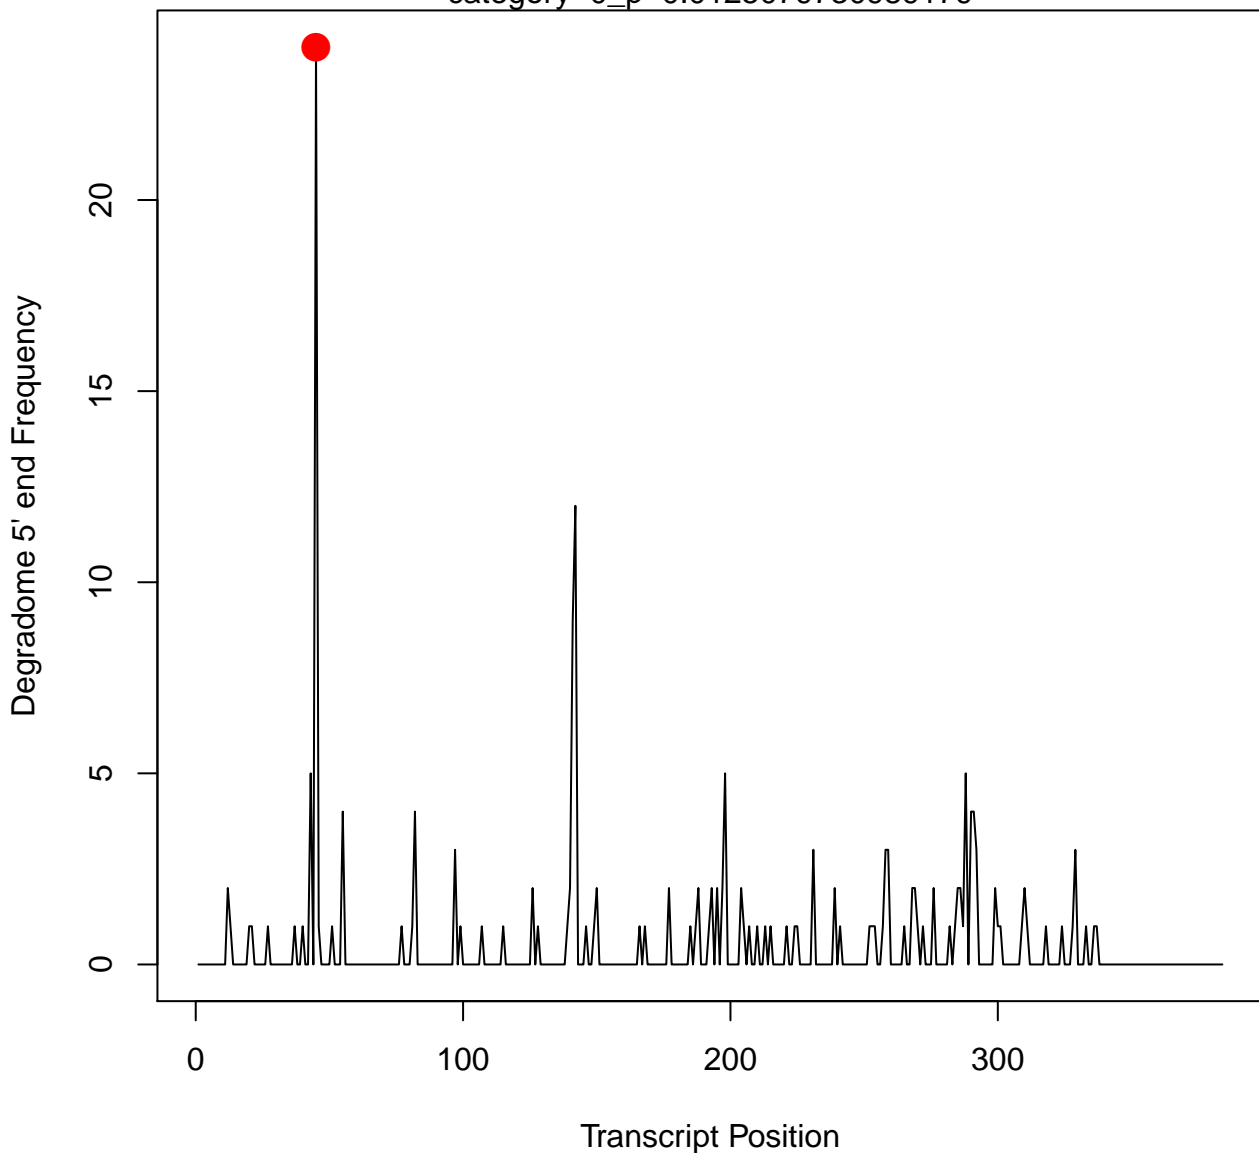

Supplement: s1 [file s1]

**T=Cluster-18410.105130\_Q=novel\_14\_S=86**

category=0\_p=0.00218662432695249

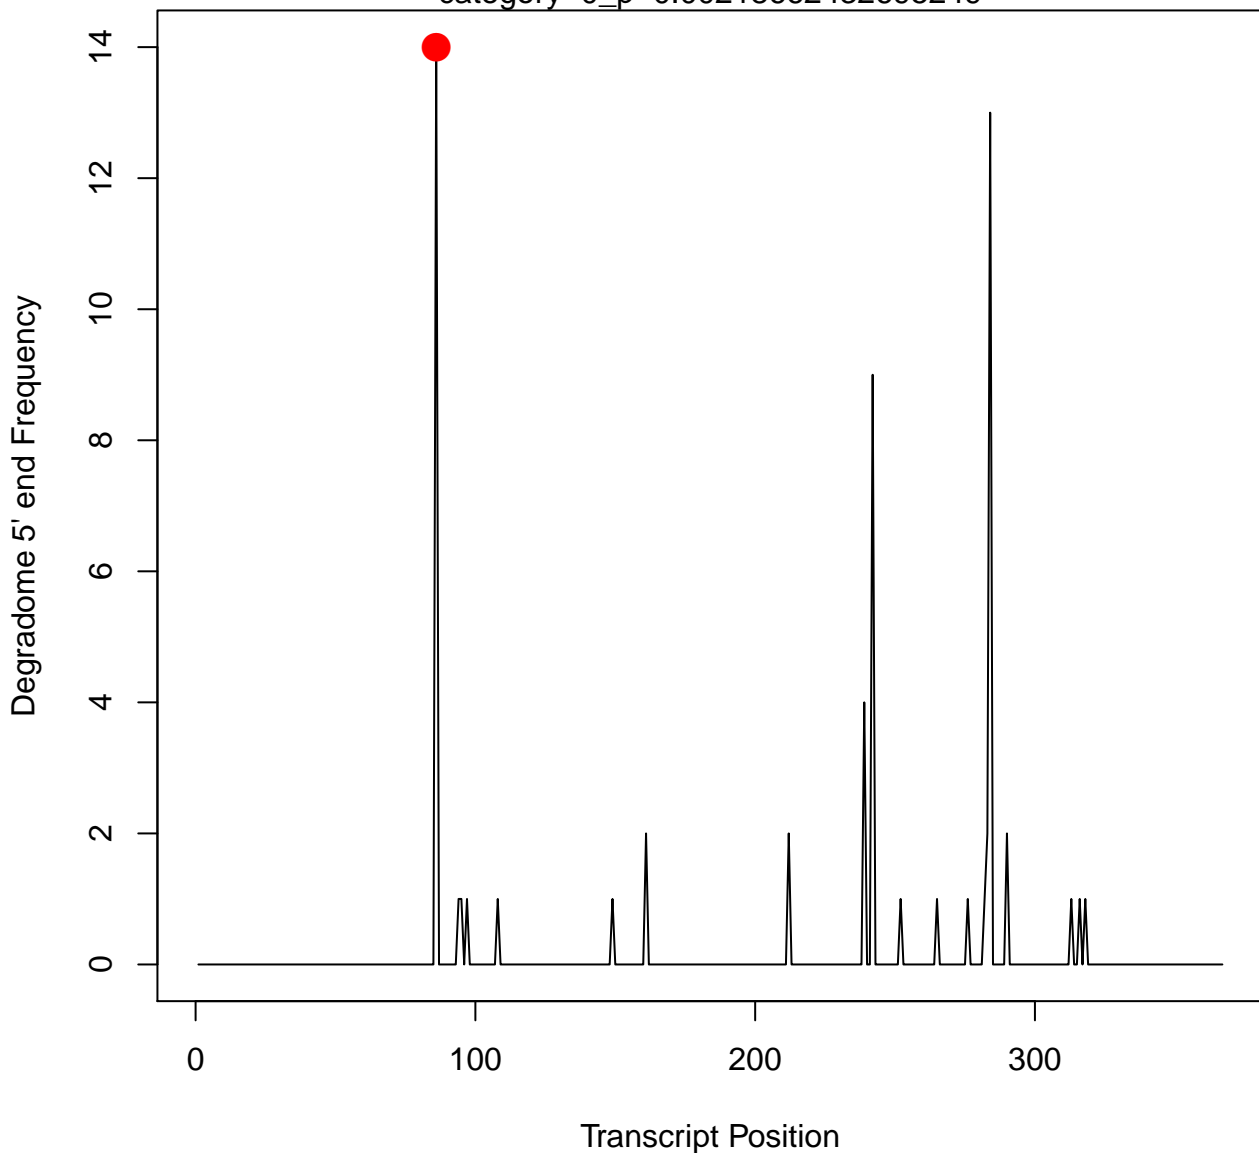

Supplement: s1 [file s1]

**T=Cluster-18410.65911\_Q=novel\_195\_S=1746**

category=1\_p=0.015169636303493

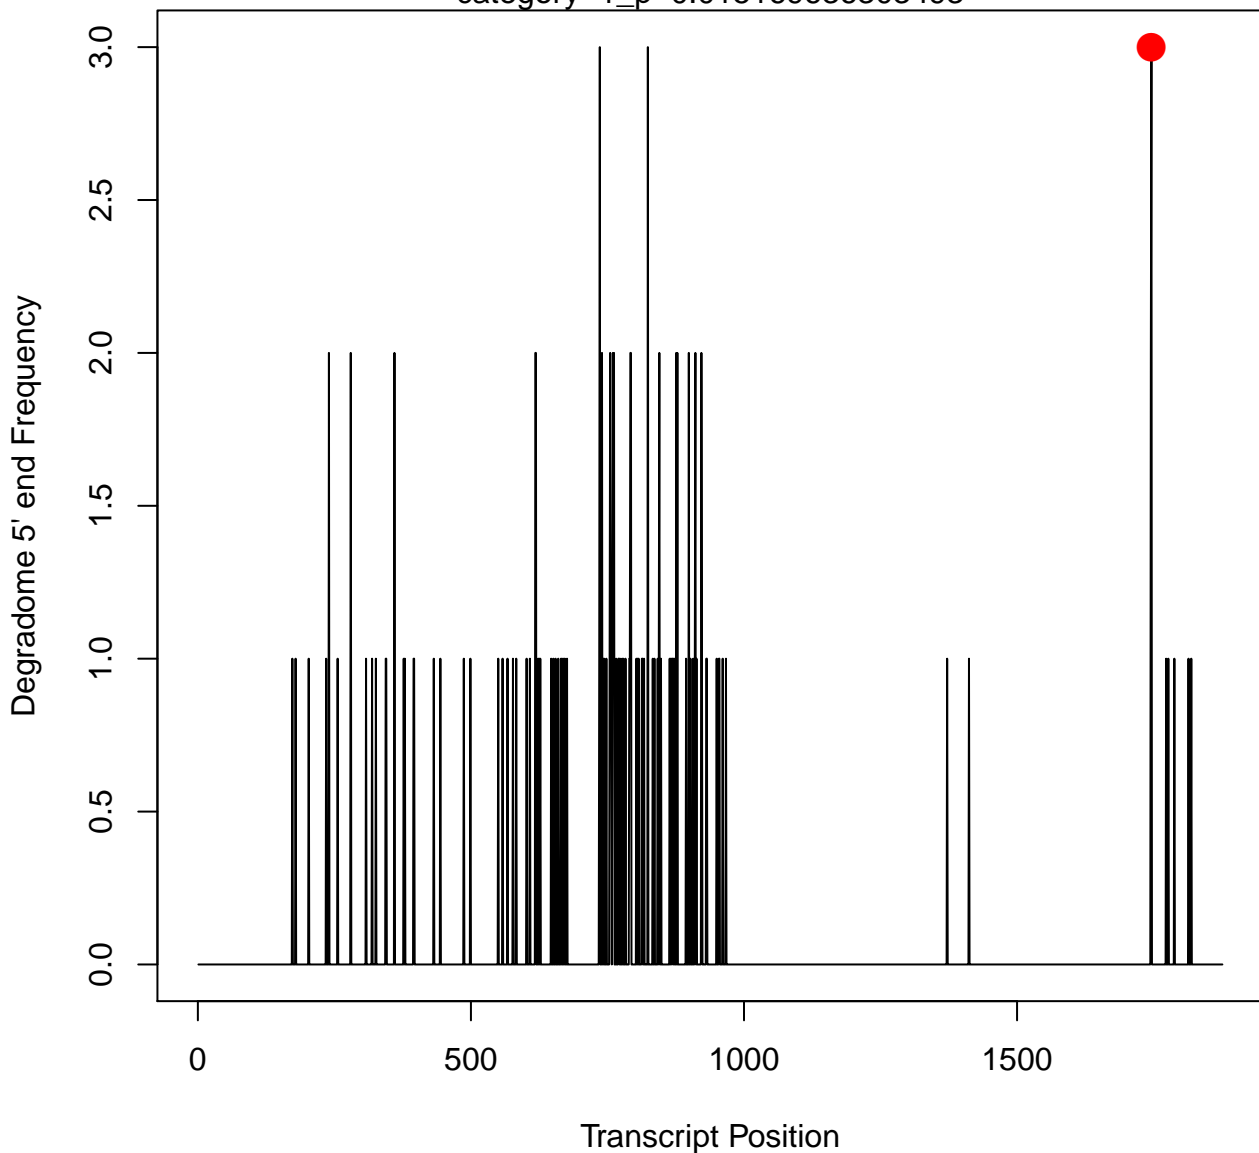

Supplement: s1 [file s1]

**T=Cluster-18410.22713\_Q=novel\_80\_S=136**

category=0\_p=0.0235244583934175

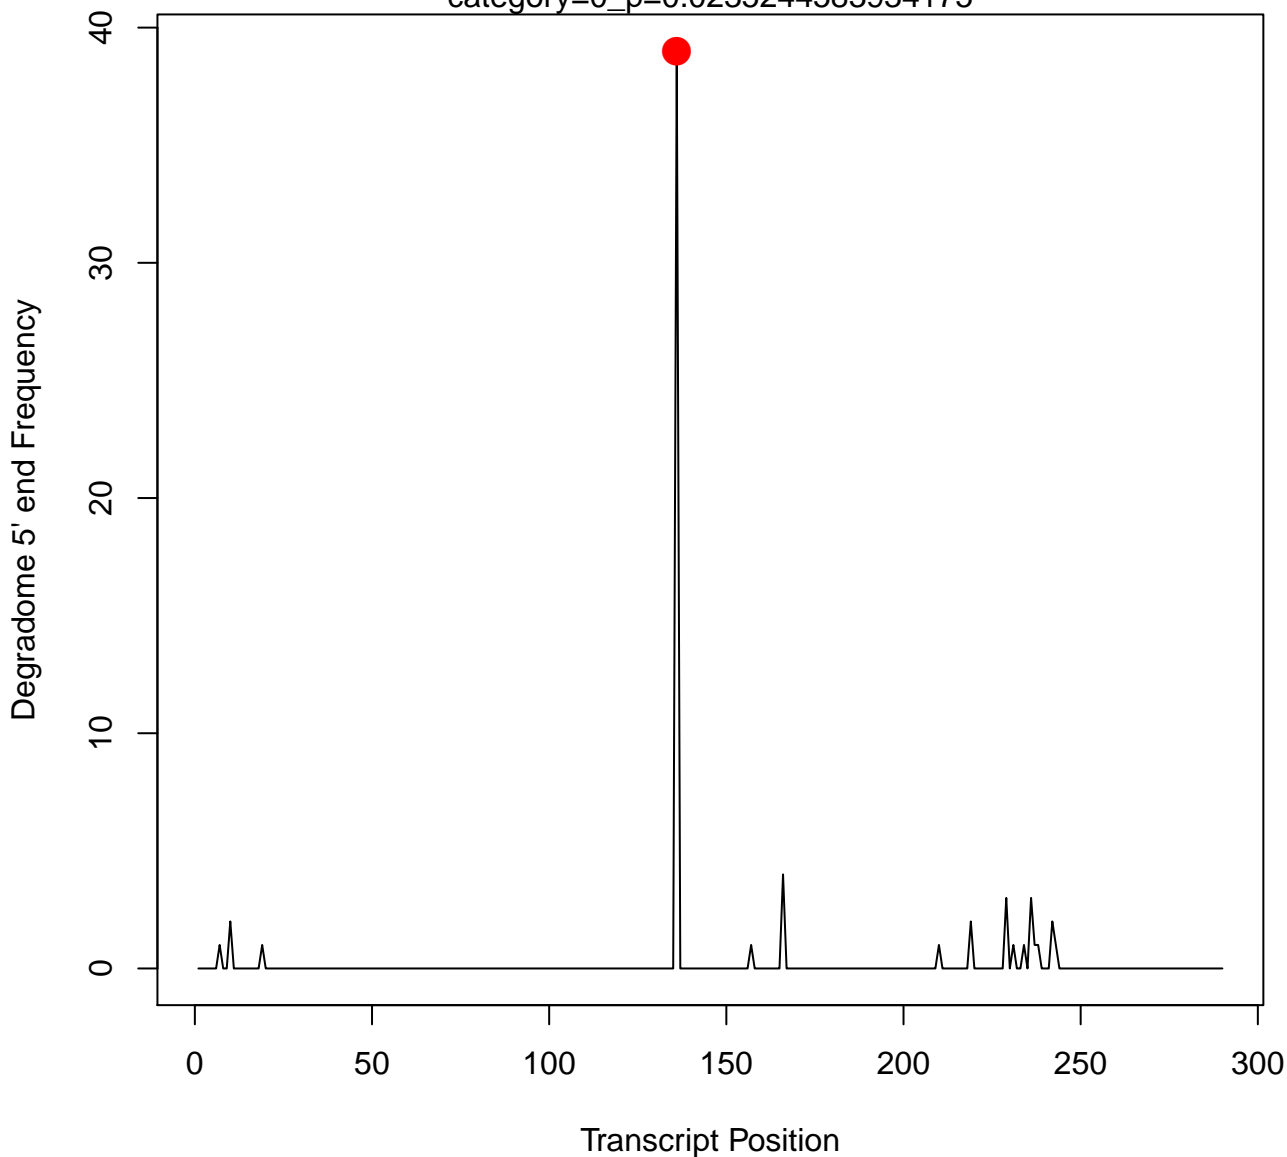

Supplement: s1 [file s1]

**T=Cluster-18410.95957\_Q=novel\_82\_S=325**

category=0\_p=0.000547104903662499

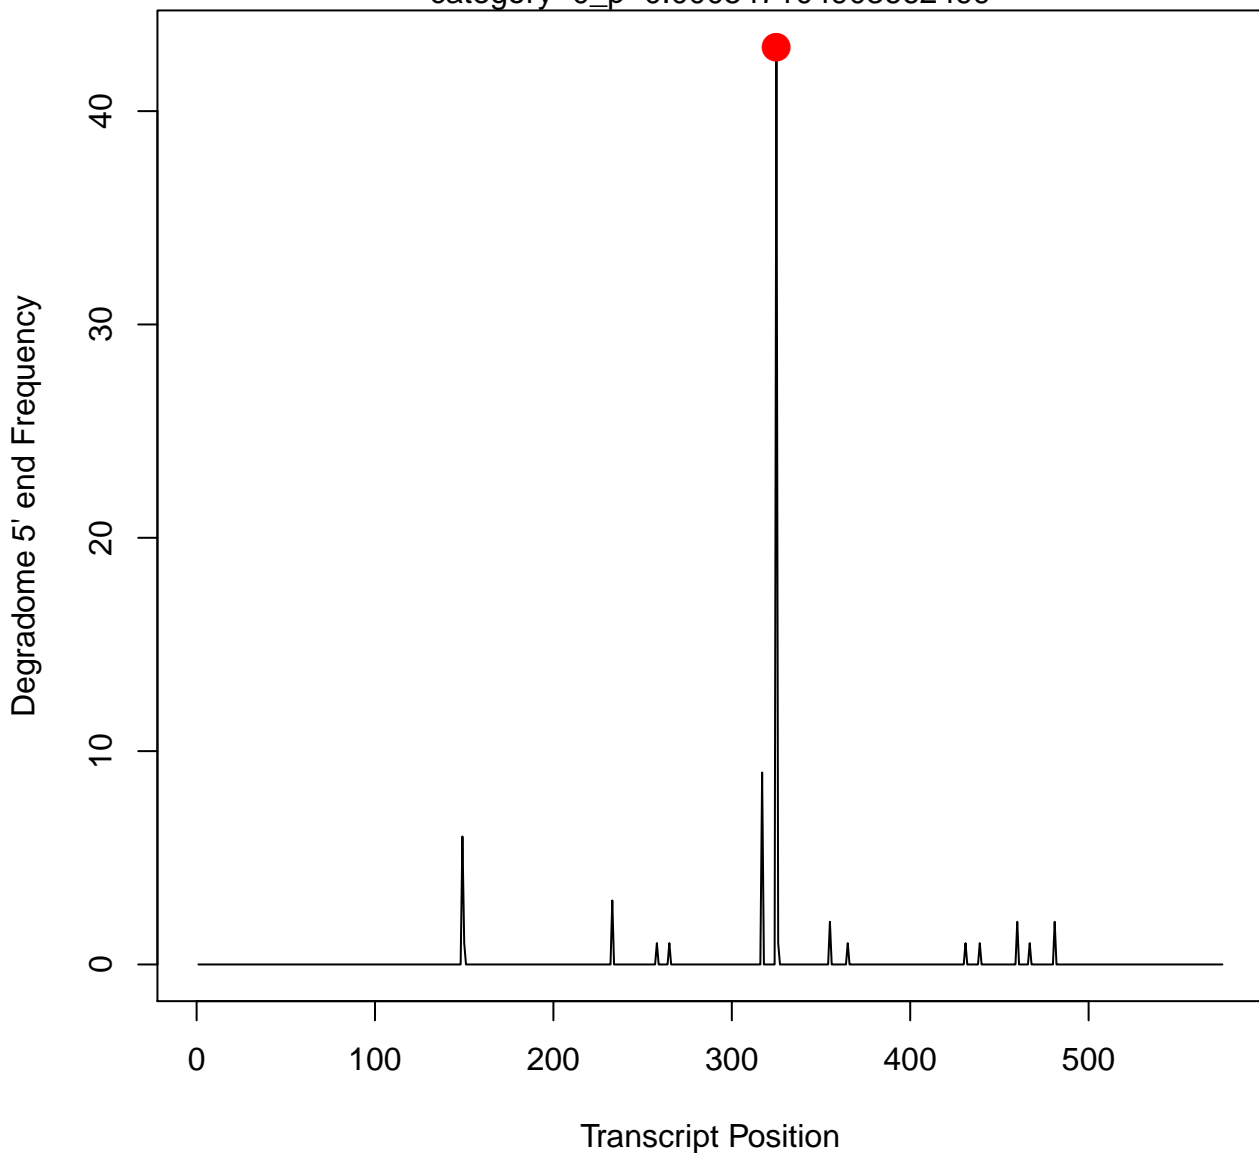

Supplement: s1 [file s1]

**T=Cluster-18410.44342\_Q=pma-miR951\_S=321**

category=0\_p=0.00027358987754178

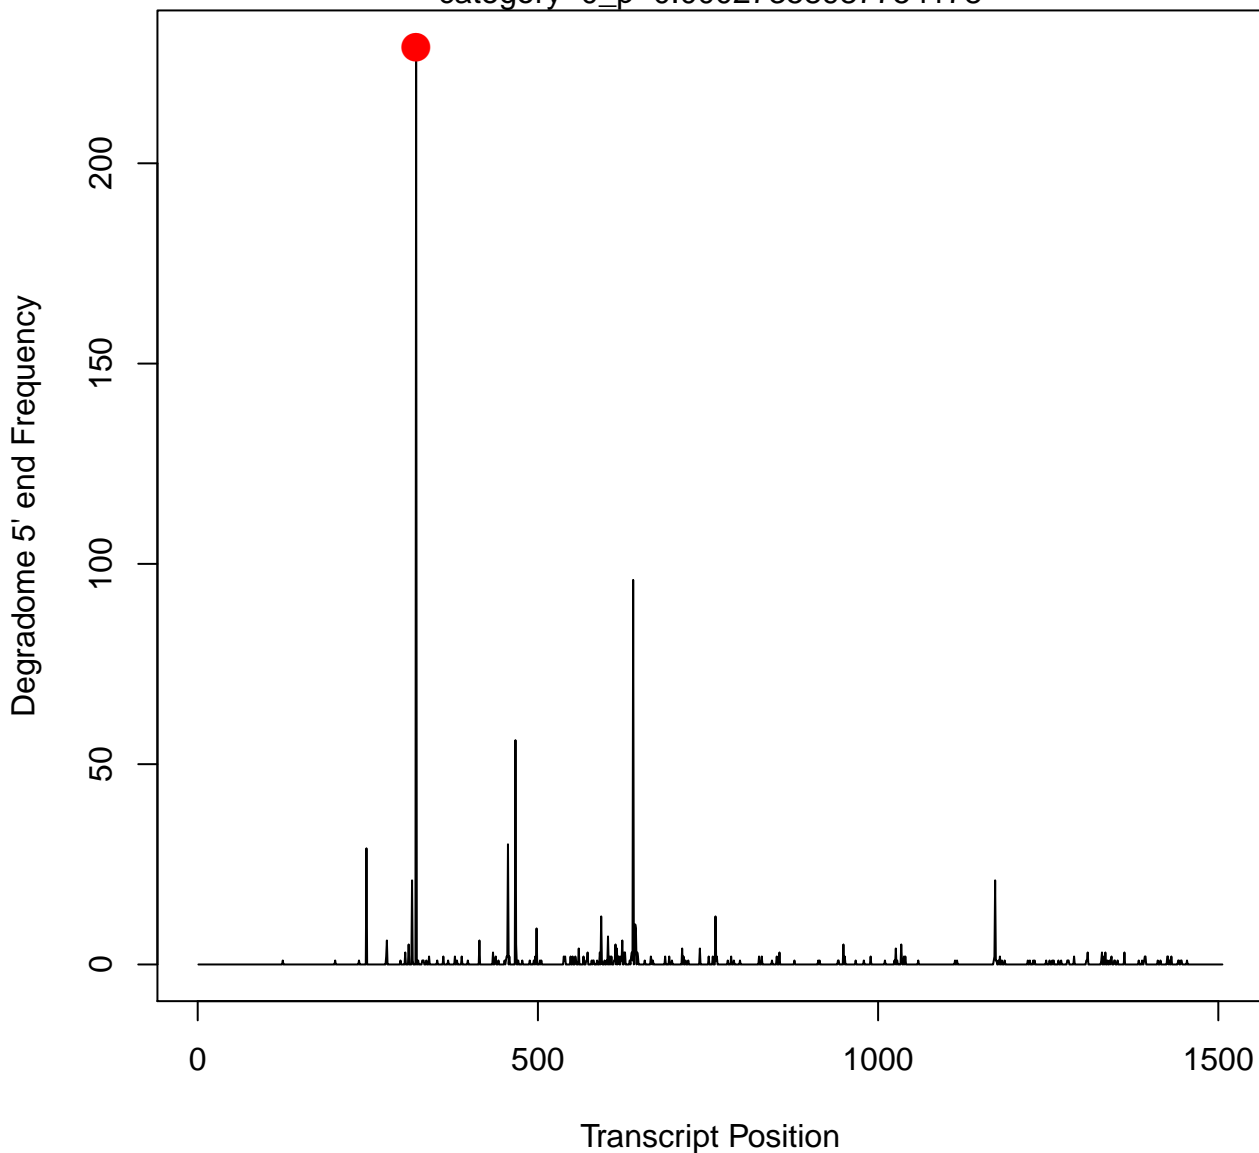

Supplement: s1 [file s1]

**T=Cluster-18410.104533\_Q=novel\_34\_S=1426**

category=1\_p=0.0176243664206269

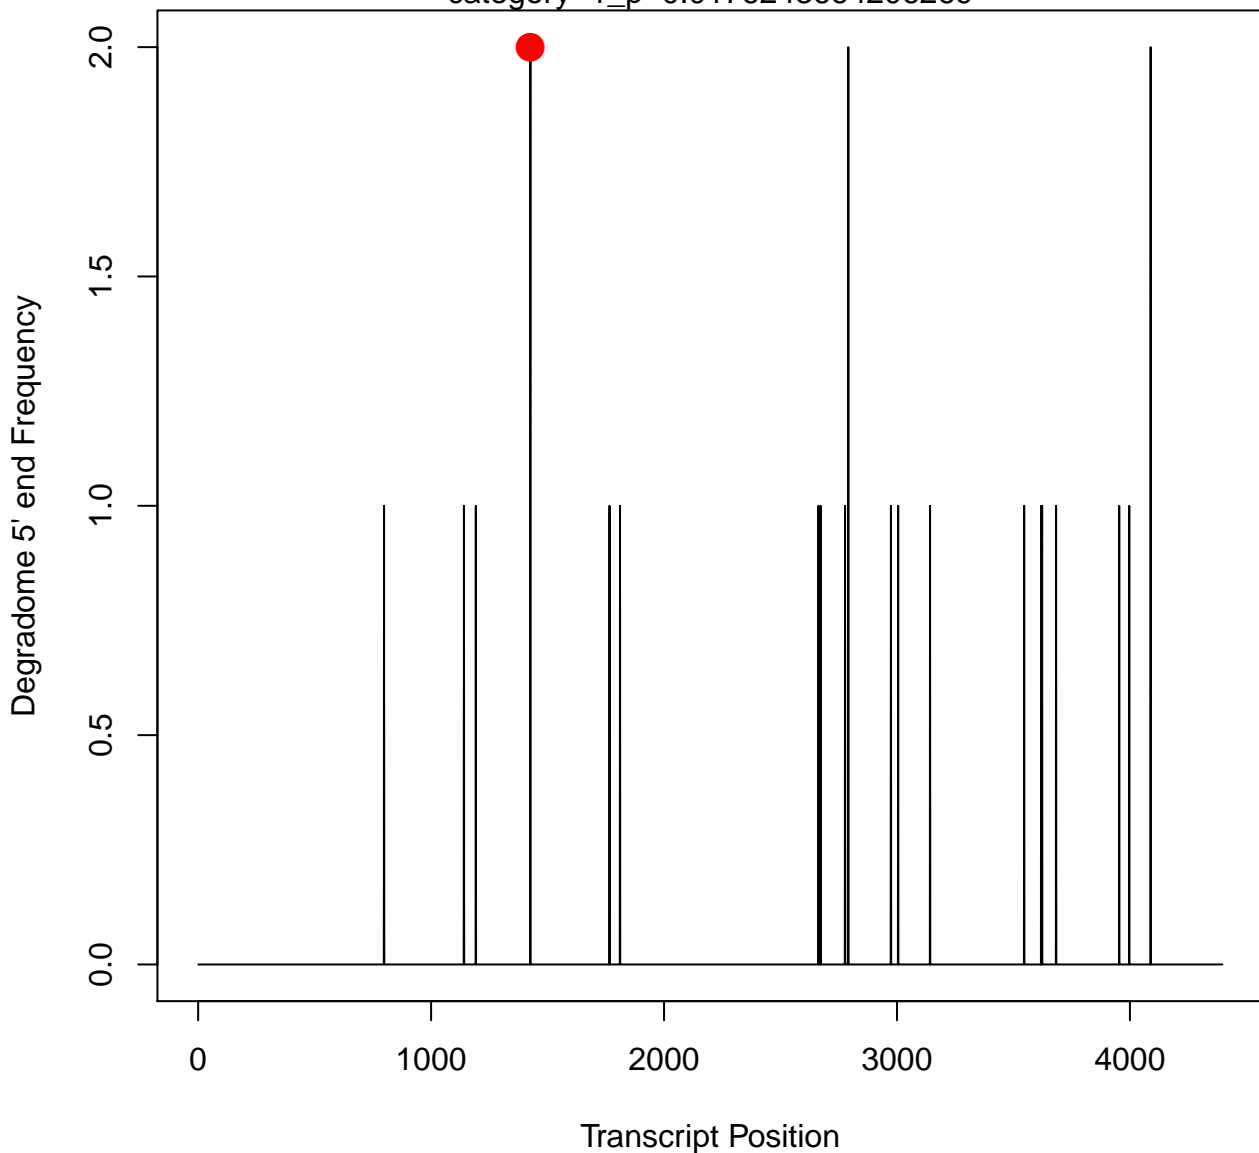

Supplement: s1 [file s1]

**T=Cluster-18410.69872\_Q=novel\_32\_S=925**

category=0\_p=0.00355083585007077

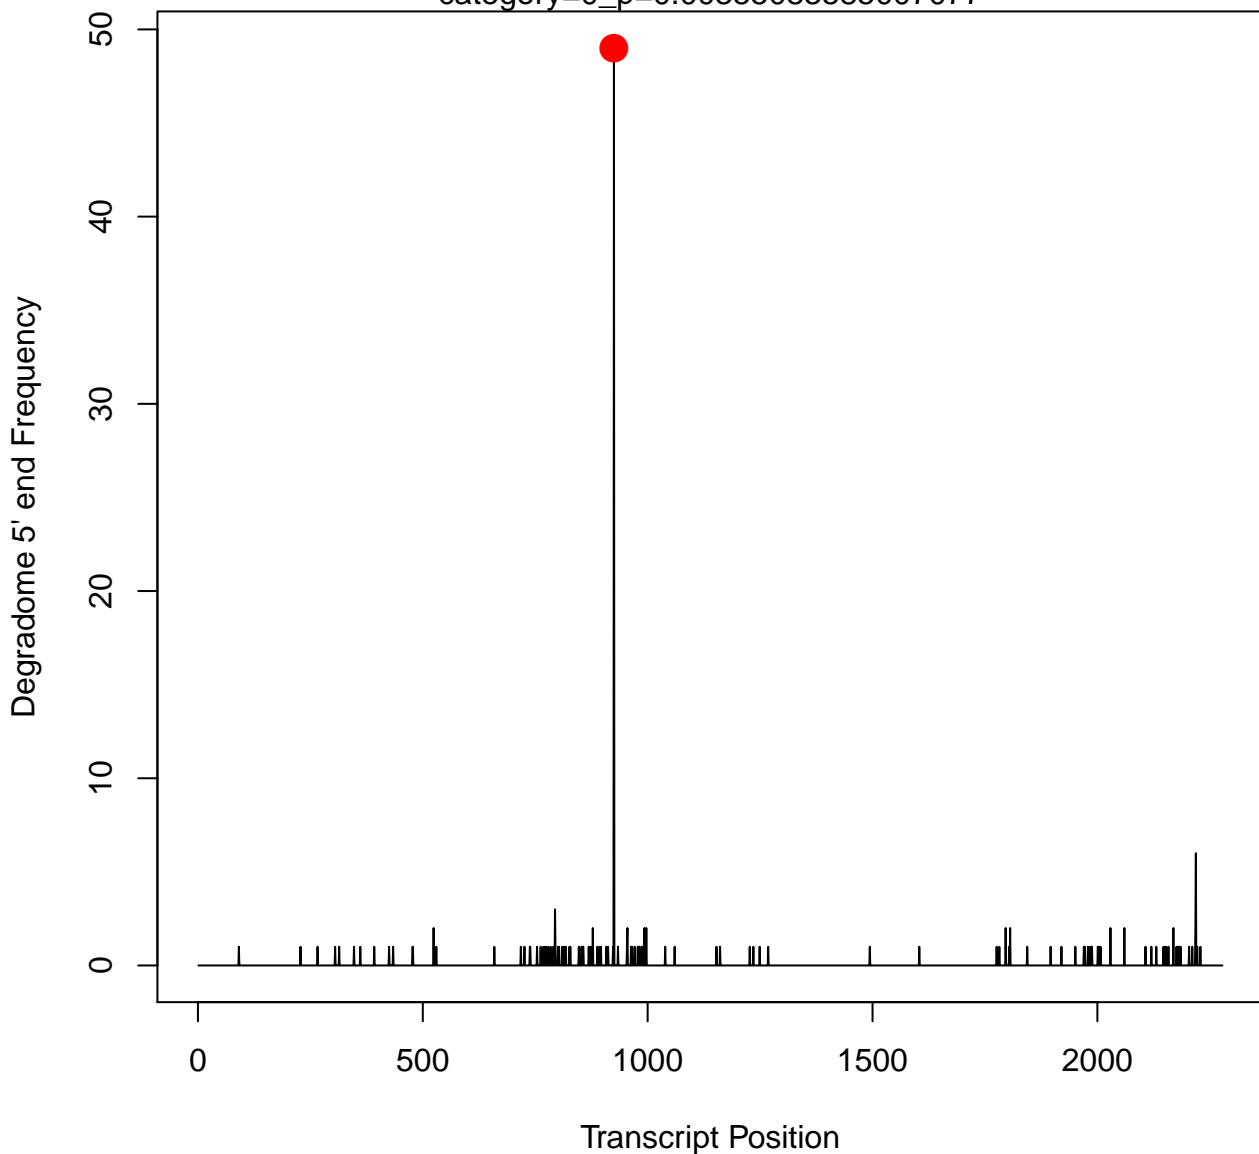

Supplement: s1 [file s1]

**T=Cluster-18410.32109\_Q=novel\_151\_S=149**

category=2\_p=0.0454020367599618

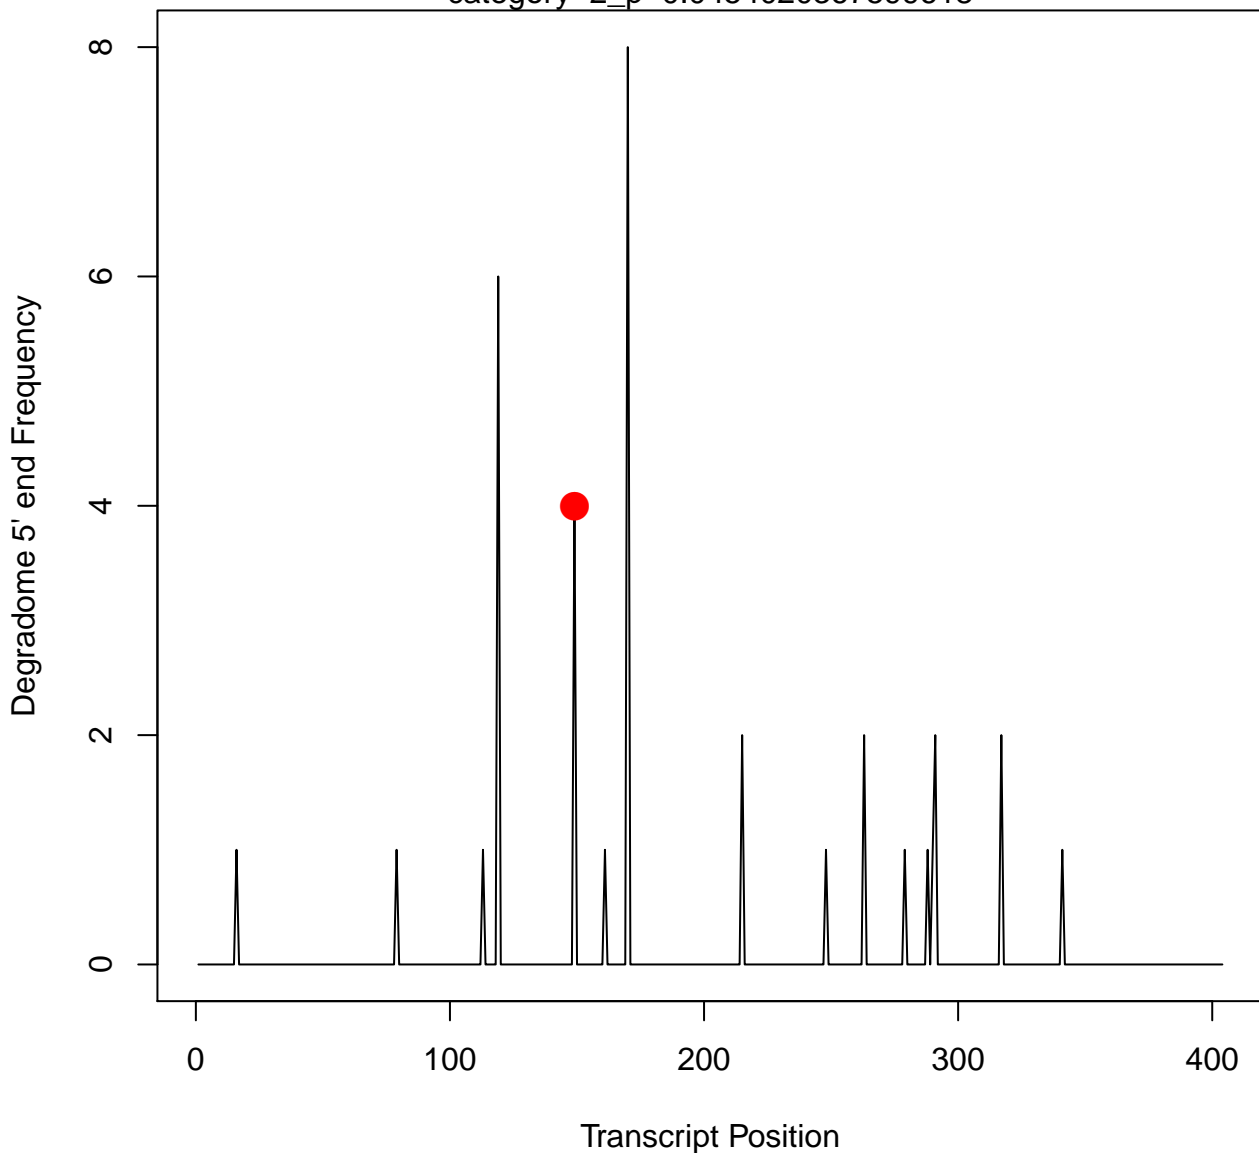

Supplement: s1 [file s1]

**T=Cluster-18410.117128\_Q=novel\_82\_S=499**

category=0\_p=0.0962857870868653

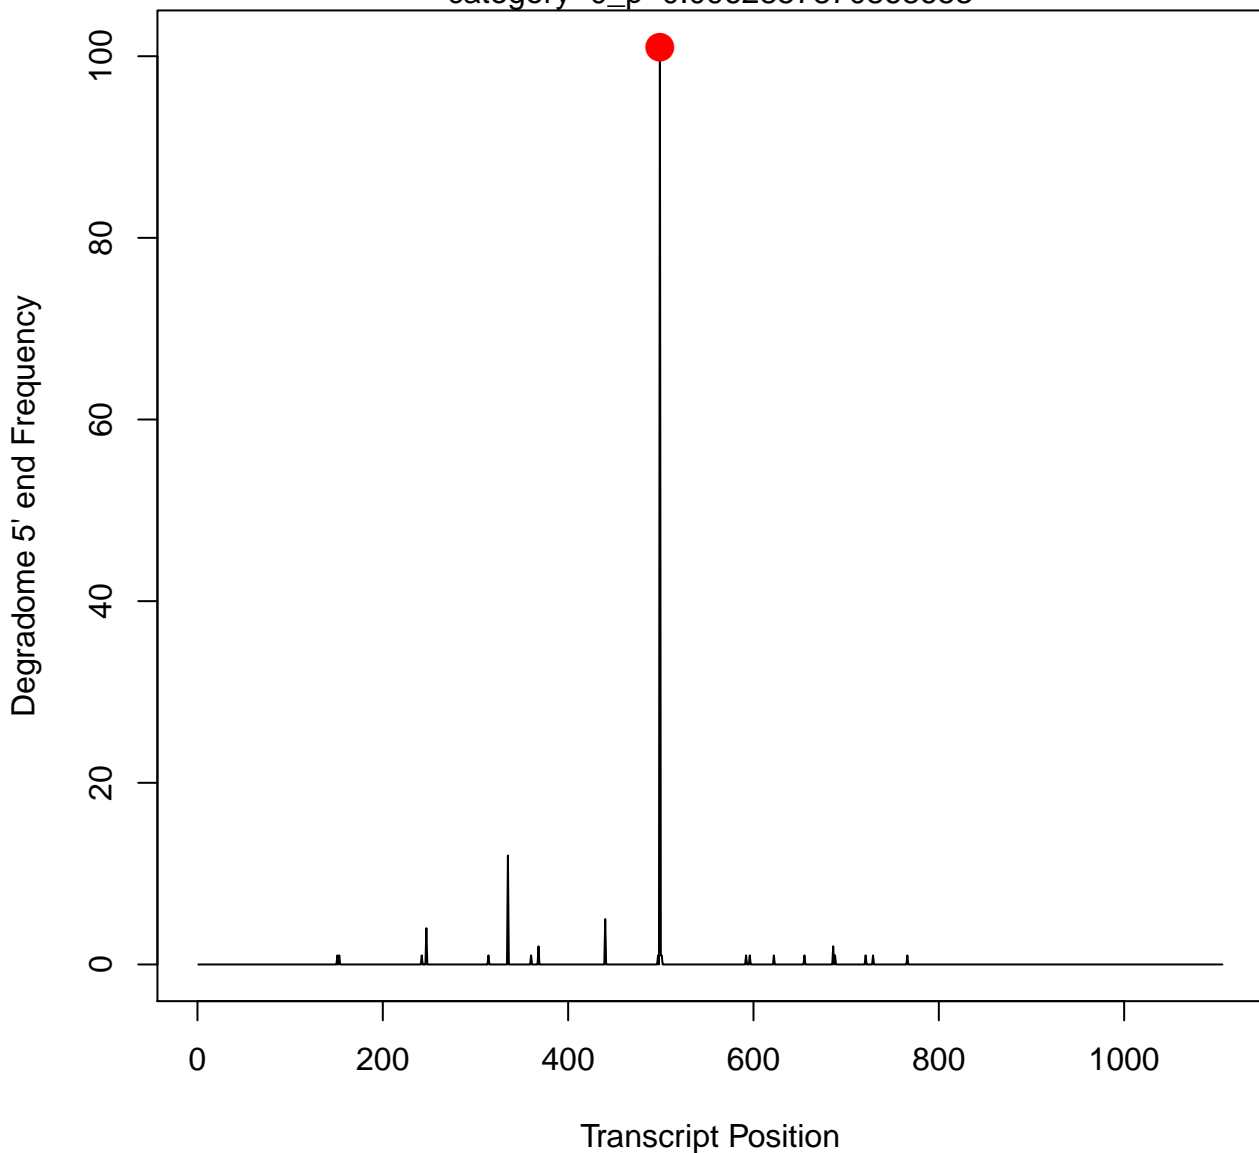

Supplement: s1 [file s1]

**T=Cluster-18410.4683\_Q=pma-miR482a\_S=185**

category=0\_p=0.00926018647366955

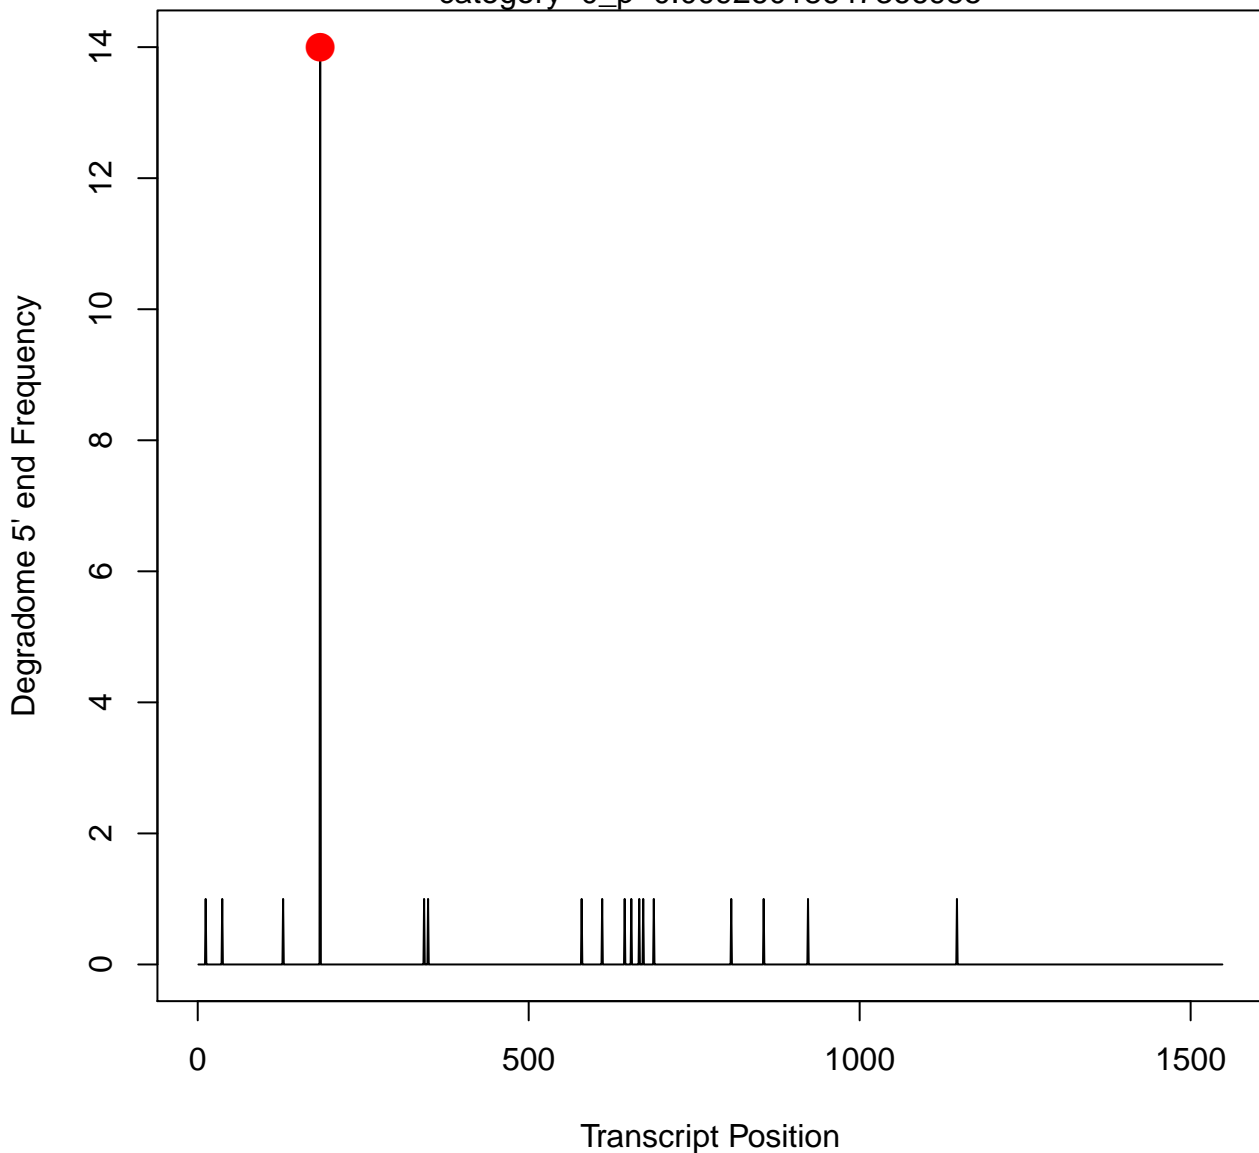

Supplement: s1 [file s1]

**T=Cluster-18410.112456\_Q=novel\_168\_S=245**

category=2\_p=0.0342485307007228

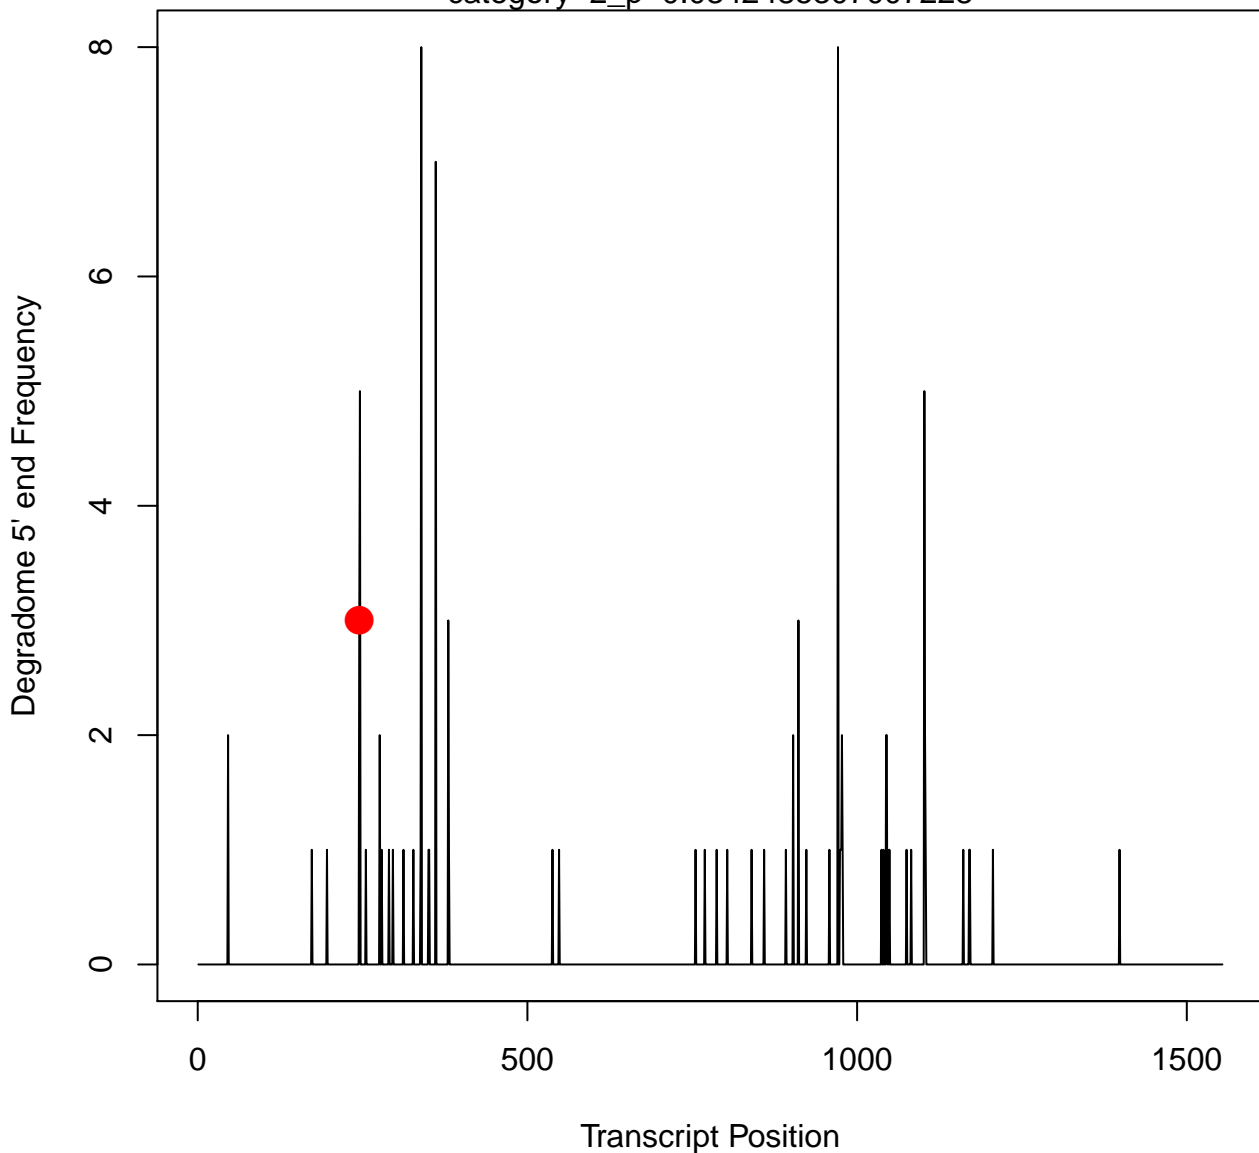

Supplement: s1 [file s1]

**T=Cluster-18410.73766\_Q=novel\_11\_S=826**

category=4\_p=0.0483072886549676

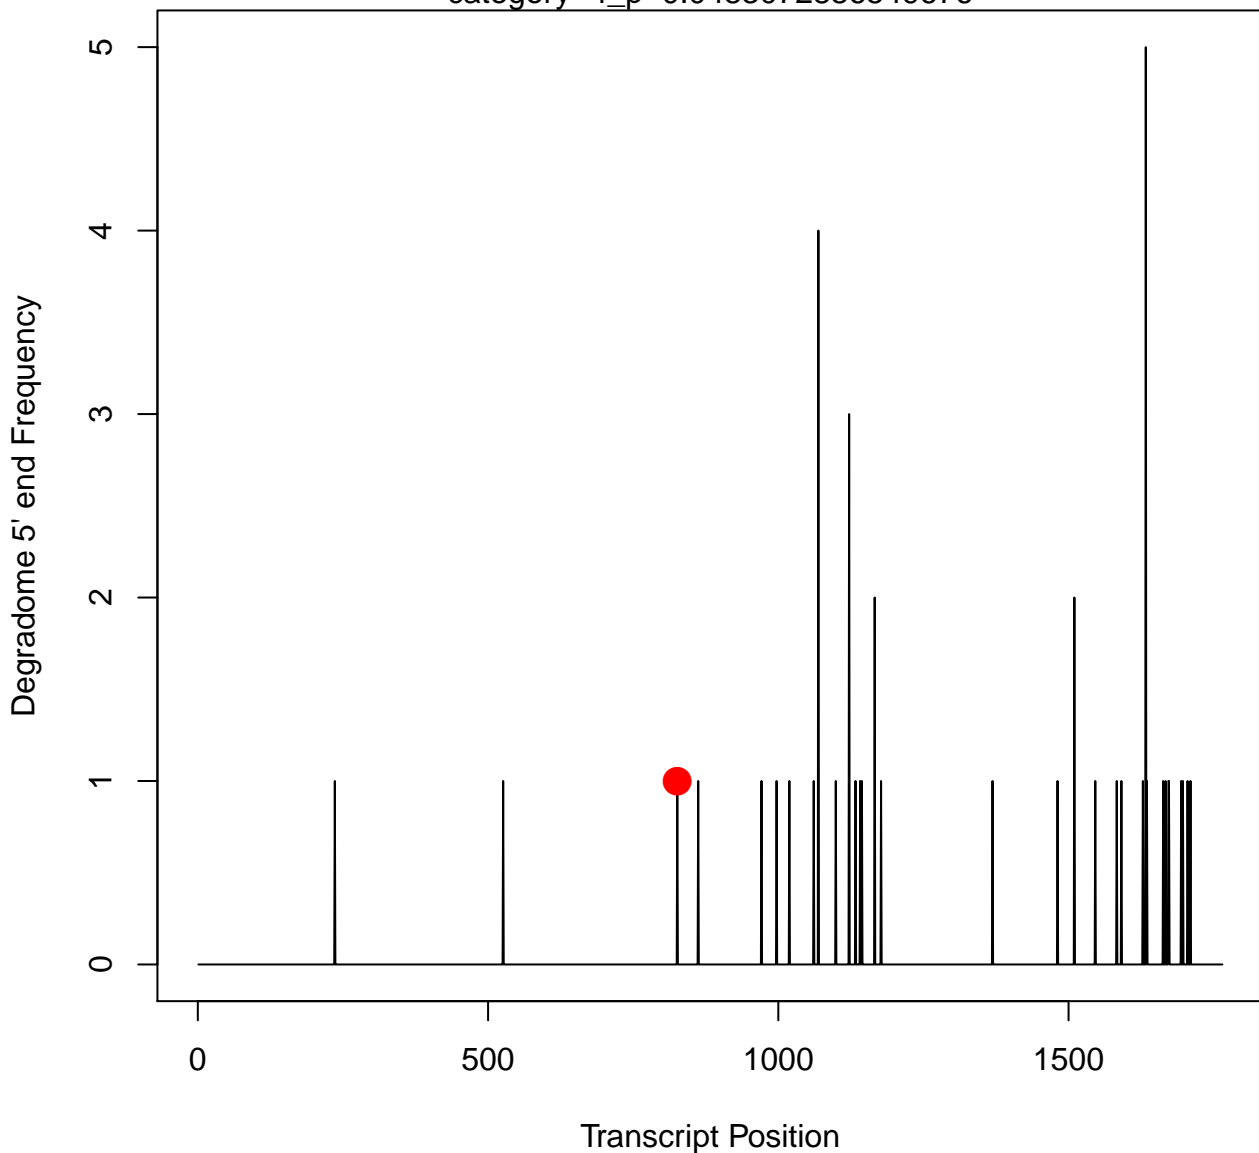

Supplement: s1 [file s1]

**T=Cluster-18410.65485\_Q=novel\_195\_S=987**

category=0\_p=0.000547104903662499

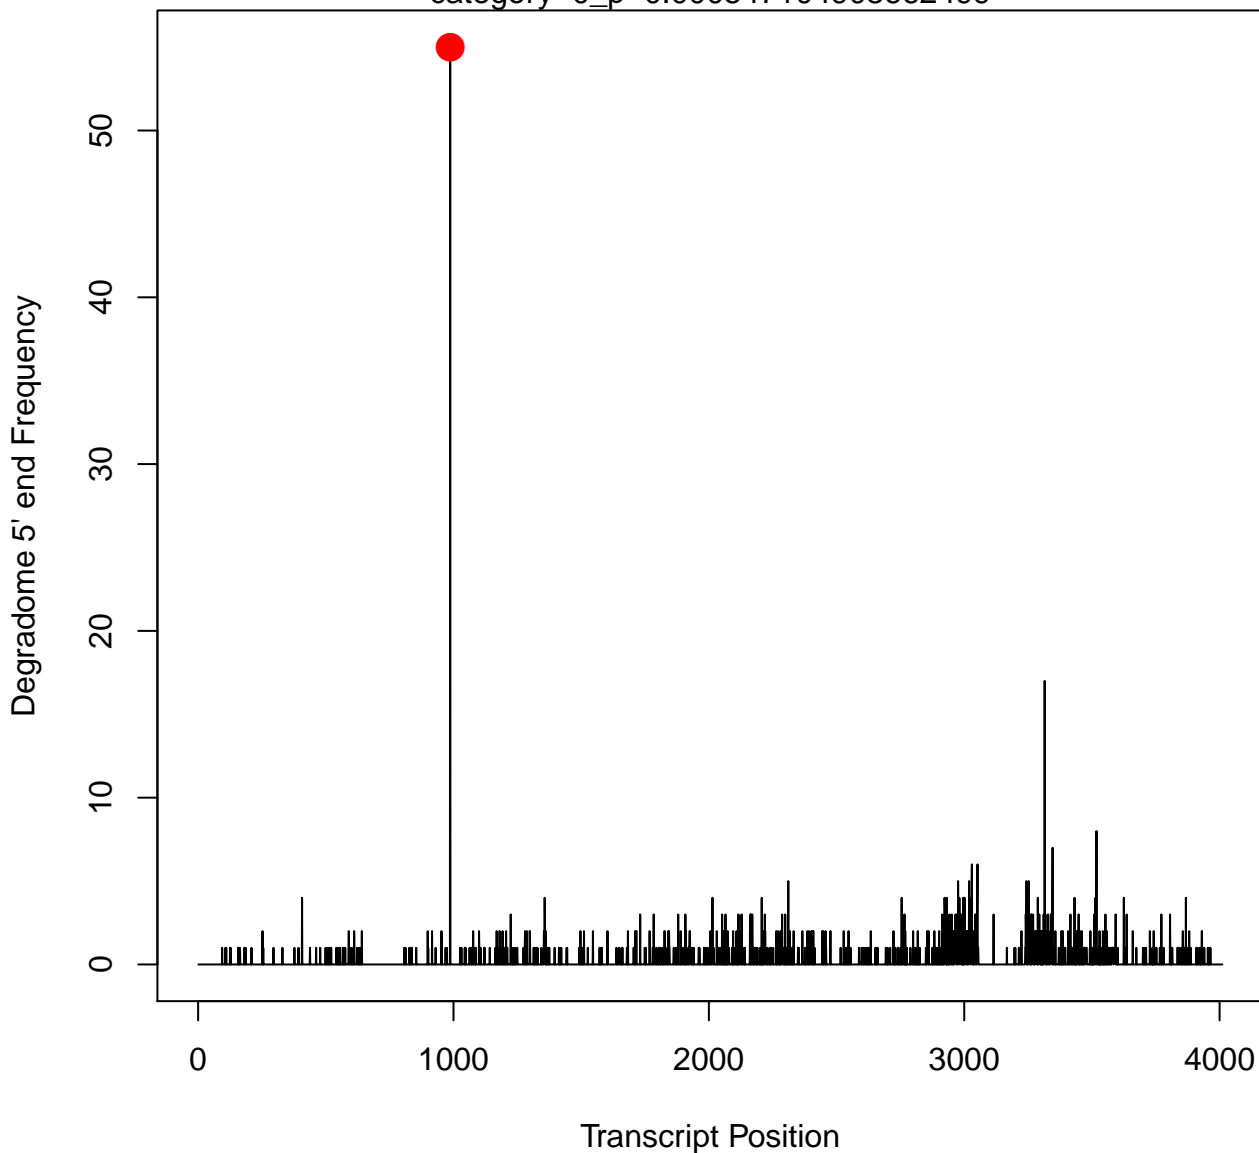

Supplement: s1 [file s1]

**T=Cluster-18410.16172\_Q=pma-miR947\_S=72**

category=0\_p=0.00382345425486719

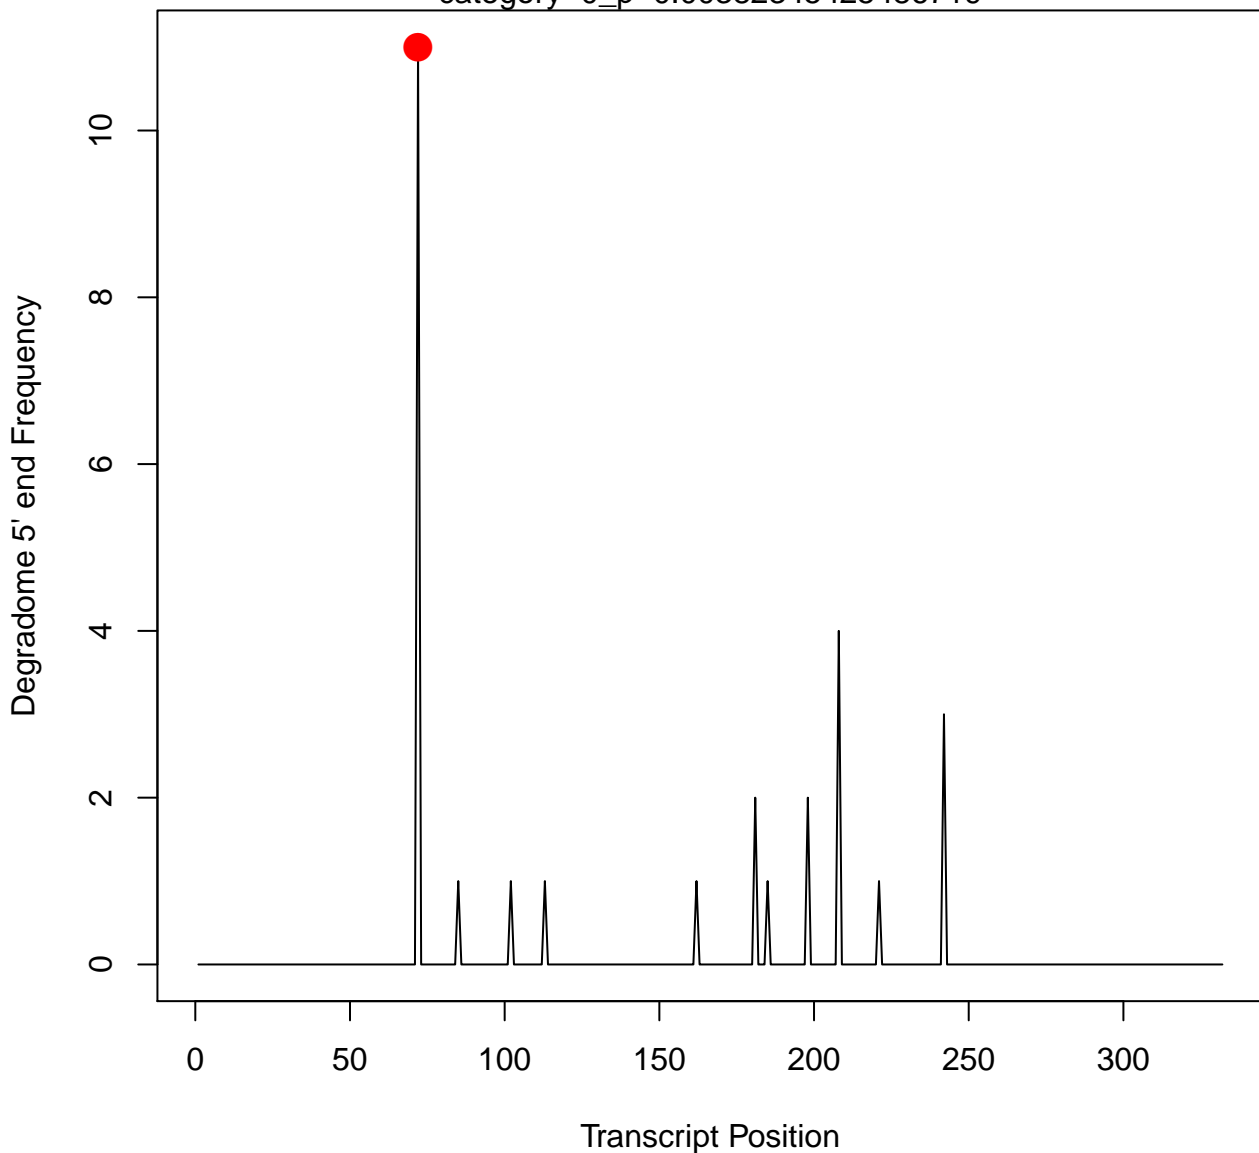

Supplement: s1 [file s1]

**T=Cluster-18410.66526\_Q=novel\_127\_S=195**

category=3\_p=0.0781921676015778

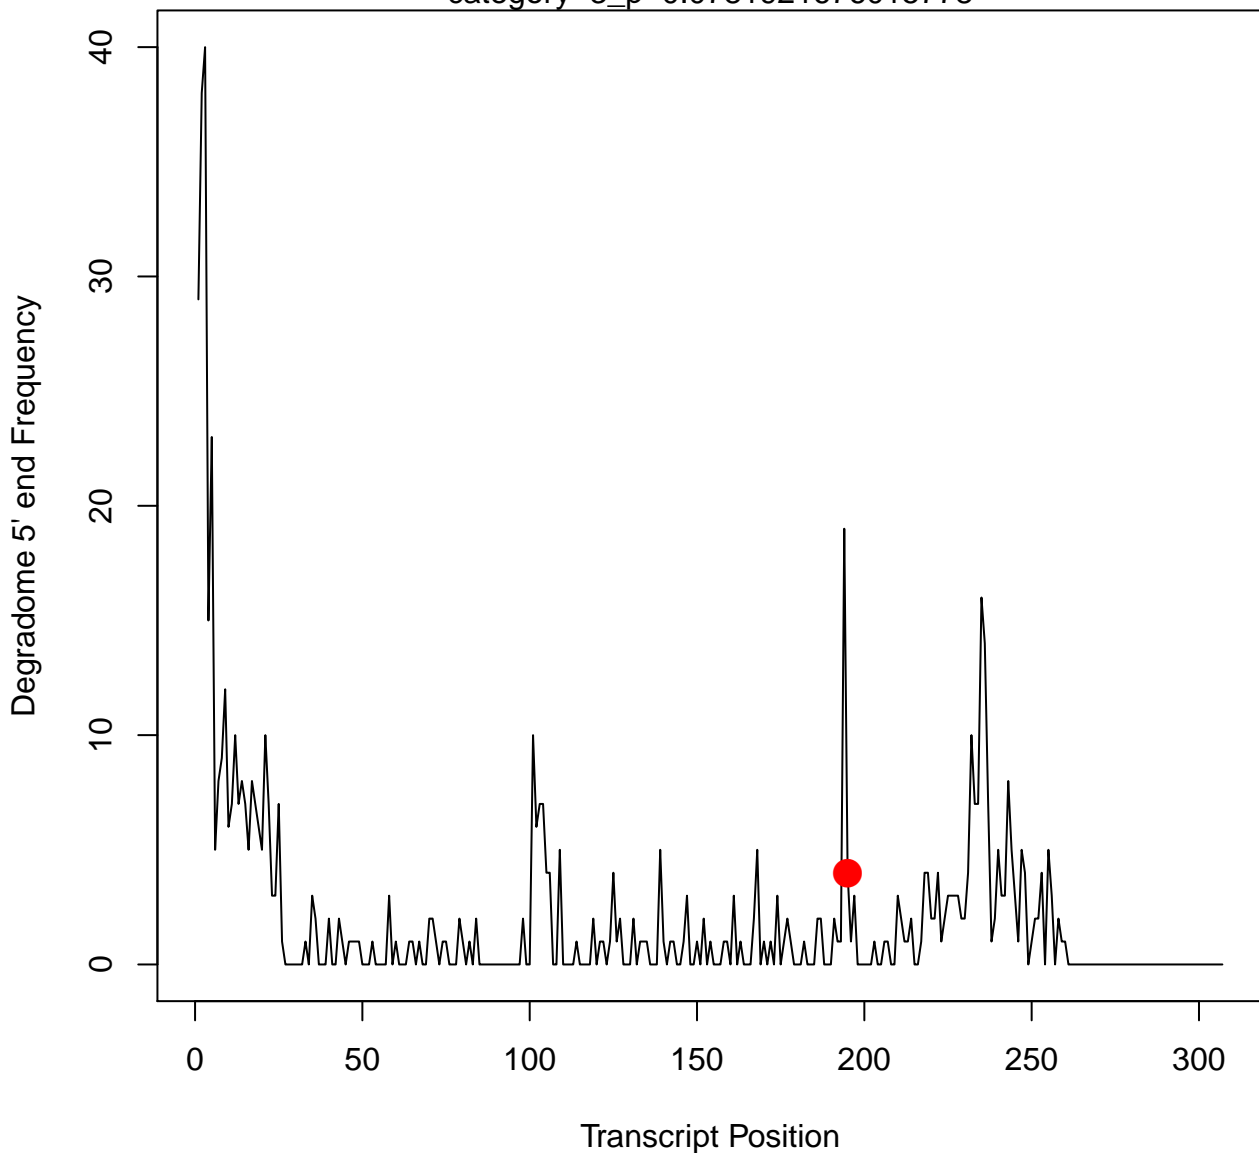

Supplement: s1 [file s1]

**T=Cluster-15462.2\_Q=novel\_42\_S=400**

category=0\_p=0.0130482348291631

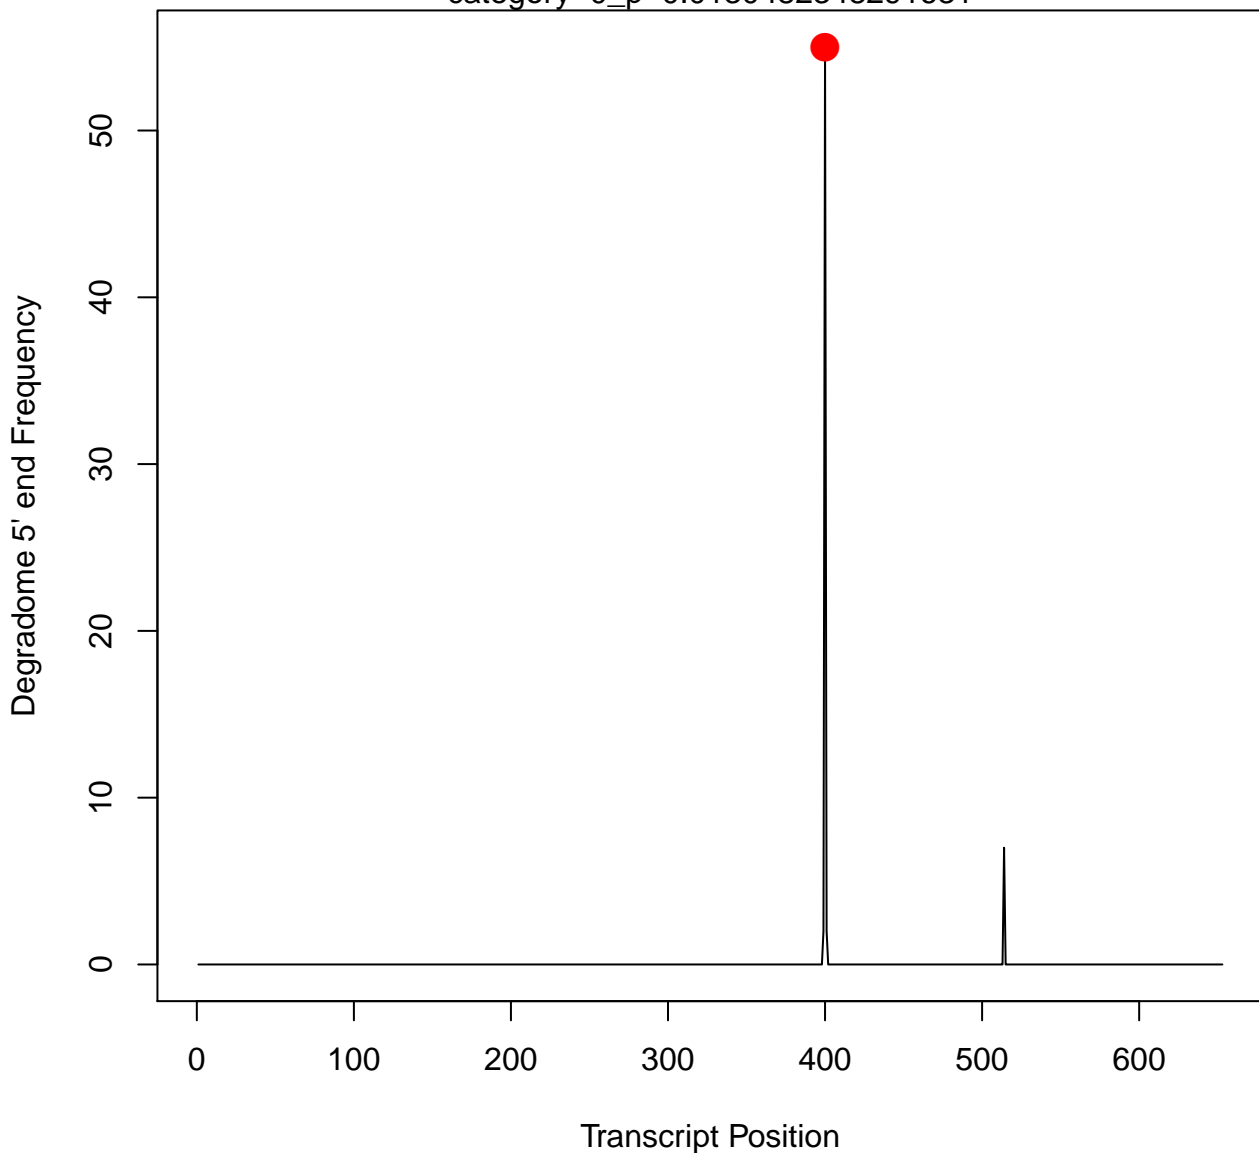

Supplement: s1 [file s1]

**T=Cluster-18410.36503\_Q=novel\_151\_S=476**

category=2\_p=0.0564267304887326

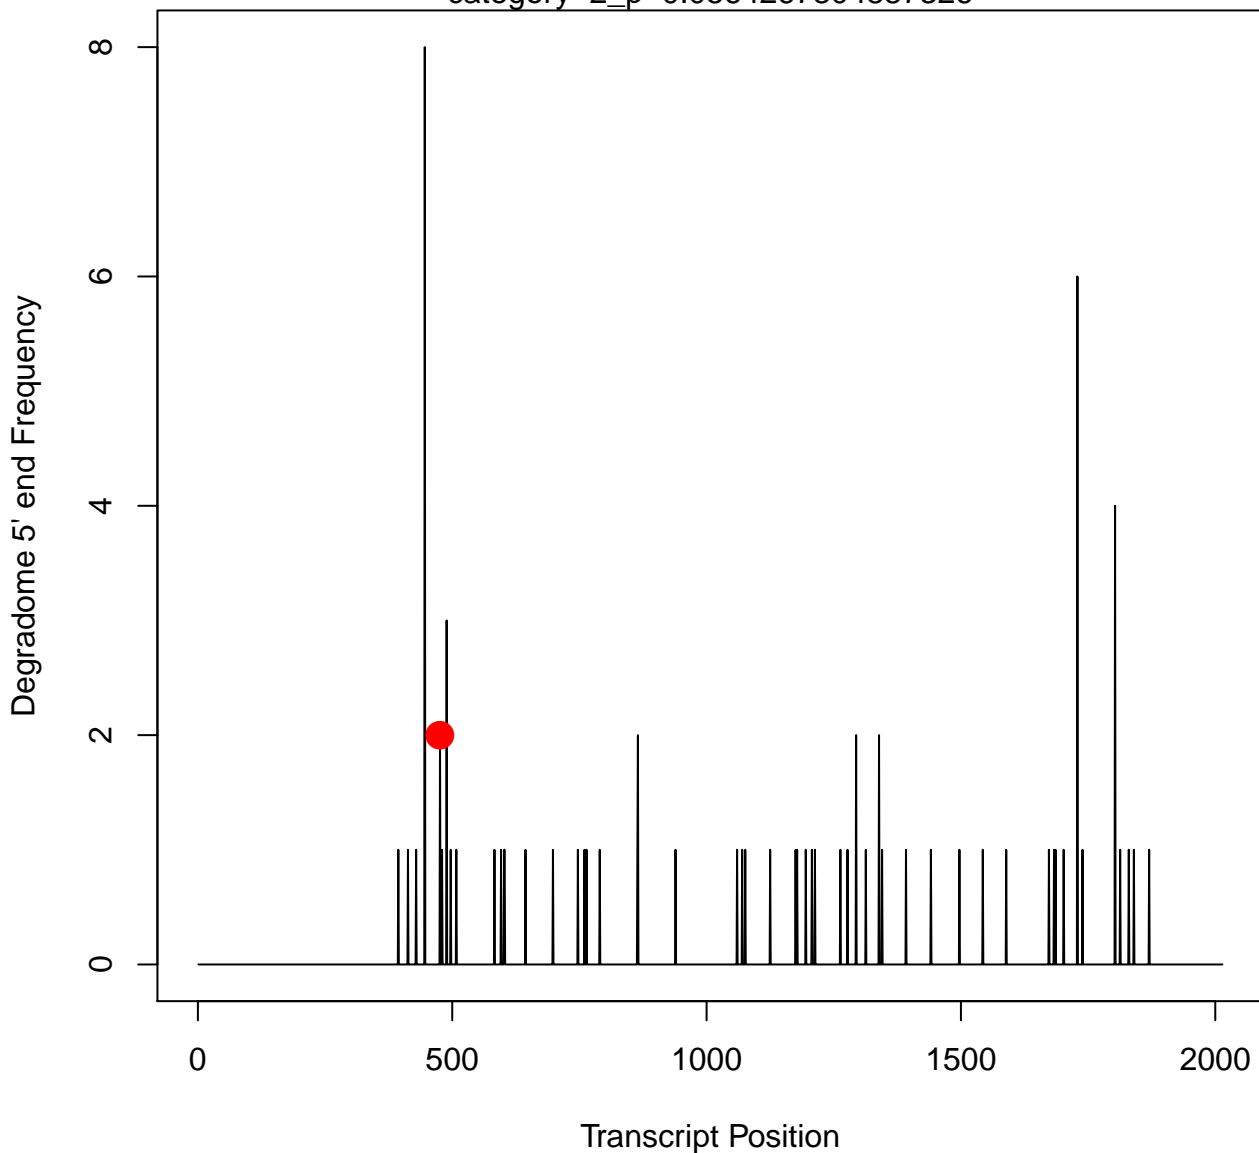

Supplement: s1 [file s1]

**T=Cluster-18410.27464\_Q=novel\_3\_S=232**

category=0\_p=0.000547104903662499

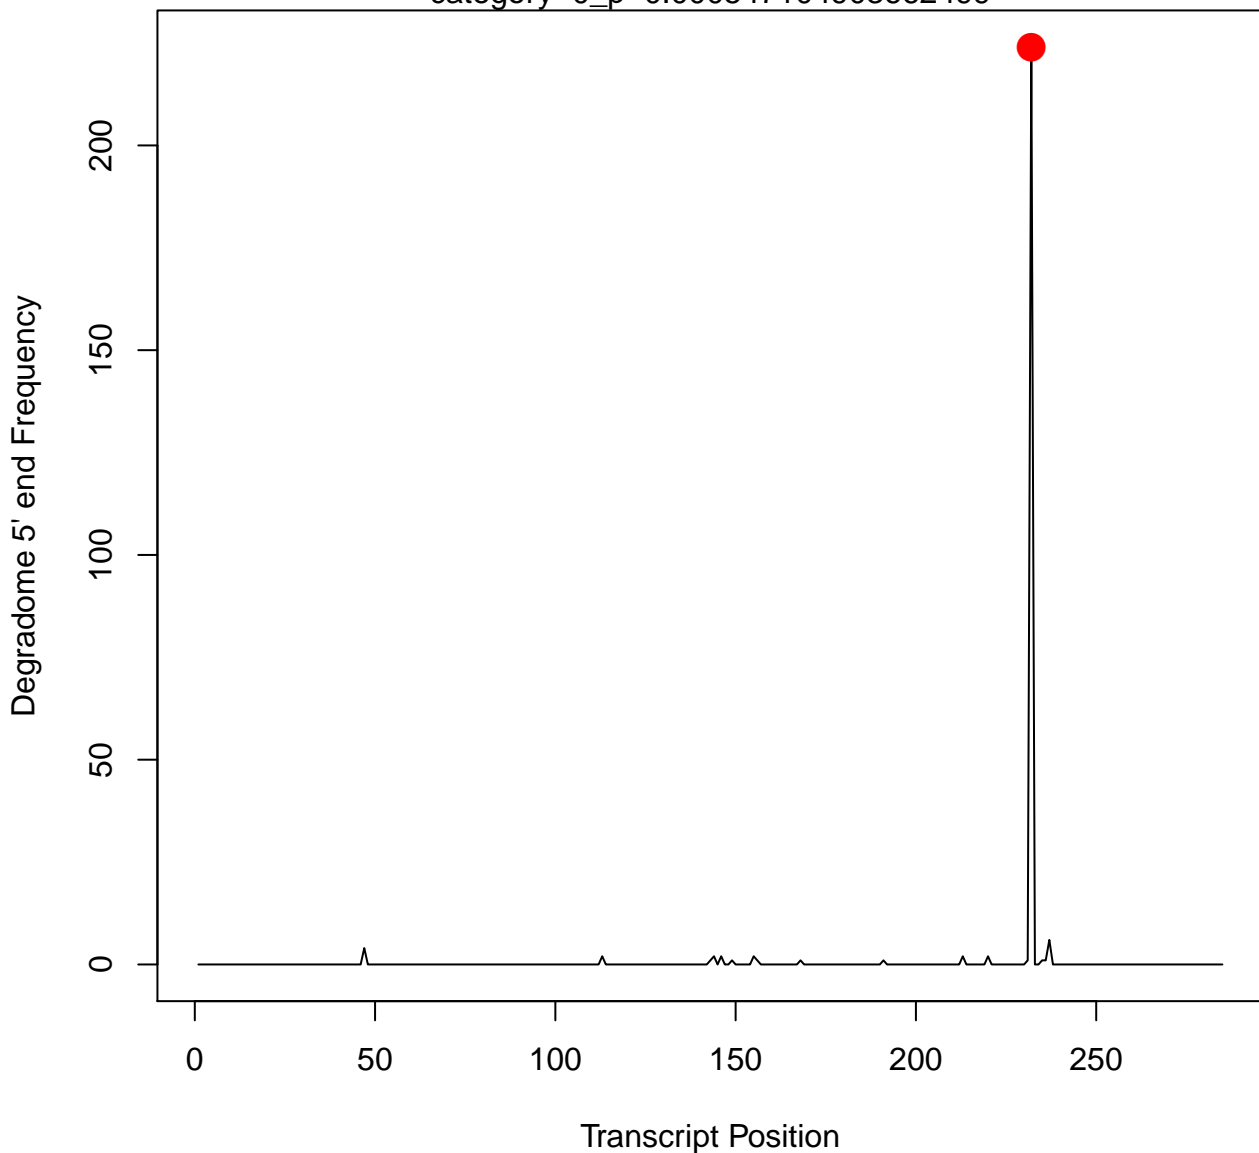

Supplement: s1 [file s1]

**T=Cluster-18410.87952\_Q=novel\_168\_S=1635**

category=0\_p=0.0312423174475176

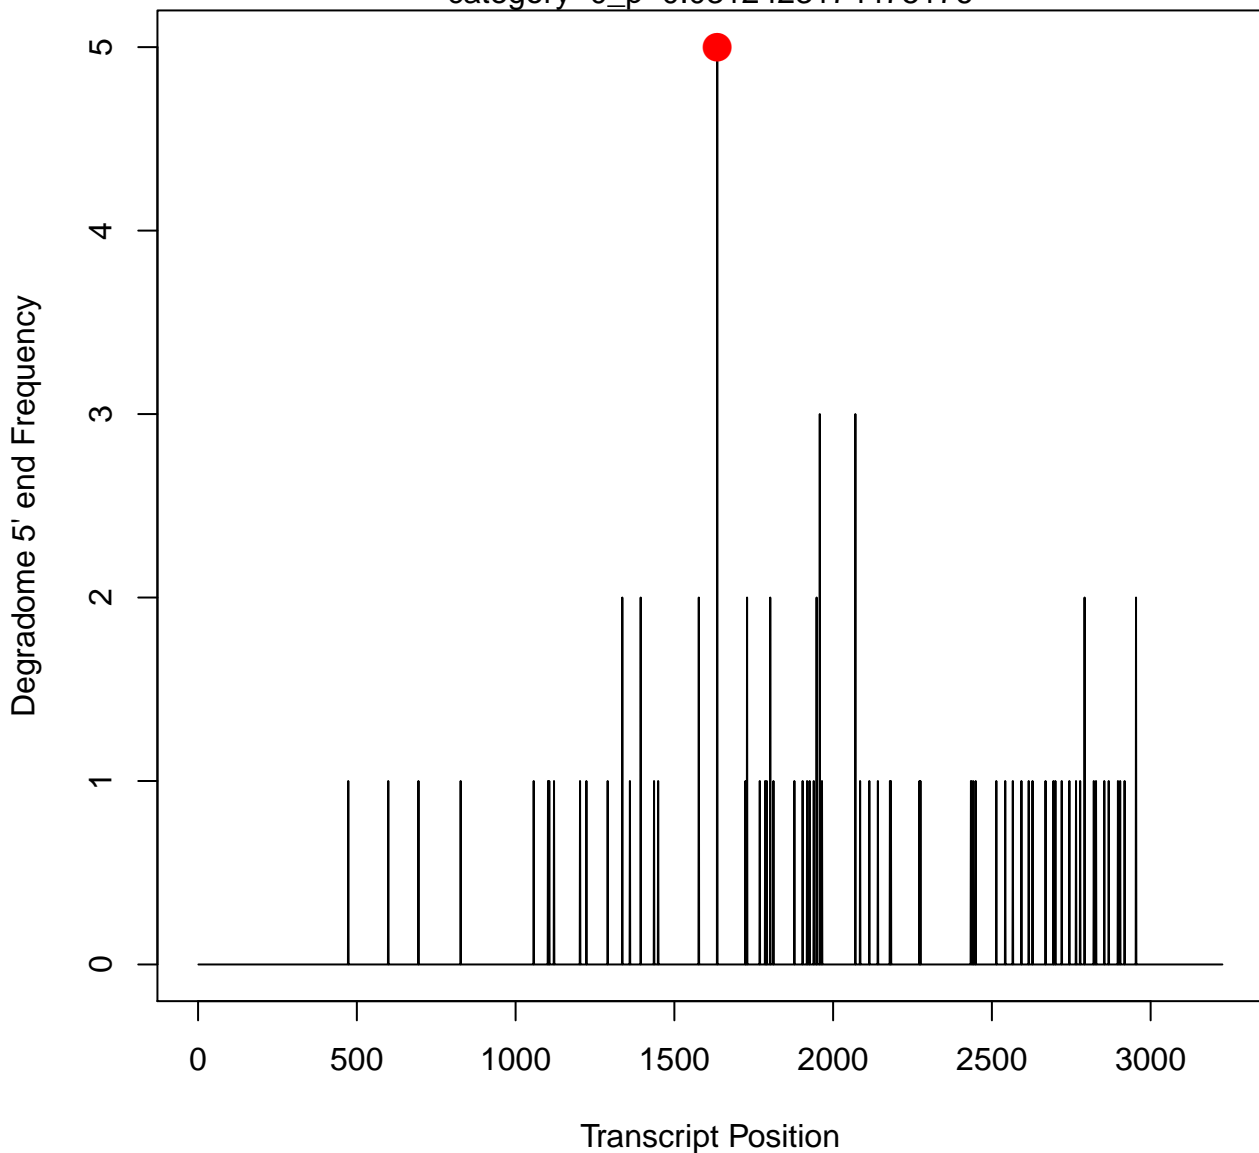

Supplement: s1 [file s1]

**T=Cluster-18410.66526\_Q=novel\_183\_S=194**

category=2\_p=0.0454020367599618

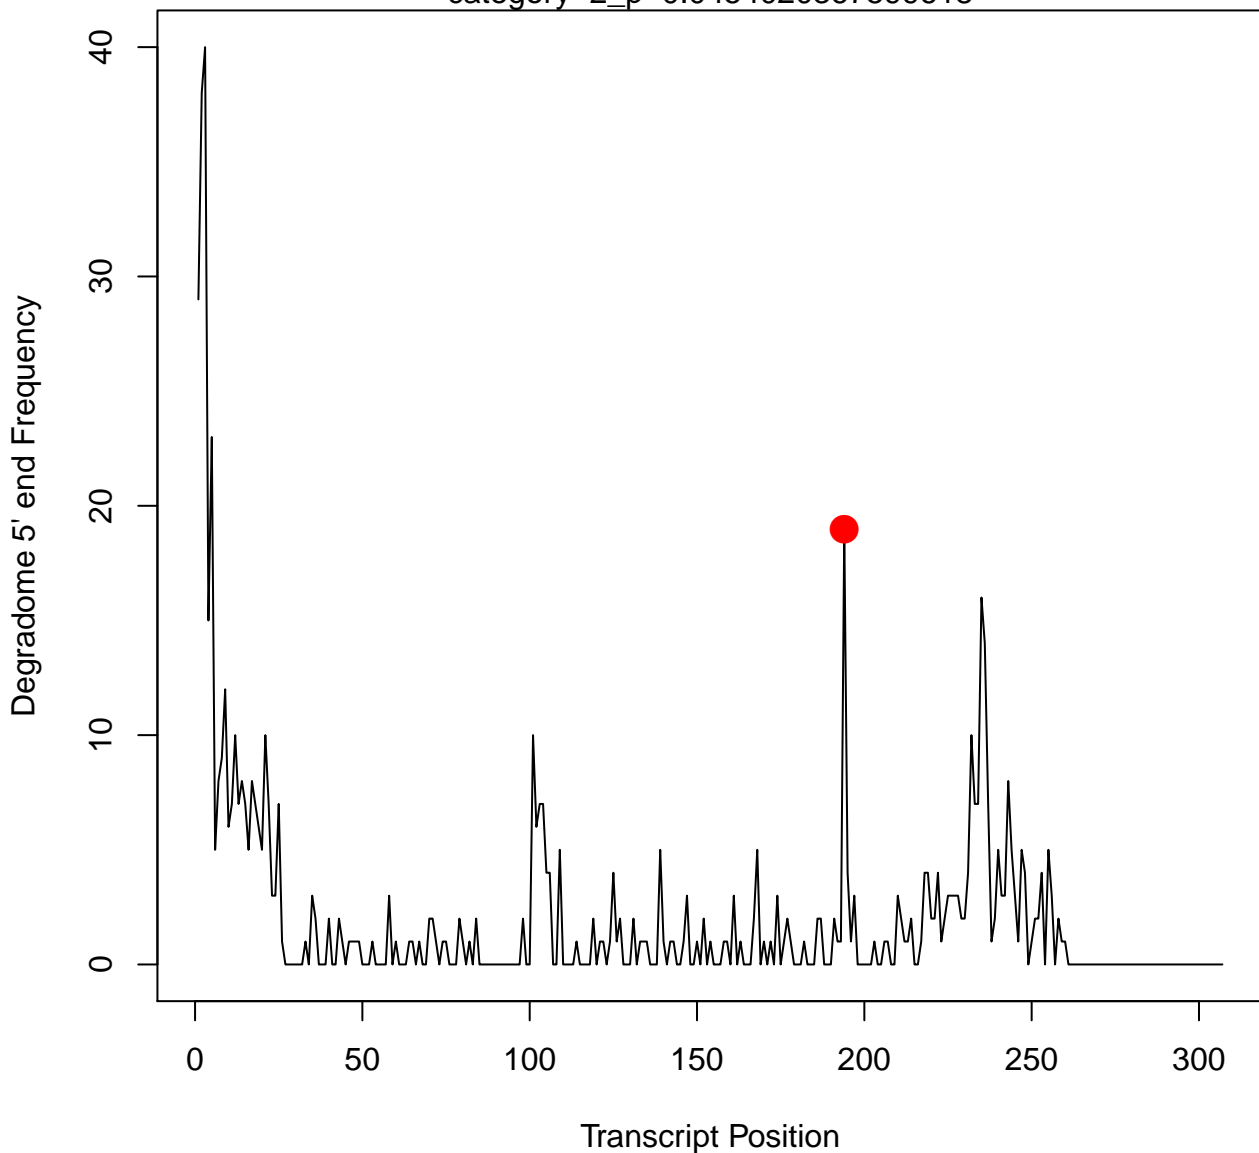

Supplement: s1 [file s1]

**T=Cluster-18410.13633\_Q=novel\_20\_S=208**

category=1\_p=0.0228203715230622

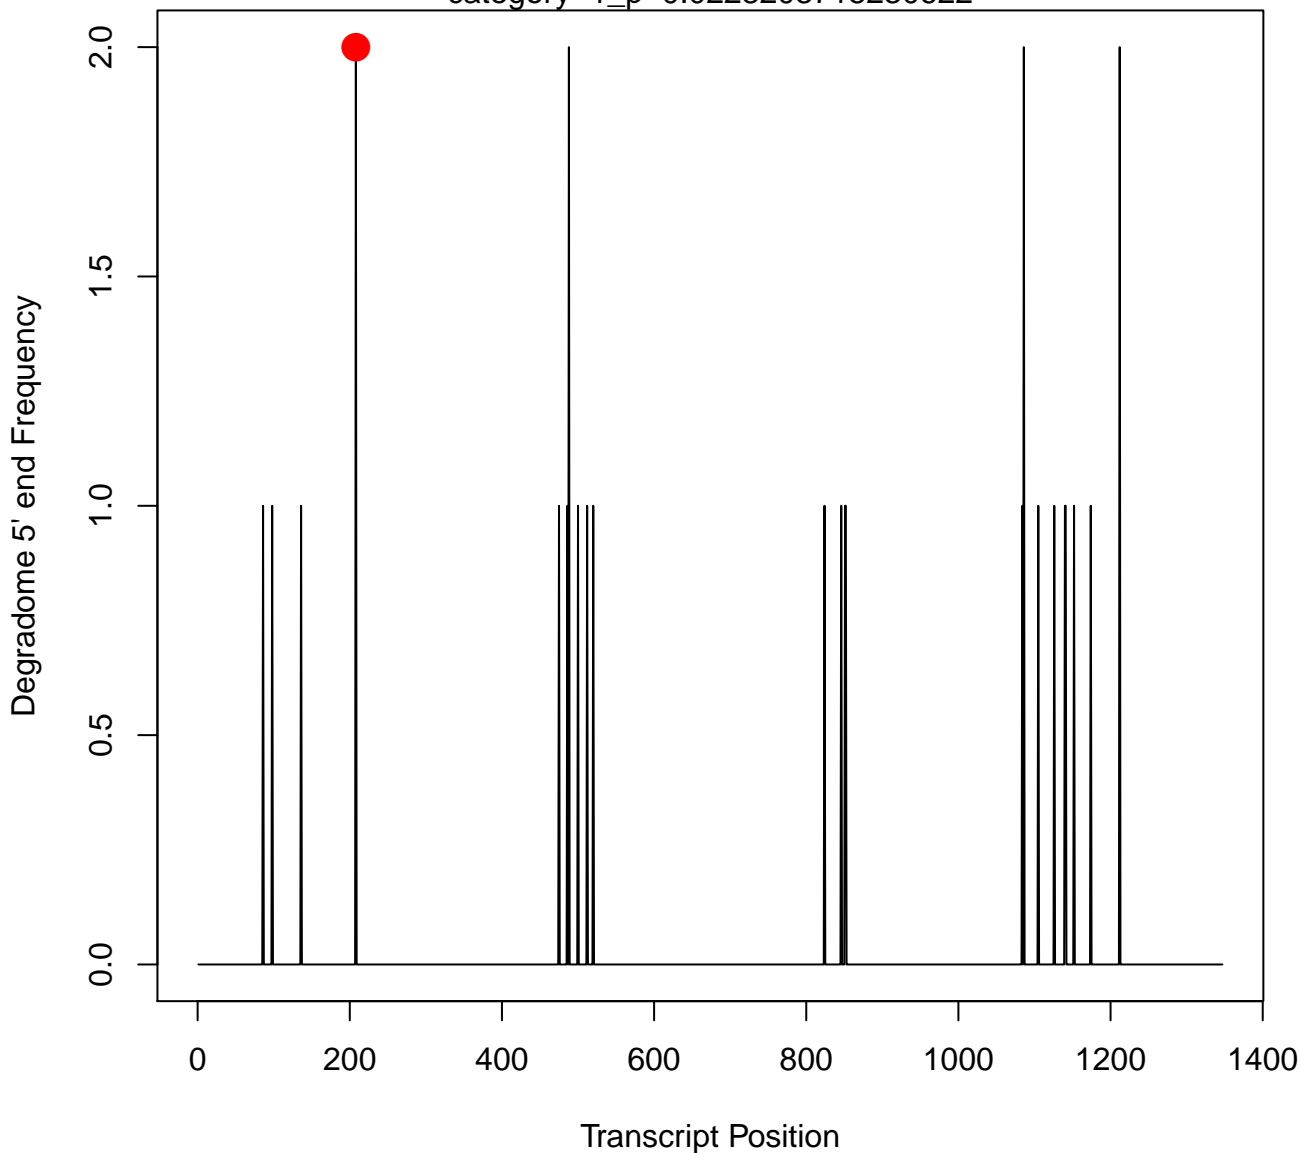

Supplement: s1 [file s1]

**T=Cluster-18410.76363\_Q=novel\_92\_S=1751**

category=0\_p=0.00464086203705827

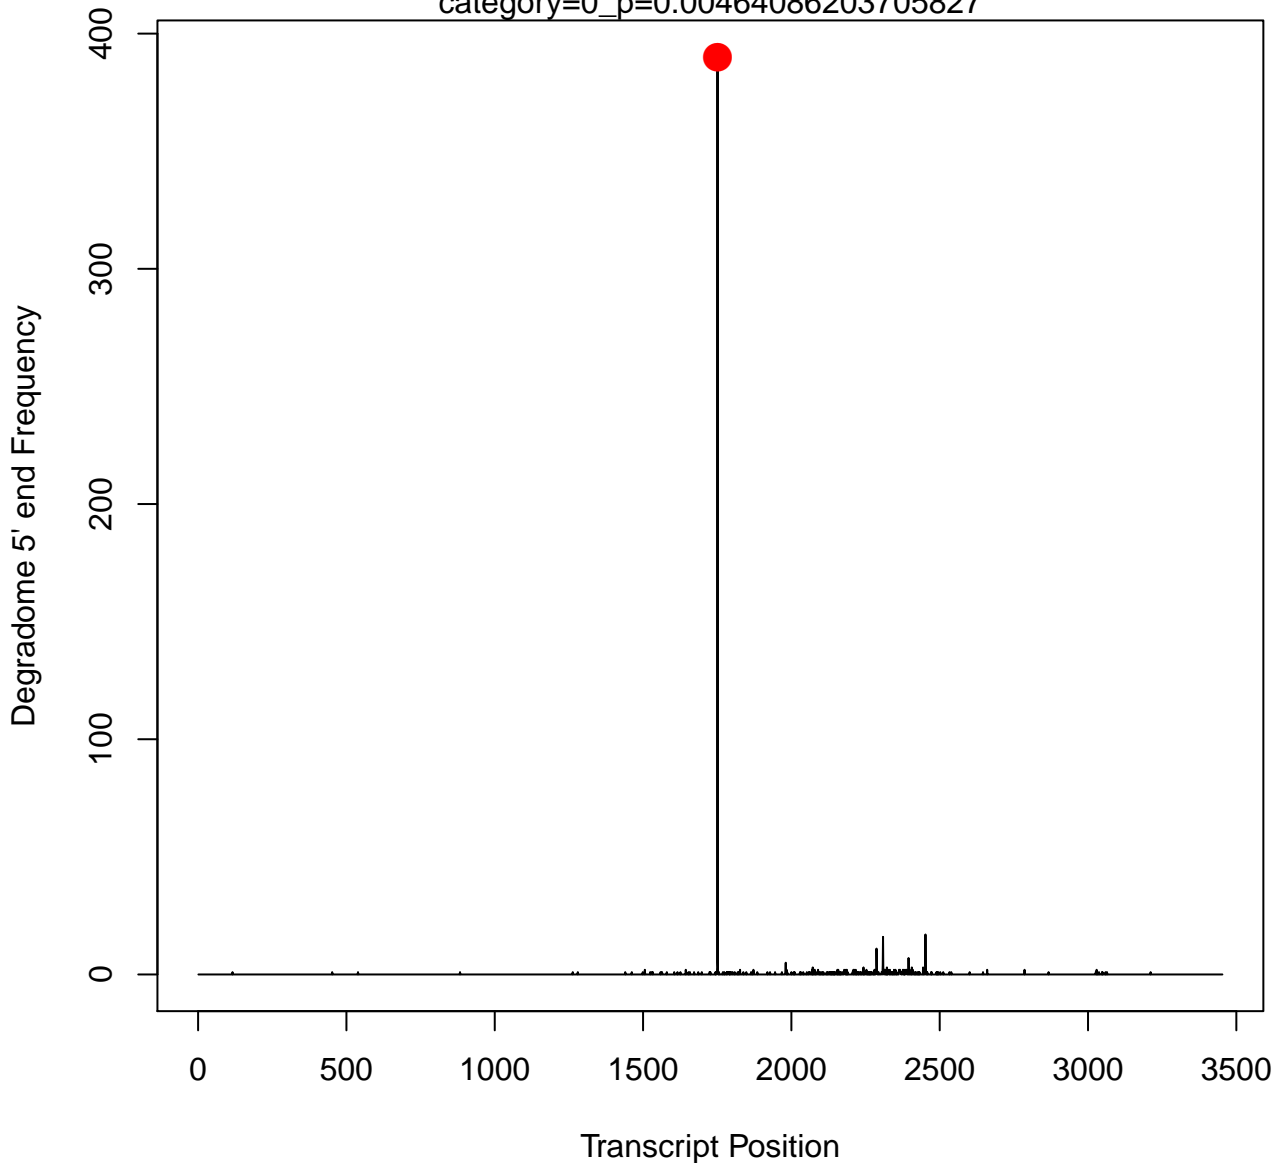

Supplement: s1 [file s1]

**T=Cluster-17867.0\_Q=novel\_47\_S=848**

category=0\_p=0.00109391048354923

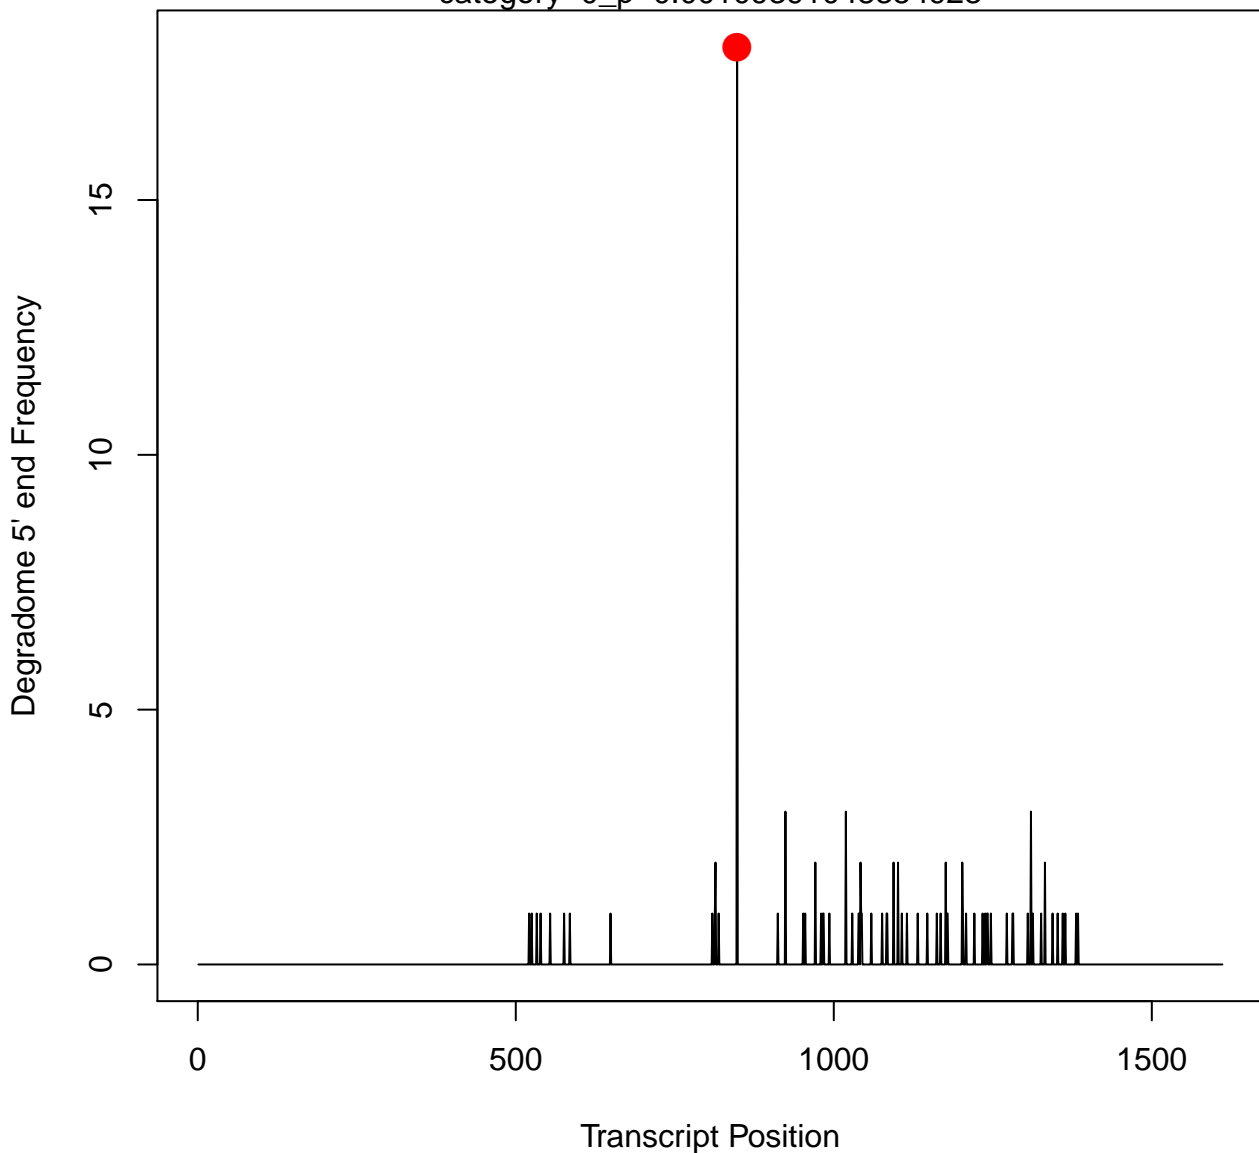

Supplement: s1 [file s1]

**T=Cluster-18410.64102\_Q=pma-miR159a\_S=569**

category=1\_p=0.00093543193942569

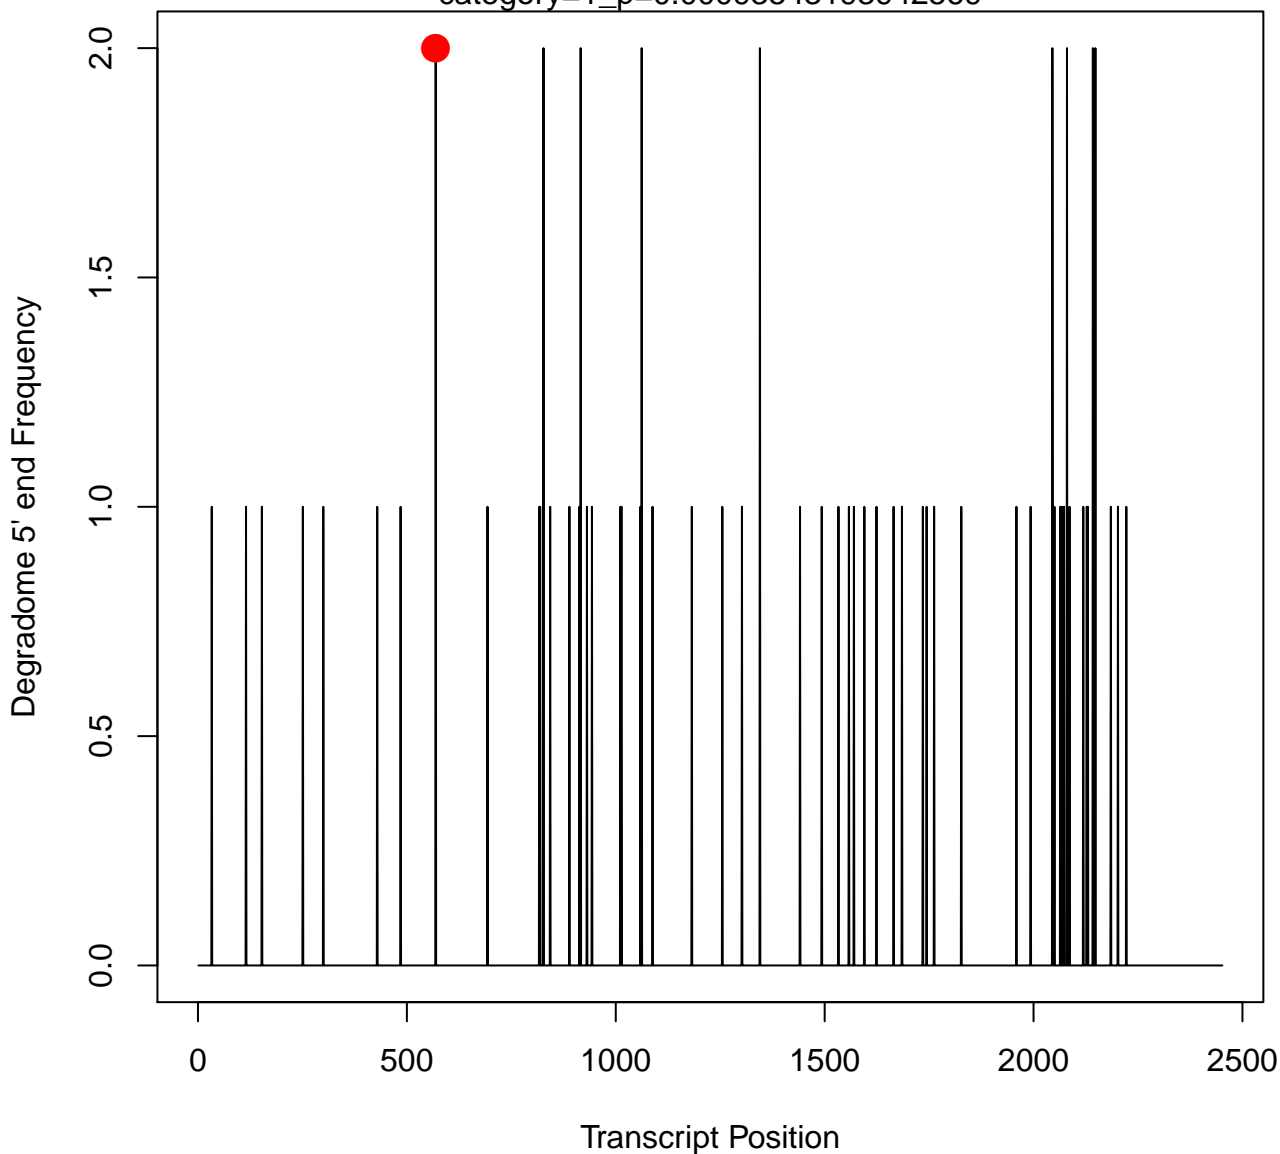

Supplement: s1 [file s1]

**T=Cluster-18410.13634\_Q=novel\_20\_S=1492**

category=0\_p=0.0224551117920671

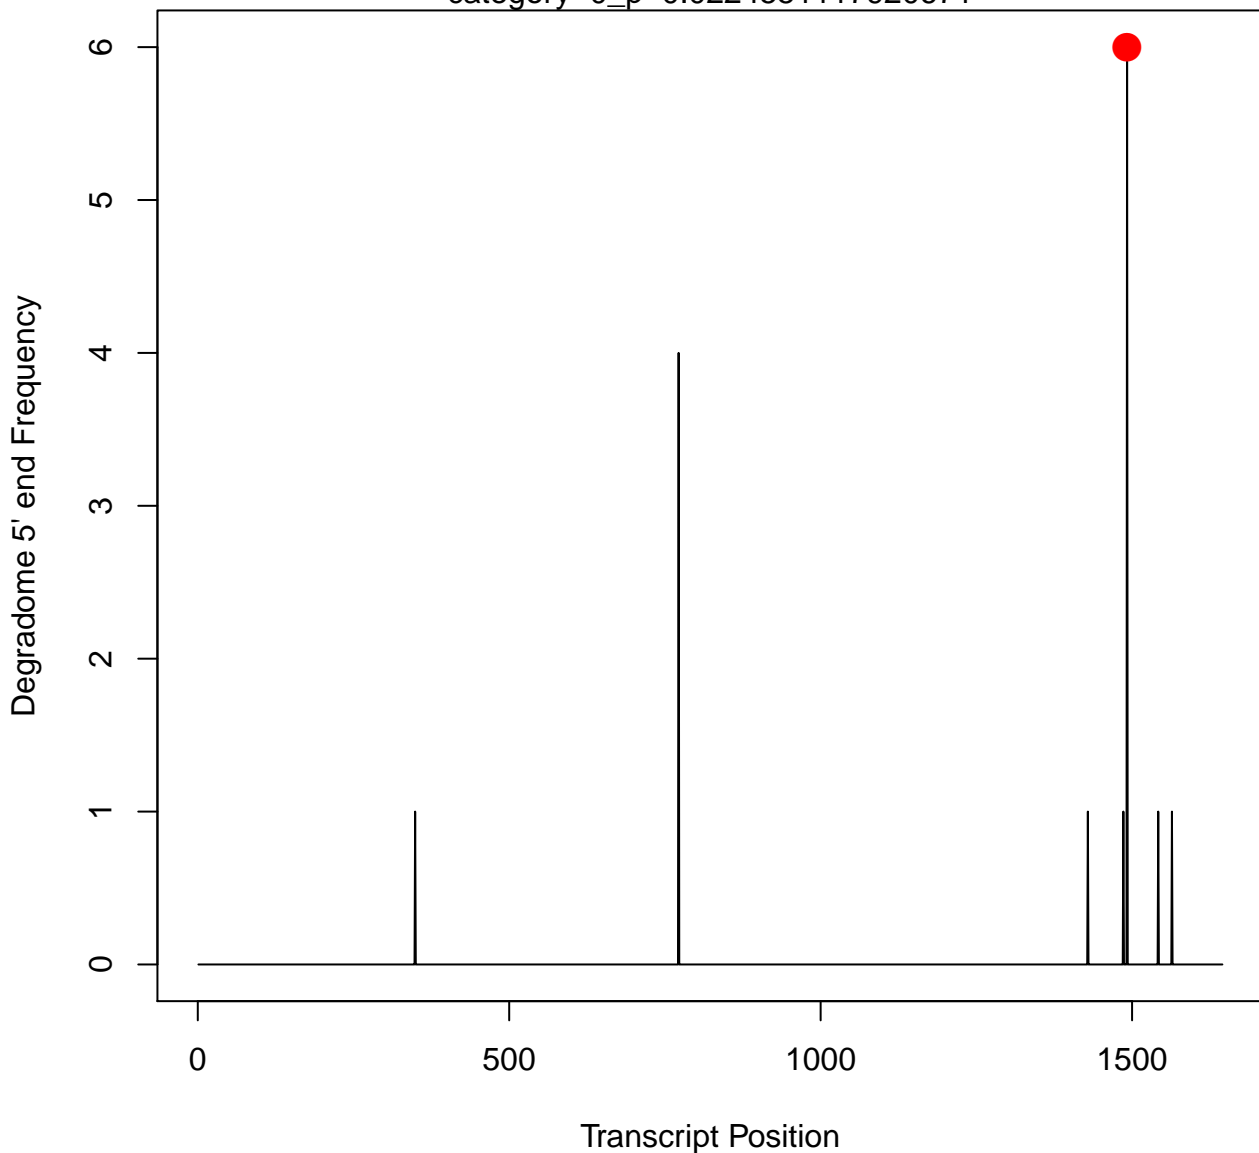

Supplement: s1 [file s1]

**T=Cluster-18410.59303\_Q=novel\_87\_S=817**

category=3\_p=0.052832191371651

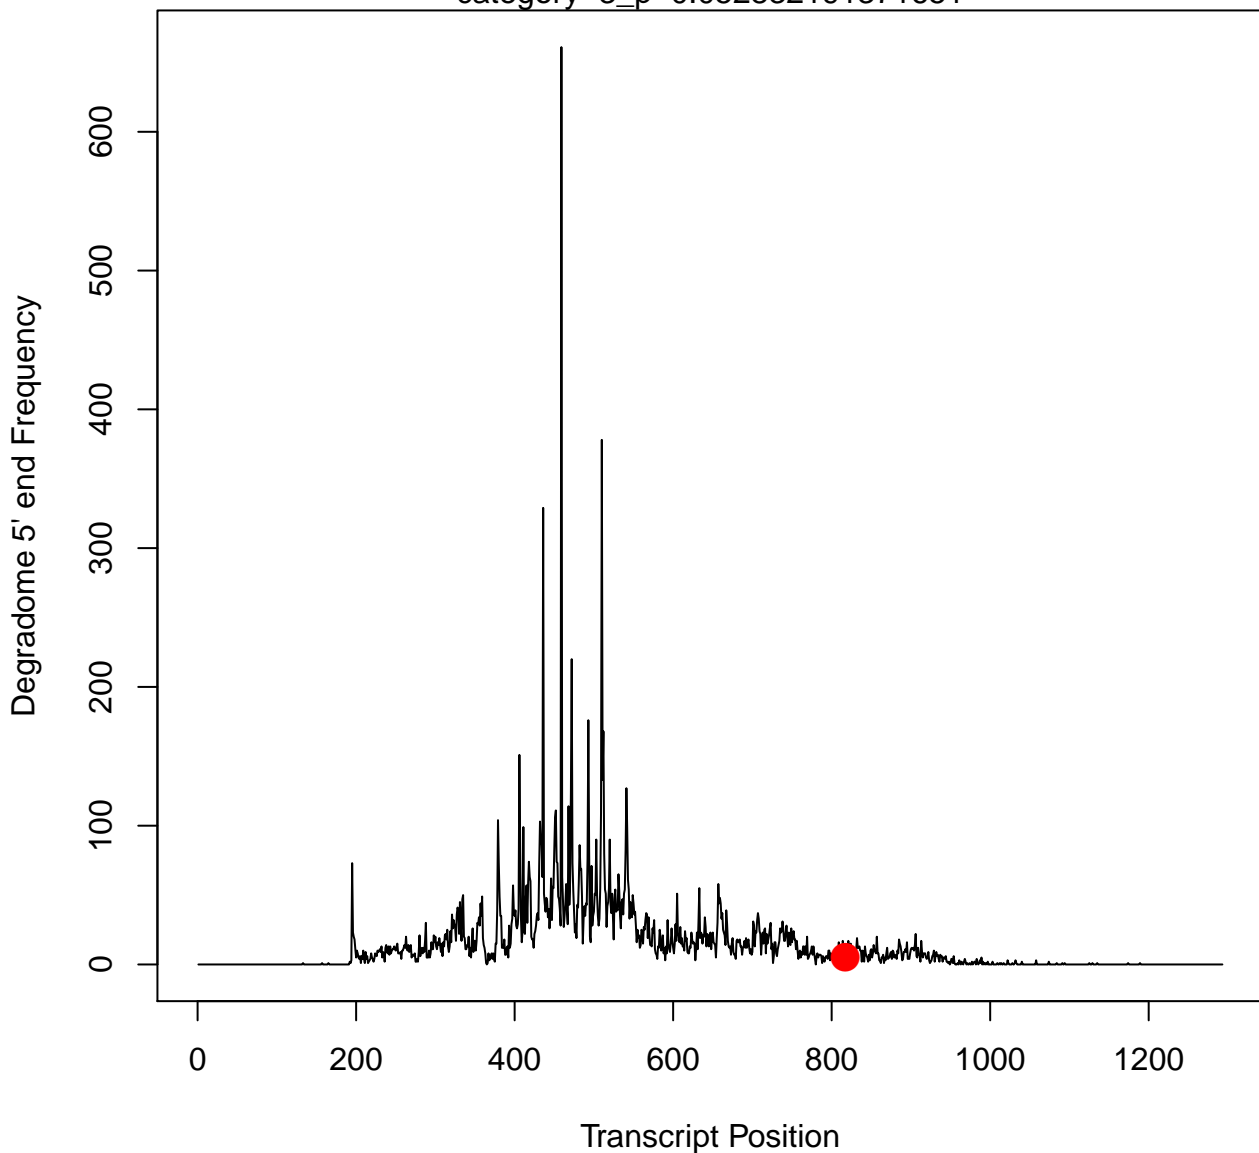

Supplement: s1 [file s1]

**T=Cluster-18410.45738\_Q=novel\_174\_S=699**

category=0\_p=0.0394249991267182

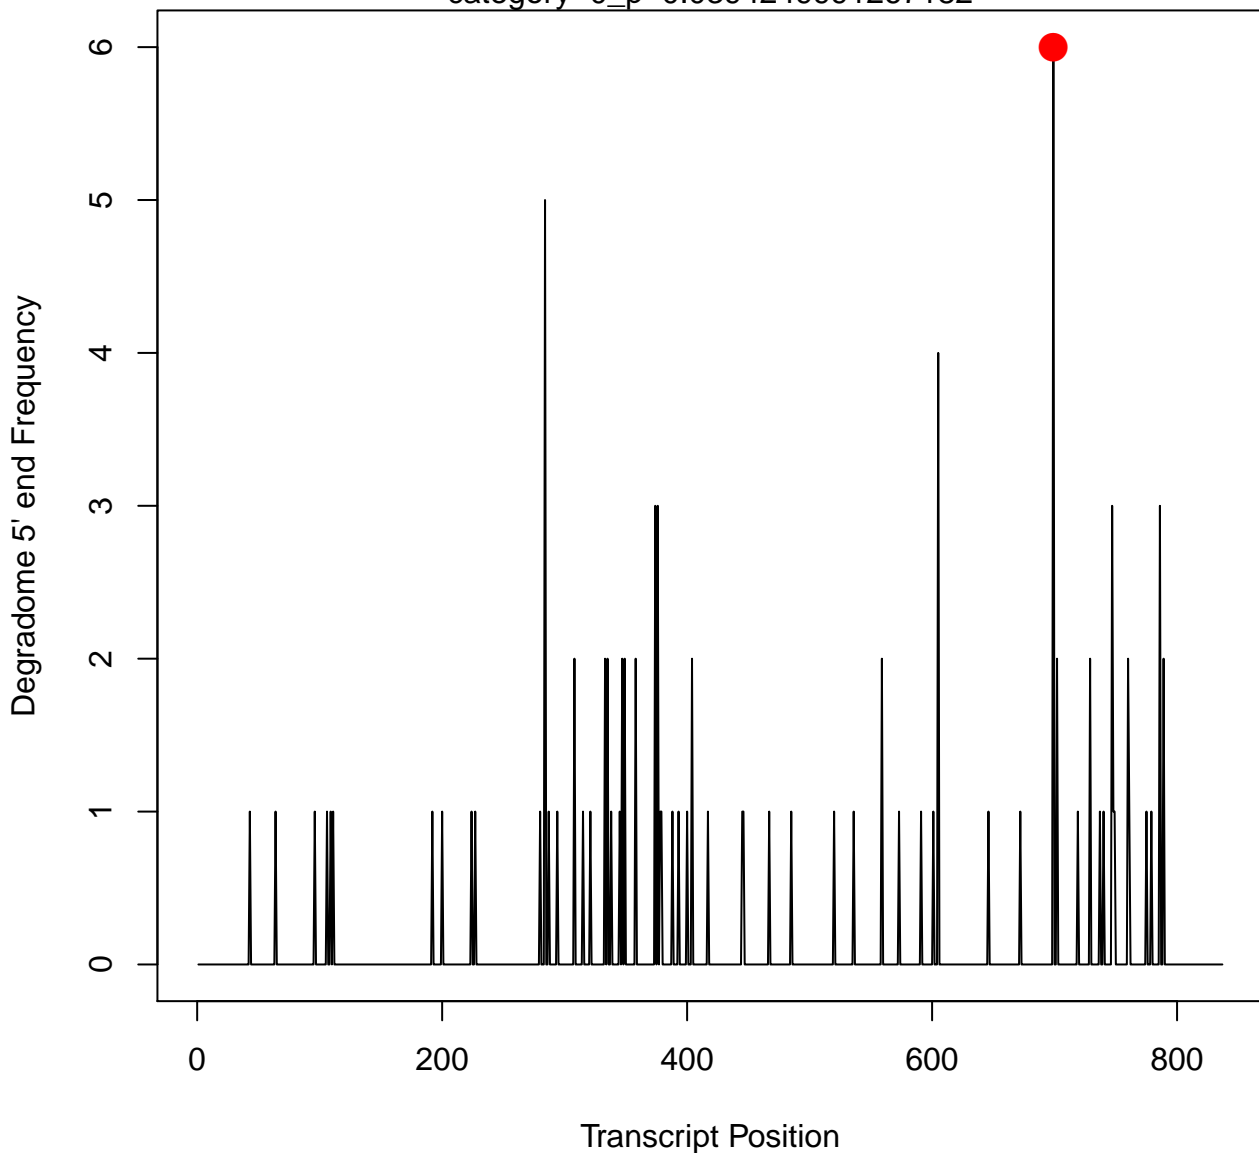

Supplement: s1 [file s1]

**T=Cluster-18410.37093\_Q=novel\_82\_S=583**

category=1\_p=0.0222105060686348

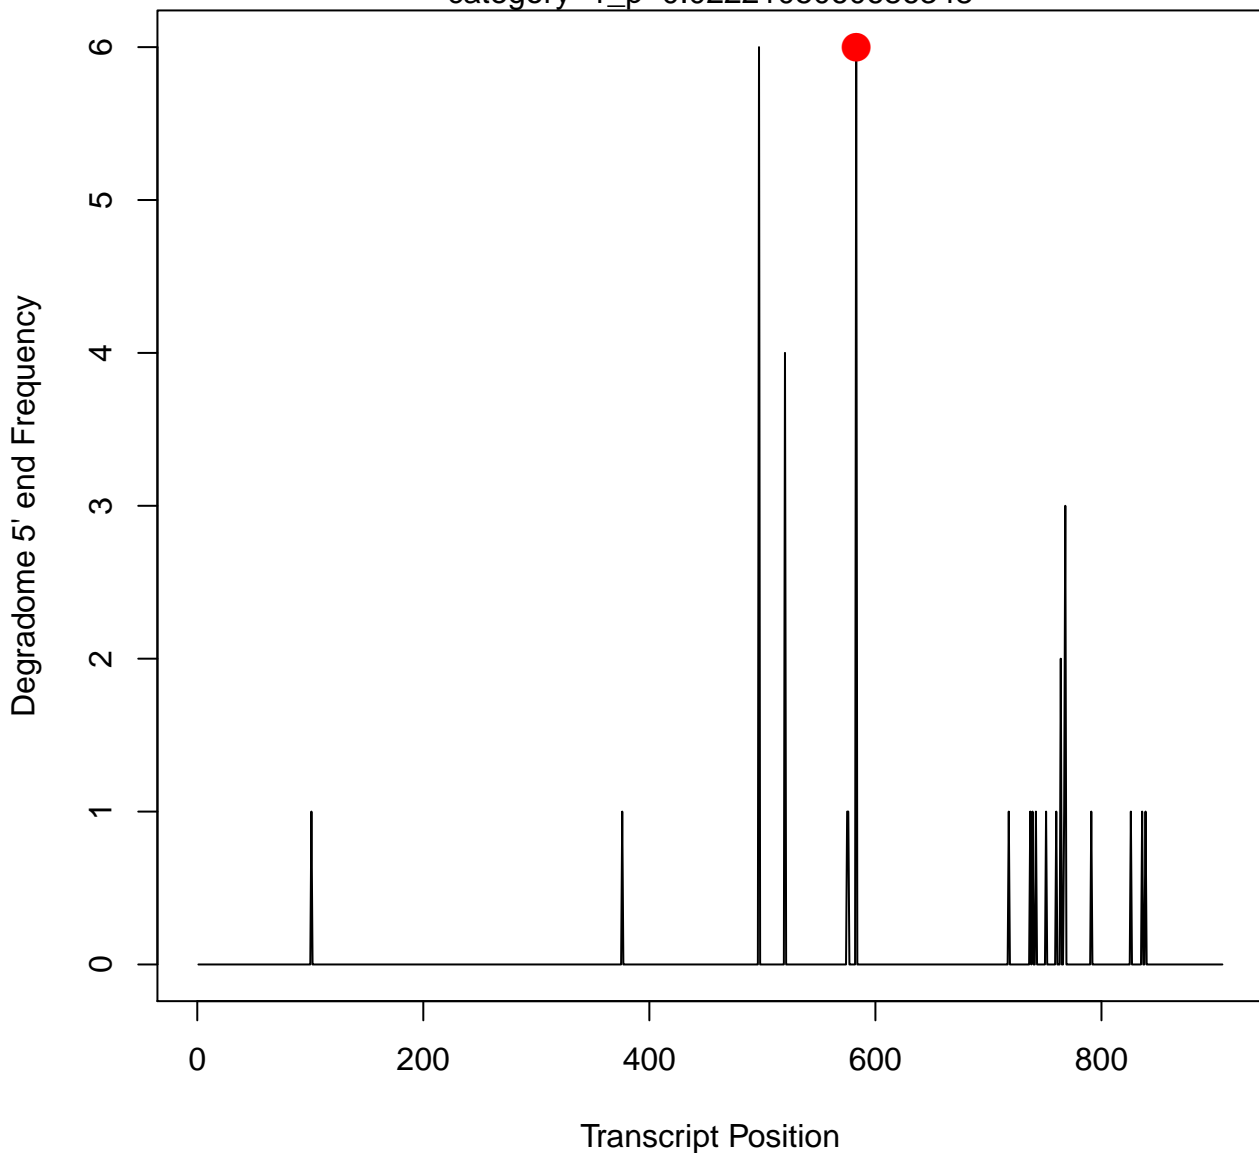

Supplement: s1 [file s1]

**T=Cluster-18410.116611\_Q=novel\_122\_S=754**

category=1\_p=0.0237344565580955

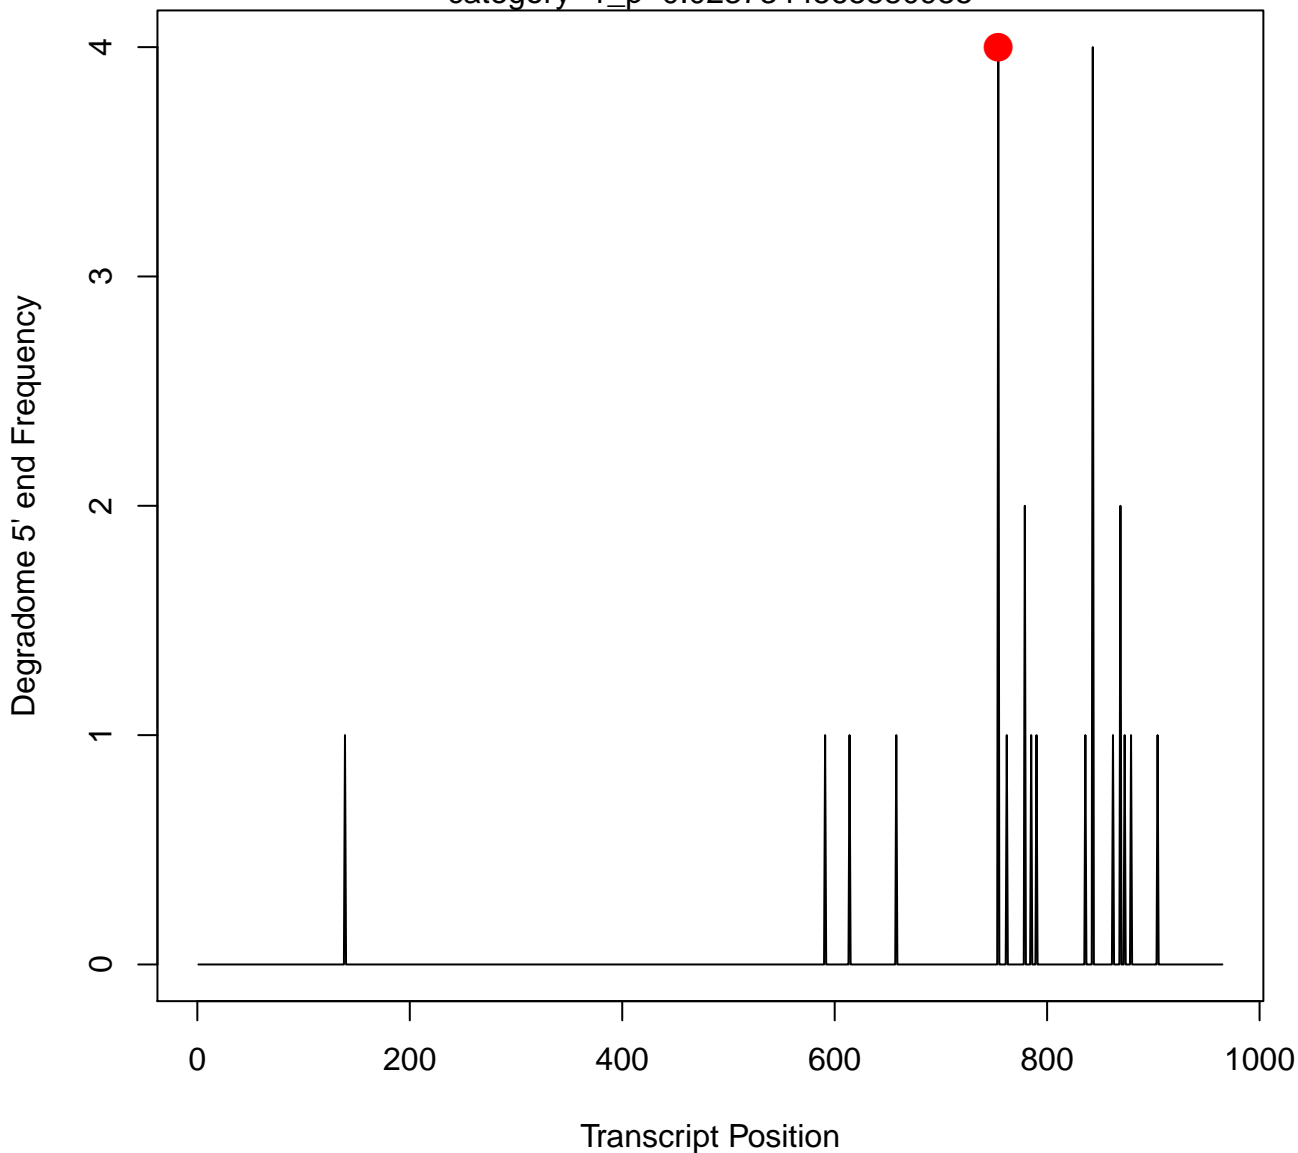

Supplement: s1 [file s1]

**T=Cluster-18410.85404\_Q=novel\_168\_S=672**

category=0\_p=0.0203129041554919

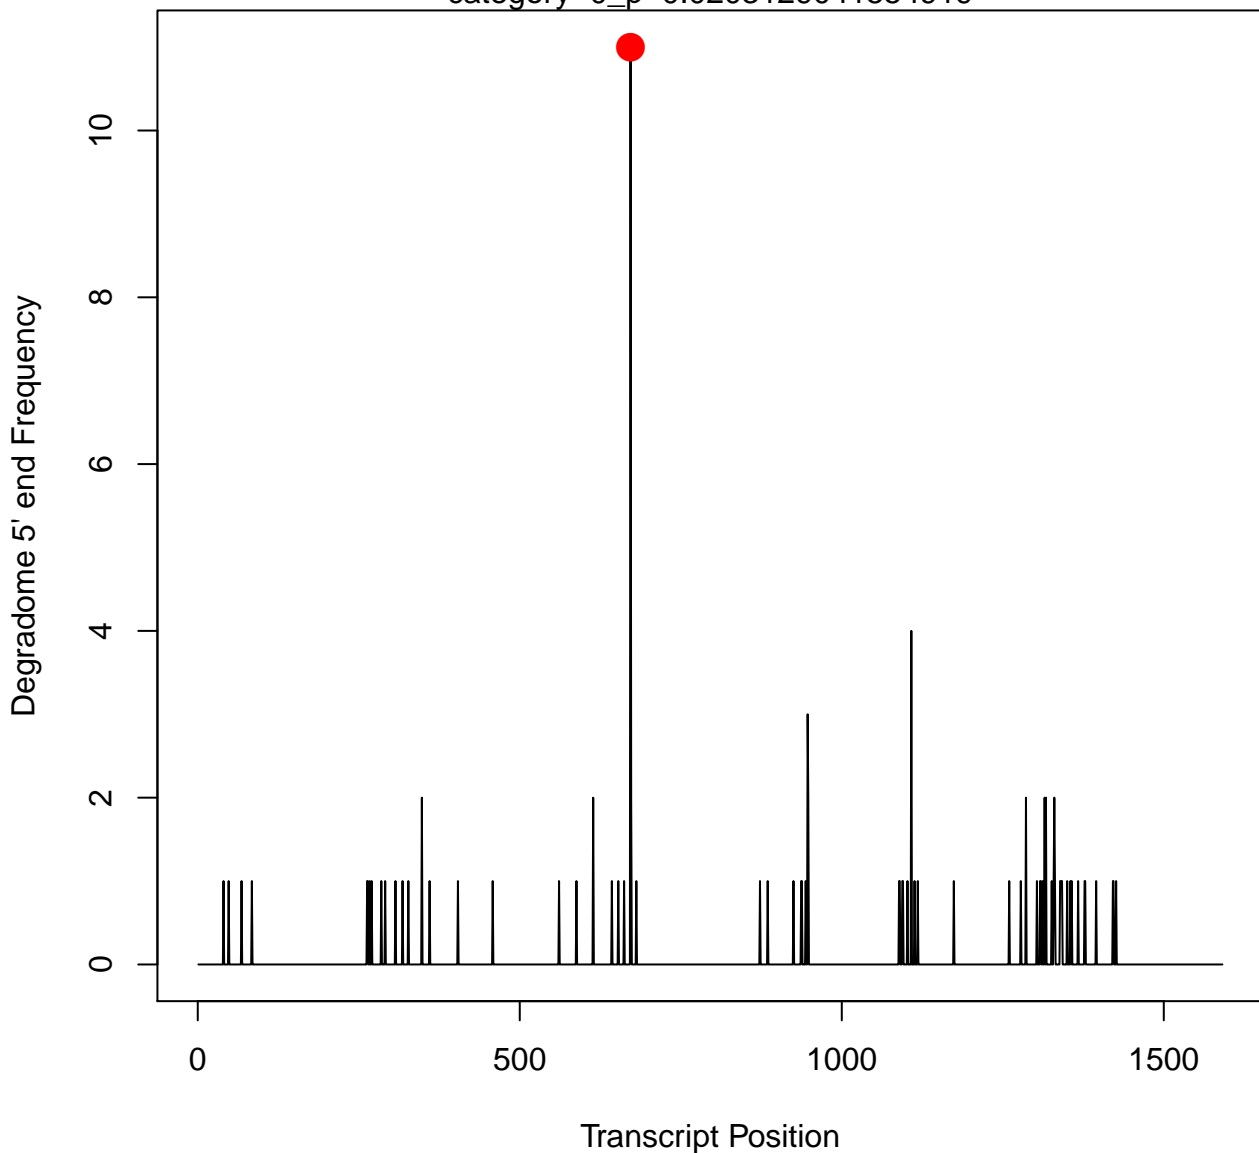

Supplement: s1 [file s1]

**T=Cluster-18410.57677\_Q=novel\_47\_S=587**

category=0\_p=0.00436846732795781

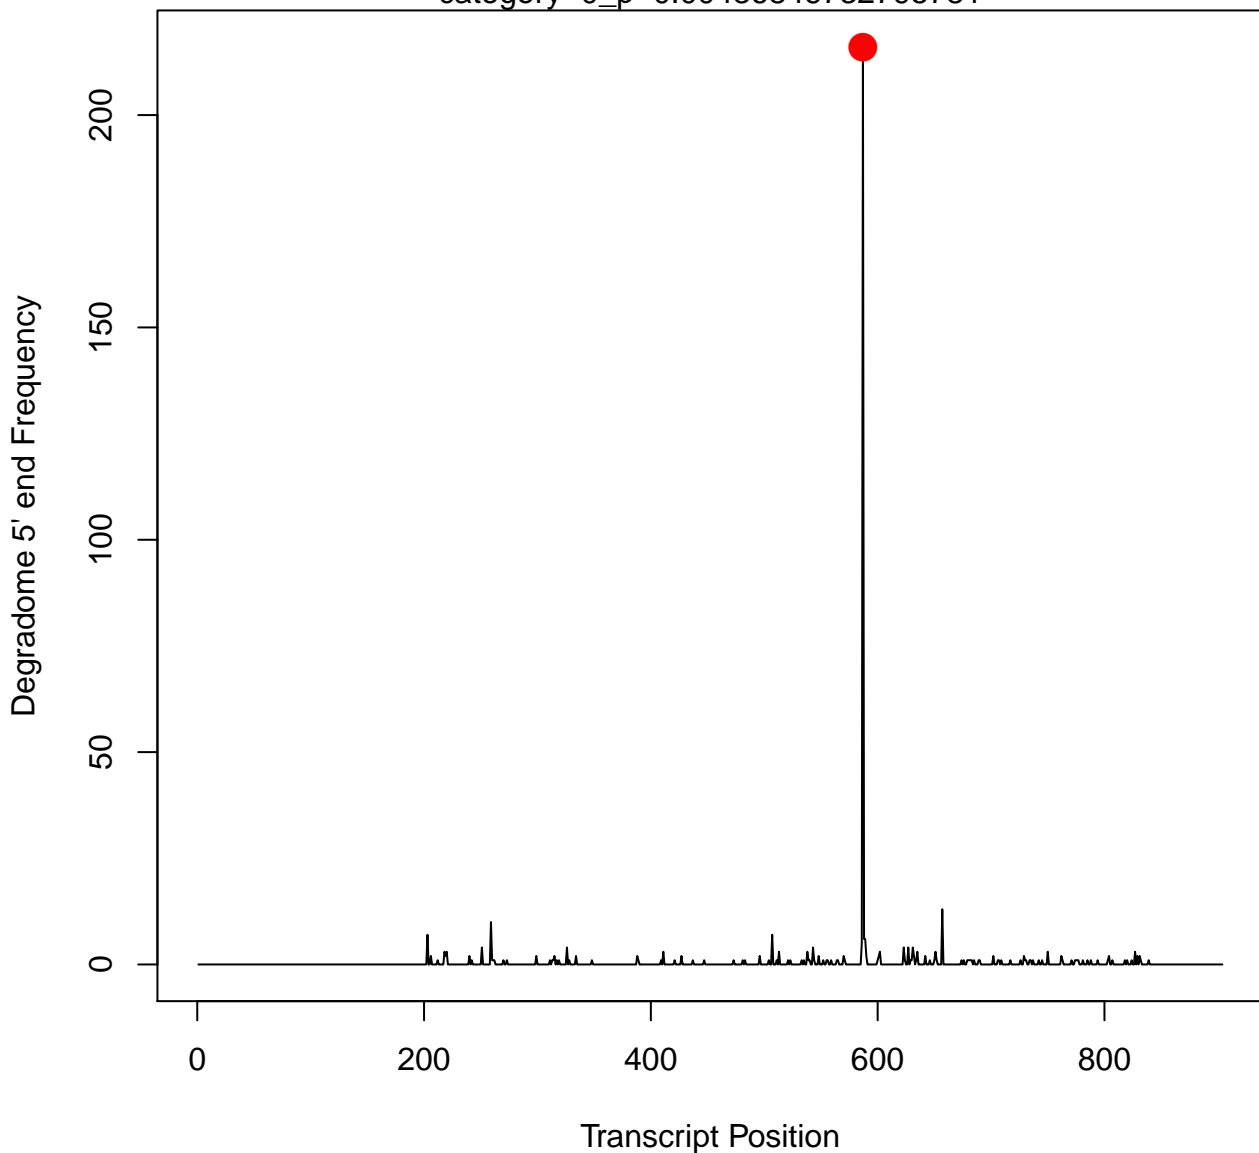

Supplement: s1 [file s1]

**T=Cluster-18410.111684\_Q=novel\_74\_S=583**

category=1\_p=0.0111676107998053

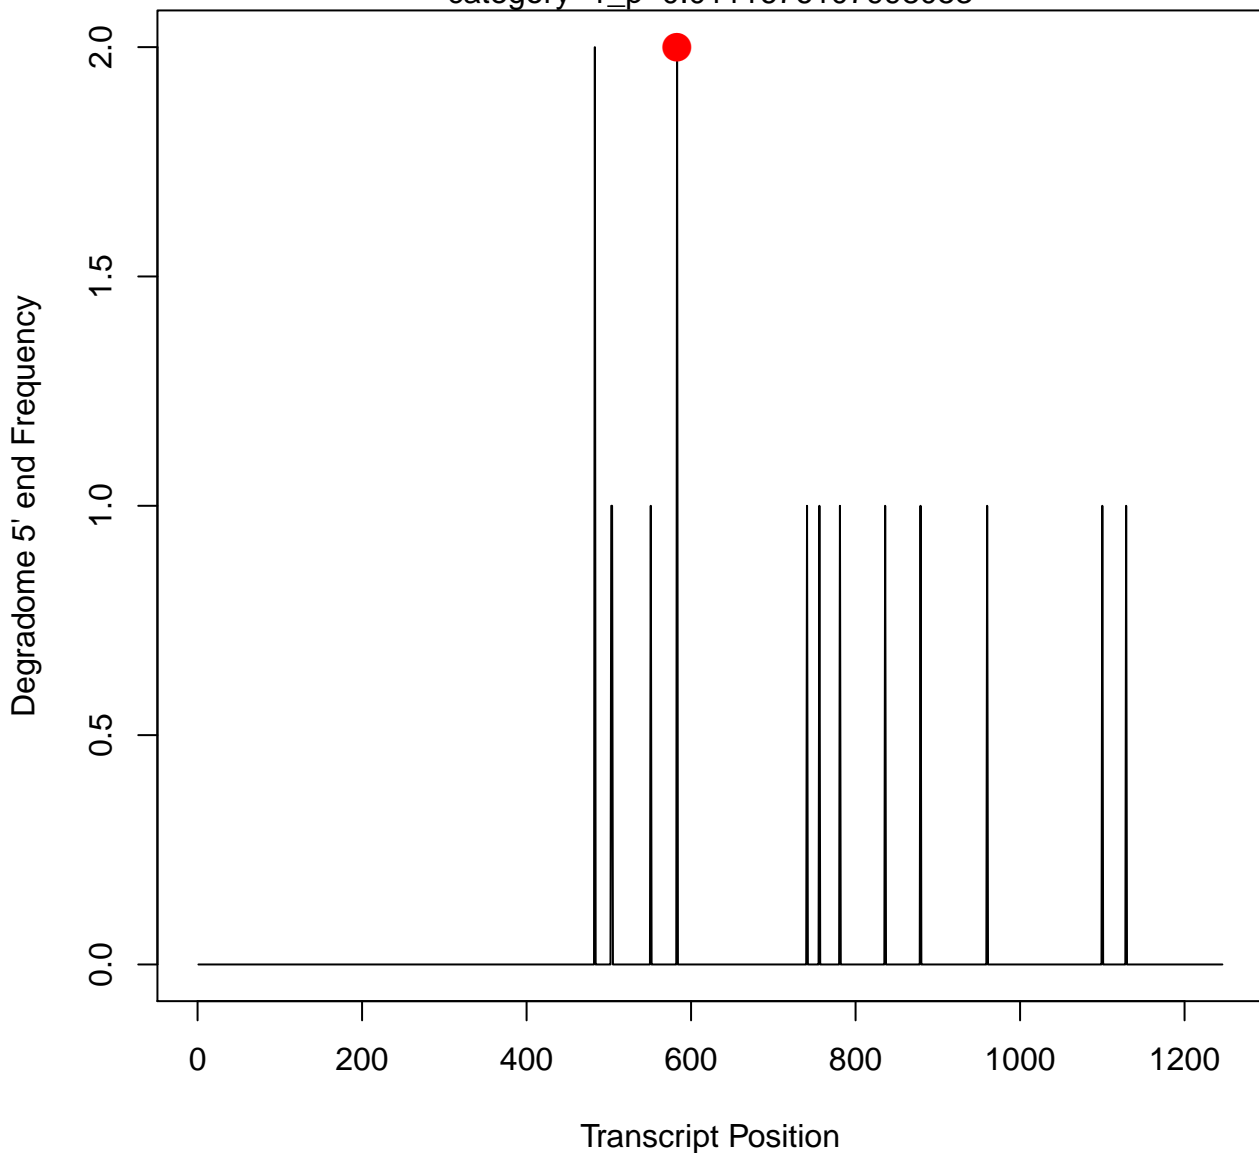

Supplement: s1 [file s1]

**T=Cluster-21786.1\_Q=pma-miR482a\_S=180**

category=0\_p=0.00790379146763054

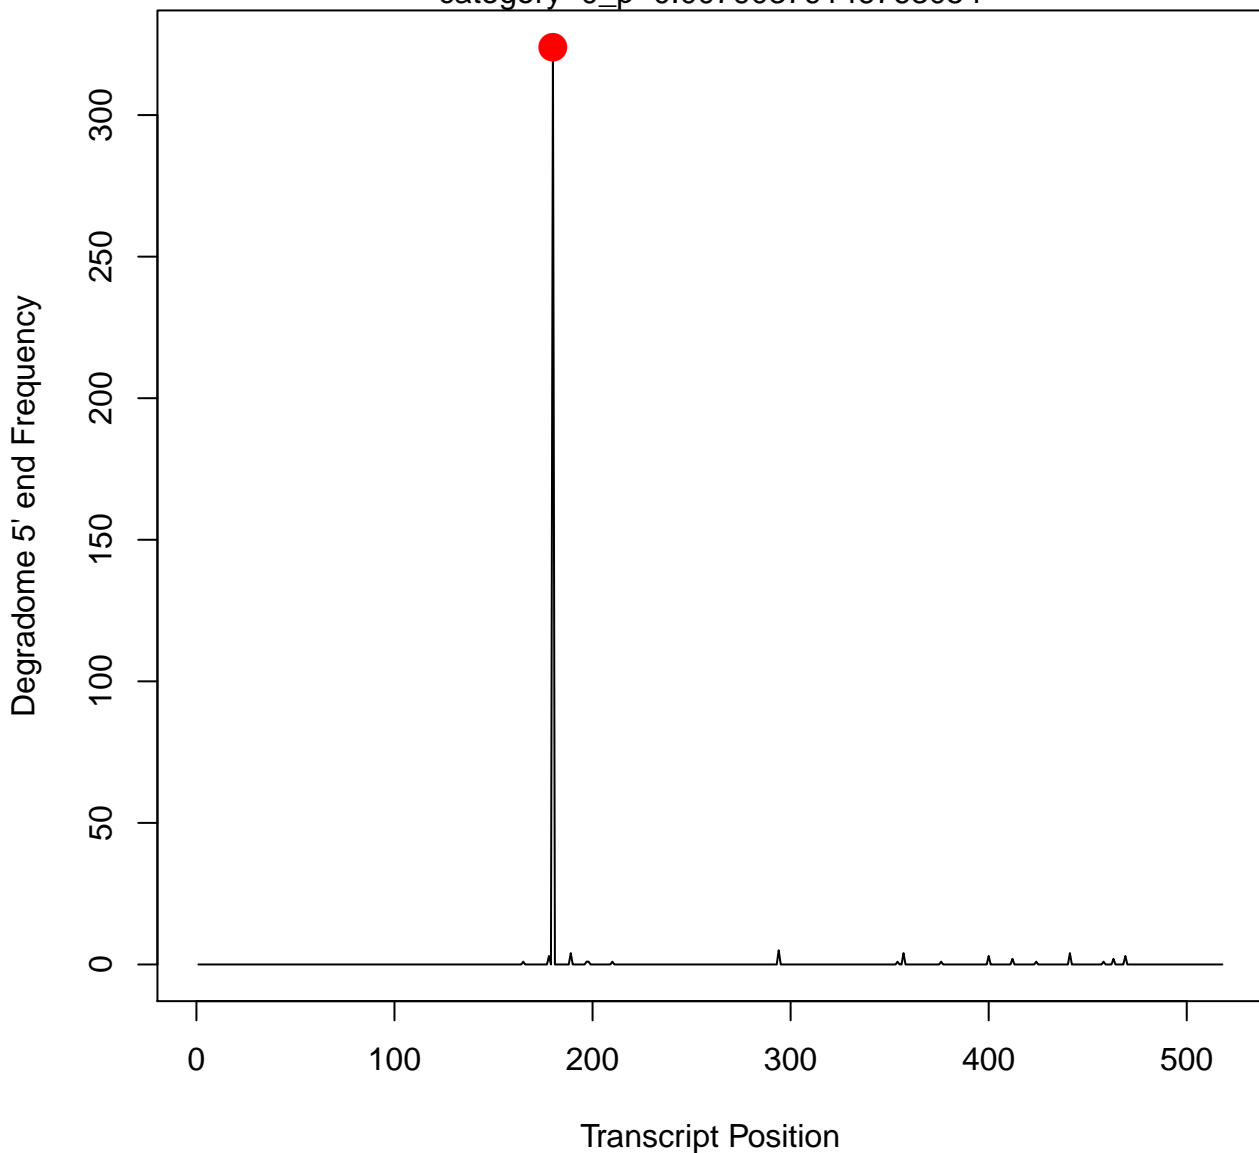

Supplement: s1 [file s1]

**T=Cluster-18410.65104\_Q=novel\_42\_S=268**

category=0\_p=0.00572969583297245

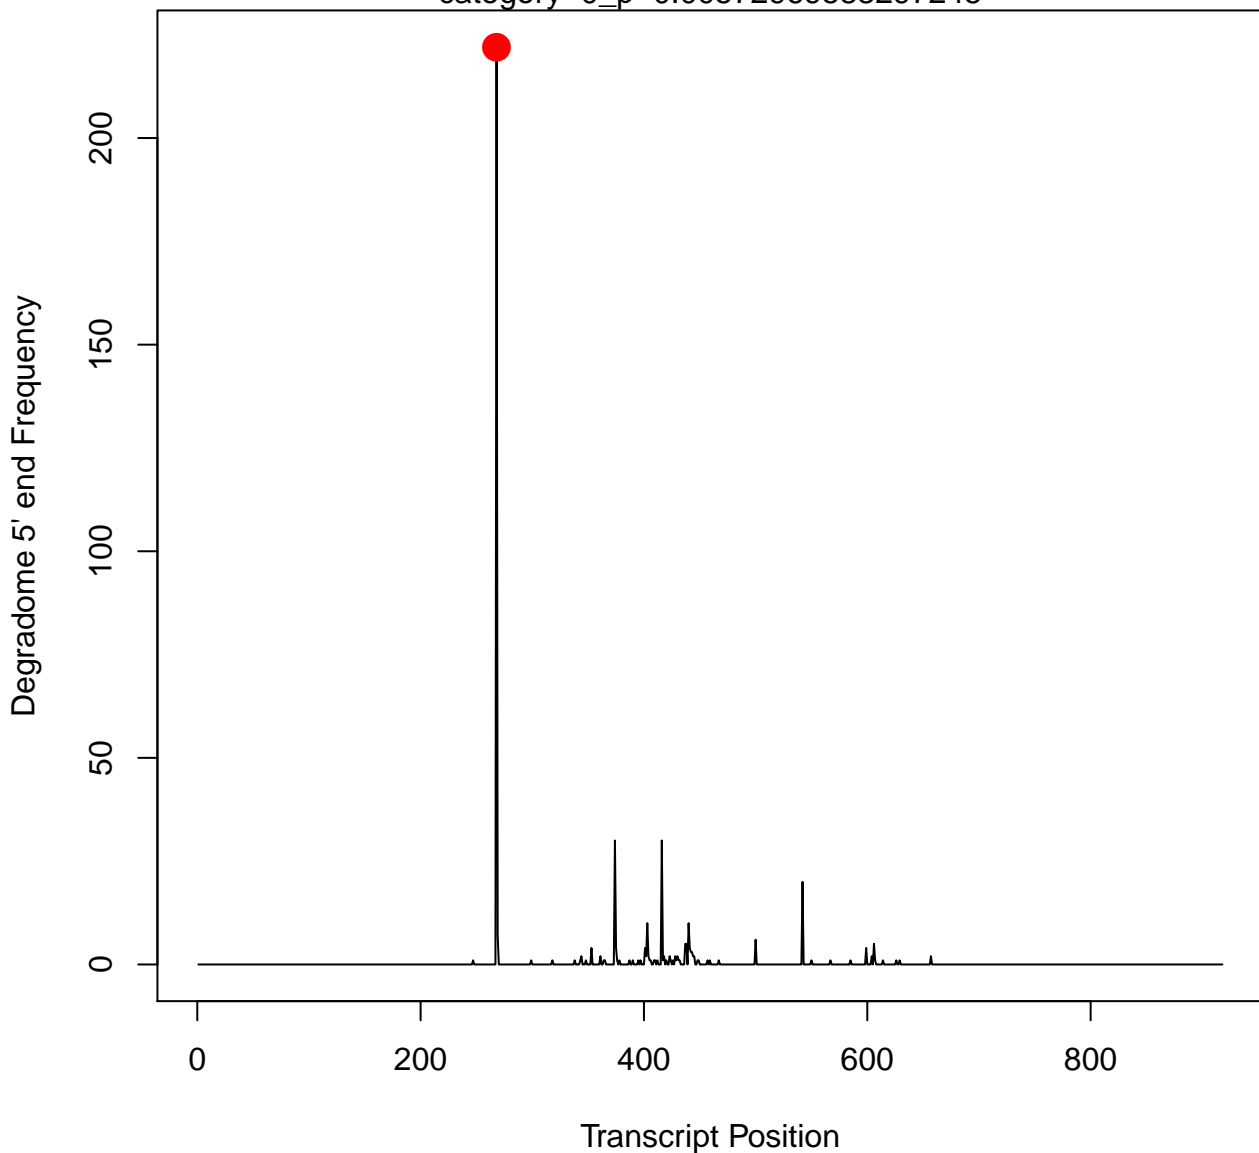

Supplement: s1 [file s1]

**T=Cluster-18410.8189\_Q=novel\_101\_S=232**

category=2\_p=0.0780956144108357

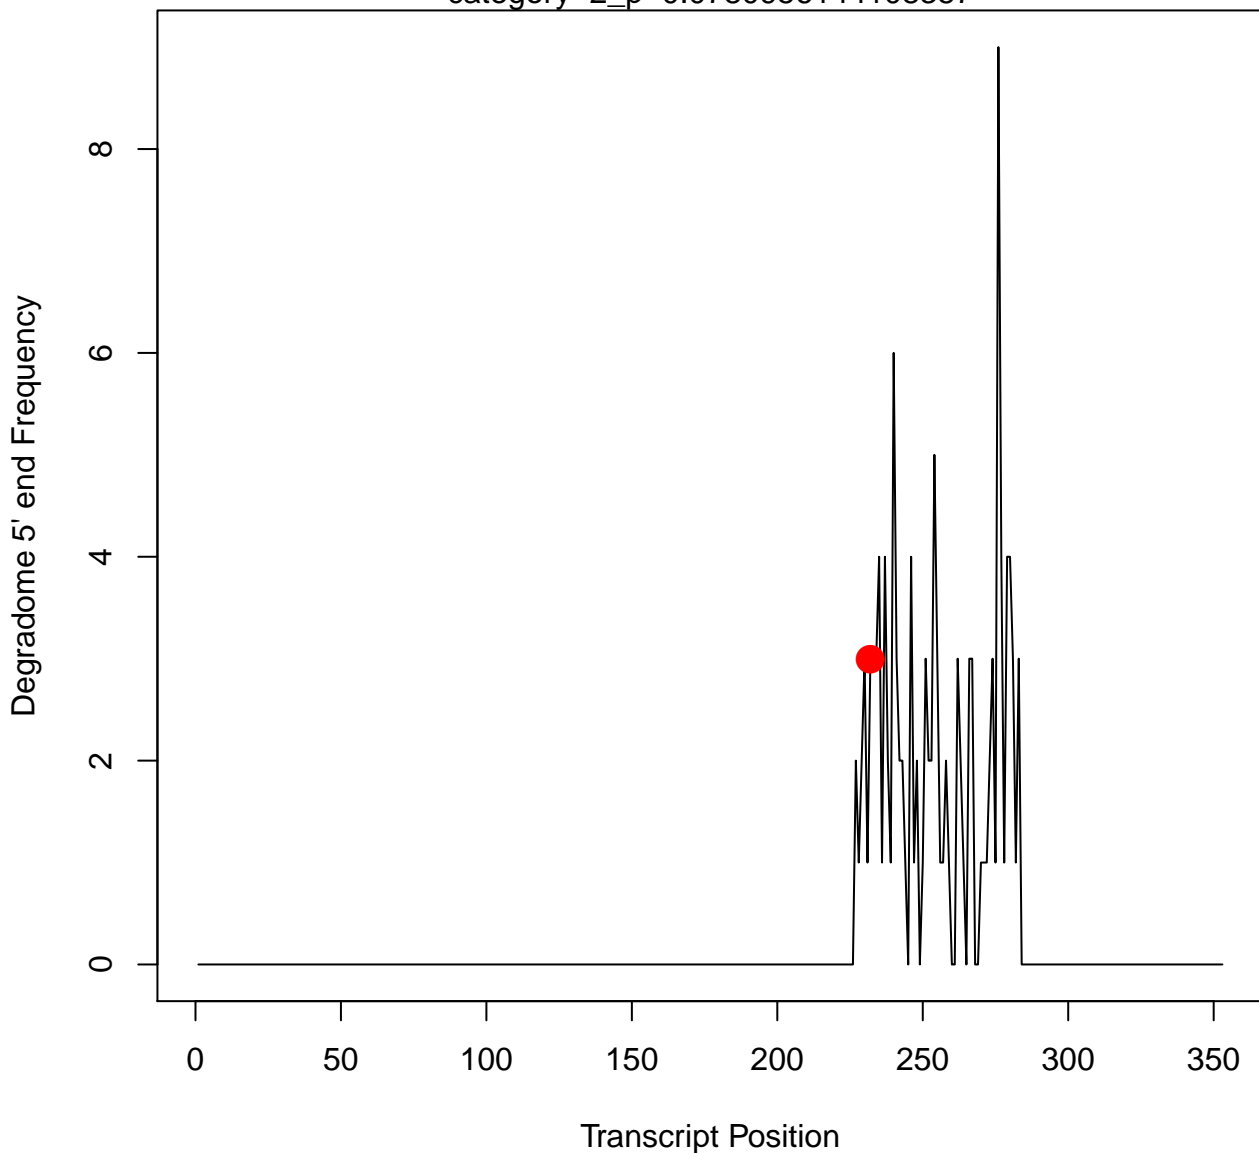

Supplement: s1 [file s1]

**T=Cluster-18410.85743\_Q=16\_S=1510**

category=0\_p=0.000547104903662499

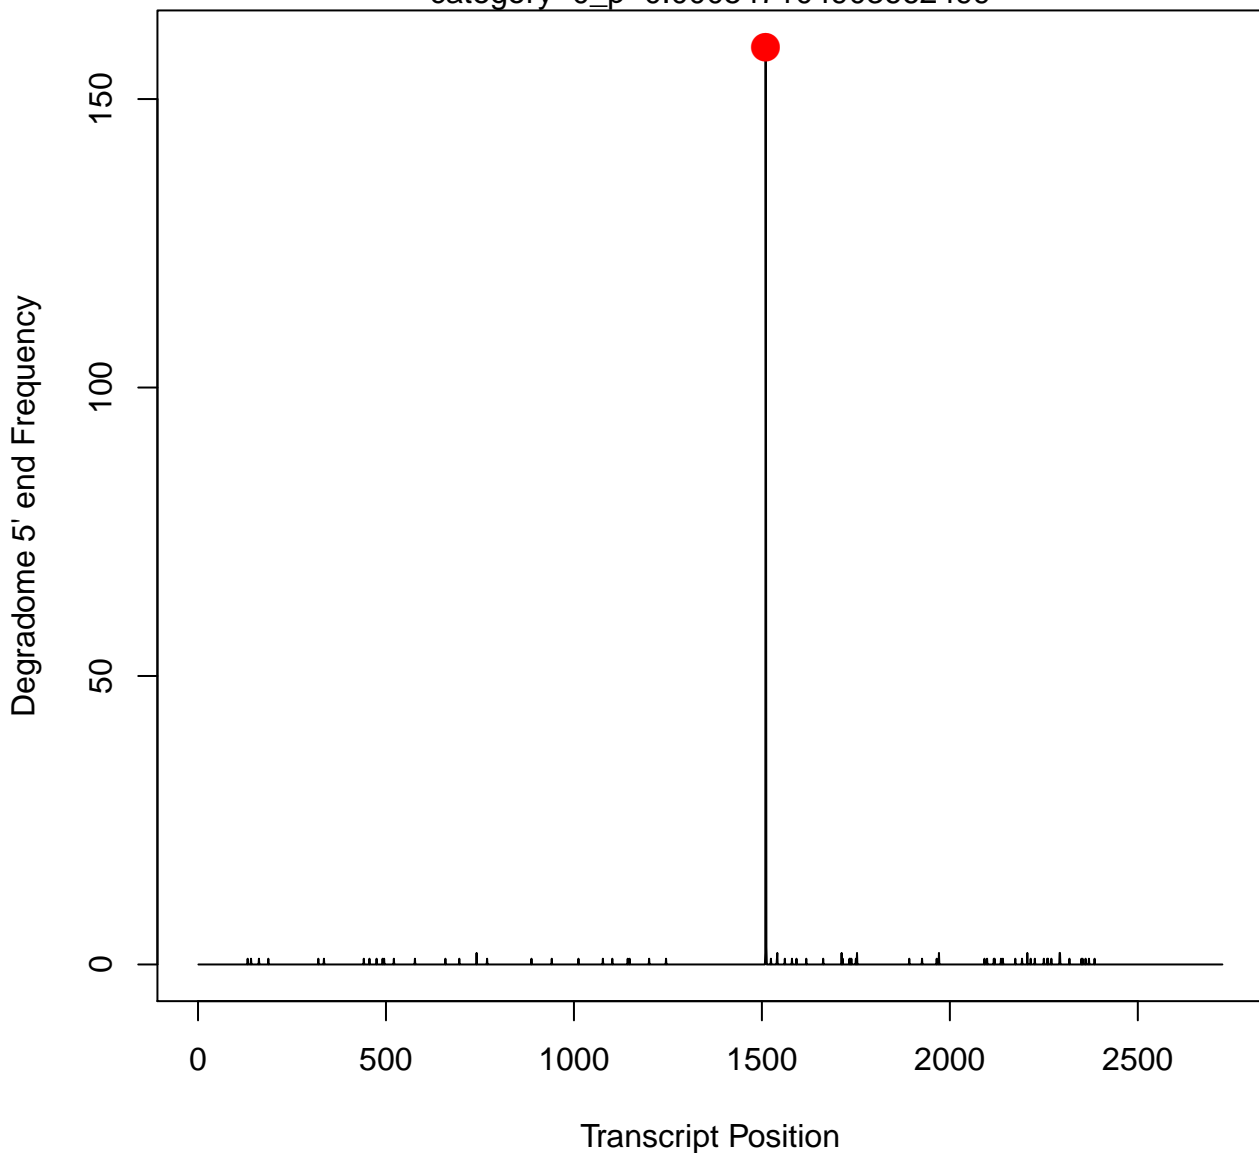

Supplement: s1 [file s1]

**T=Cluster-18410.112954\_Q=novel\_20\_S=160**

category=0\_p=0.00980222508390338

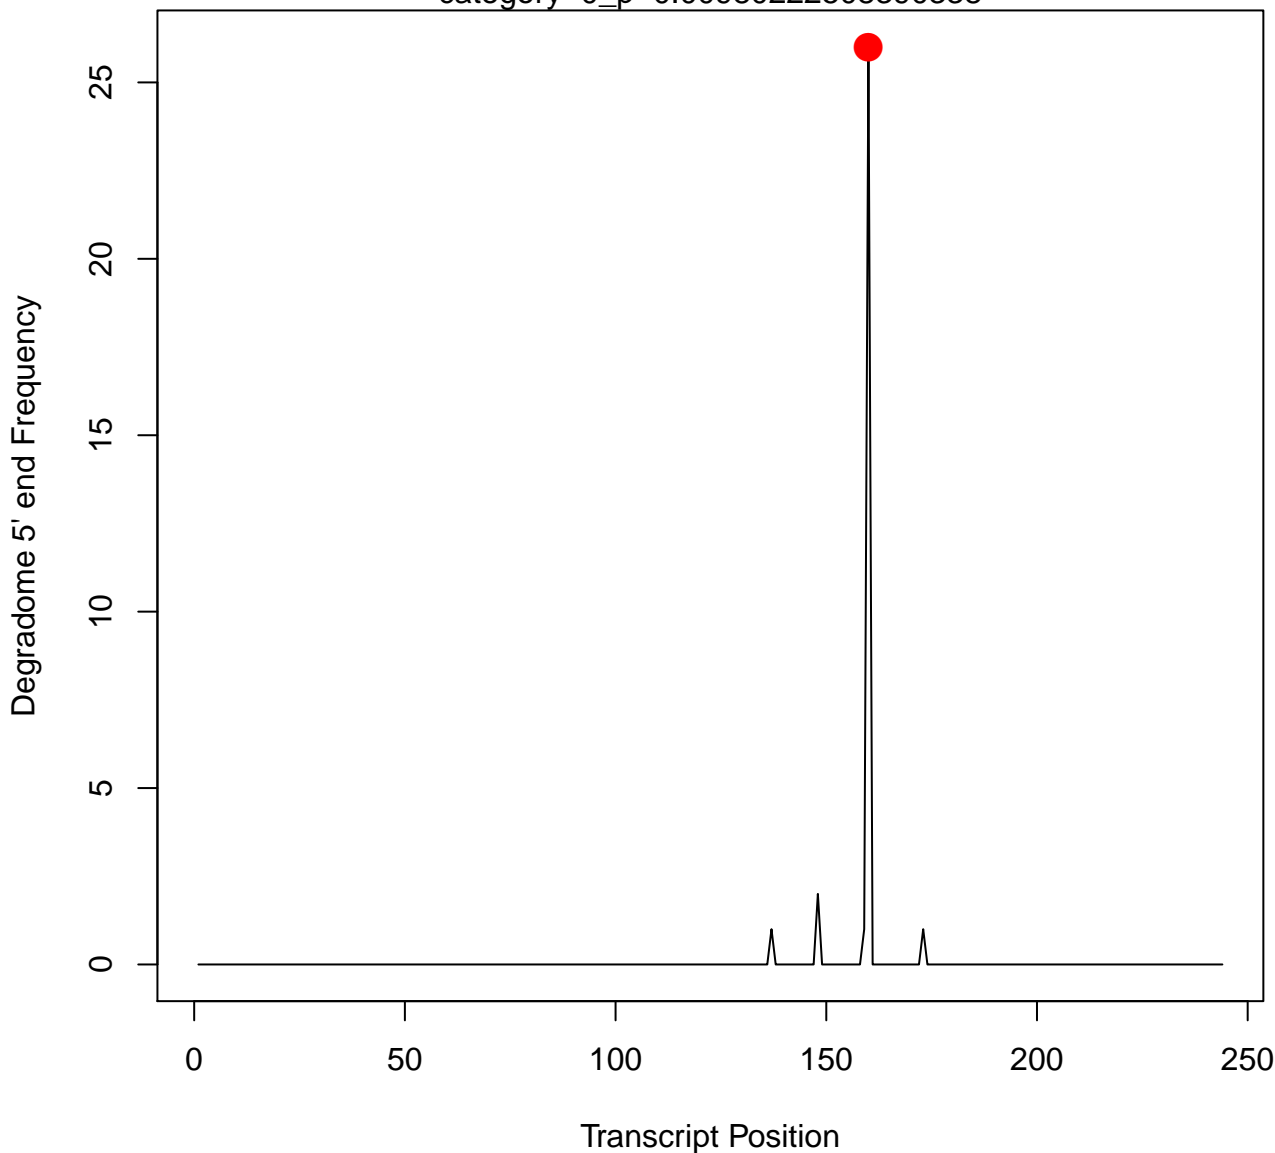

Supplement: s1 [file s1]

**T=Cluster-18410.67770\_Q=novel\_163\_S=590**

category=3\_p=0.0579593960730893

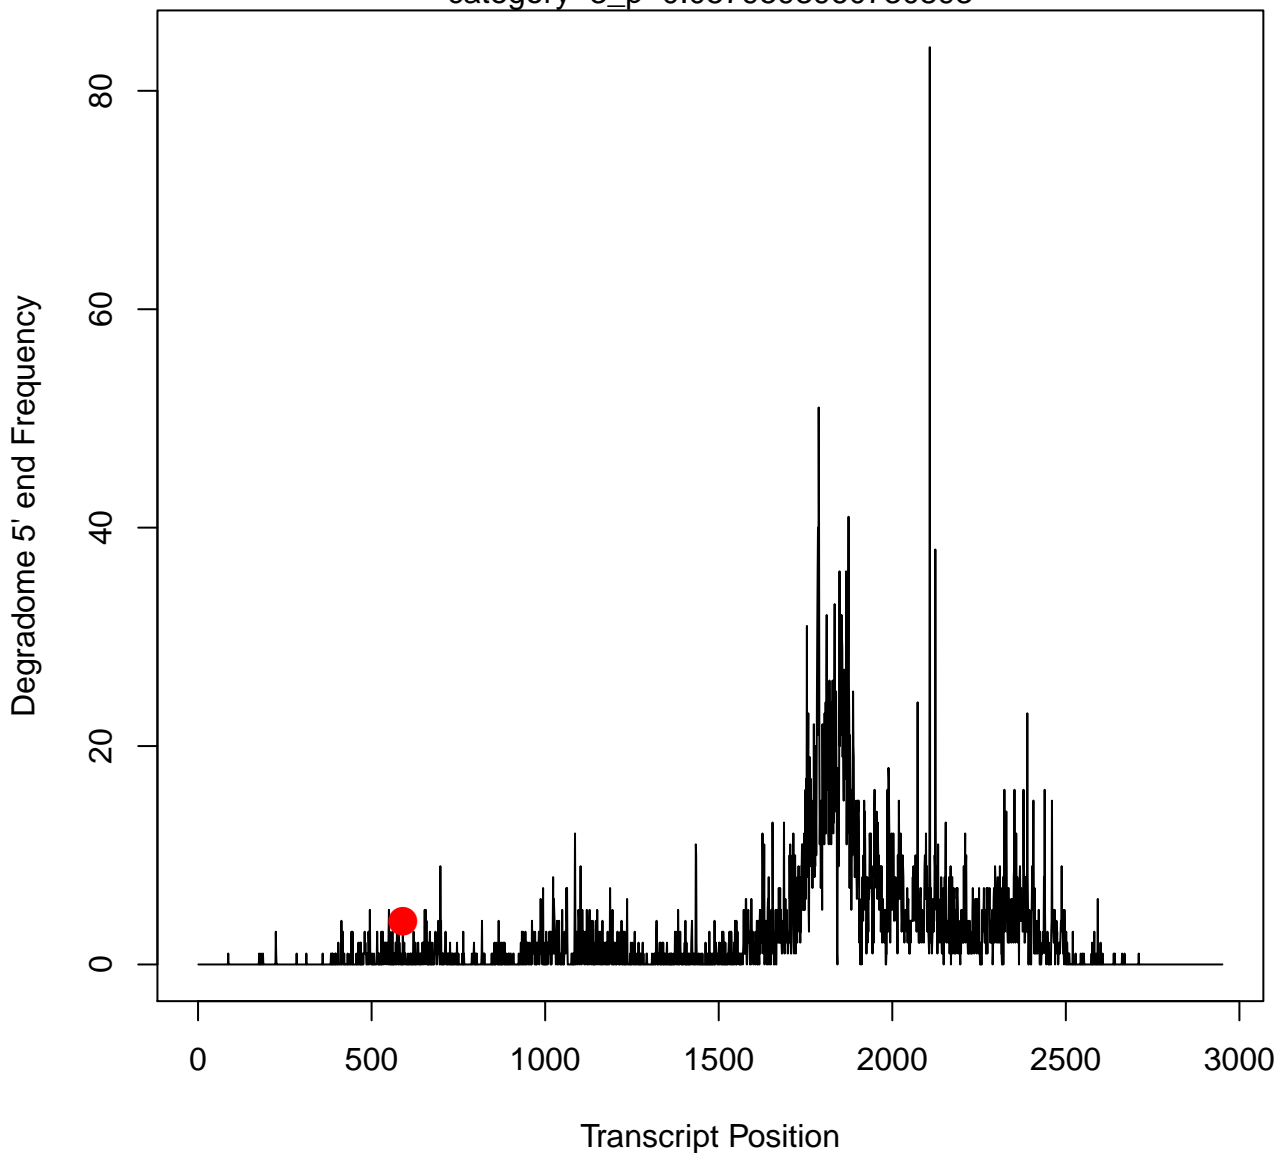

Supplement: s1 [file s1]

**T=Cluster-18410.73418\_Q=novel\_92\_S=1772**

category=0\_p=0.005185427902343

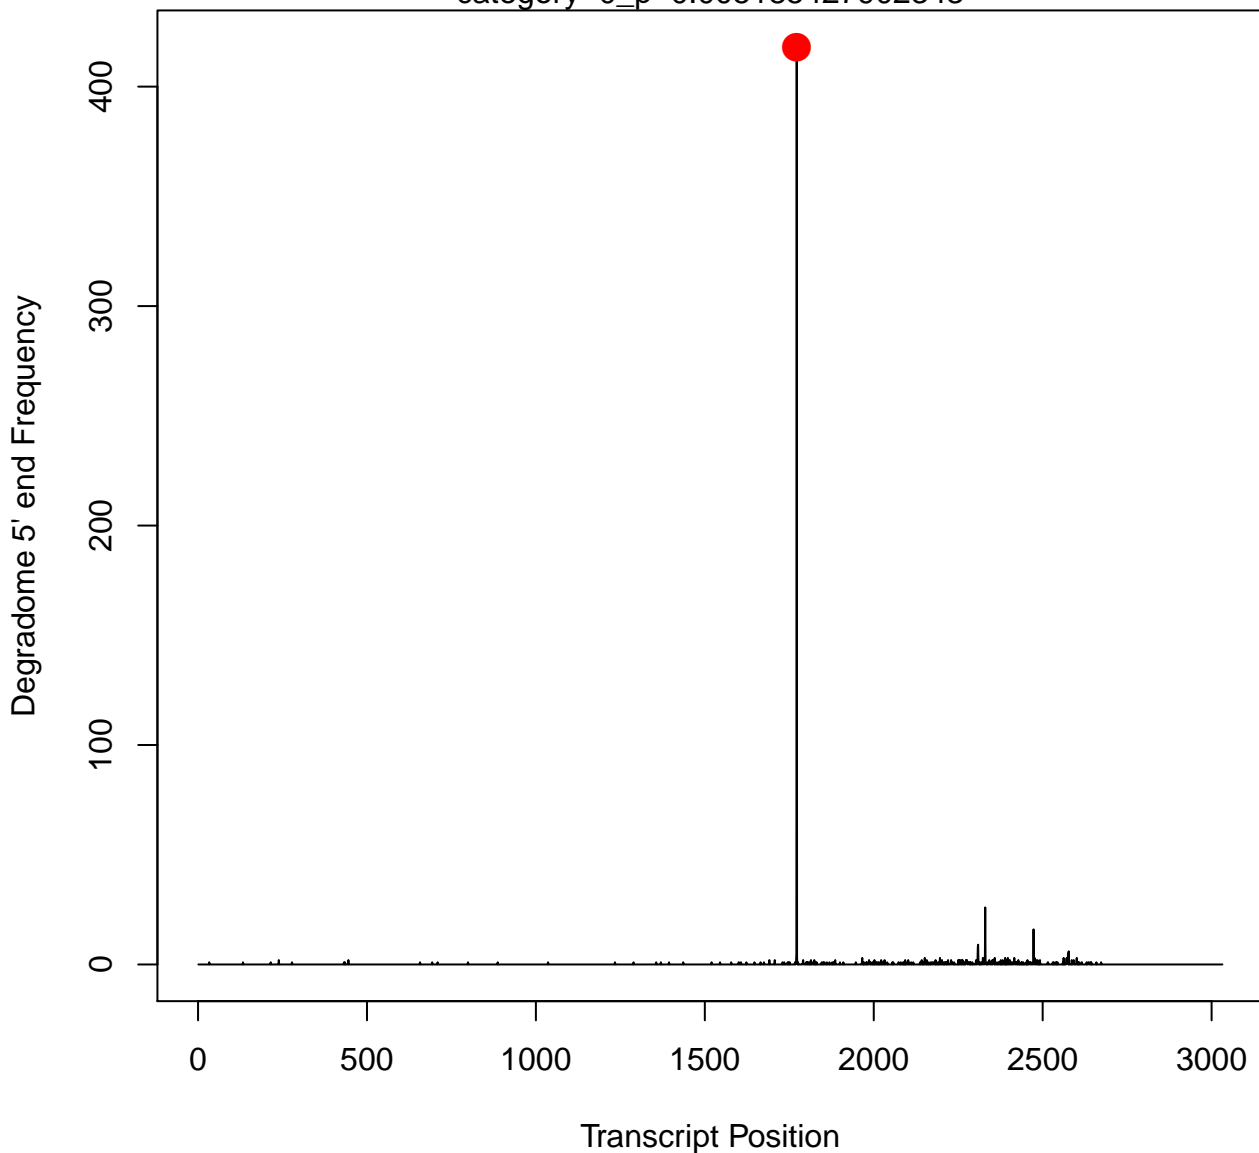

Supplement: s1 [file s1]

**T=Cluster-18410.73101\_Q=novel\_64\_S=327**

category=0\_p=0.00191355797950399

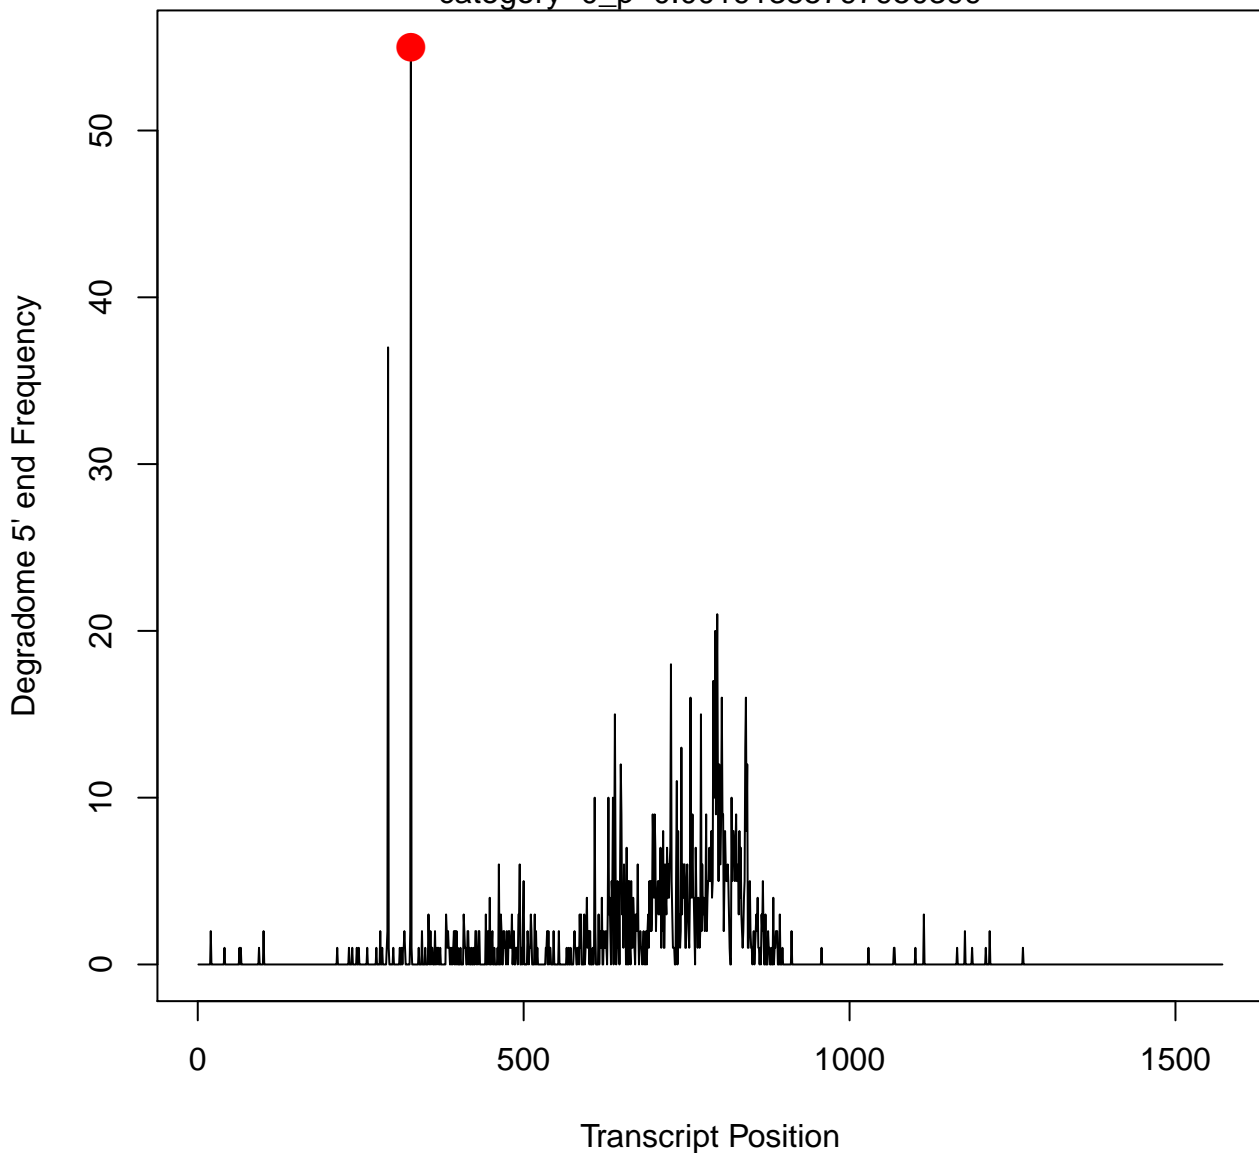

Supplement: s1 [file s1]

**T=Cluster-18410.63046\_Q=pma-miR482a\_S=129**

category=0\_p=0.0752736385395509

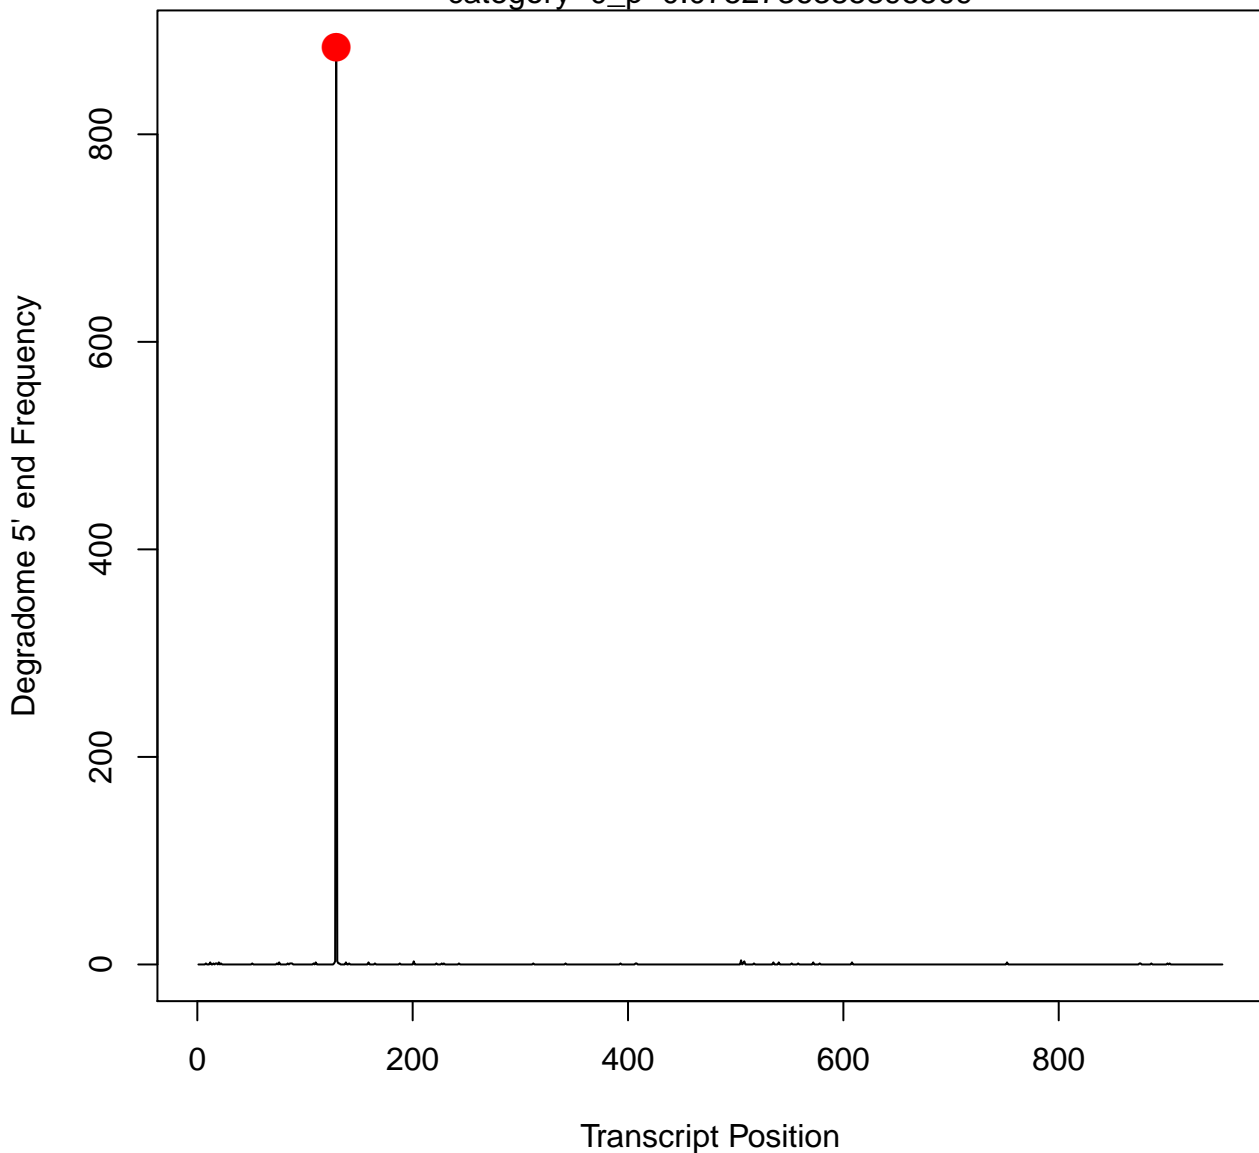

Supplement: s1 [file s1]

**T=Cluster-18410.71953\_Q=novel\_35\_S=60**

category=0\_p=0.00817521894783257

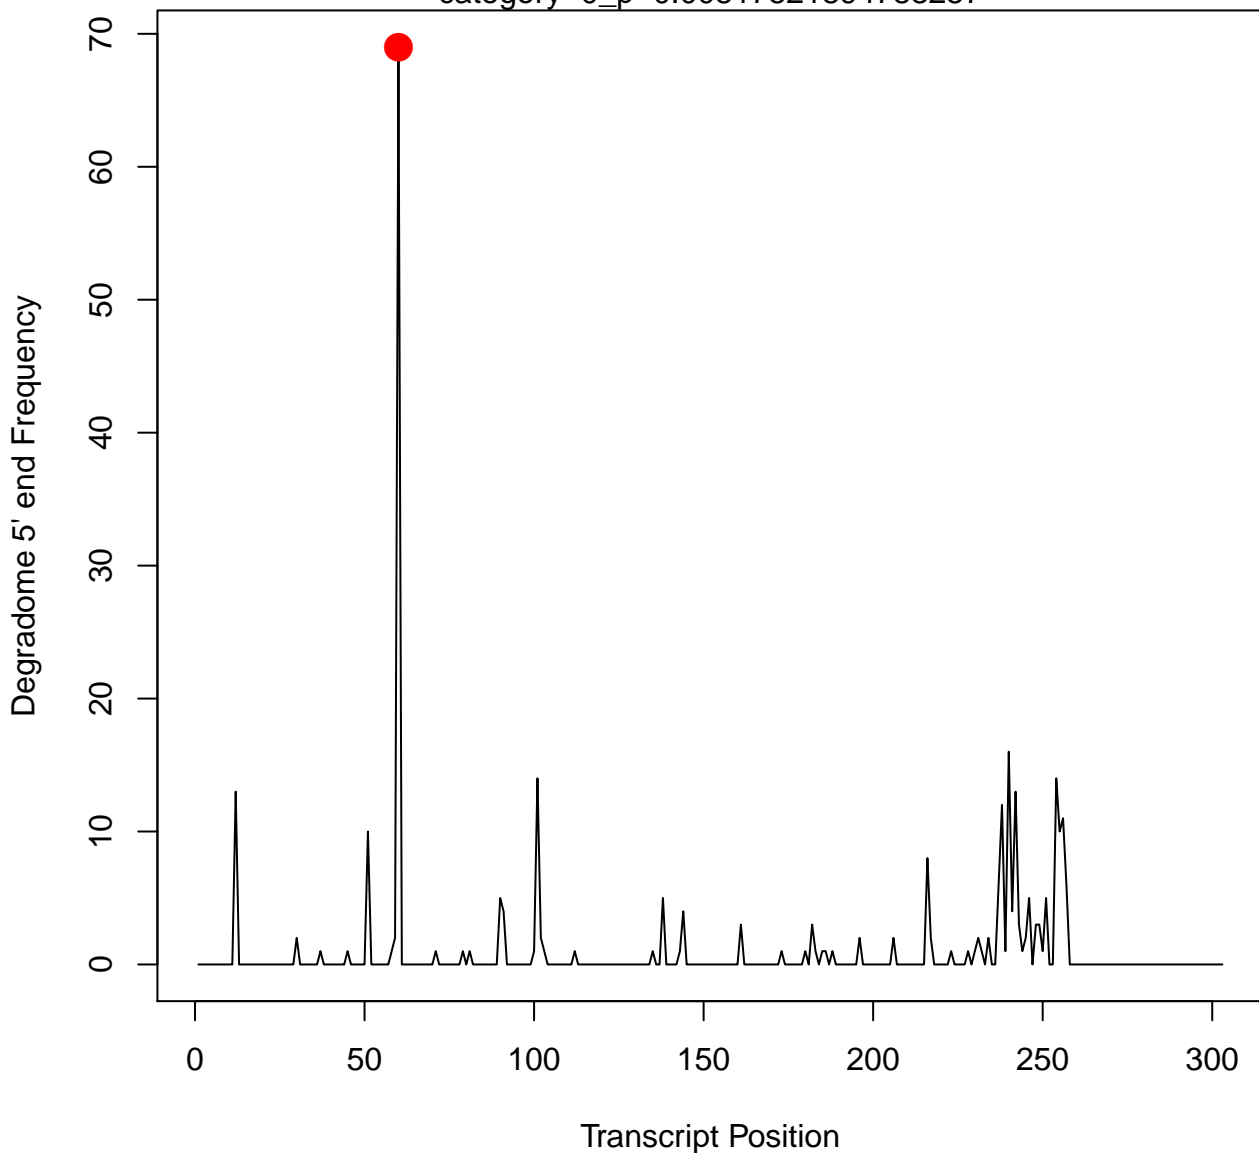

Supplement: s1 [file s1]

**T=Cluster-18410.79915\_Q=novel\_34\_S=222**

category=0\_p=0.00191355797950399

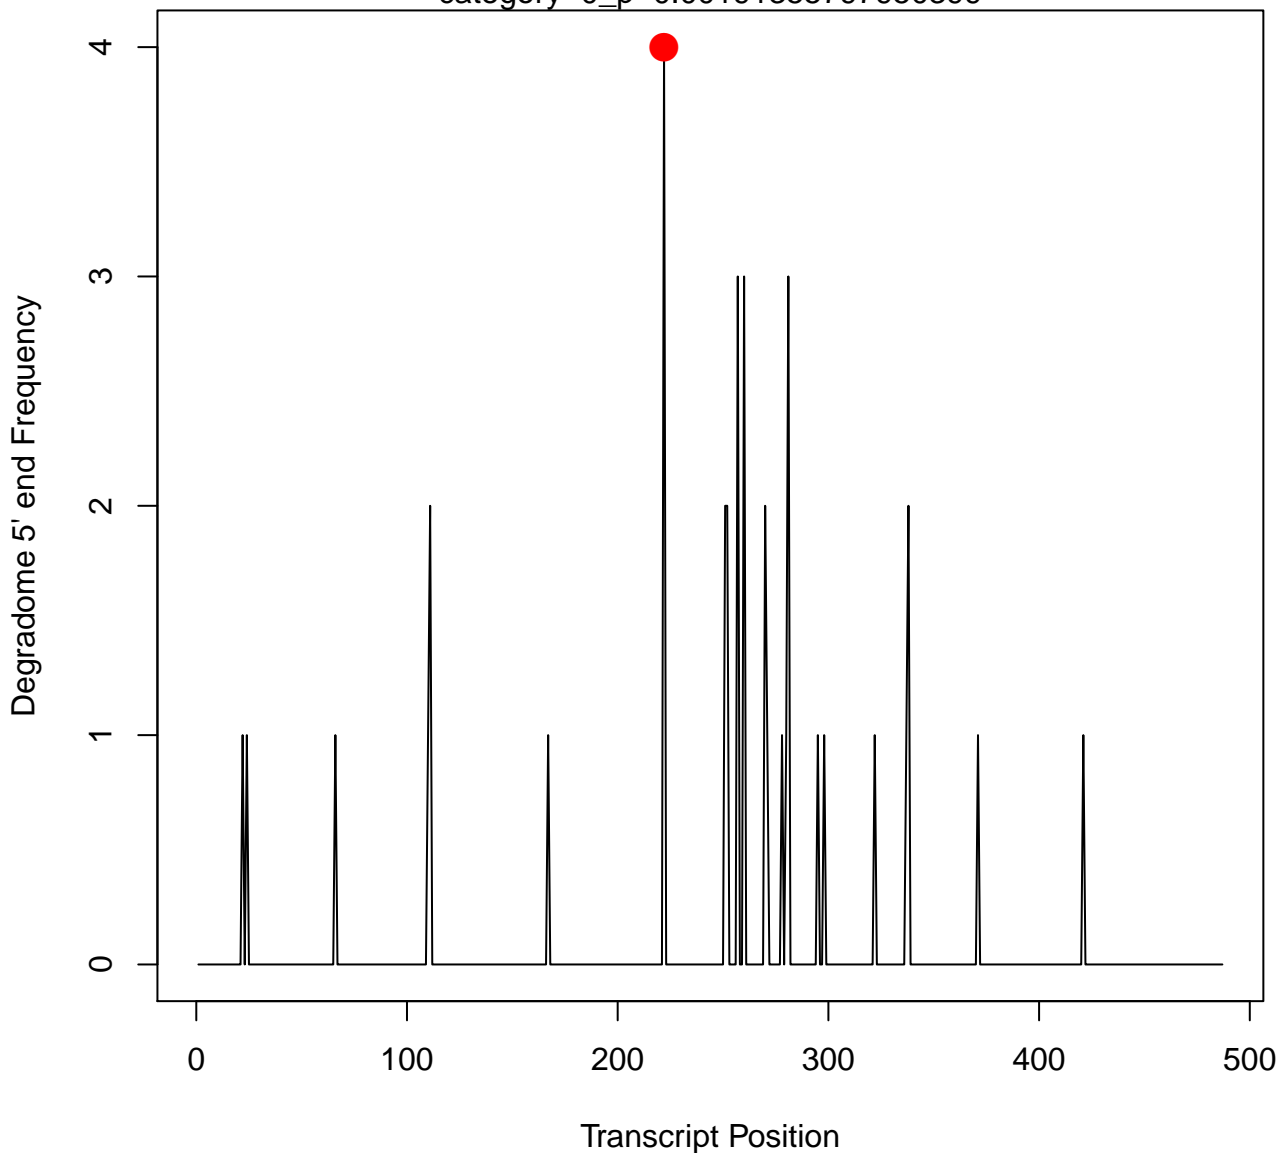

Supplement: s1 [file s1]

**T=Cluster-18410.33579\_Q=novel\_174\_S=27**

category=0\_p=0.035210347049452

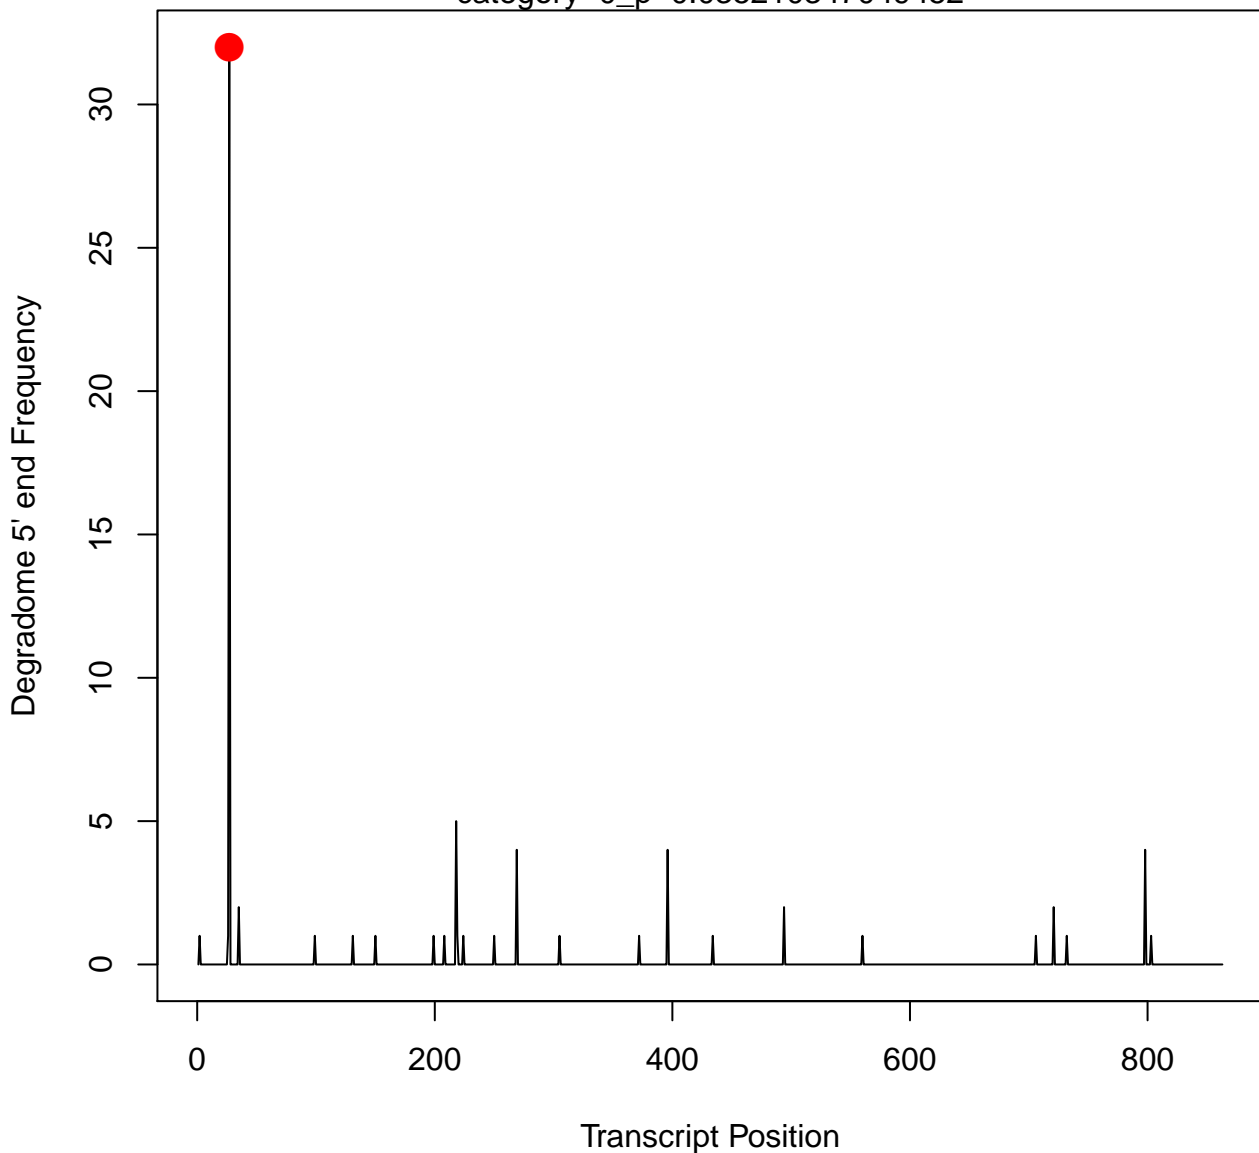

Supplement: s1 [file s1]

**T=Cluster-18410.78677\_Q=novel\_60\_S=1092**

category=2\_p=0.0673240995462872

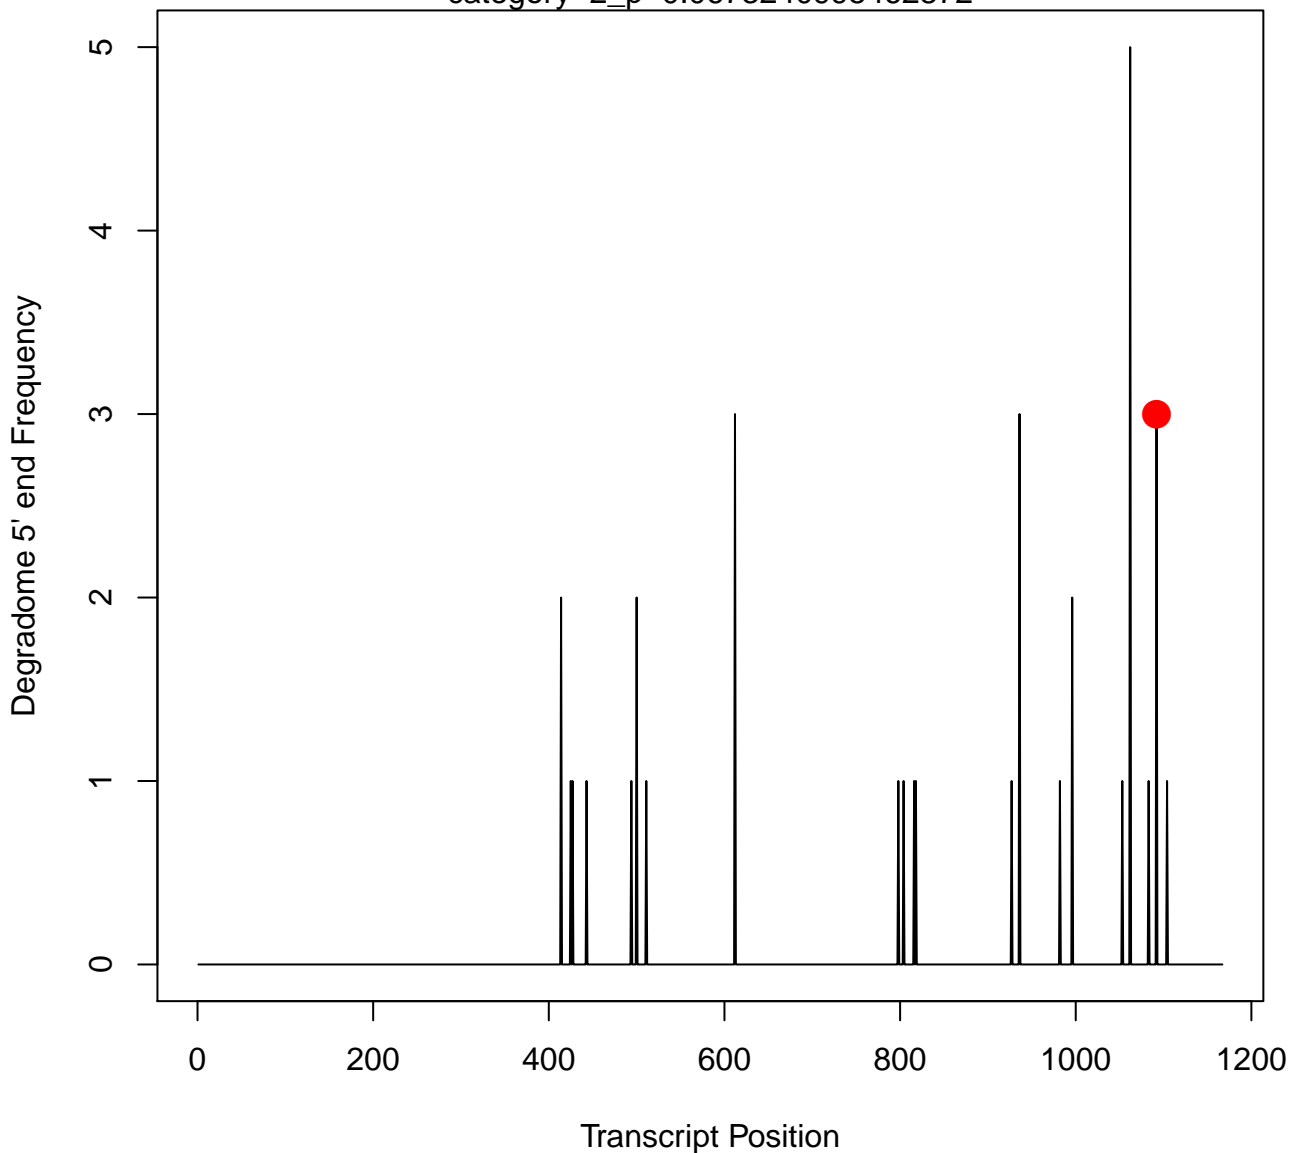

Supplement: s1 [file s1]

**T=Cluster-18410.8475\_Q=novel\_74\_S=543**

category=0\_p=0.00245961596621247

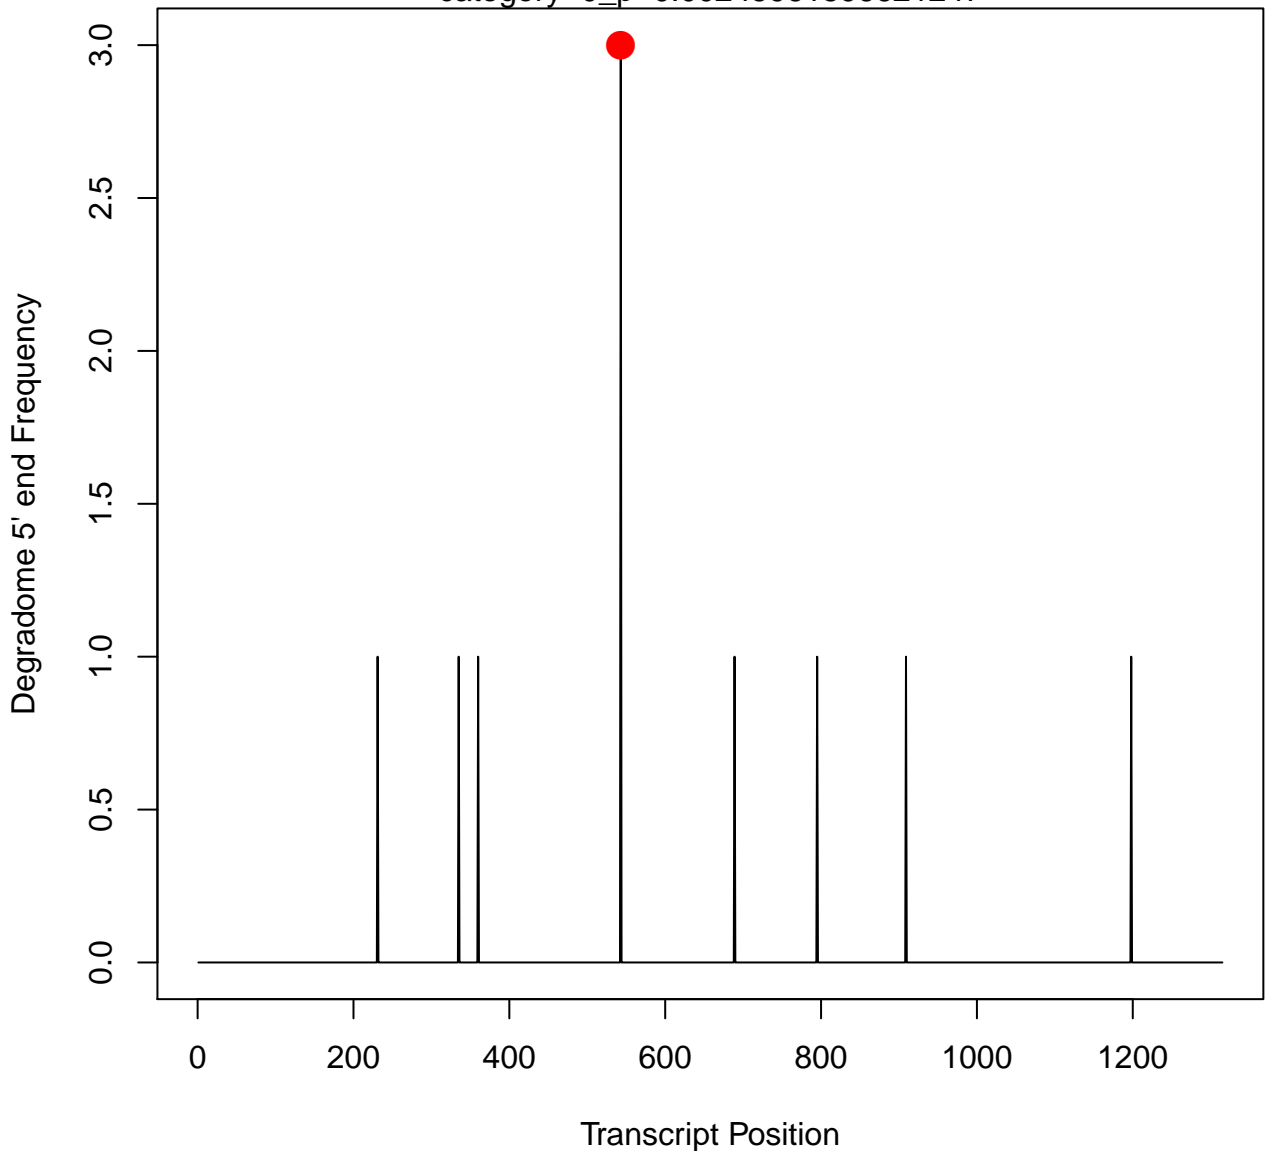

Supplement: s1 [file s1]

**T=Cluster-18410.87951\_Q=novel\_168\_S=1647**

category=0\_p=0.0216523334092837

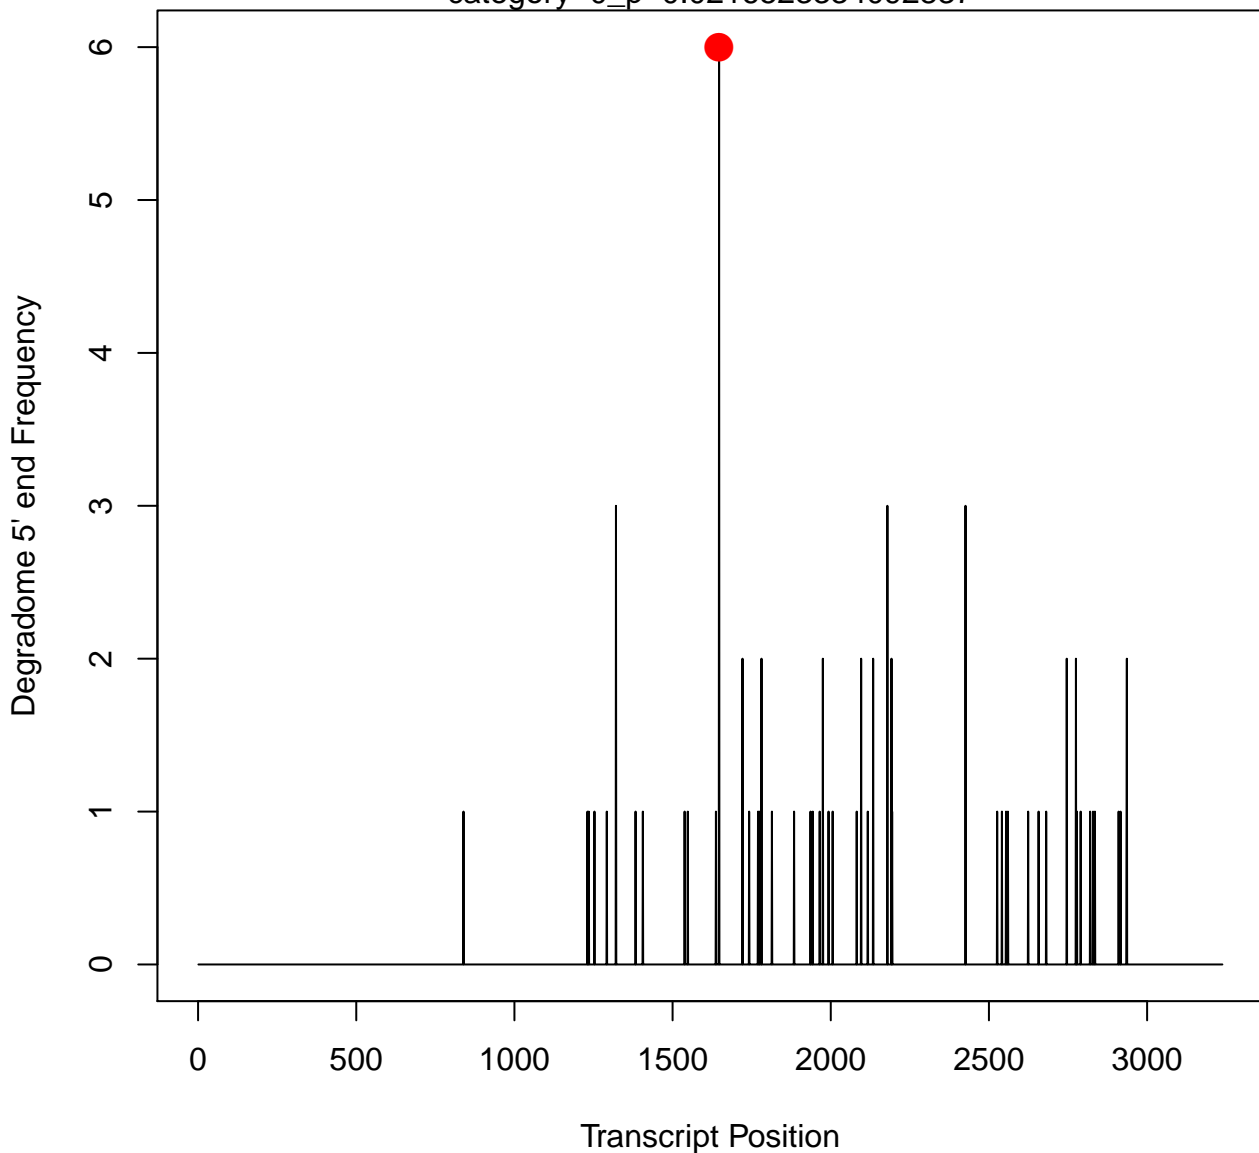

Supplement: s1 [file s1]

**T=Cluster-18410.71103\_Q=novel\_79\_S=813**

category=3\_p=0.0881450085293495

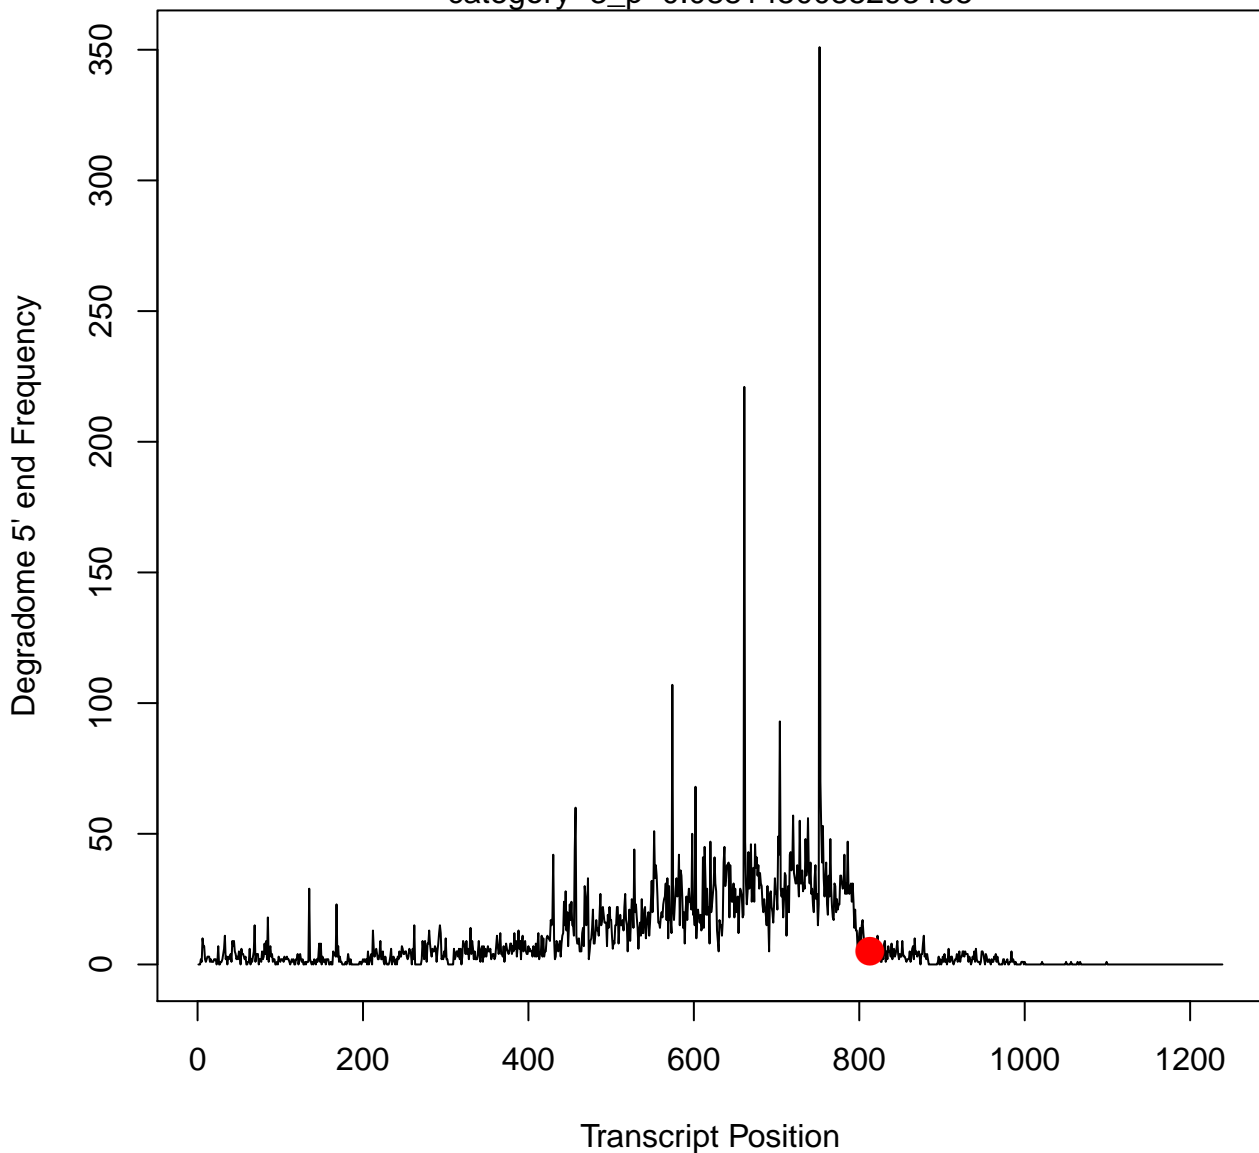

Supplement: s1 [file s1]

**T=Cluster-18410.73420\_Q=novel\_92\_S=1772**

category=0\_p=0.00382345425486719

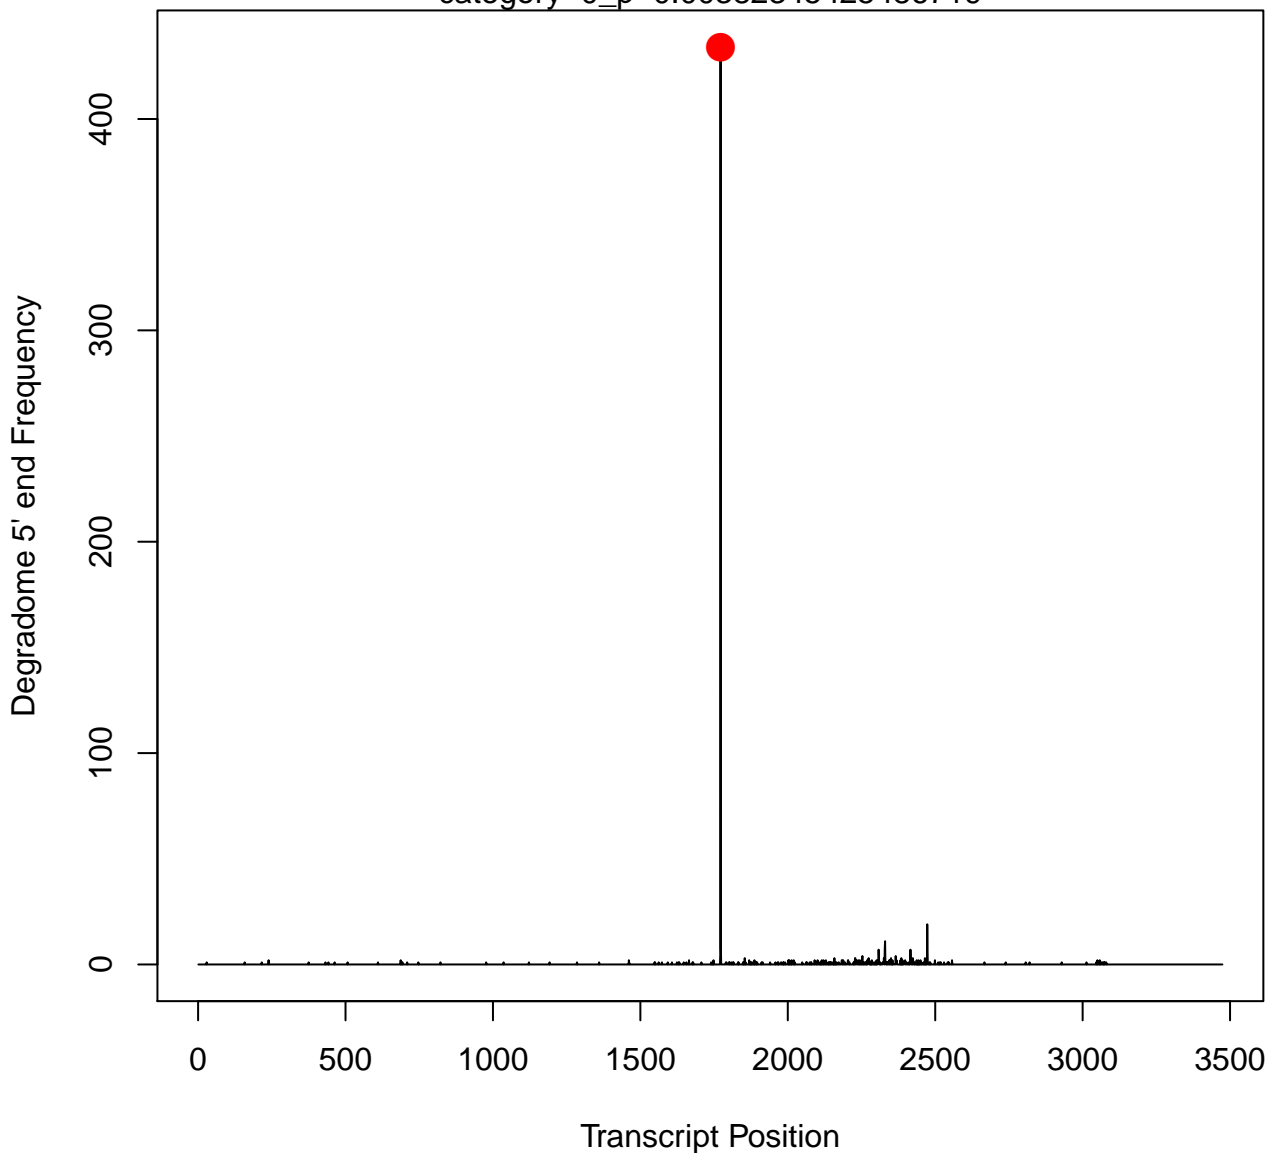

Supplement: s1 [file s1]

**T=Cluster-18410.85494\_Q=novel\_54\_S=68**

category=2\_p=0.0229647072699788

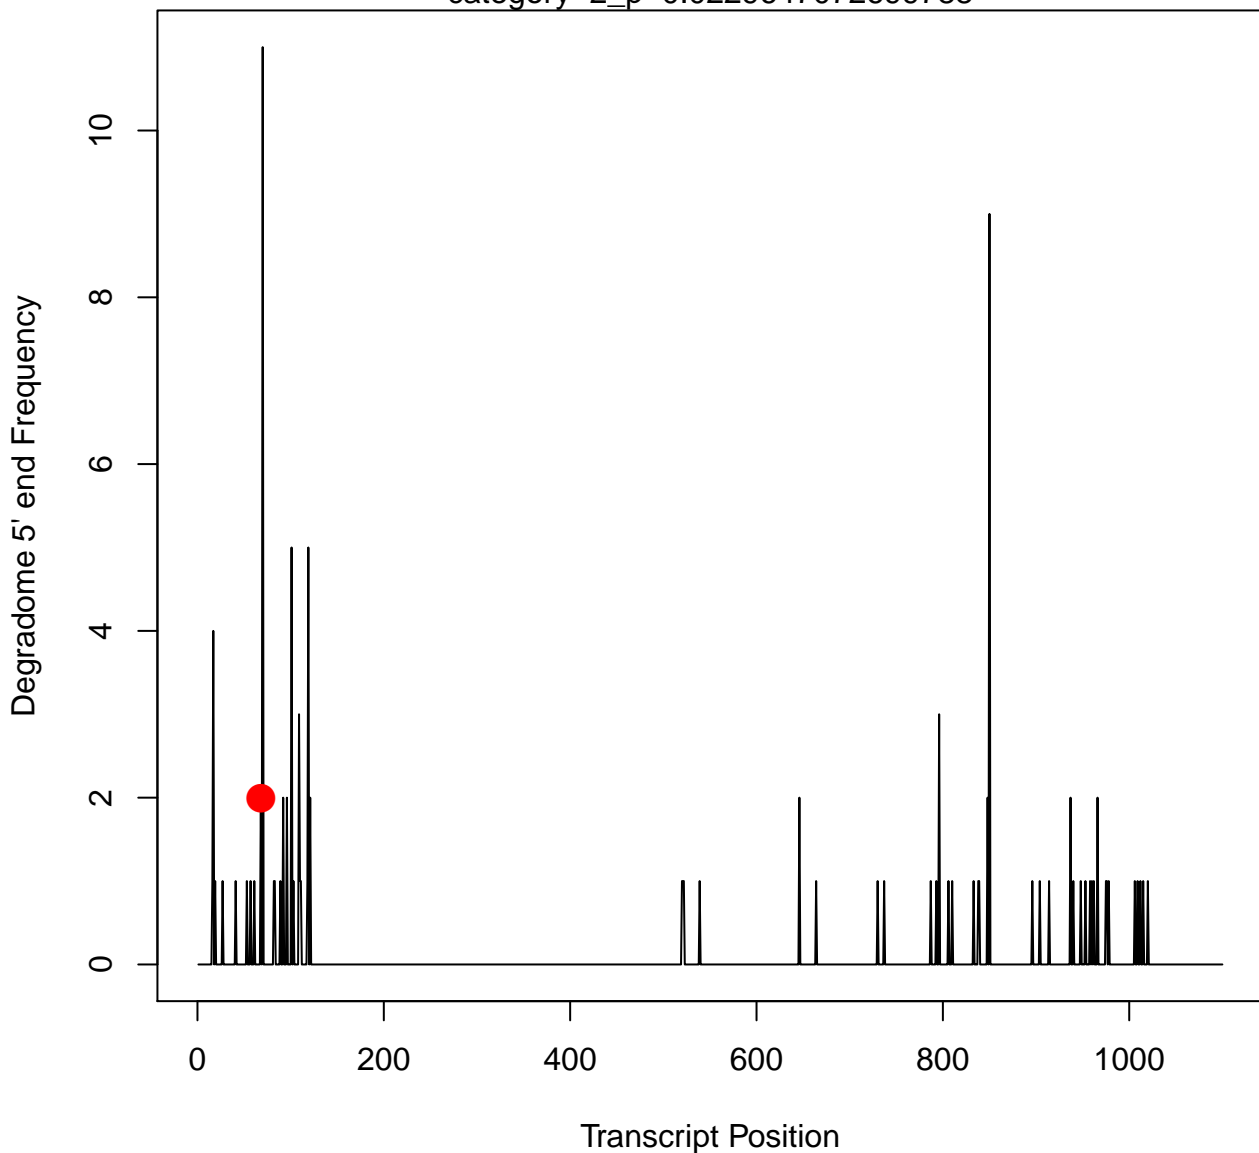

Supplement: s1 [file s1]

**T=Cluster-18410.65205\_Q=novel\_159\_S=921**

category=2\_p=0.0564267304887326

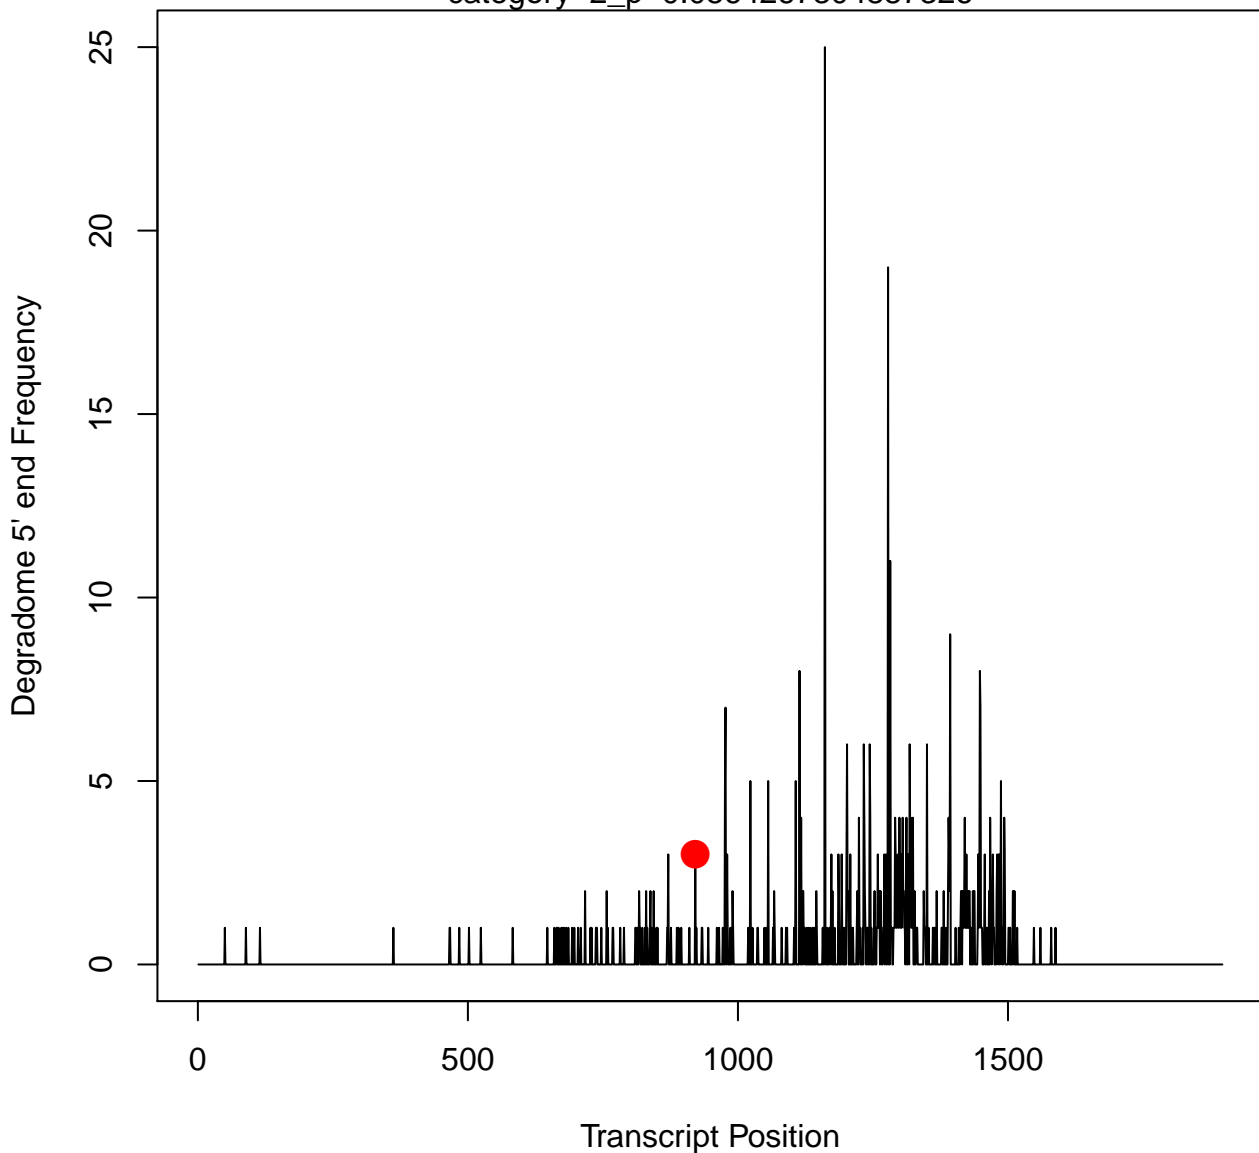

Supplement: s1 [file s1]

**T=Cluster-18410.36714\_Q=novel\_46\_S=642**

category=0\_p=0.00191355797950399

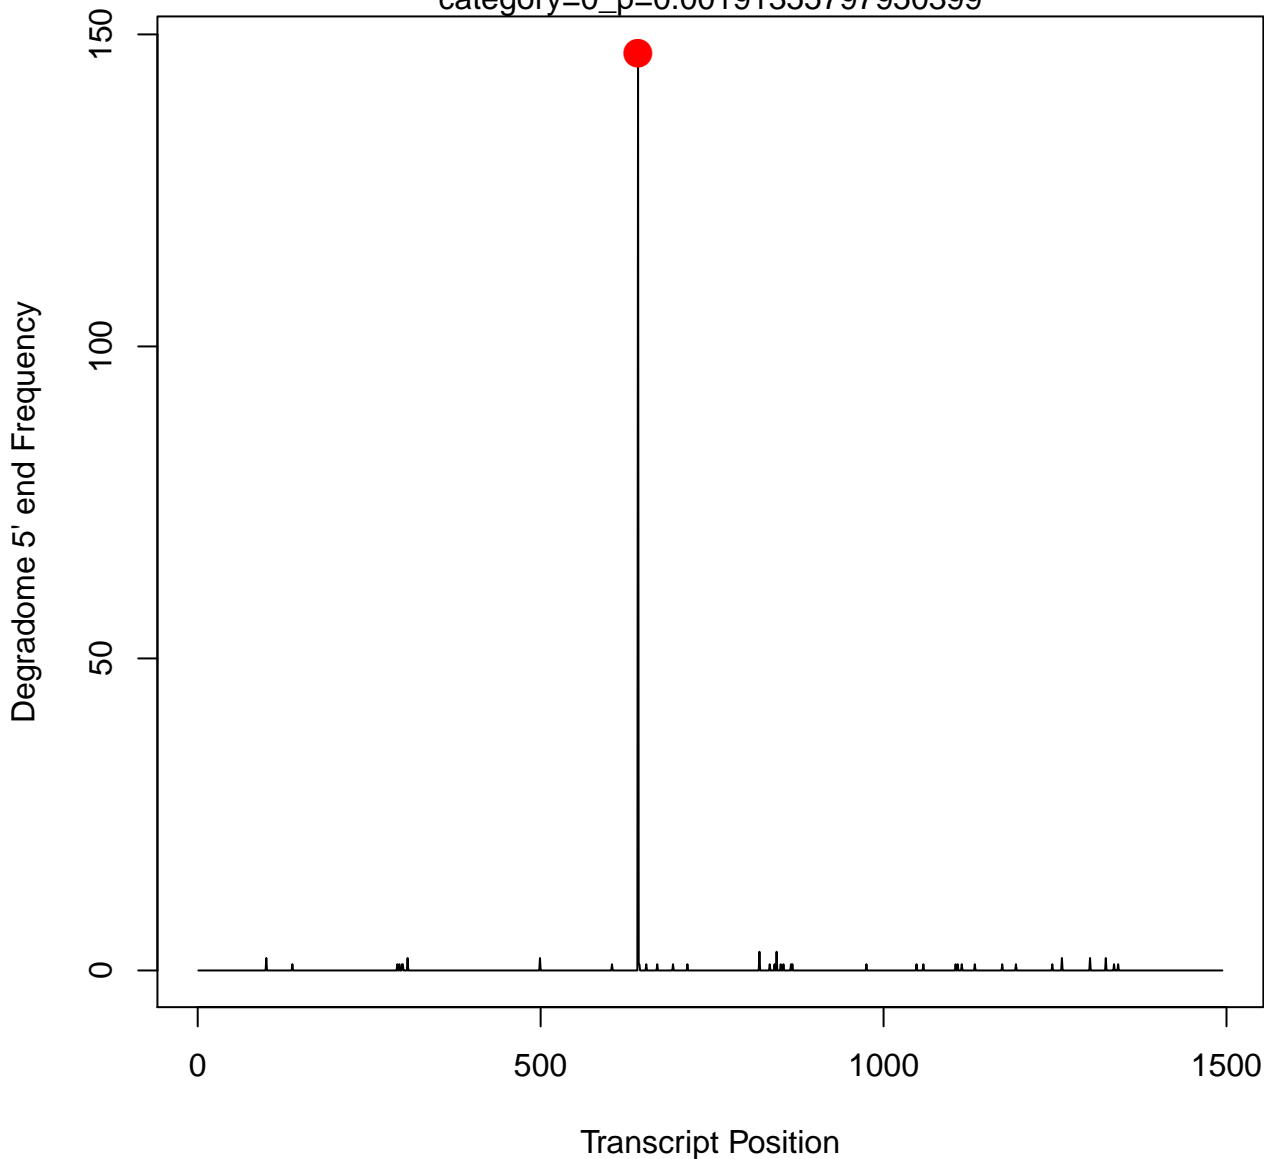

Supplement: s1 [file s1]

**T=Cluster-18410.92886\_Q=novel\_42\_S=120**

category=0\_p=0.00790379146763054

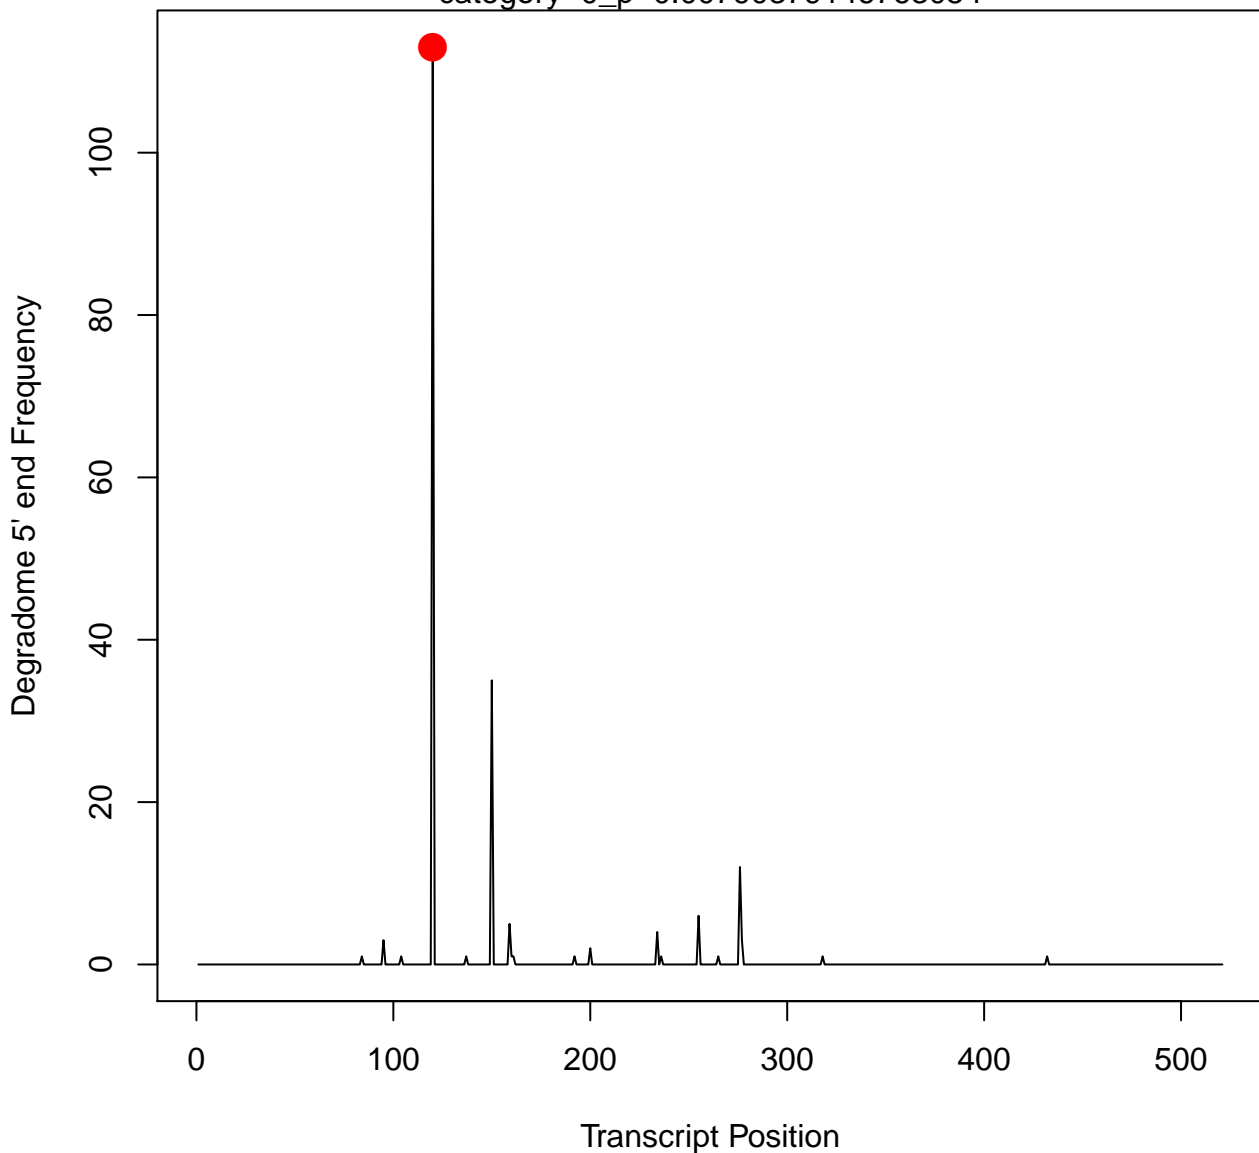

Supplement: s1 [file s1]

**T=Cluster-18410.49874\_Q=novel\_122\_S=2080**

category=1\_p=0.0102417593291722

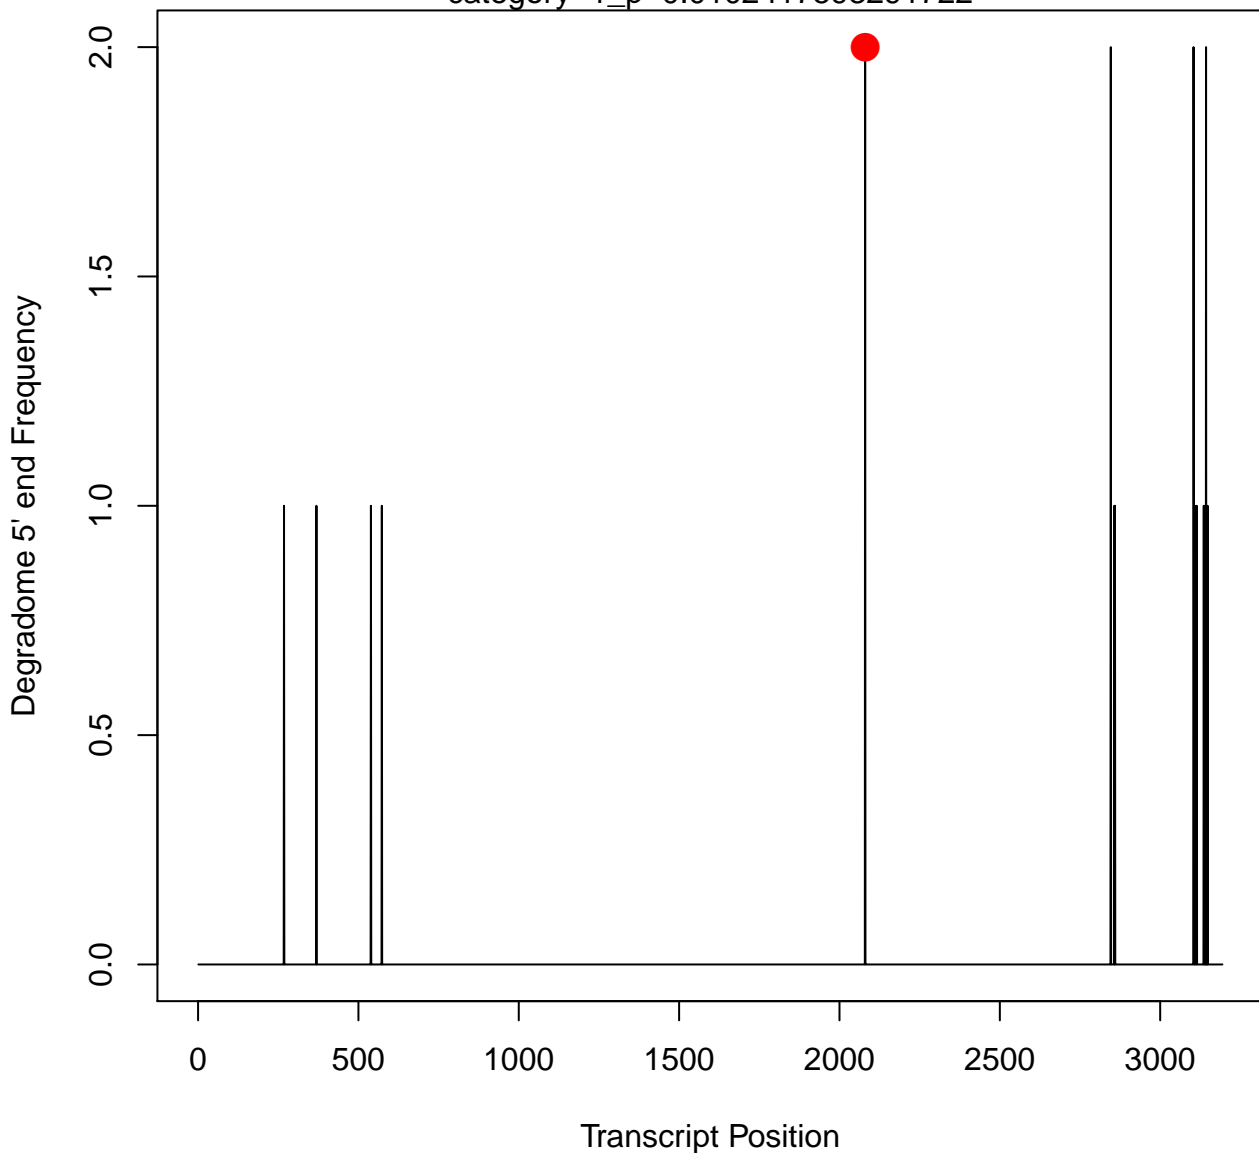

Supplement: s1 [file s1]

**T=Cluster-18410.53088\_Q=novel\_41\_S=241**

category=2\_p=0.0780956144108357

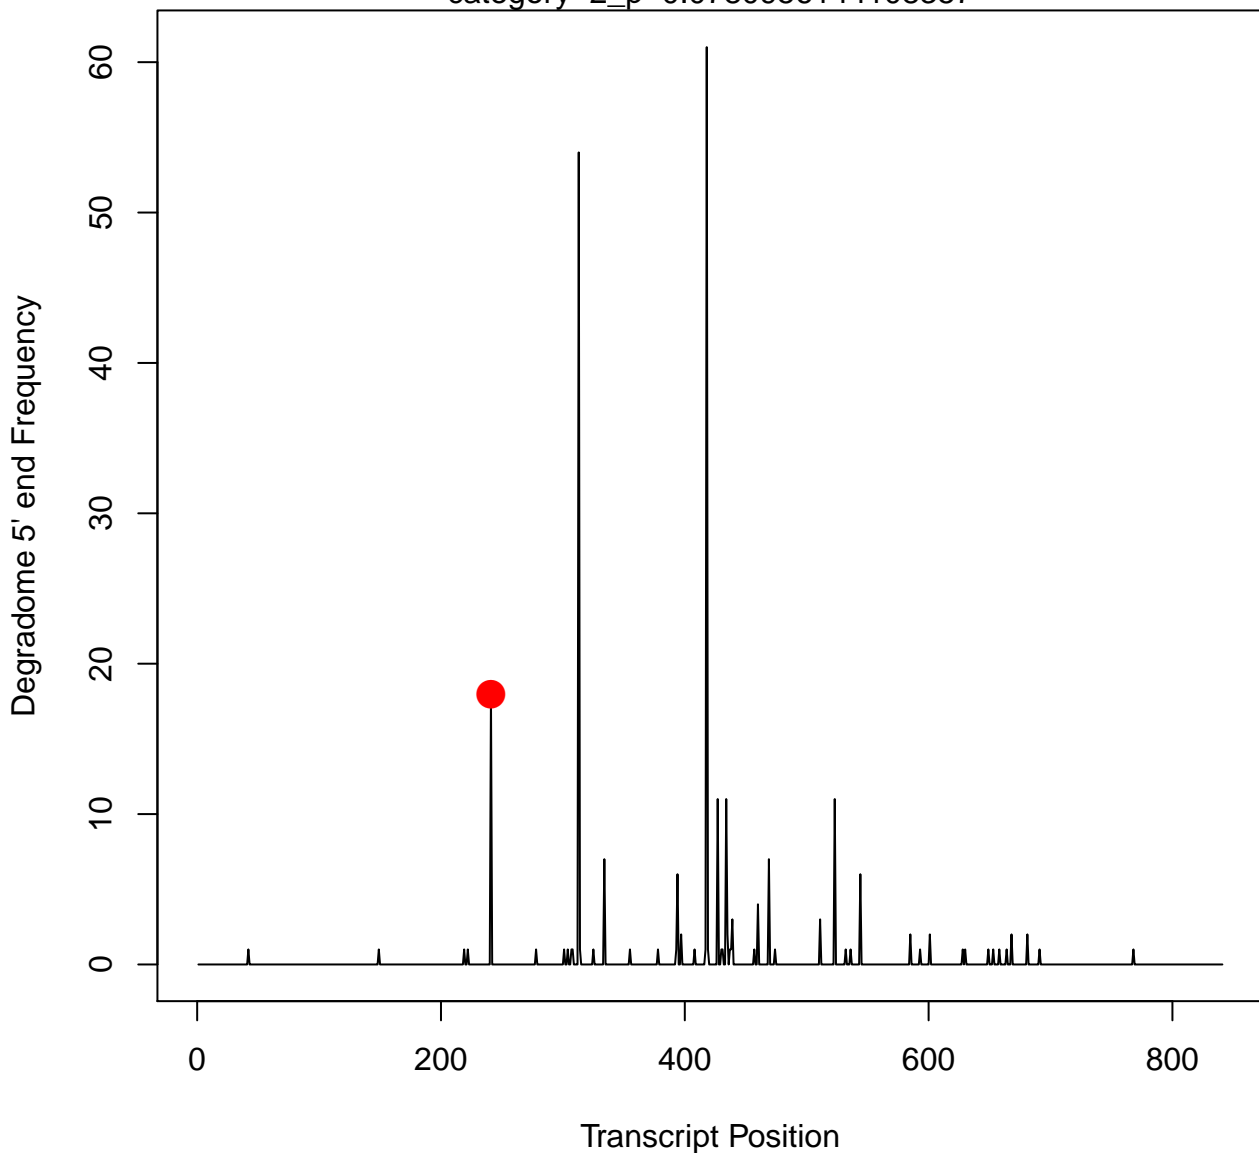

Supplement: s1 [file s1]

**T=Cluster-18410.81258\_Q=novel\_148\_S=21**

category=0\_p=0.00300537520191857

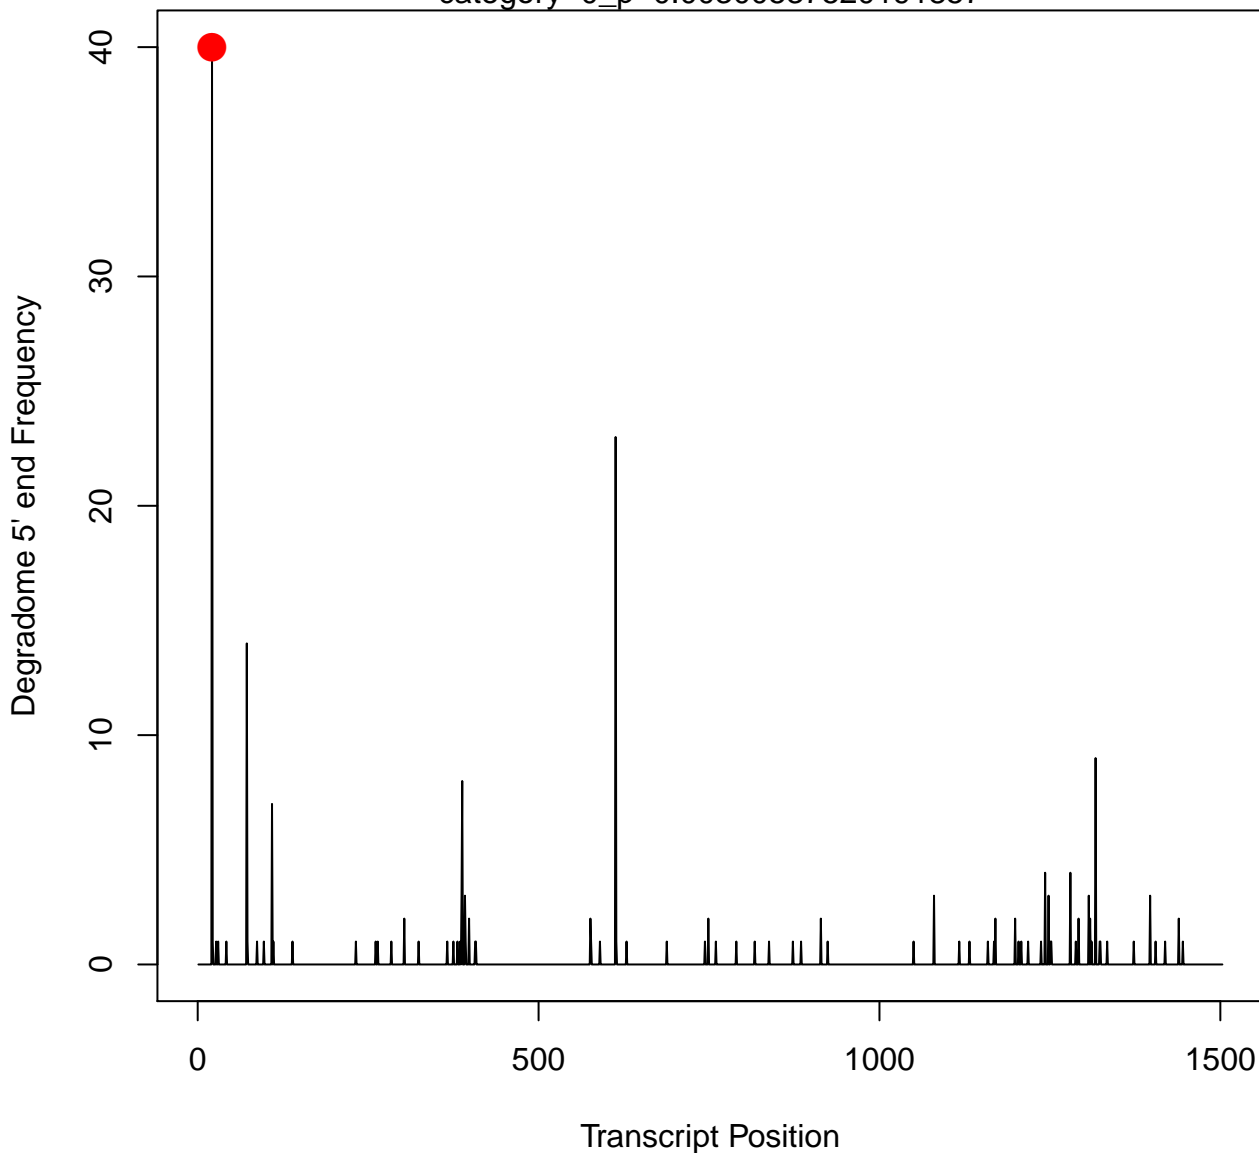

Supplement: s1 [file s1]

**T=Cluster-18410.30757\_Q=novel\_9\_S=70**

category=0\_p=0.00355083585007077

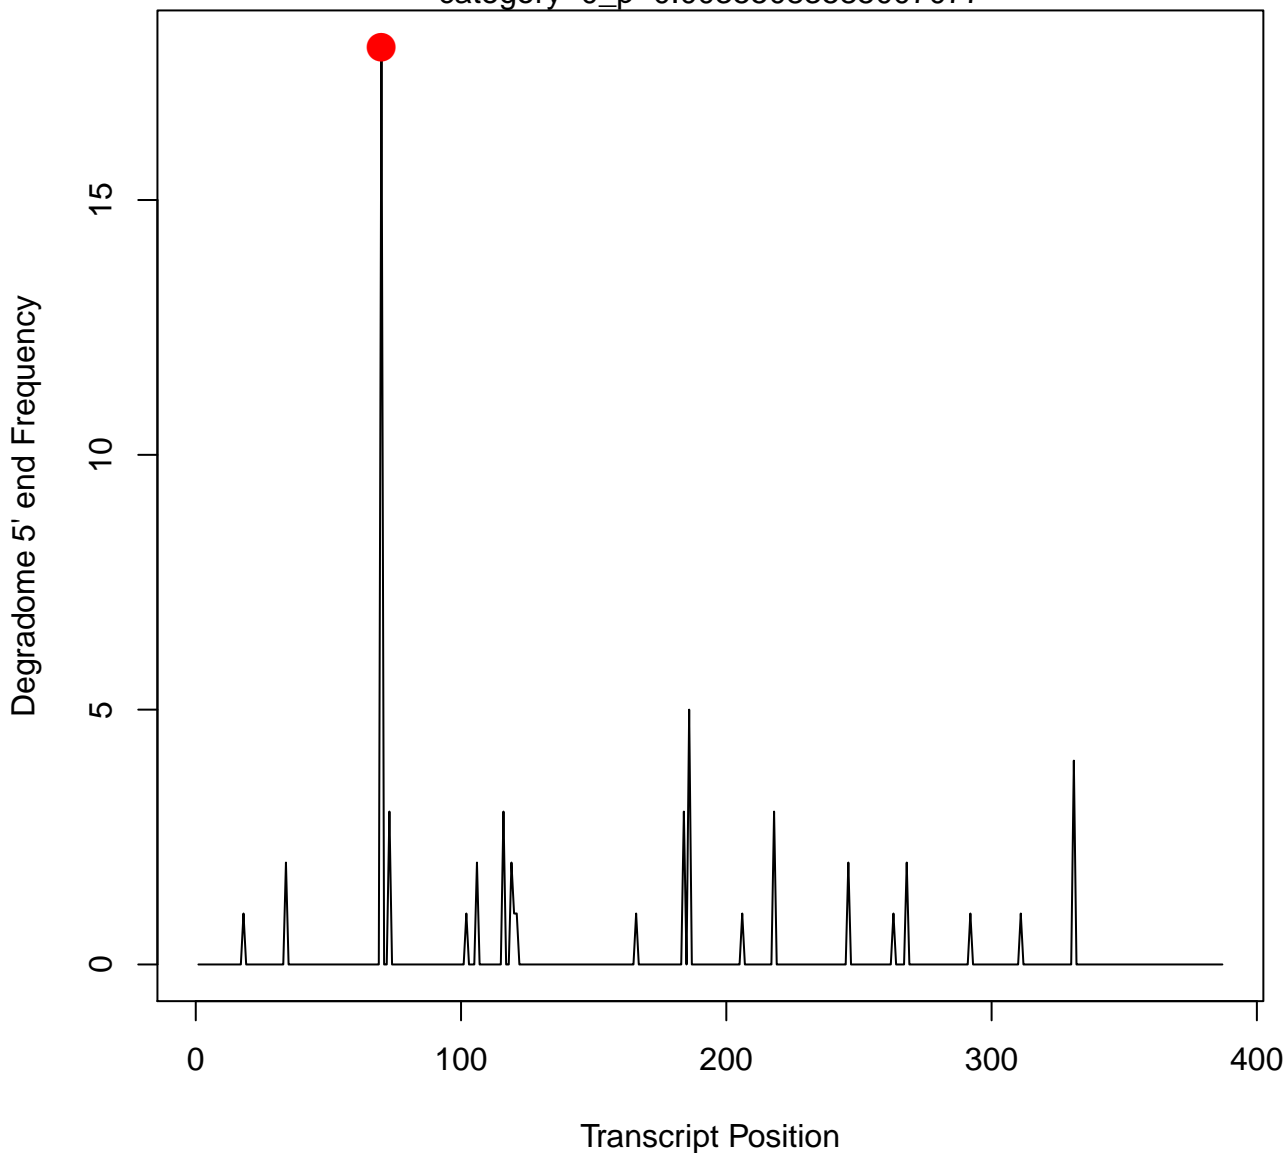

Supplement: s1 [file s1]

**T=Cluster-18410.69983\_Q=pma-miR946a-3p\_S=2617**

category=0\_p=0.0253930009578494

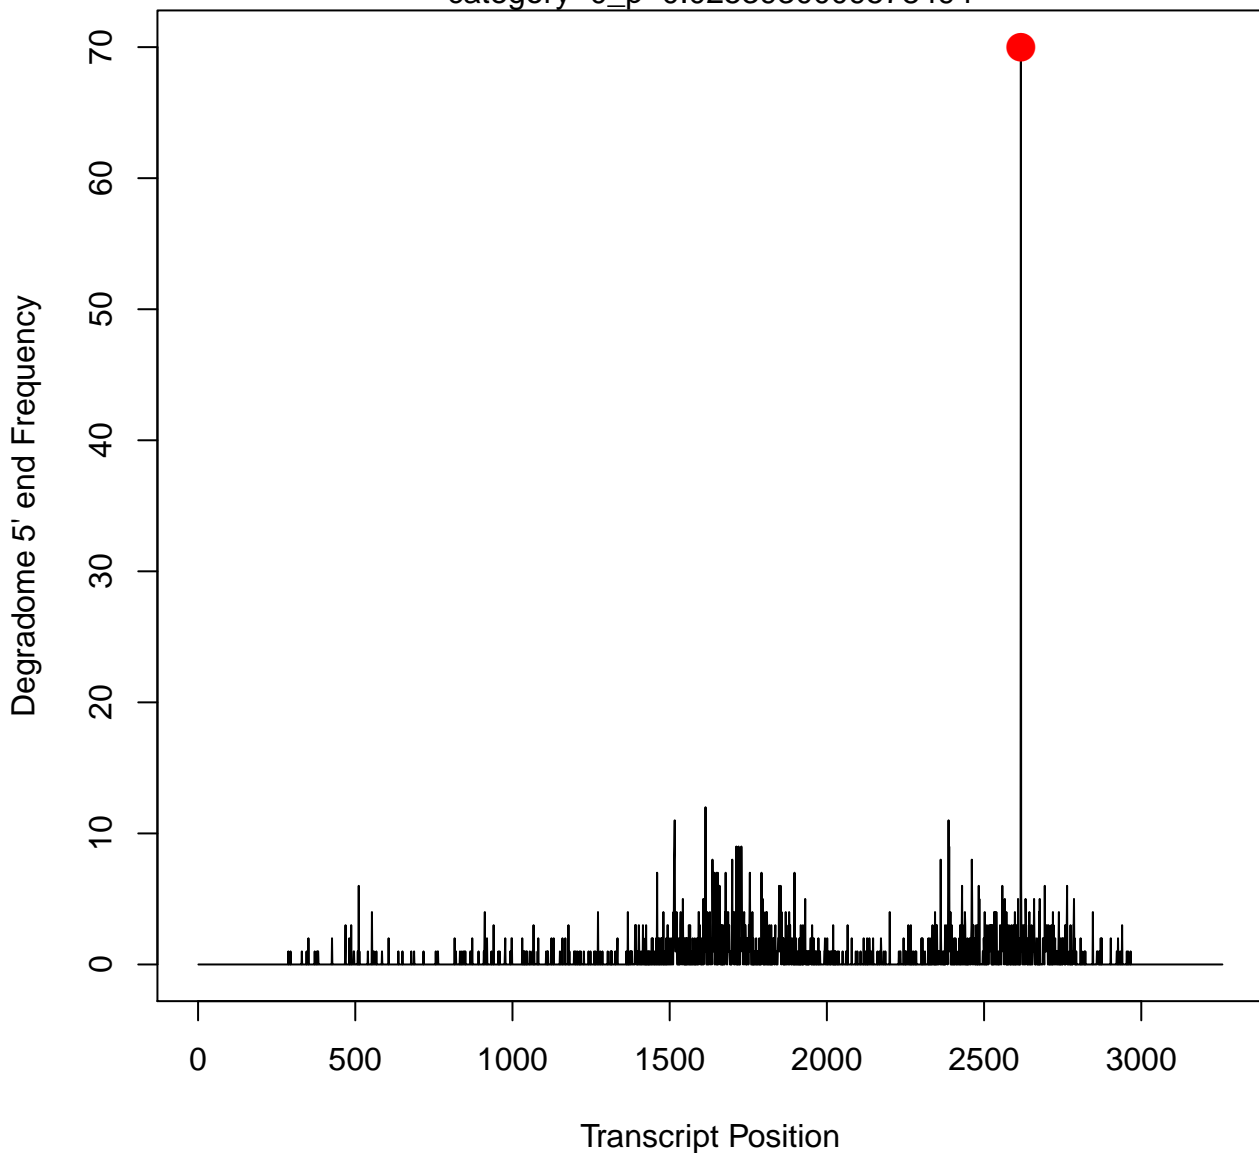

Supplement: s1 [file s1]

**T=Cluster-18410.37058\_Q=pma-miR951\_S=350**

category=0\_p=0.00191355797950399

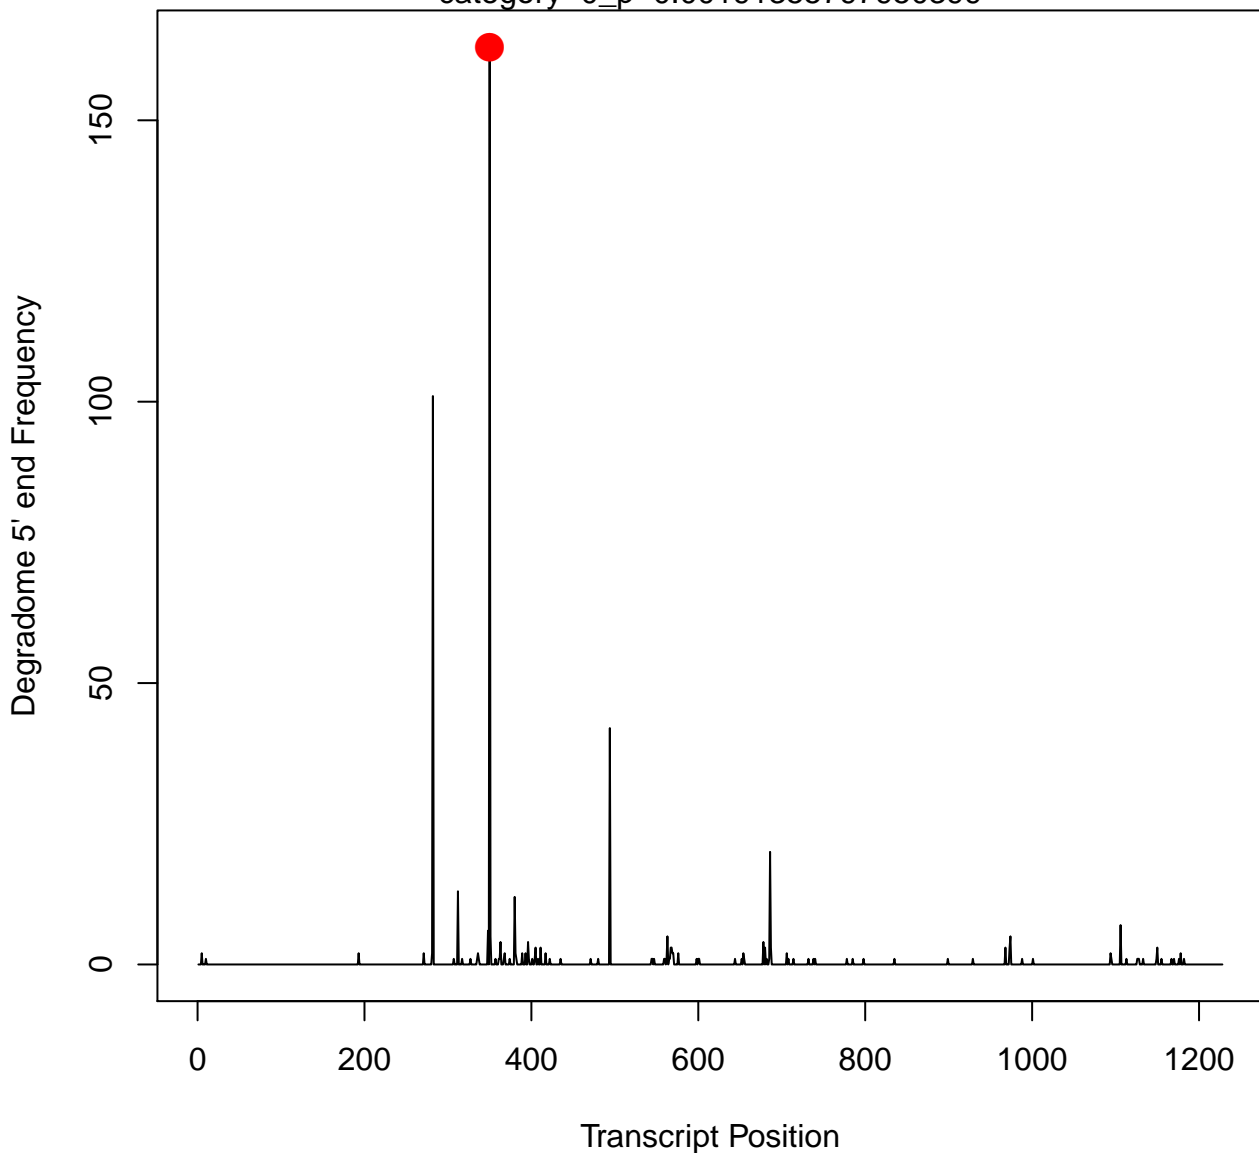

Supplement: s1 [file s1]

**T=Cluster-18410.49133\_Q=novel\_97\_S=742**

category=3\_p=0.0681306920296354

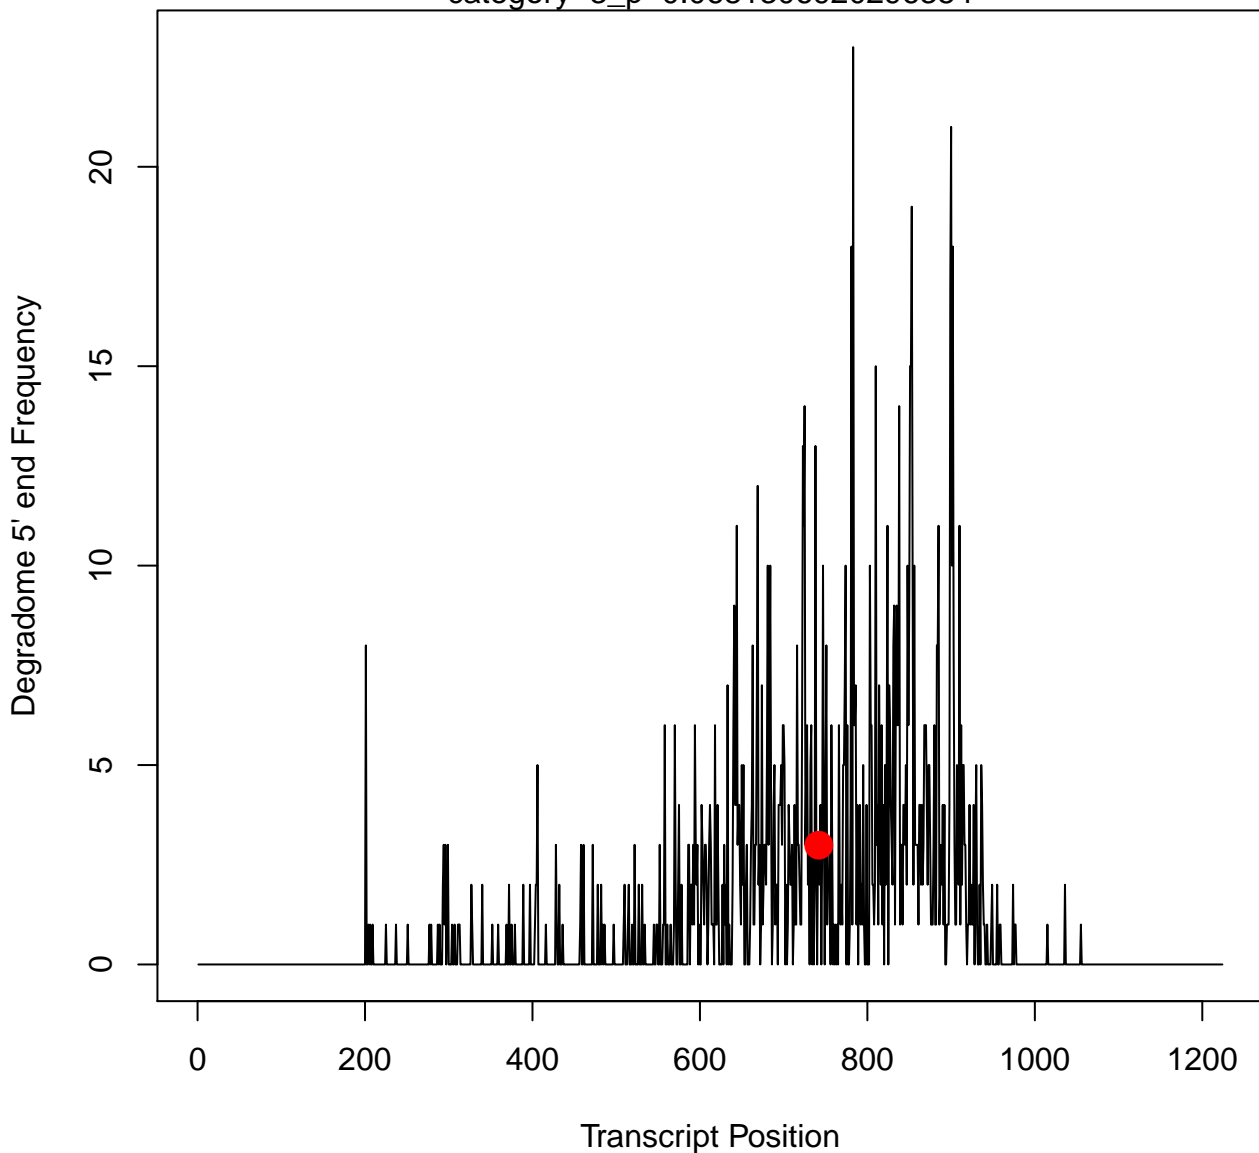

Supplement: s1 [file s1]

**T=Cluster-18410.23018\_Q=novel\_146\_S=232**

category=0\_p=0.00436846732795781

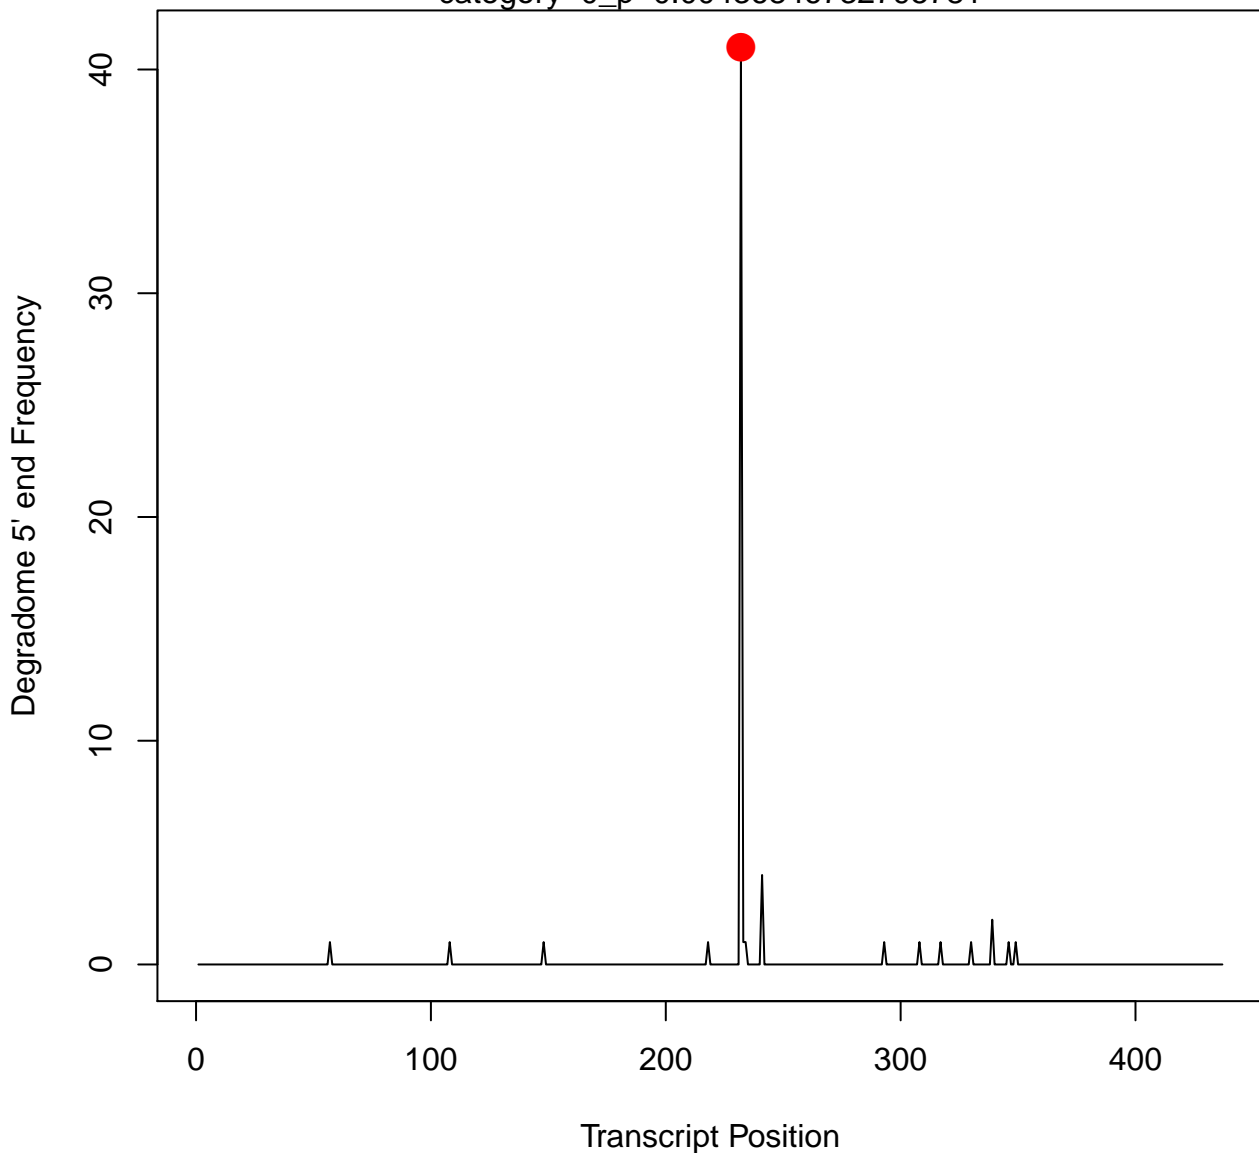

Supplement: s1 [file s1]

**T=Cluster-13722.2\_Q=novel\_74\_S=841**

category=0\_p=0.0173597013695821

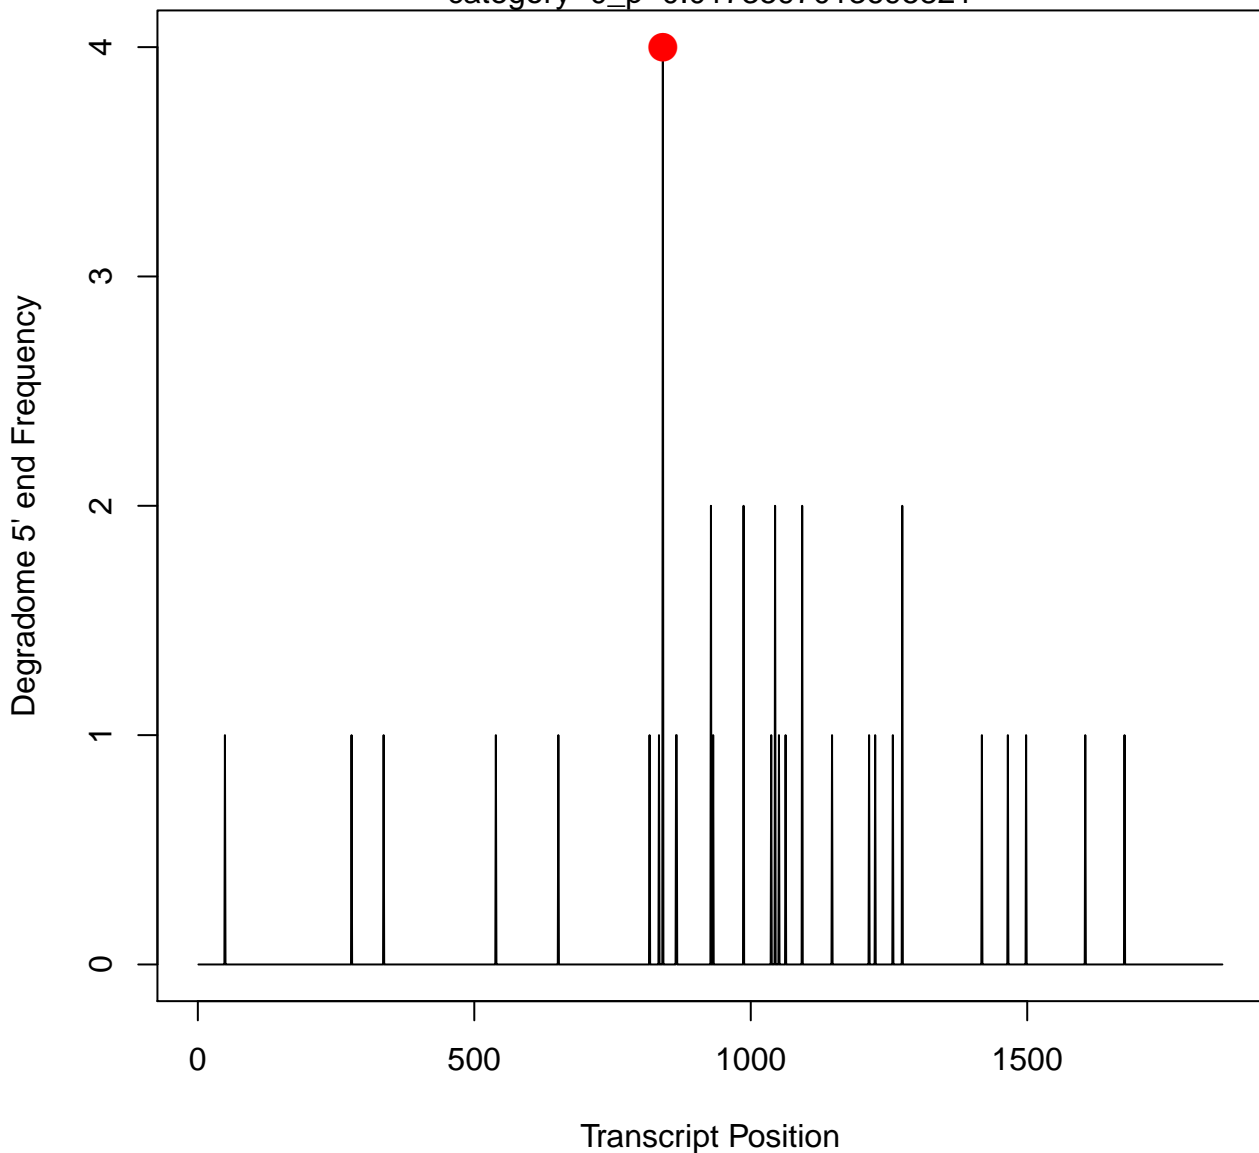

Supplement: s1 [file s1]

**T=Cluster-18410.75901\_Q=novel\_20\_S=1519**

category=0\_p=0.00300537520191857

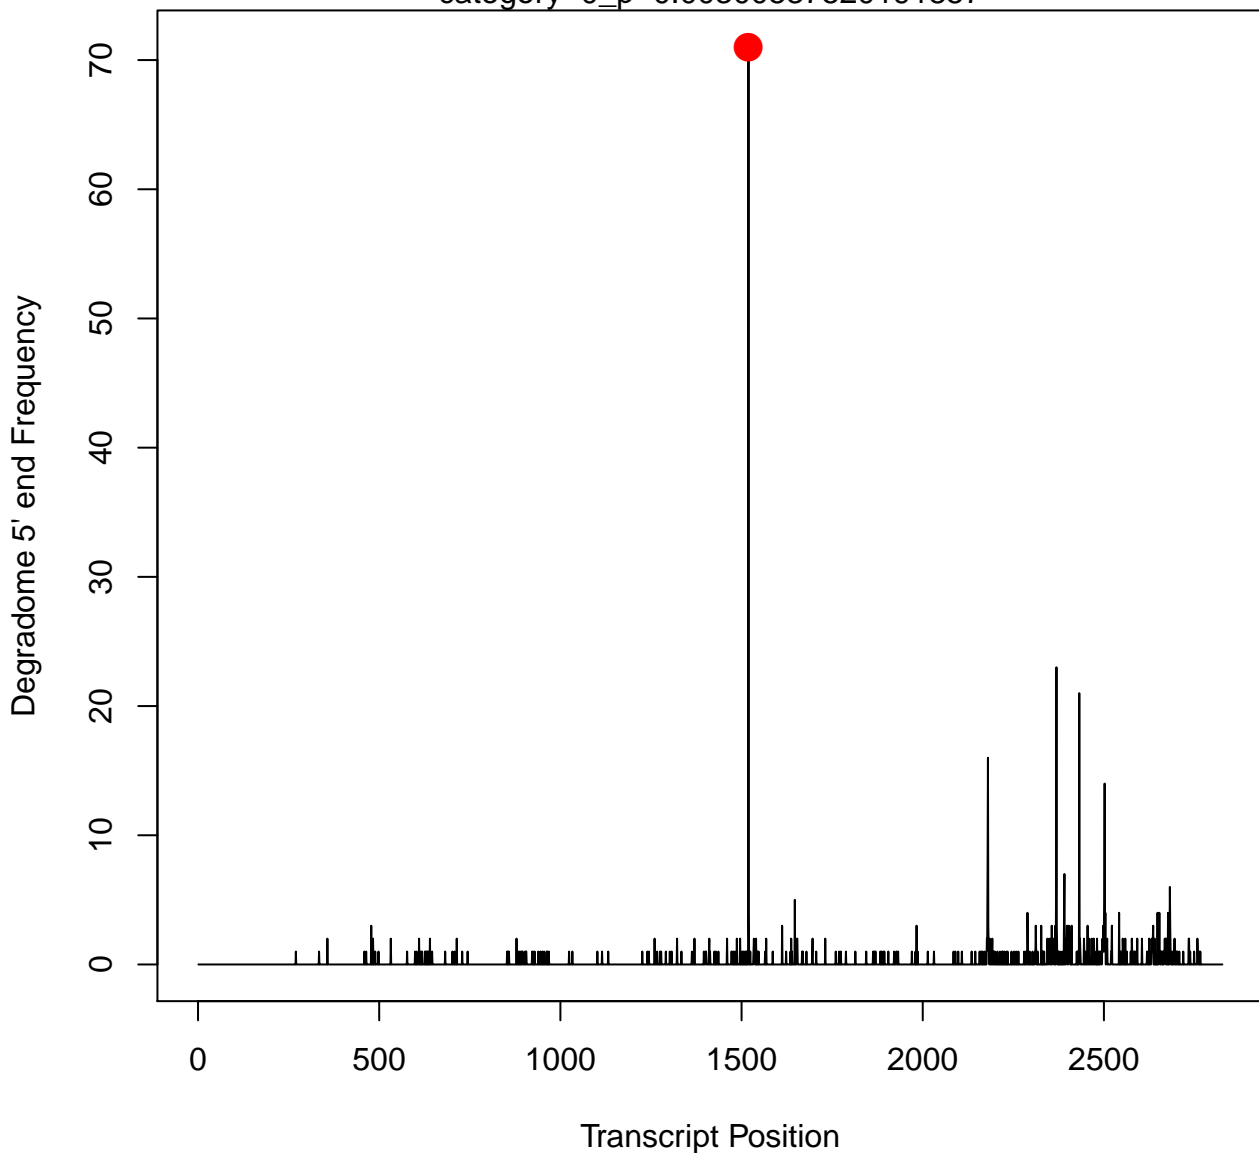

Supplement: s1 [file s1]

**T=Cluster-18410.28533\_Q=novel\_117\_S=133**

category=2\_p=0.0564267304887326

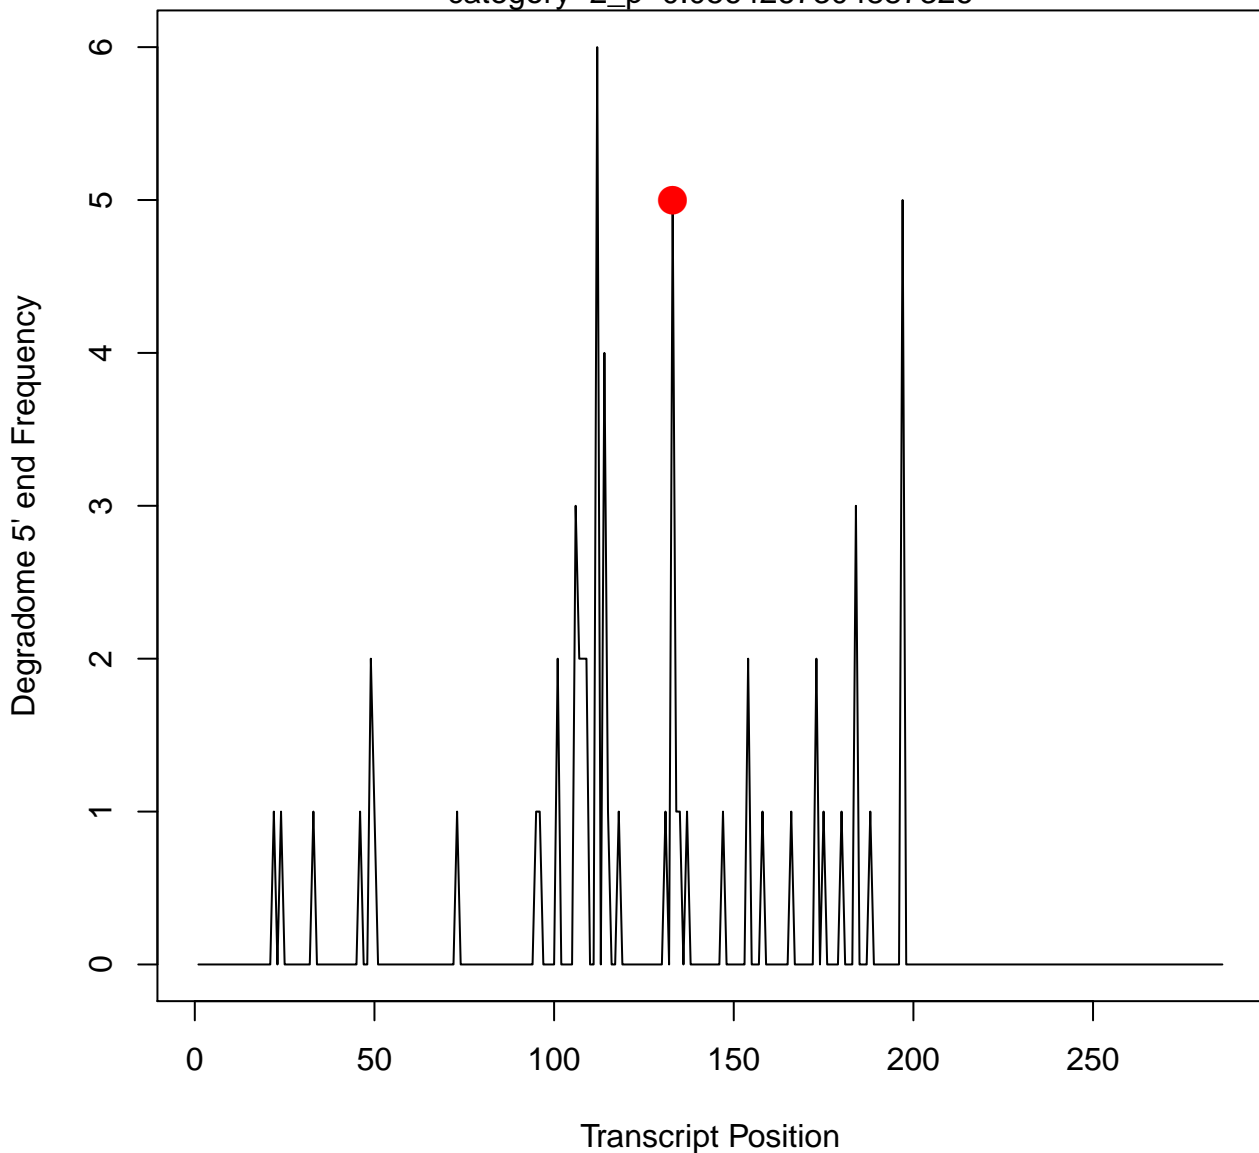

Supplement: s1 [file s1]

**T=Cluster-18410.25997\_Q=pma-miR951\_S=352**

category=0\_p=0.0040959980740275

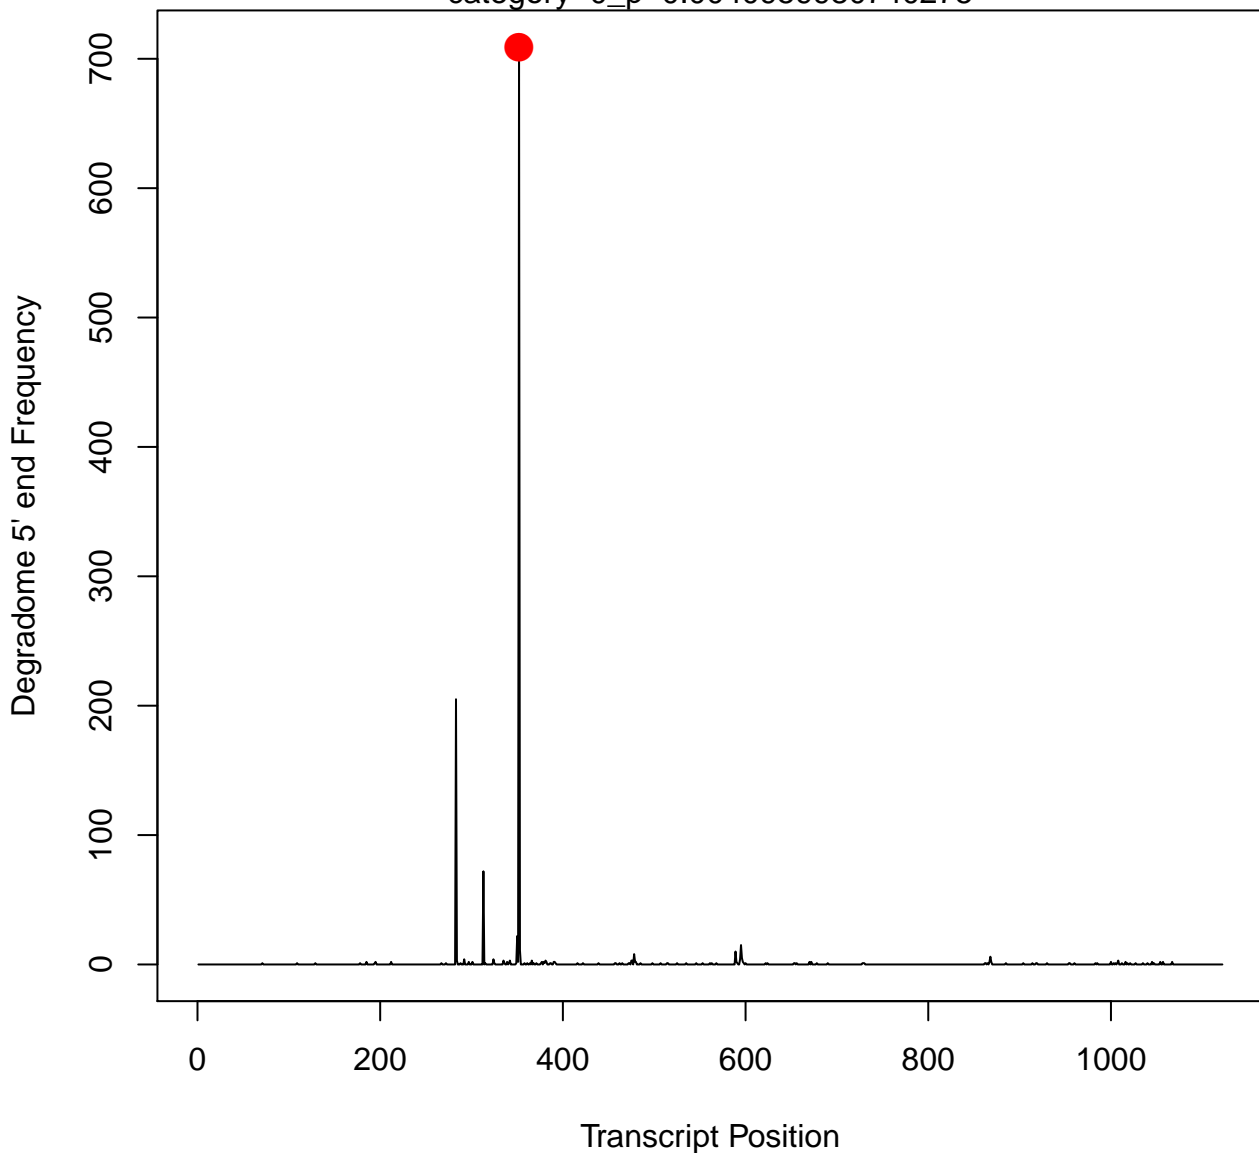

Supplement: s1 [file s1]

**T=Cluster-18410.70119\_Q=novel\_163\_S=44**

category=0\_p=0.017628541808552

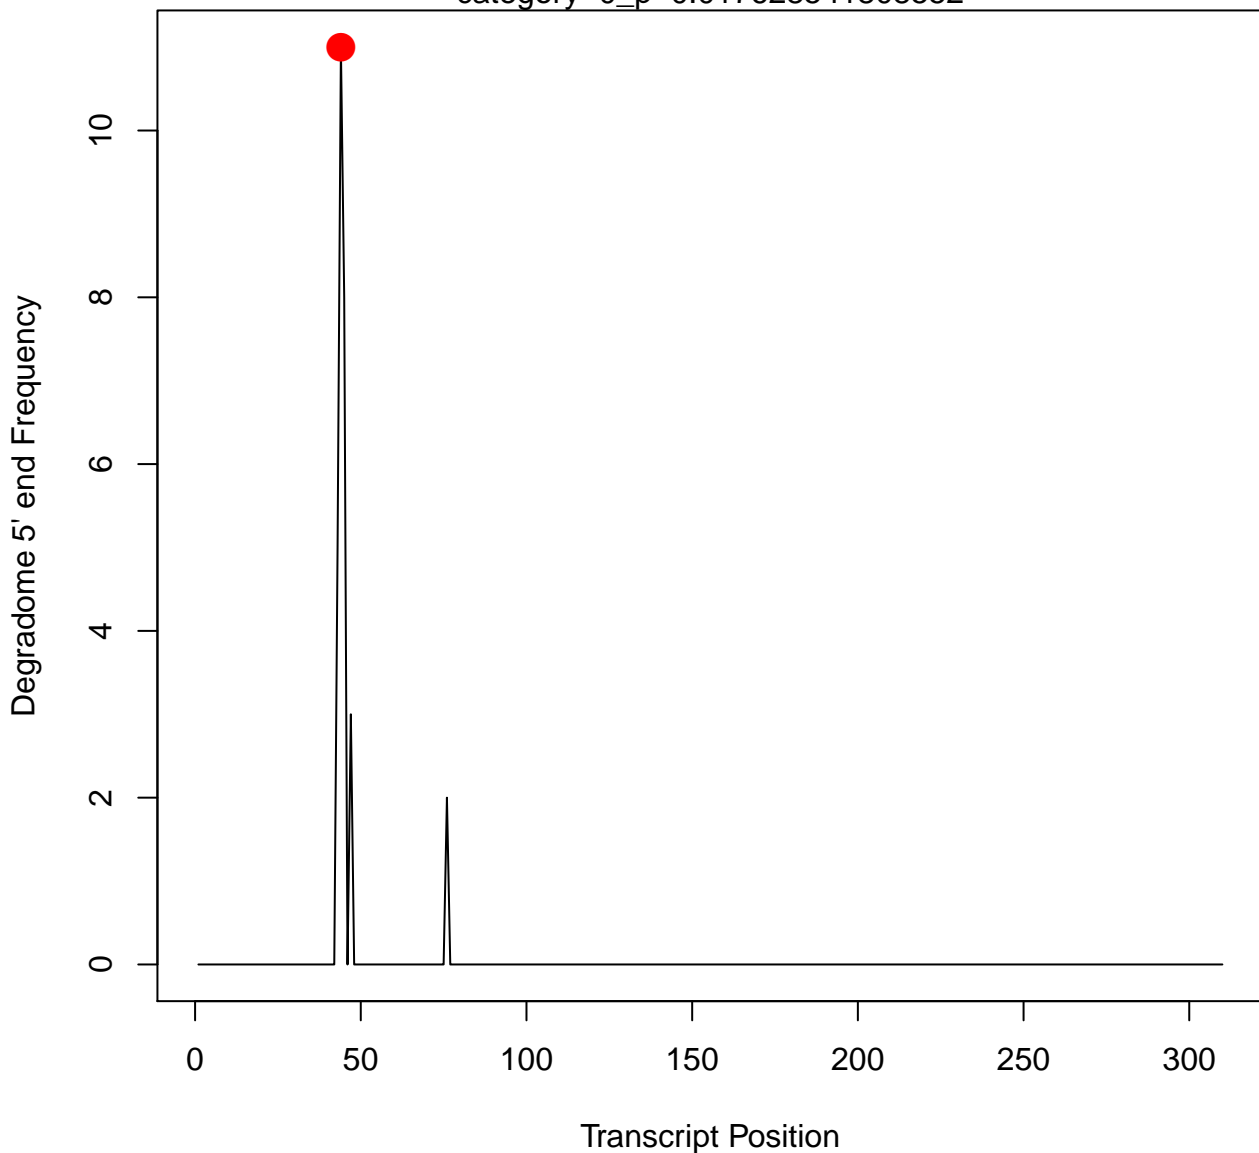

Supplement: s1 [file s1]

**T=Cluster-18410.65826\_Q=novel\_174\_S=394**

category=0\_p=0.00436846732795781

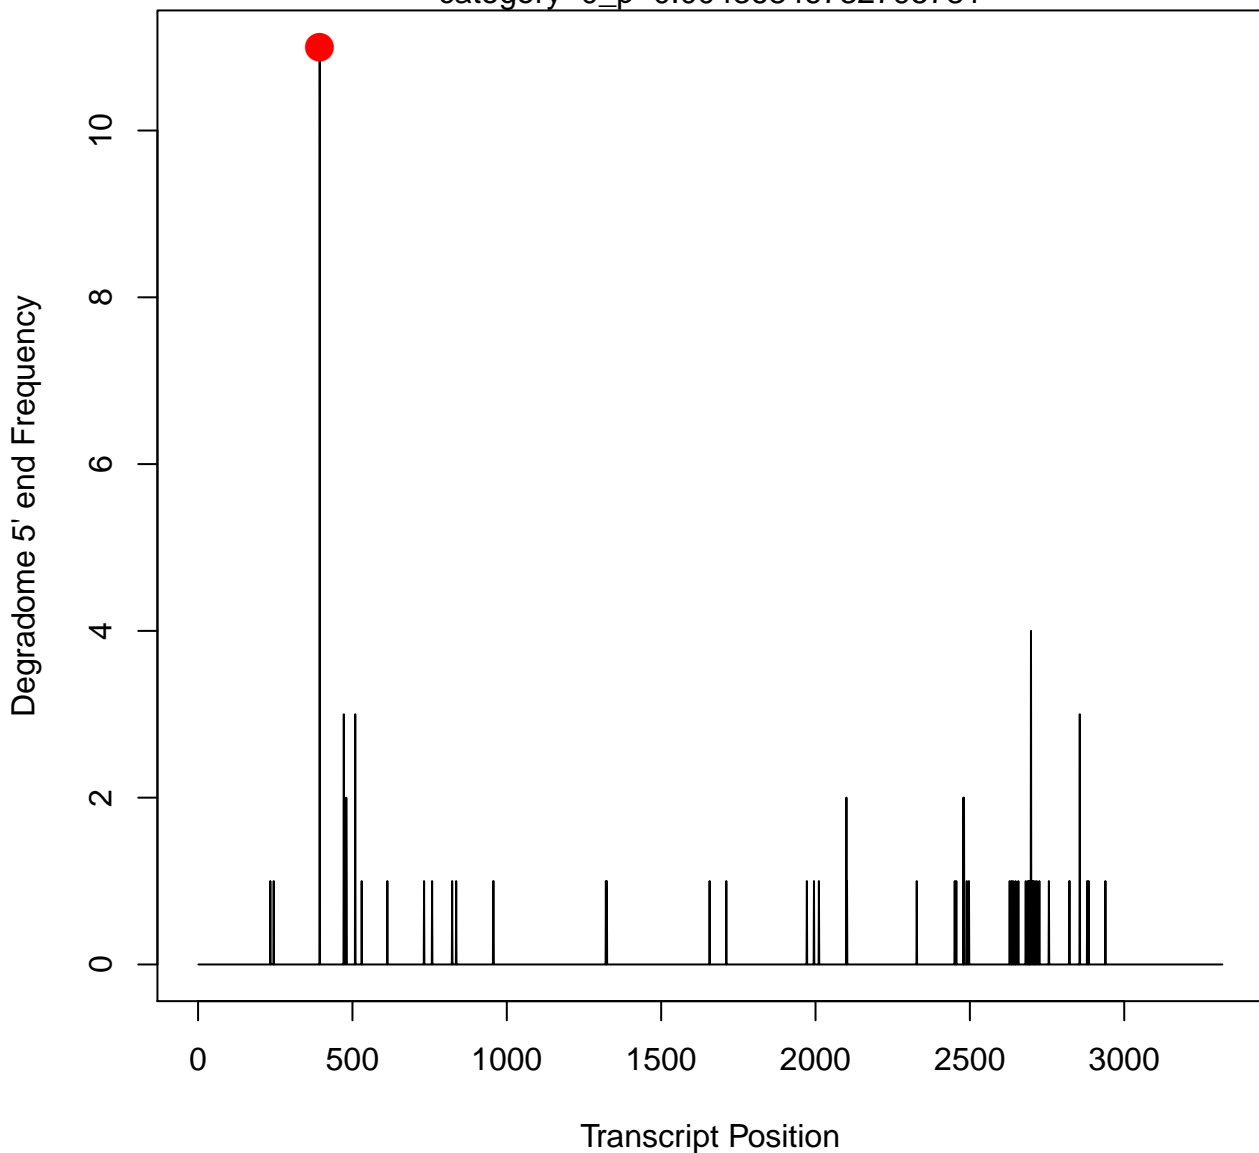

Supplement: s1 [file s1]

**T=Cluster-18410.50423\_Q=pma-miR319\_S=1187**

category=1\_p=0.0498741965913232

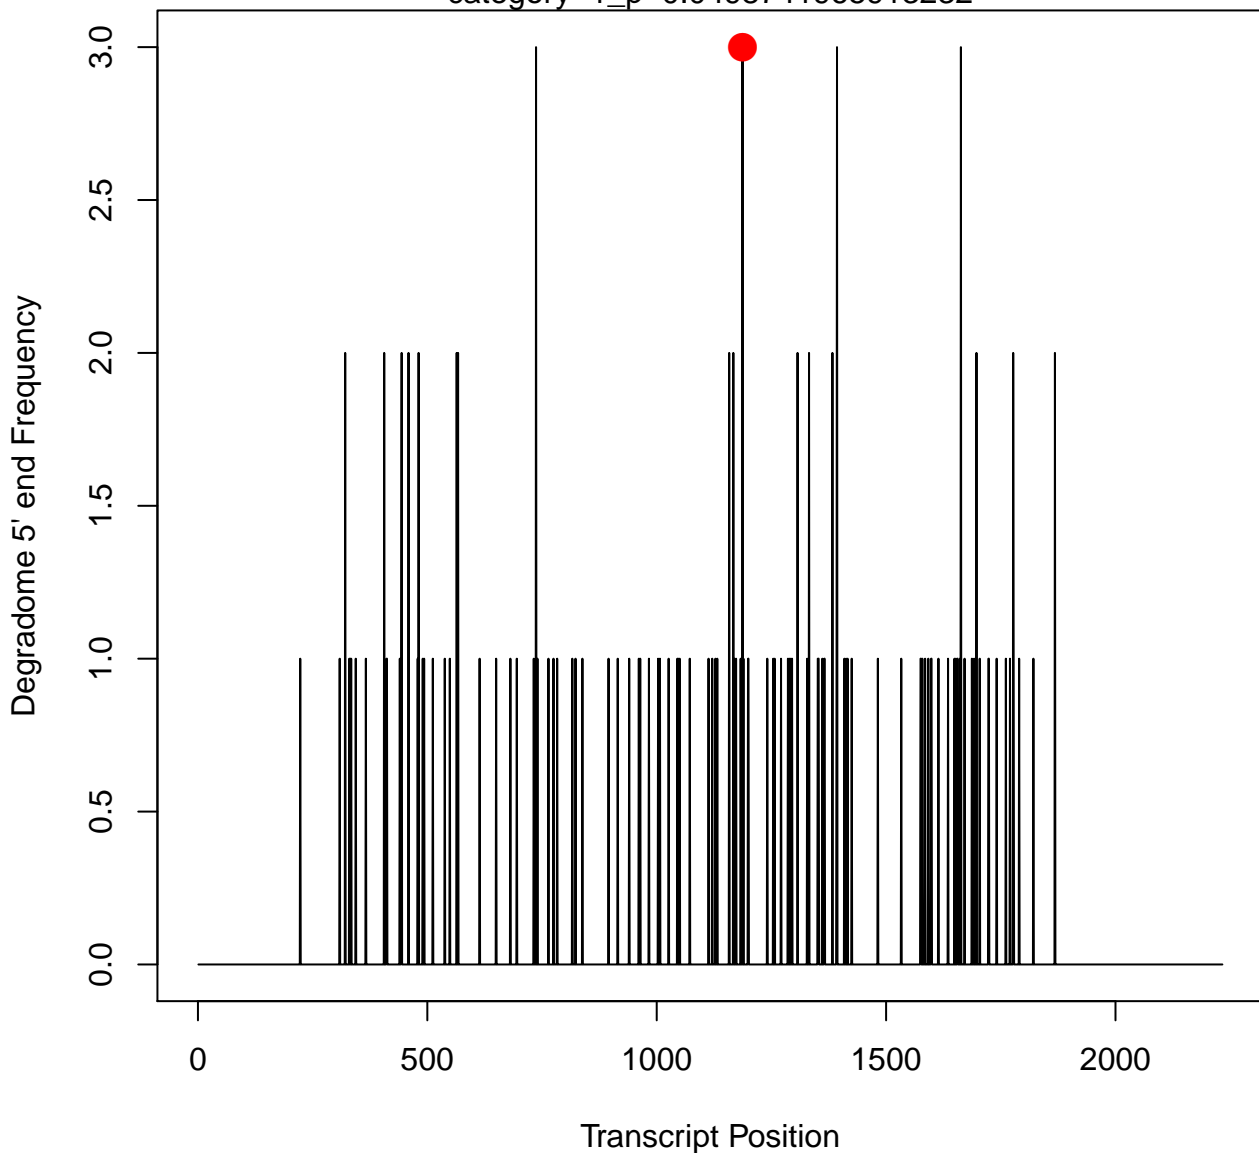

Supplement: s1 [file s1]

**T=Cluster-18410.42770\_Q=novel\_184\_S=700**

category=4\_p=0.0715786587755043

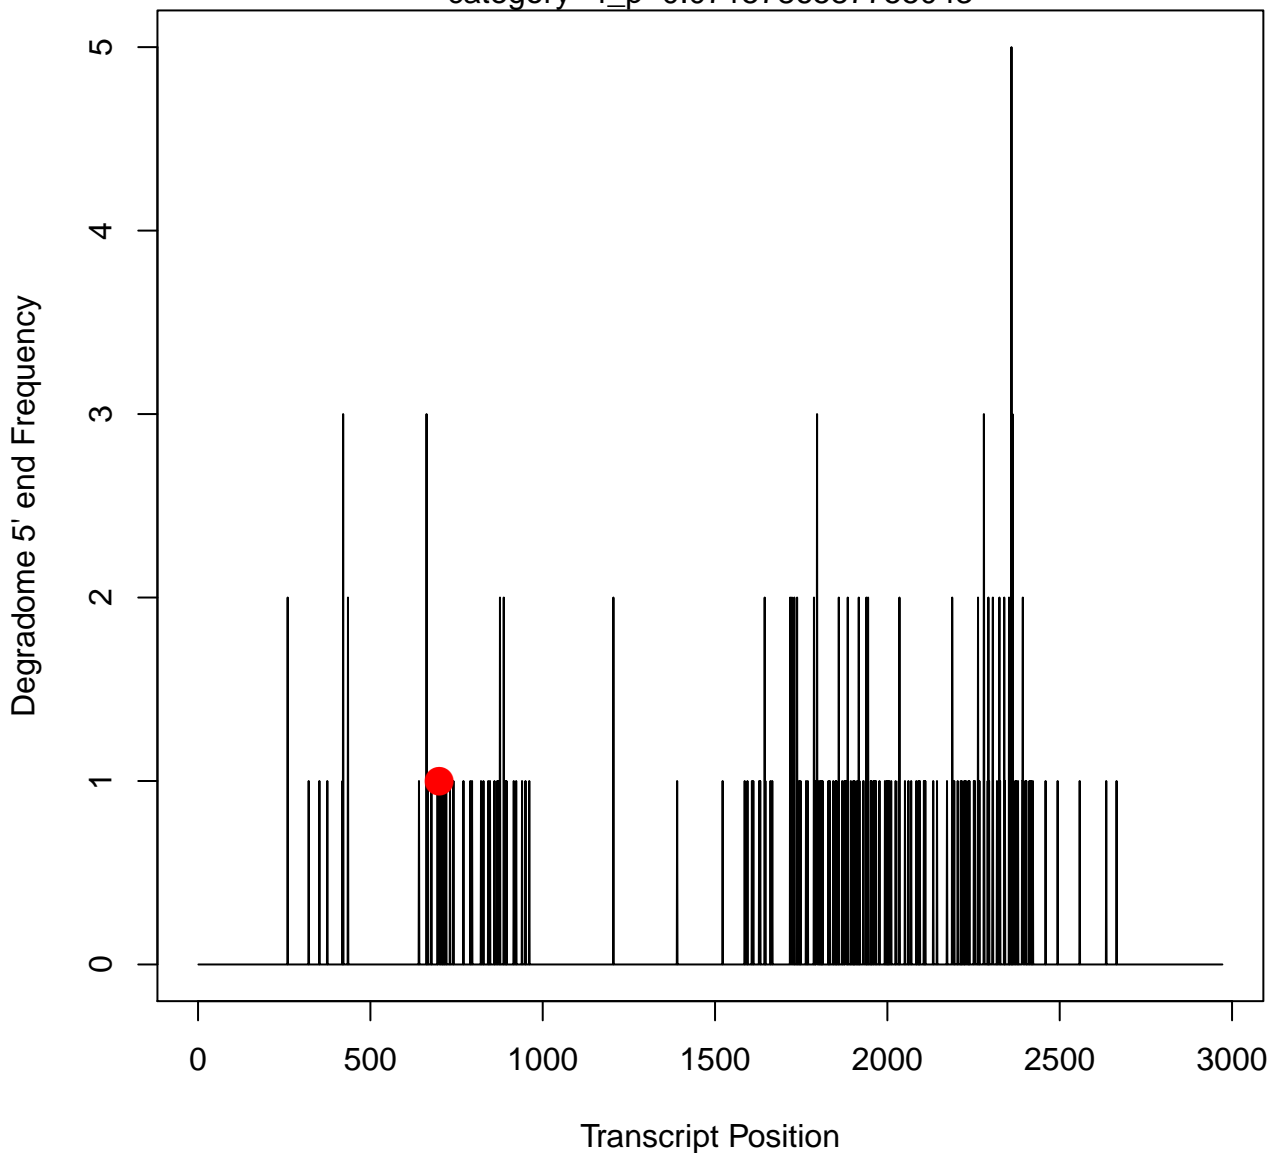

Supplement: s1 [file s1]

**T=Cluster-18410.7533\_Q=novel\_168\_S=954**

category=0\_p=0.0227225581783234

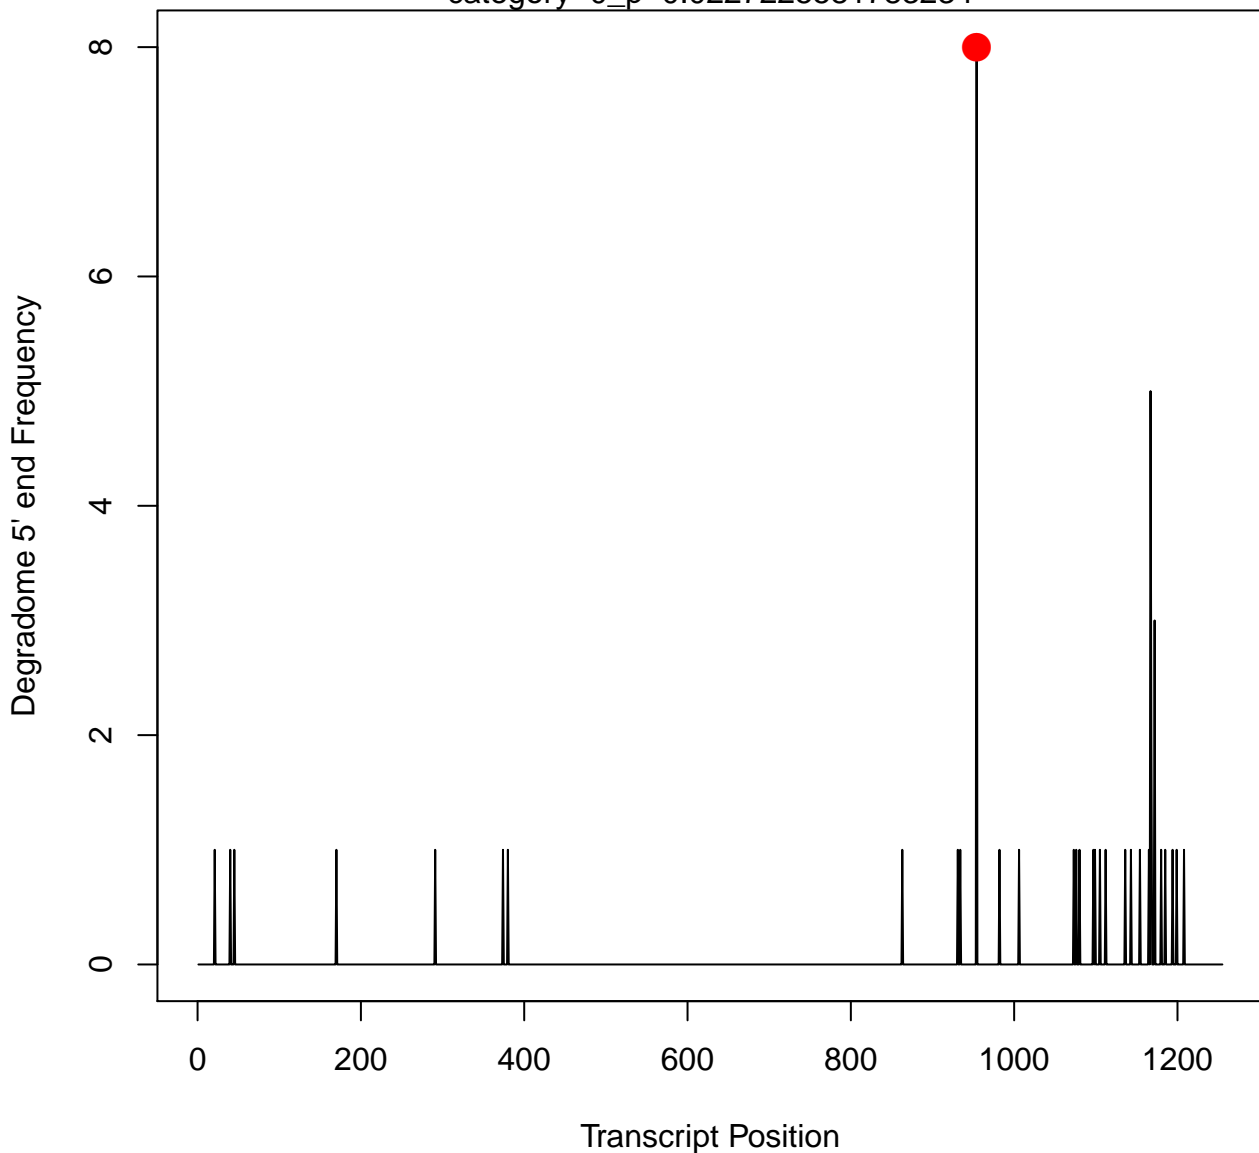

Supplement: s1 [file s1]

**T=Cluster-18410.65777\_Q=novel\_32\_S=925**

category=0\_p=0.00218662432695249

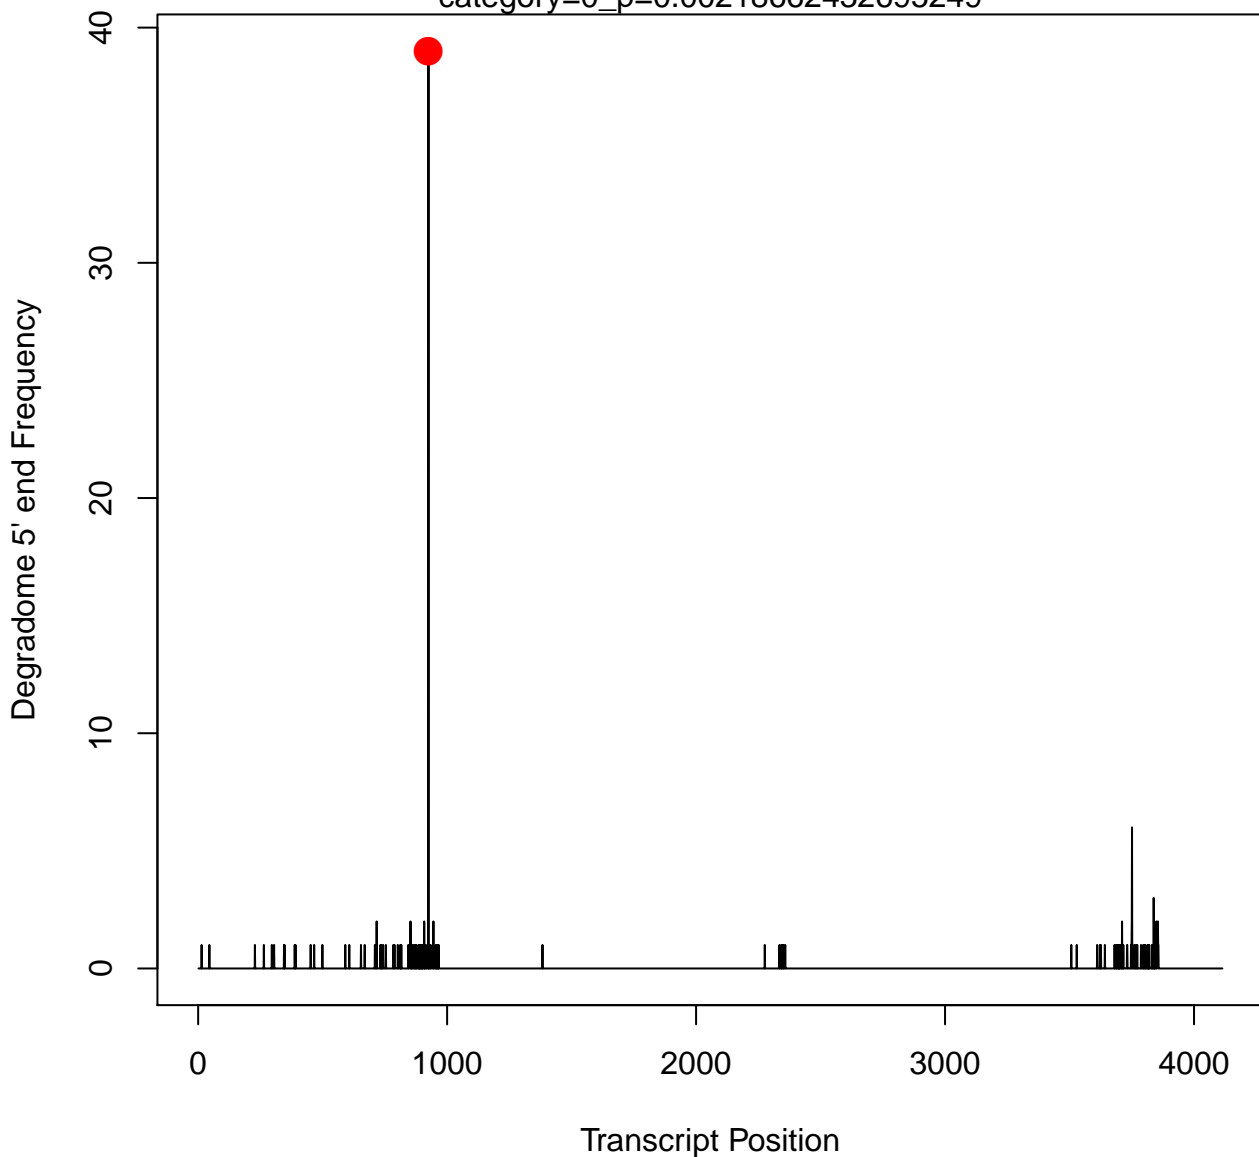

Supplement: s1 [file s1]

**T=Cluster-18410.69871\_Q=novel\_32\_S=925**

category=0\_p=0.0040959980740275

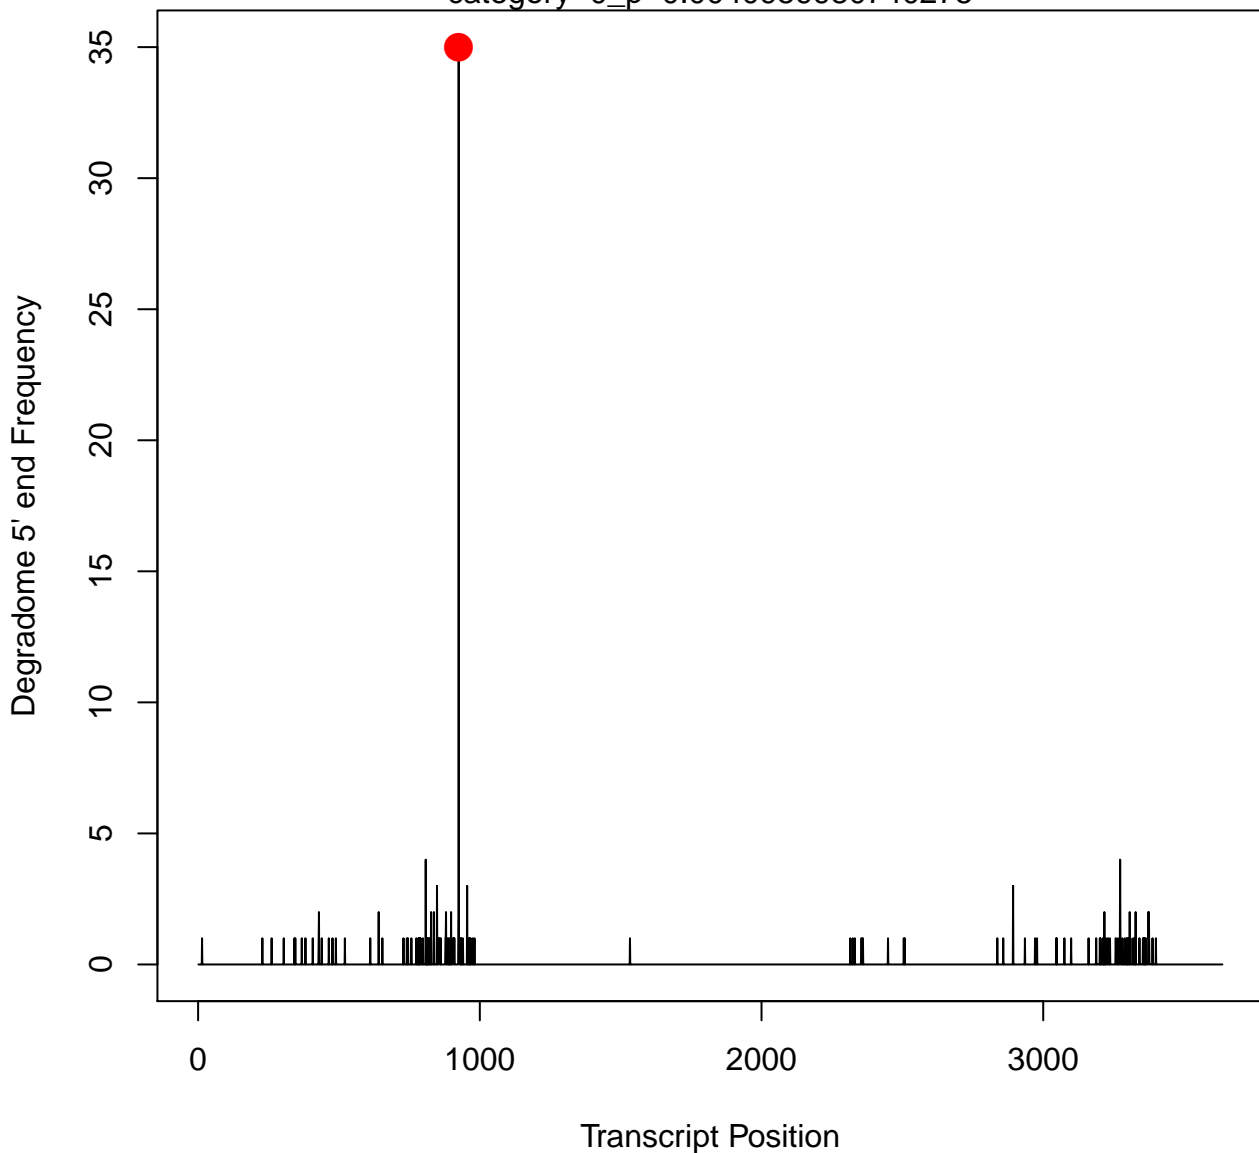

Supplement: s1 [file s1]

**T=Cluster-18410.43310\_Q=pma-miR946a-3p\_S=239**

category=0\_p=0.0362657405652345

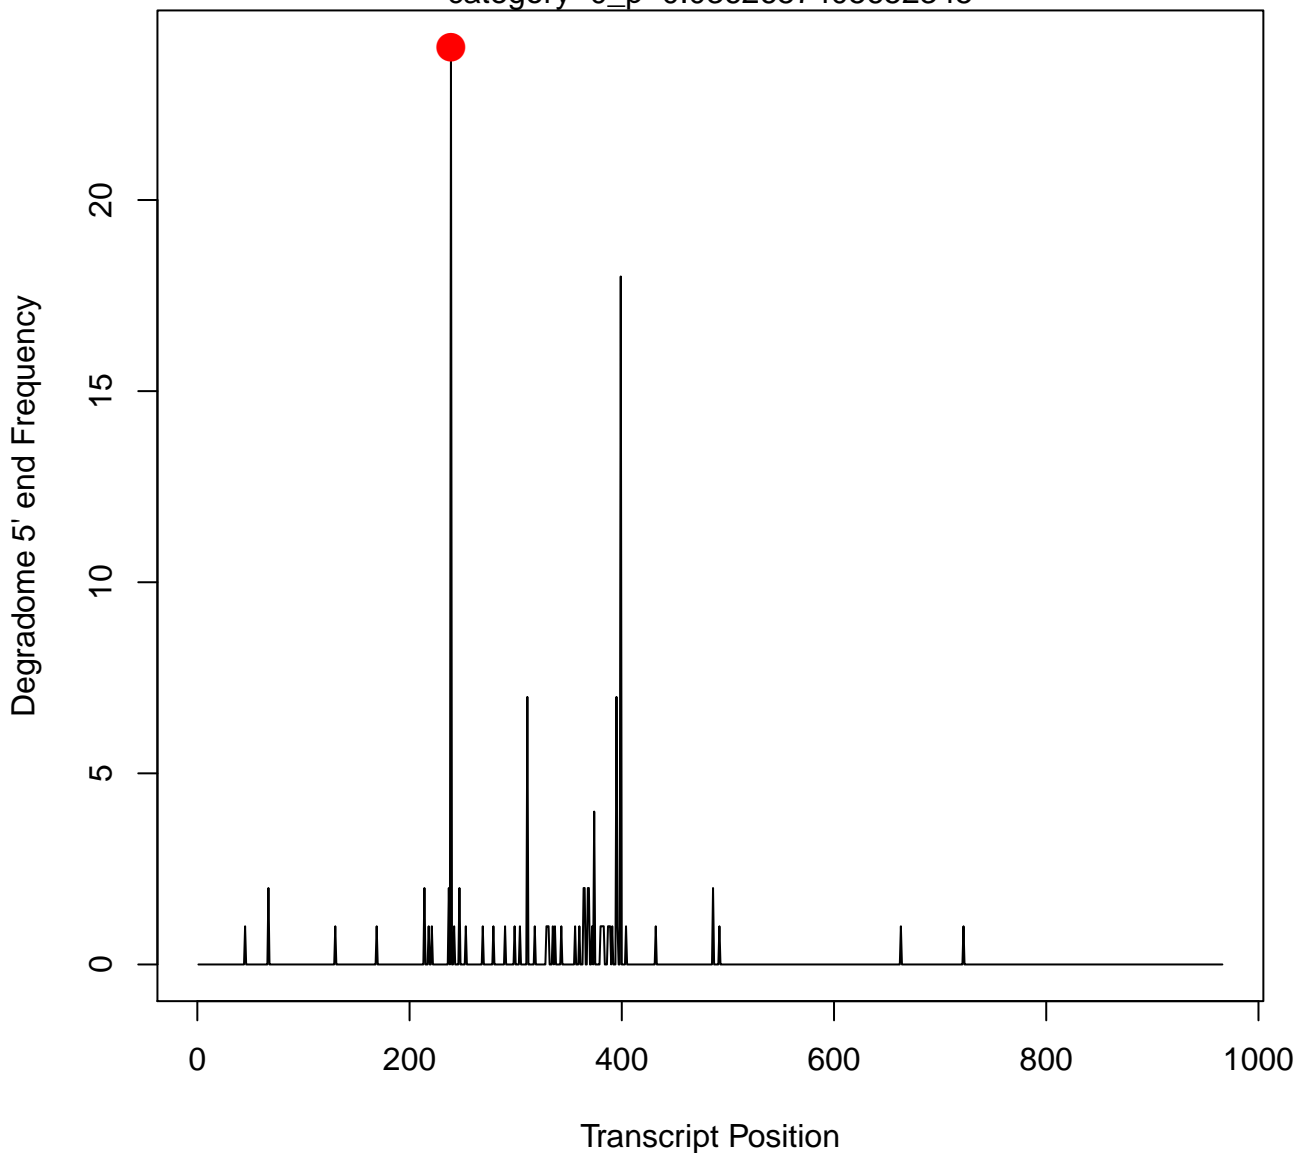

Supplement: s1 [file s1]

**T=Cluster-18410.6576\_Q=novel\_41\_S=95**

category=0\_p=0.00218662432695249

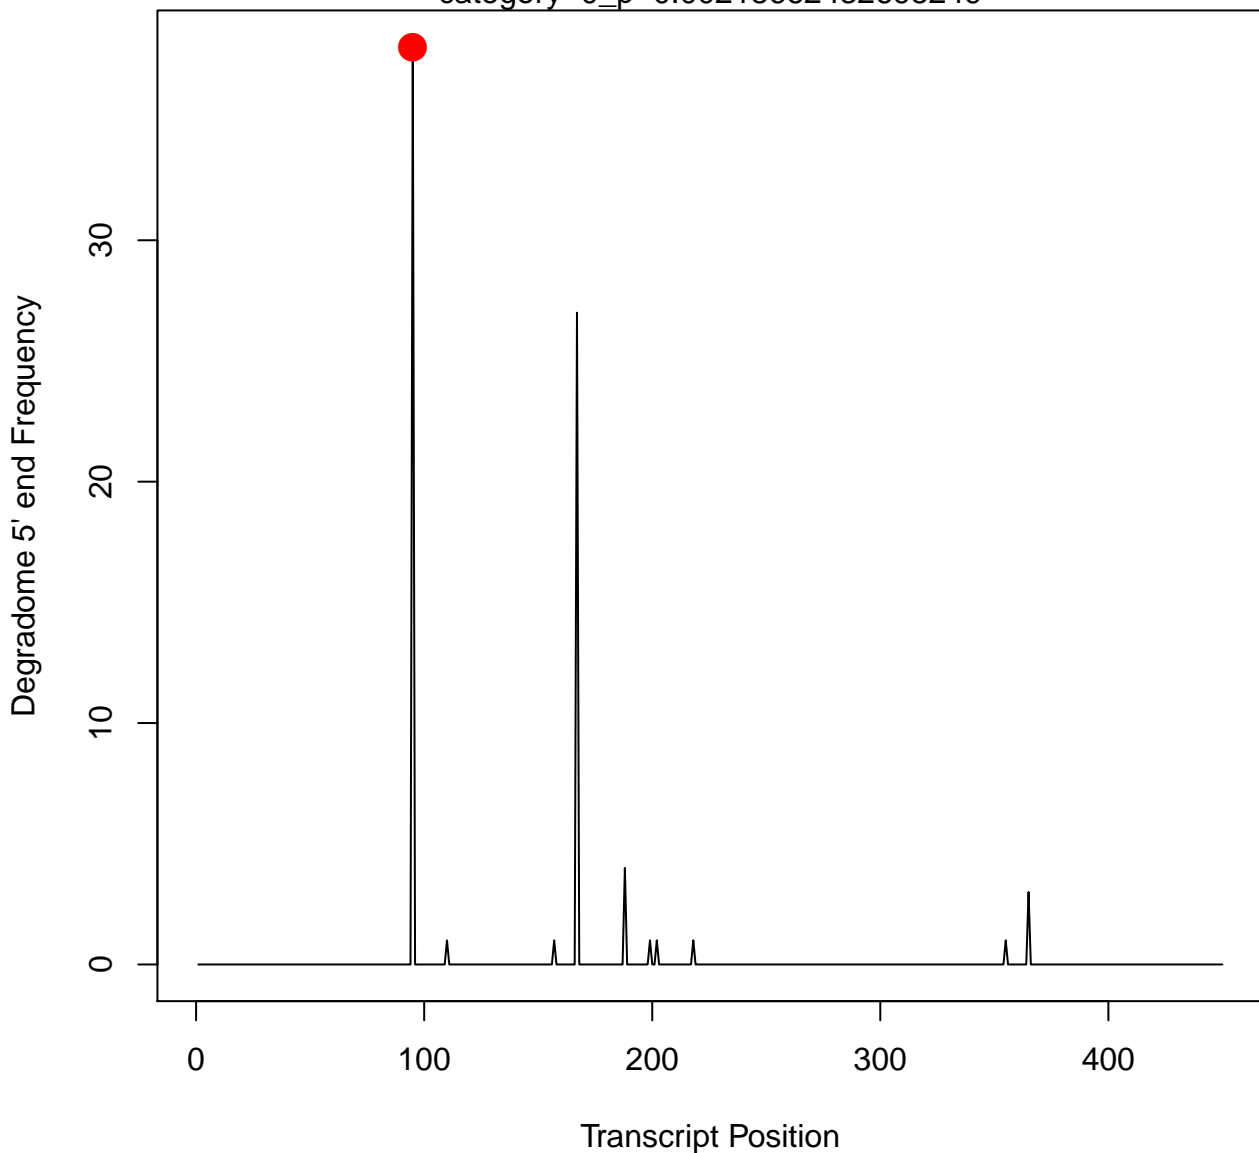

Supplement: s1 [file s1]

**T=Cluster-18410.101469\_Q=novel\_172\_S=364**

category=0\_p=0.005185427902343

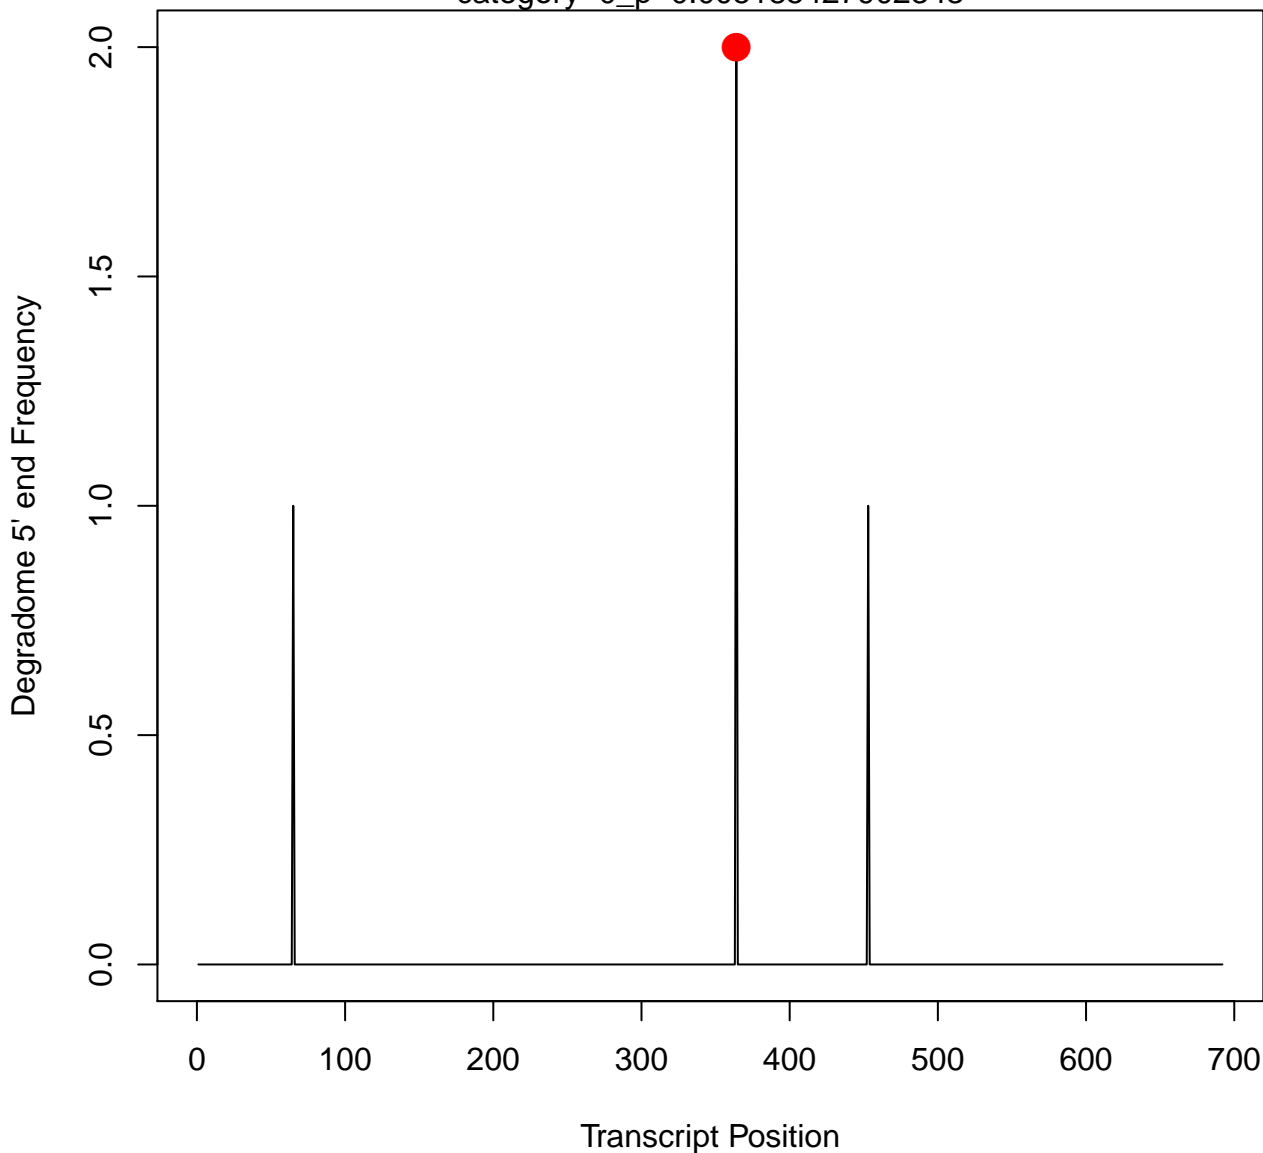

Supplement: s1 [file s1]

**T=Cluster-18410.77894\_Q=pma-miR482a\_S=128**

category=0\_p=0.0285879019128199

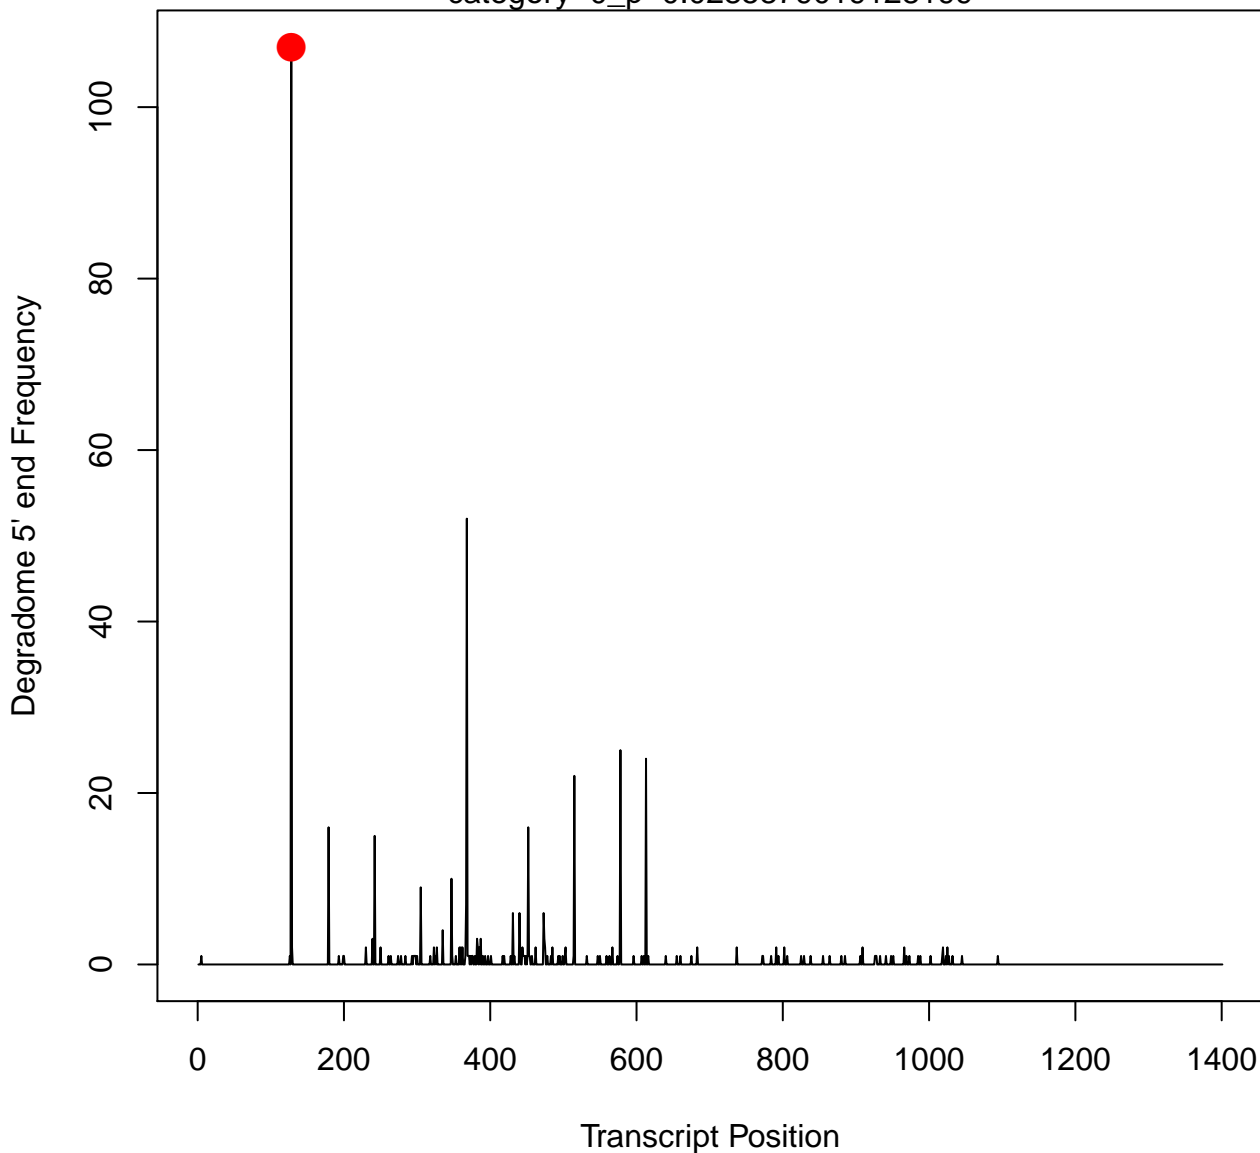

Supplement: s1 [file s1]

**T=Cluster-18410.65112\_Q=novel\_184\_S=700**

category=4\_p=0.0483072886549676

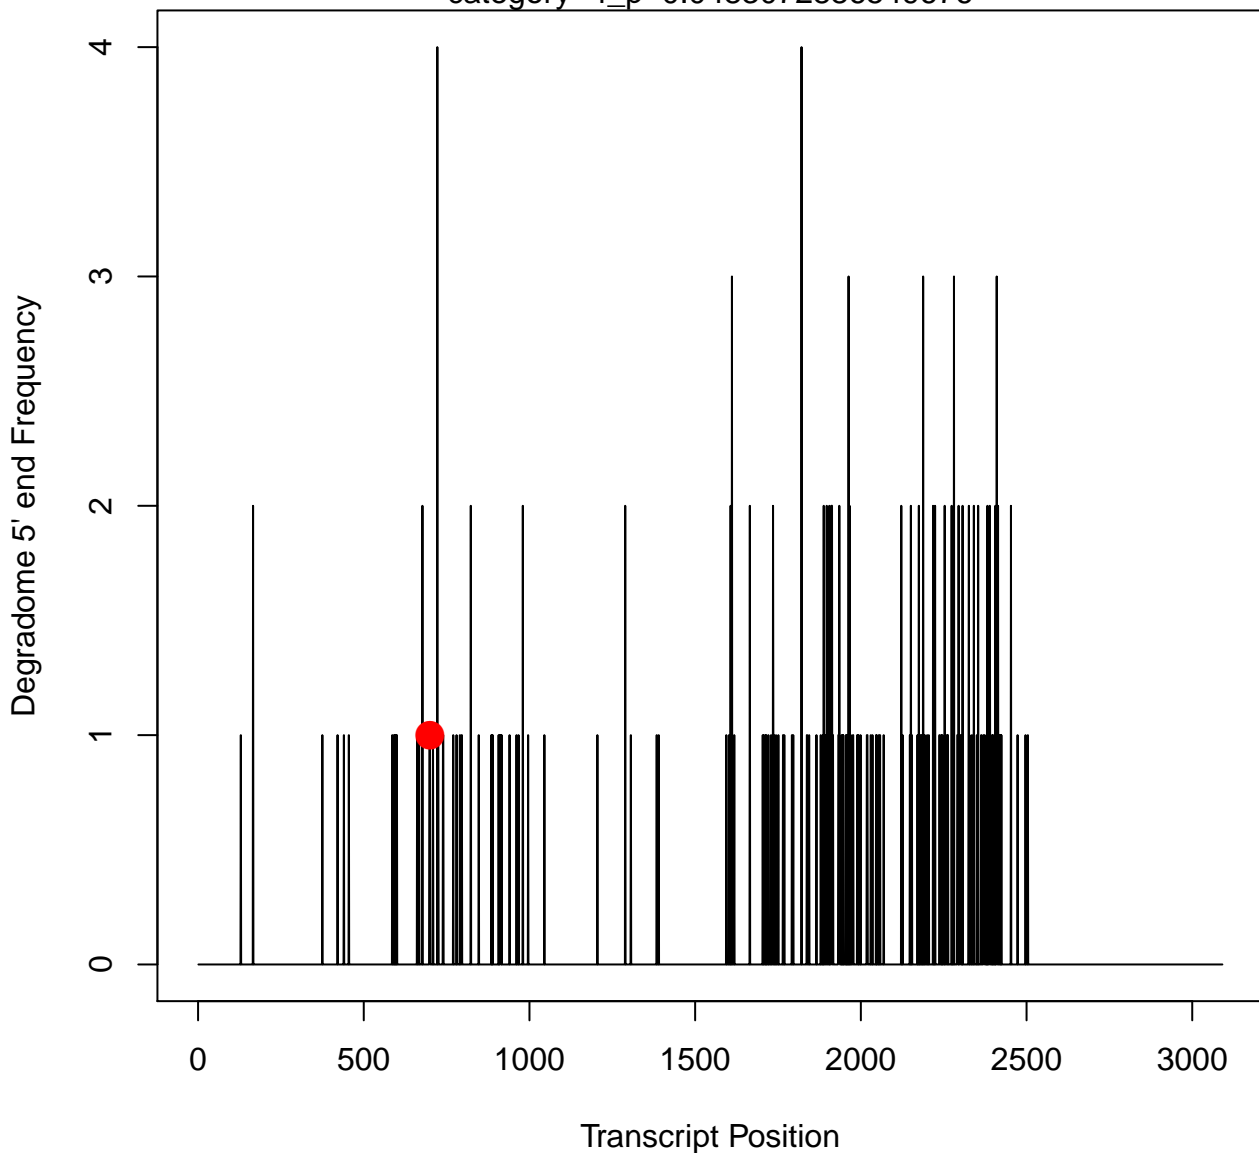

Supplement: s1 [file s1]

**T=Cluster-18410.101487\_Q=novel\_114\_S=145**

category=4\_p=0.024452609380235

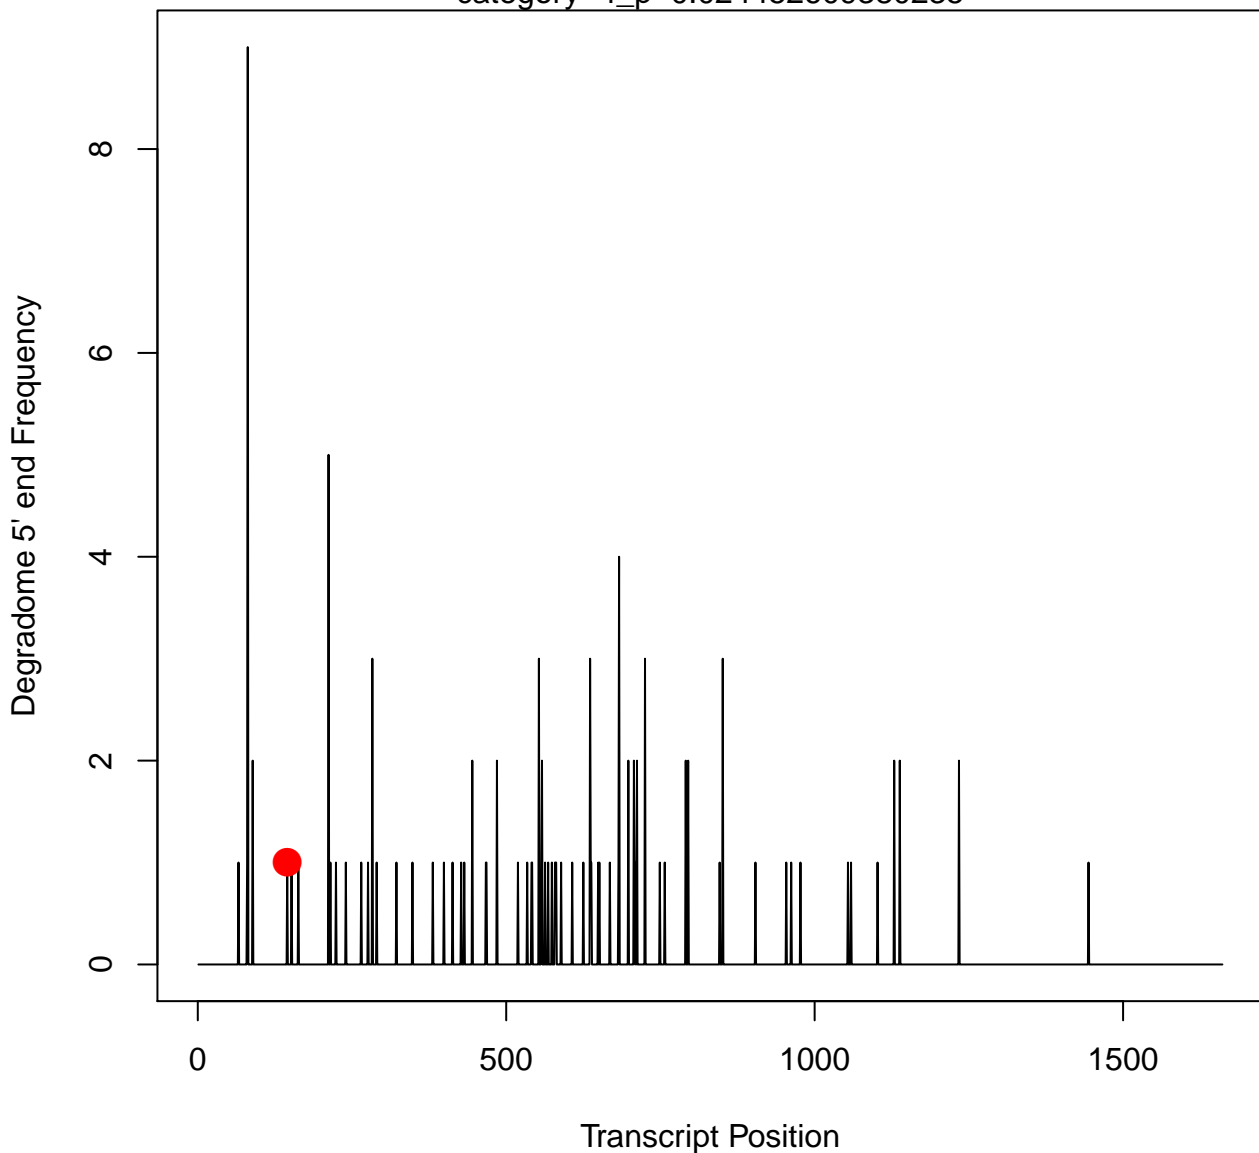

Supplement: s1 [file s1]

**T=Cluster-18410.118021\_Q=novel\_74\_S=468**

category=0\_p=0.0125079730989179

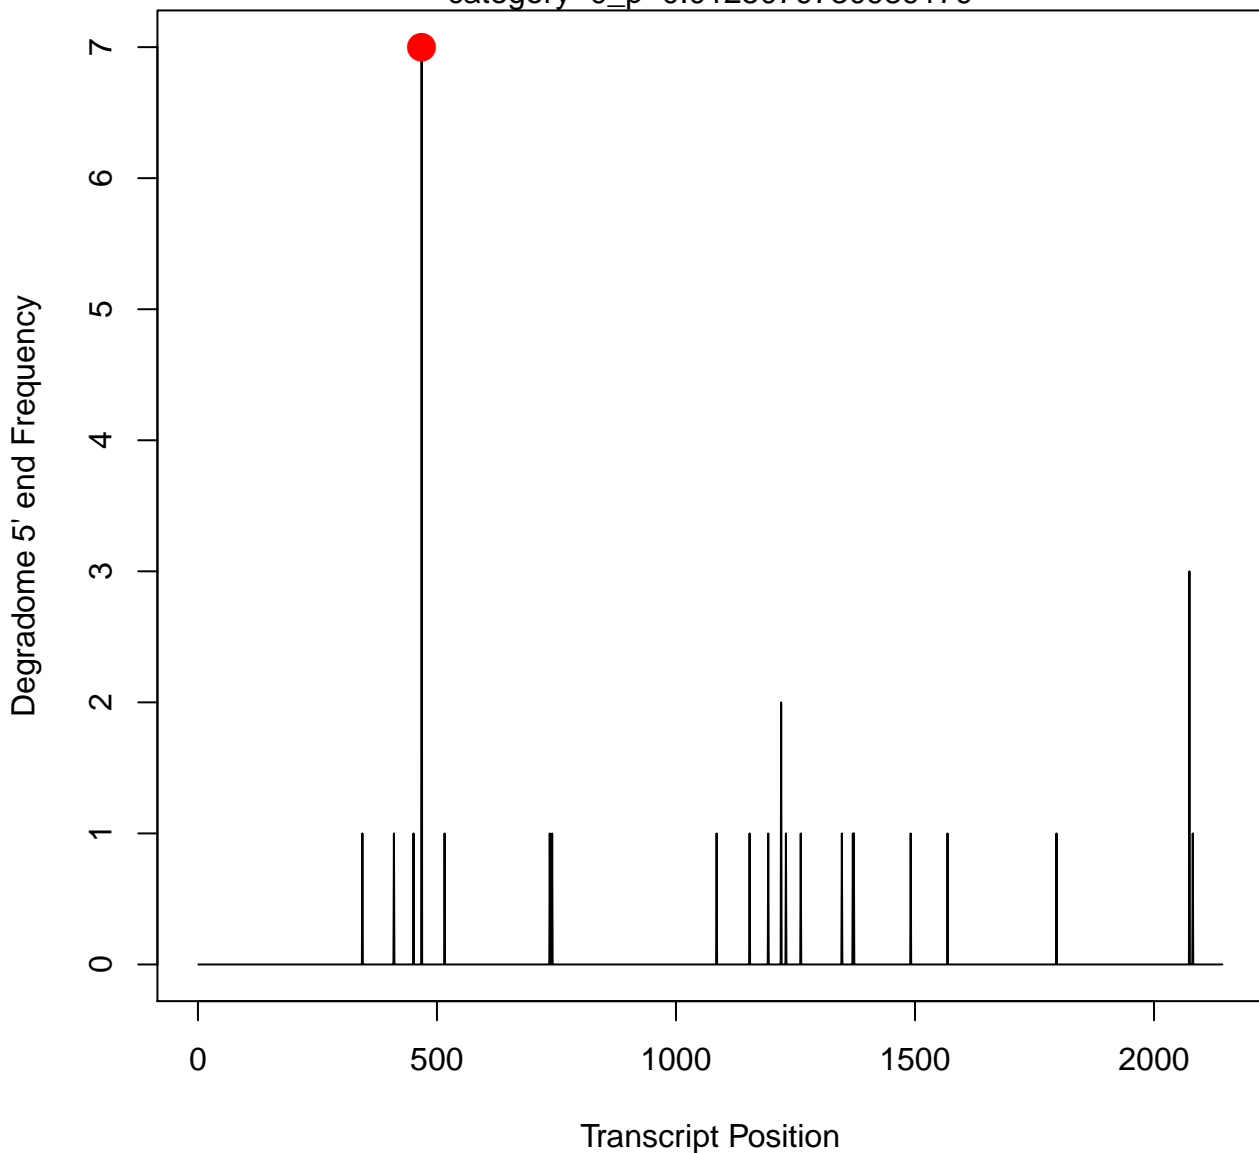

Supplement: s1 [file s1]

**T=Cluster-18410.81208\_Q=novel\_197\_S=126**

category=0\_p=0.00436846732795781

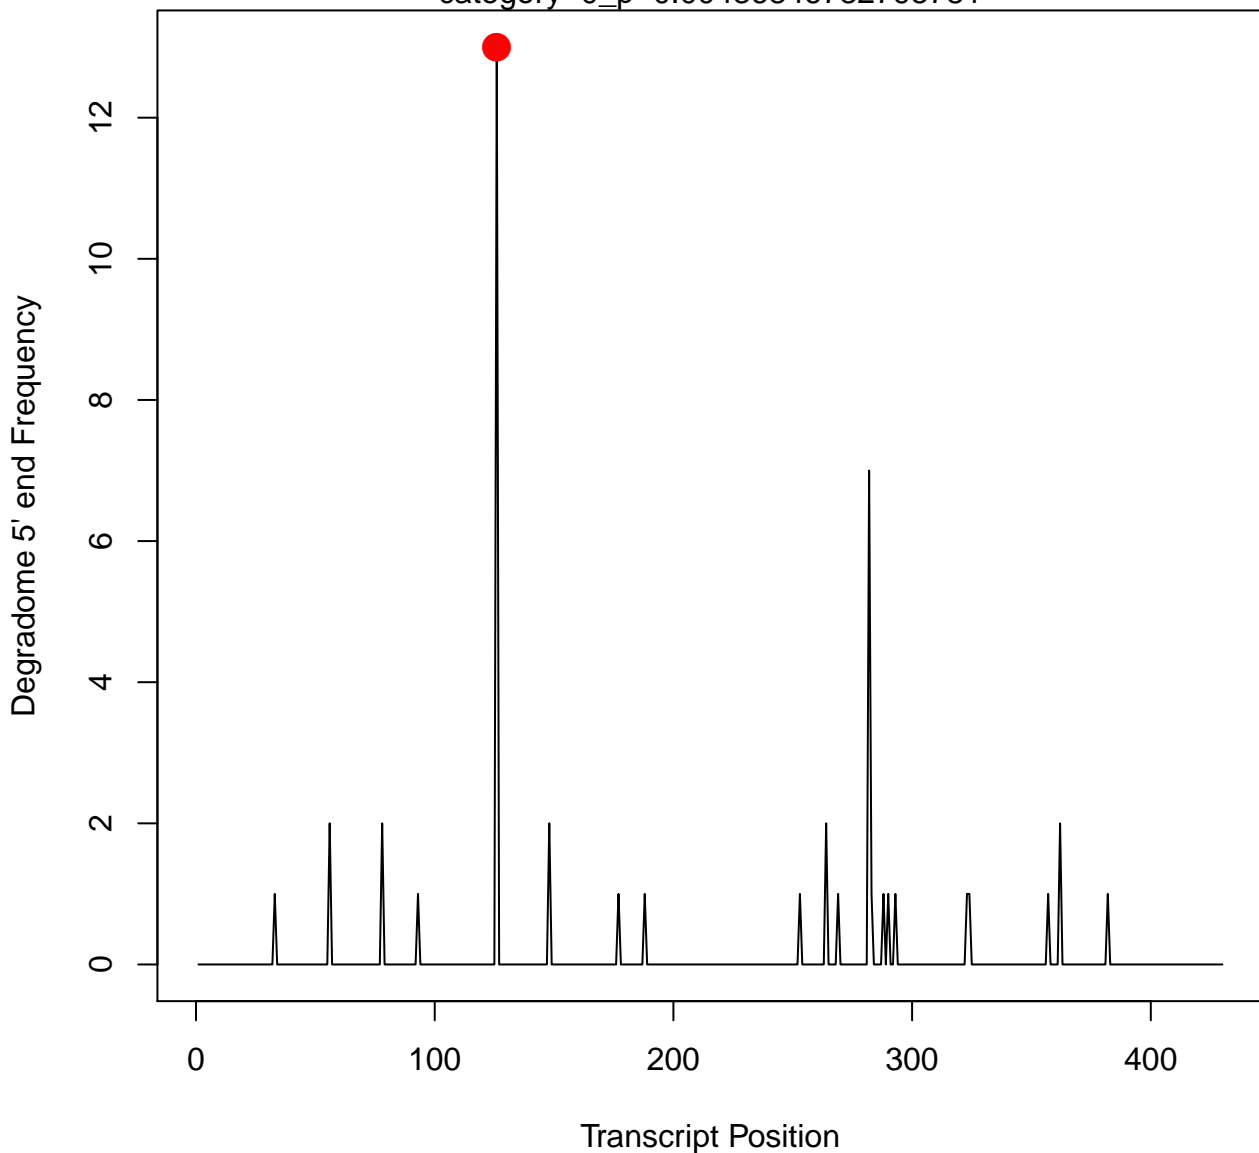

Supplement: s1 [file s1]

**T=Cluster-18410.9971\_Q=novel\_80\_S=413**

category=0\_p=0.0237916122172683

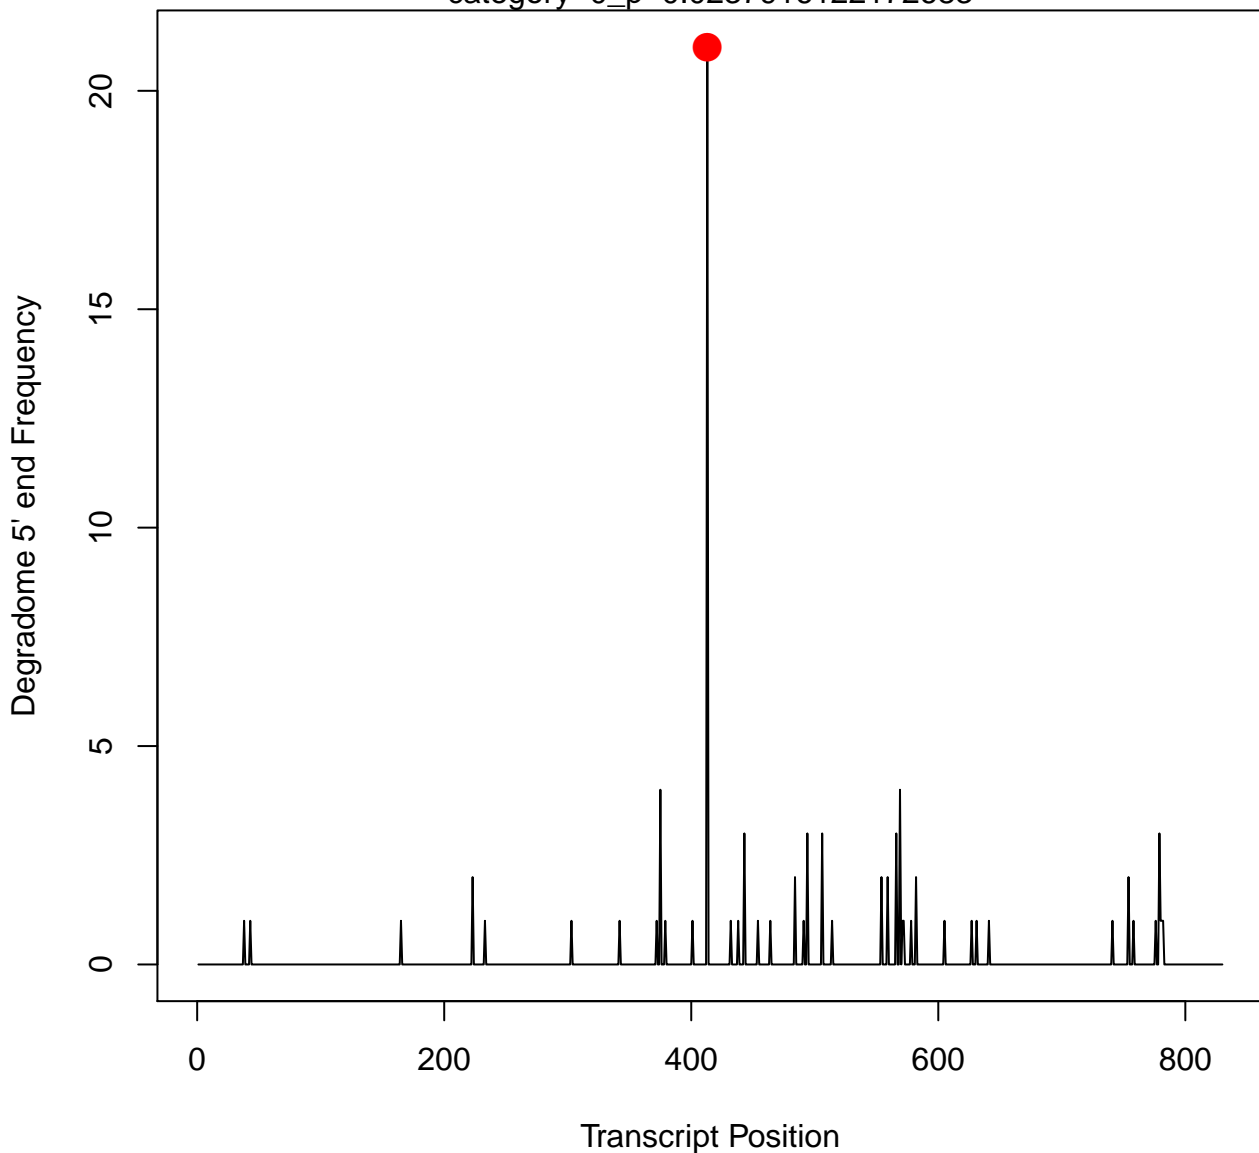

Supplement: s1 [file s1]

**T=Cluster-18410.87244\_Q=novel\_65\_S=826**

category=0\_p=0.00136720107825572

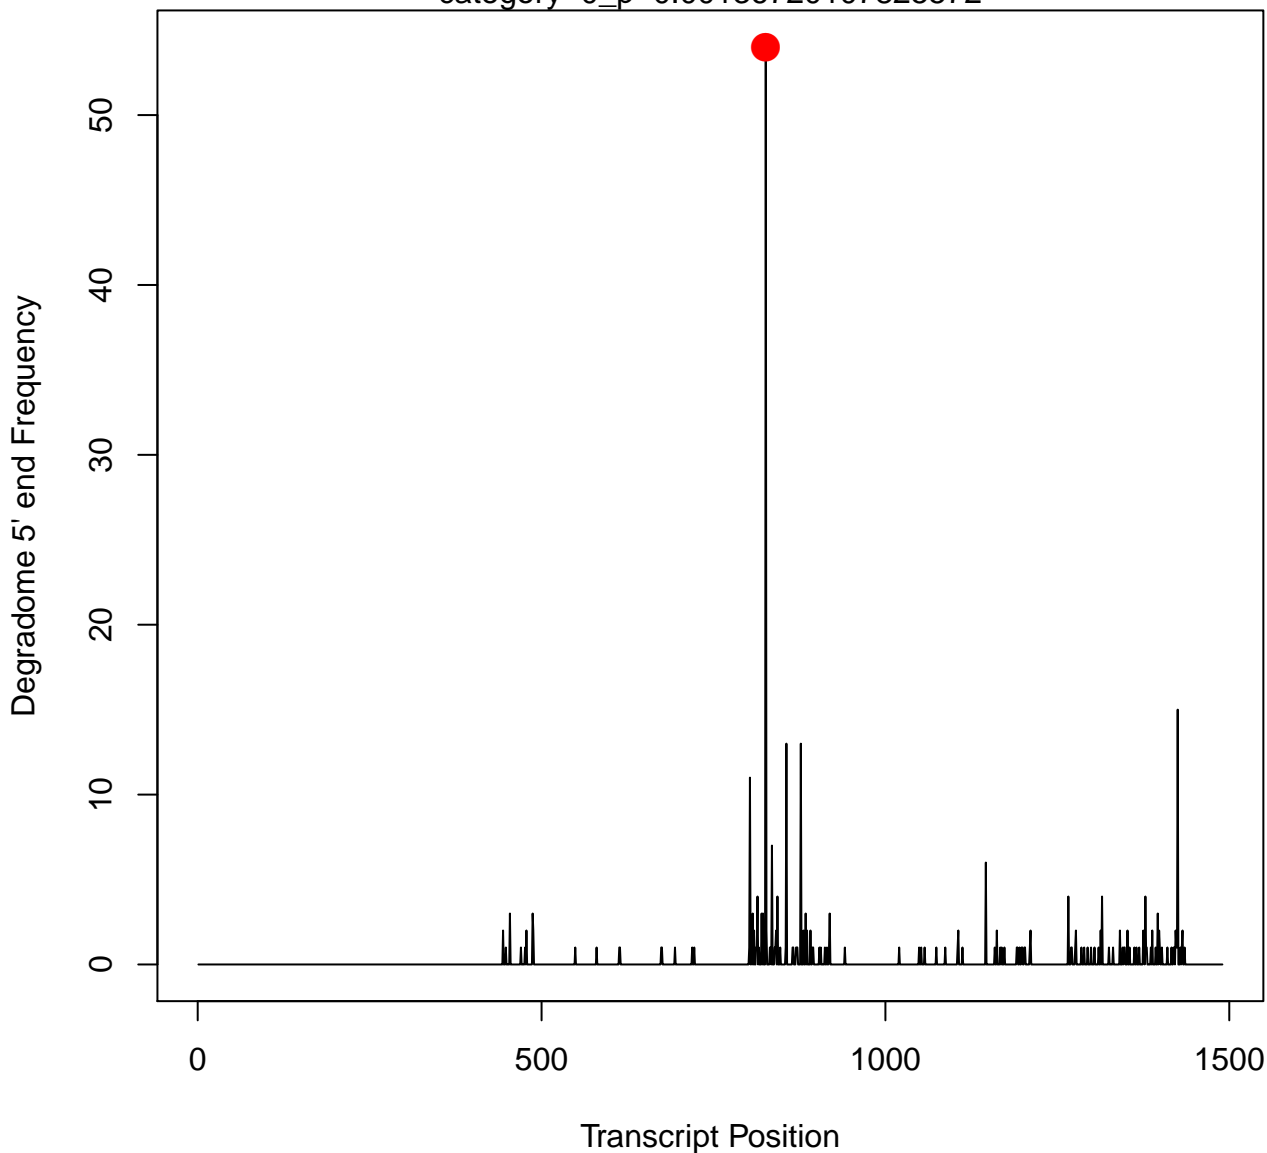

Supplement: s1 [file s1]

**T=Cluster-18410.113160\_Q=novel\_74\_S=518**

category=0\_p=0.00109391048354923

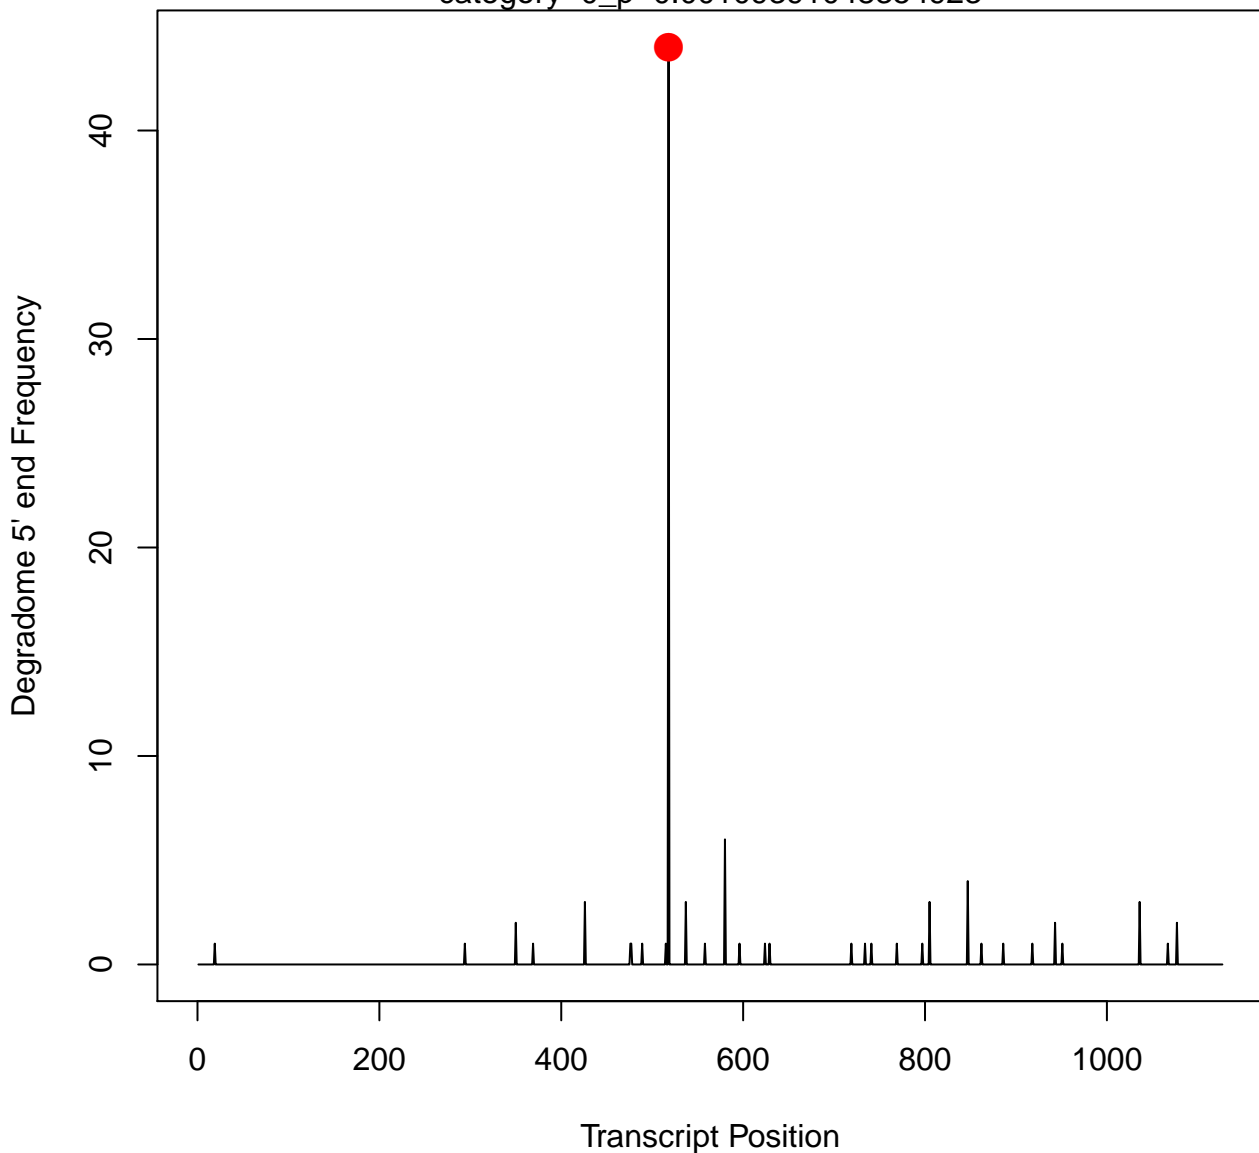

Supplement: s1 [file s1]

**T=Cluster-18410.35910\_Q=pma-miR482a\_S=266**

category=0\_p=0.077800483762128

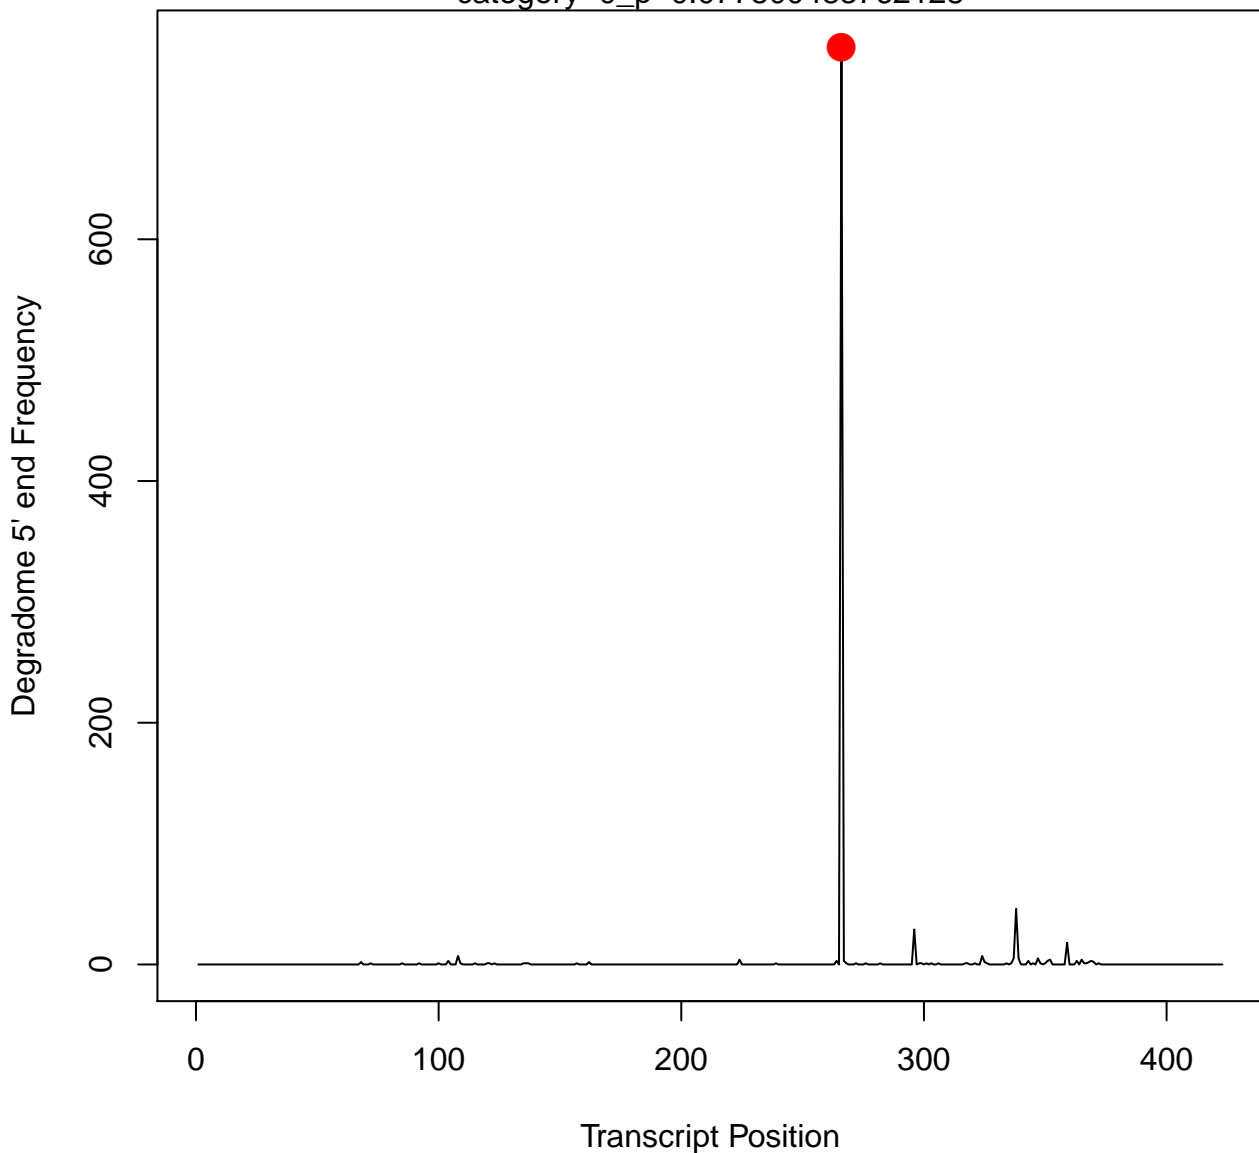

Supplement: s1 [file s1]

**T=Cluster-18410.98307\_Q=novel\_168\_S=849**

category=0\_p=0.0267254846978155

Degradome 5' end Frequency

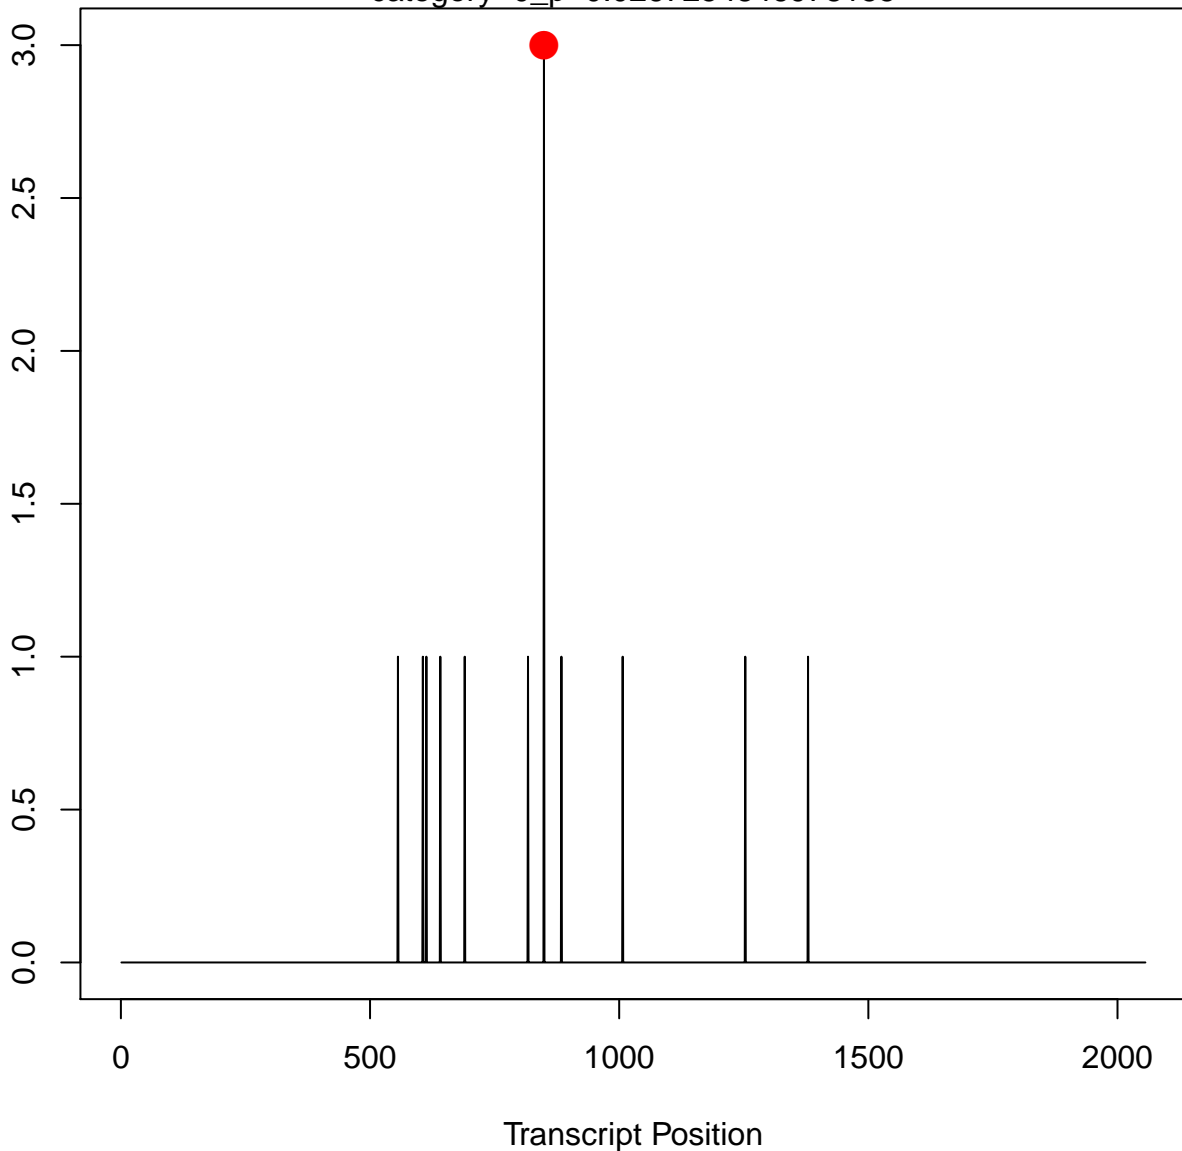

Supplement: s1 [file s1]

**T=Cluster-18410.49721\_Q=novel\_164\_S=132**

category=0\_p=0.0568748065622861

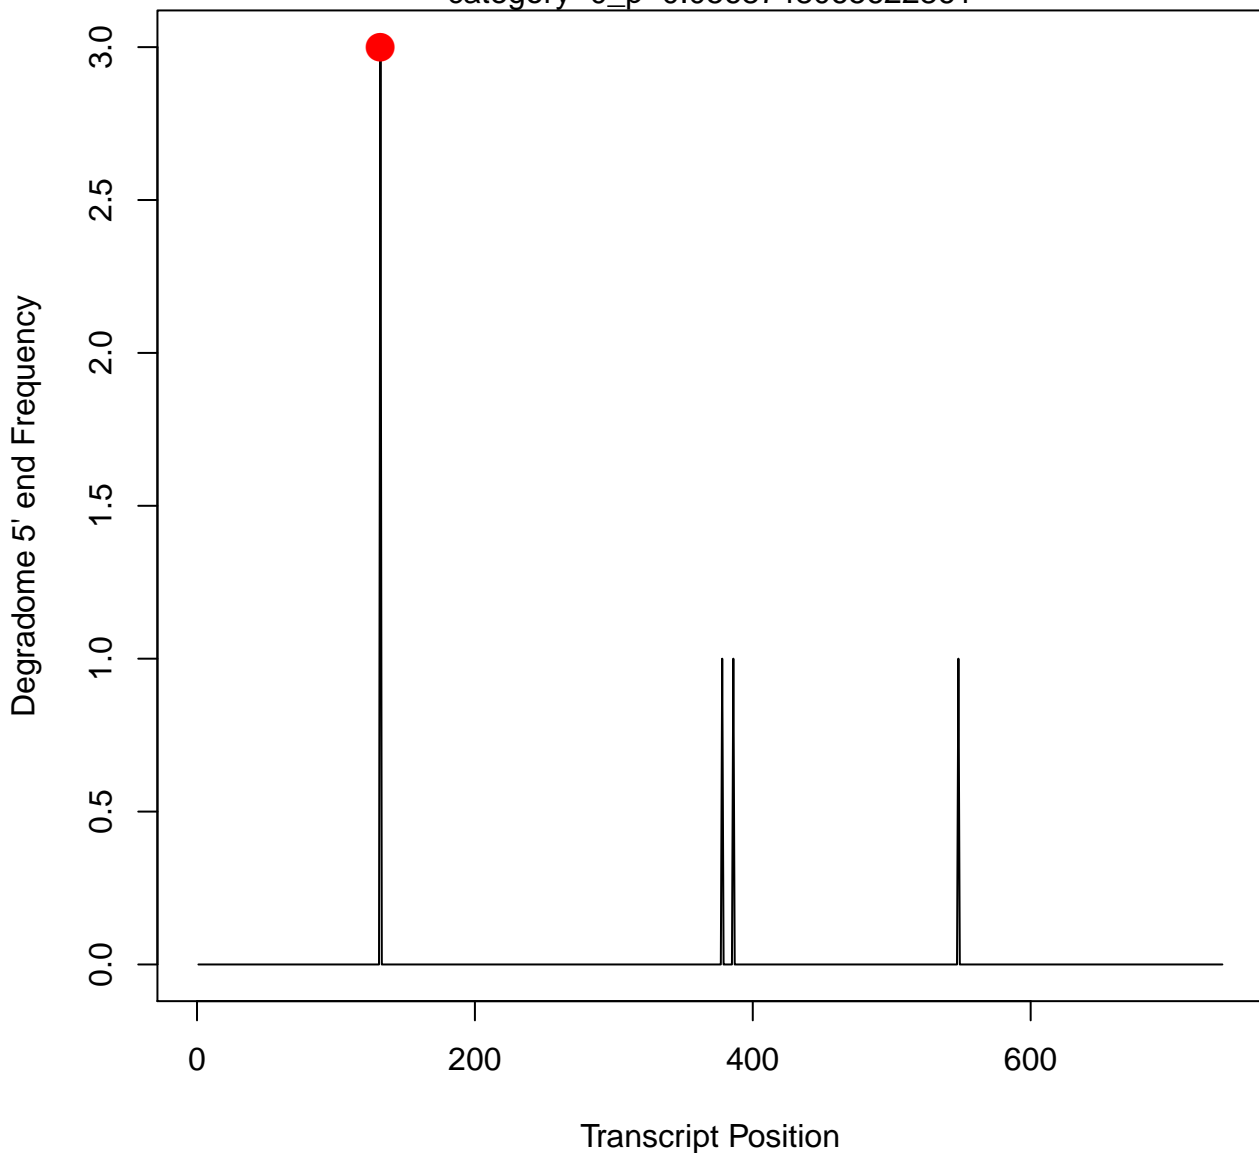

Supplement: s1 [file s1]

**T=Cluster-18410.110542\_Q=novel\_168\_S=431**

category=1\_p=0.0237344565580955

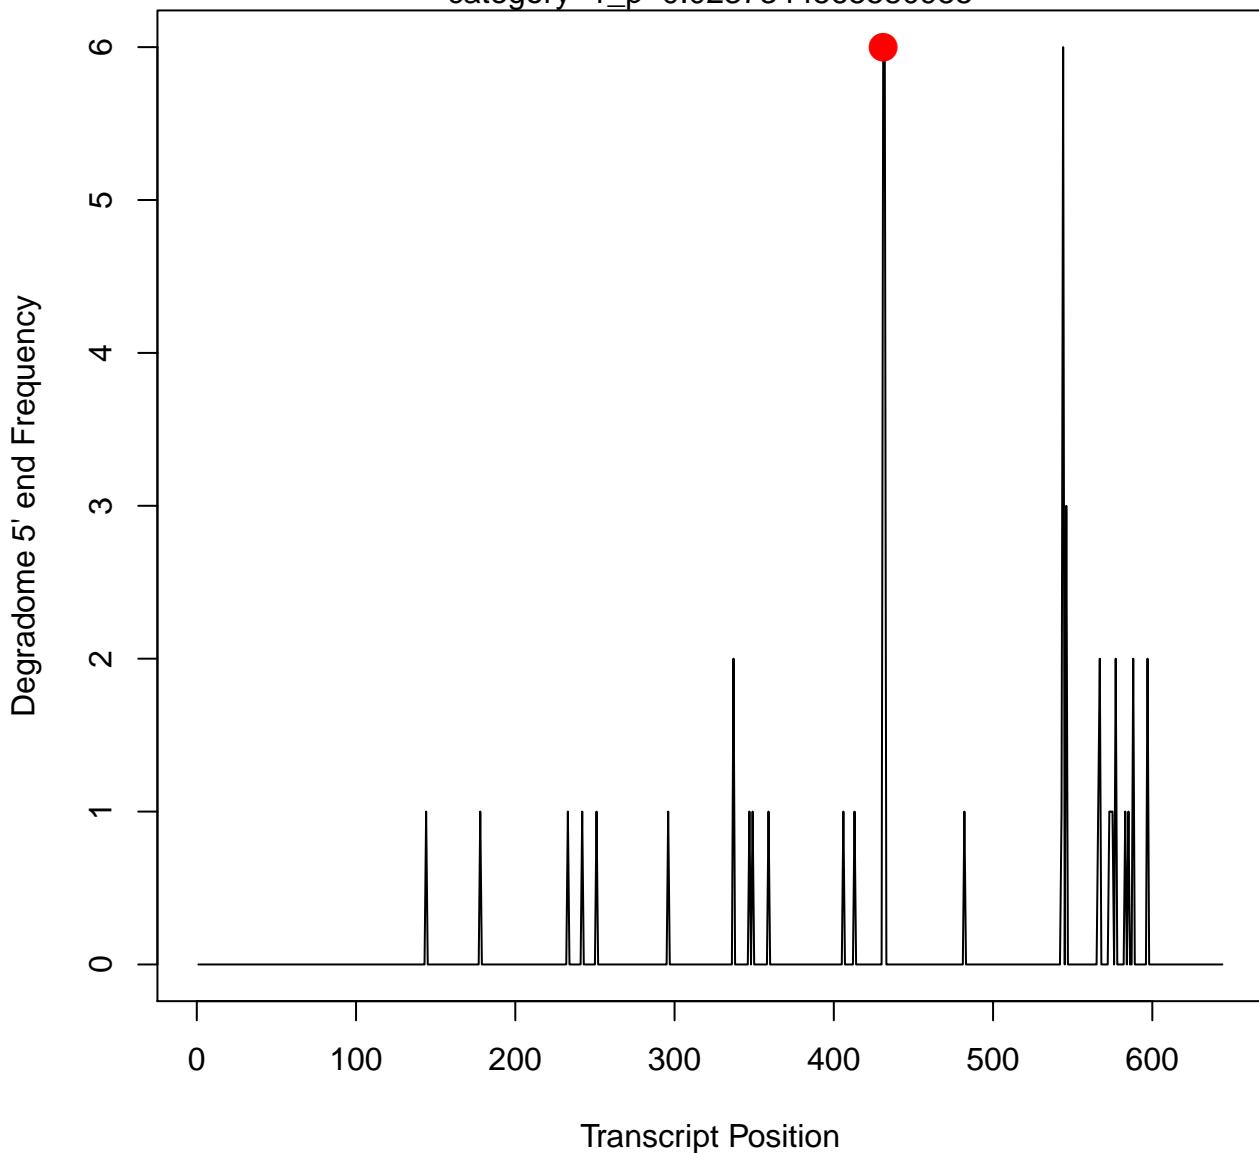

Supplement: s1 [file s1]

**T=Cluster-18410.89777\_Q=novel\_47\_S=209**

category=0\_p=0.00817521894783257

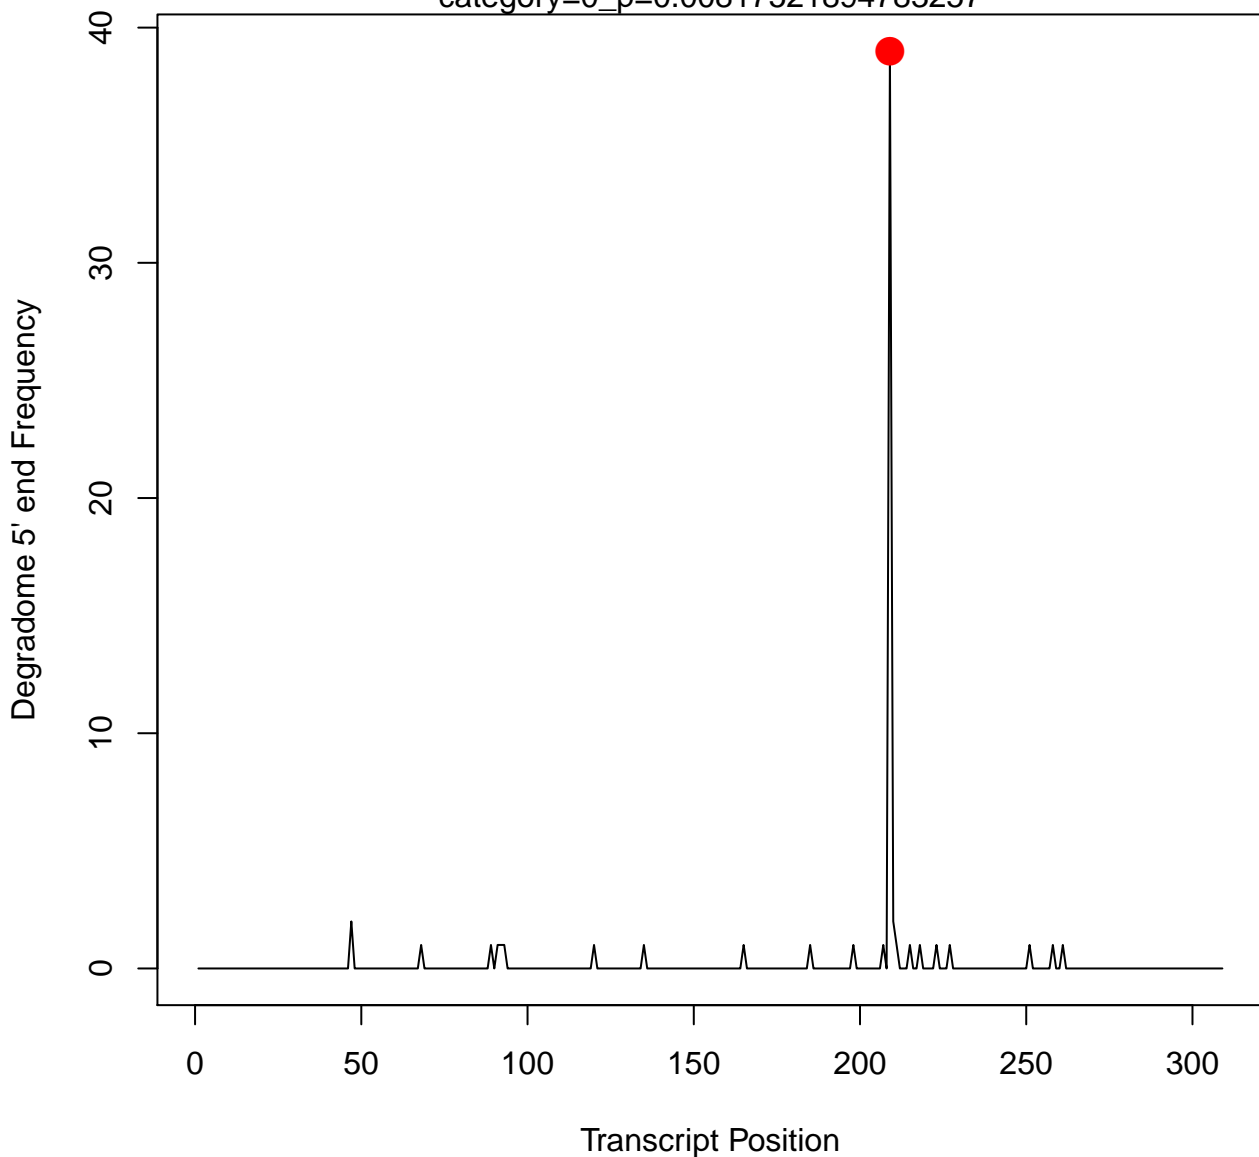

Supplement: s1 [file s1]

**T=Cluster-18410.37572\_Q=novel\_168\_S=156**

category=0\_p=0.0251262853776473

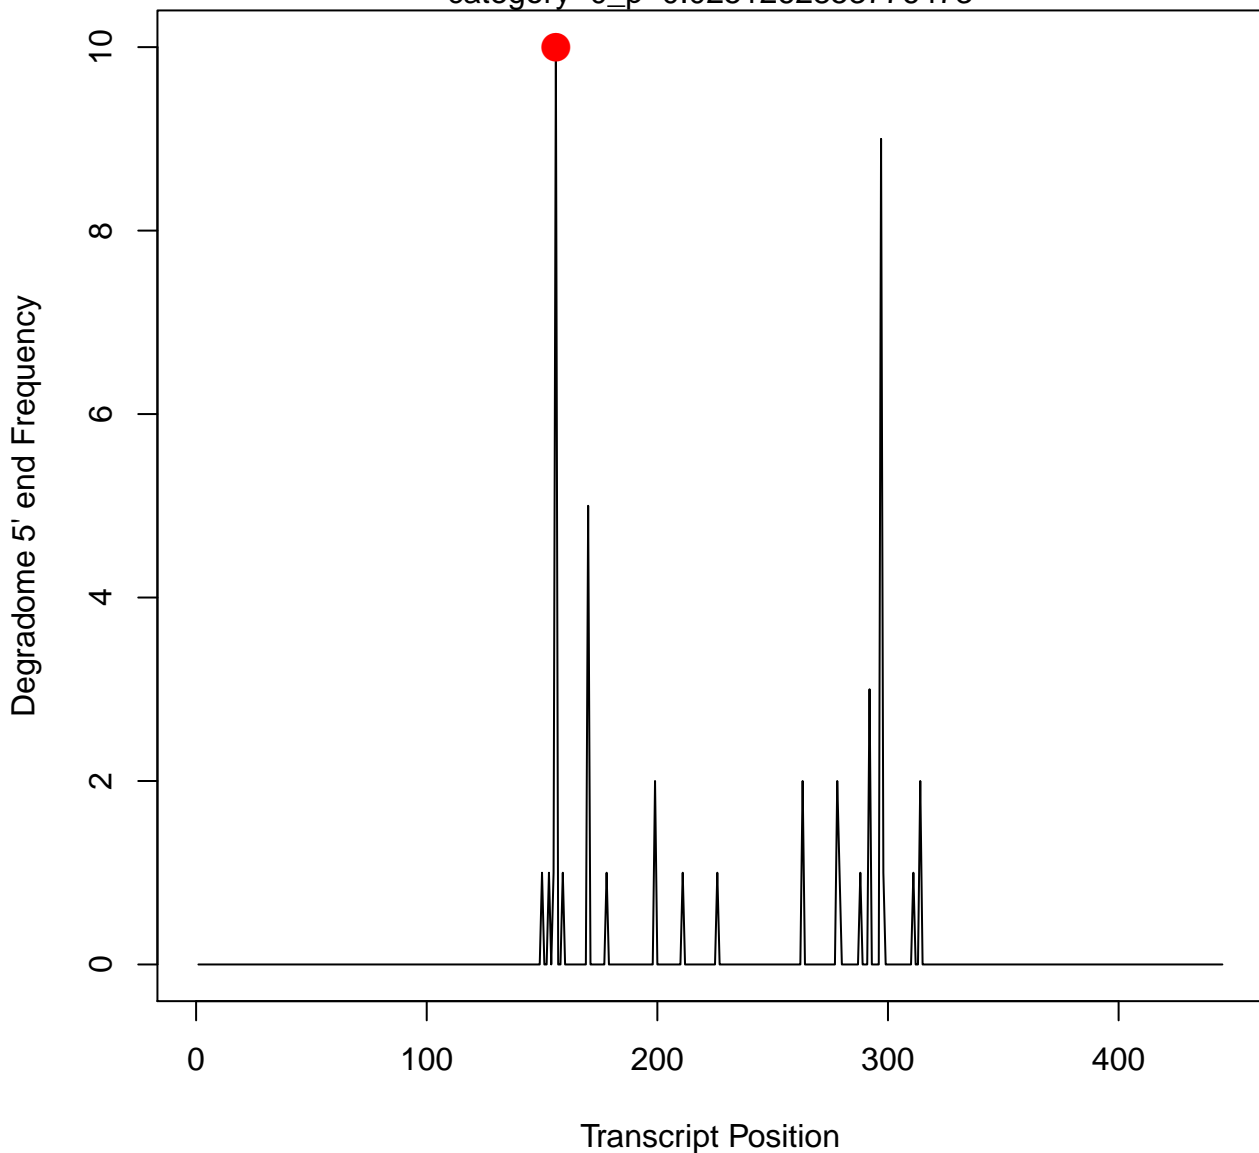

Supplement: s1 [file s1]

**T=Cluster-11210.0\_Q=novel\_25\_S=94**

category=0\_p=0.00464086203705827

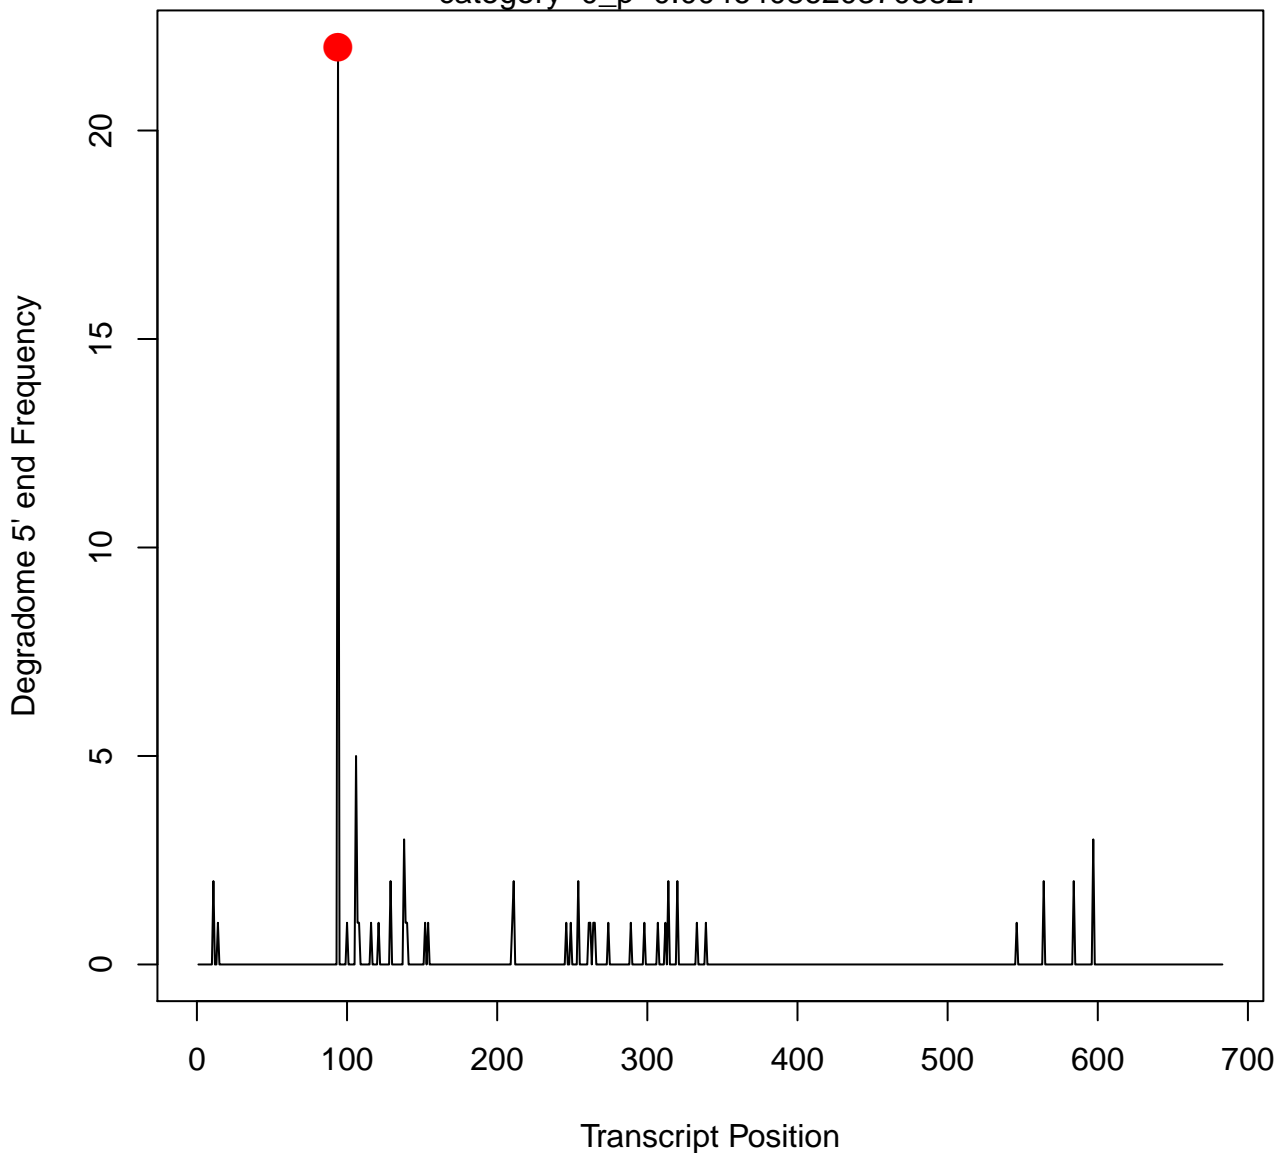

Supplement: s1 [file s1]

**T=Cluster-5215.0\_Q=novel\_168\_S=245**

category=2\_p=0.0780956144108357

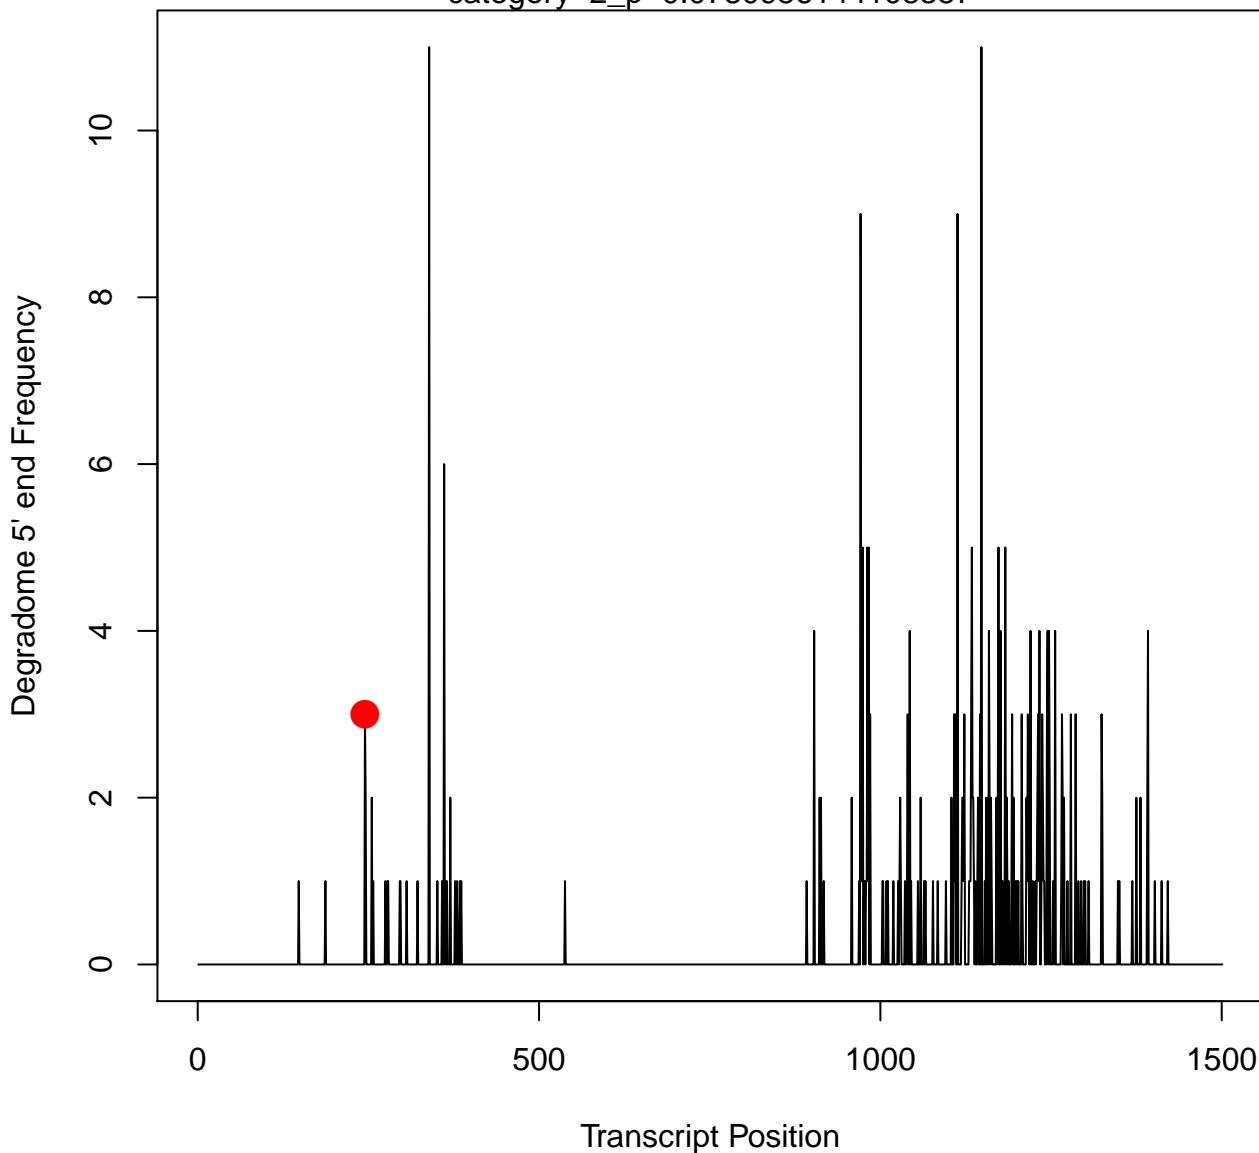

Supplement: s1 [file s1]

**T=Cluster-18410.34222\_Q=novel\_148\_S=812**

category=0\_p=0.0141278717118409

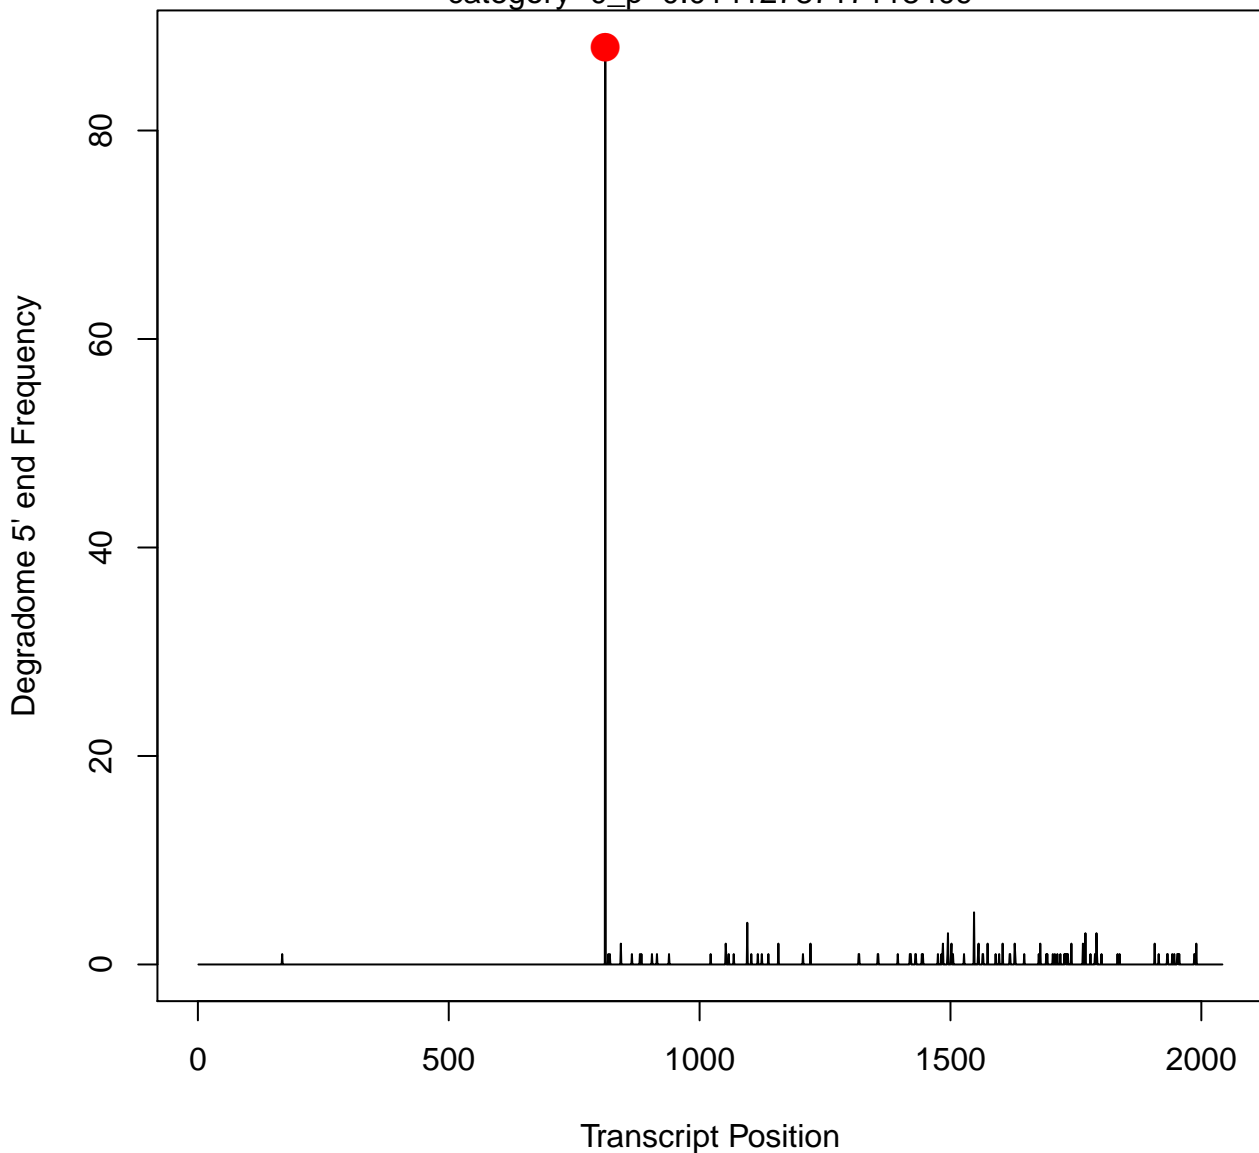

Supplement: s1 [file s1]

**T=Cluster-18410.87654\_Q=pma-miR1316\_S=1956**

category=1\_p=0.00497886935599645

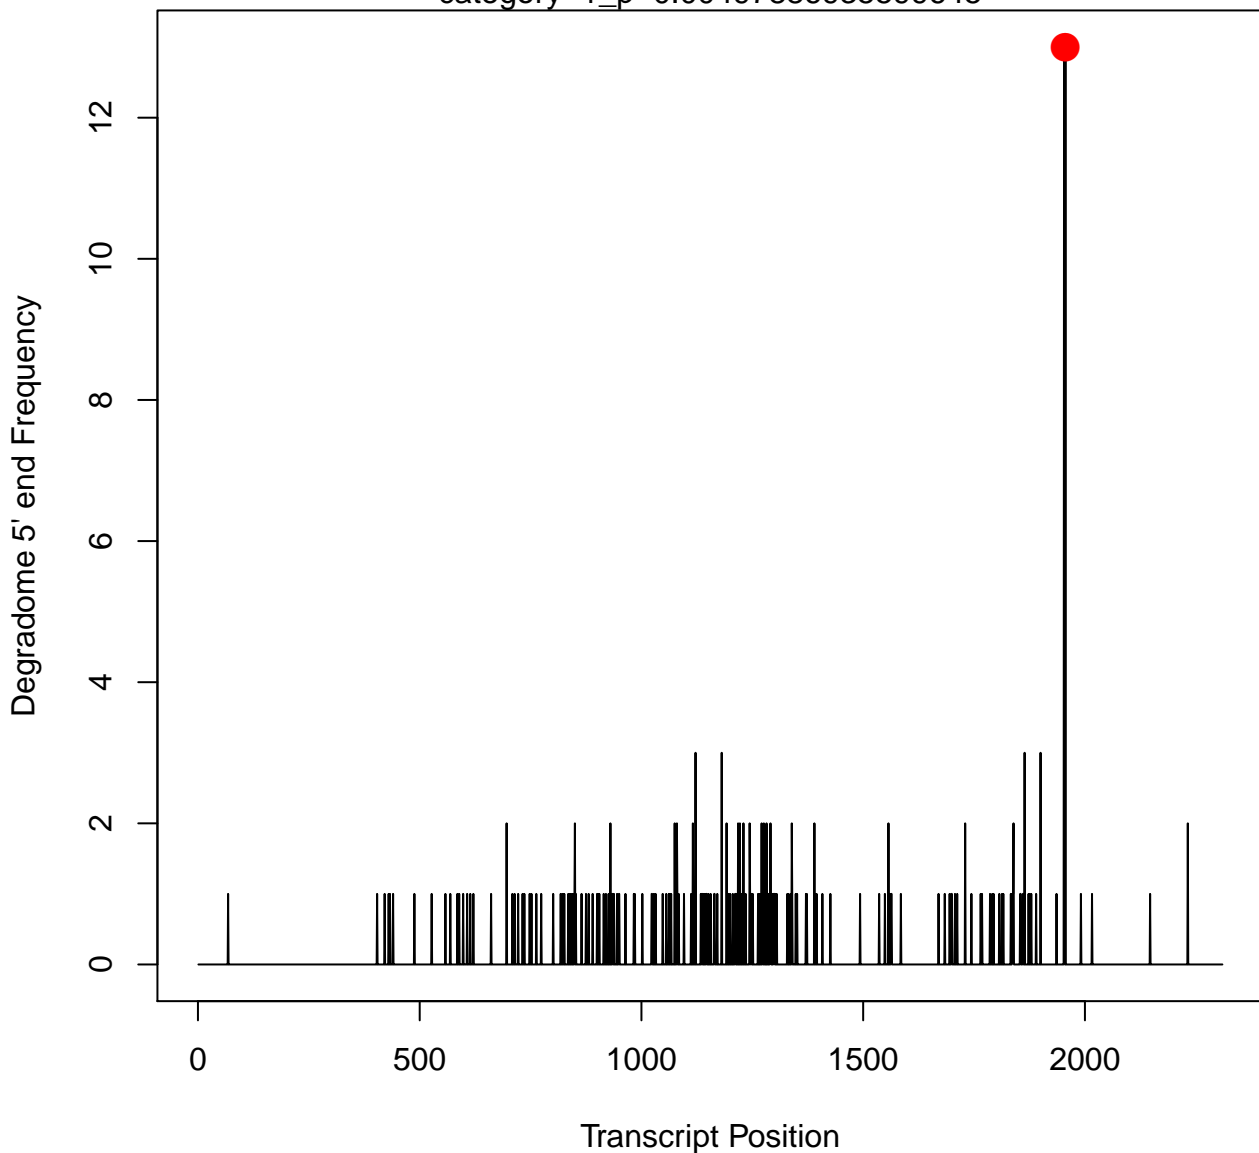

Supplement: s1 [file s1]

**T=Cluster-18410.54393\_Q=novel\_120\_S=5941**

category=3\_p=0.0781921676015778

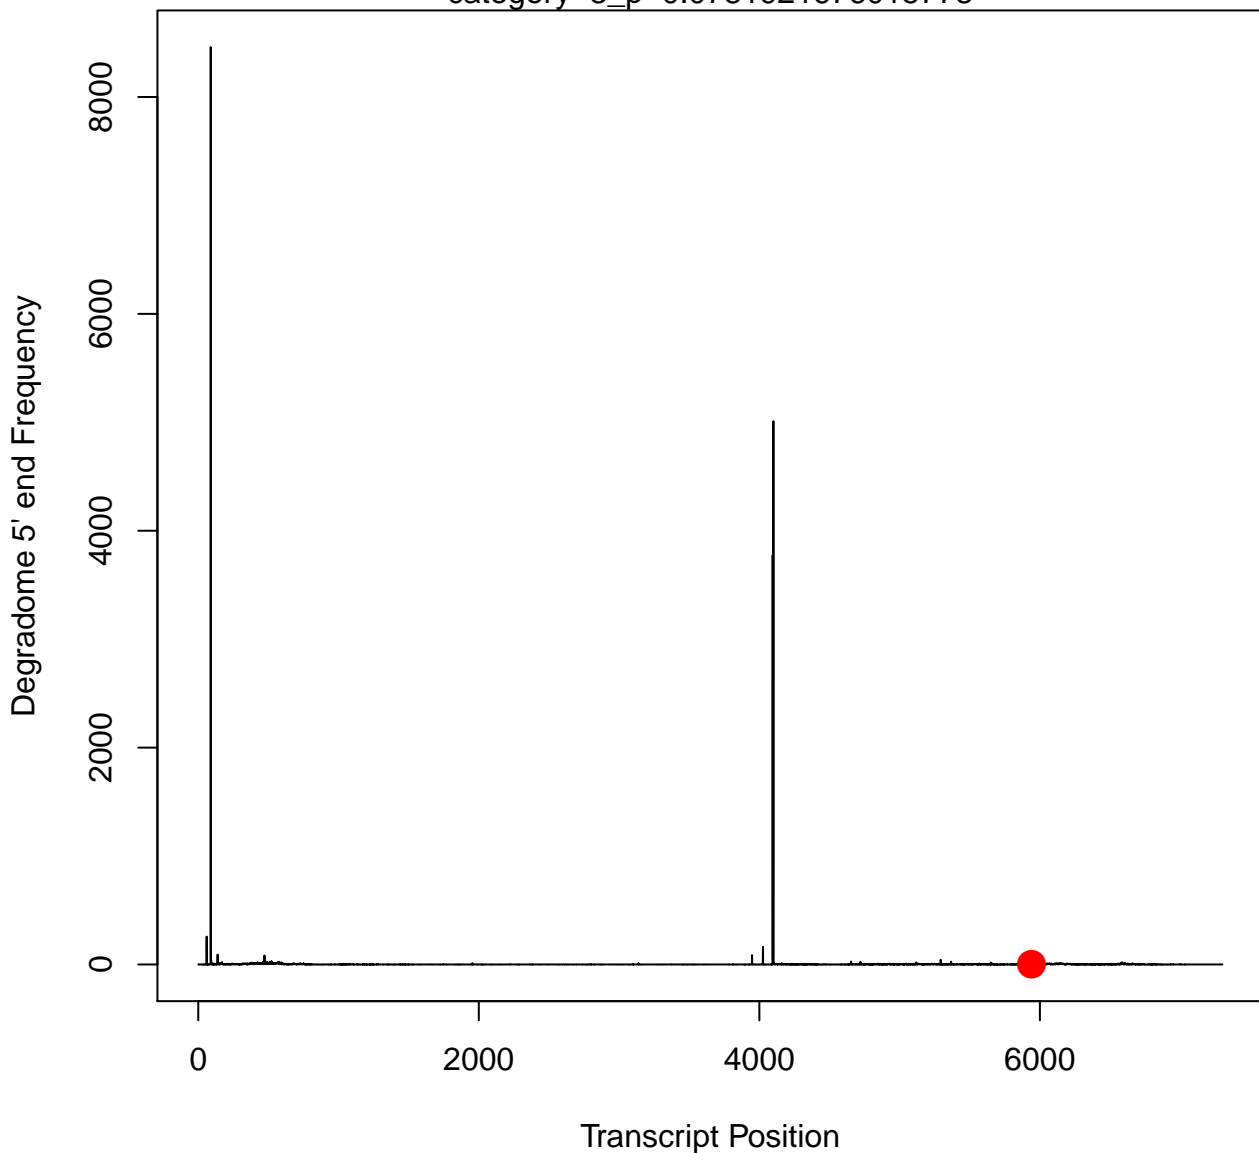

Supplement: s1 [file s1]

**T=Cluster-18410.85384\_Q=novel\_6\_S=234**

category=0\_p=0.00191355797950399

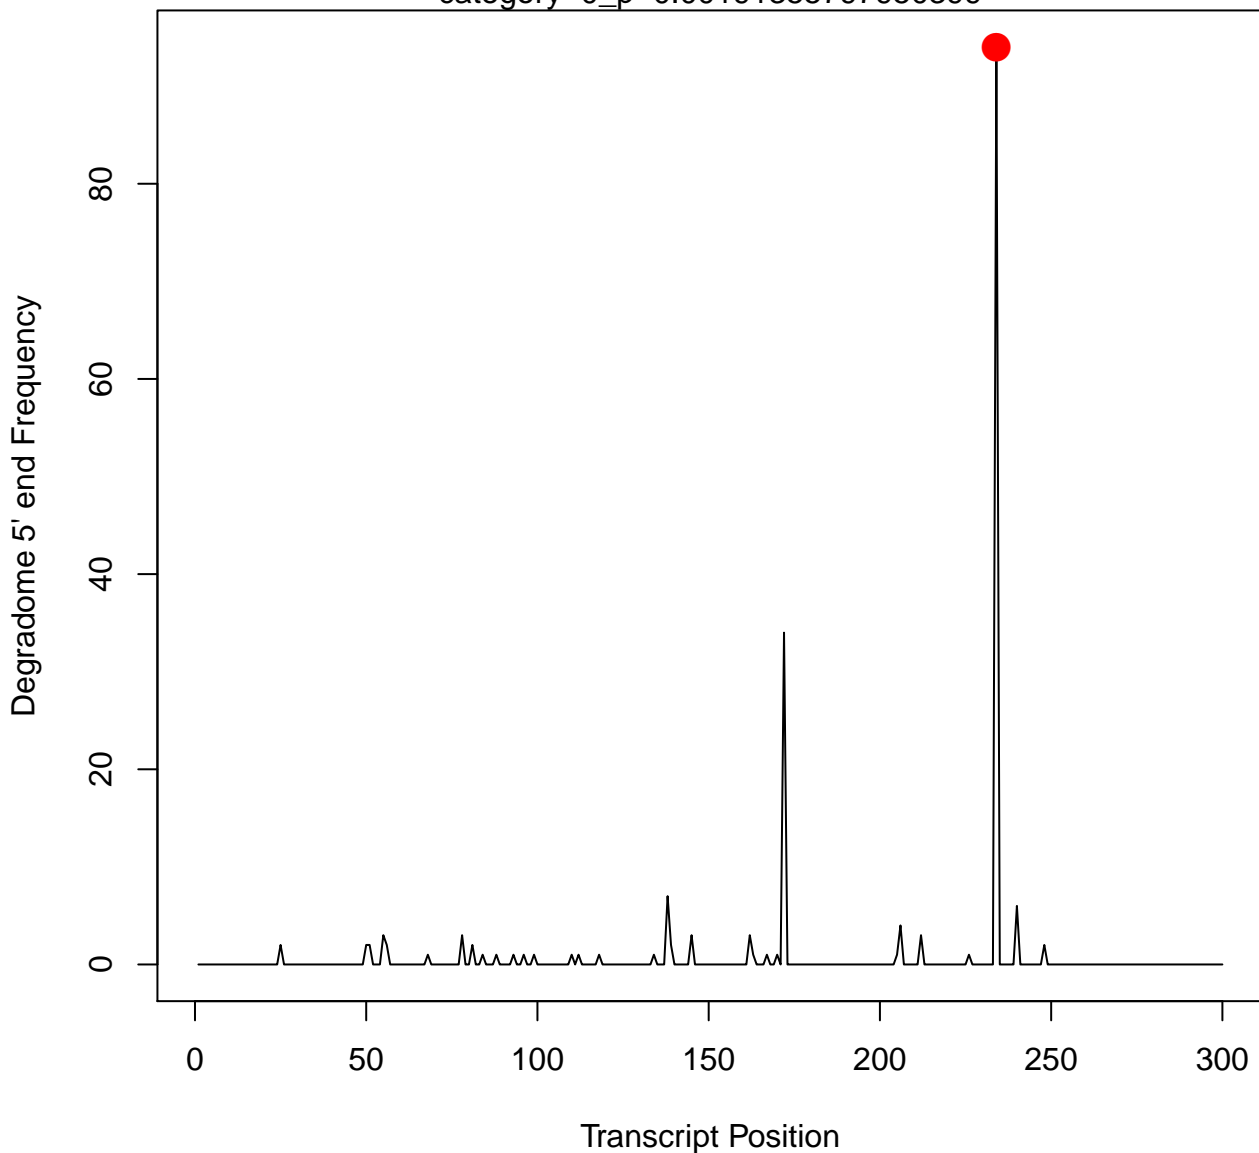

Supplement: s1 [file s1]
