# Supplementary figures and images for: Uncovering miRNA-mRNA Regulatory Modules in Developing Xylem of Pinus massoniana via Small RNA and Degradome Sequencing (part 5 of 9)
Source: MDPI journal article supplement (doi:10.3390/ijms221810154), 2021-09-21

**T=Cluster-18410.32067\_Q=novel\_6\_S=242**

category=2\_p=0.0342485307007228

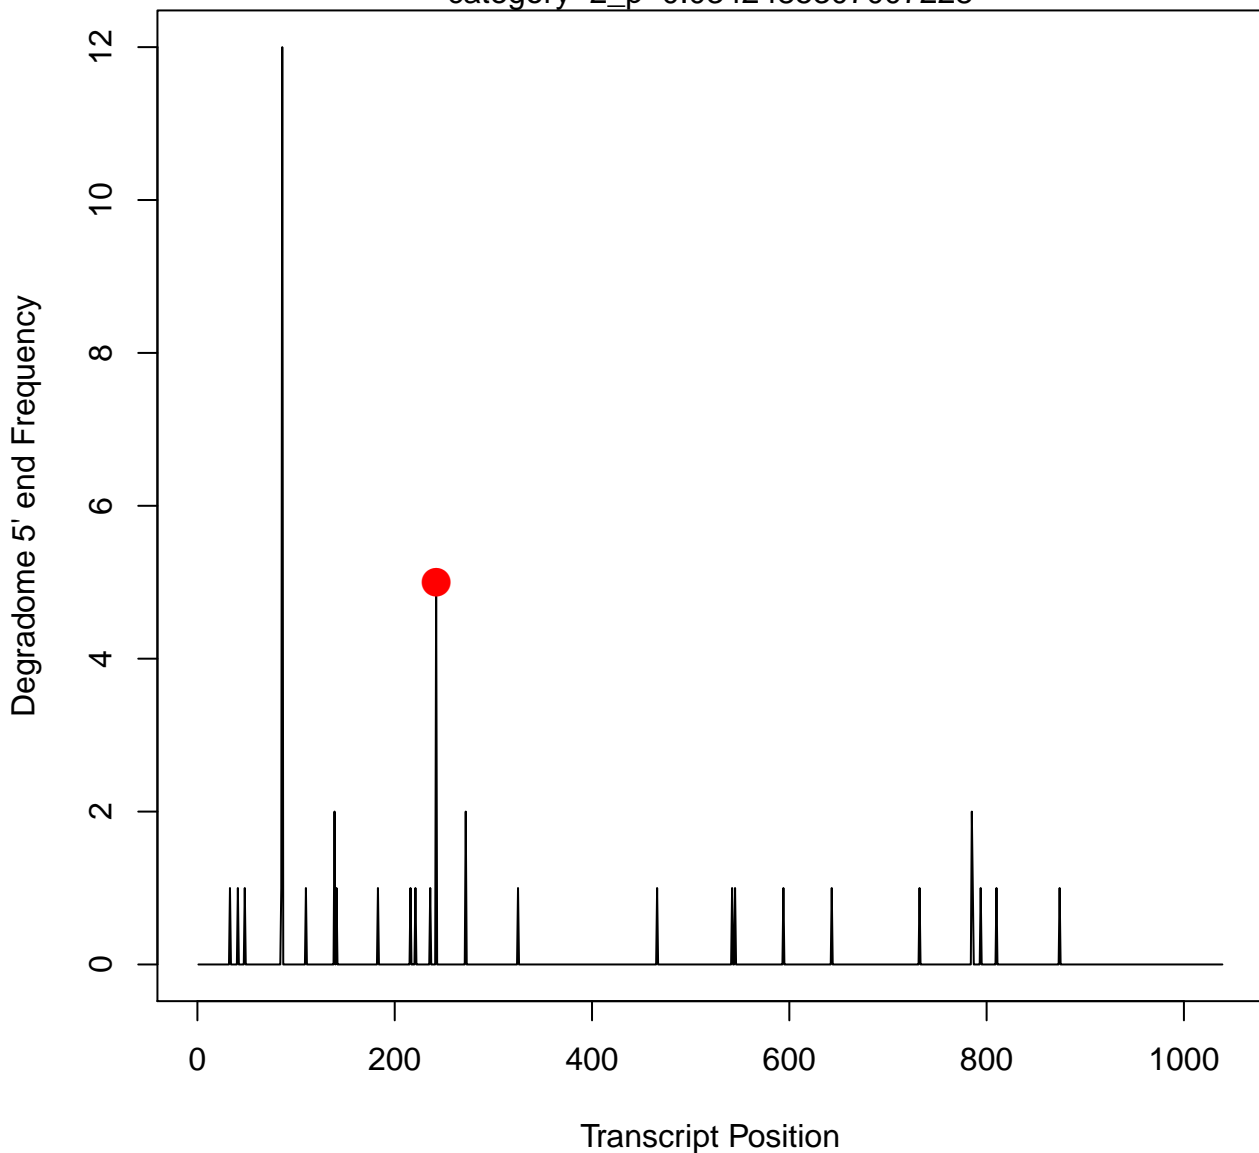

Supplement: s1 [file s1]

**T=Cluster-18410.39685\_Q=novel\_46\_S=537**

category=2\_p=0.0454020367599618

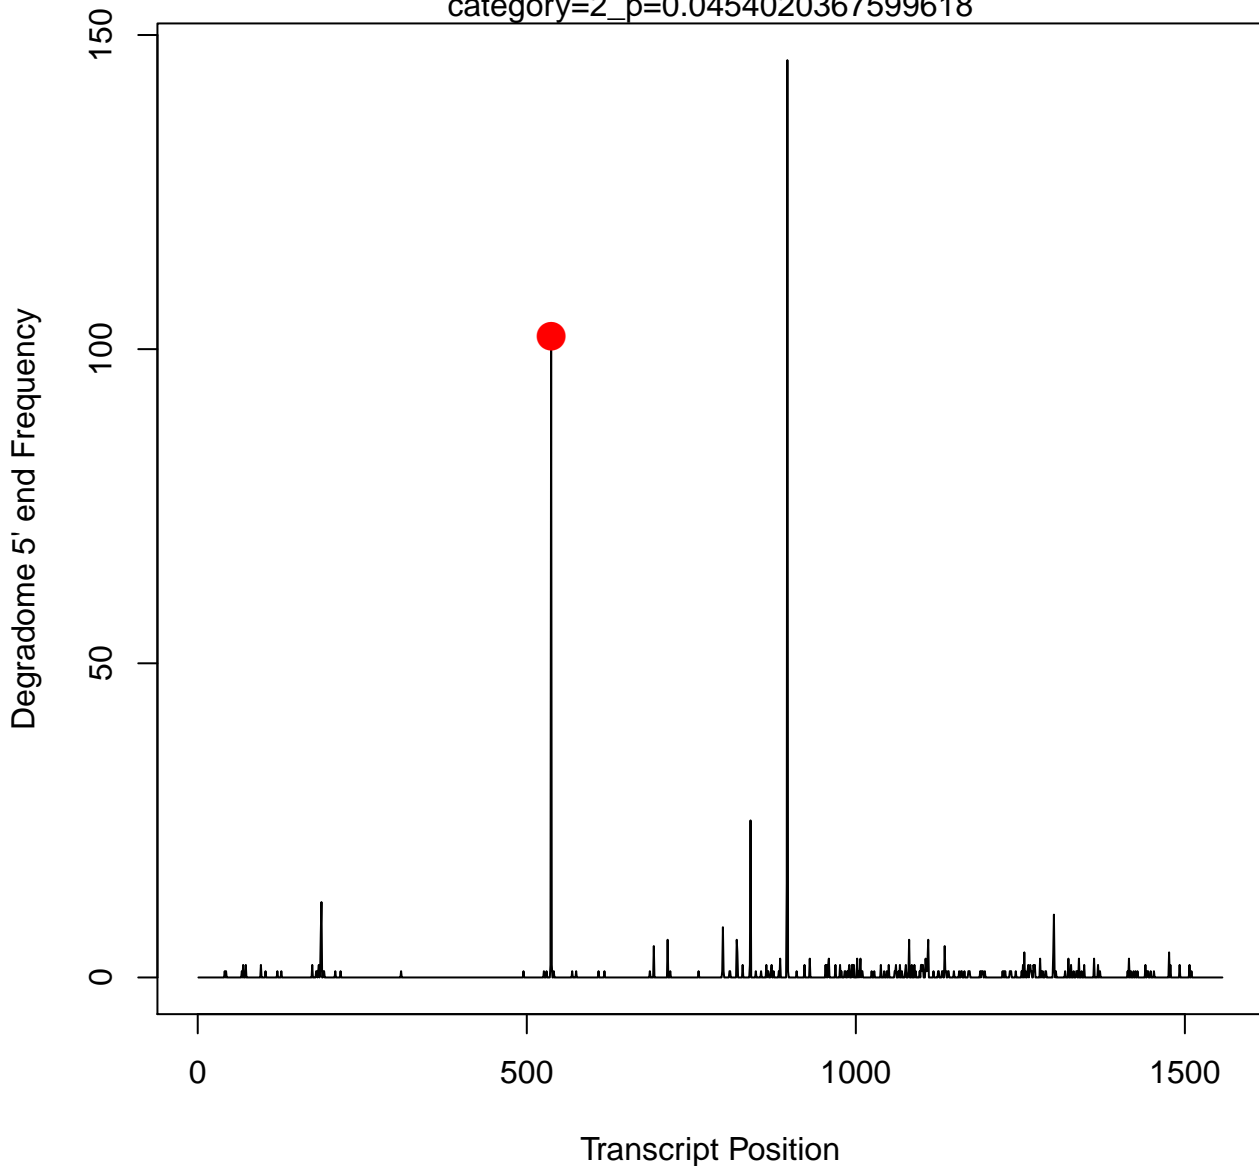

Supplement: s1 [file s1]

**T=Cluster-18410.37060\_Q=pma-miR951\_S=361**

category=0\_p=0.00245961596621247

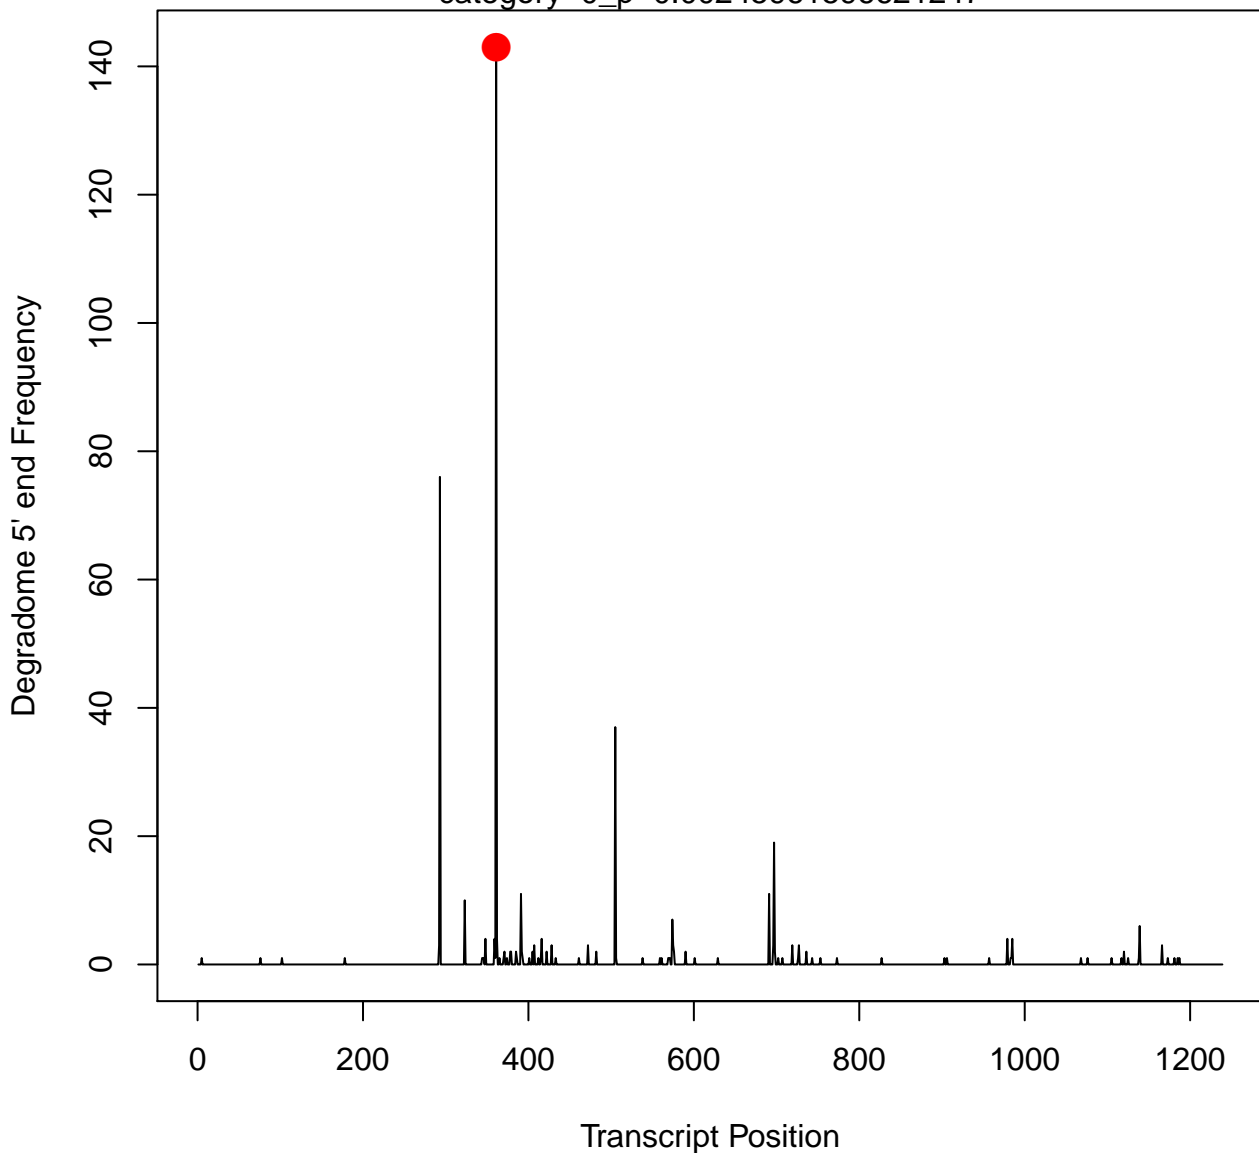

Supplement: s1 [file s1]

**T=Cluster-18410.59152\_Q=novel\_152\_S=354**

category=3\_p=0.063058846212125

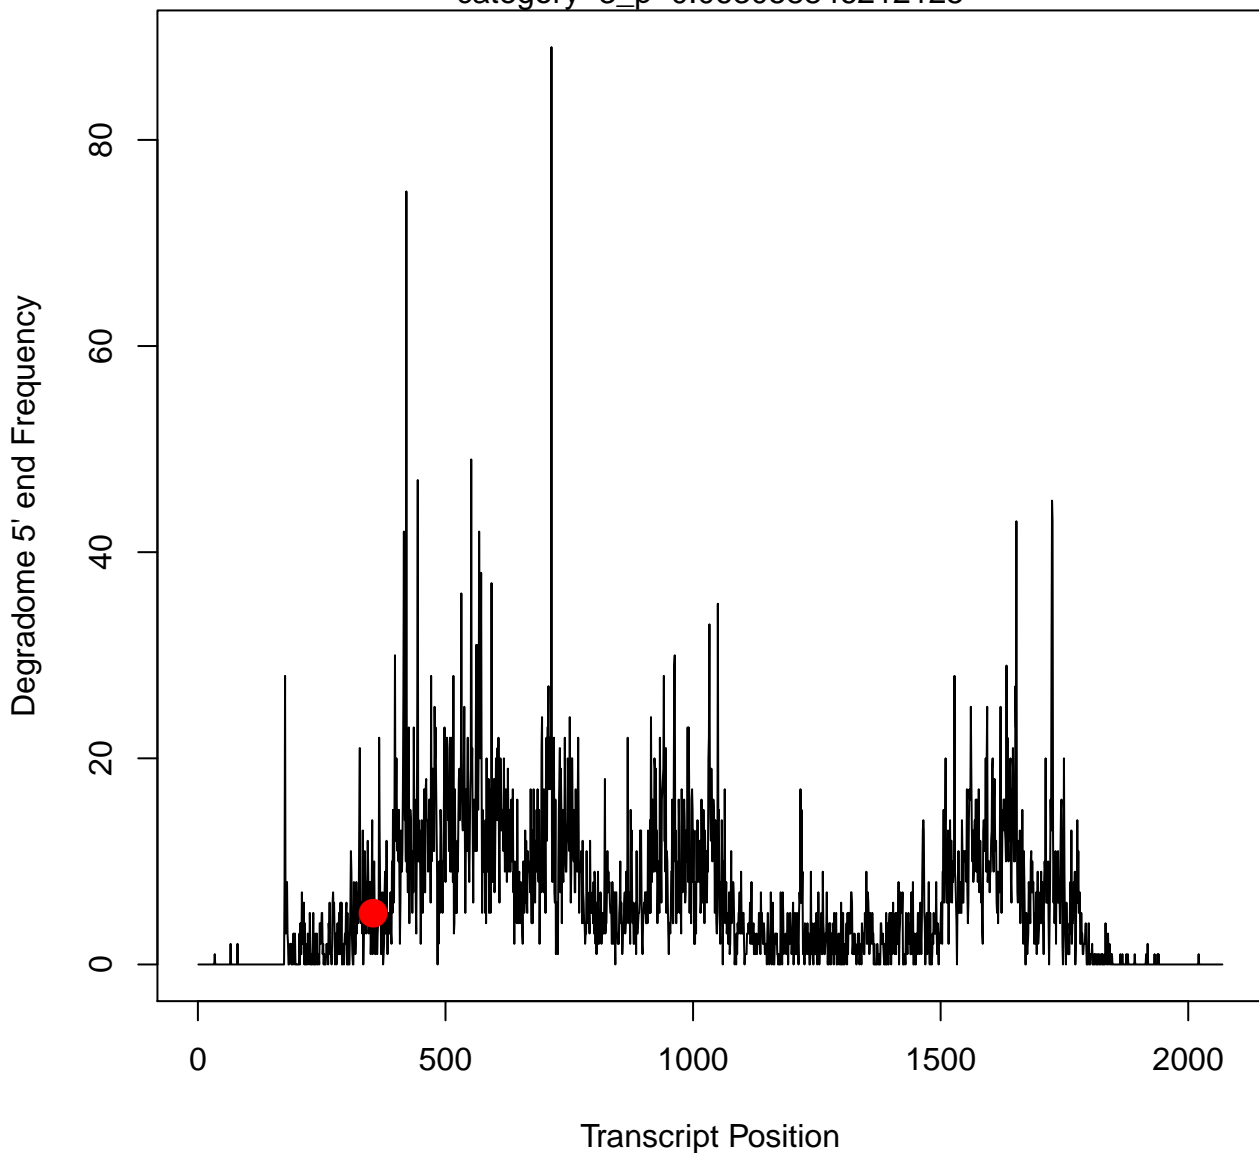

Supplement: s1 [file s1]

**T=Cluster-18410.68171\_Q=novel\_122\_S=130**

category=1\_p=0.0179307771640168

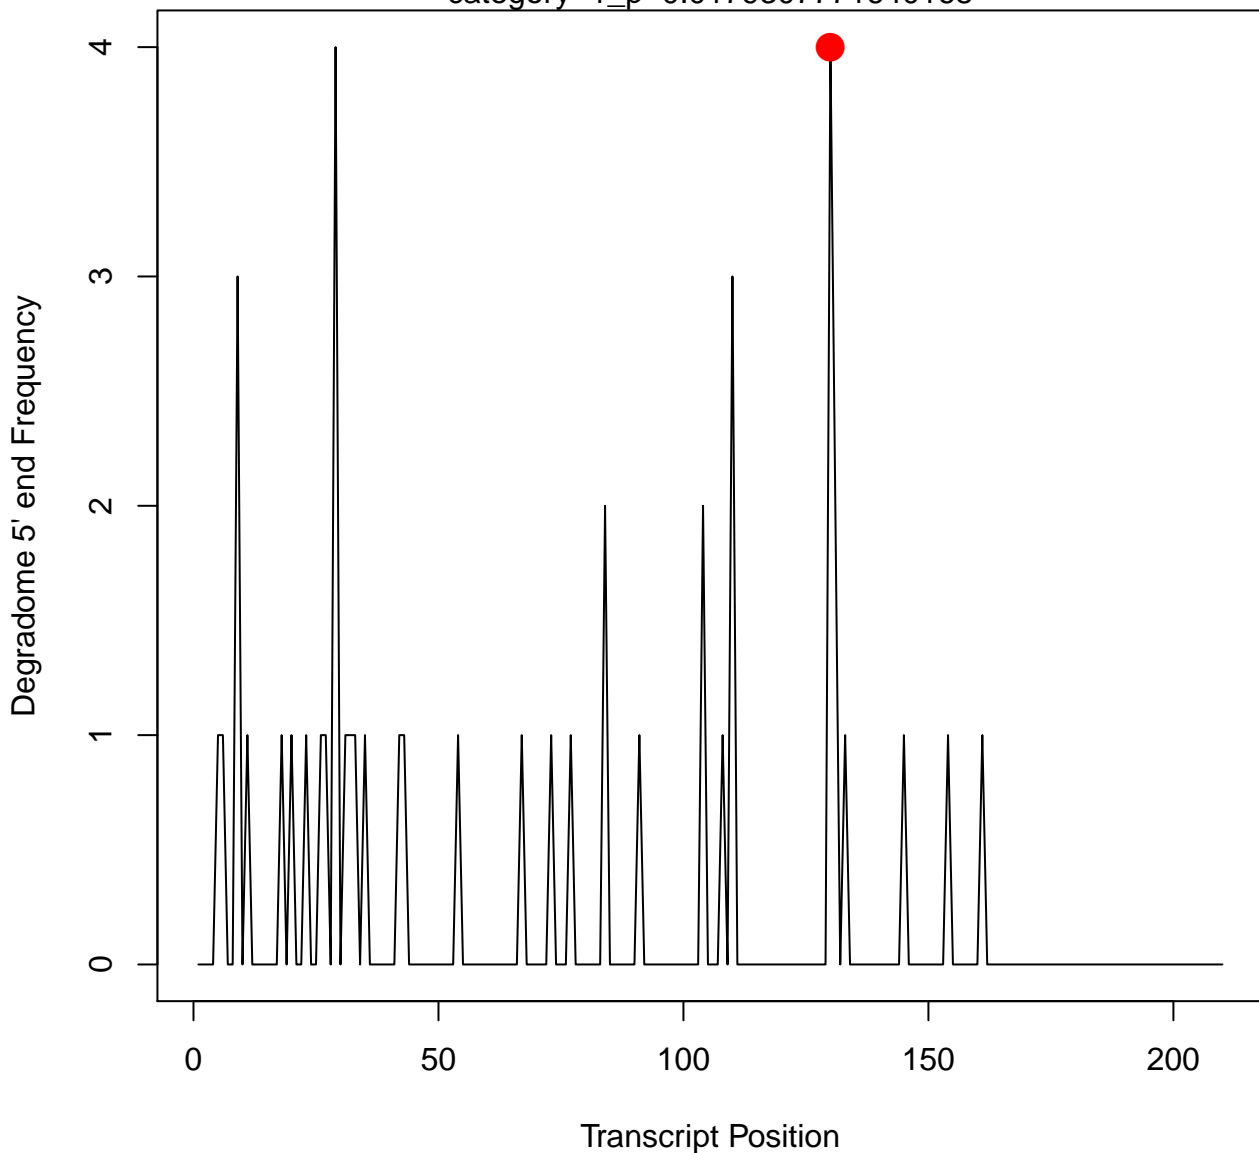

Supplement: s1 [file s1]

**T=Cluster-18410.80423\_Q=novel\_67\_S=102**

category=2\_p=0.0229647072699788

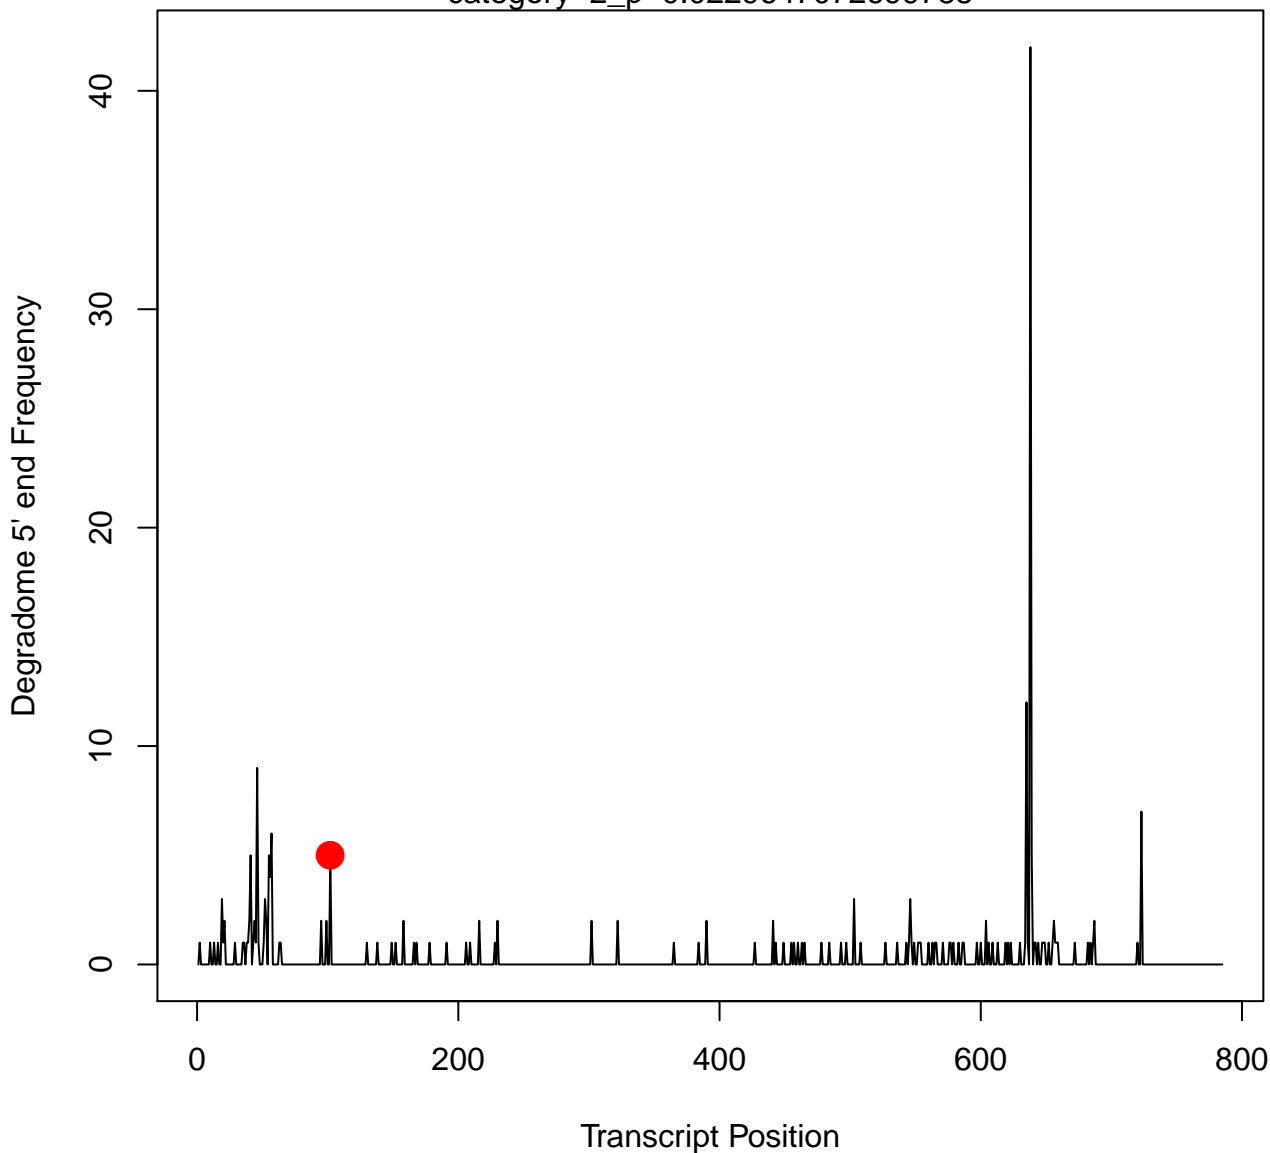

Supplement: s1 [file s1]

**T=Cluster-18410.47254\_Q=novel\_144\_S=937**

category=4\_p=0.0715786587755043

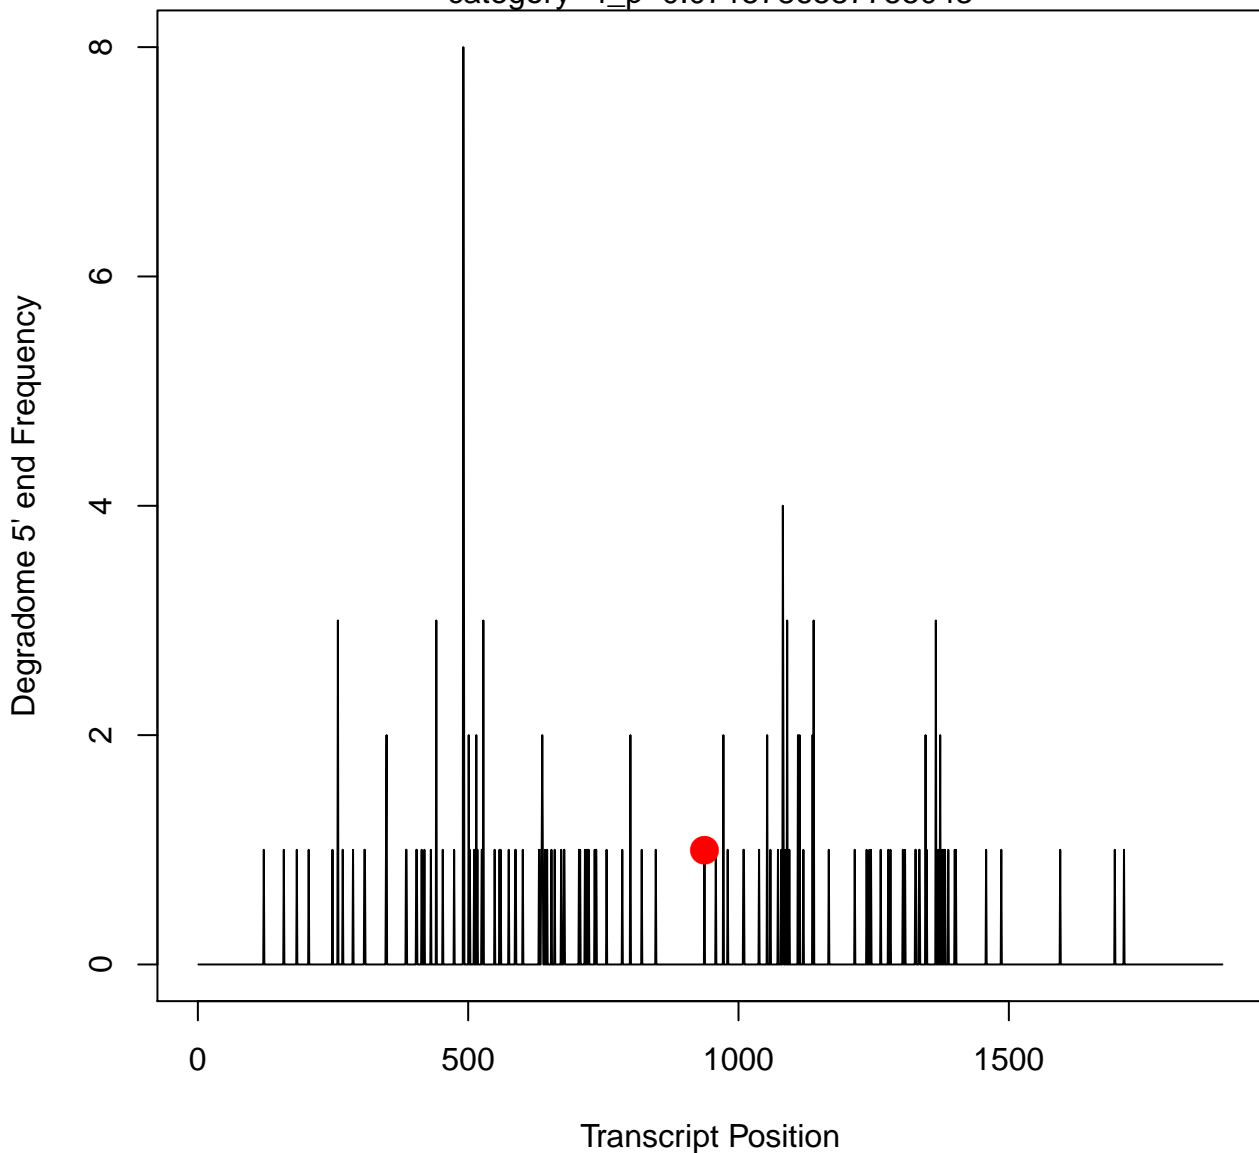

Supplement: s1 [file s1]

**T=Cluster-18410.20716\_Q=novel\_146\_S=558**

category=1\_p=0.0225154863587329

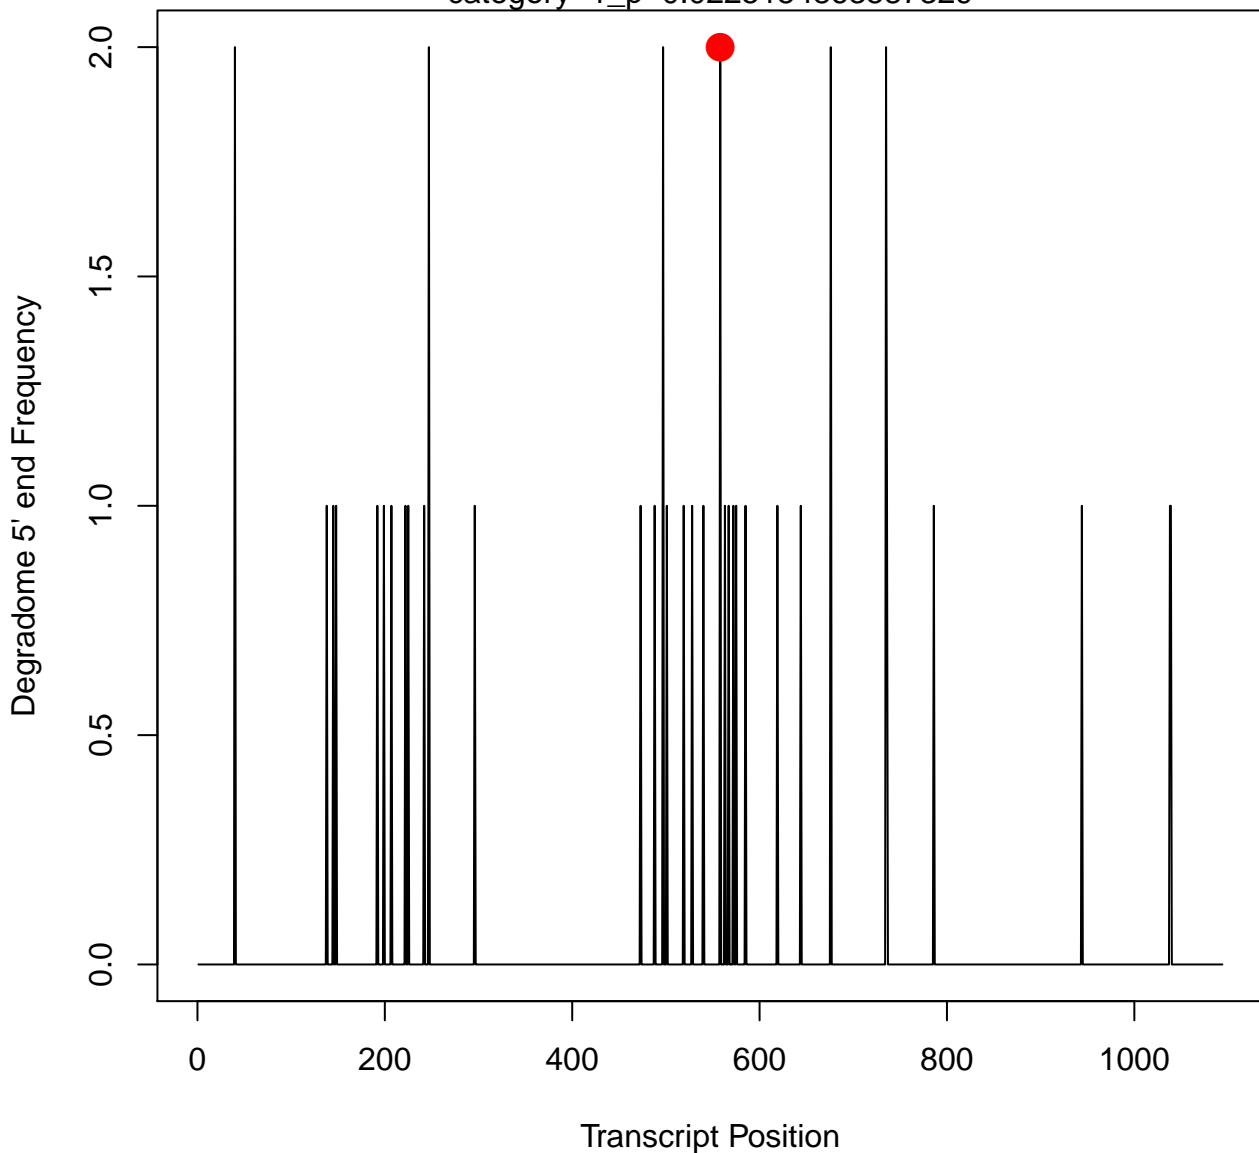

Supplement: s1 [file s1]

**T=Cluster-18410.36950\_Q=novel\_144\_S=937**

category=2\_p=0.0564267304887326

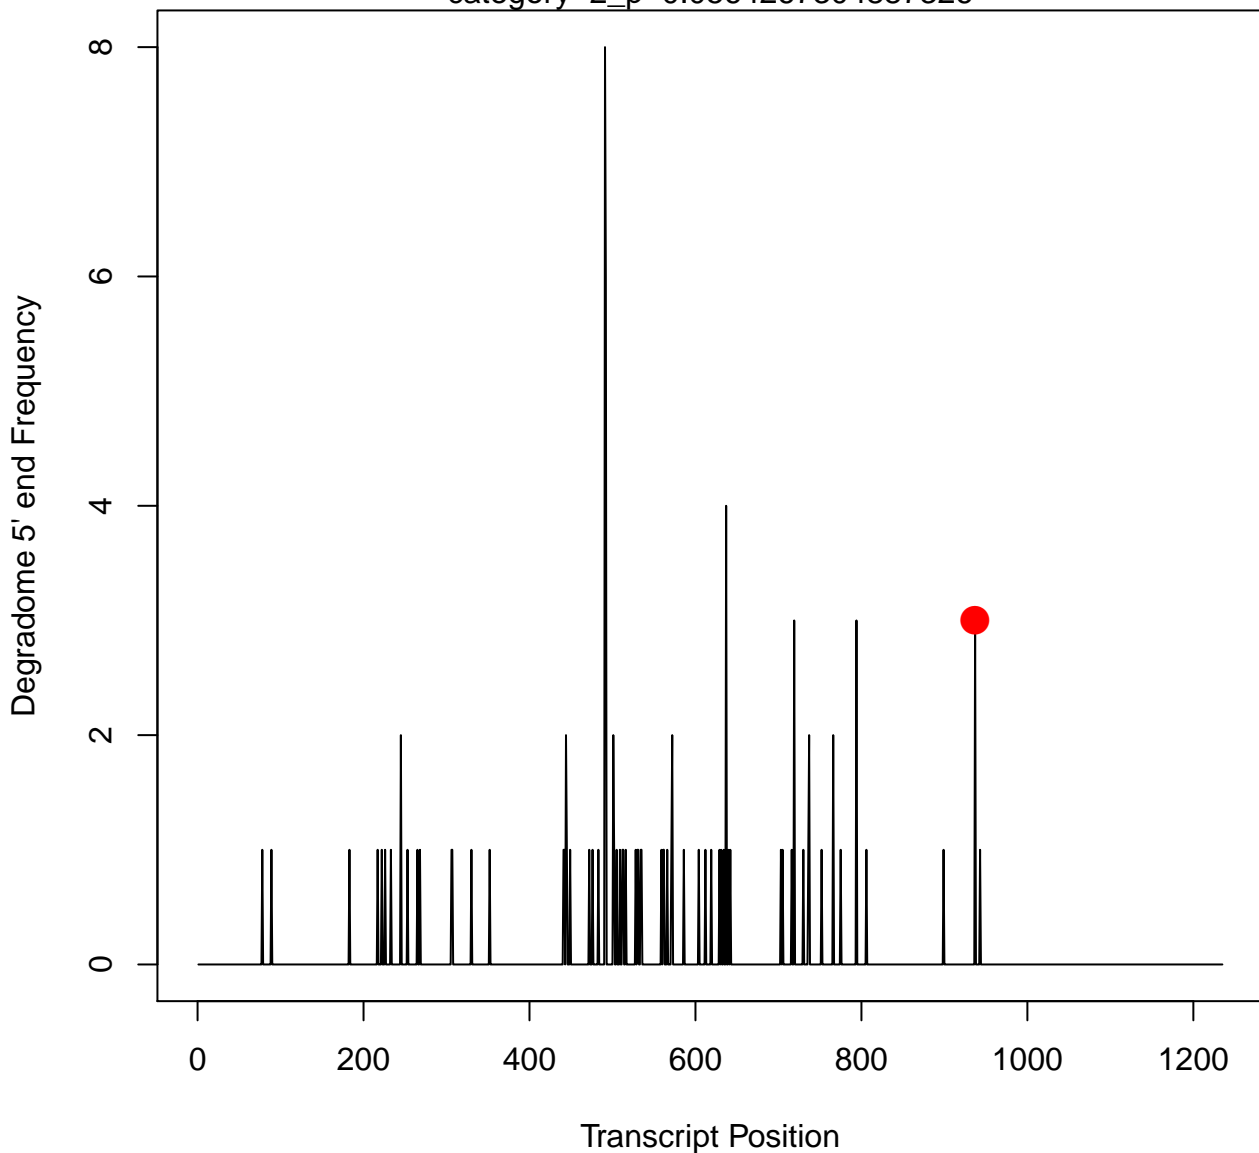

Supplement: s1 [file s1]

**T=Cluster-18410.100718\_Q=pma-miR1311\_S=814**

category=0\_p=0.0168217997550542

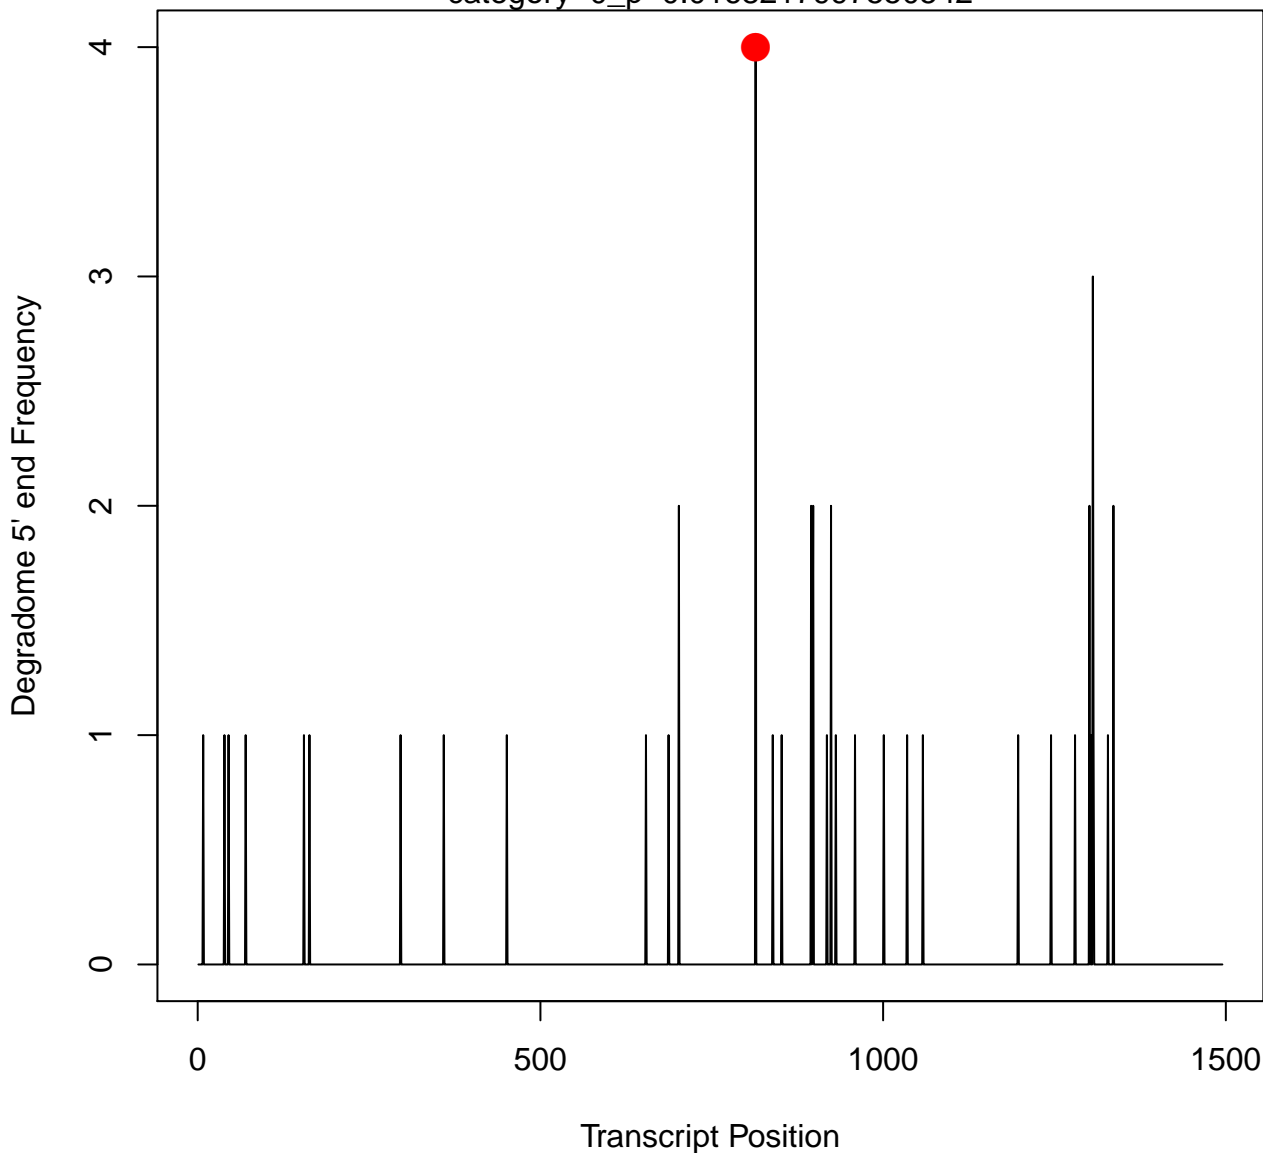

Supplement: s1 [file s1]

**T=Cluster-18410.10690\_Q=novel\_74\_S=632**

category=0\_p=0.00273253291772324

Degradome 5' end Frequency

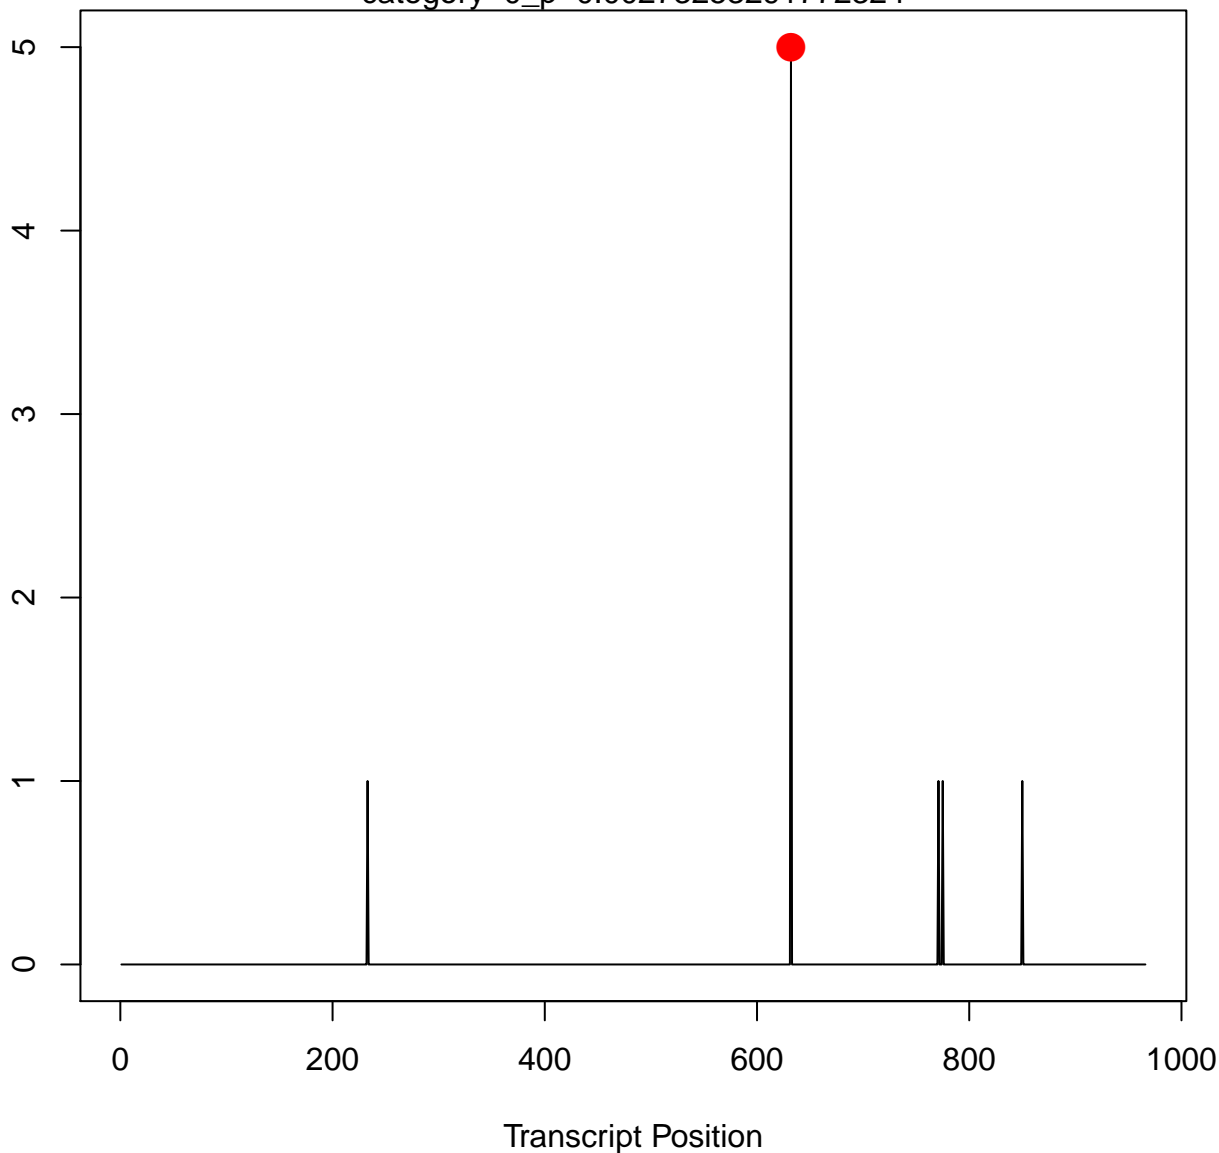

Supplement: s1 [file s1]

**T=Cluster-18410.41025\_Q=novel\_20\_S=1894**

category=0\_p=0.00871785114912016

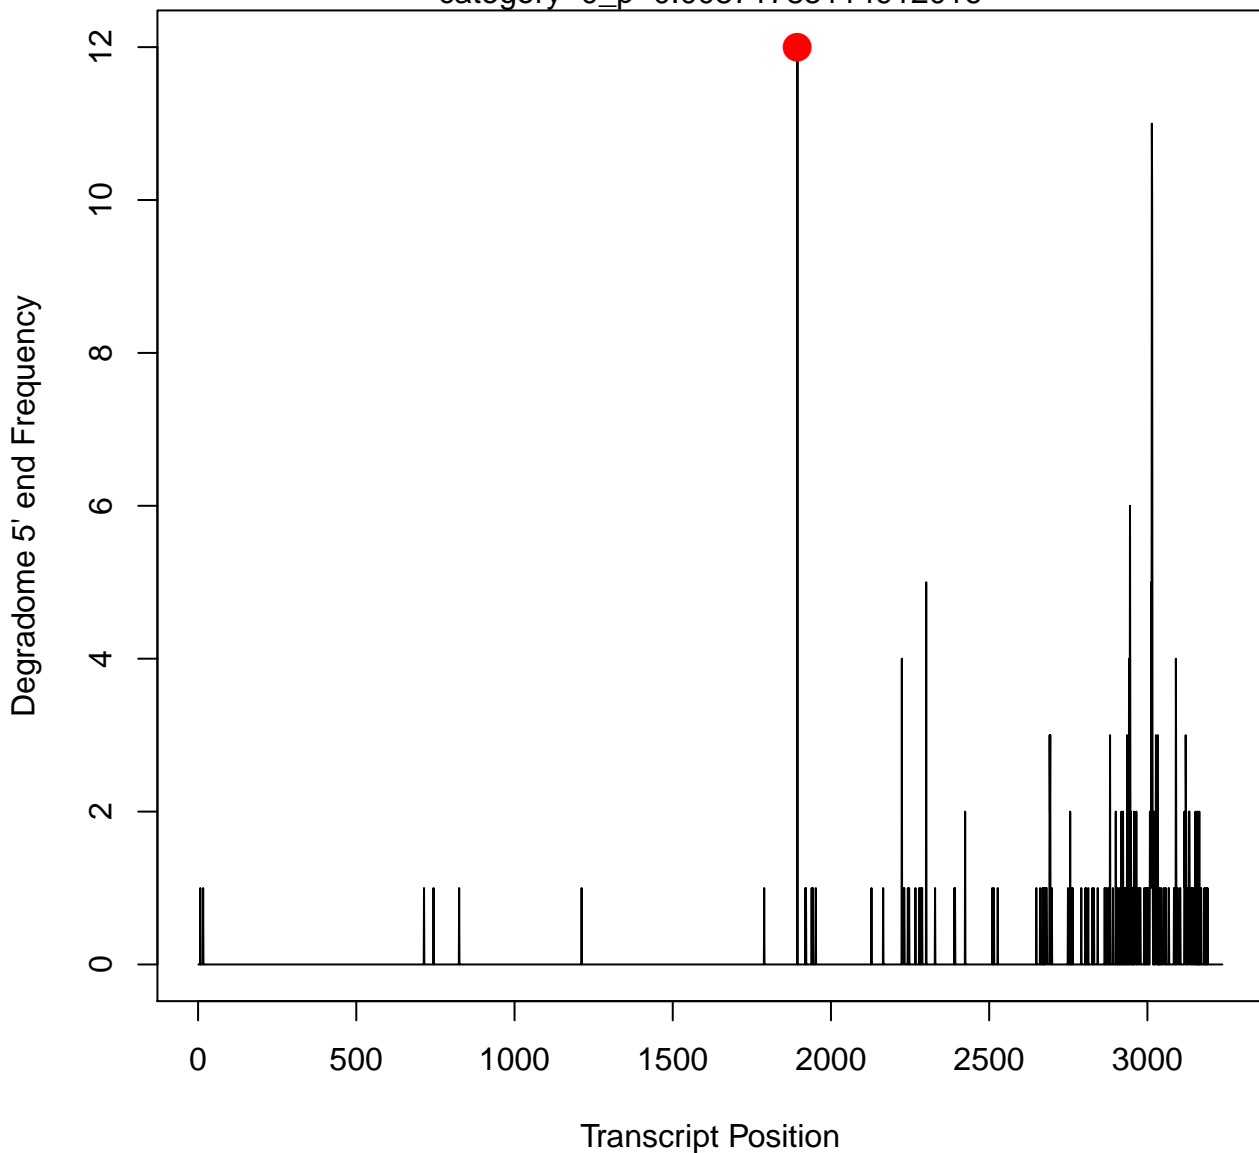

Supplement: s1 [file s1]

**T=Cluster-18410.85290\_Q=pma-miR951\_S=343**

category=0\_p=0.0116970259373812

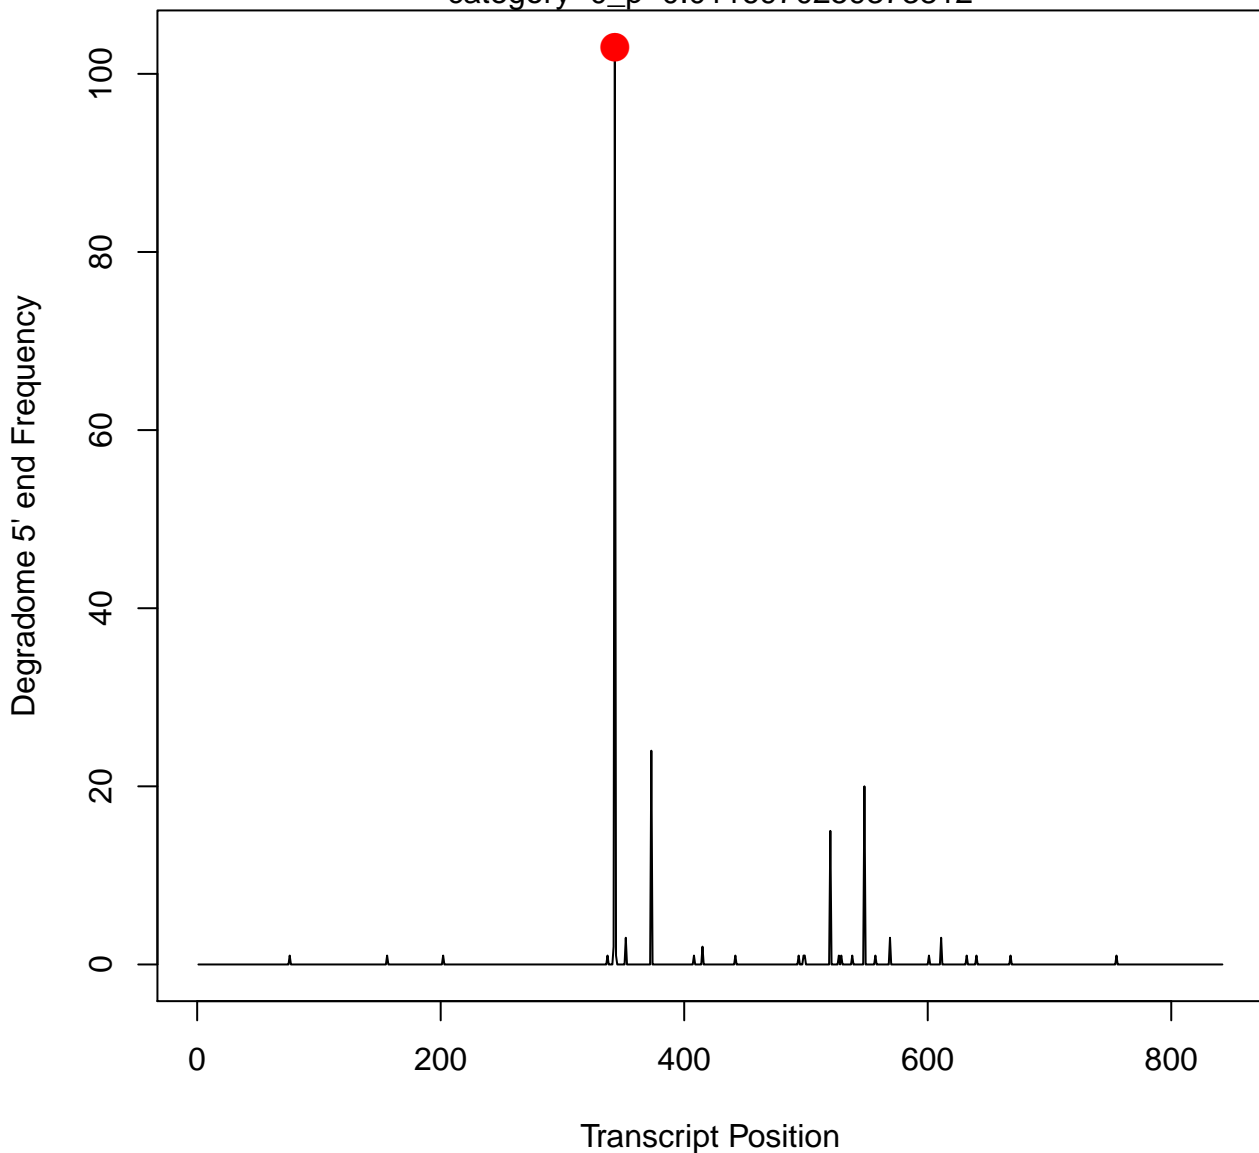

Supplement: s1 [file s1]

**T=Cluster-18410.117679\_Q=novel\_35\_S=998**

category=4\_p=0.0483072886549676

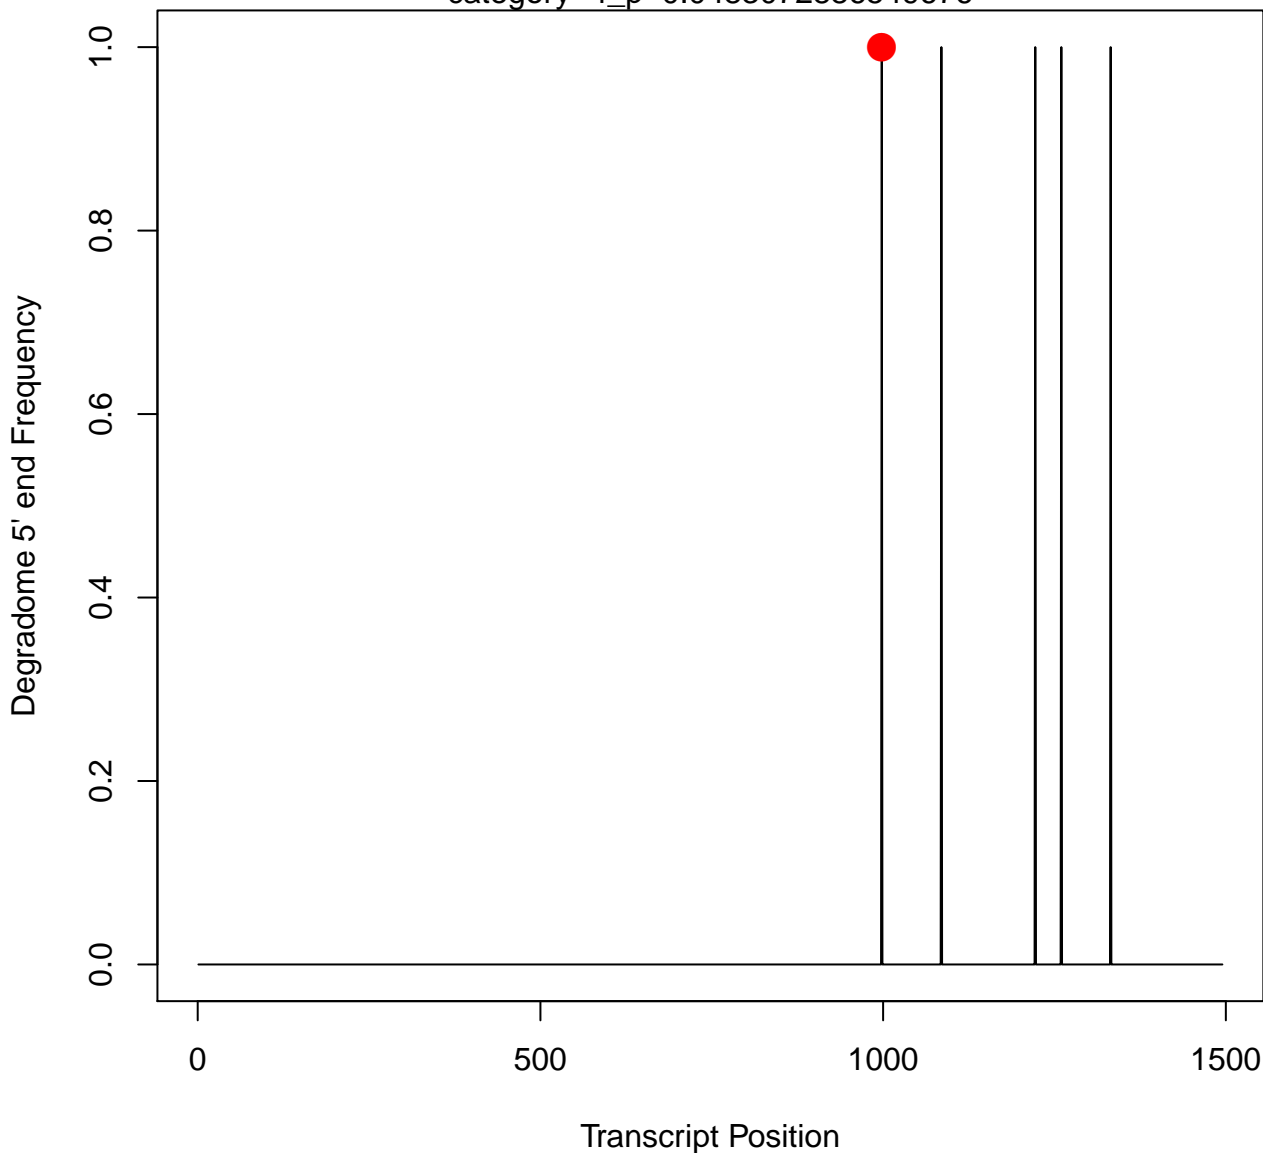

Supplement: s1 [file s1]

**T=Cluster-18410.84058\_Q=novel\_2\_S=209**

category=2\_p=0.0564267304887326

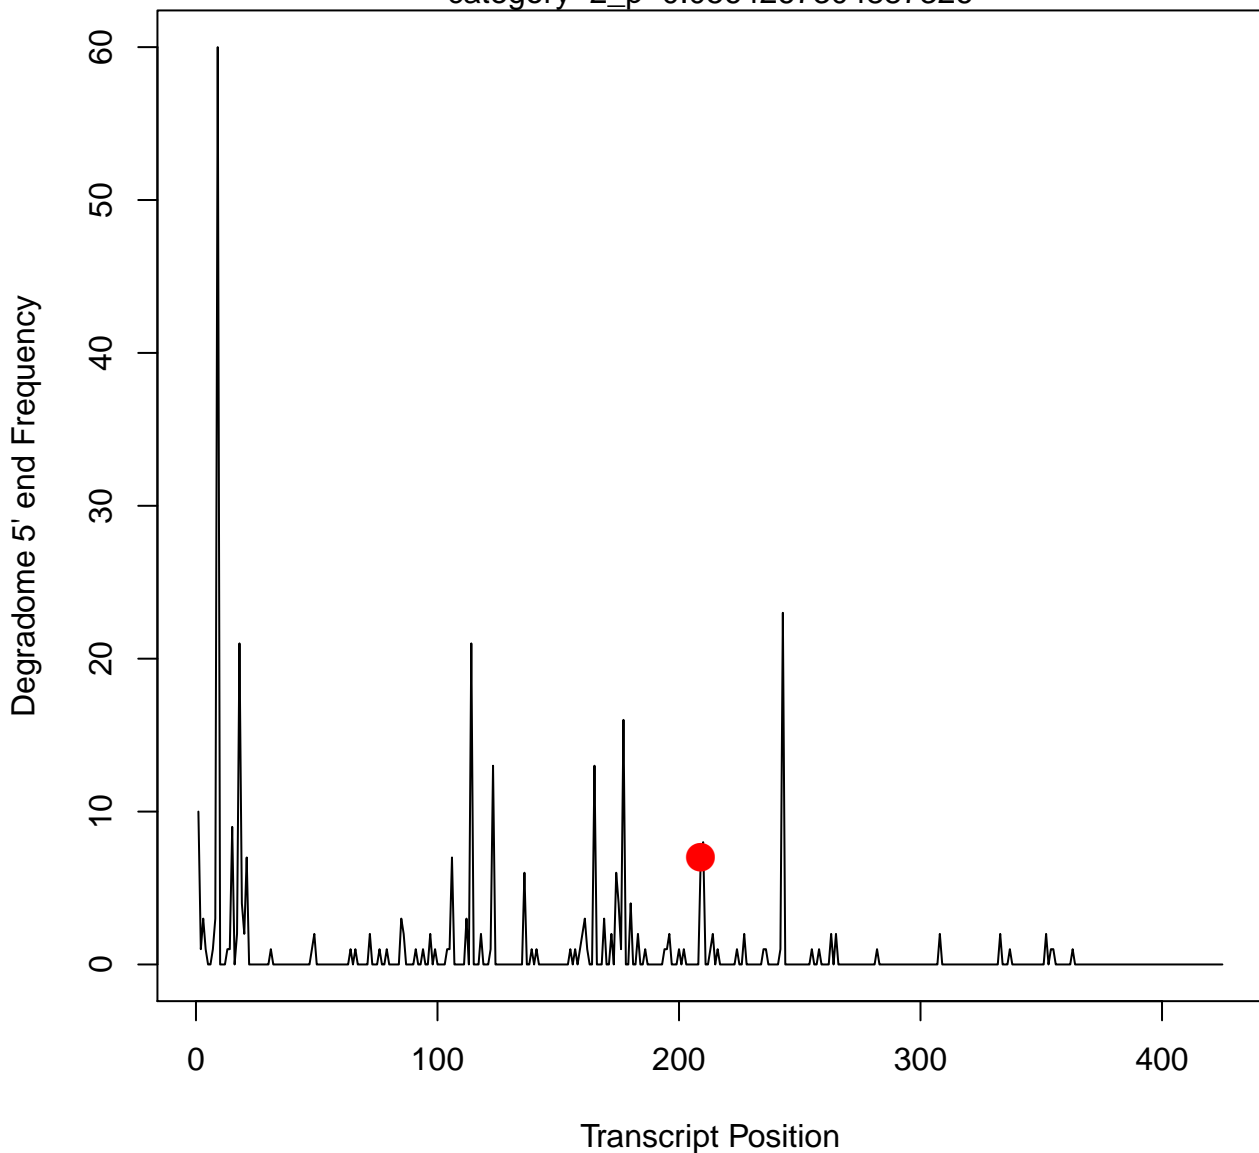

Supplement: s1 [file s1]

**T=Cluster-18410.98892\_Q=novel\_64\_S=327**

category=0\_p=0.00245961596621247

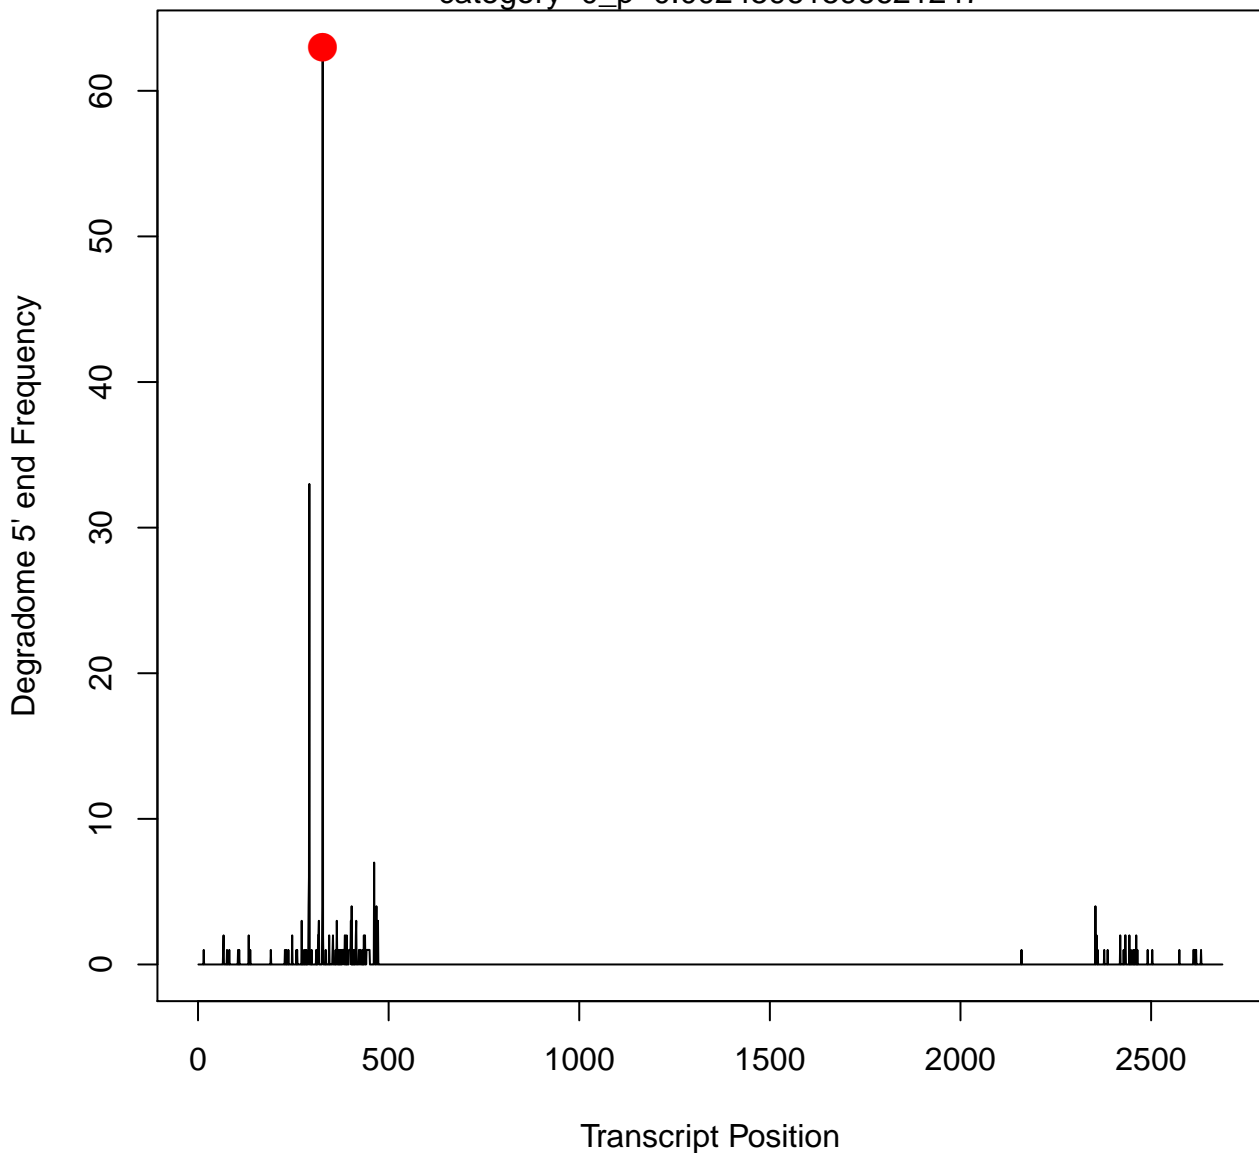

Supplement: s1 [file s1]

**T=Cluster-18410.59723\_Q=novel\_13\_S=296**

category=0\_p=0.00300537520191857

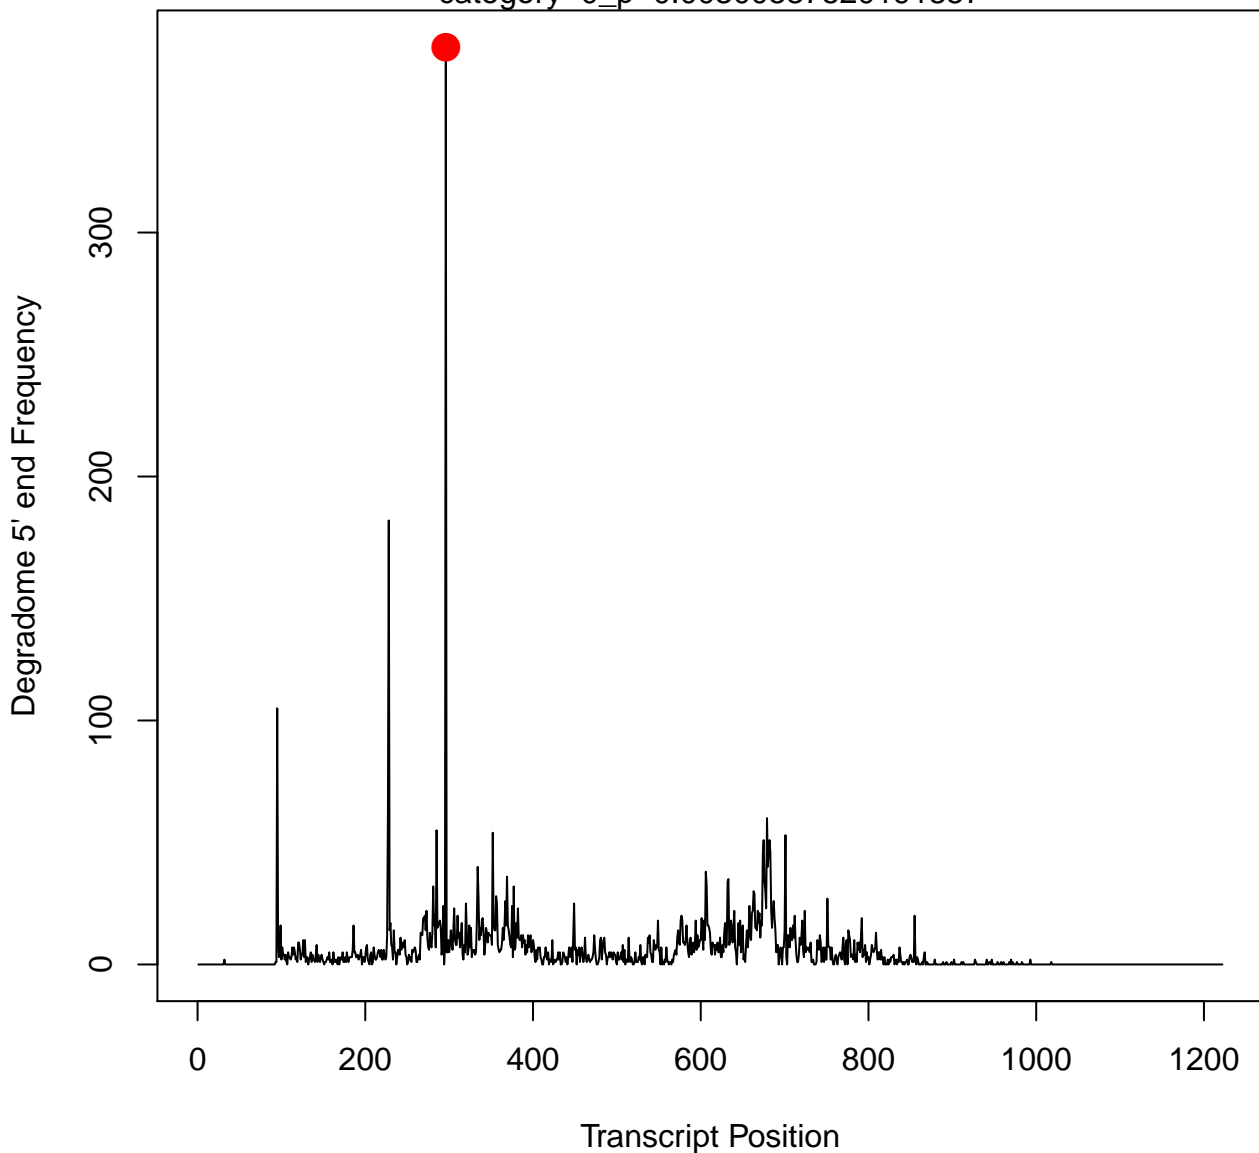

Supplement: s1 [file s1]

**T=Cluster-18410.68235\_Q=novel\_2\_S=292**

category=2\_p=0.0992668787568005

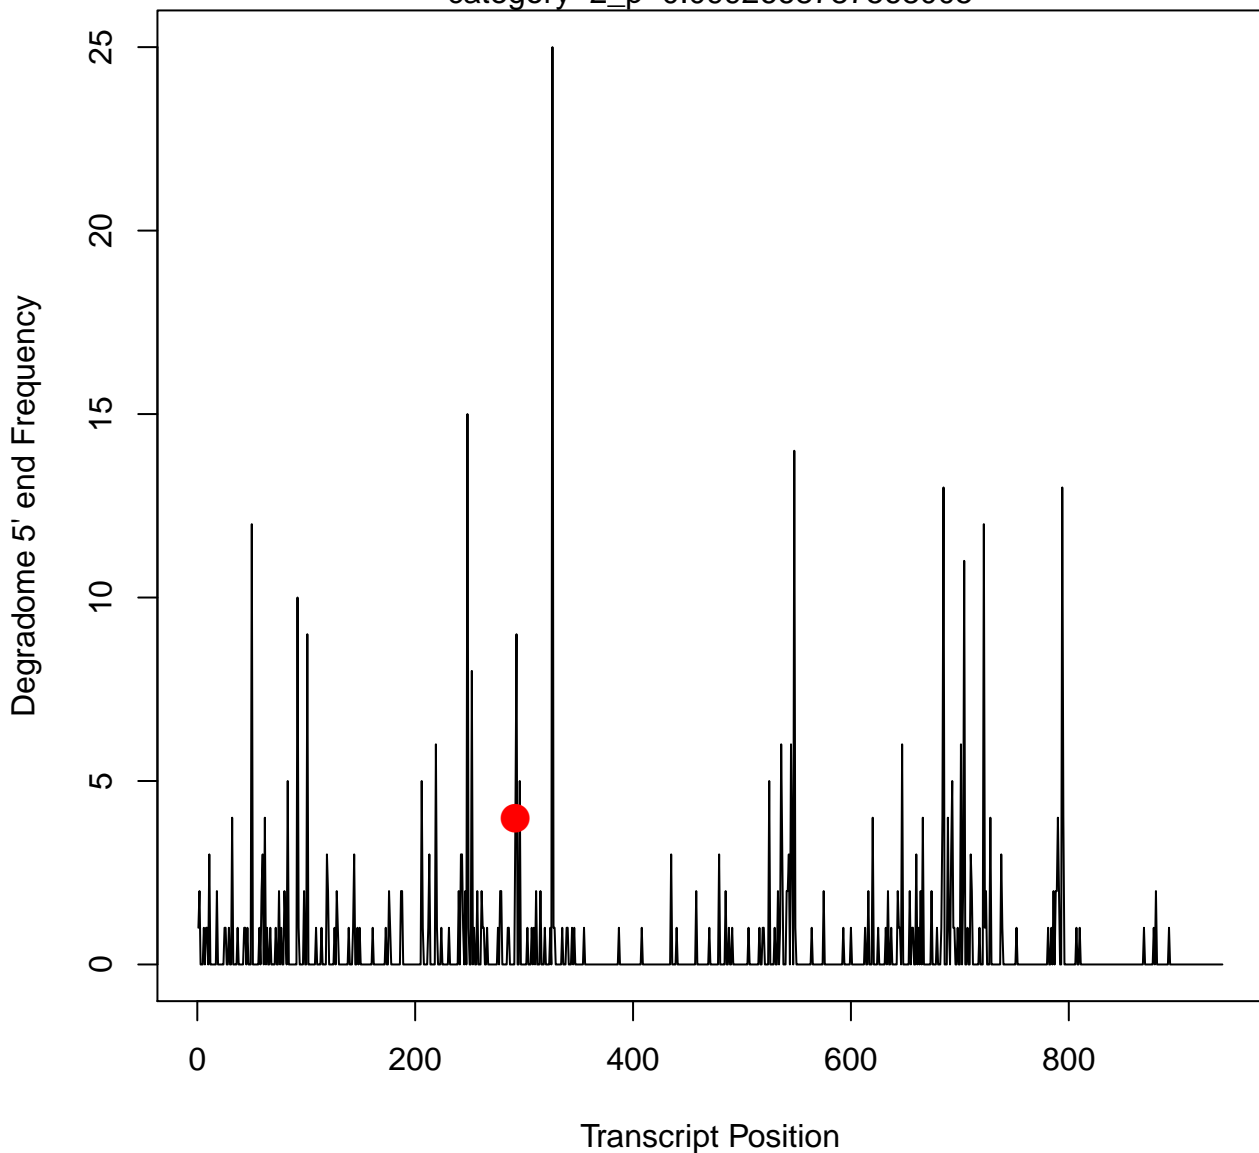

Supplement: s1 [file s1]

**T=Cluster-18410.118020\_Q=novel\_74\_S=559**

category=0\_p=0.0122377313407951

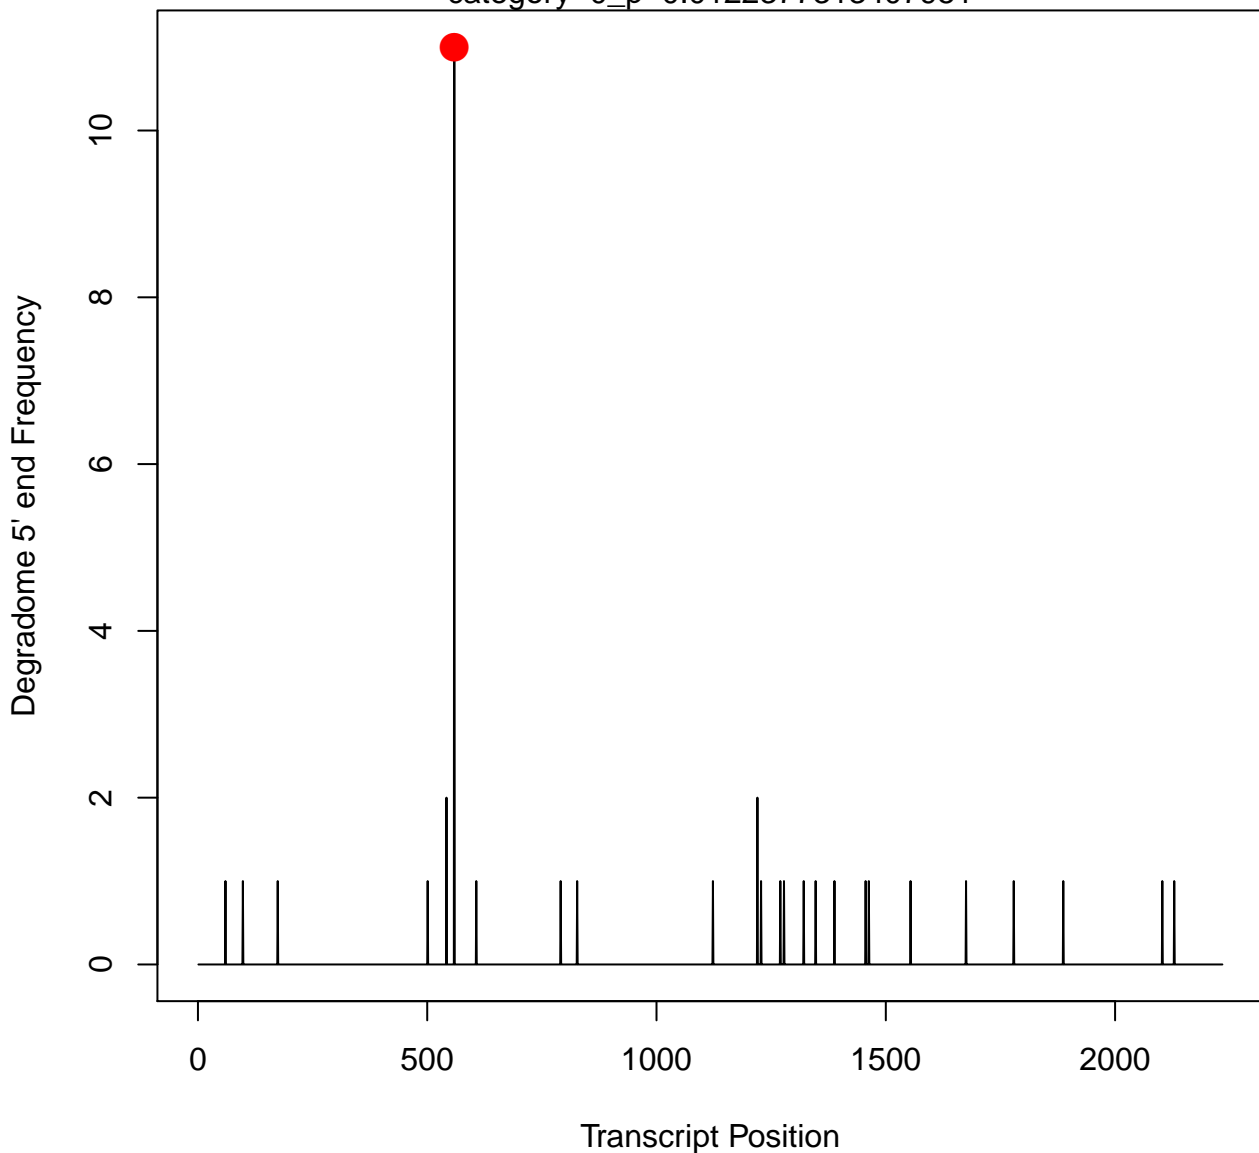

Supplement: s1 [file s1]

**T=Cluster-18410.4536\_Q=novel\_25\_S=265**

category=0\_p=0.00681733854218258

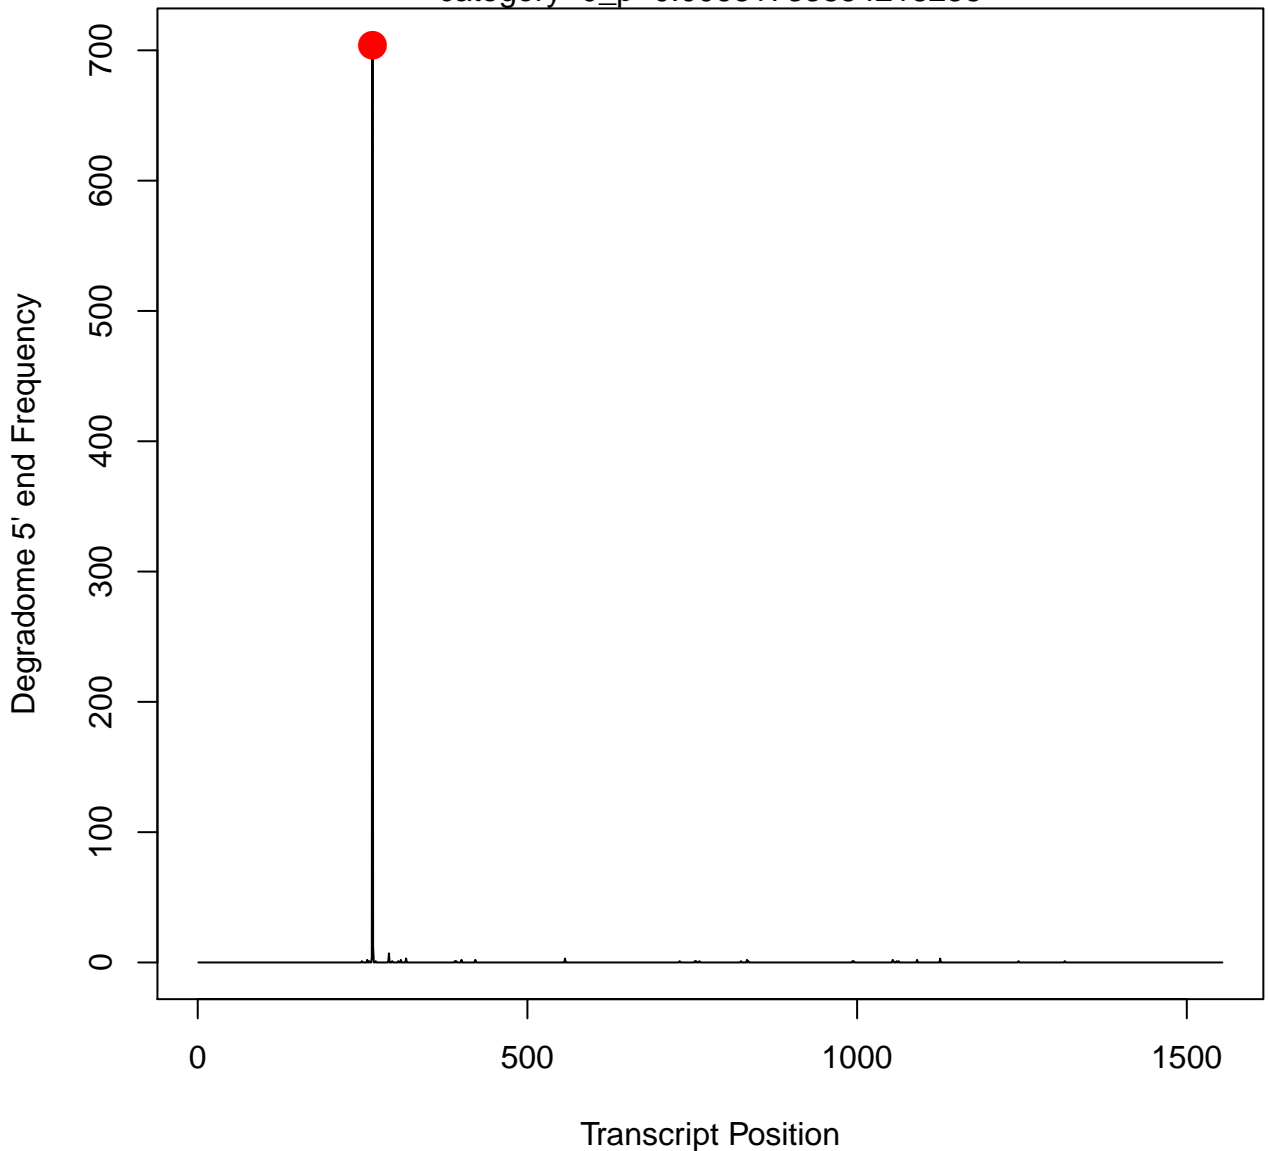

Supplement: s1 [file s1]

**T=Cluster-18410.69757\_Q=novel\_42\_S=1384**

category=0\_p=0.00164041690342198

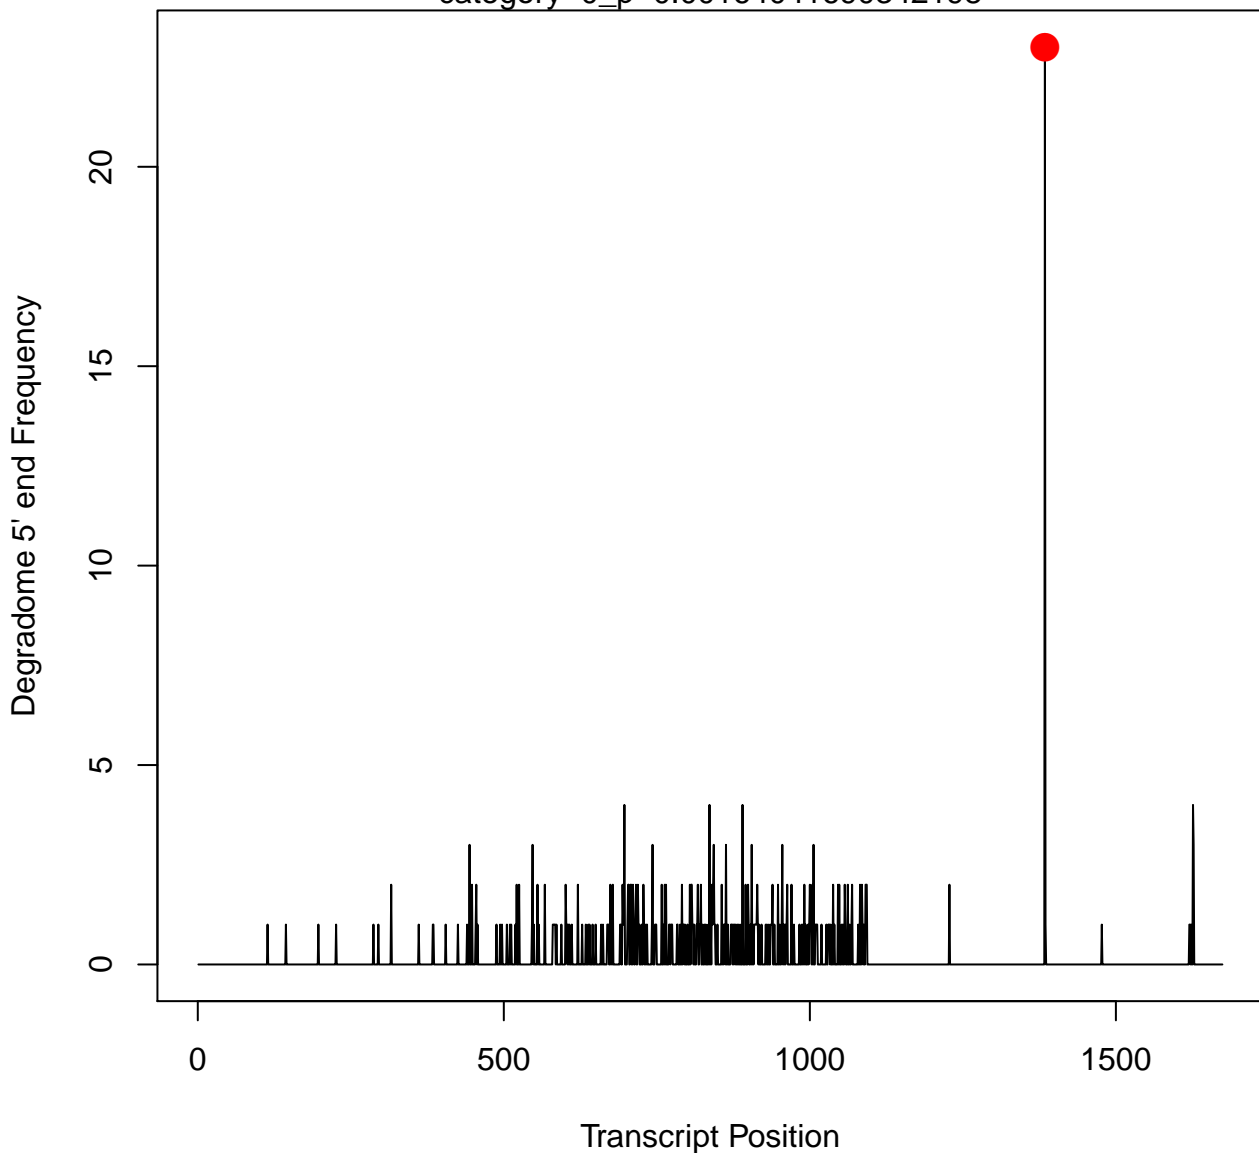

Supplement: s1 [file s1]

**T=Cluster-14530.0\_Q=pma-miR951\_S=367**

category=0\_p=0.0227225581783234

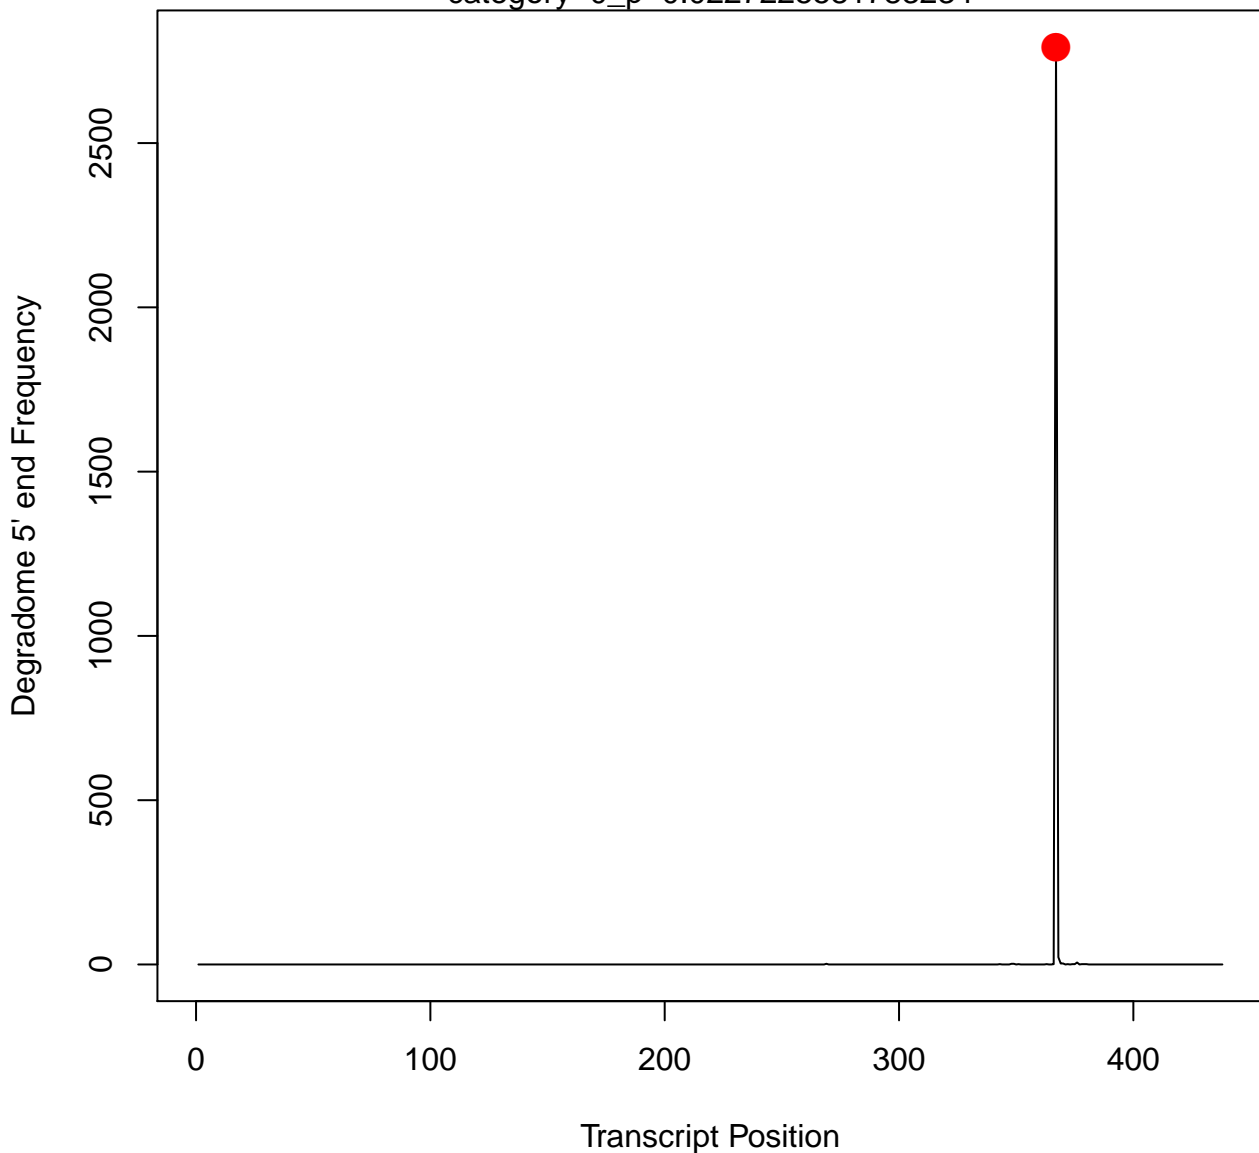

Supplement: s1 [file s1]

**T=Cluster-18410.90824\_Q=novel\_16\_S=1409**

category=0\_p=0.00136720107825572

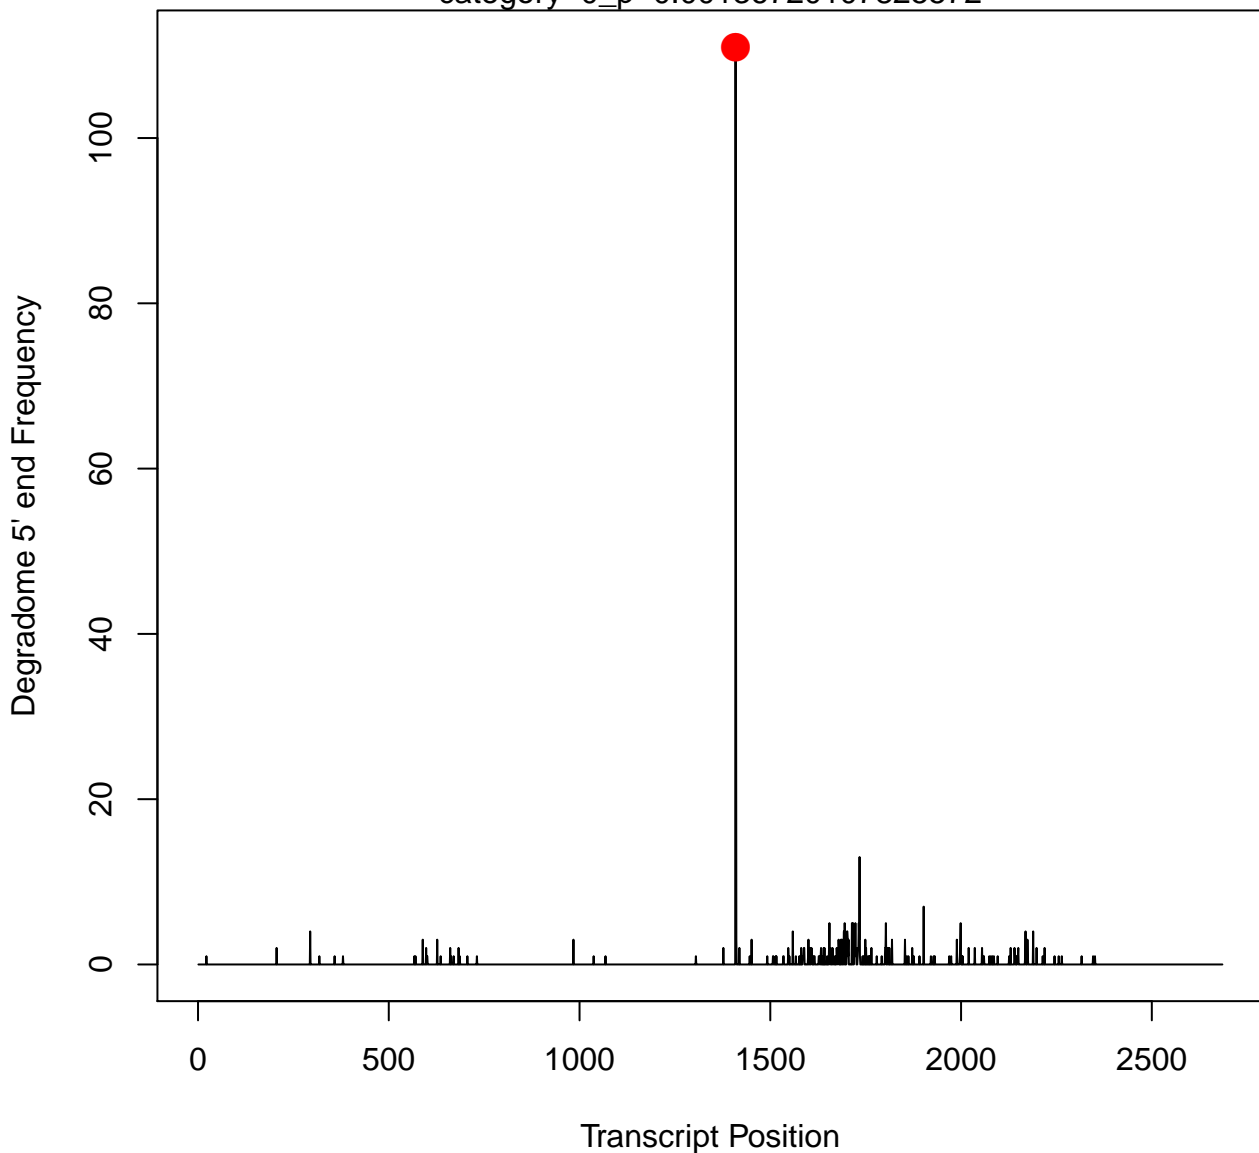

Supplement: s1 [file s1]

**T=Cluster-18410.46128\_Q=novel\_42\_S=365**

category=0\_p=0.00382345425486719

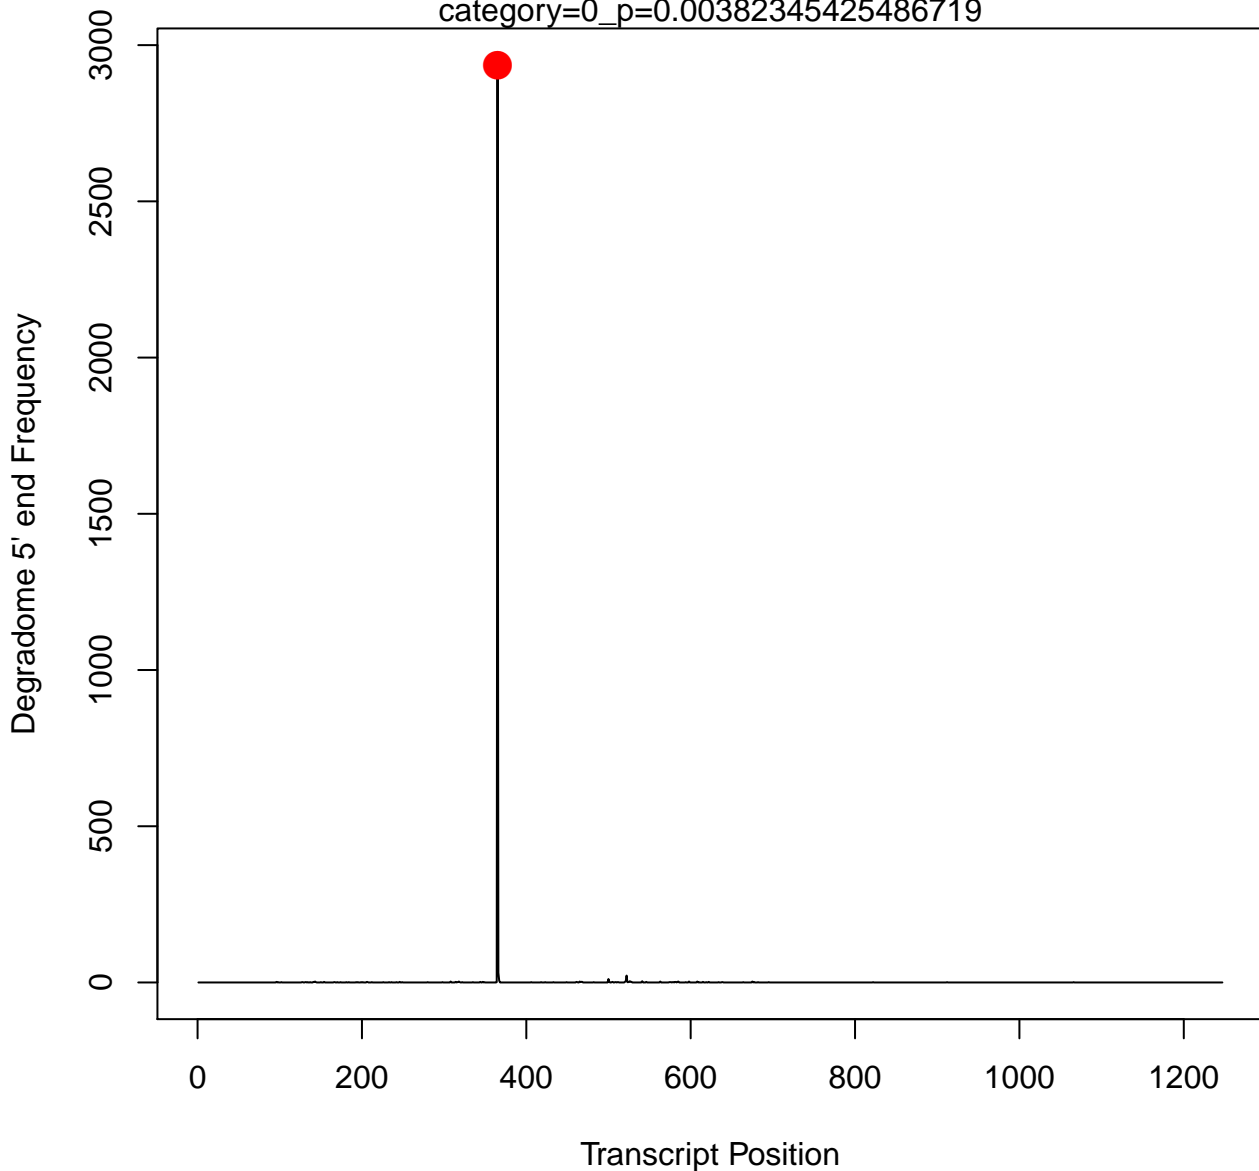

Supplement: s1 [file s1]

**T=Cluster-18410.117206\_Q=novel\_8\_S=470**

category=2\_p=0.0887427285779705

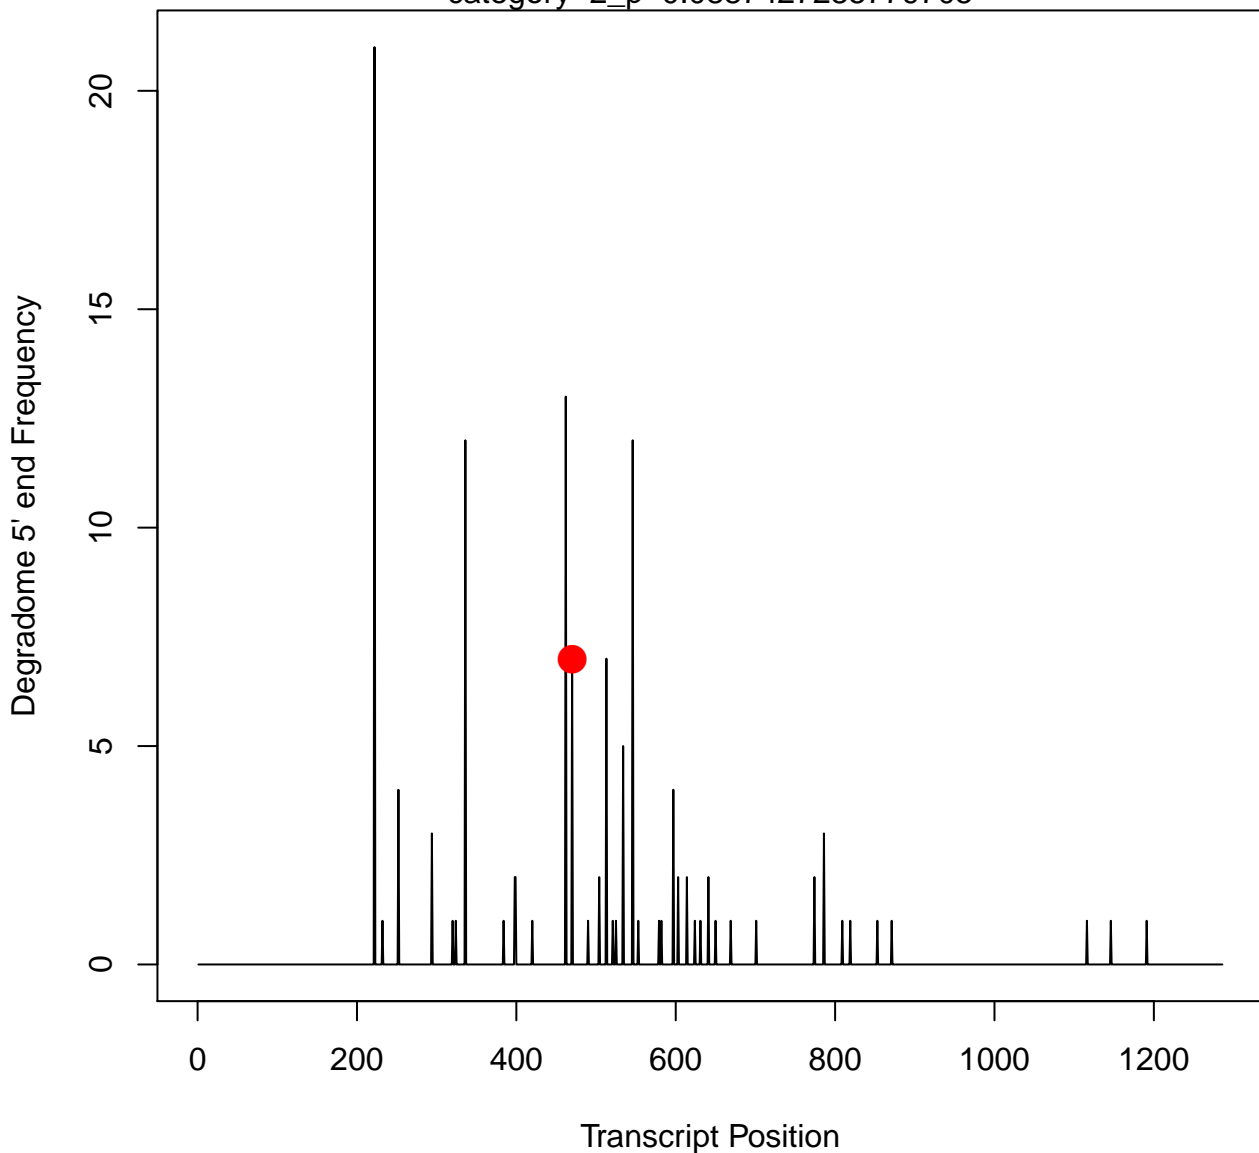

Supplement: s1 [file s1]

**T=Cluster-18410.81257\_Q=novel\_148\_S=21**

category=0\_p=0.00464086203705827

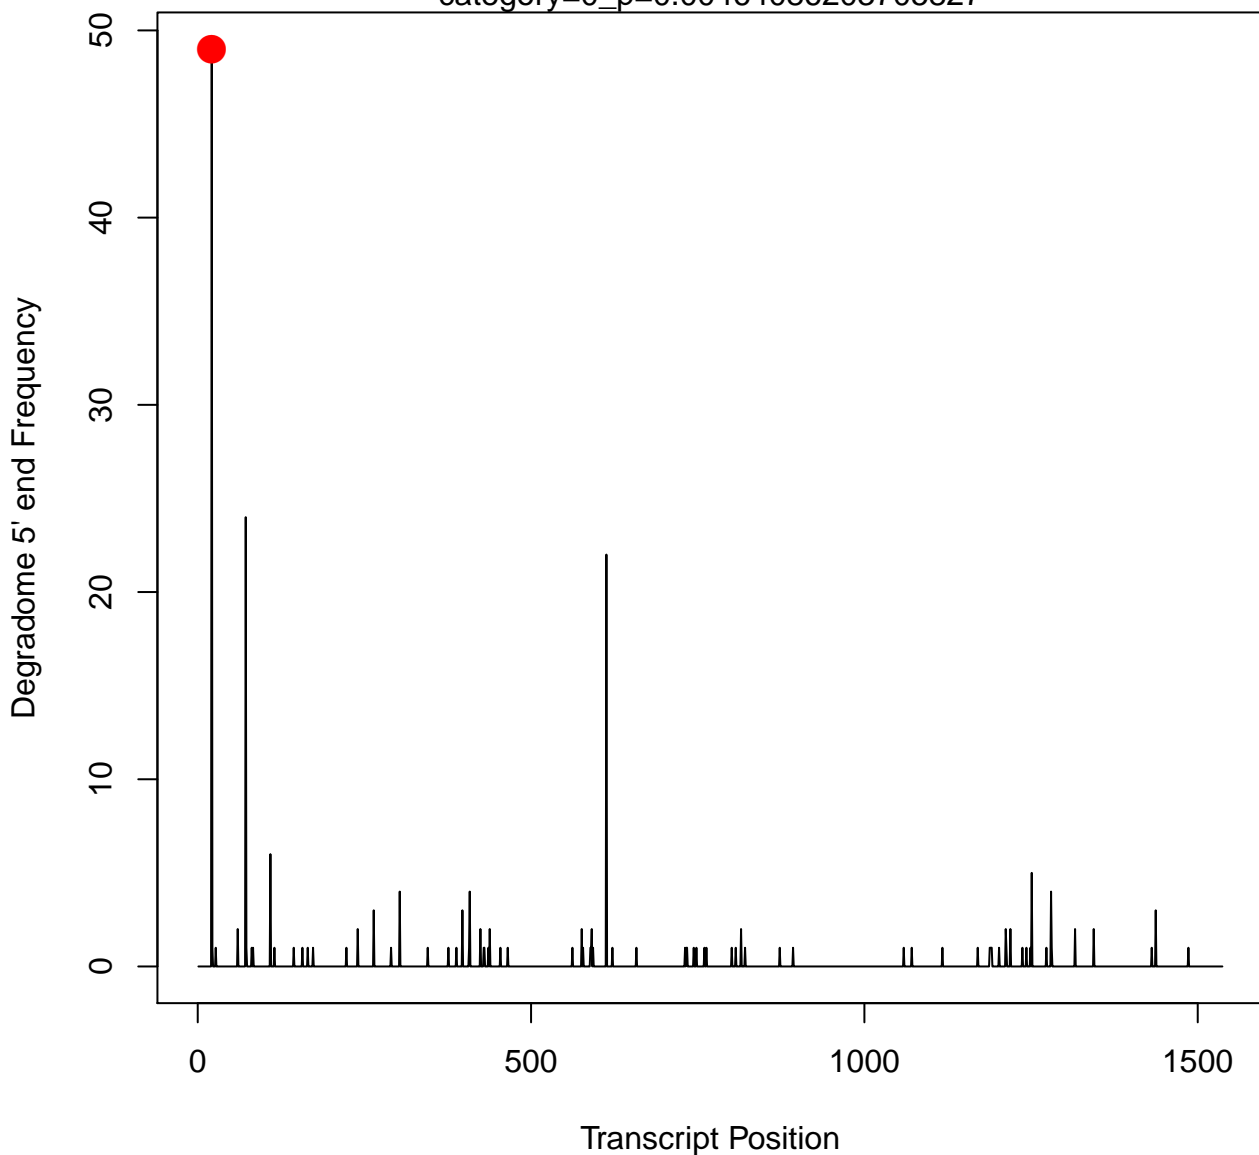

Supplement: s1 [file s1]

**T=Cluster-18410.78685\_Q=novel\_172\_S=613**

category=2\_p=0.0780956144108357

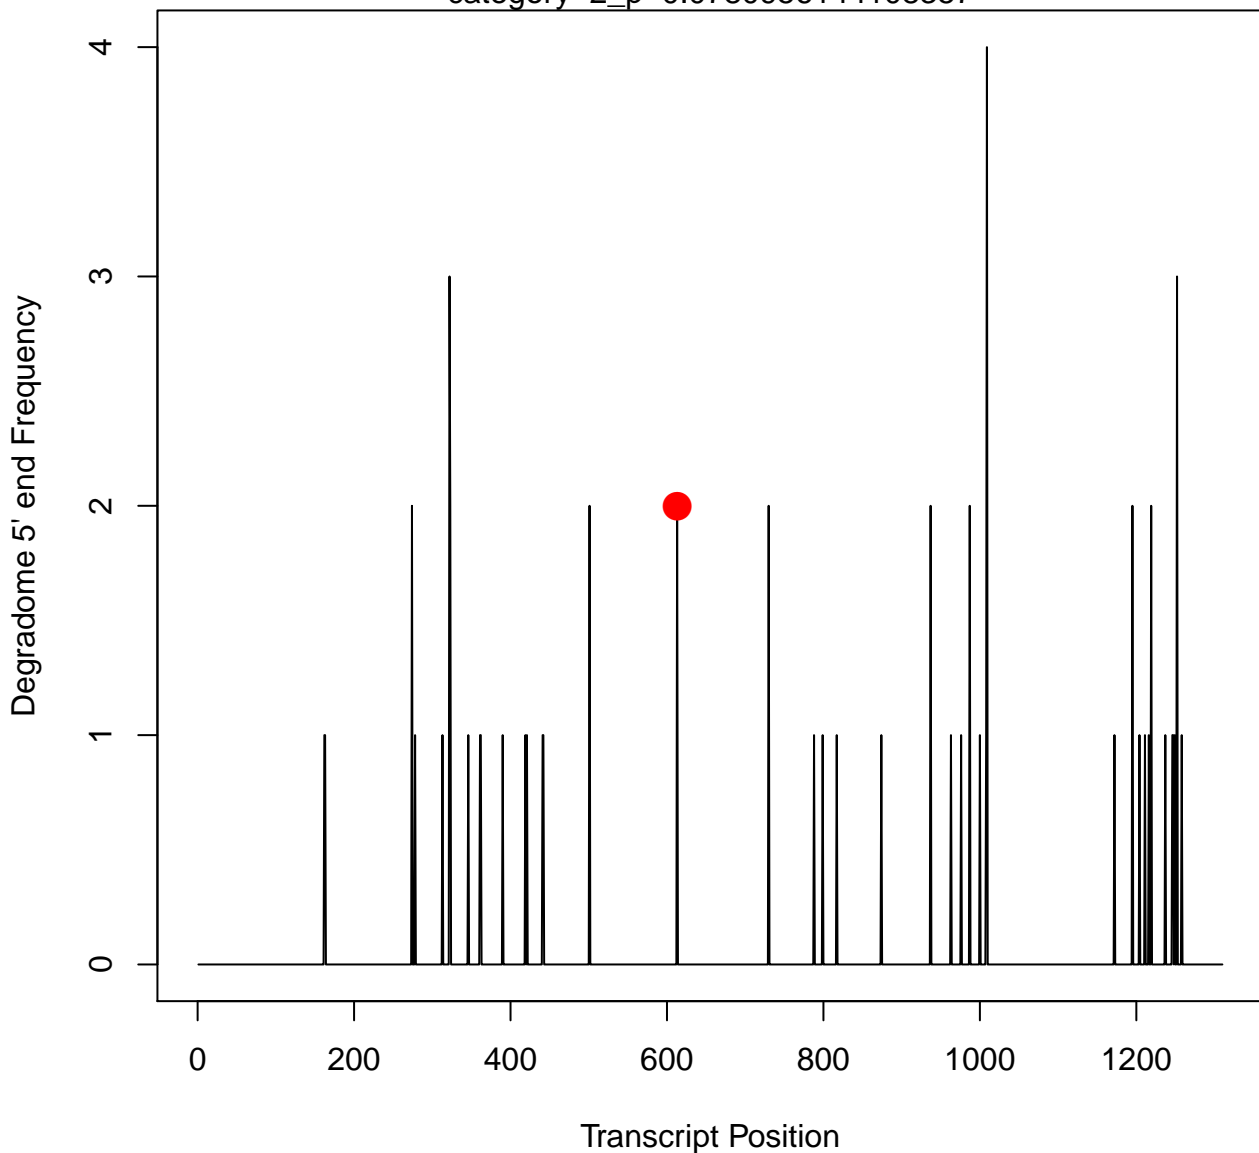

Supplement: s1 [file s1]

**T=Cluster-18410.60884\_Q=novel\_127\_S=447**

category=3\_p=0.0161518376349161

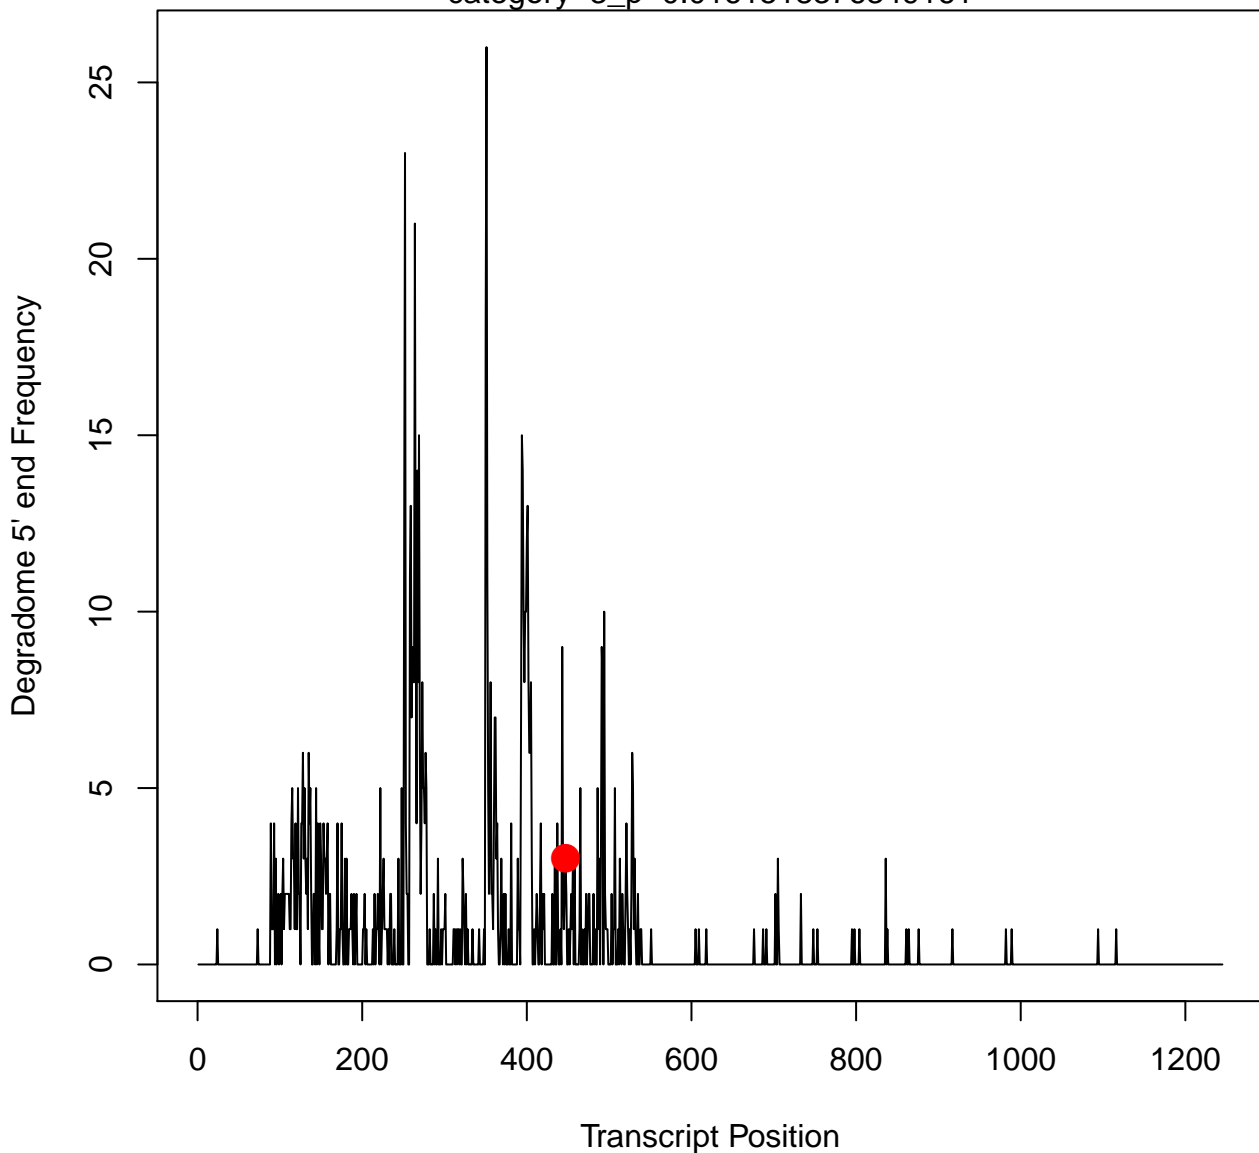

Supplement: s1 [file s1]

**T=Cluster-18410.25445\_Q=novel\_167\_S=151**

category=2\_p=0.0992668787568005

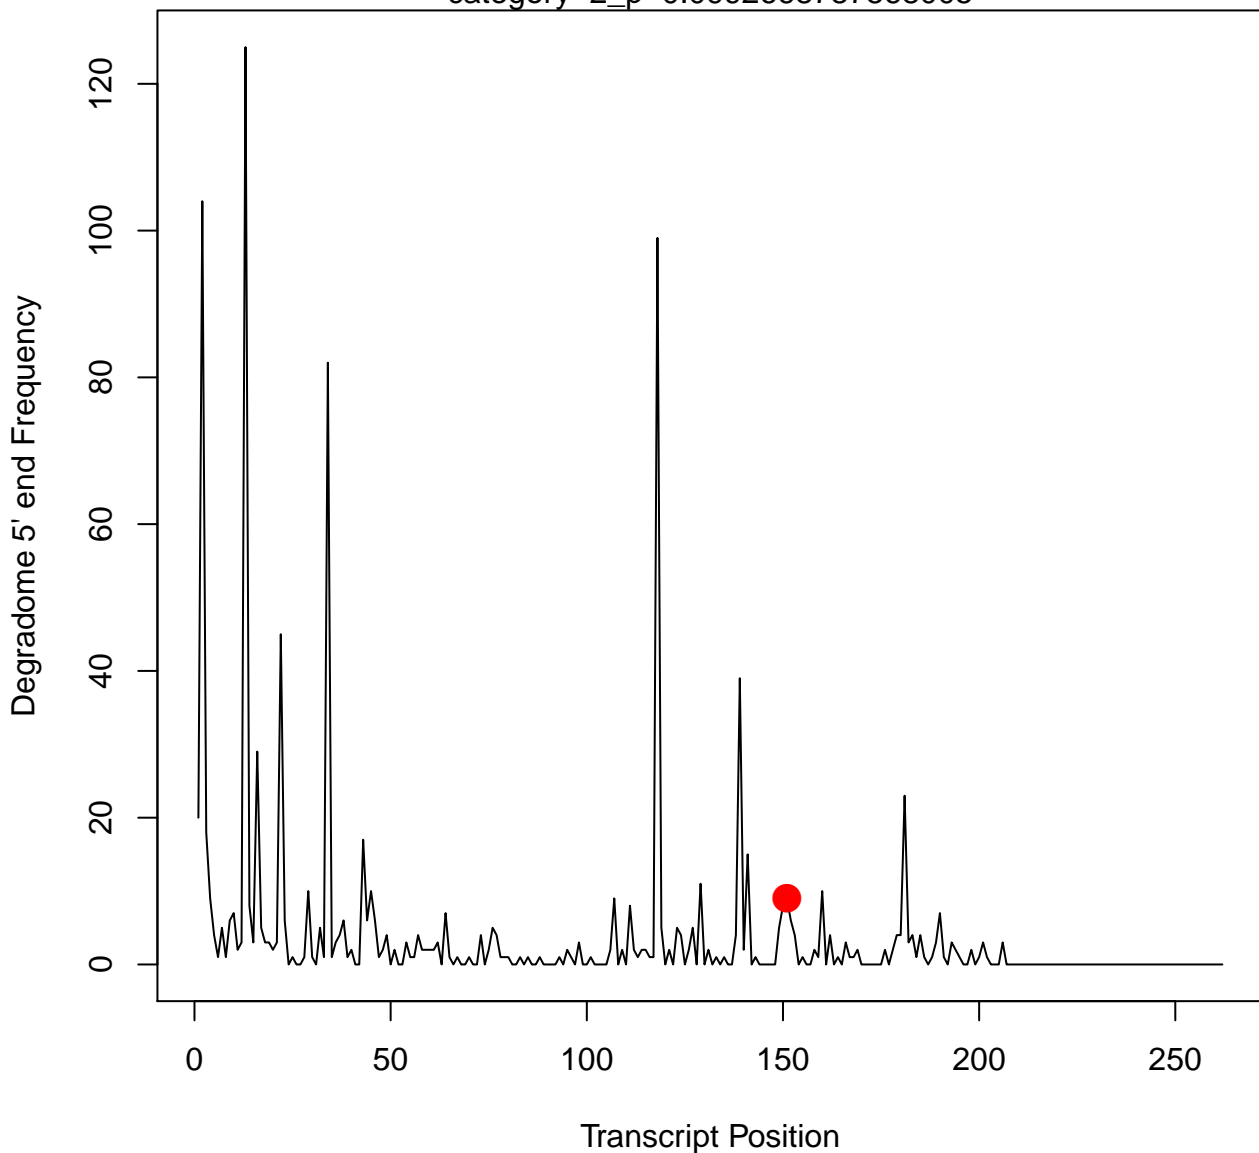

Supplement: s1 [file s1]

**T=Cluster-18410.24623\_Q=novel\_114\_S=1207**

category=0\_p=0.00898905591083365

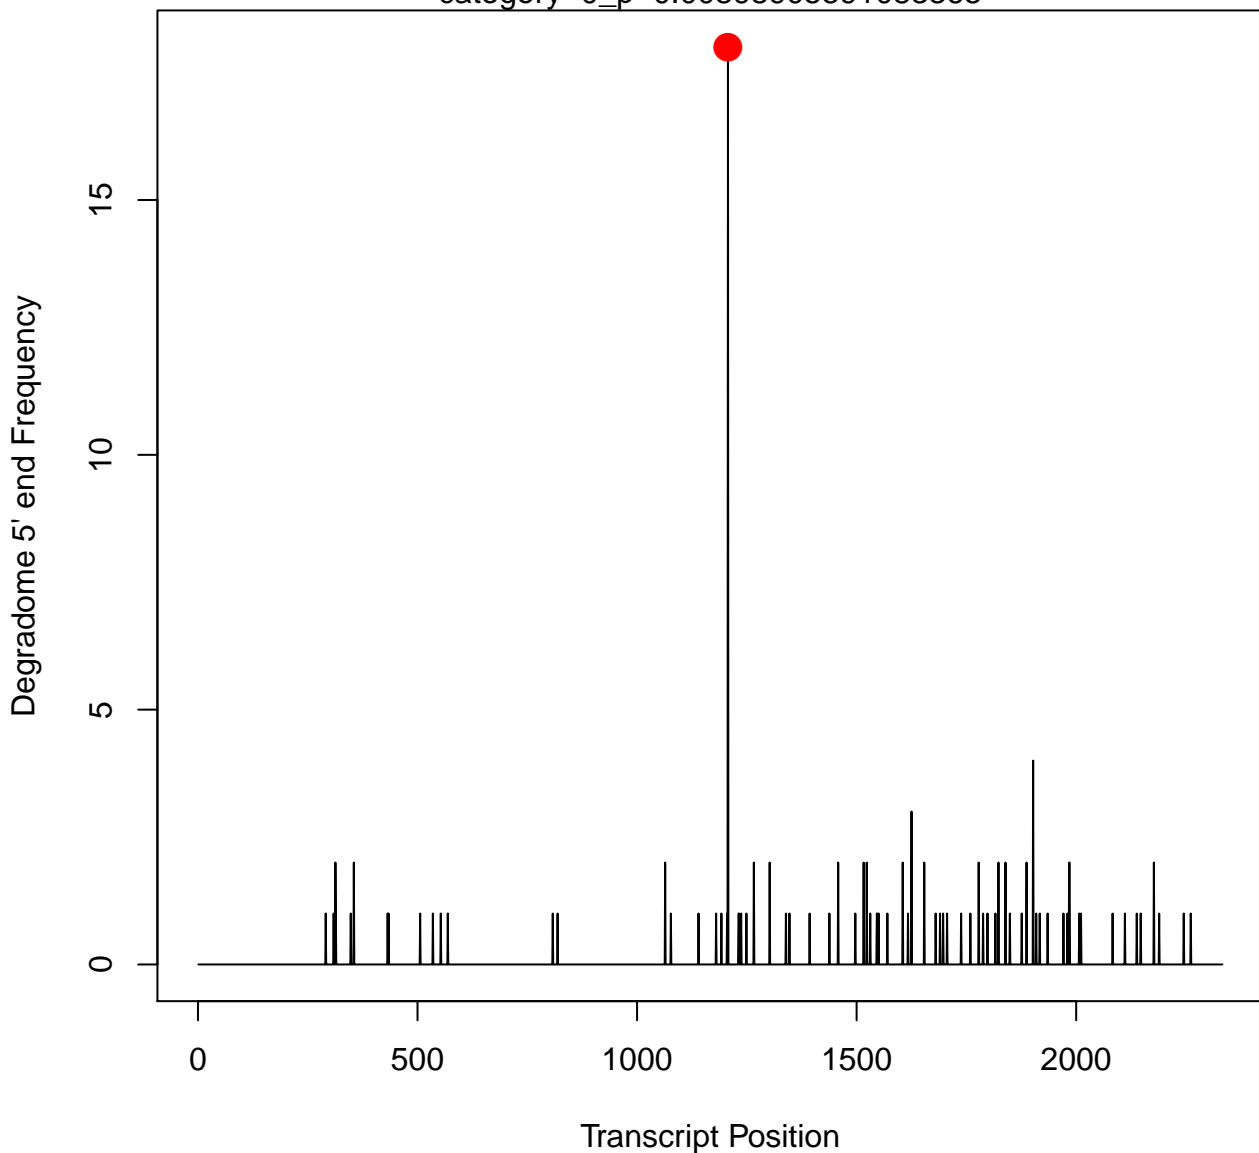

Supplement: s1 [file s1]

**T=Cluster-18410.1904\_Q=pma-miR482a\_S=185**

category=0\_p=0.00898905591083365

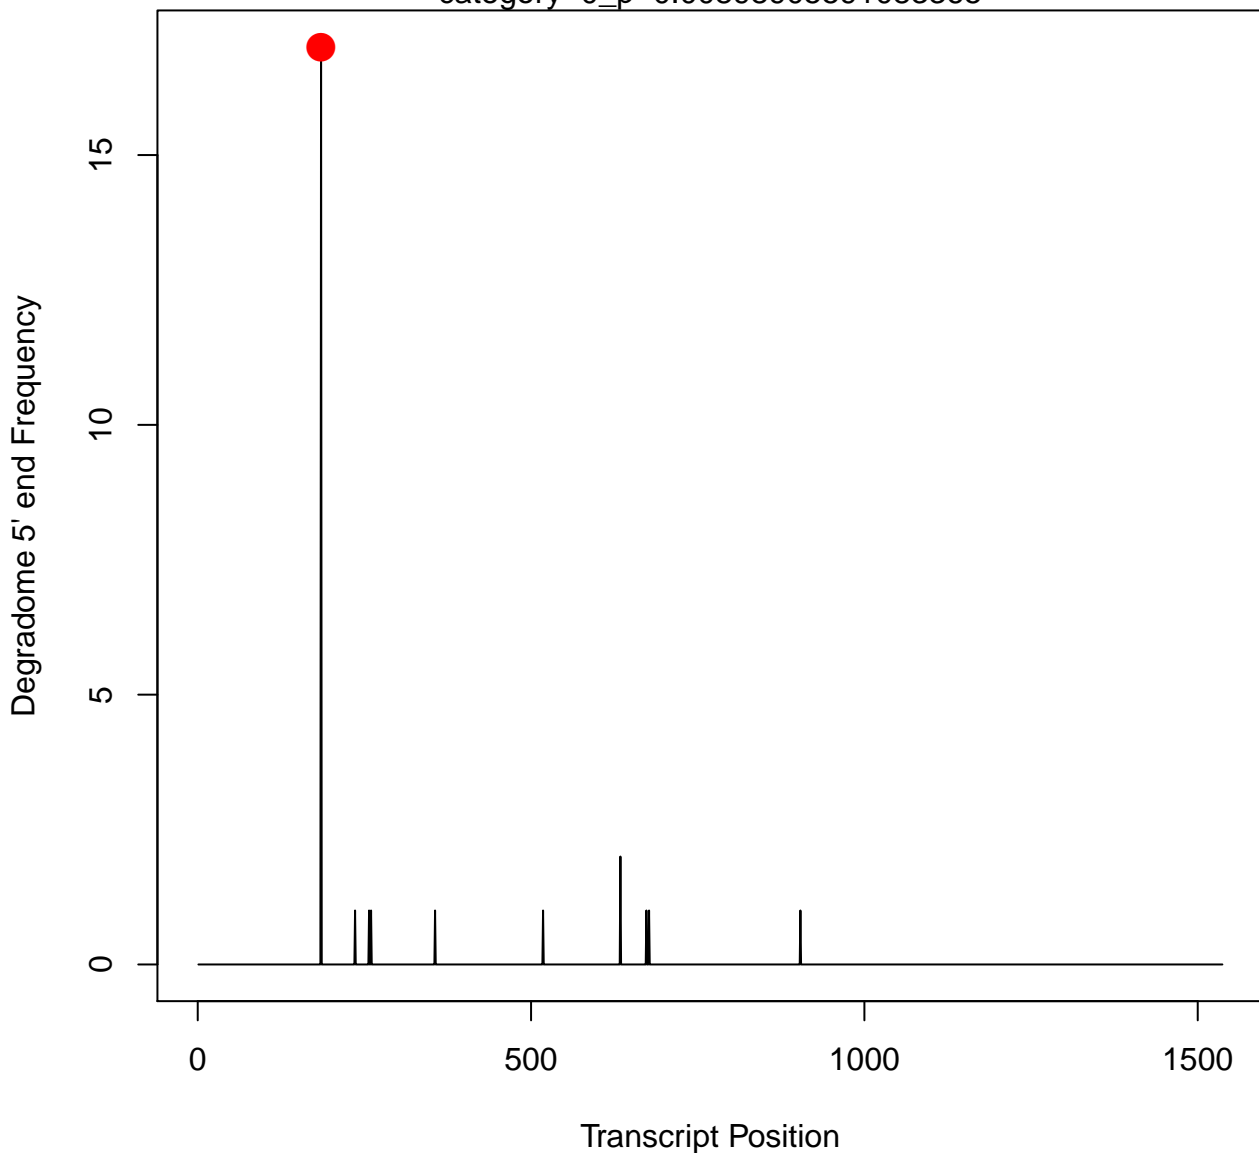

Supplement: s1 [file s1]

**T=Cluster-18410.27420\_Q=novel\_28\_S=644**

category=2\_p=0.0229647072699788

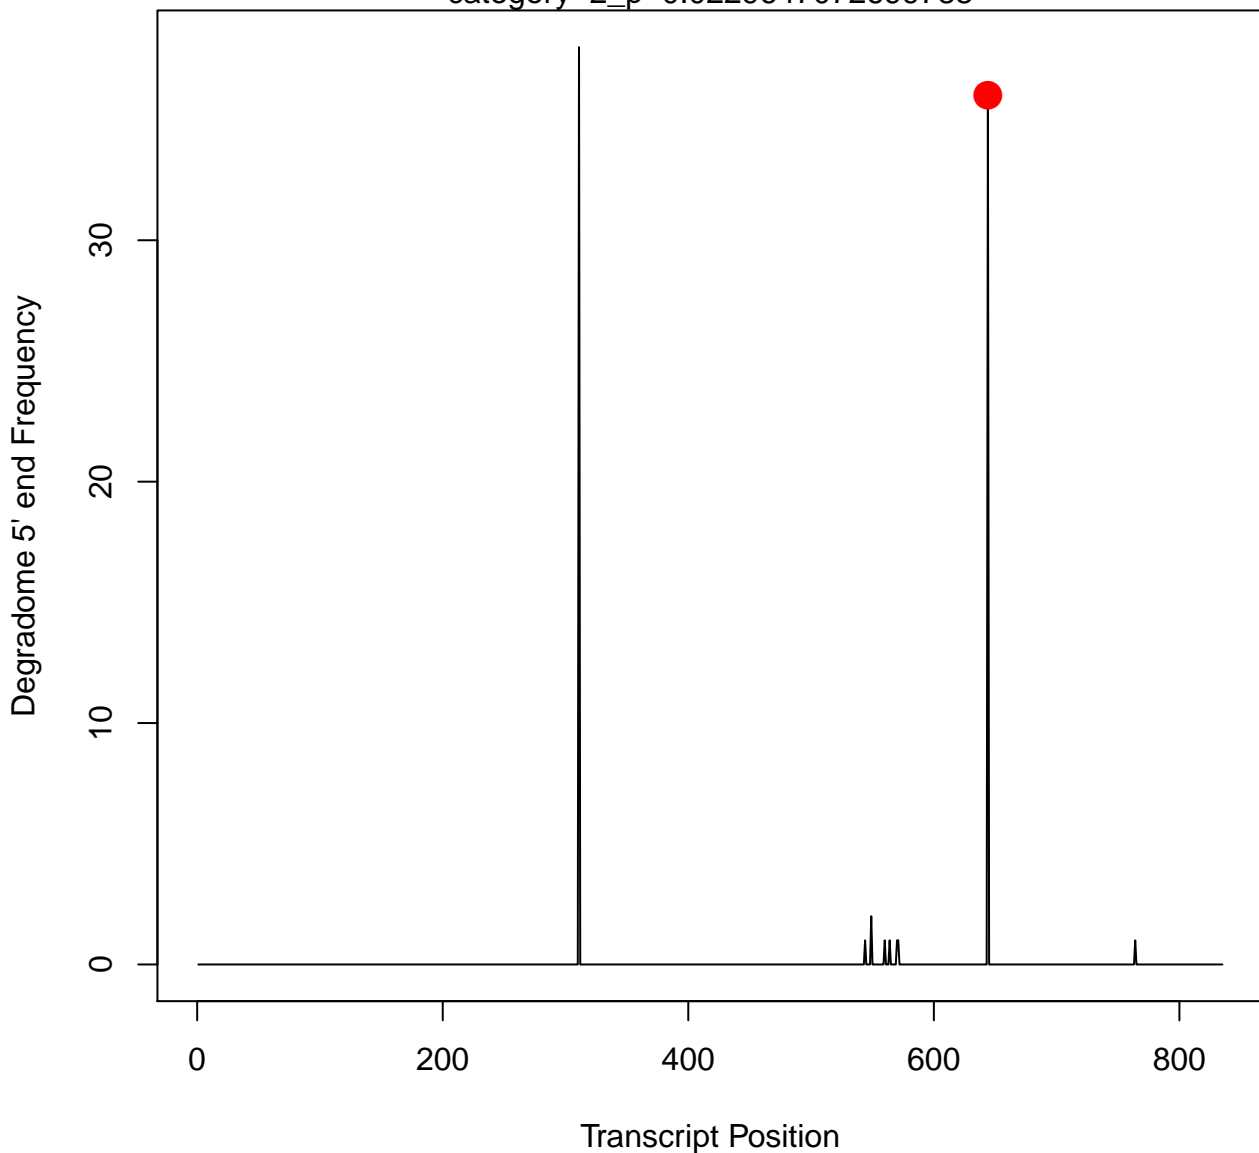

Supplement: s1 [file s1]

**T=Cluster-18410.61870\_Q=novel\_54\_S=51**

category=0\_p=0.0272579679577469

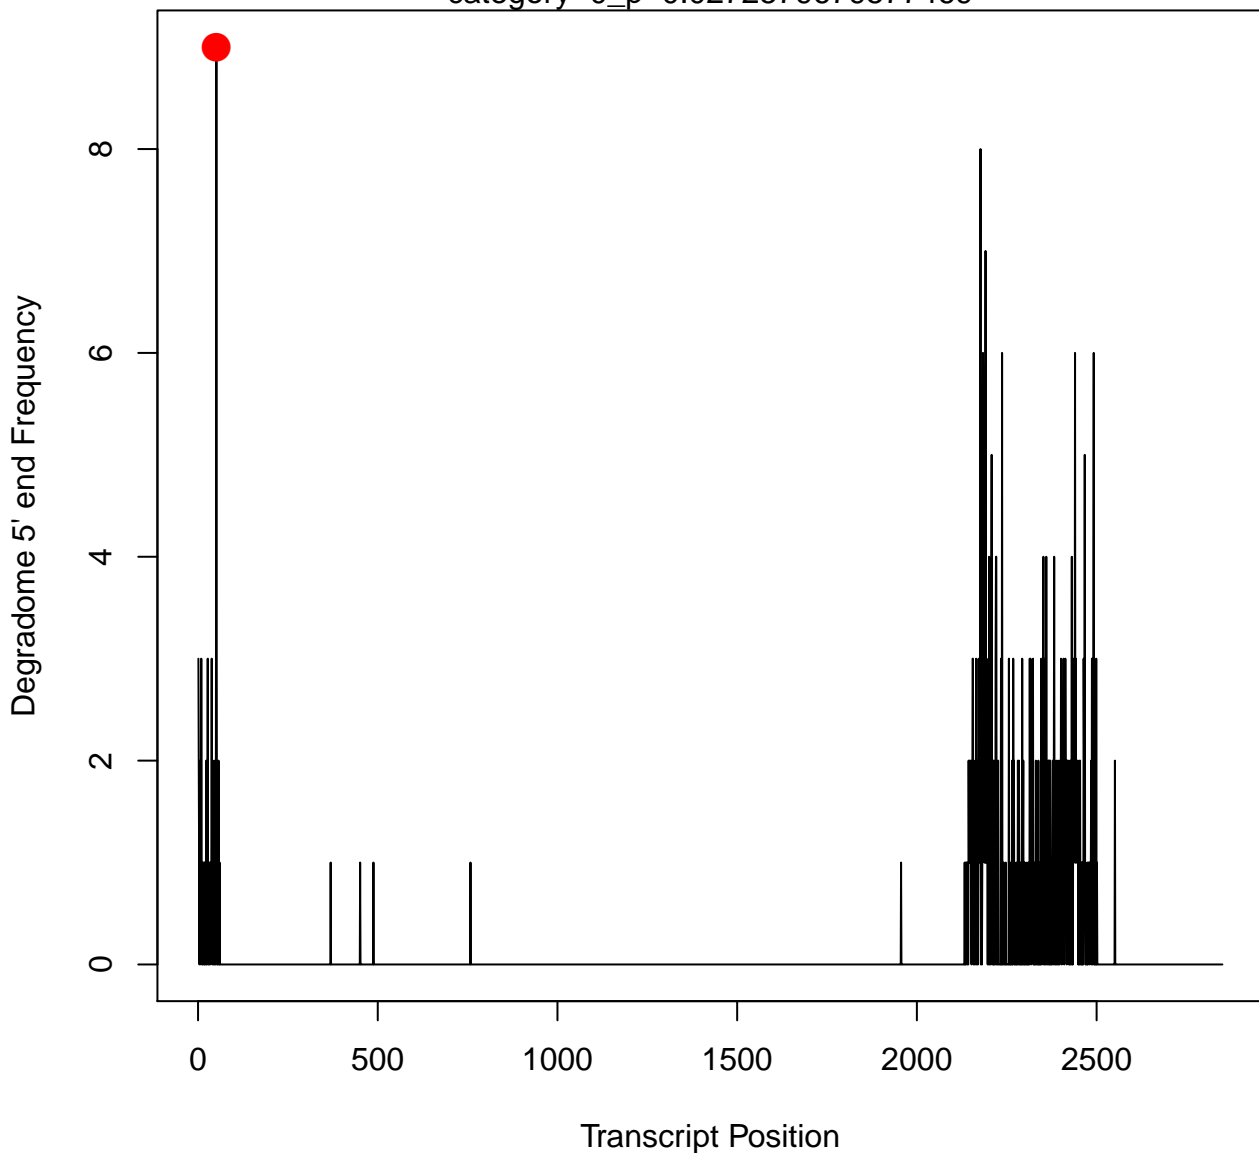

Supplement: s1 [file s1]

**T=Cluster-18410.56347\_Q=novel\_92\_S=1892**

category=0\_p=0.00027358987754178

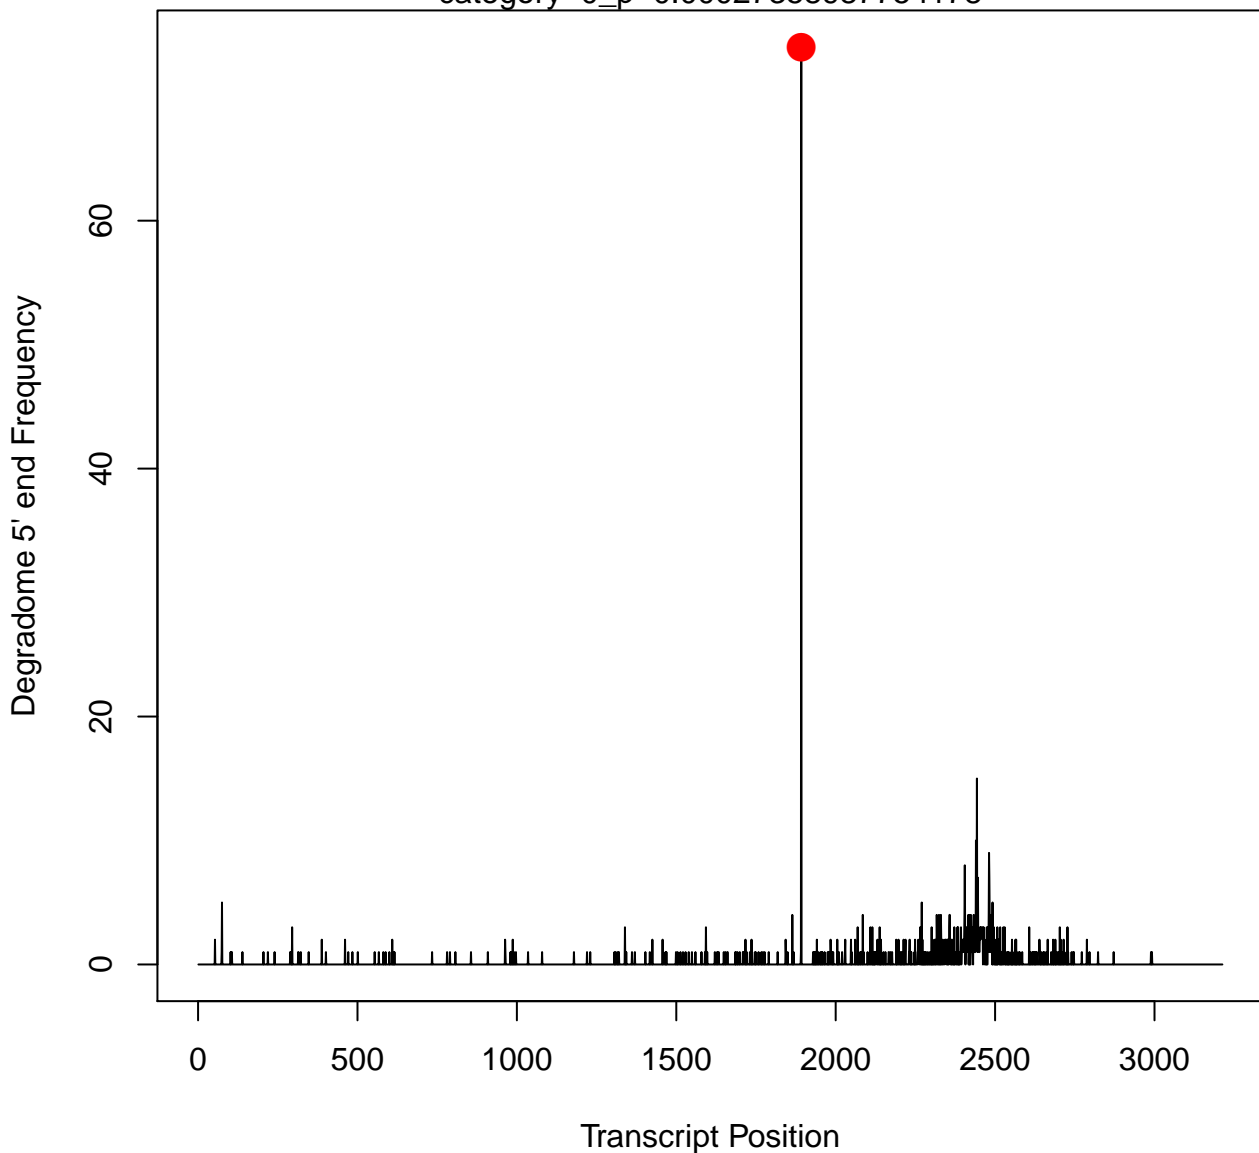

Supplement: s1 [file s1]

**T=Cluster-18410.65207\_Q=novel\_159\_S=796**

category=4\_p=0.0483072886549676

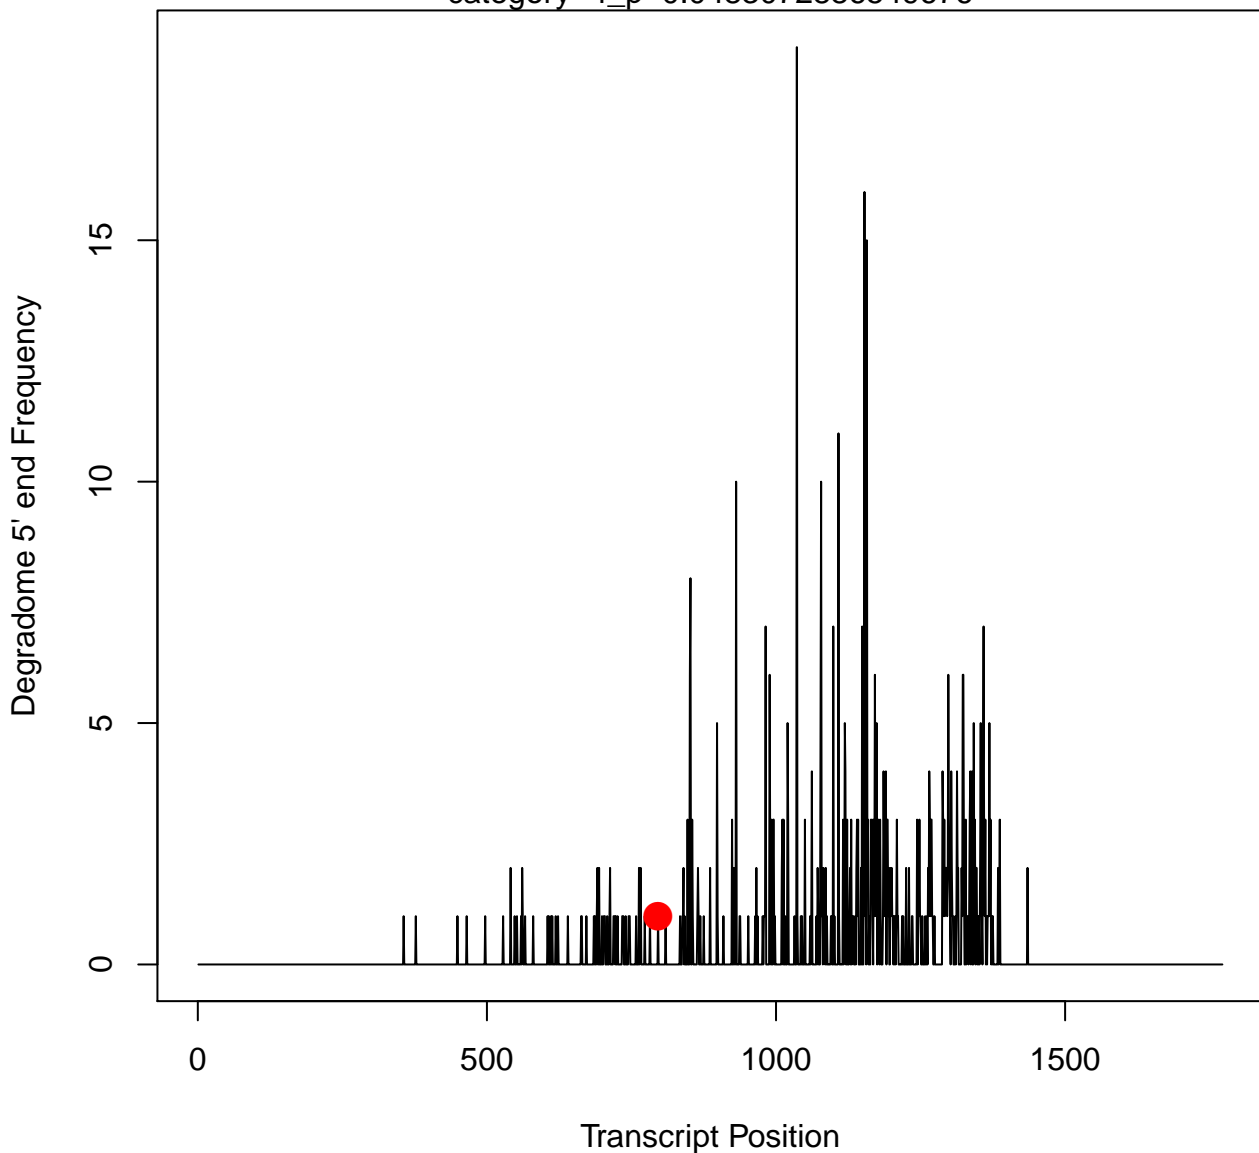

Supplement: s1 [file s1]

**T=Cluster-21701.0\_Q=novel\_9\_S=1118**

category=0\_p=0.00790379146763054

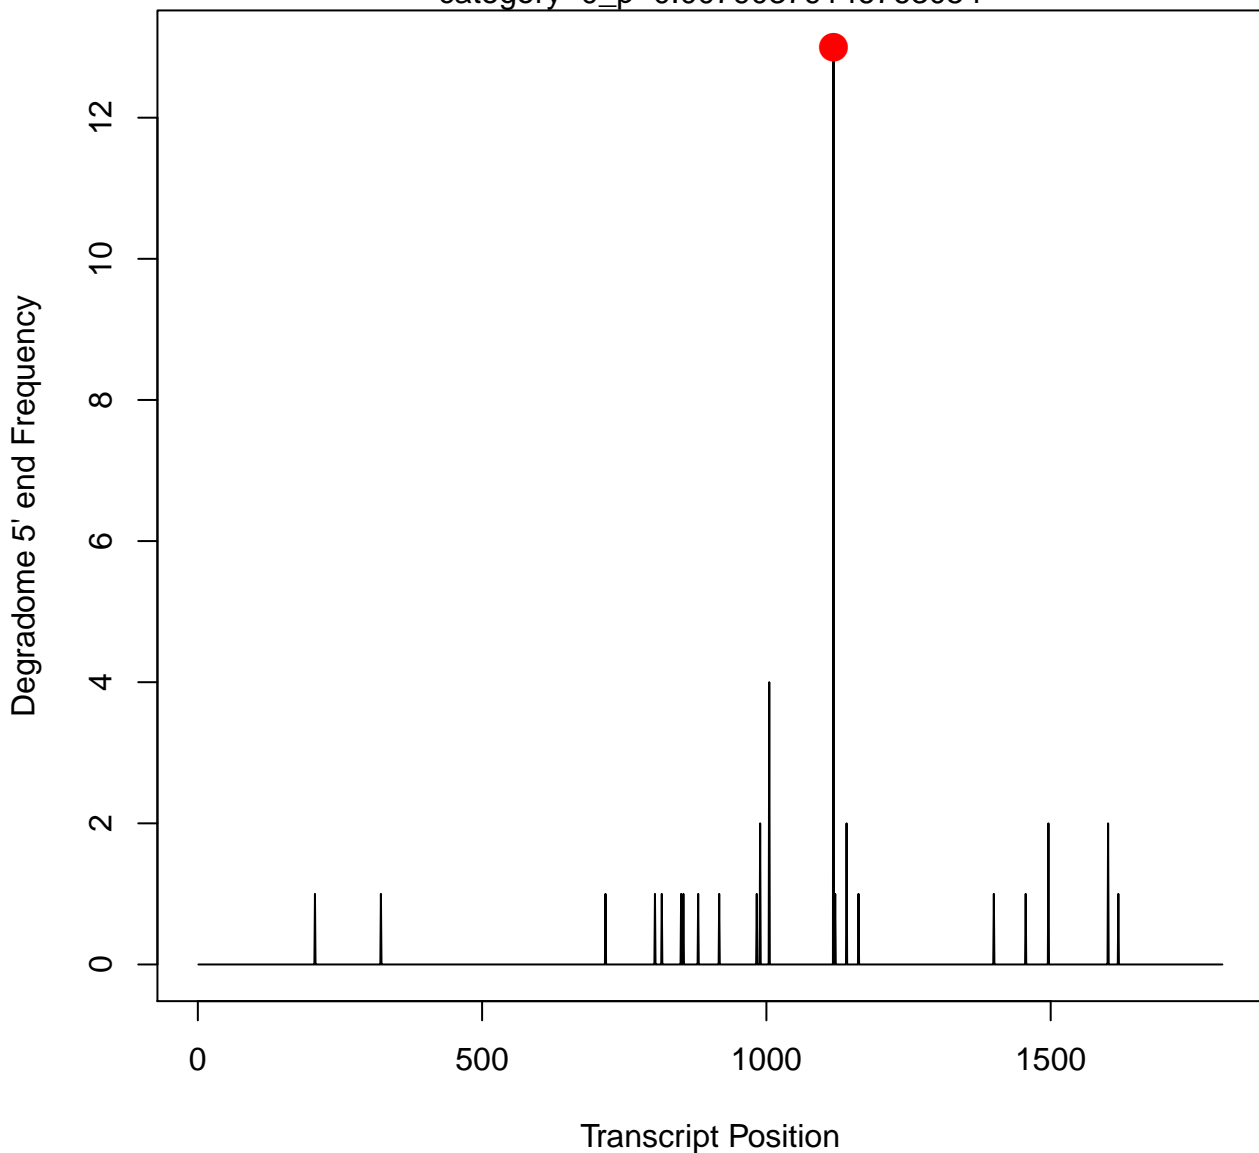

Supplement: s1 [file s1]

**T=Cluster-18410.25521\_Q=novel\_2\_S=38**

category=2\_p=0.0780956144108357

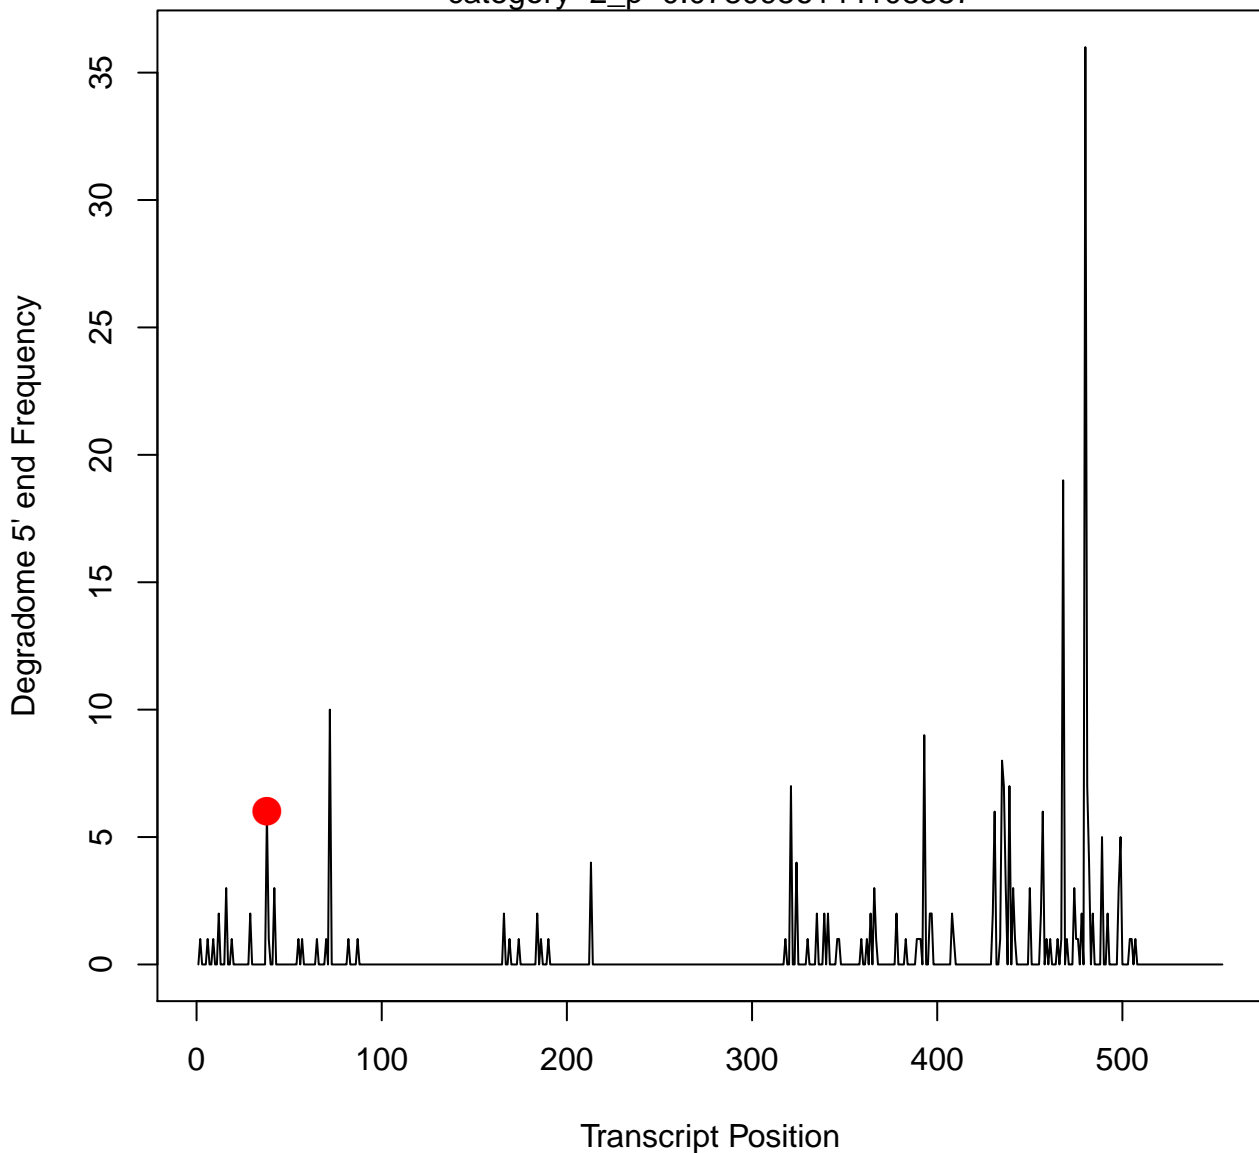

Supplement: s1 [file s1]

**T=Cluster-18410.100176\_Q=novel\_47\_S=378**

category=0\_p=0.00464086203705827

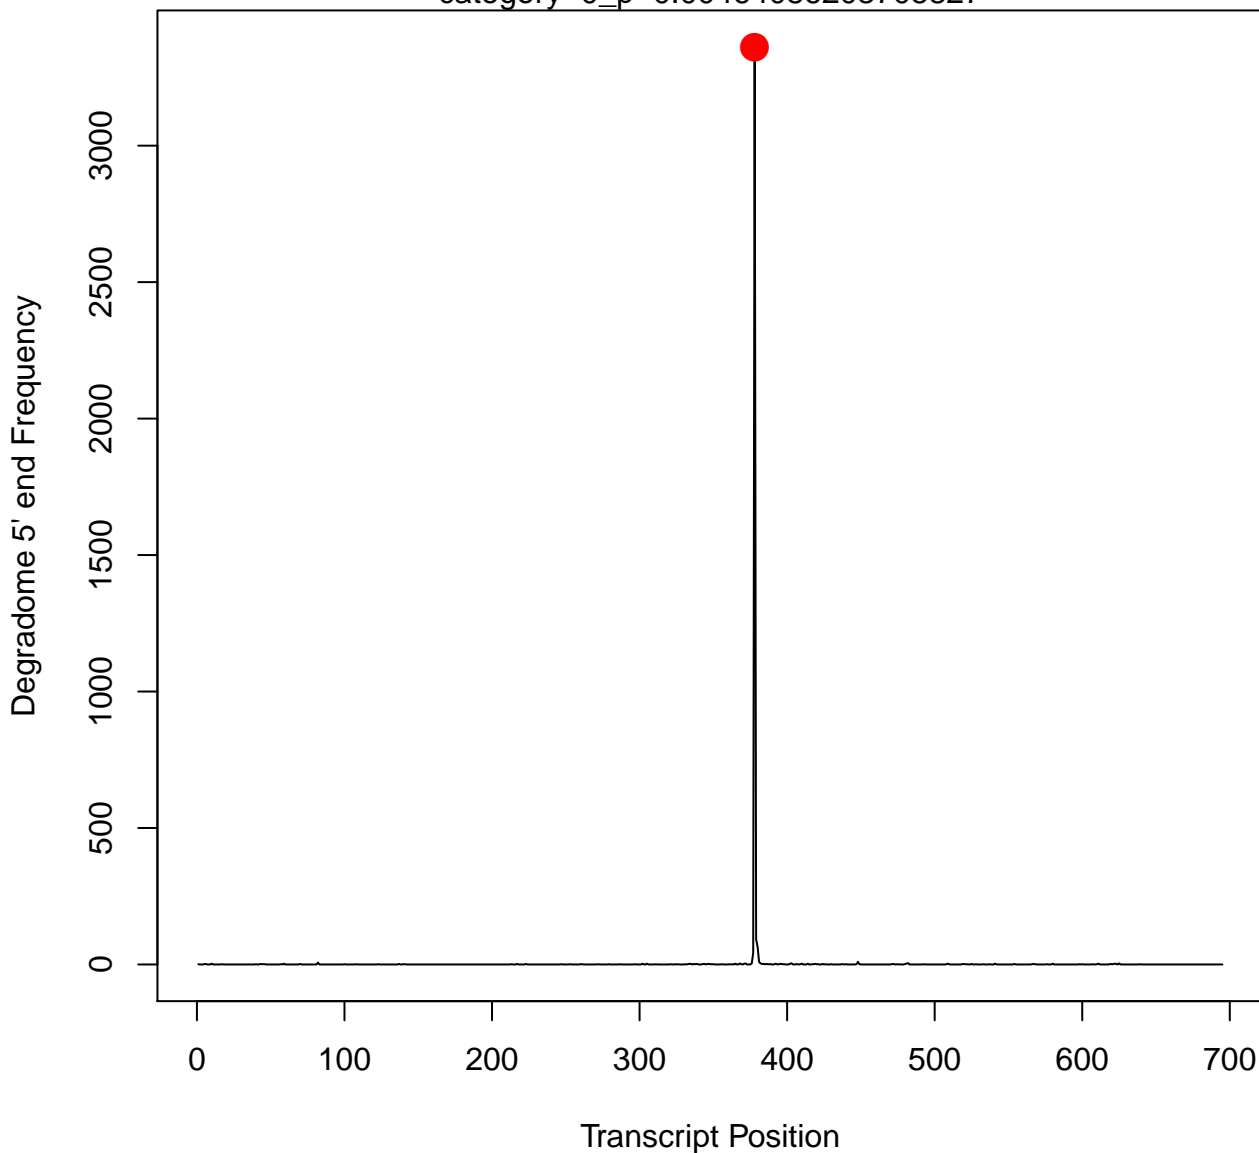

Supplement: s1 [file s1]

**T=Cluster-18410.6778\_Q=novel\_114\_S=1005**

category=2\_p=0.0229647072699788

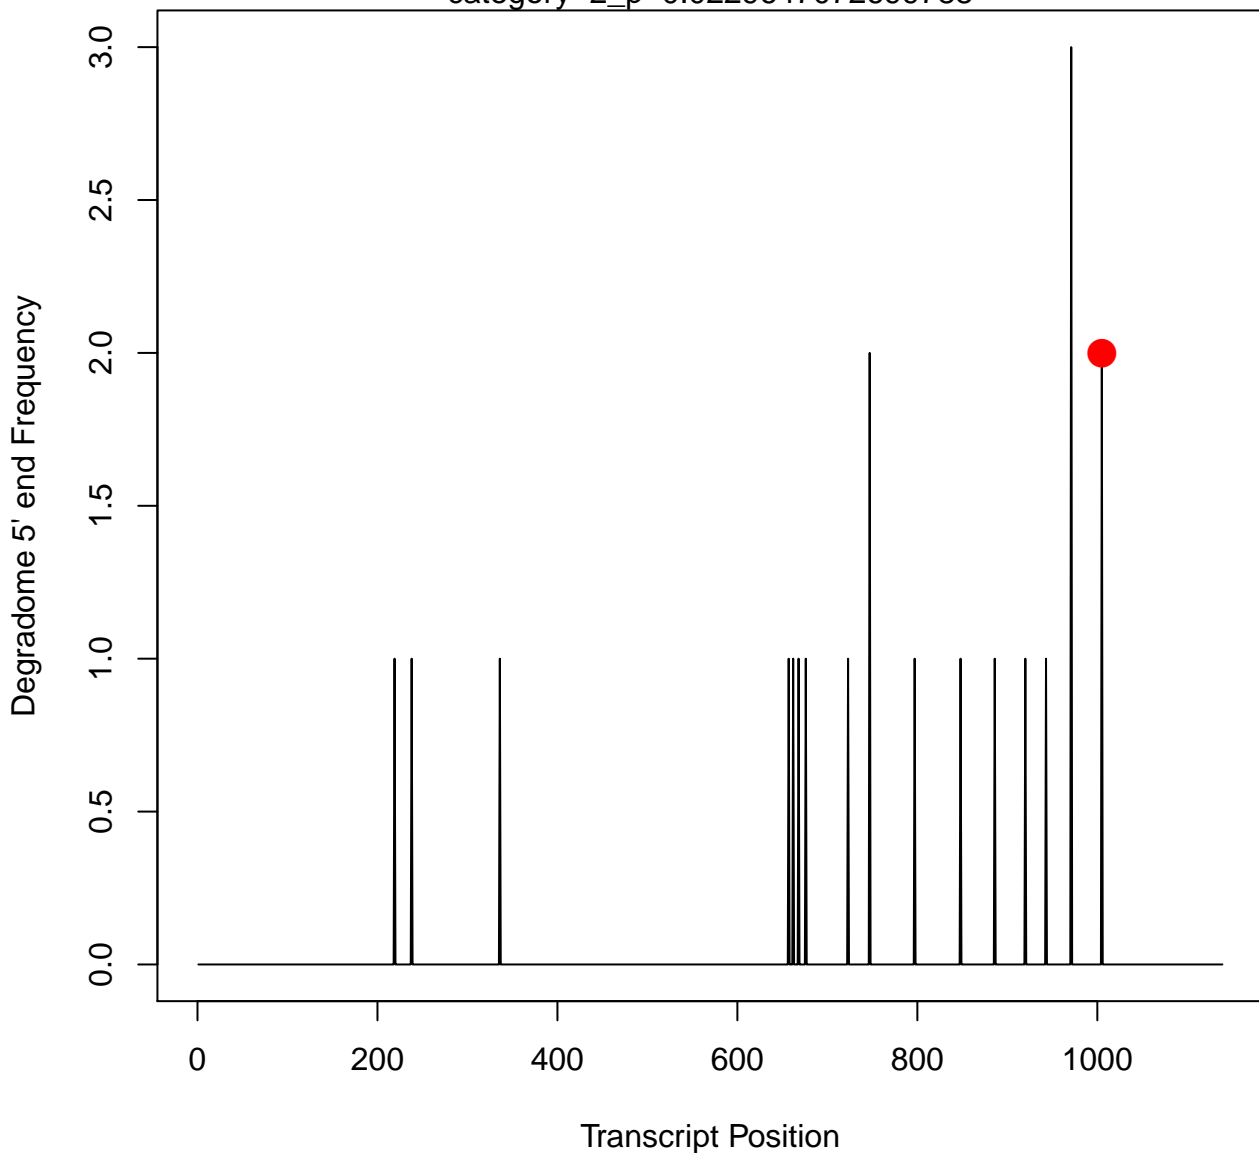

Supplement: s1 [file s1]

**T=Cluster-18410.34598\_Q=novel\_148\_S=437**

category=0\_p=0.0135882009795663

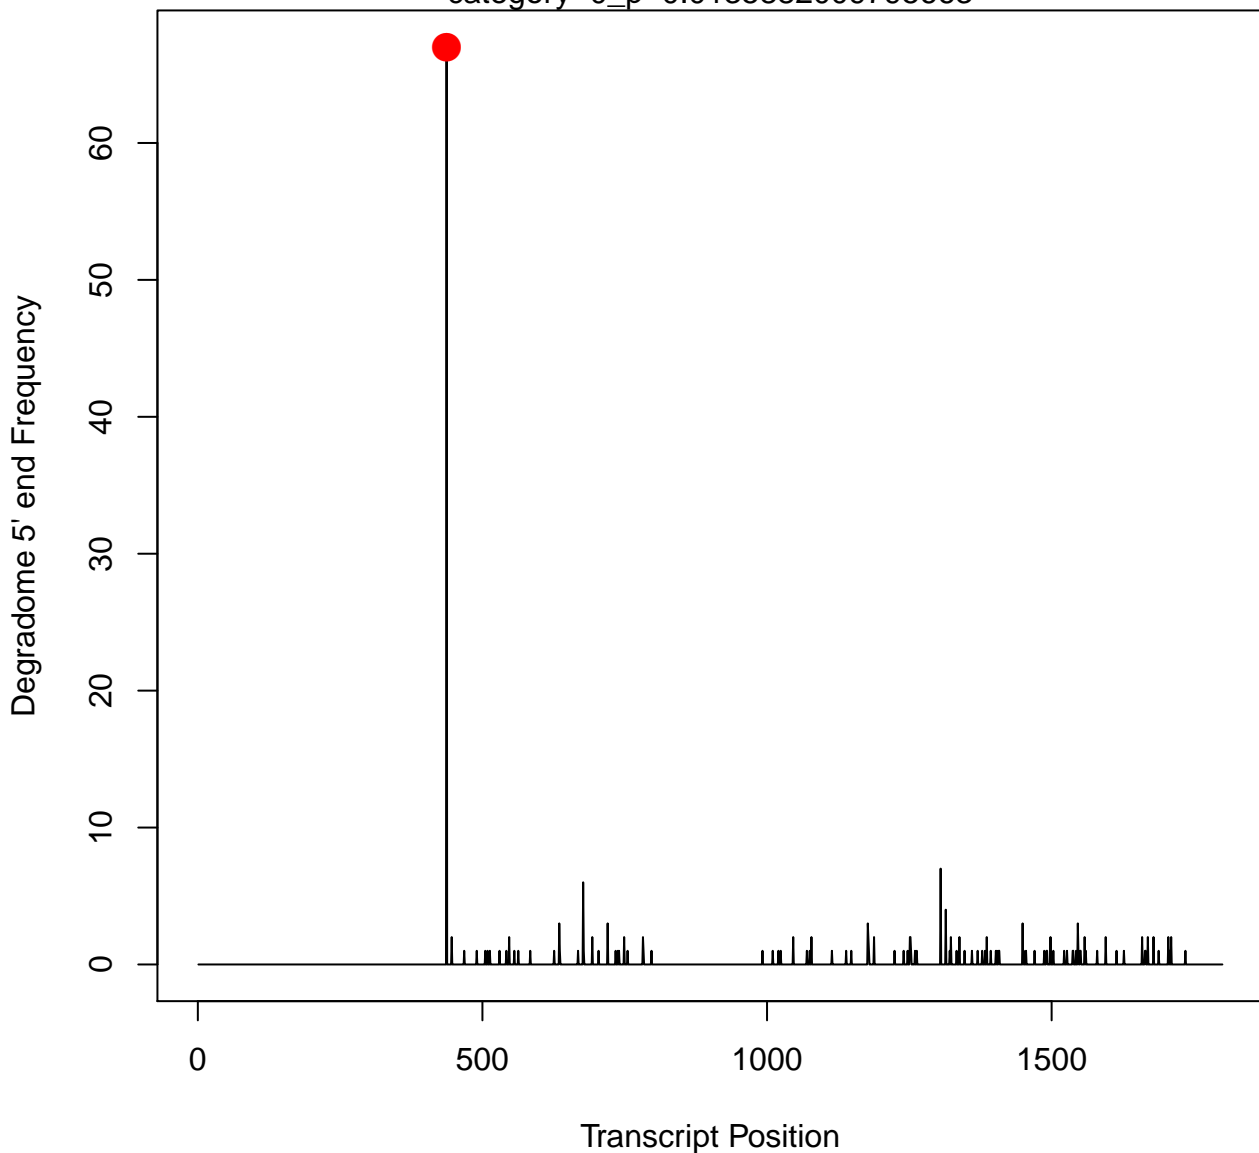

Supplement: s1 [file s1]

**T=Cluster-18410.56605\_Q=novel\_113\_S=924**

category=1\_p=0.00404722331852891

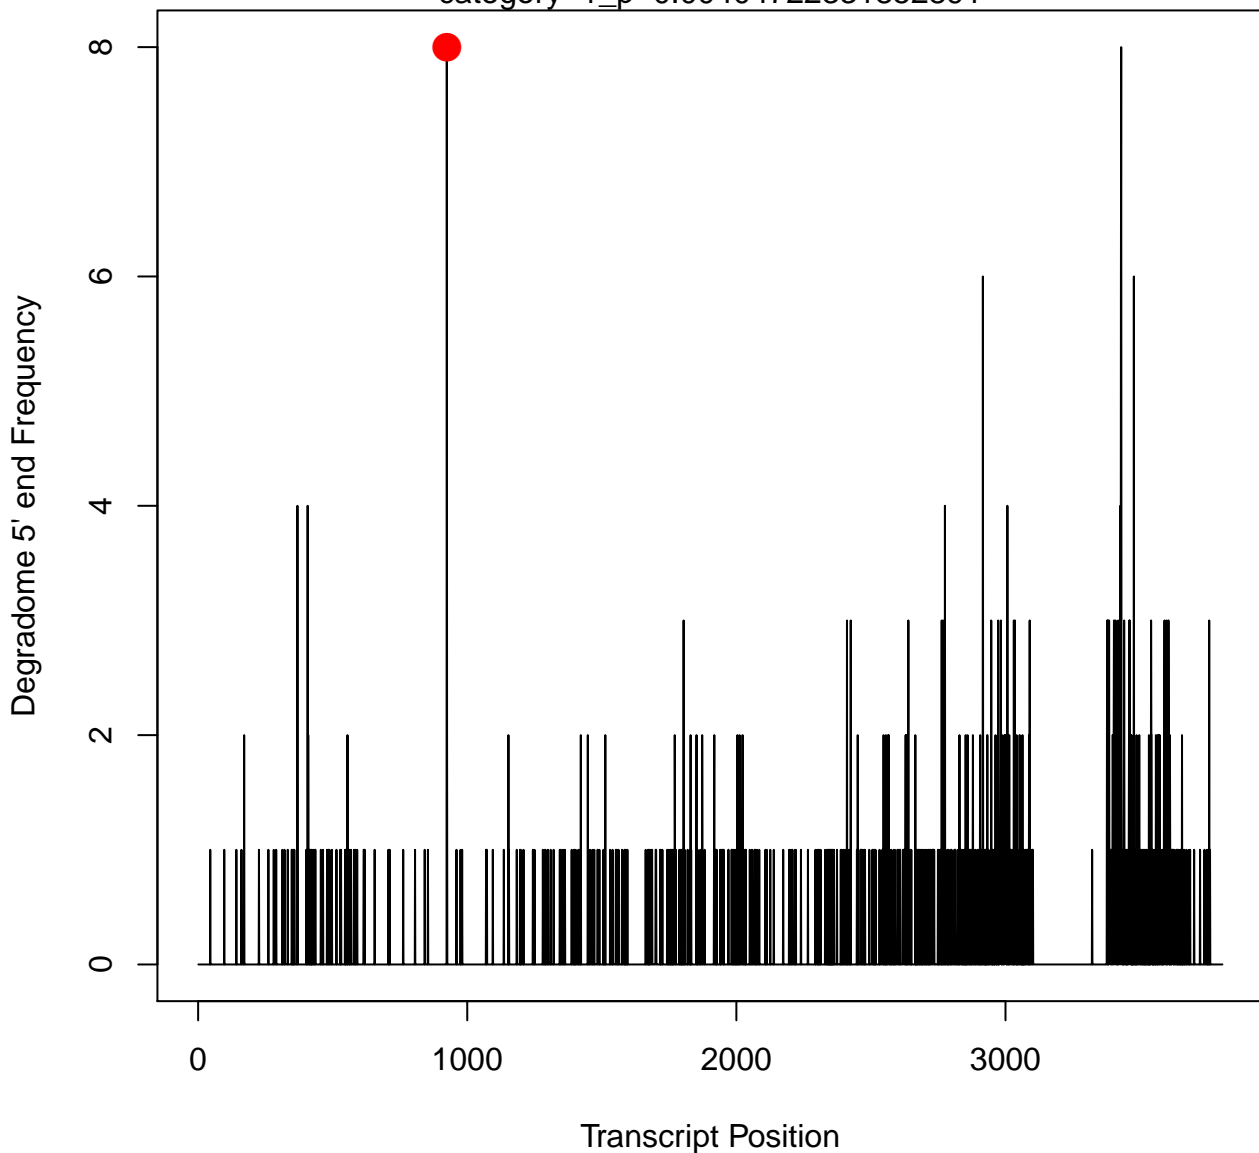

Supplement: s1 [file s1]

**T=Cluster-14331.0\_Q=novel\_20\_S=167**

category=0\_p=0.0103439671421557

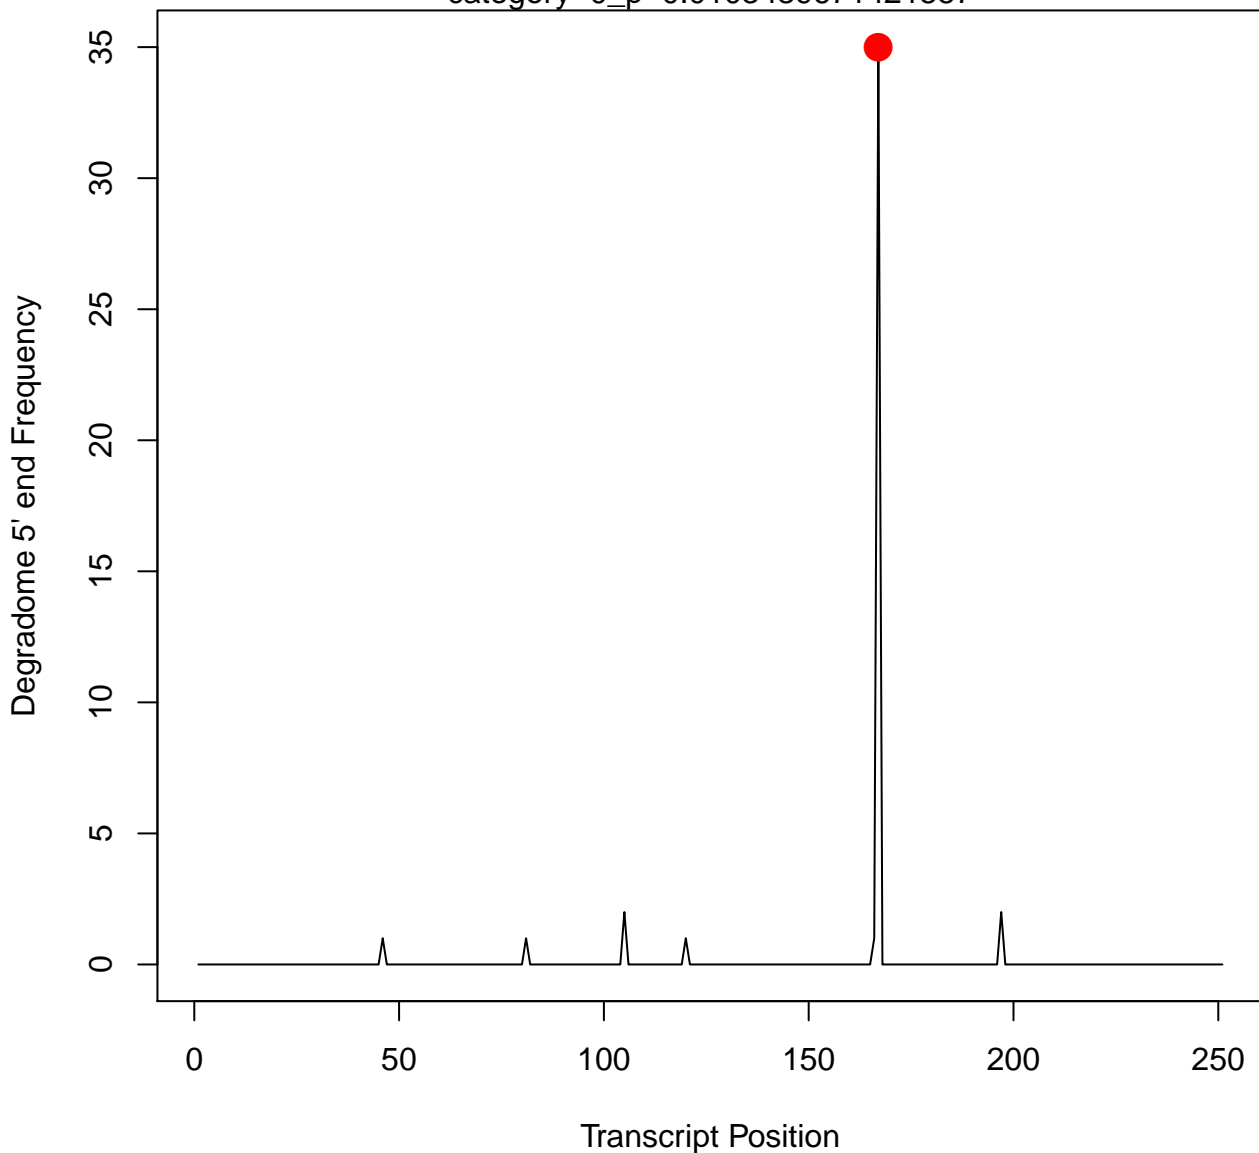

Supplement: s1 [file s1]

**T=Cluster-18410.110607\_Q=novel\_168\_S=1037**

category=0\_p=0.0304467552845014

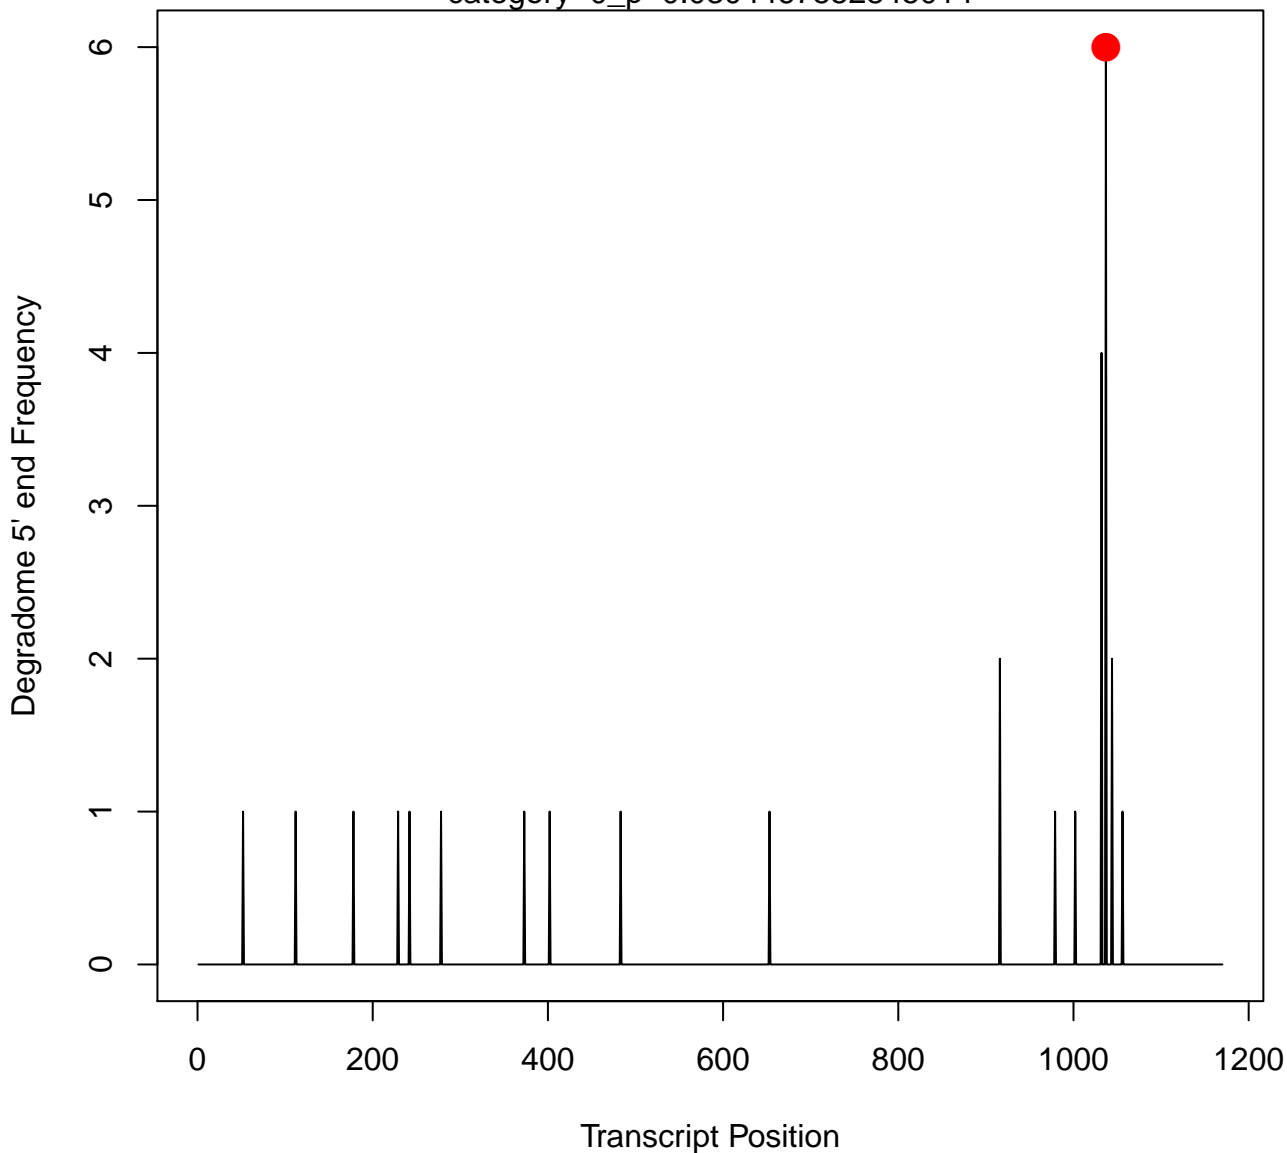

Supplement: s1 [file s1]

**T=Cluster-18410.77201\_Q=pma-miR482a\_S=50**

category=0\_p=0.00273253291772324

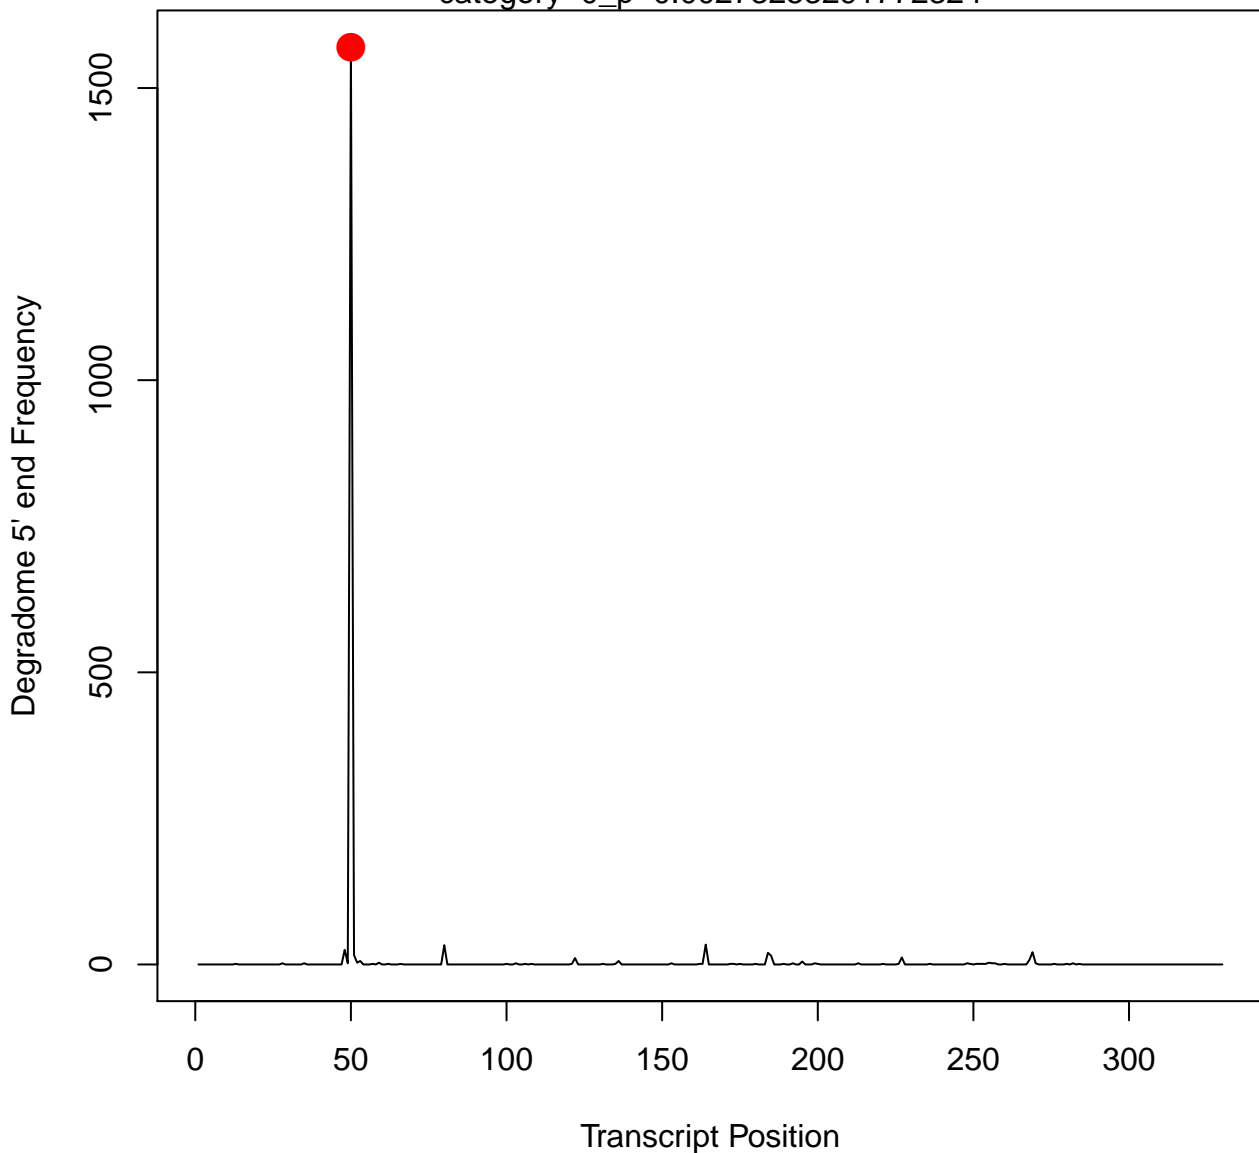

Supplement: s1 [file s1]

**T=Cluster-18410.89106\_Q=novel\_74\_S=624**

category=4\_p=0.0715786587755043

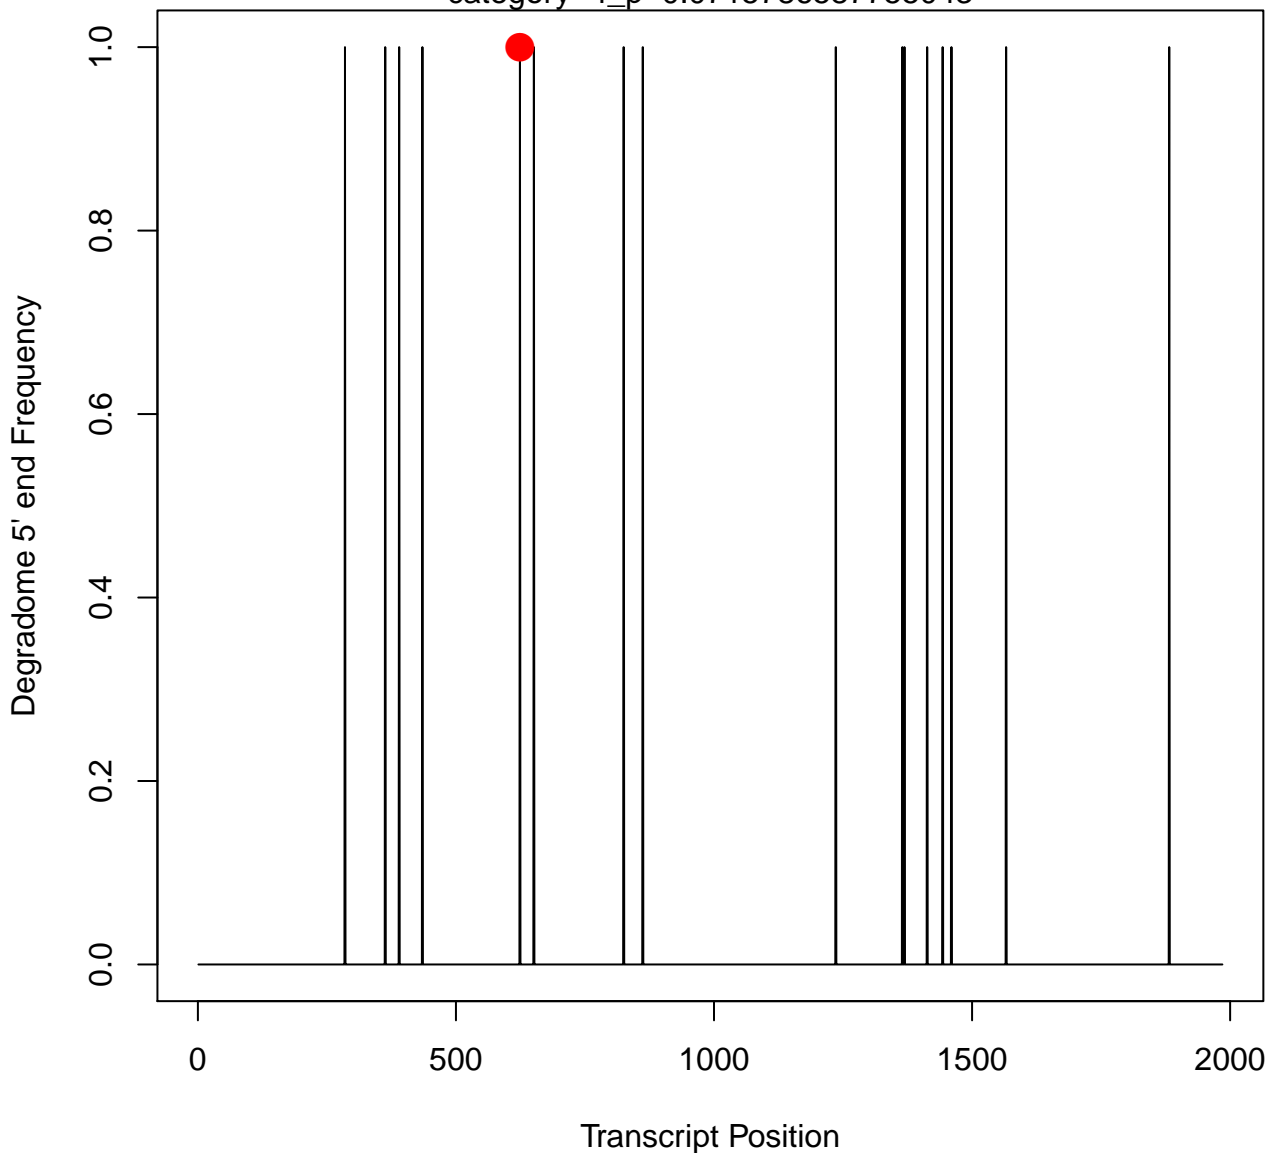

Supplement: s1 [file s1]

**T=Cluster-18410.20987\_Q=novel\_12\_S=618**

category=0\_p=0.00980222508390338

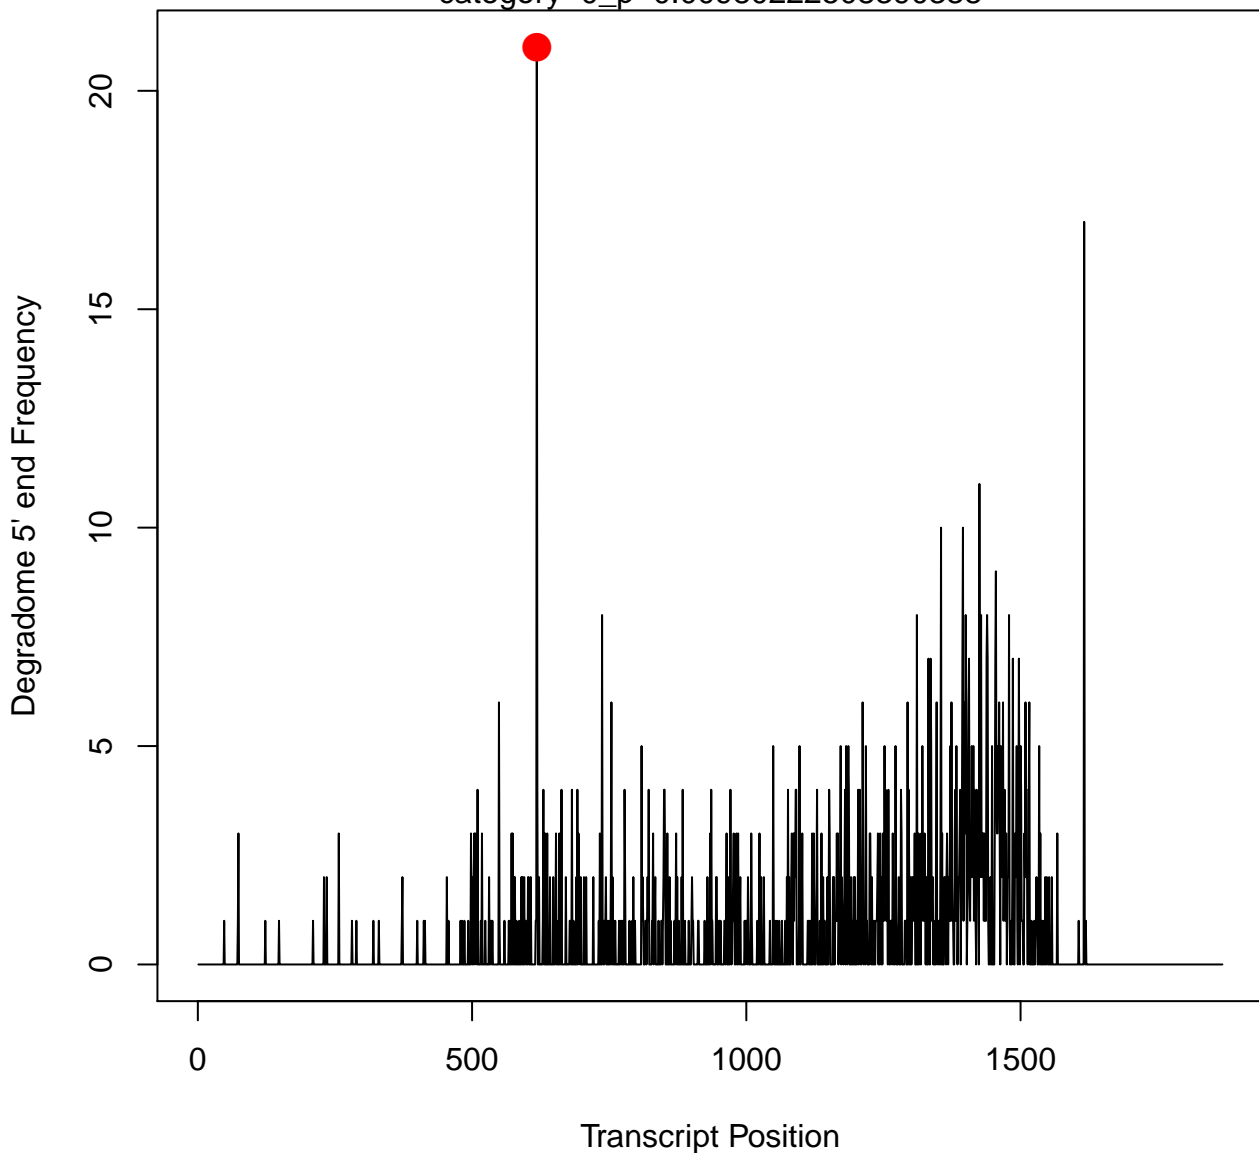

Supplement: s1 [file s1]

**T=Cluster-18410.66701\_Q=novel\_185\_S=2529**

category=2\_p=0.0673240995462872

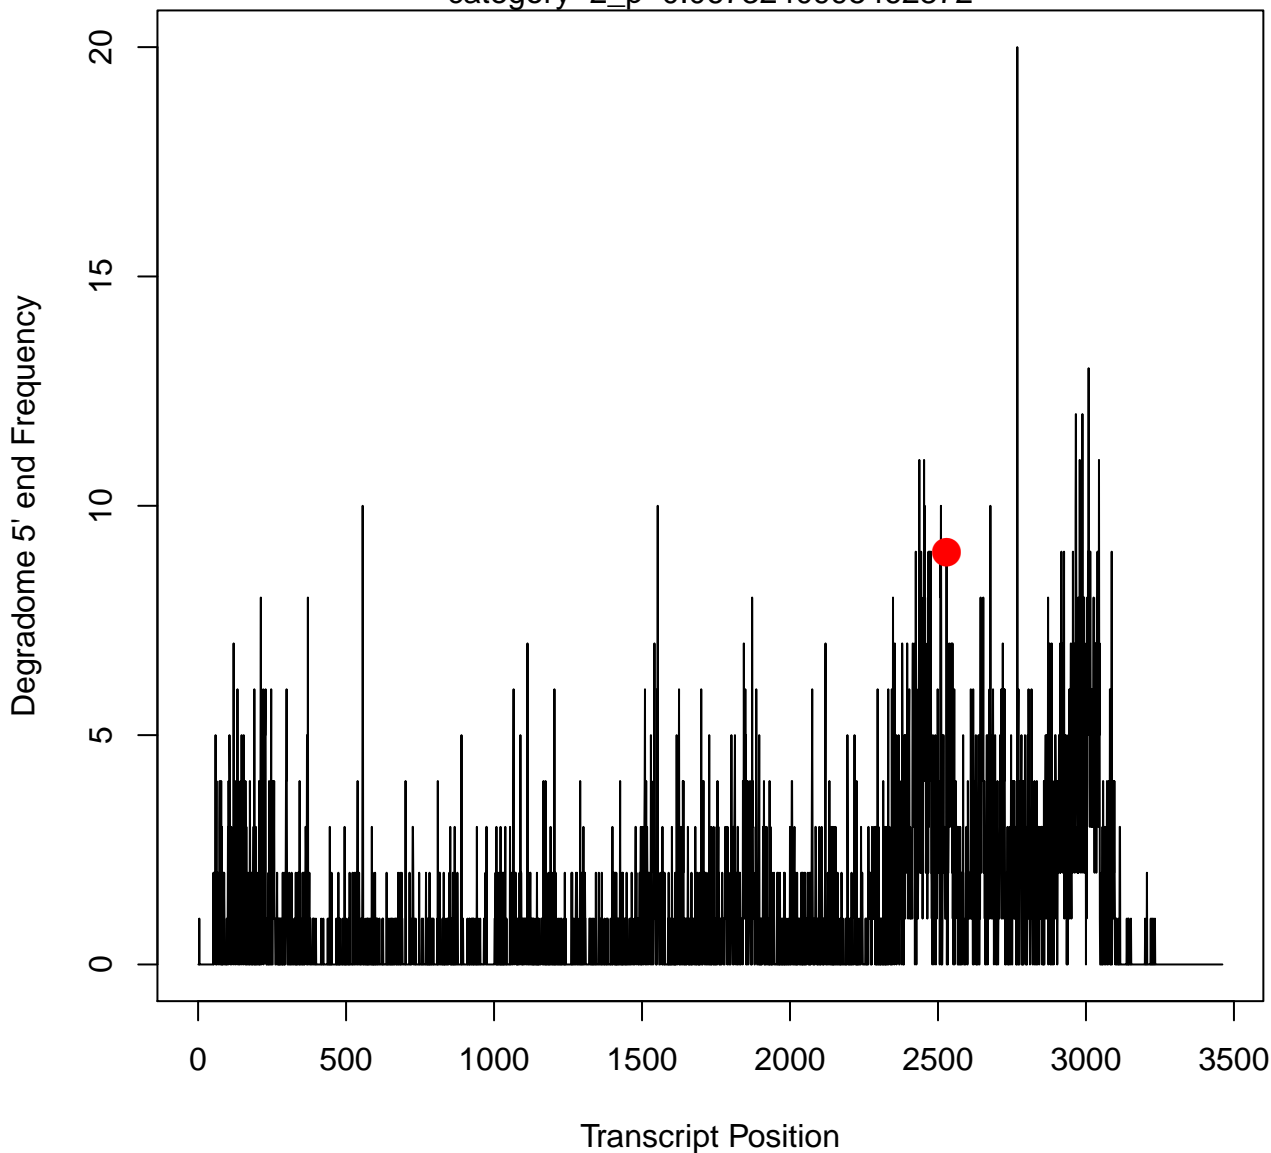

Supplement: s1 [file s1]

**T=Cluster-18410.112332\_Q=novel\_168\_S=17**

category=0\_p=0.0381099019474973

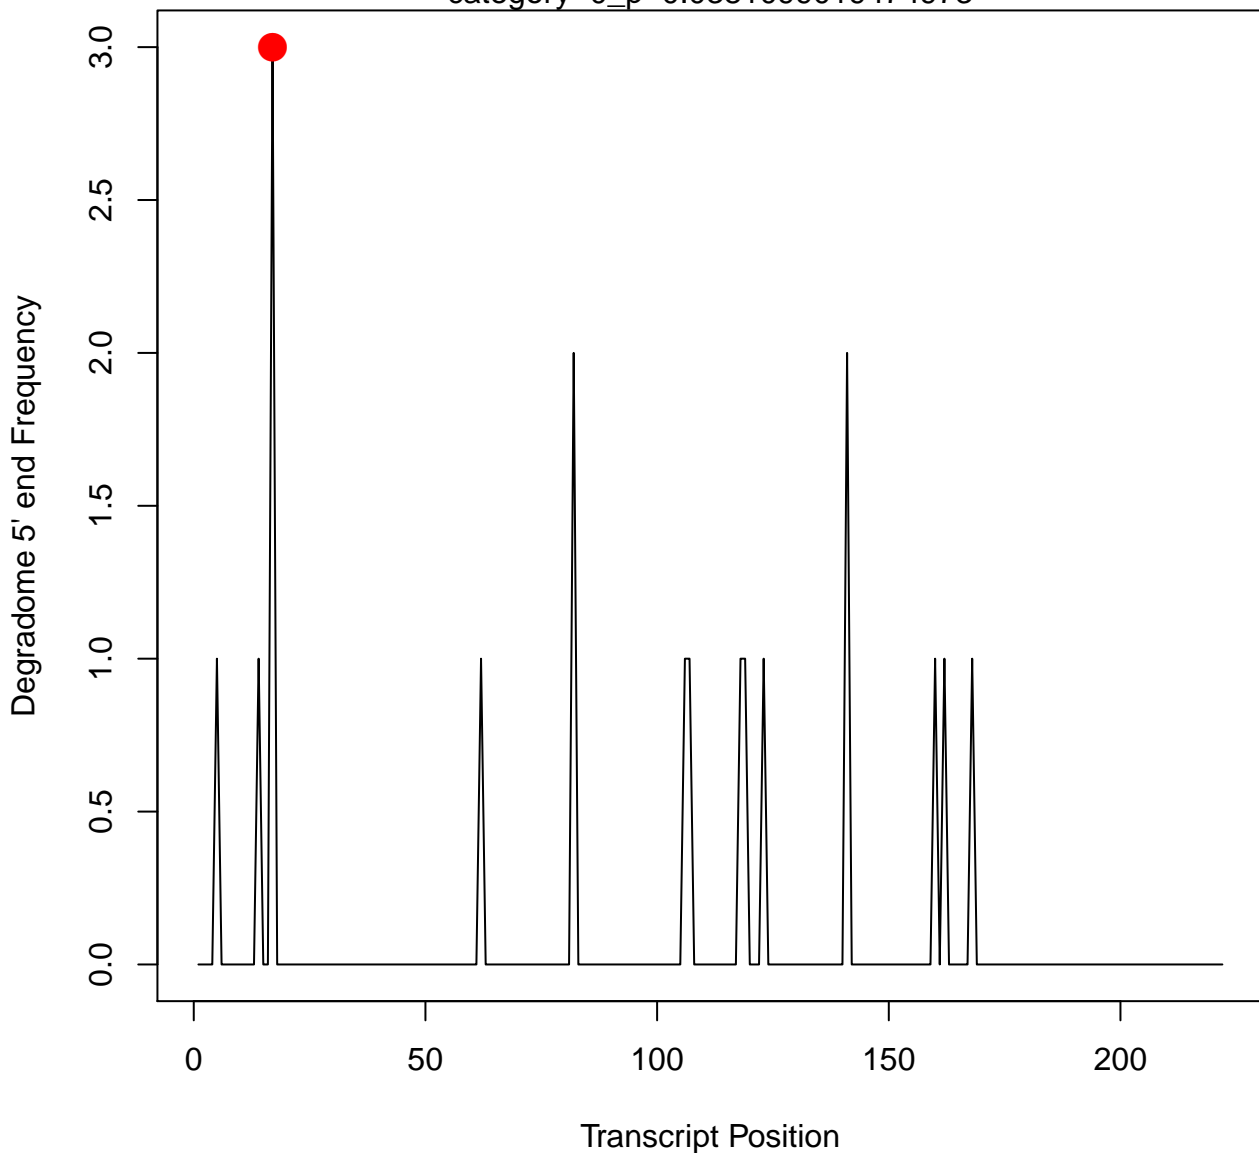

Supplement: s1 [file s1]

**T=Cluster-18410.22504\_Q=pma-miR951\_S=271**

category=0\_p=0.0216523334092837

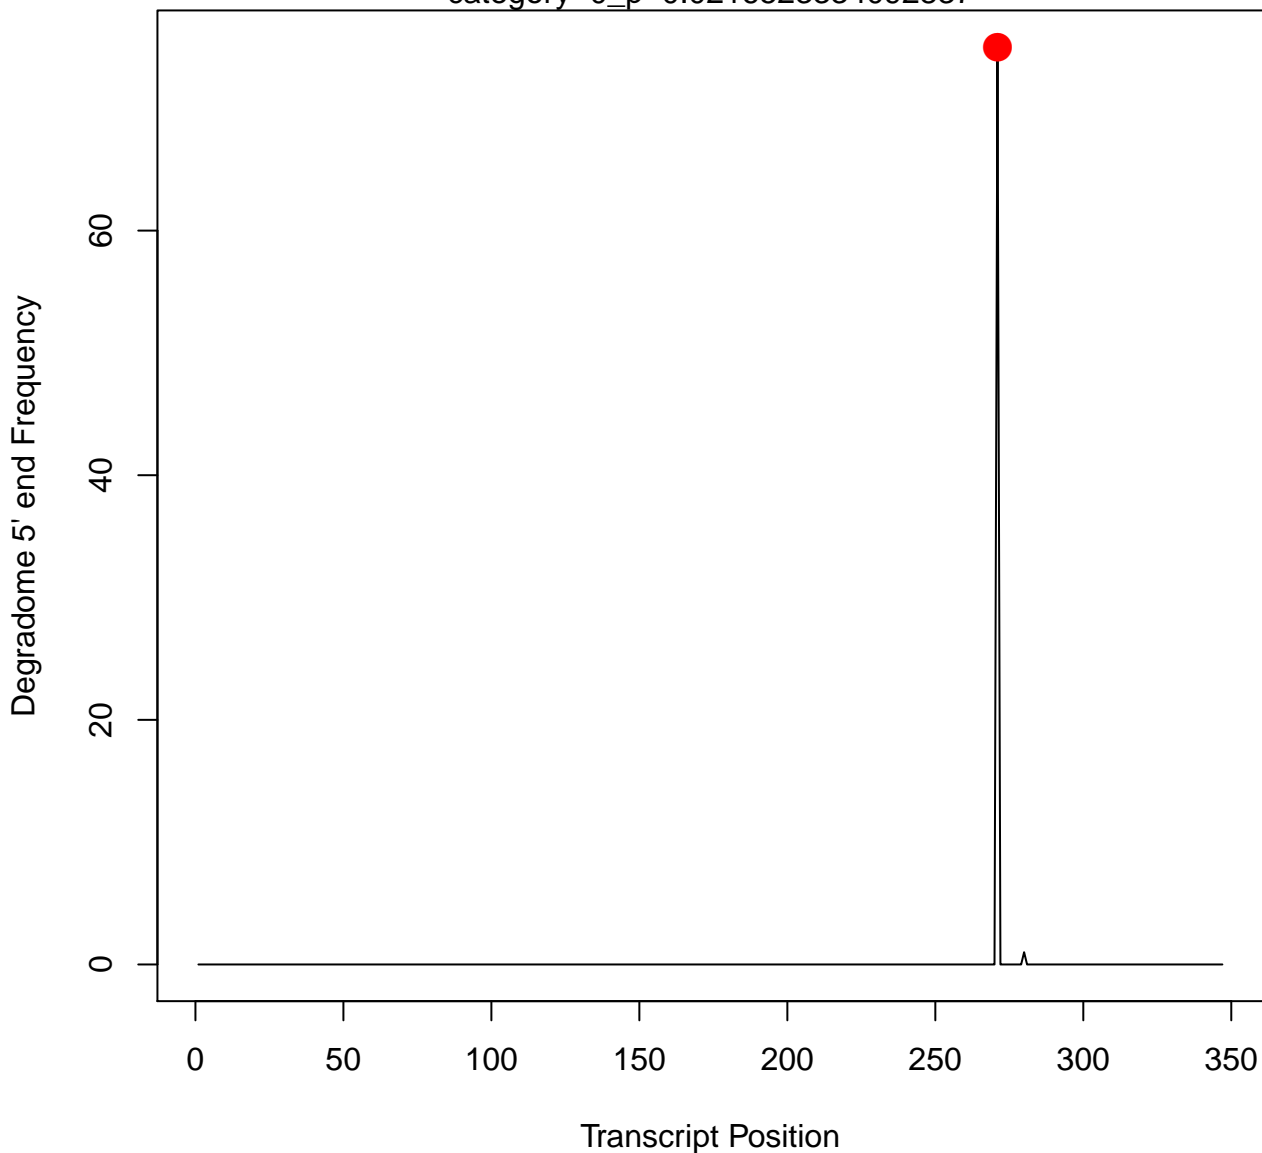

Supplement: s1 [file s1]

**T=Cluster-18410.27941\_Q=novel\_27\_S=299**

category=3\_p=0.0424939132250566

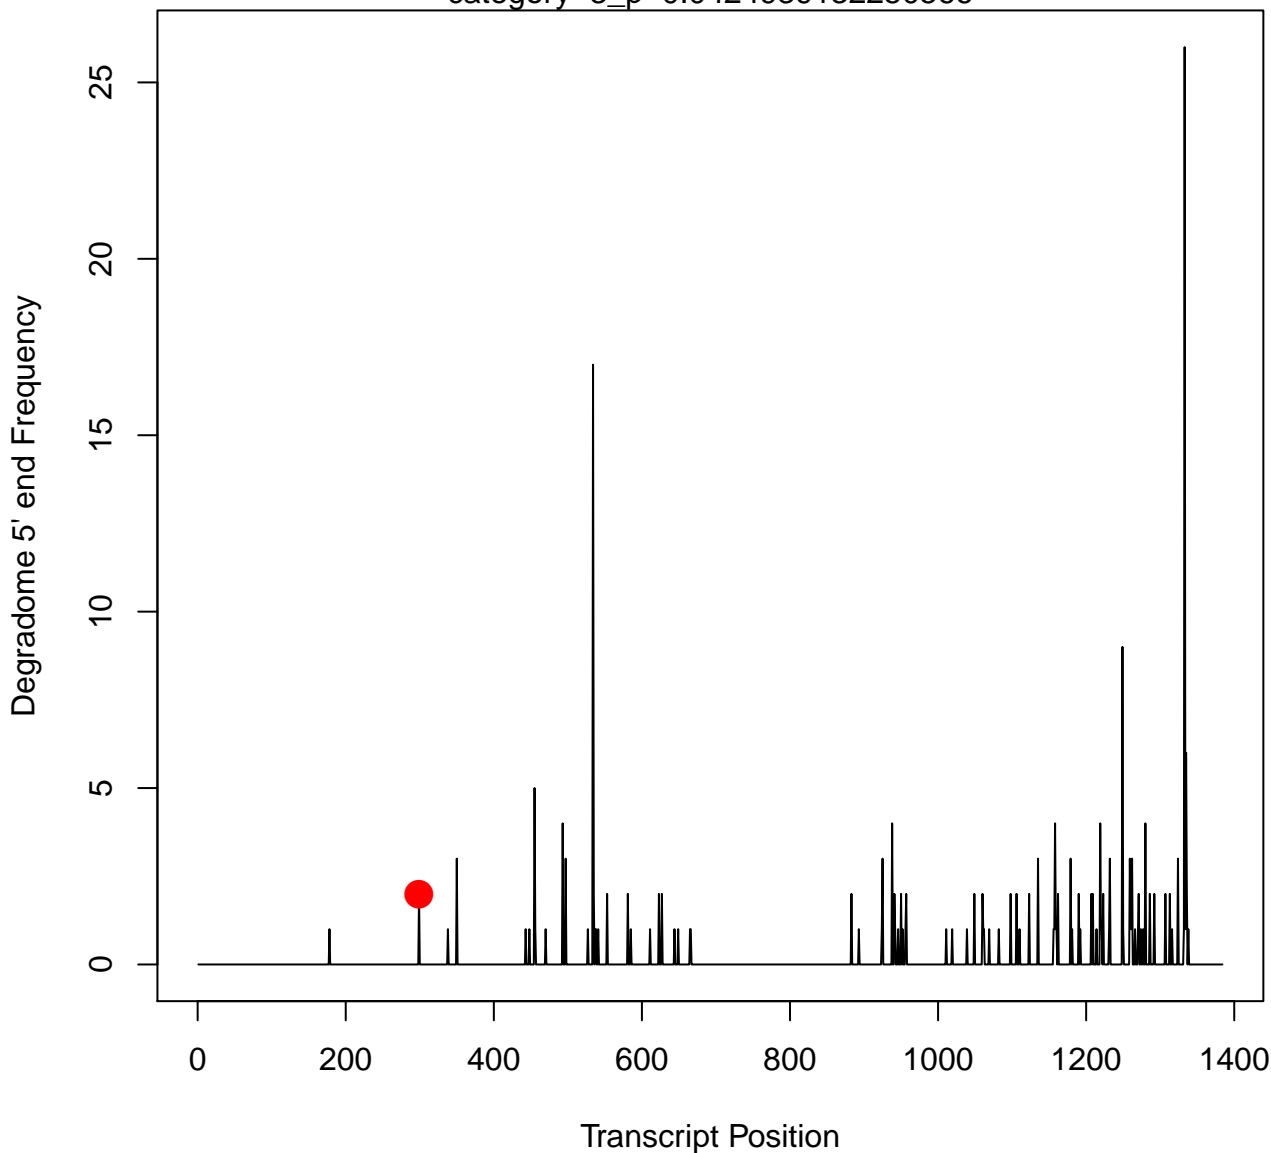

Supplement: s1 [file s1]

**T=Cluster-18410.65489\_Q=novel\_195\_S=4152**

category=0\_p=0.00027358987754178

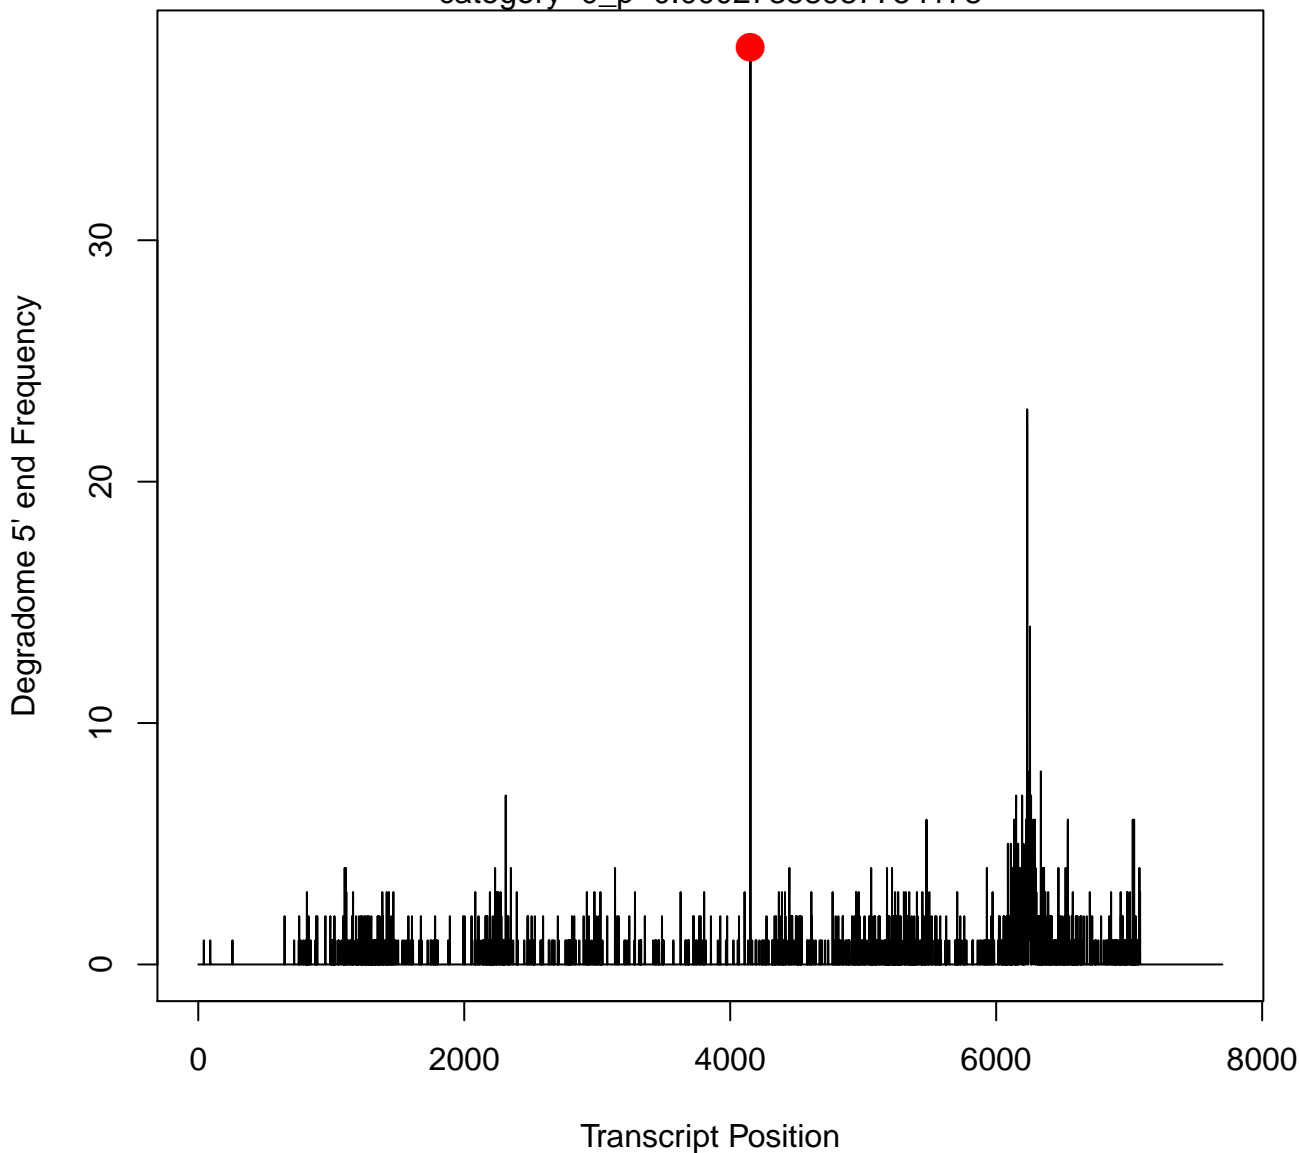

Supplement: s1 [file s1]

**T=Cluster-18410.51836\_Q=novel\_158\_S=578**

category=4\_p=0.0715786587755043

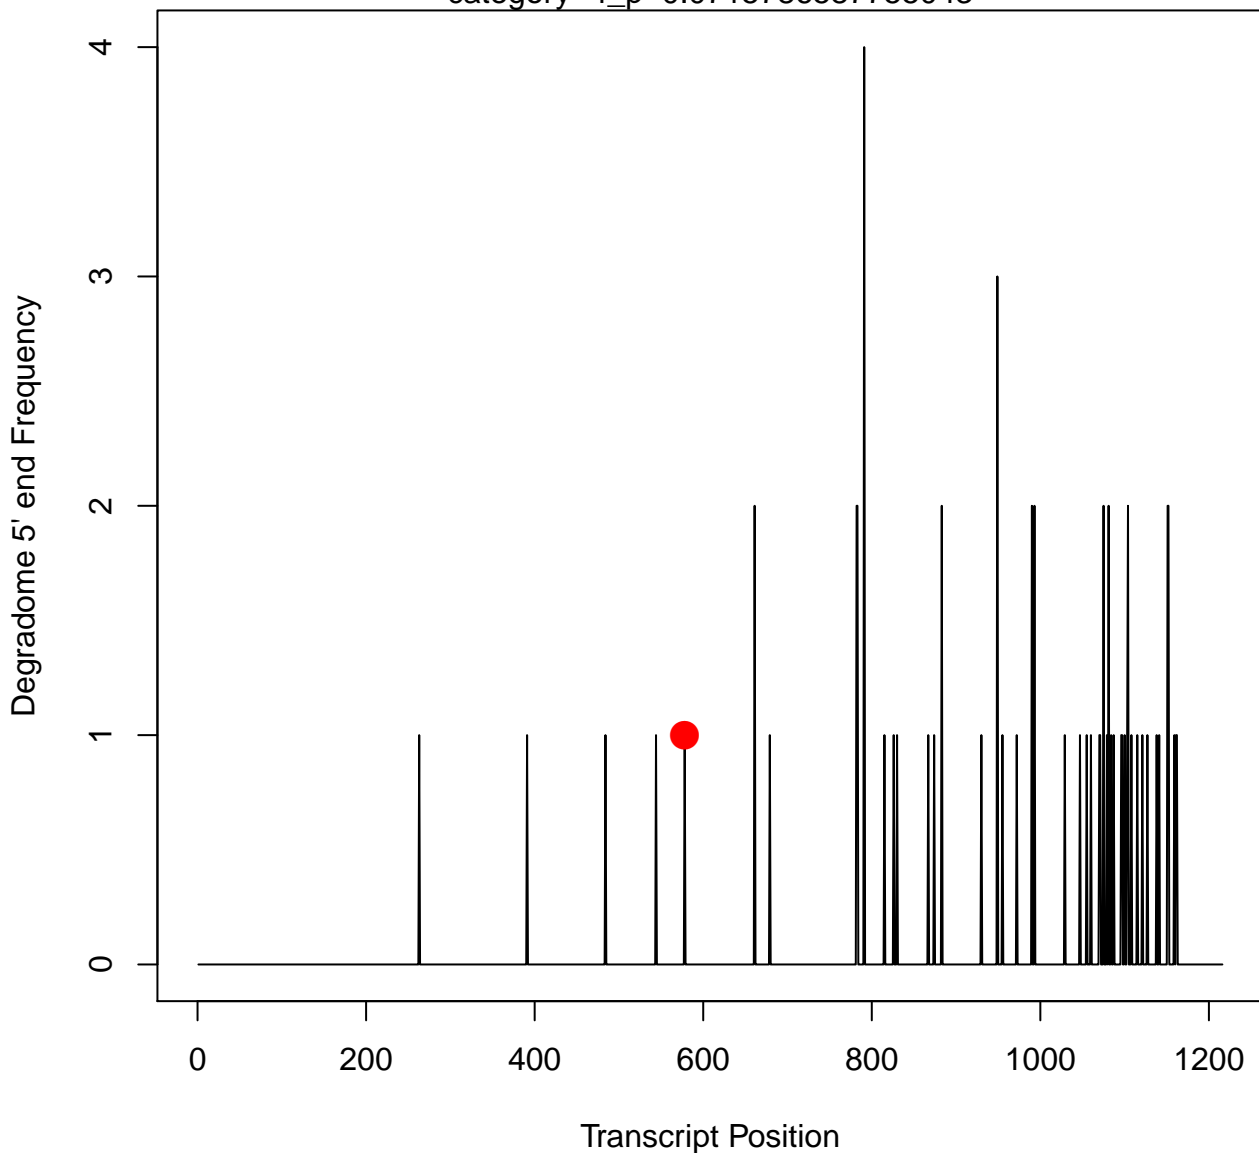

Supplement: s1 [file s1]

**T=Cluster-18410.32752\_Q=novel\_20\_S=1852**

category=0\_p=0.00708906326490744

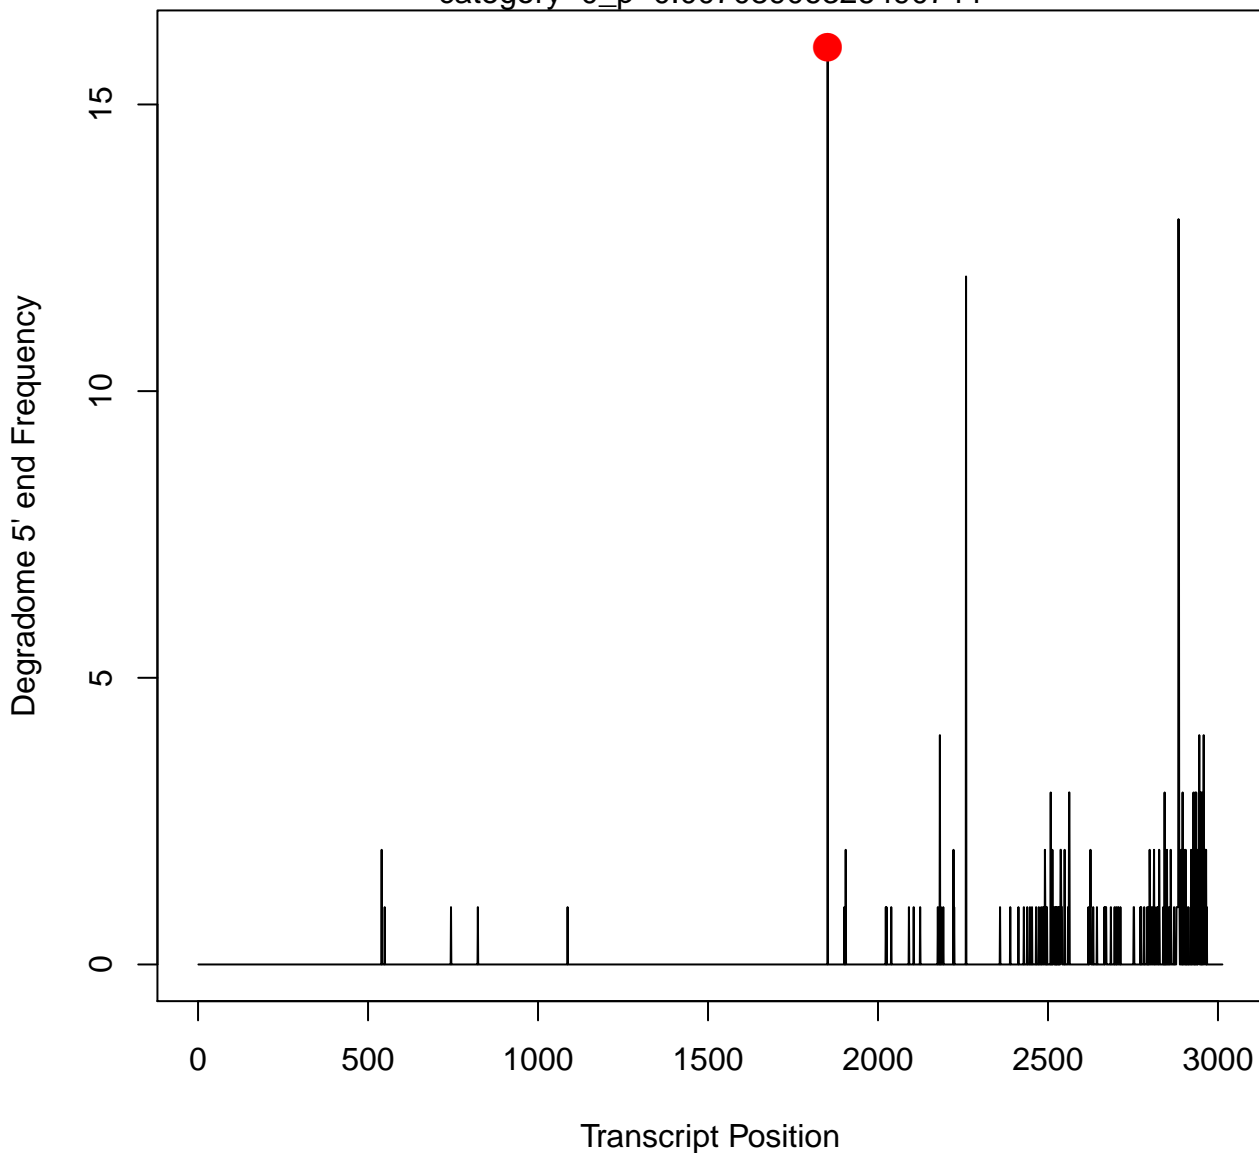

Supplement: s1 [file s1]

**T=Cluster-18410.18473\_Q=novel\_47\_S=56**

category=0\_p=0.00218662432695249

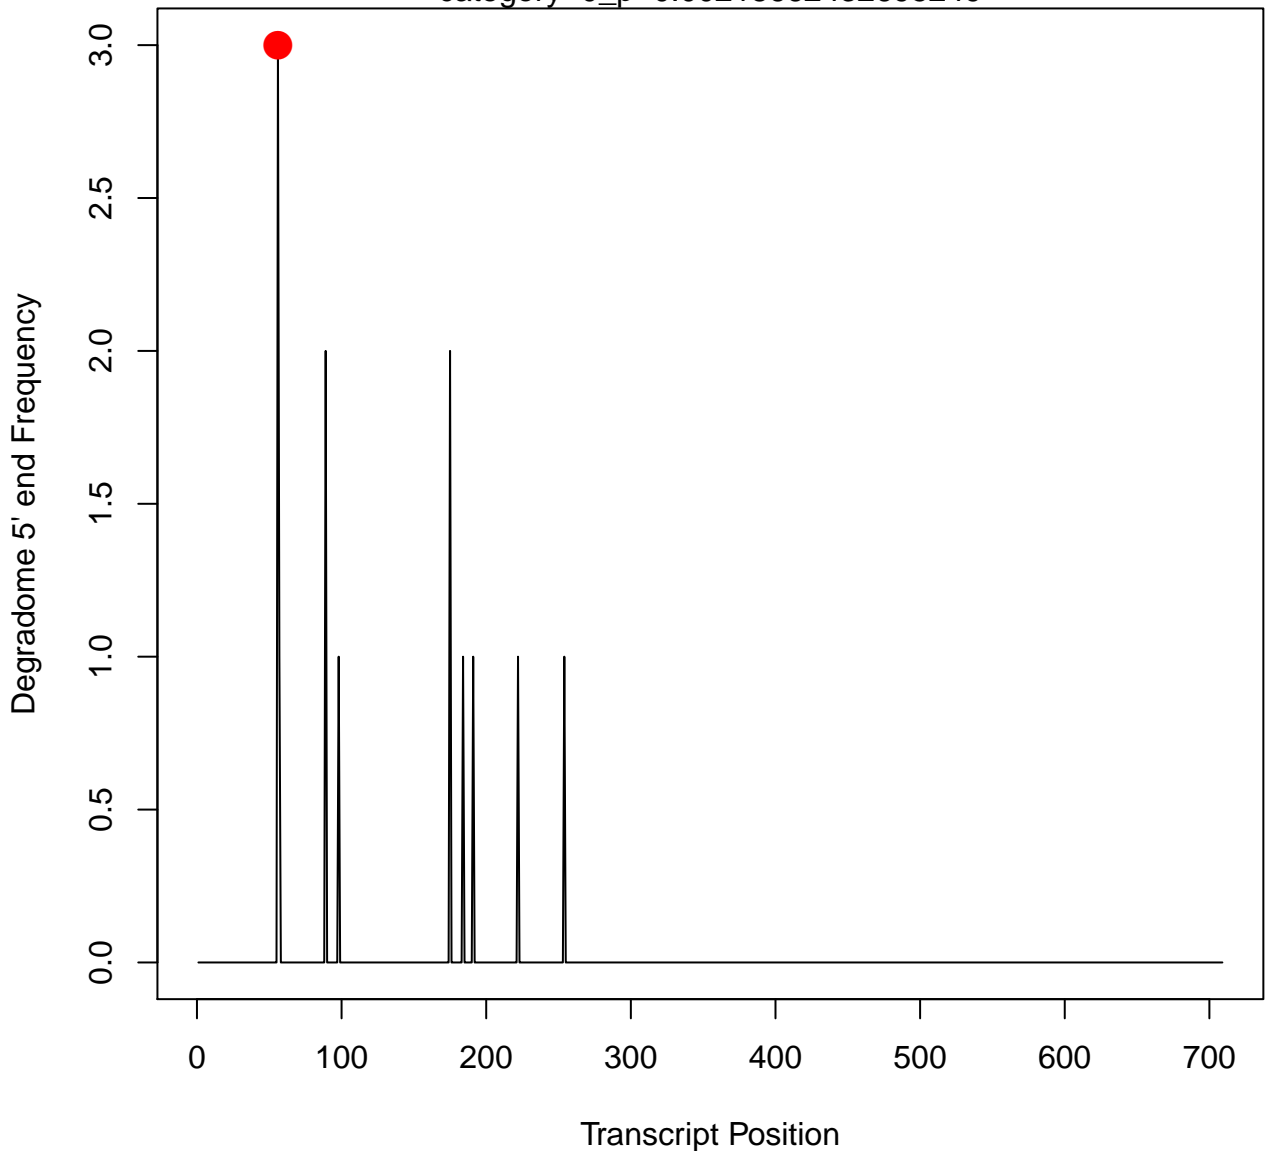

Supplement: s1 [file s1]

**T=Cluster-18410.36471\_Q=novel\_151\_S=476**

category=4\_p=0.0483072886549676

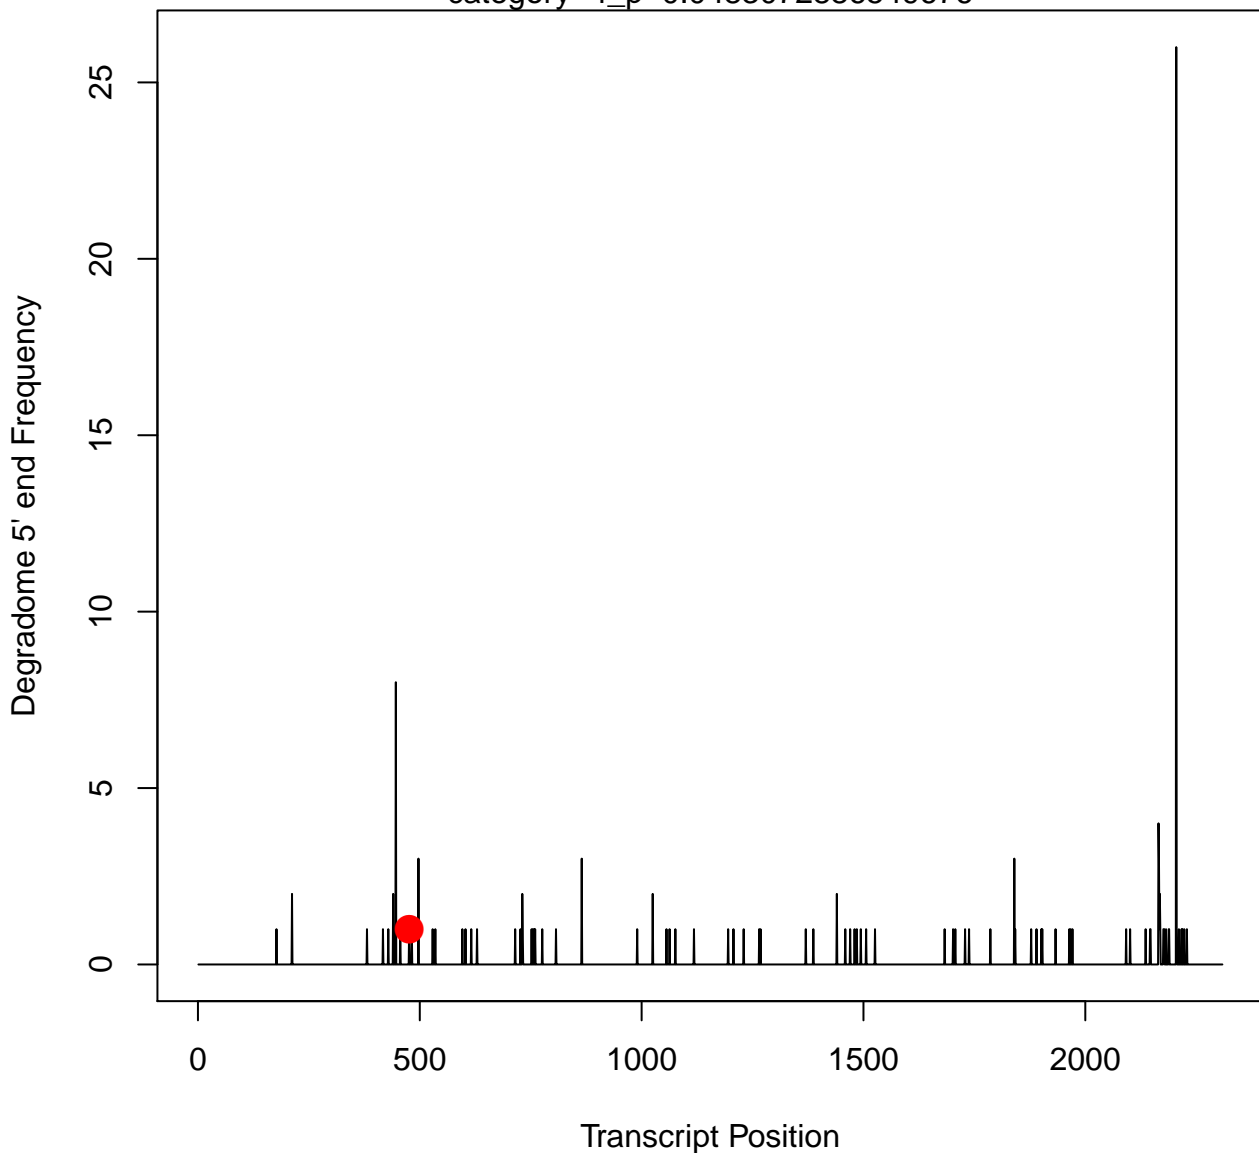

Supplement: s1 [file s1]

**T=Cluster-18410.70653\_Q=novel\_8\_S=586**

category=3\_p=0.0214776002691899

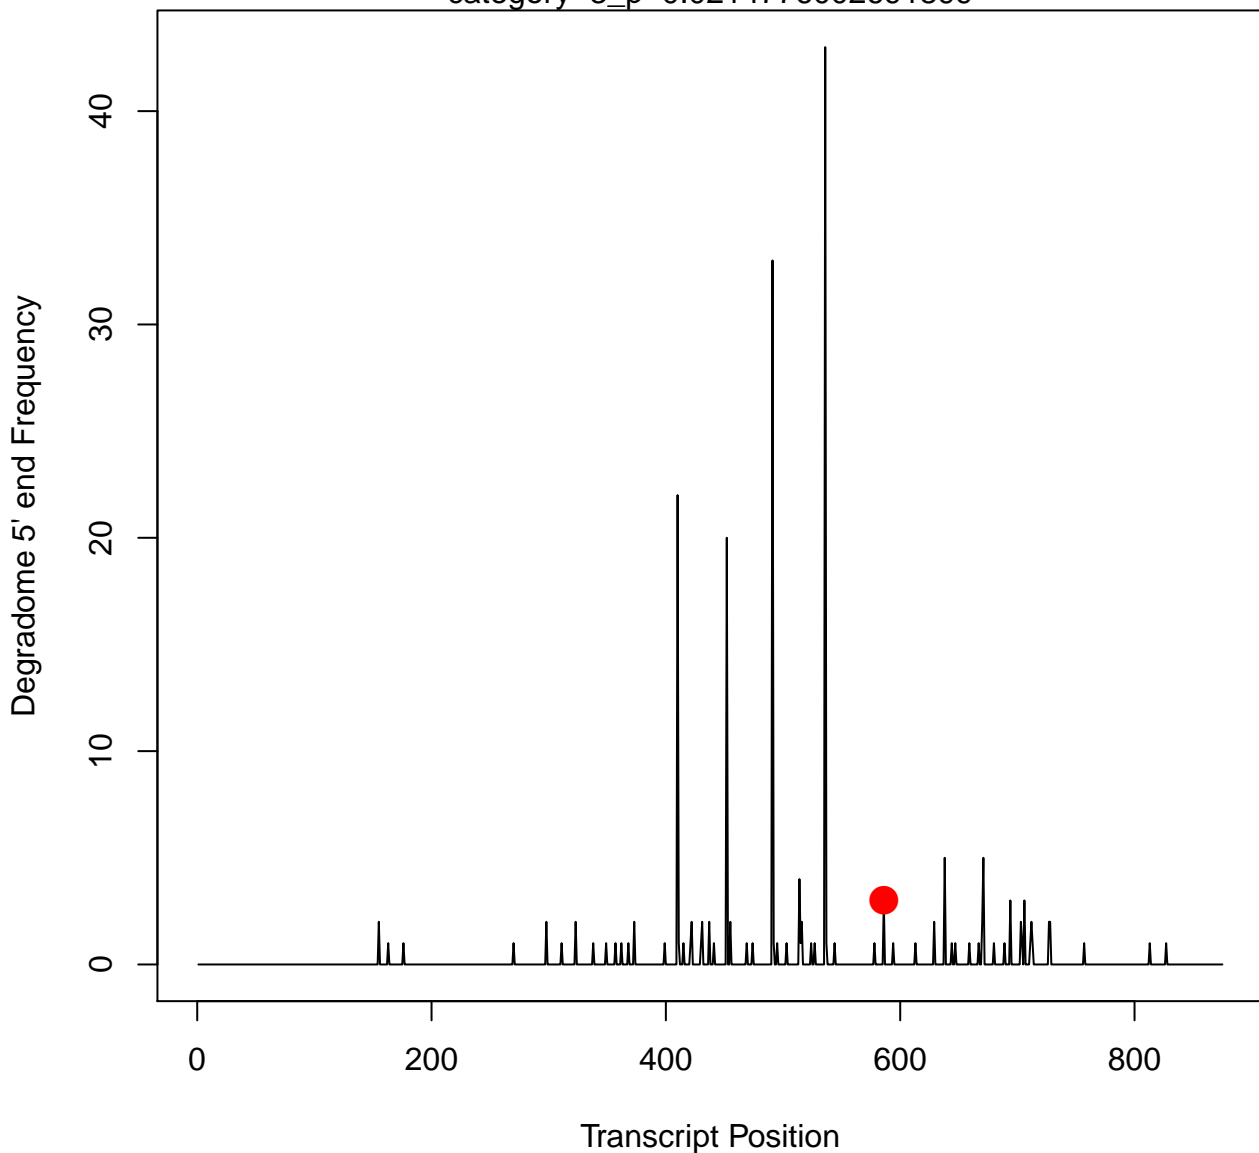

Supplement: s1 [file s1]

**T=Cluster-18410.58759\_Q=novel\_167\_S=537**

category=4\_p=0.0483072886549676

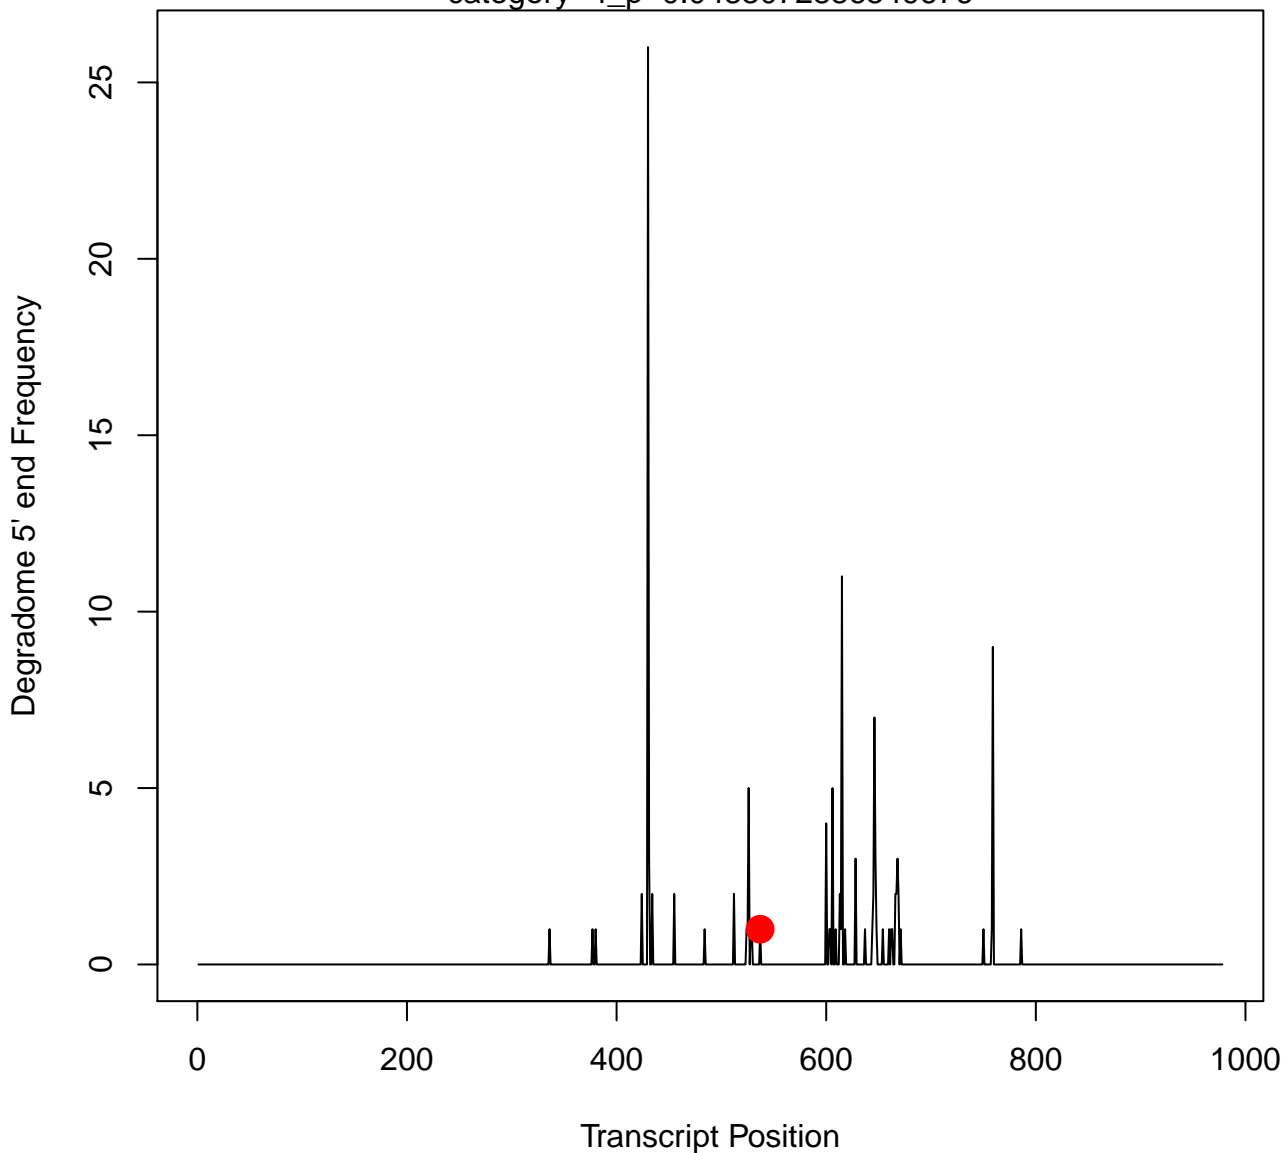

Supplement: s1 [file s1]

**T=Cluster-18410.108253\_Q=novel\_65\_S=311**

category=0\_p=0.00109391048354923

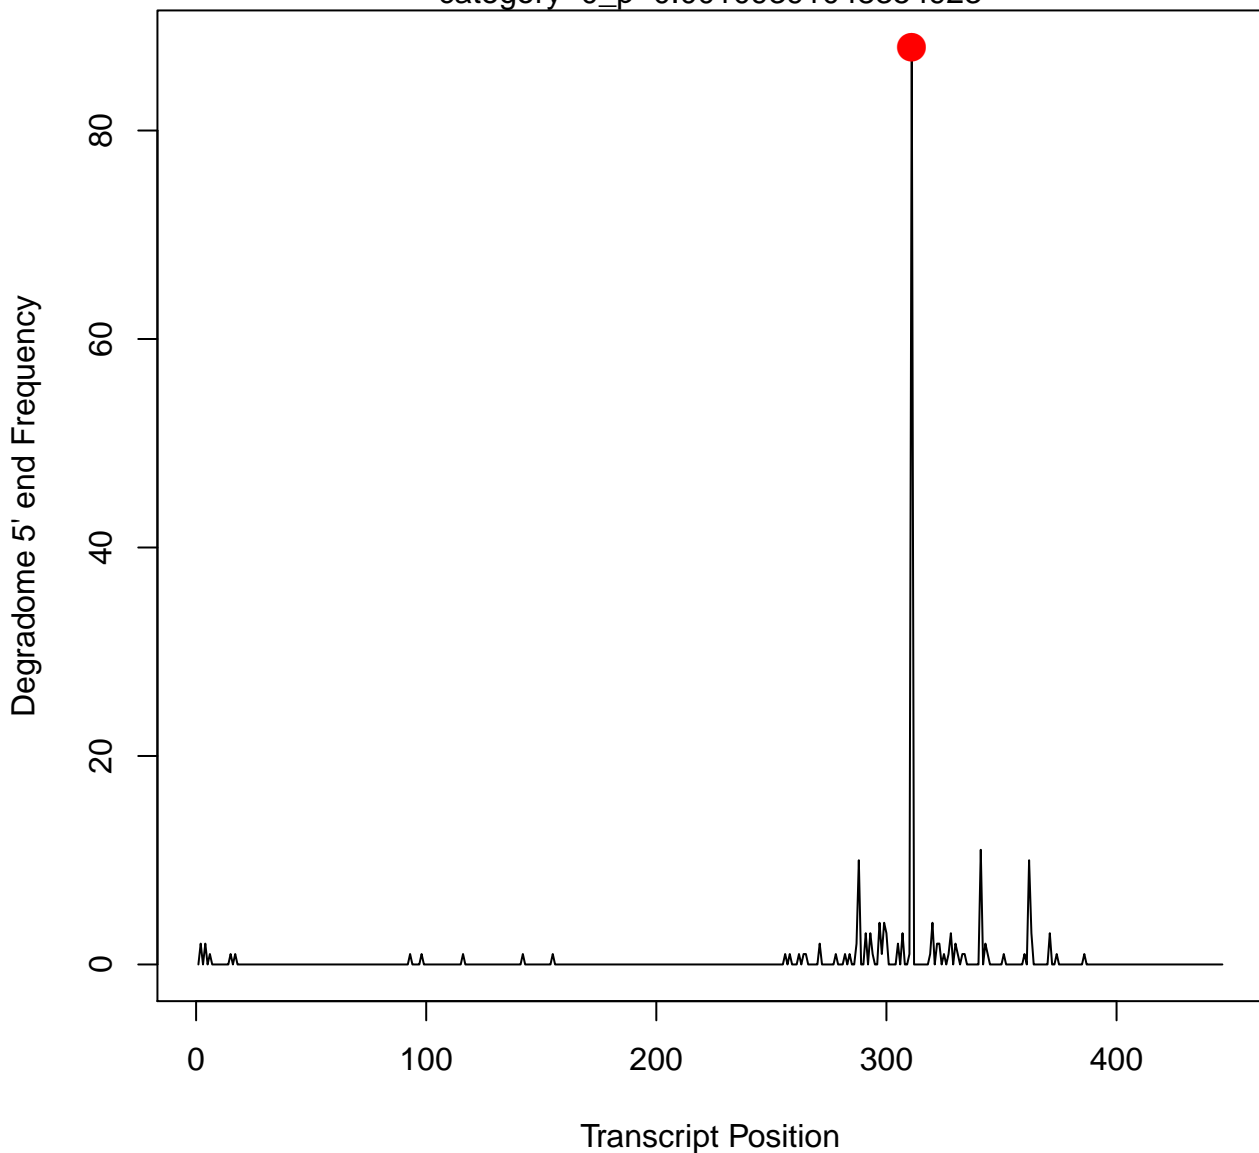

Supplement: s1 [file s1]

**T=Cluster-18410.13639\_Q=novel\_20\_S=1467**

category=0\_p=0.0219199994275796

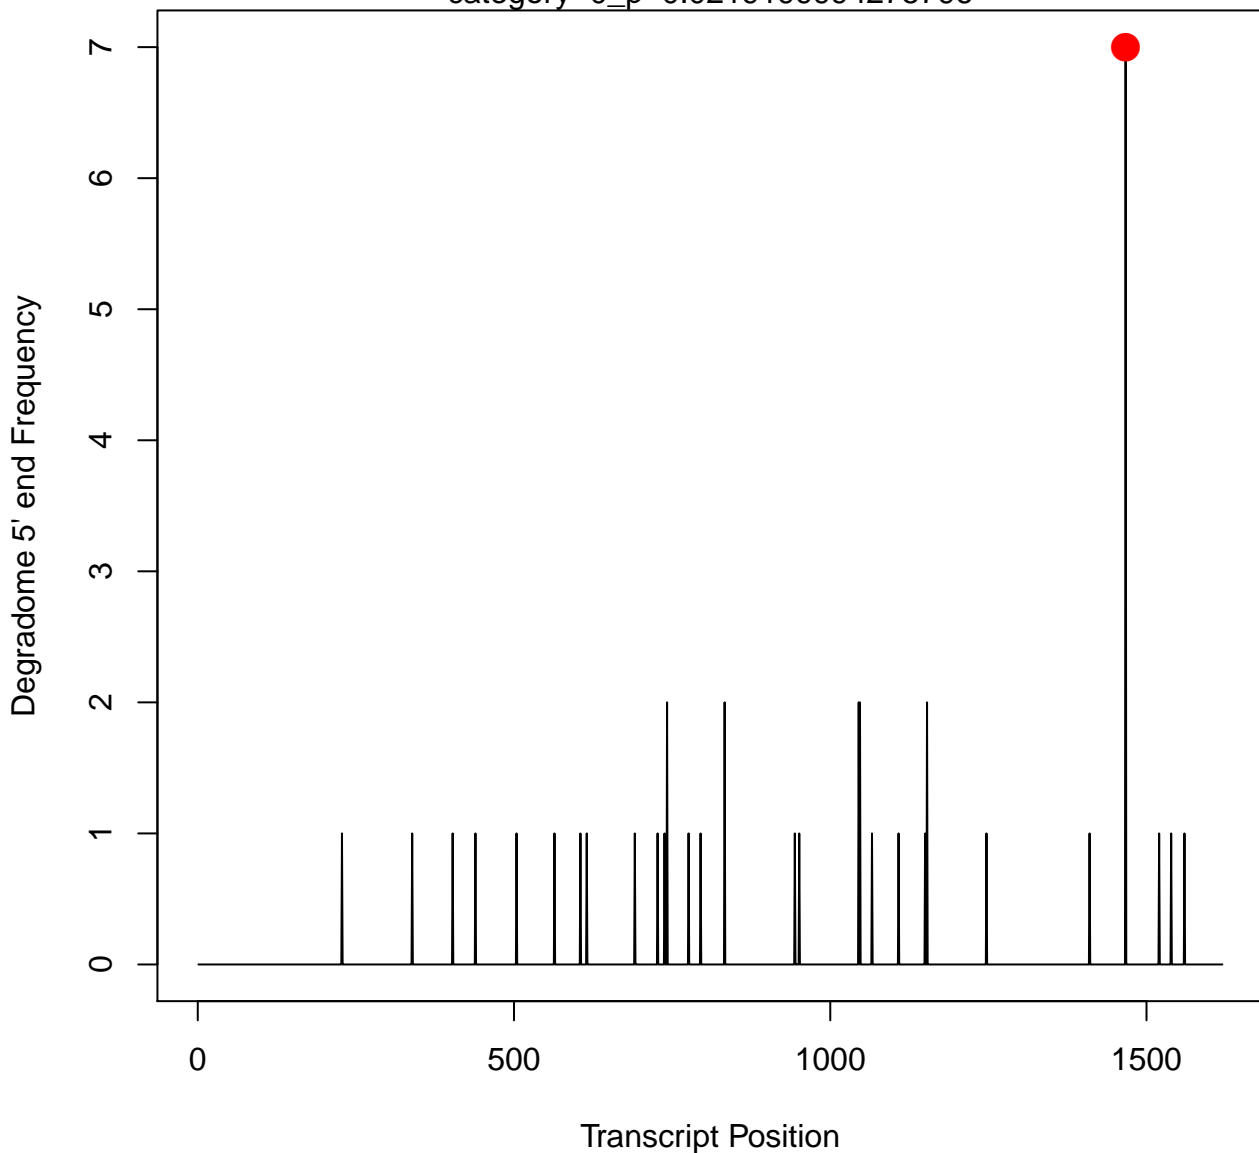

Supplement: s1 [file s1]

**T=Cluster-18410.107071\_Q=novel\_9\_S=291**

category=1\_p=0.0433310133553935

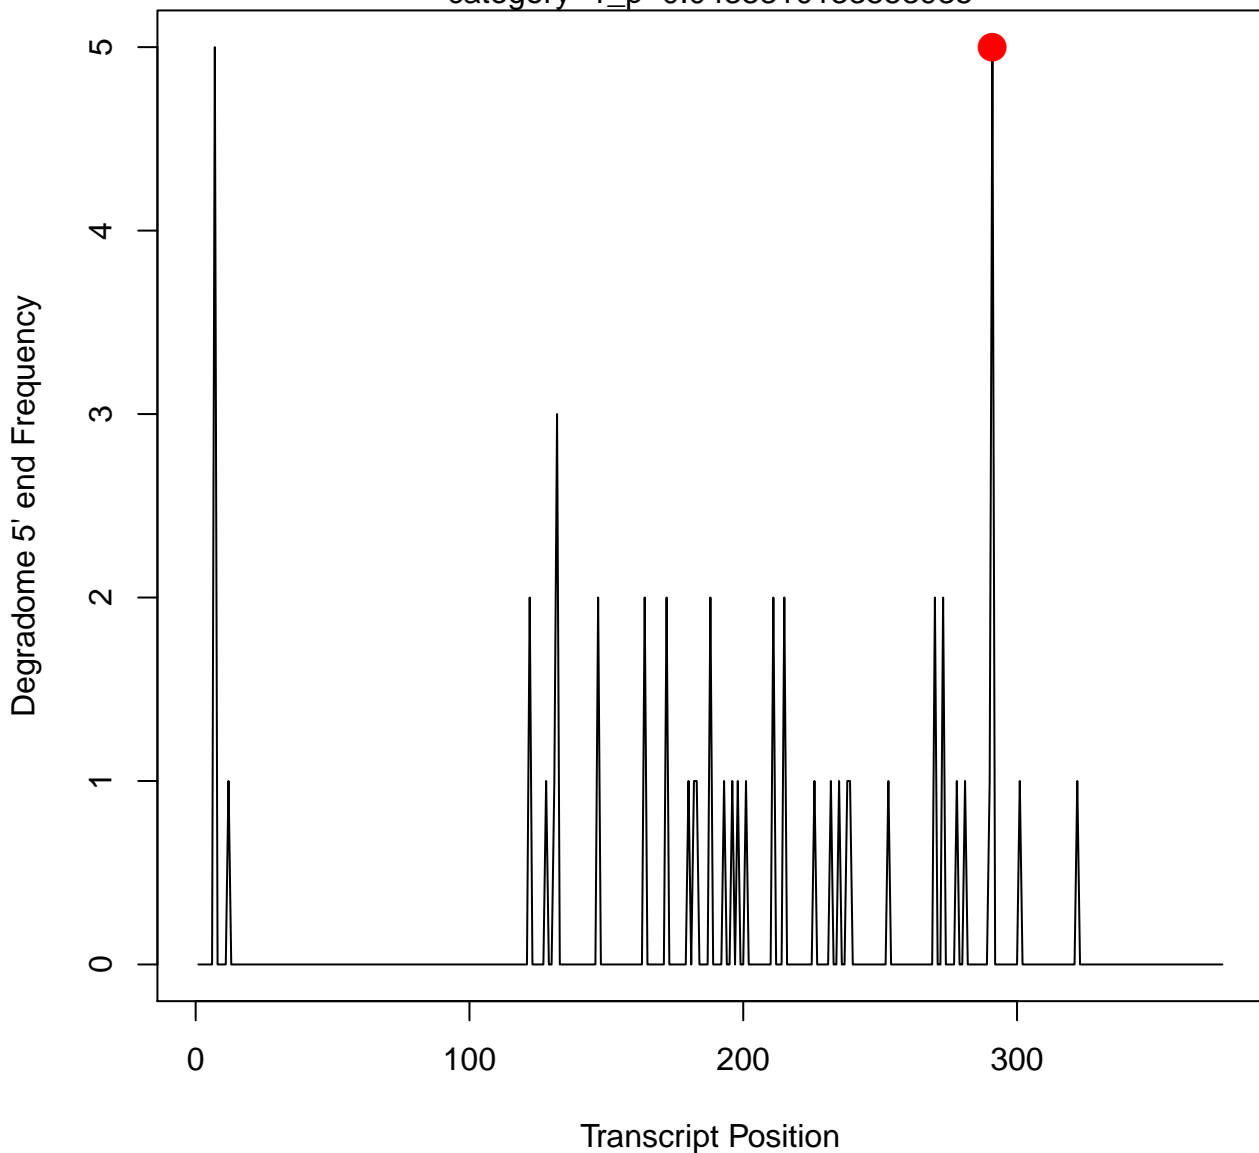

Supplement: s1 [file s1]

**T=Cluster-18410.8260\_Q=novel\_168\_S=672**

category=0\_p=0.018434621893812

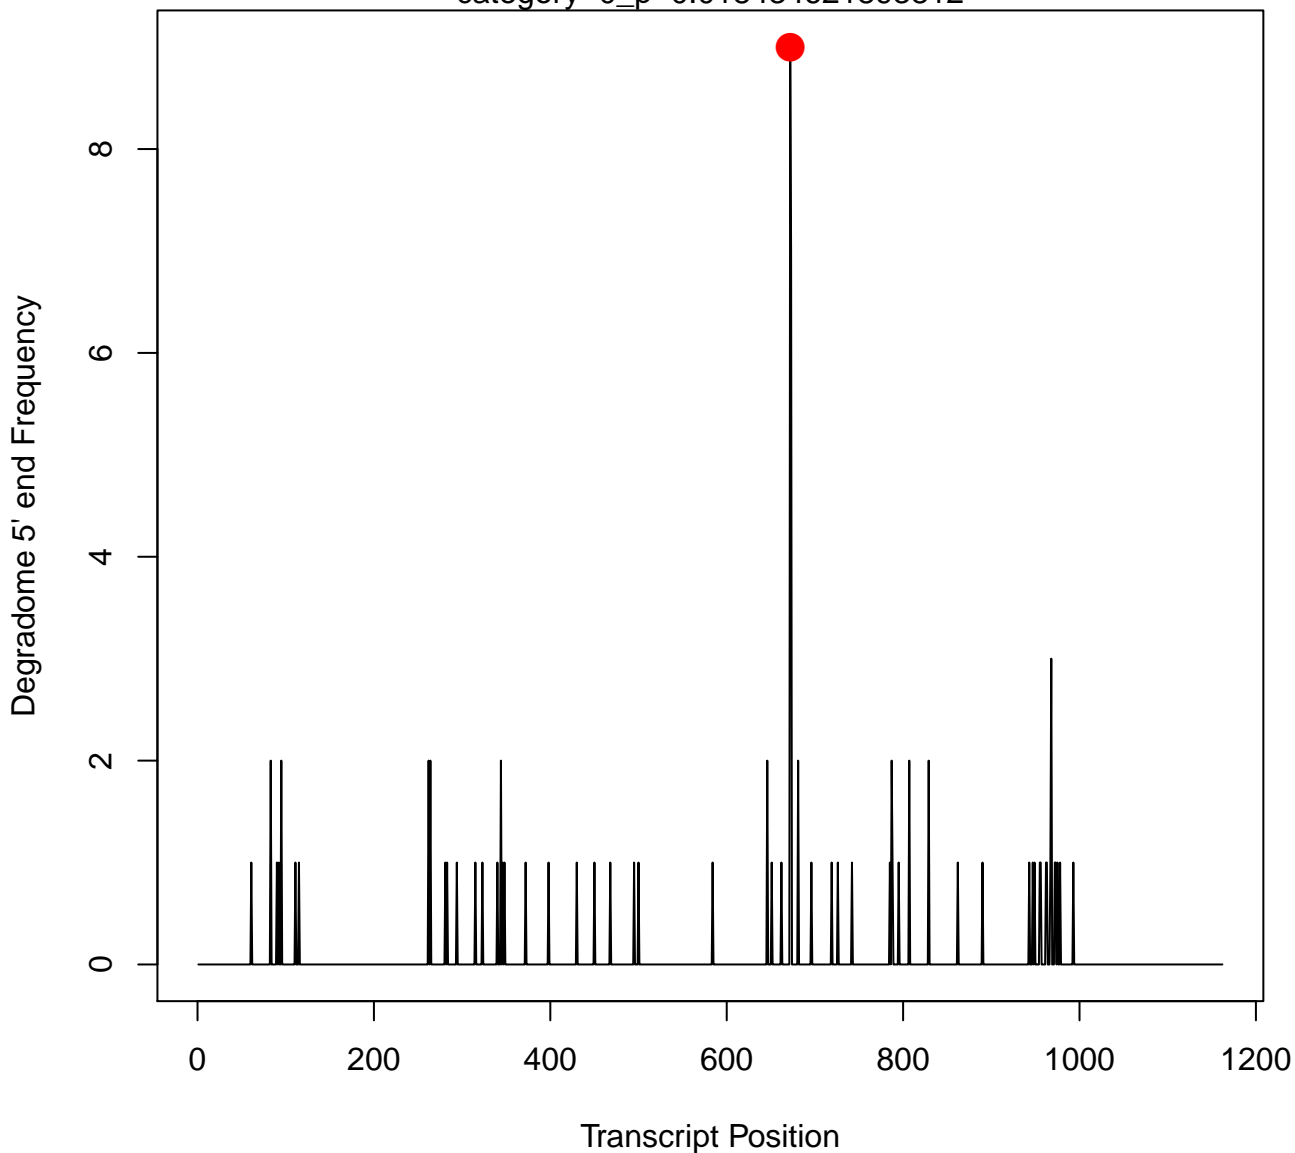

Supplement: s1 [file s1]

**T=Cluster-18410.113203\_Q=novel\_168\_S=778**

category=1\_p=0.0136323161298242

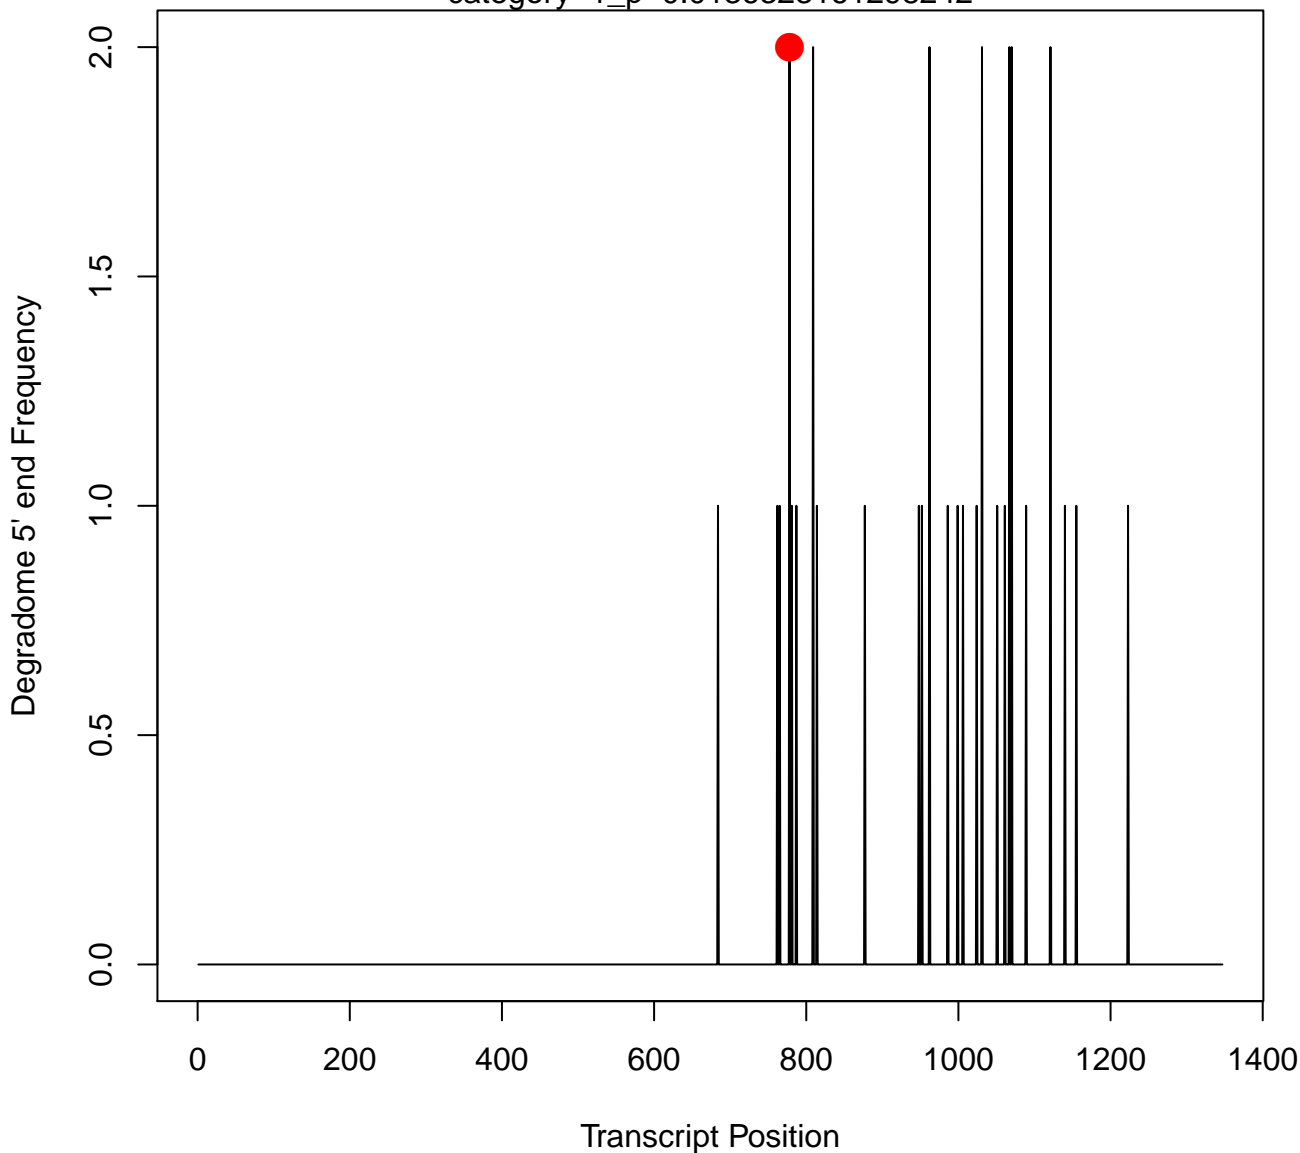

Supplement: s1 [file s1]

**T=Cluster-18410.112458\_Q=novel\_168\_S=384**

category=2\_p=0.0673240995462872

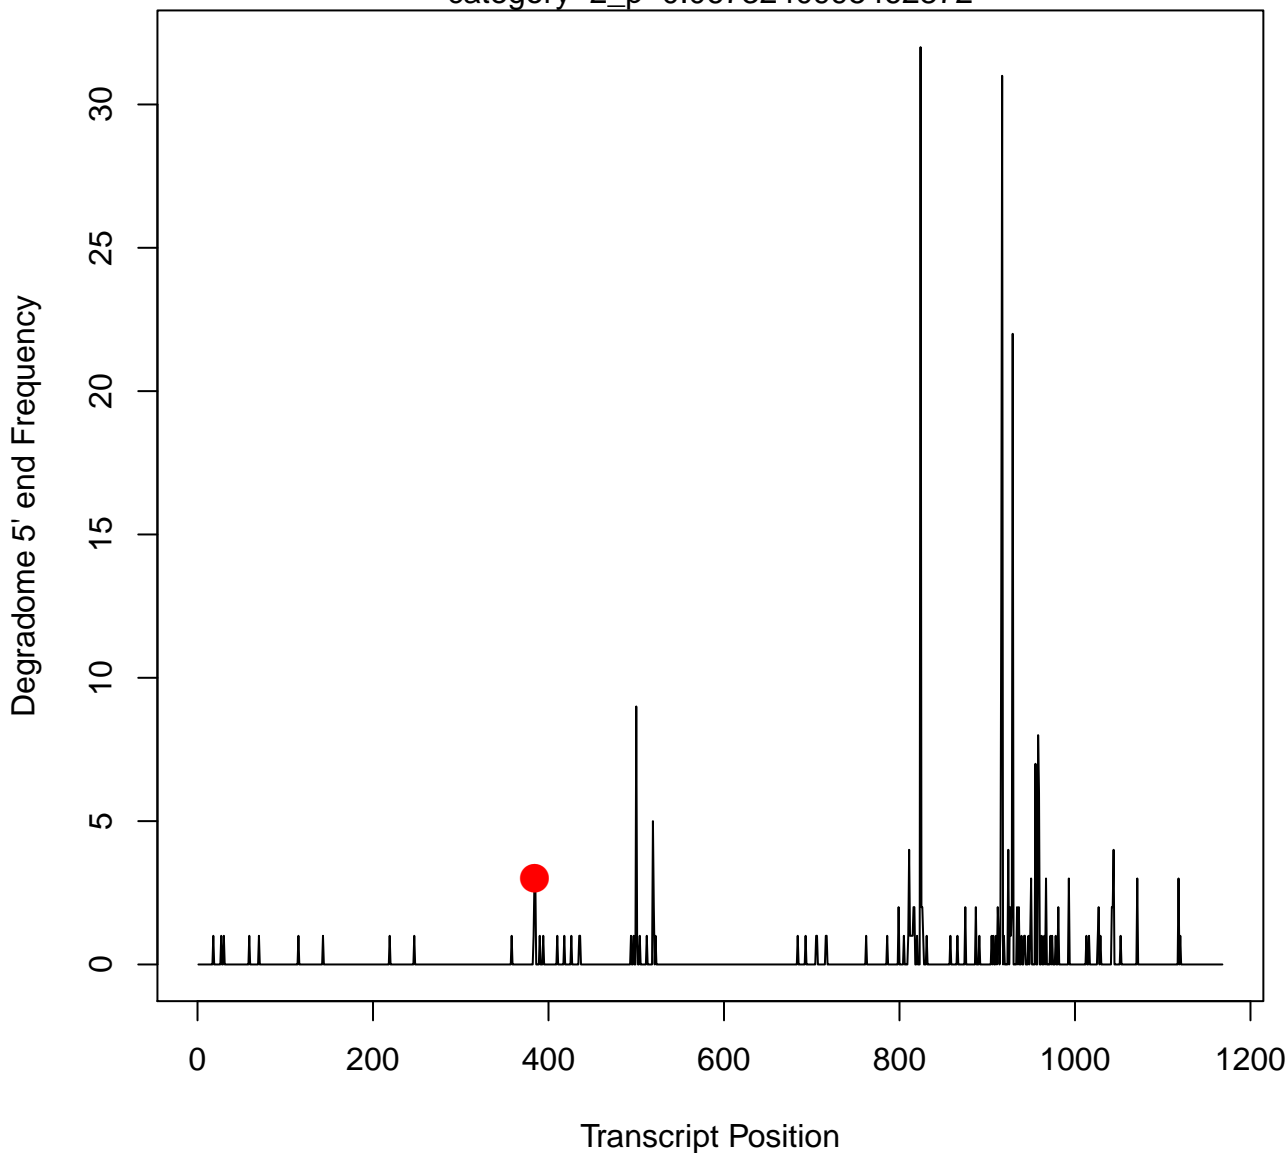

Supplement: s1 [file s1]

**T=Cluster-18410.3128\_Q=pma-miR1314\_S=70**

category=0\_p=0.00191355797950399

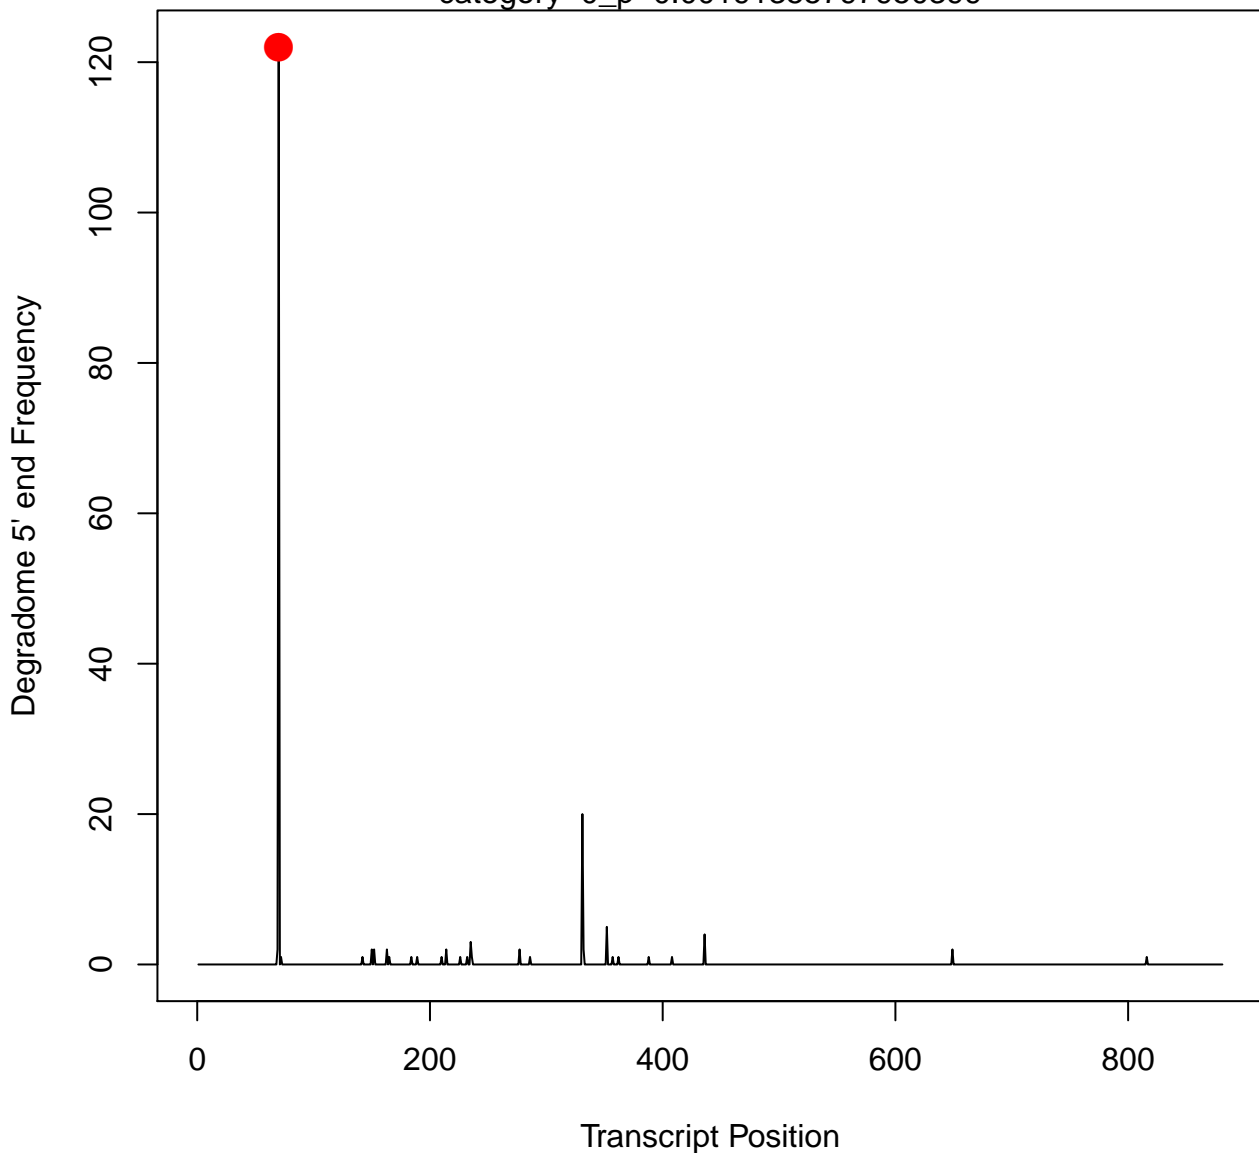

Supplement: s1 [file s1]

**T=Cluster-18410.95909\_Q=novel\_35\_S=470**

category=0\_p=0.00436846732795781

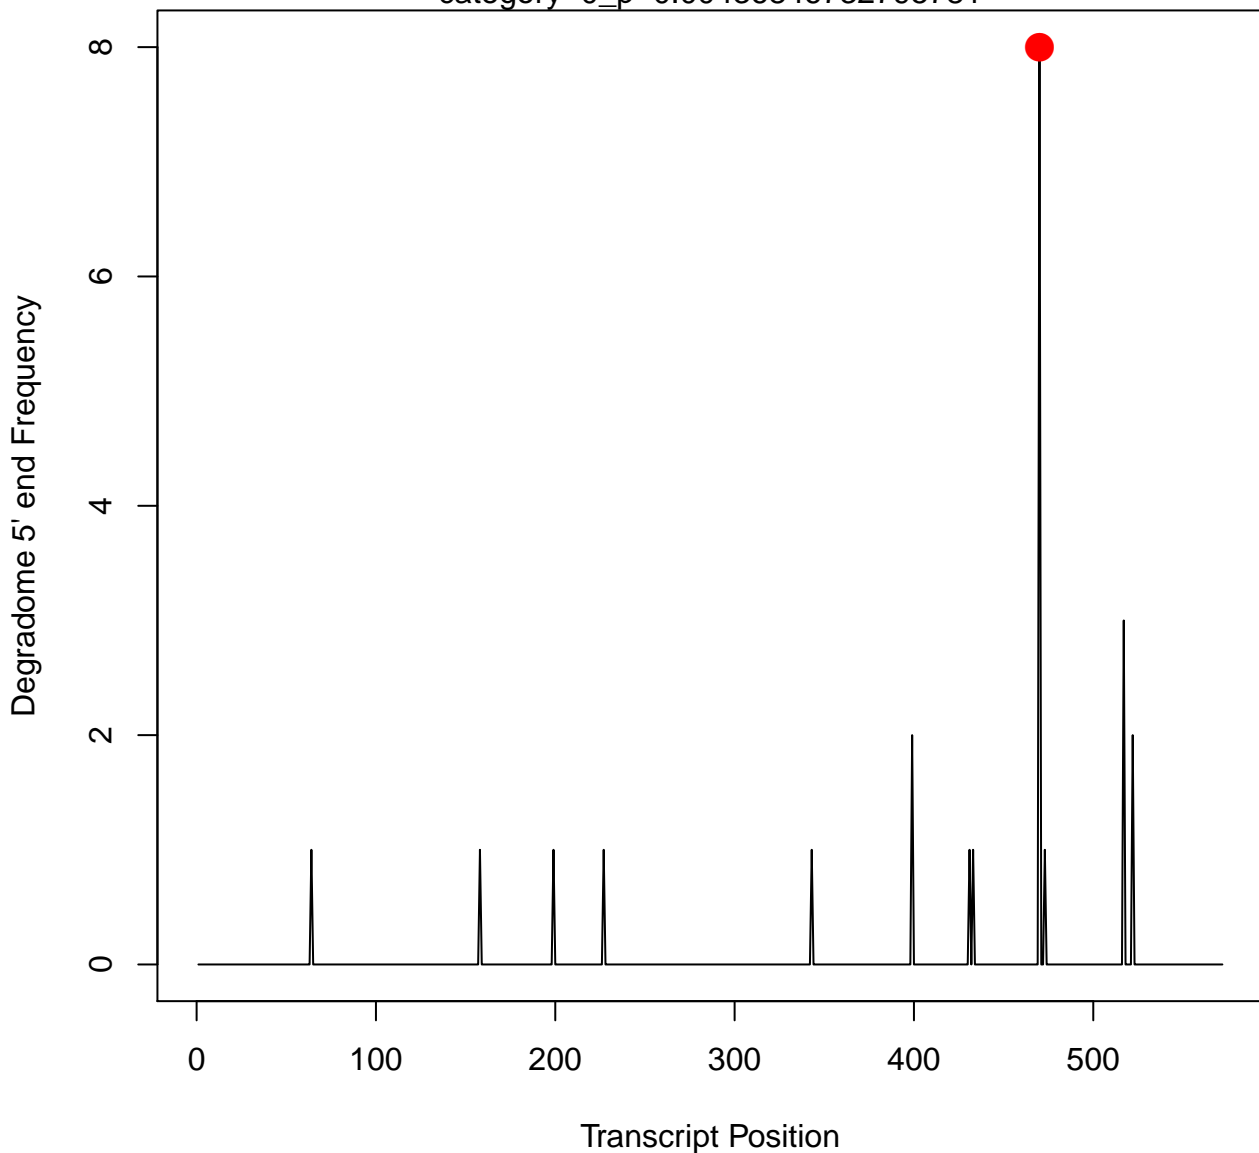

Supplement: s1 [file s1]

**T=Cluster-18410.52756\_Q=novel\_133\_S=34**

category=0\_p=0.0890861136844583

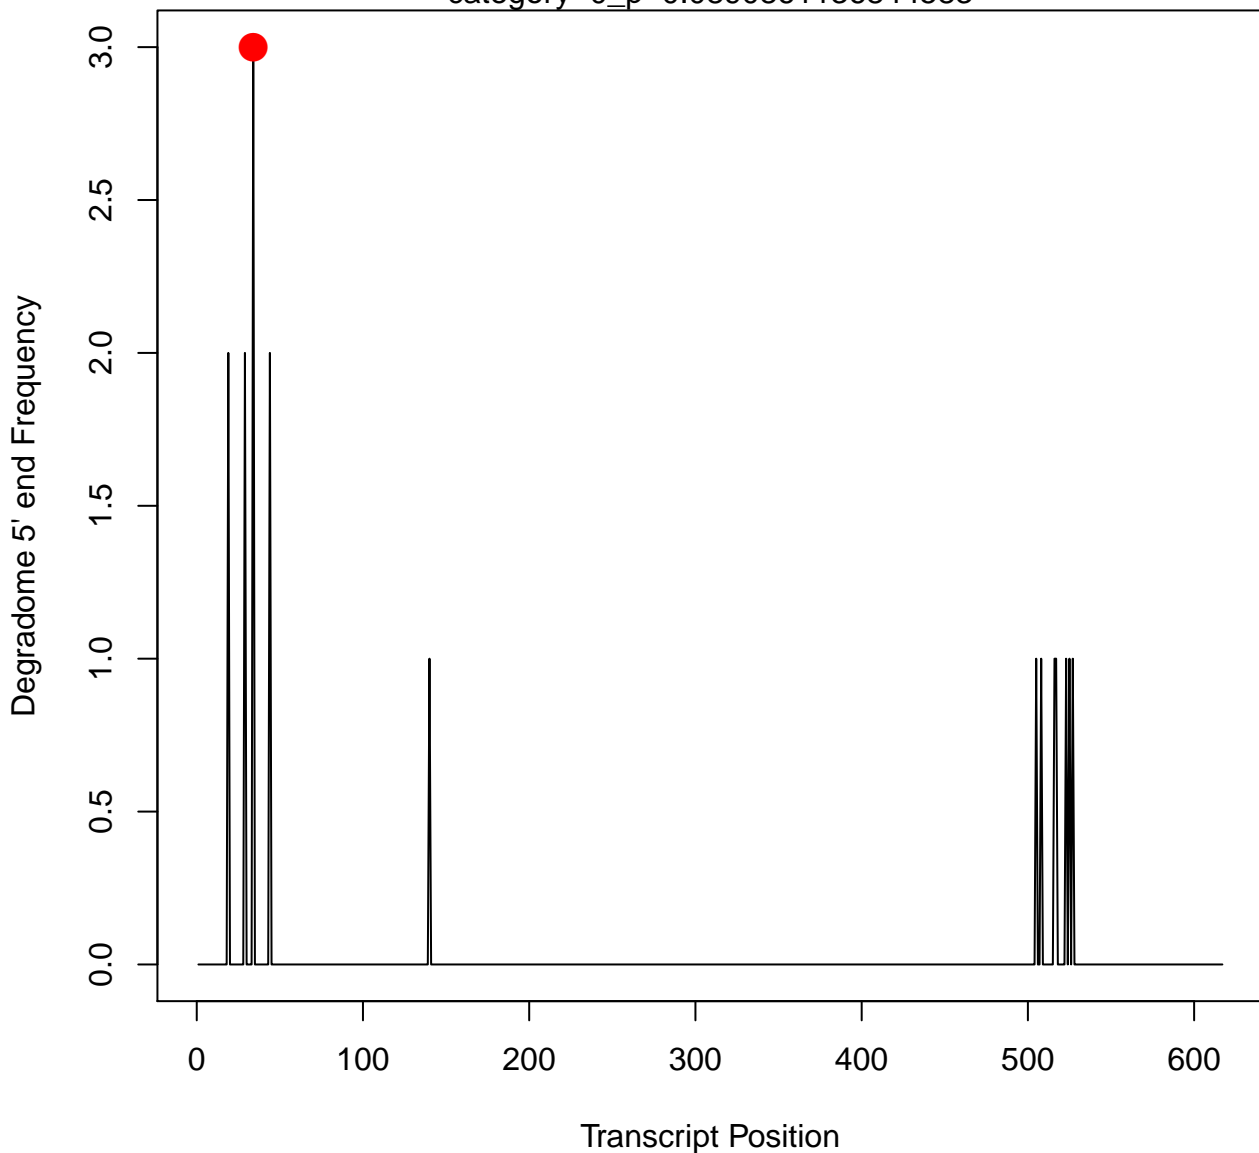

Supplement: s1 [file s1]

**T=Cluster-18410.62718\_Q=novel\_156\_S=373**

category=3\_p=0.0831820937889345

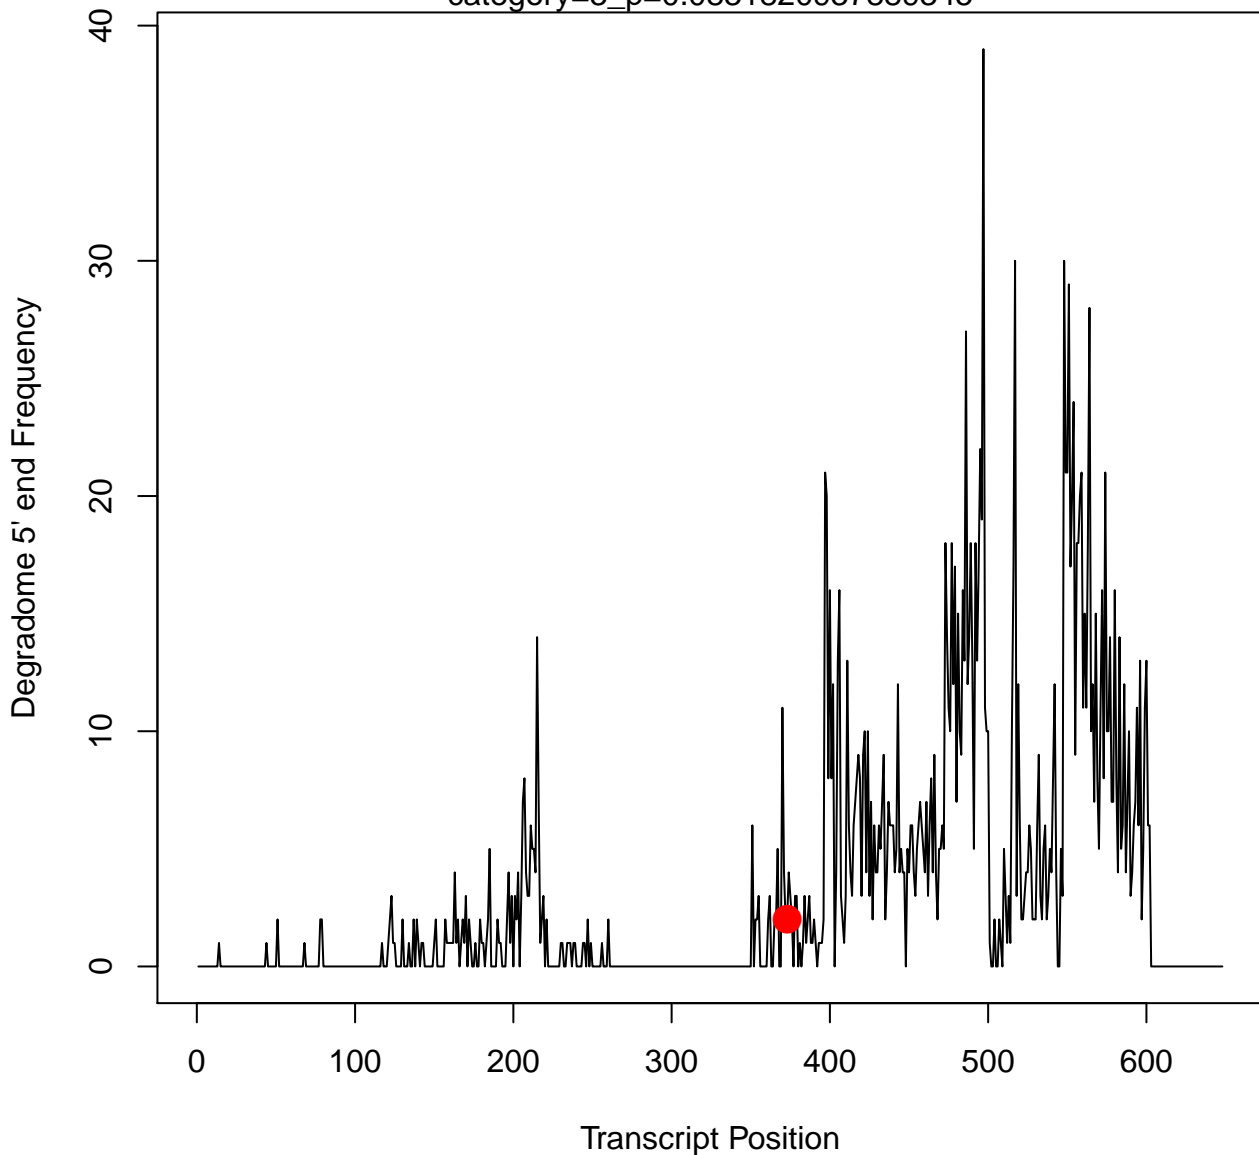

Supplement: s1 [file s1]

**T=Cluster-18410.33851\_Q=novel\_148\_S=21**

category=0\_p=0.00355083585007077

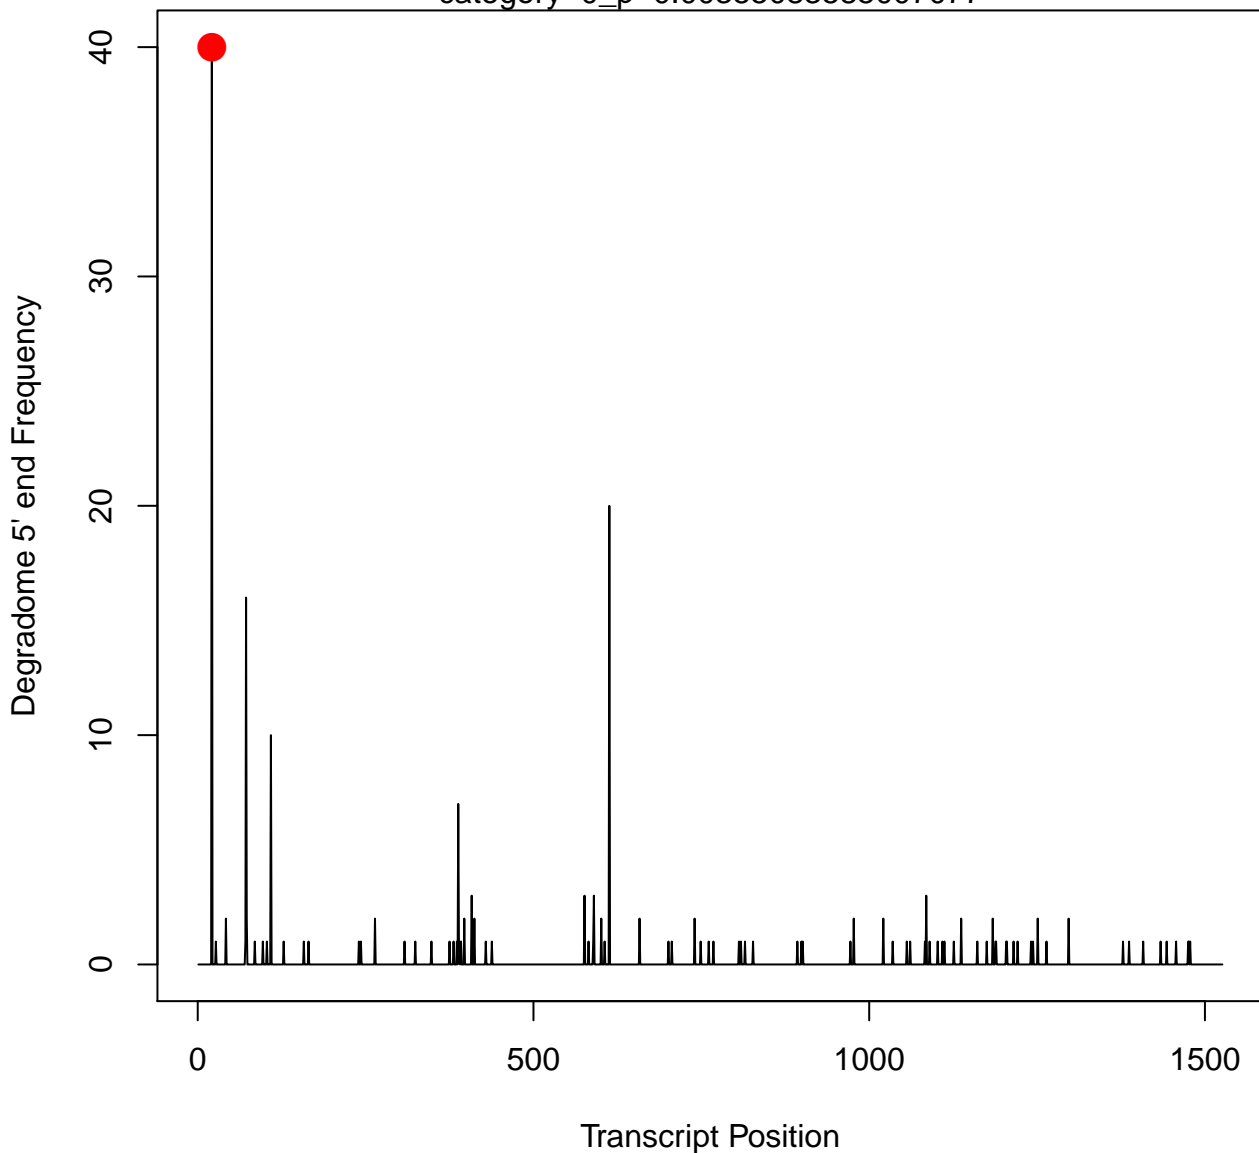

Supplement: s1 [file s1]

**T=Cluster-18410.36502\_Q=novel\_151\_S=476**

category=4\_p=0.024452609380235

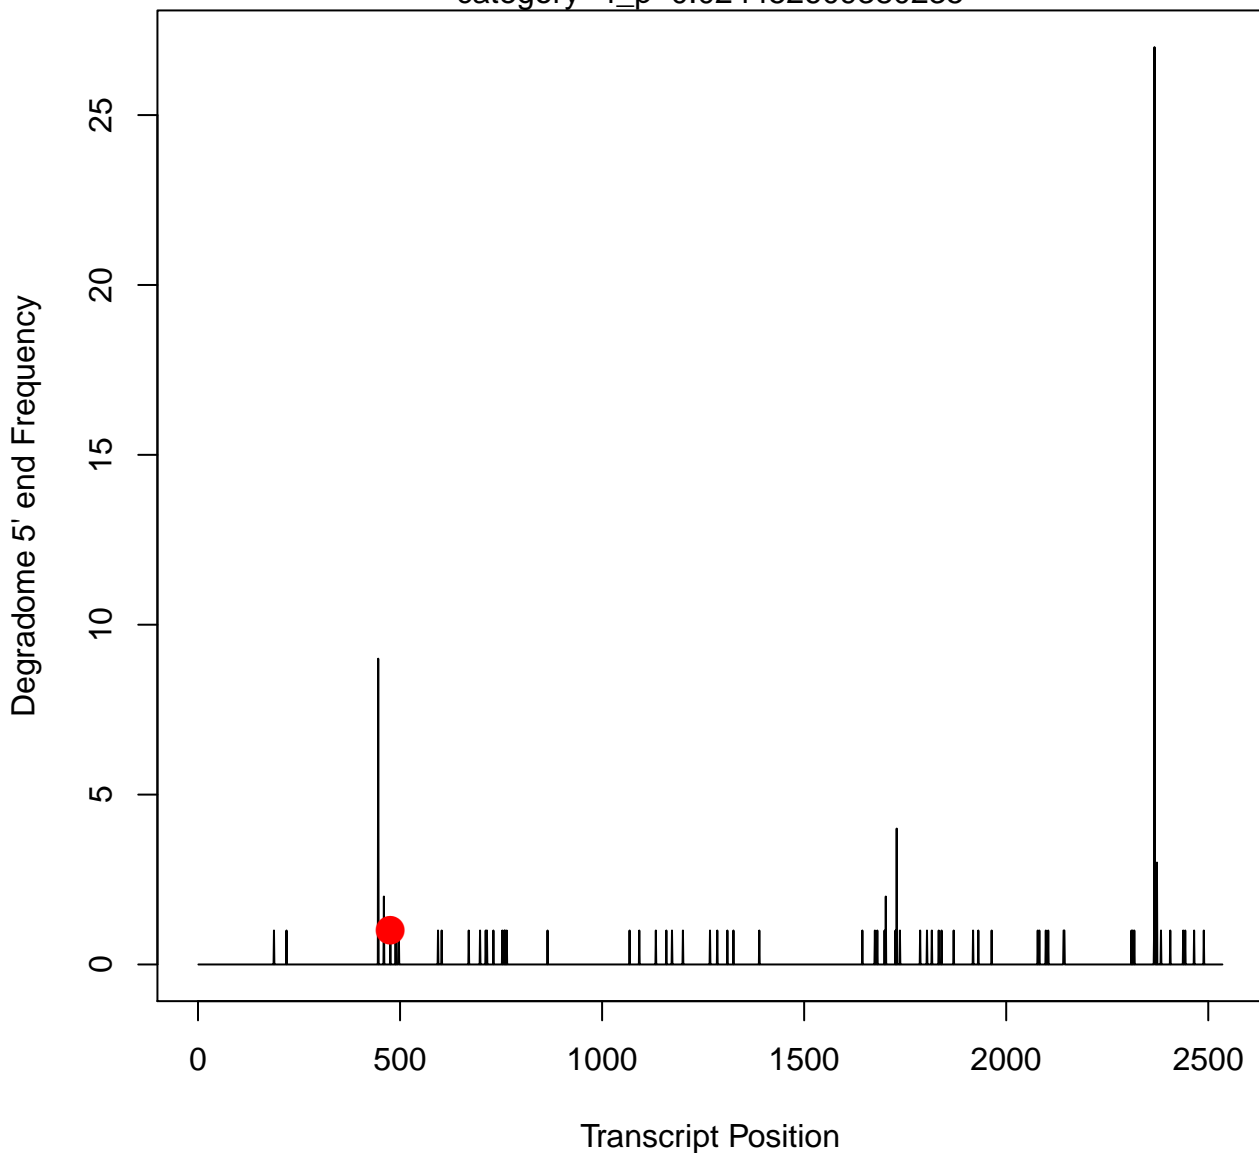

Supplement: s1 [file s1]

**T=Cluster-18410.101188\_Q=novel\_144\_S=937**

category=2\_p=0.0454020367599618

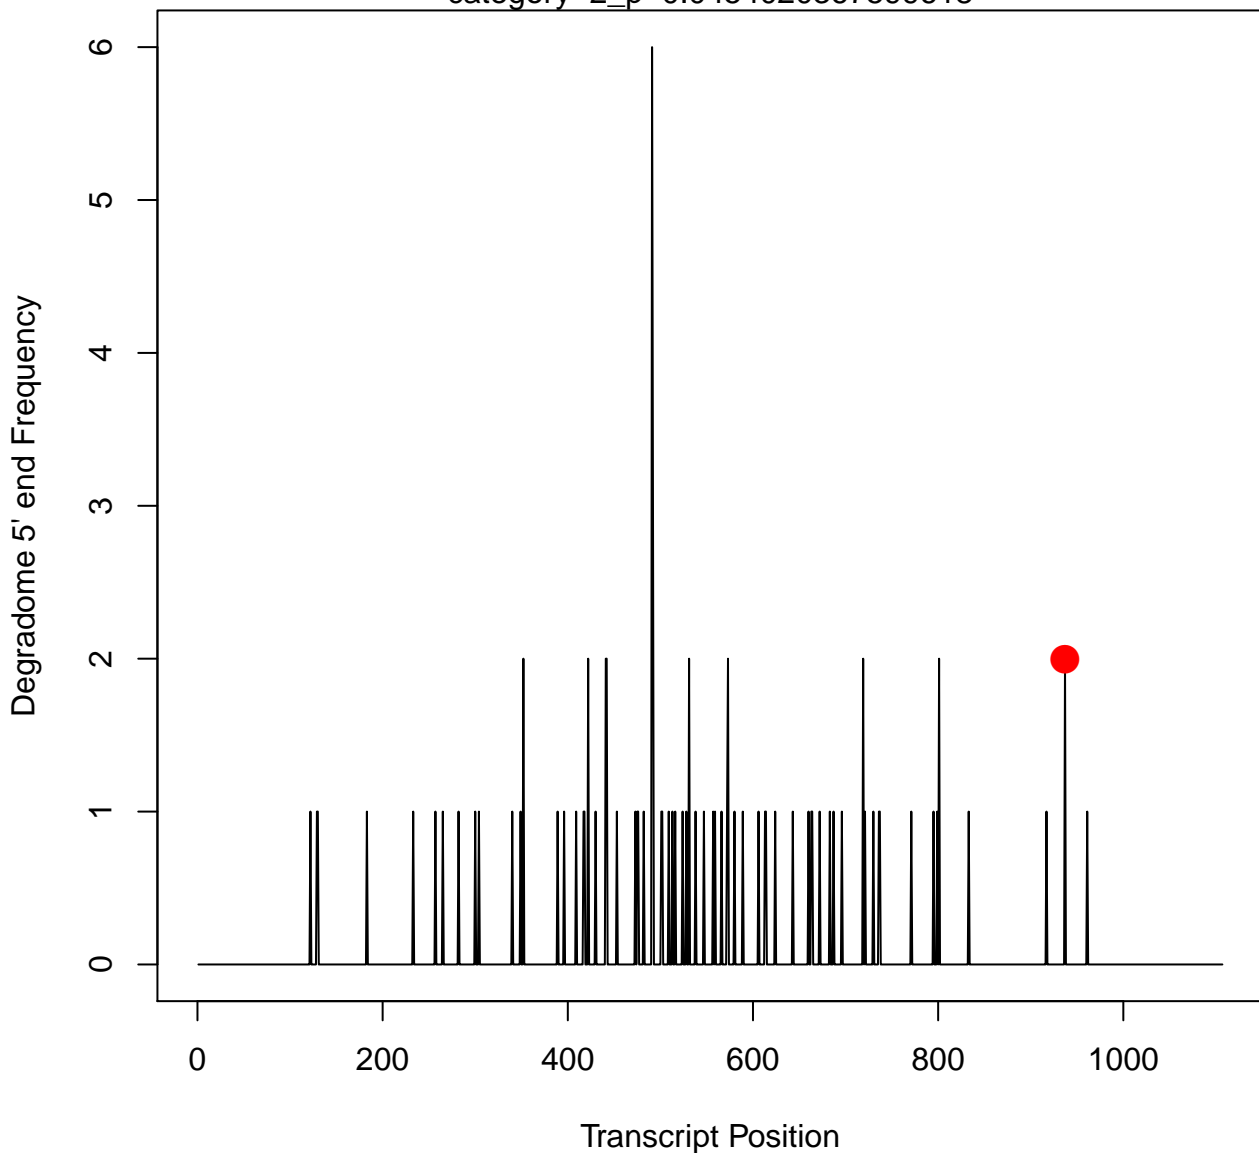

Supplement: s1 [file s1]

**T=Cluster-18410.34599\_Q=novel\_148\_S=437**

category=0\_p=0.0138580732628661

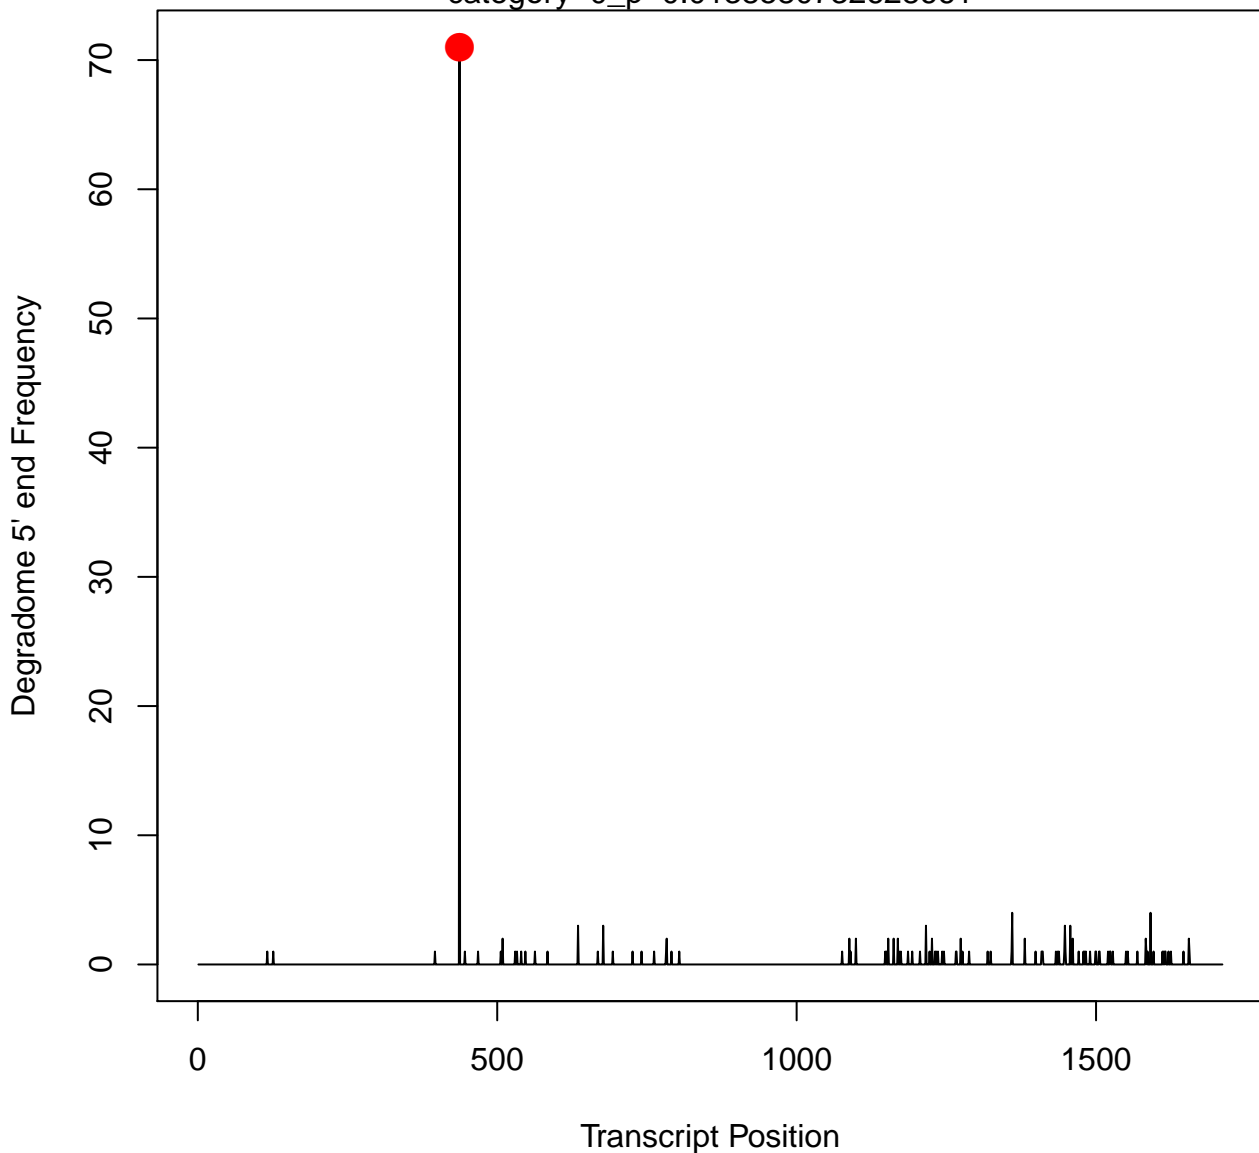

Supplement: s1 [file s1]

**T=Cluster-18410.38913\_Q=novel\_66\_S=855**

category=0\_p=0.00300537520191857

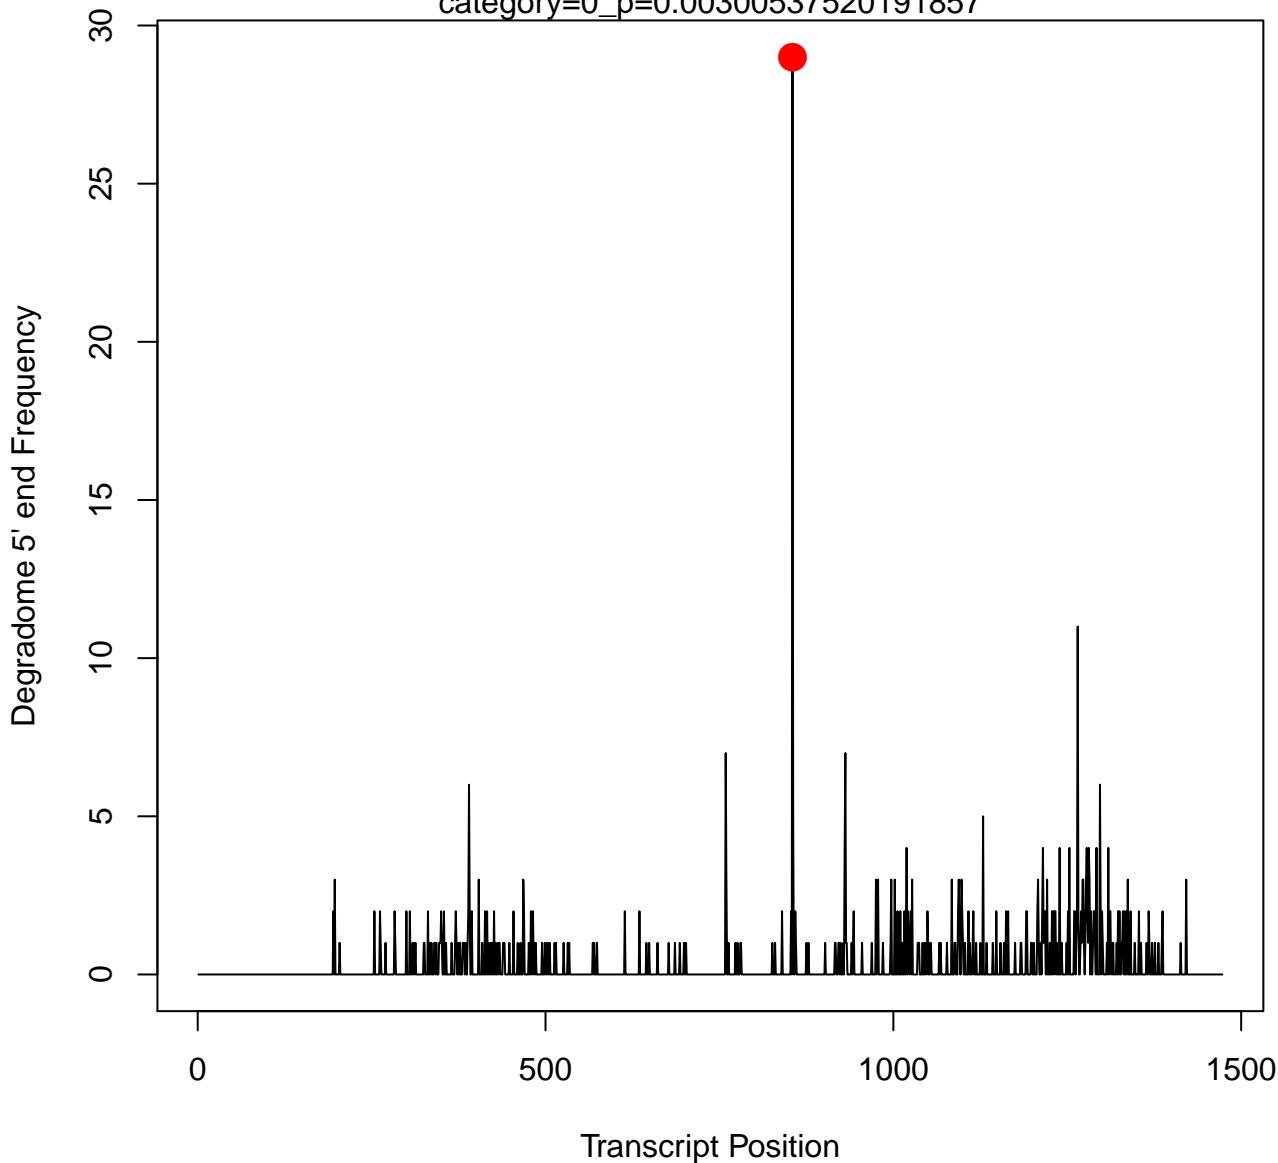

Supplement: s1 [file s1]

**T=Cluster-18410.43736\_Q=novel\_127\_S=453**

category=3\_p=0.0214776002691899

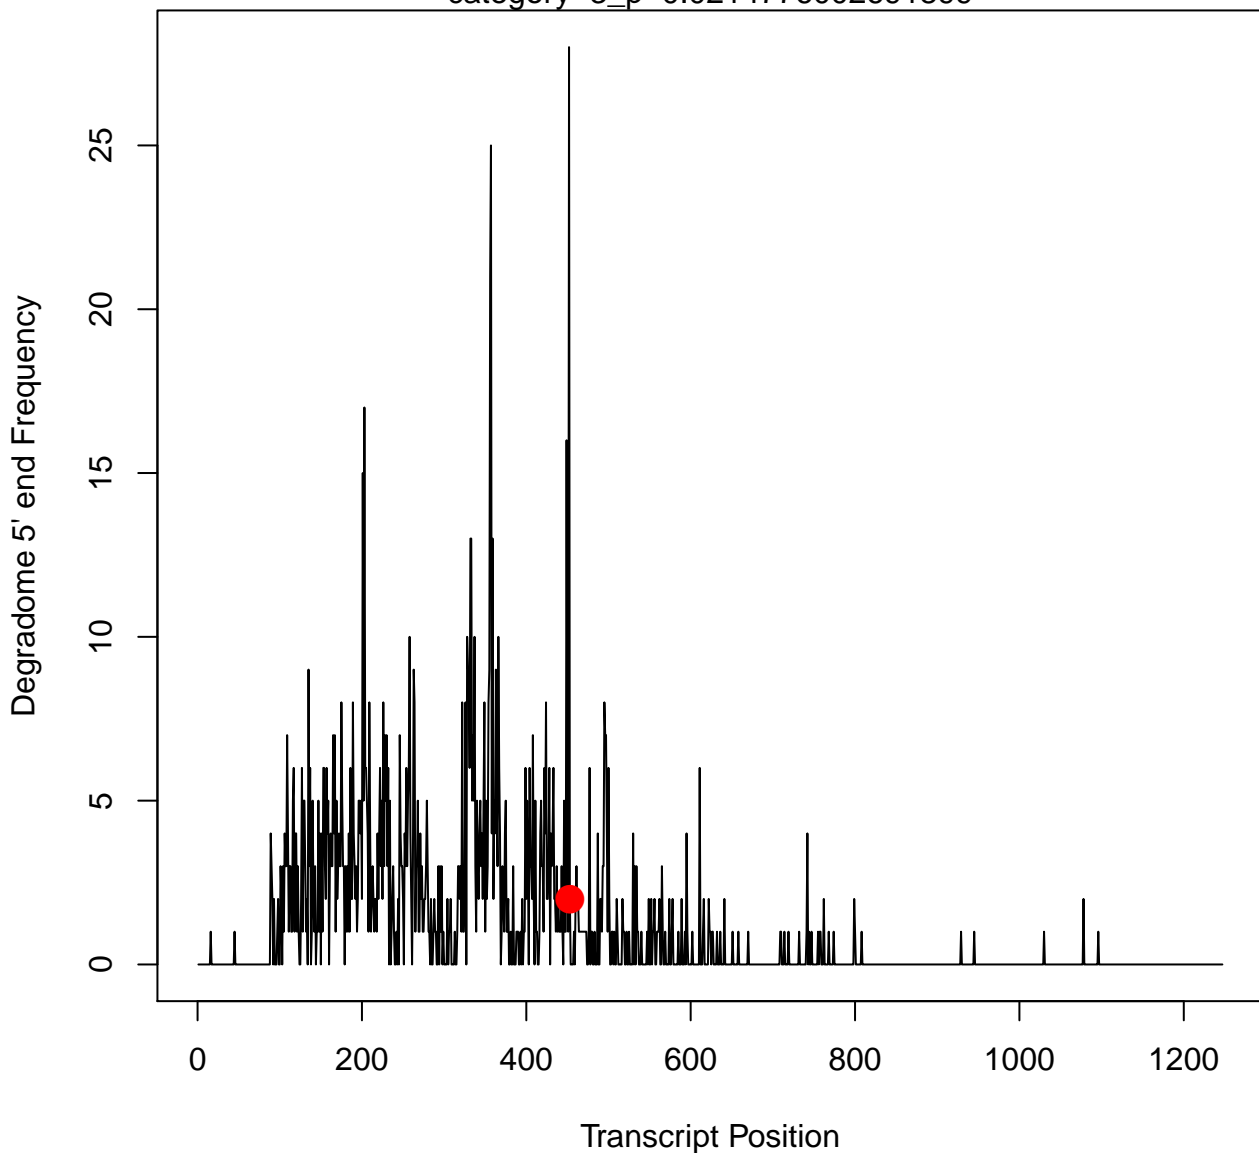

Supplement: s1 [file s1]

**T=Cluster-18410.94786\_Q=pma-miR946a-3p\_S=345**

category=0\_p=0.0396878027235767

Degradome 5' end Frequency

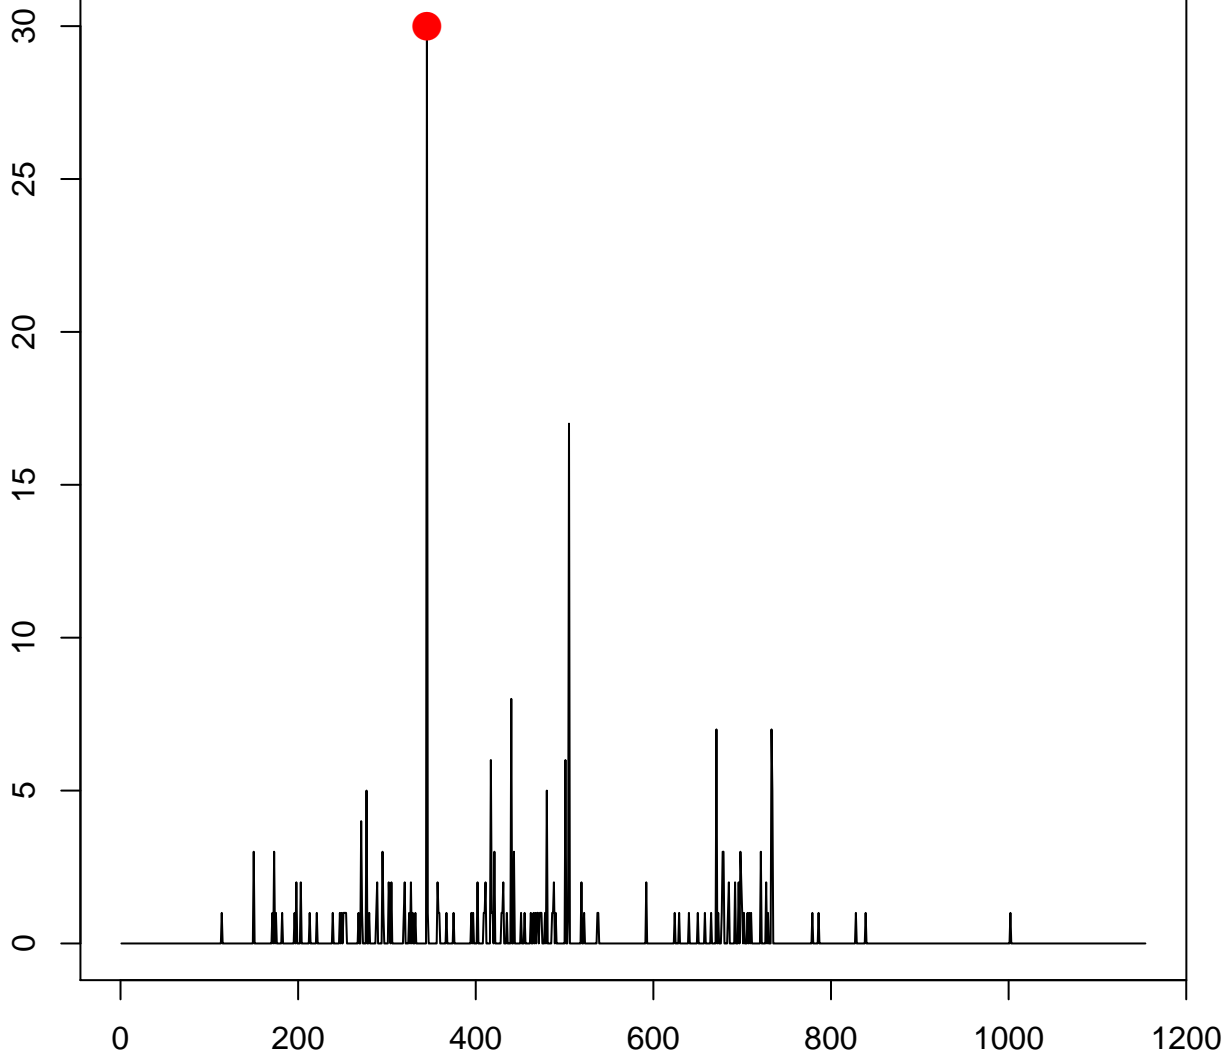

Transcript Position

Supplement: s1 [file s1]

**T=Cluster-18410.26812\_Q=novel\_103\_S=408**

category=2\_p=0.0564267304887326

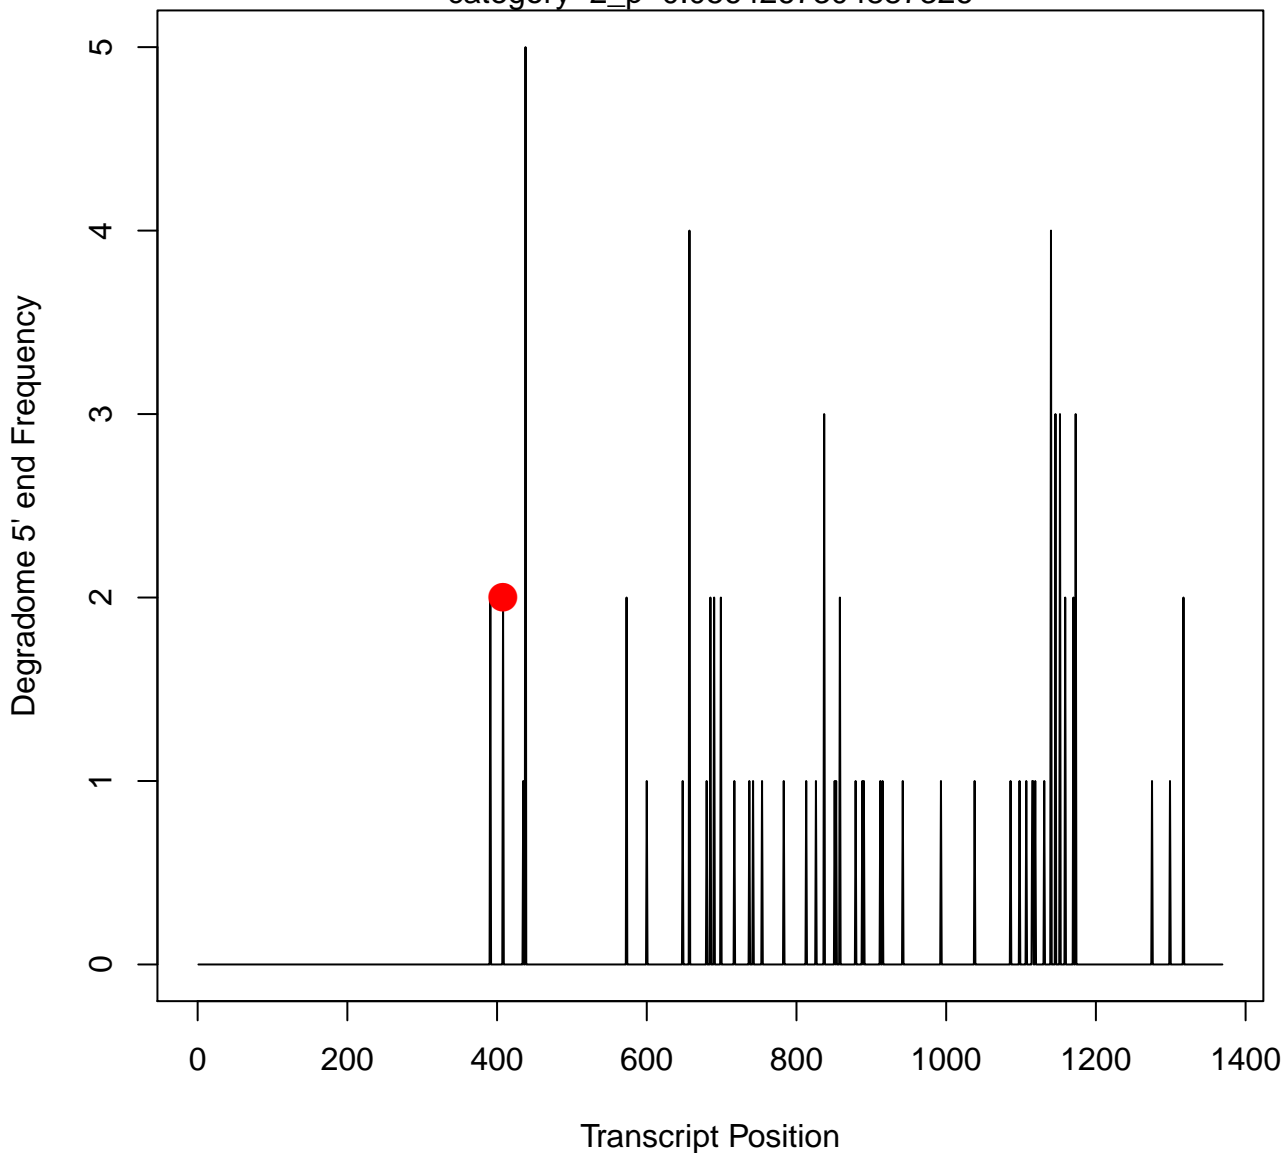

Supplement: s1 [file s1]

**T=Cluster-18410.96133\_Q=novel\_65\_S=1180**

category=0\_p=0.0205809366280733

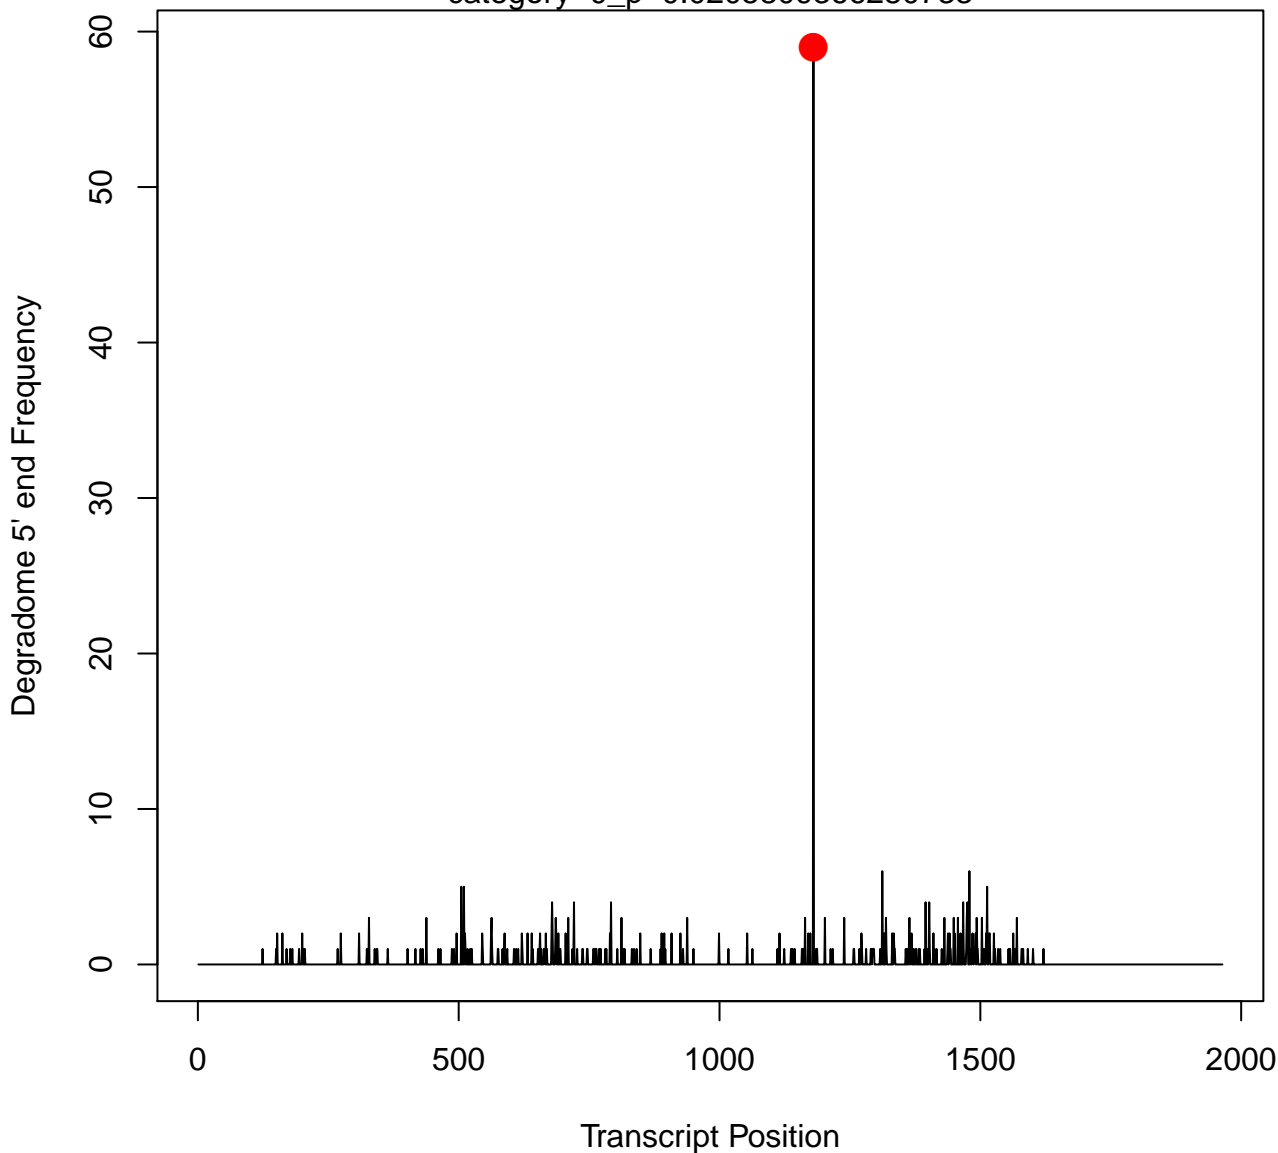

Supplement: s1 [file s1]

**T=Cluster-18410.57509\_Q=novel\_59\_S=39**

category=0\_p=0.0304467552845014

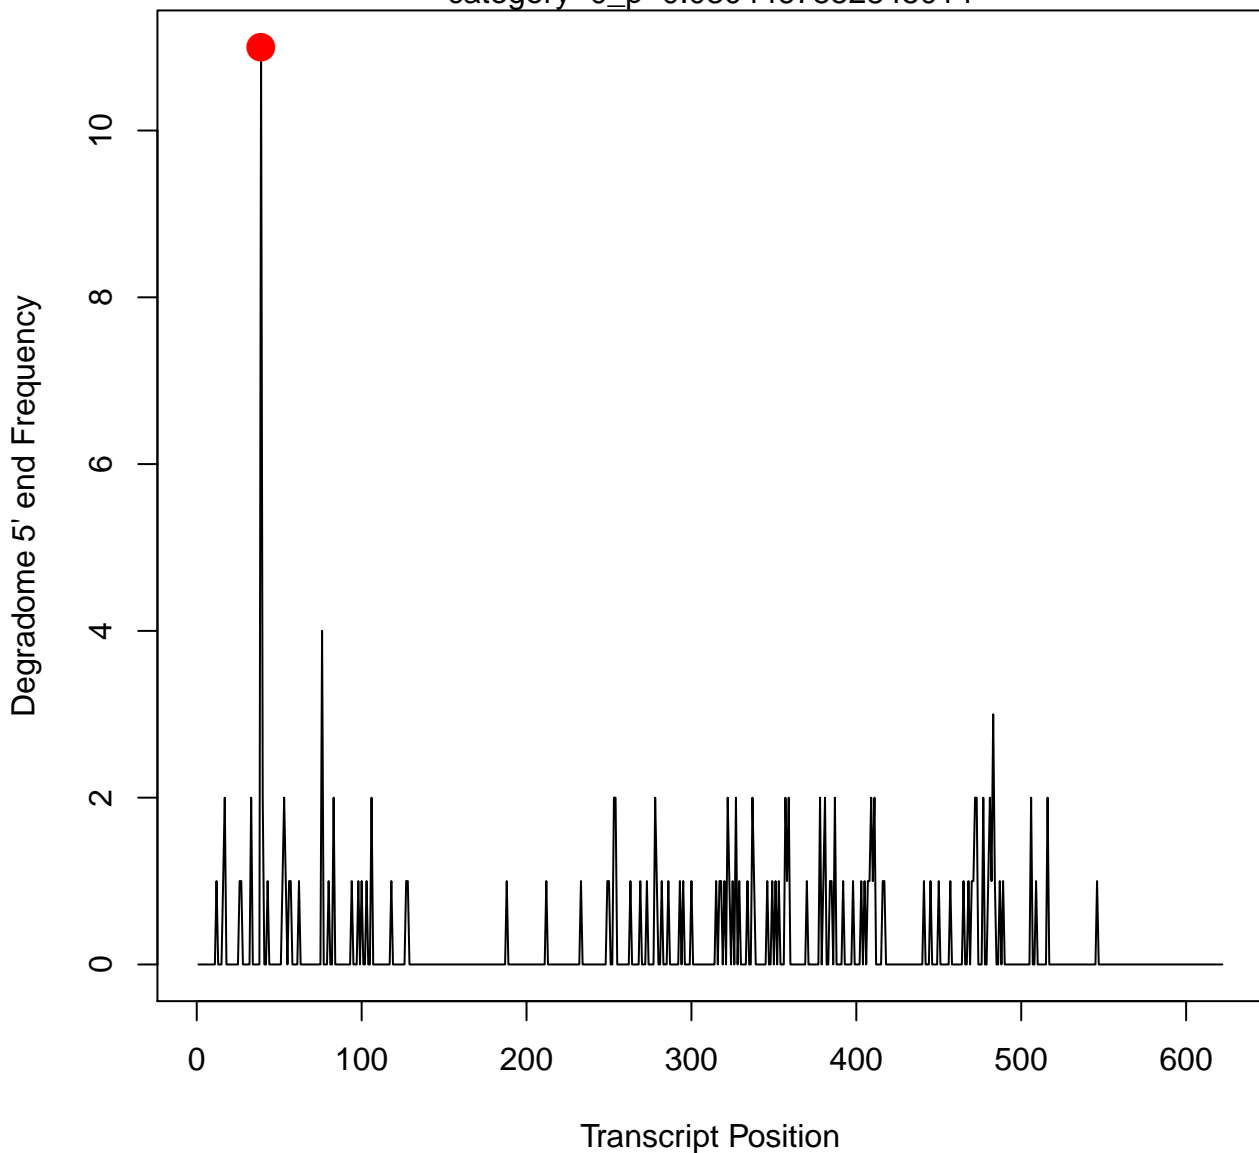

Supplement: s1 [file s1]

**T=Cluster-18410.37240\_Q=novel\_35\_S=96**

category=0\_p=0.0630480697297472

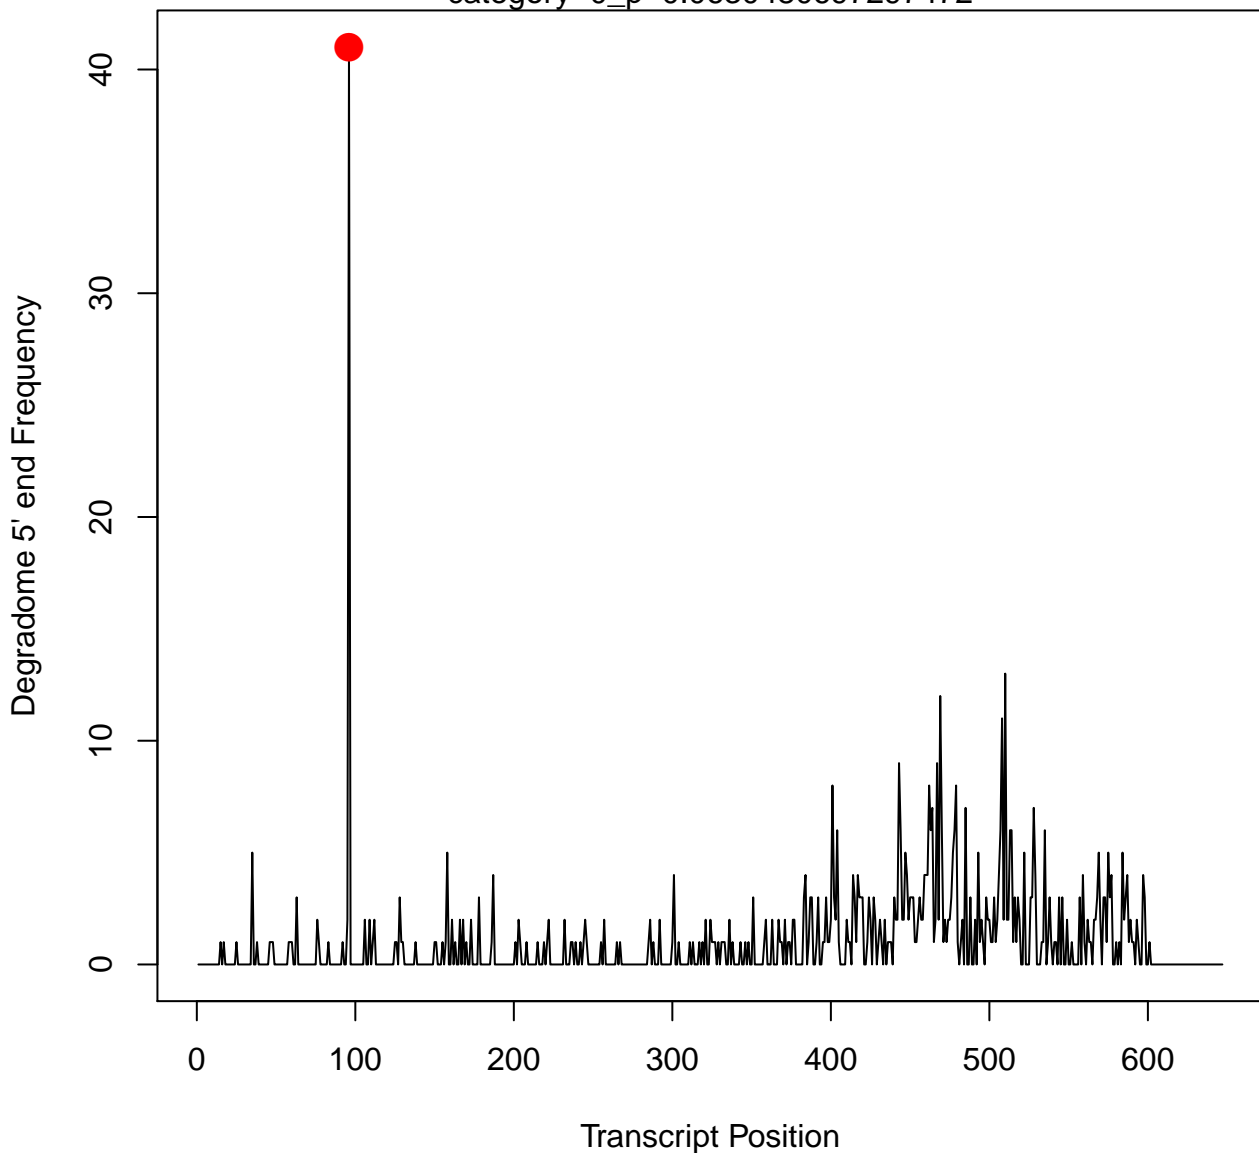

Supplement: s1 [file s1]

**T=Cluster-18410.37549\_Q=novel\_20\_S=1852**

category=0\_p=0.00654553945797942

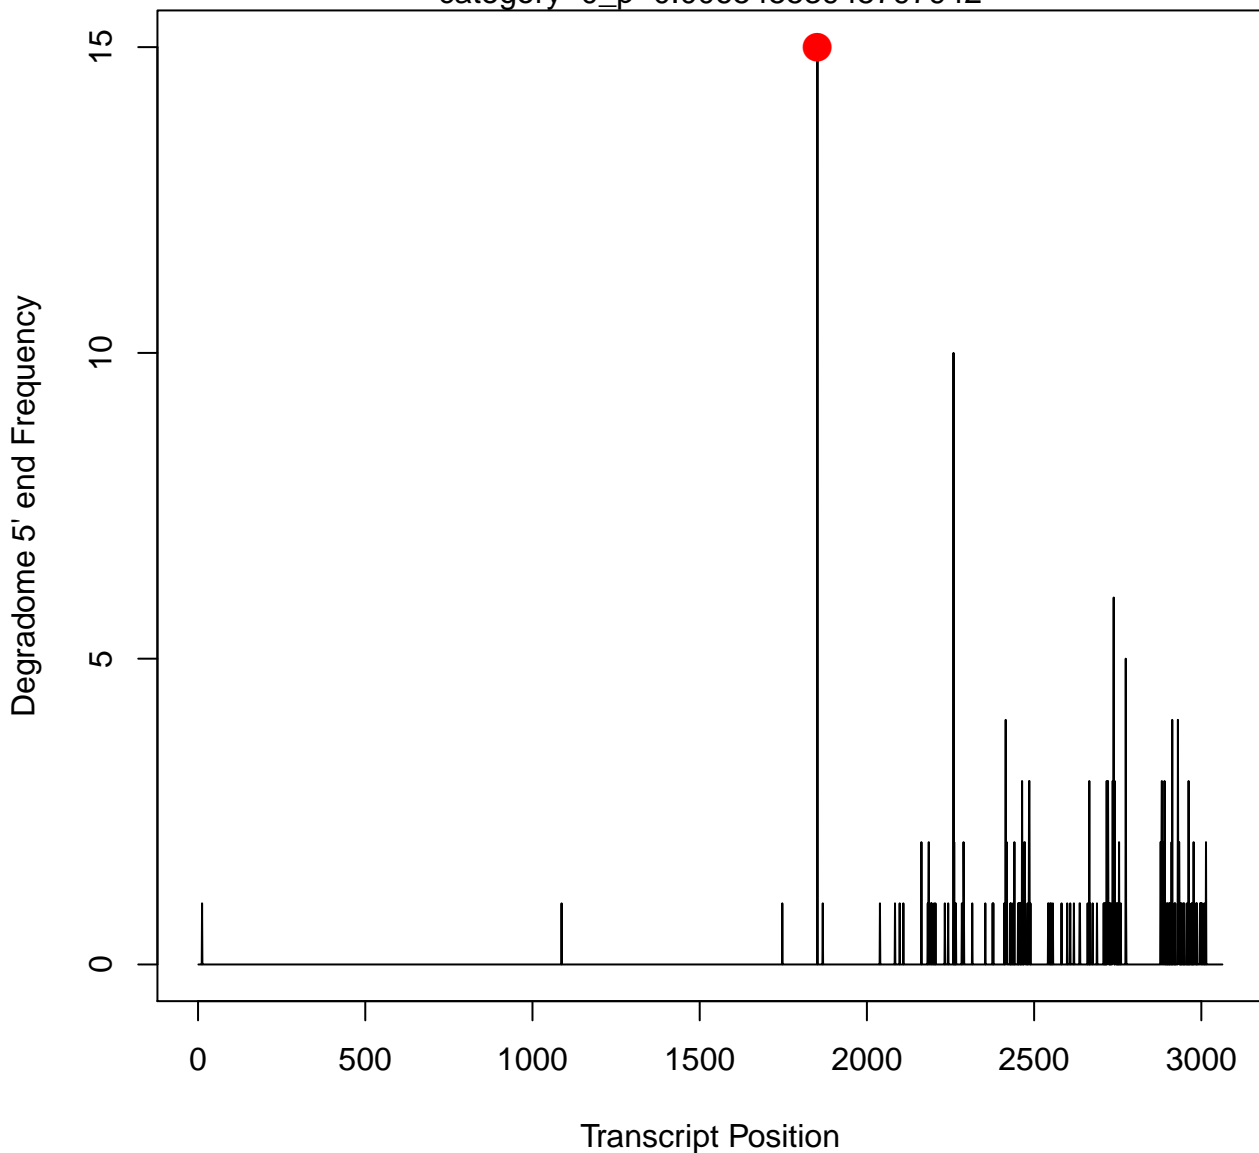

Supplement: s1 [file s1]

**T=Cluster-18410.80621\_Q=novel\_14\_S=829**

category=0\_p=0.0111560245494552

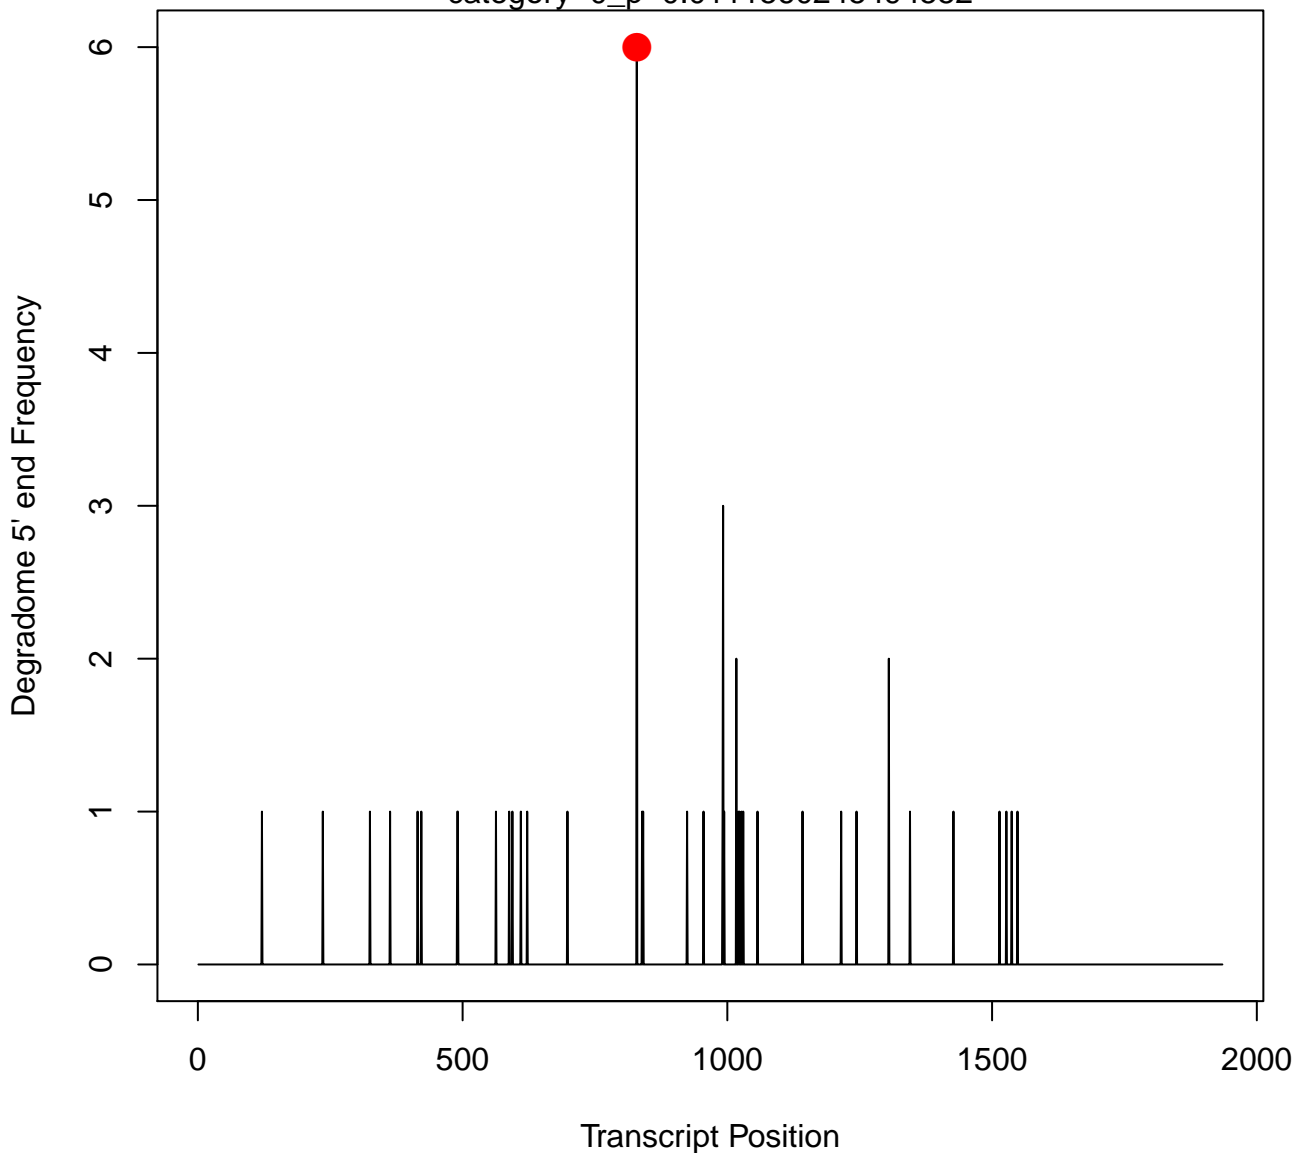

Supplement: s1 [file s1]

**T=Cluster-18410.35178\_Q=pma-miR1312\_S=27**

category=1\_p=0.0185433119647906

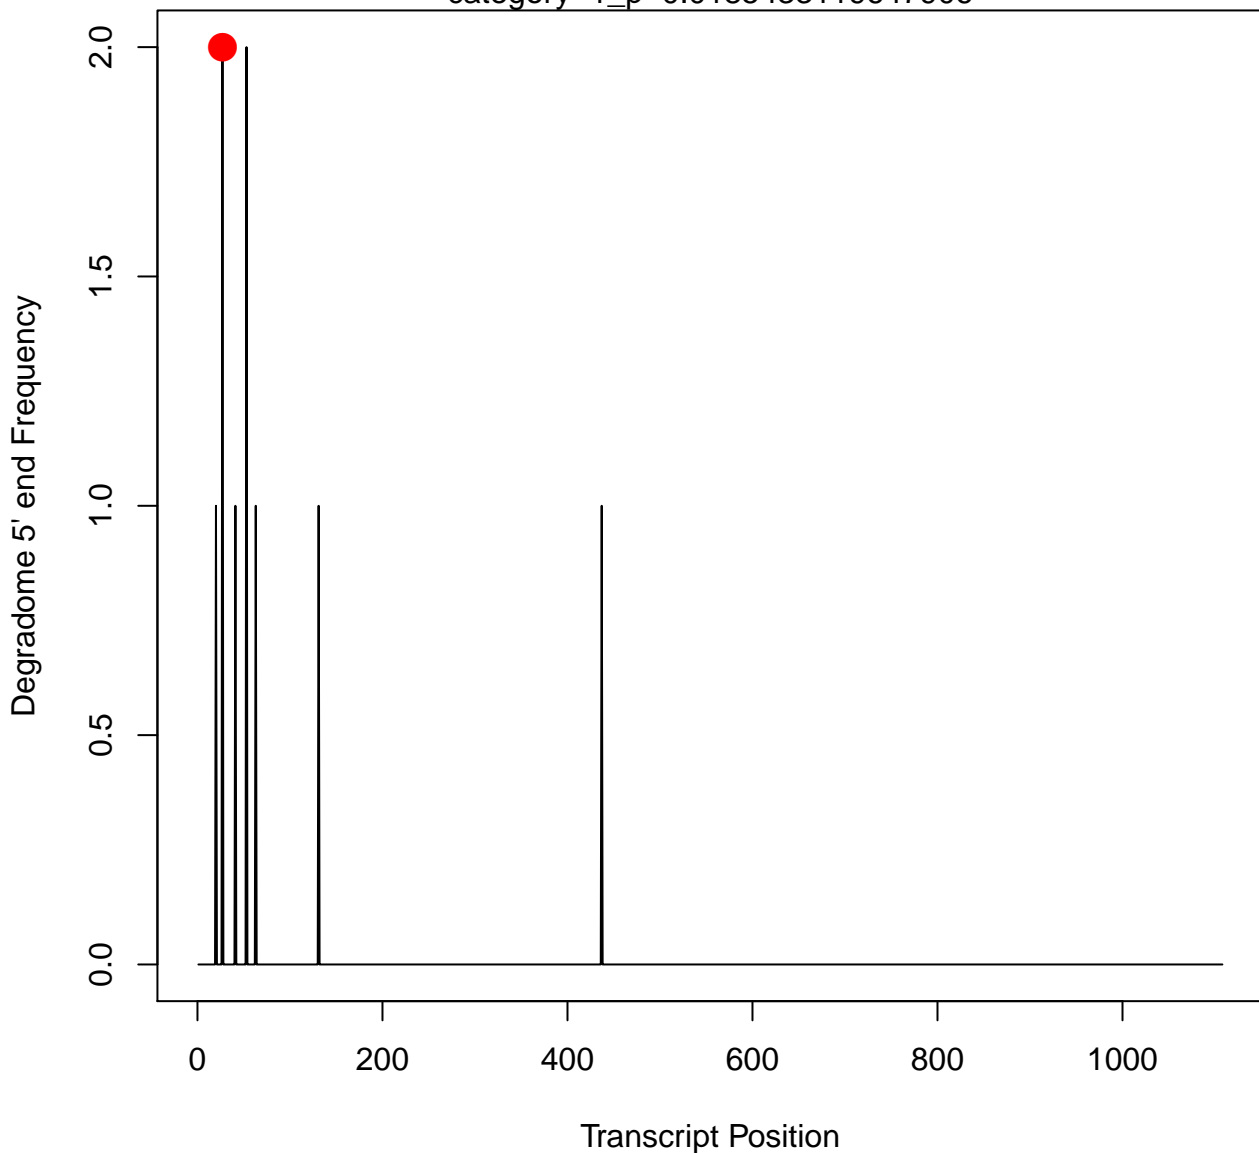

Supplement: s1 [file s1]

**T=Cluster-18410.33065\_Q=novel\_11\_S=478**

category=0\_p=0.0197766191371372

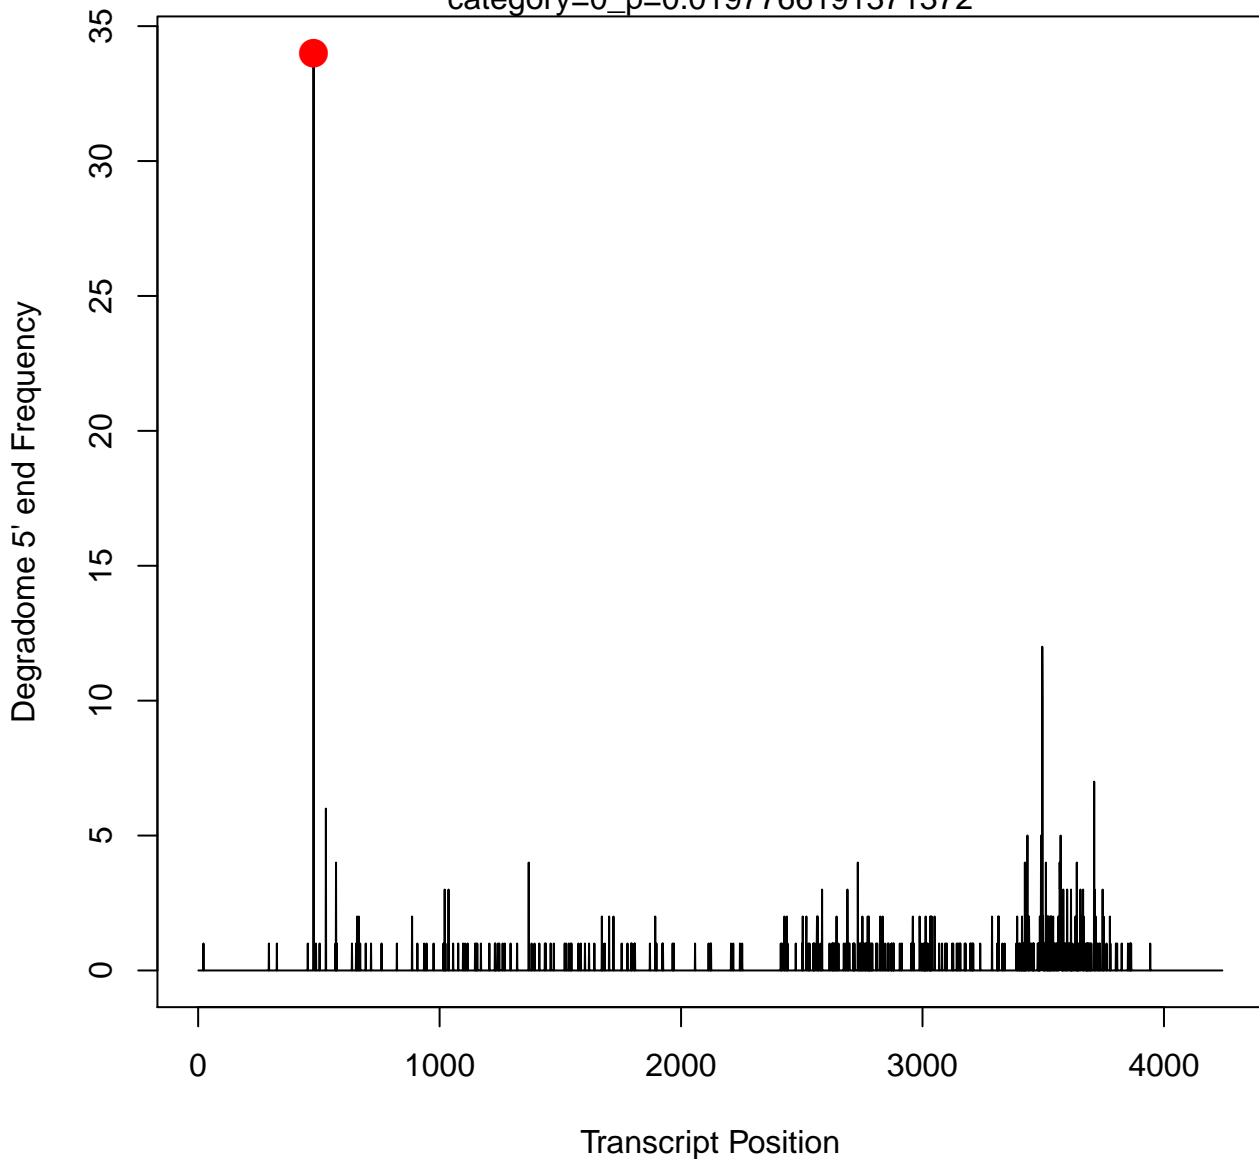

Supplement: s1 [file s1]

**T=Cluster-18410.33949\_Q=novel\_94\_S=372**

category=2\_p=0.0115490438418195

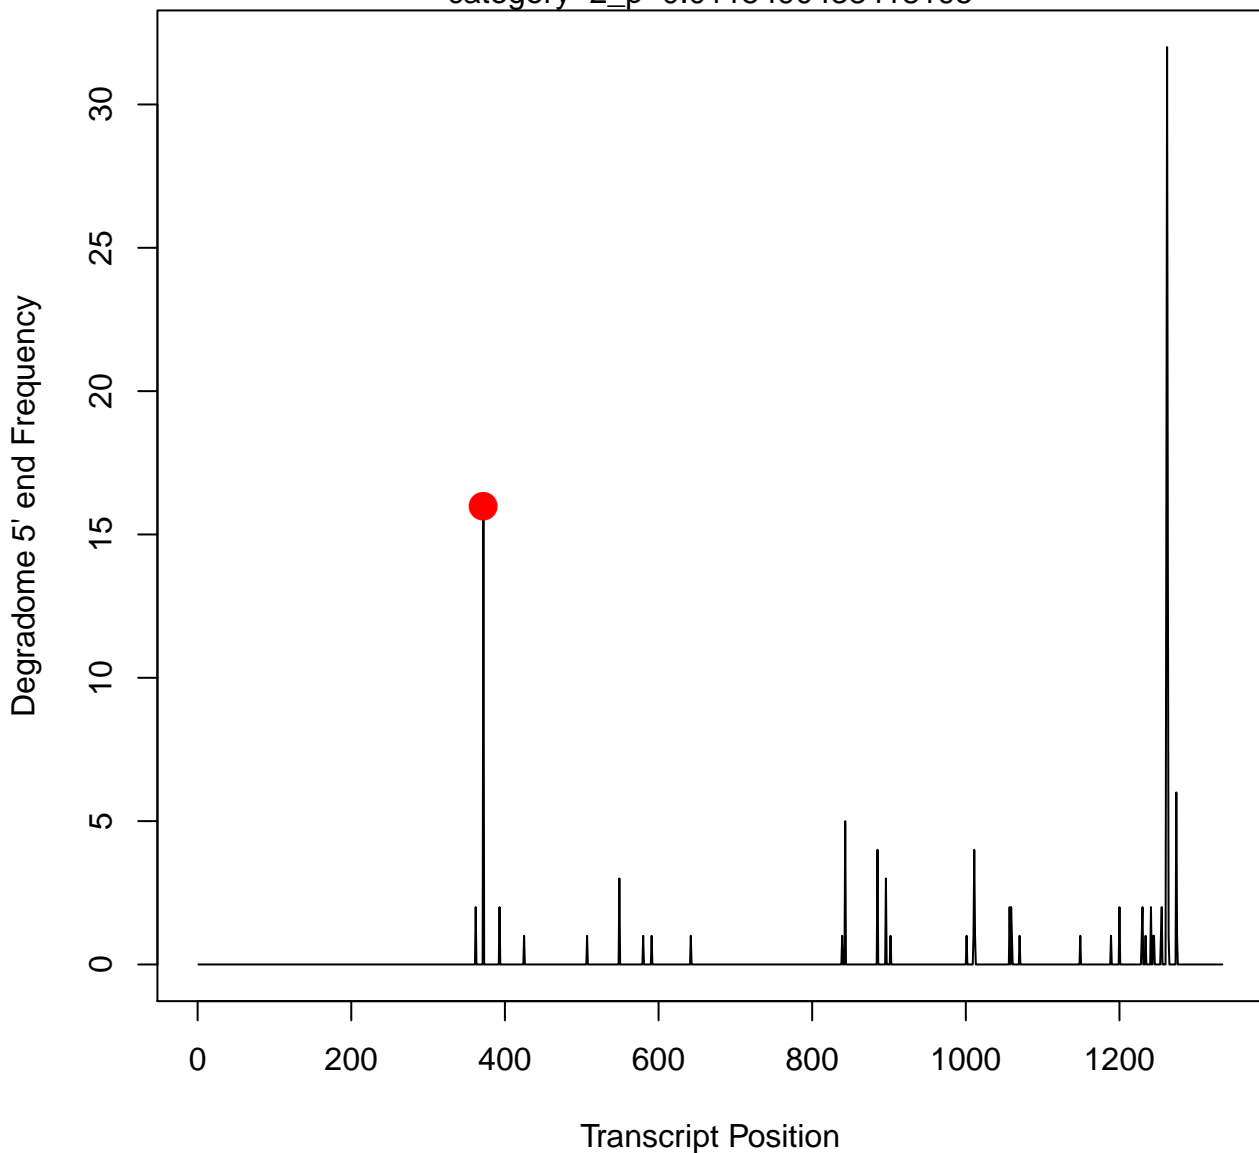

Supplement: s1 [file s1]

**T=Cluster-18410.92362\_Q=novel\_159\_S=332**

category=0\_p=0.0211167816003845

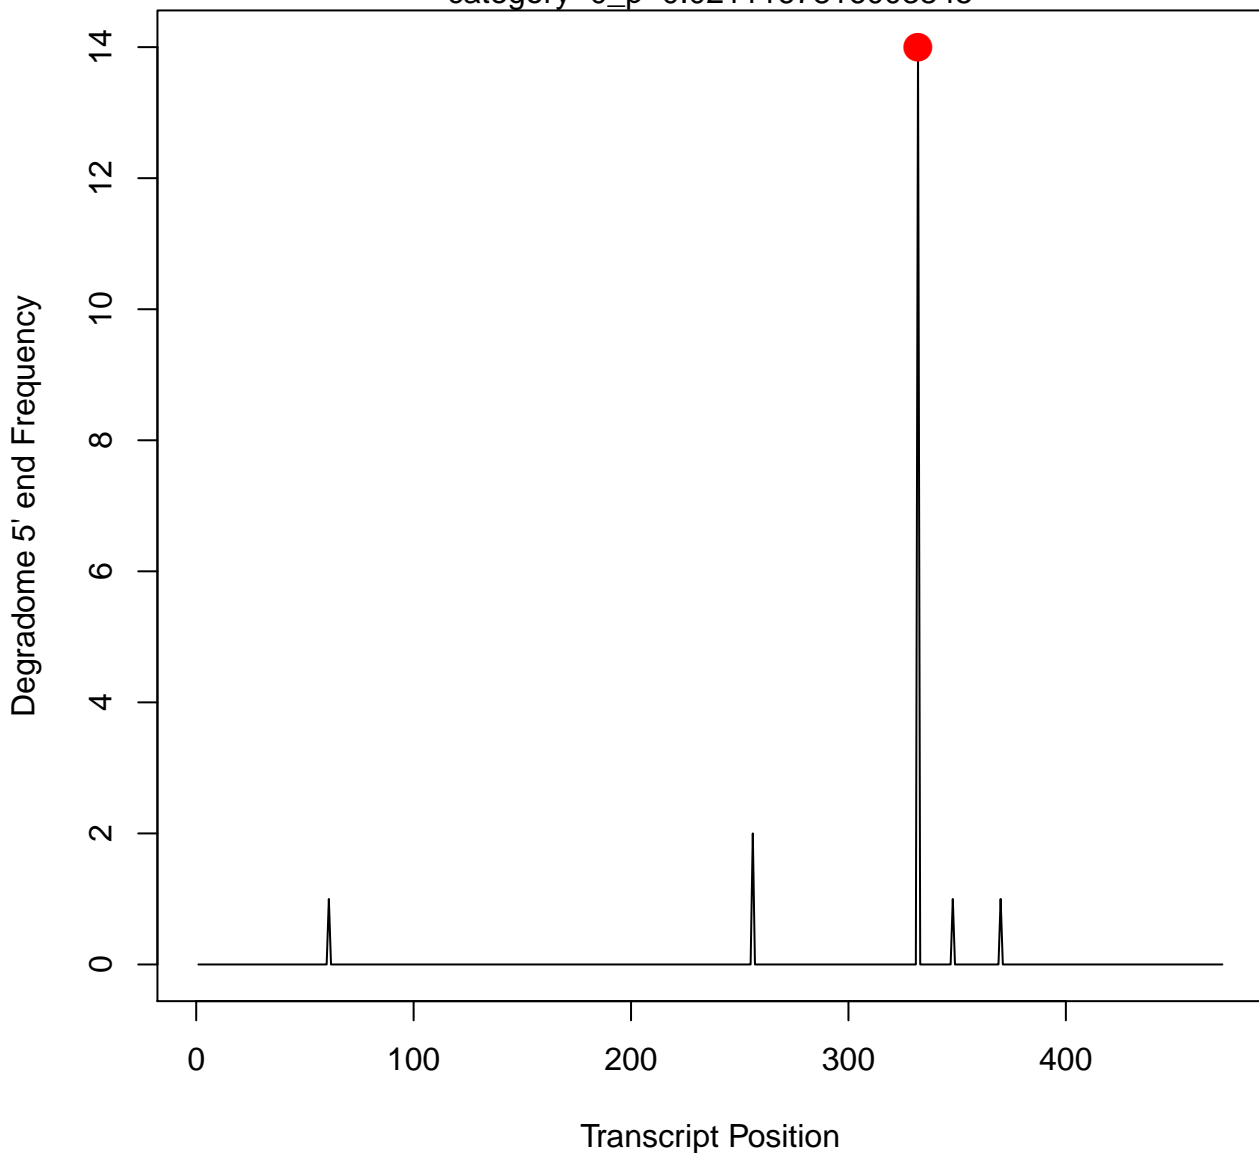

Supplement: s1 [file s1]

**T=Cluster-18410.48670\_Q=novel\_122\_S=130**

category=1\_p=0.0185433119647906

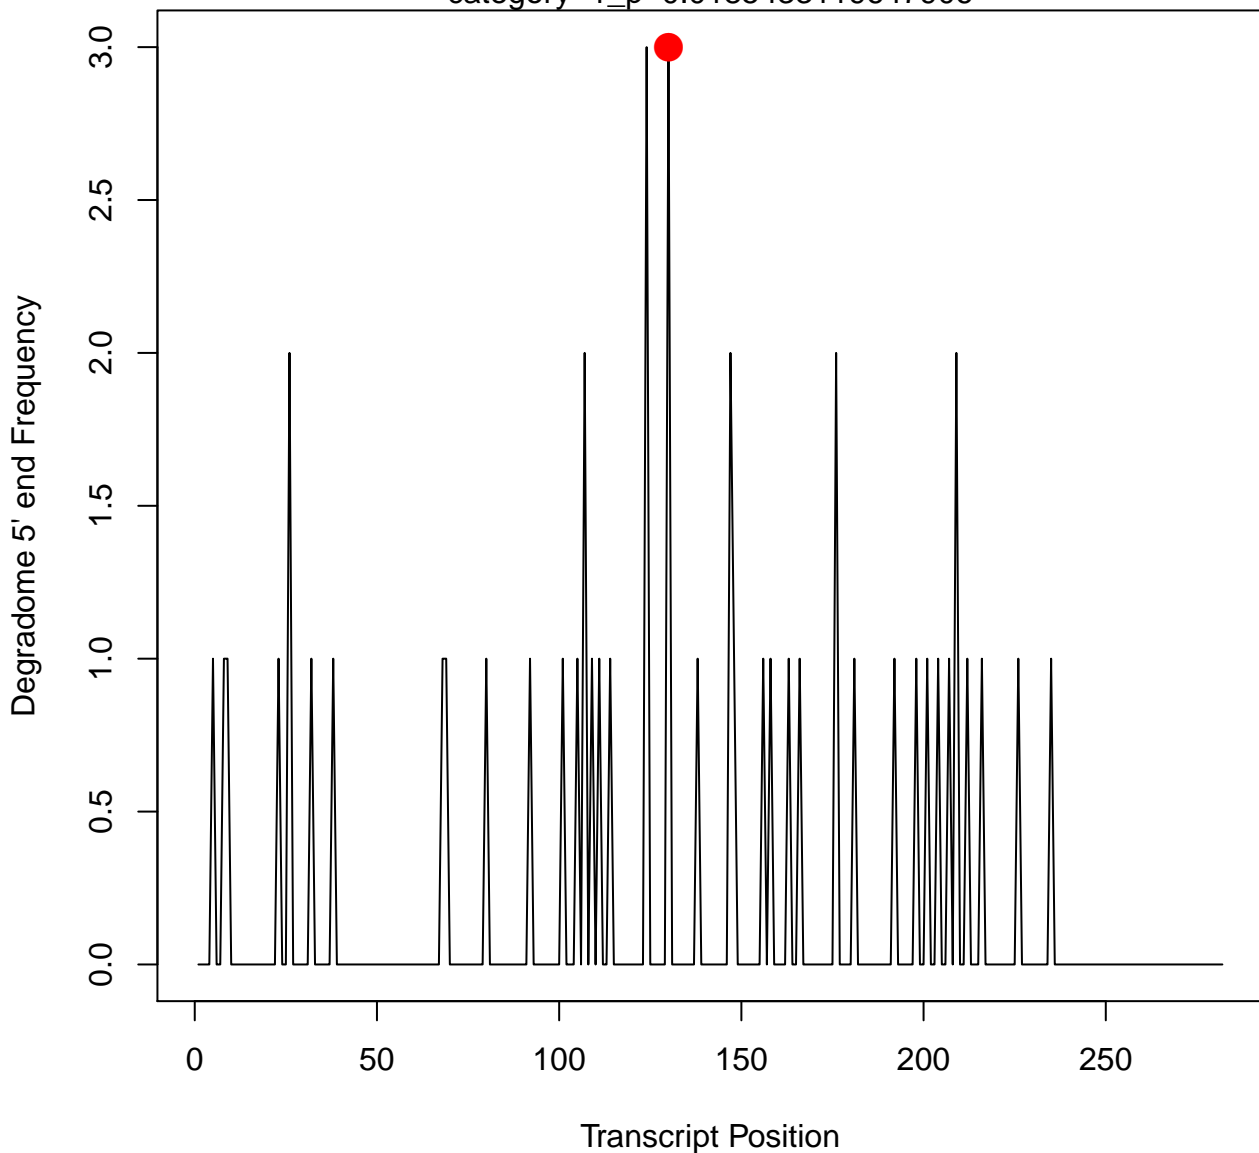

Supplement: s1 [file s1]

**T=Cluster-18410.65779\_Q=novel\_32\_S=925**

category=0\_p=0.00327814283922701

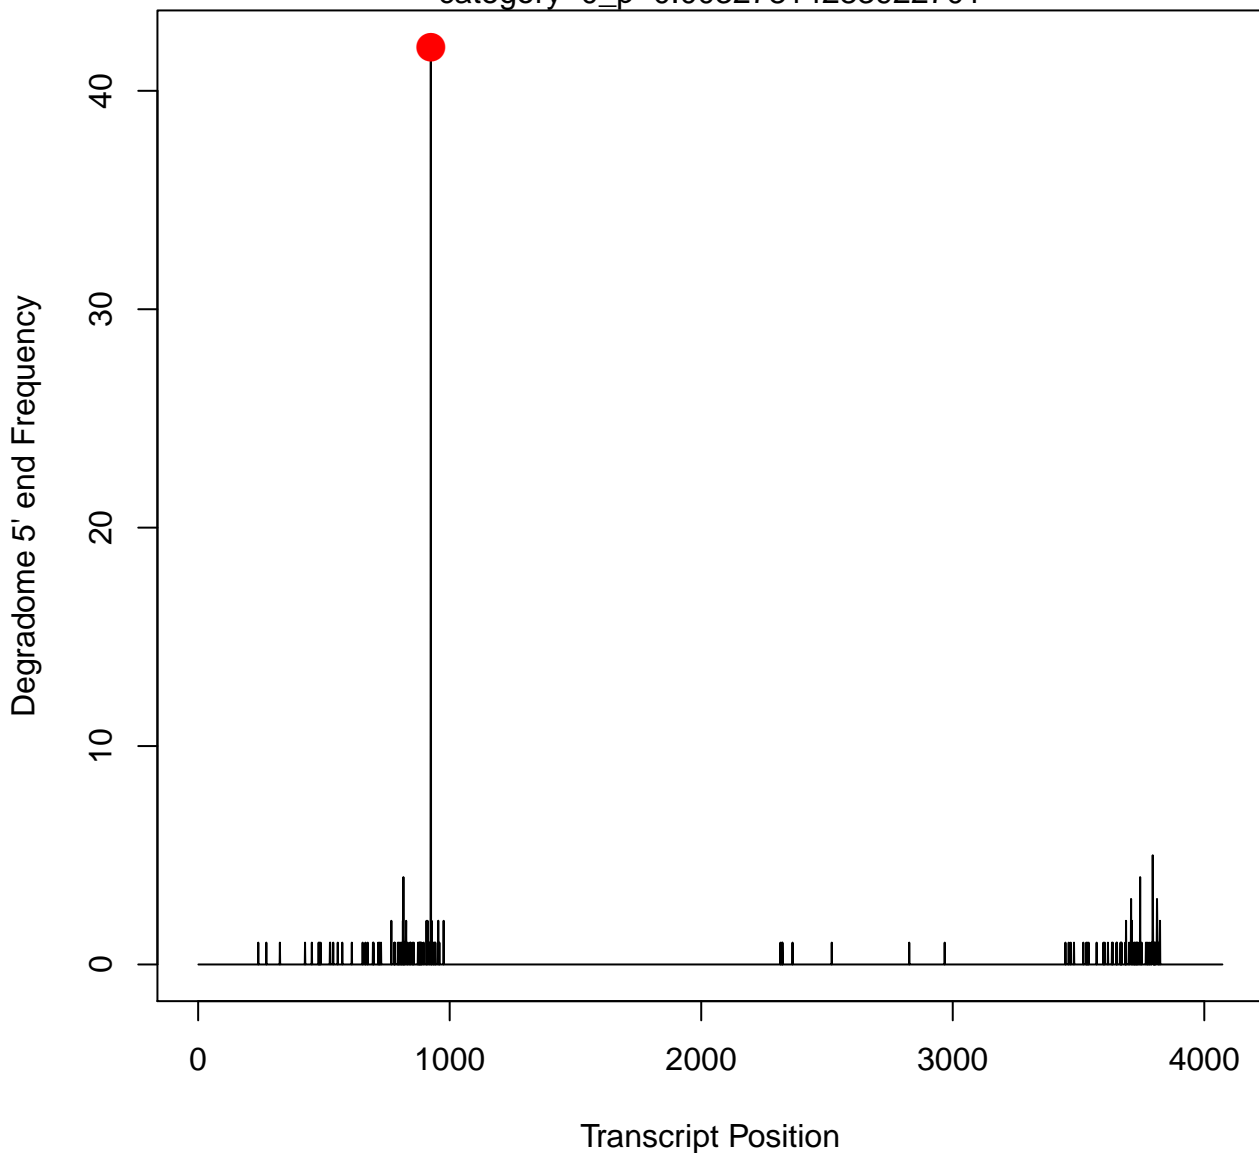

Supplement: s1 [file s1]

**T=Cluster-18410.78755\_Q=novel\_47\_S=67**

category=0\_p=0.0133182548417358

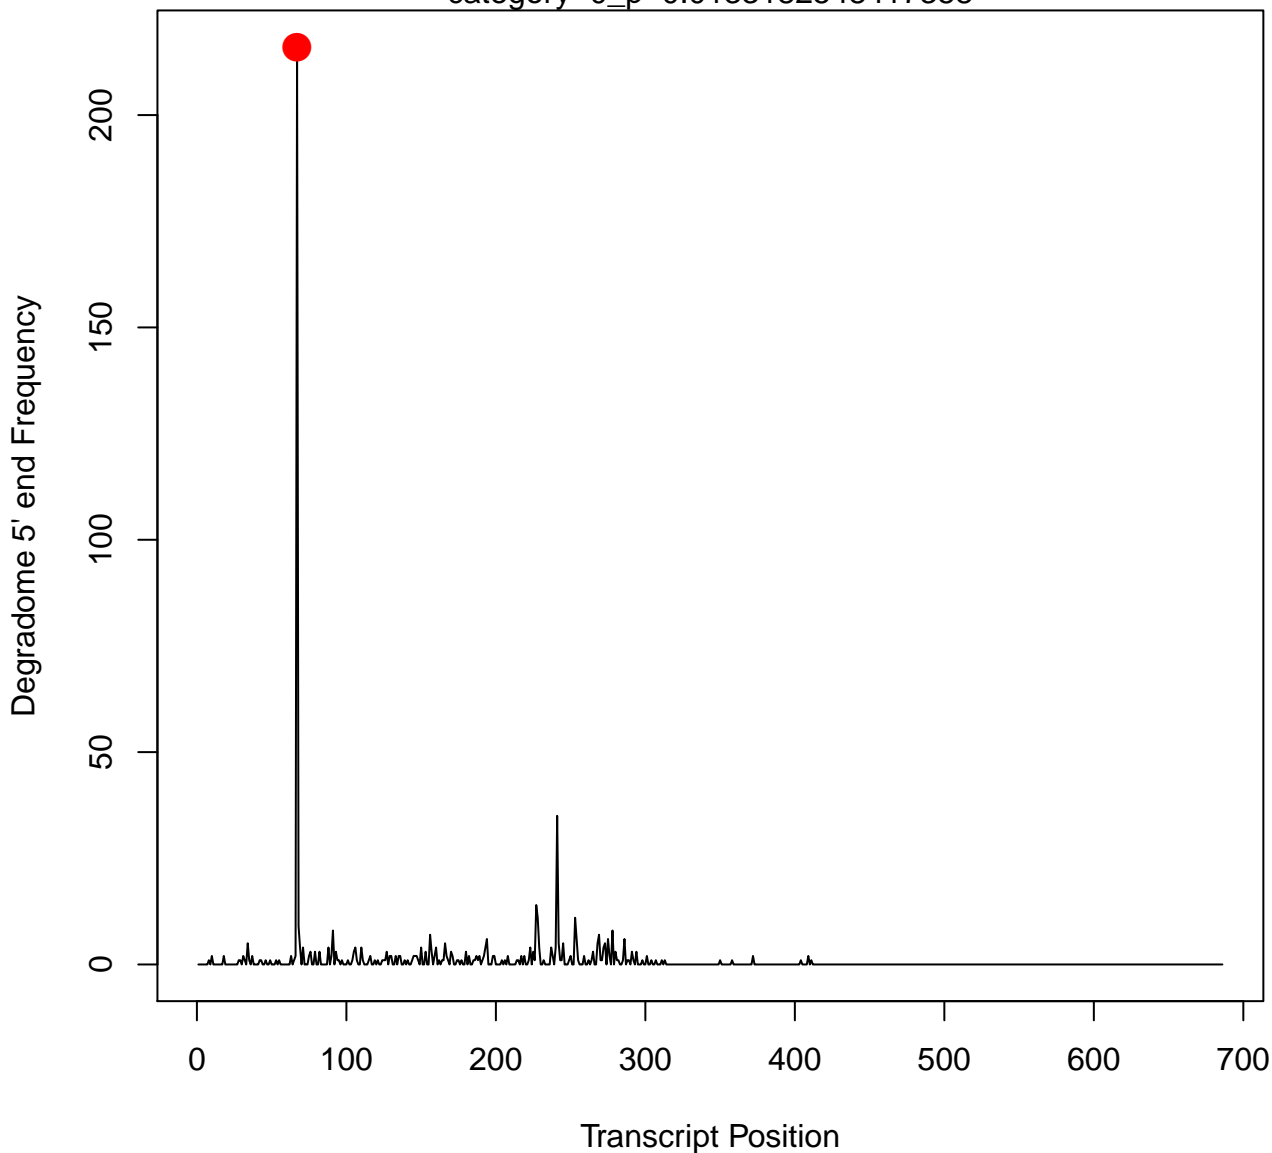

Supplement: s1 [file s1]

**T=Cluster-18410.90308\_Q=novel\_159\_S=755**

category=2\_p=0.0673240995462872

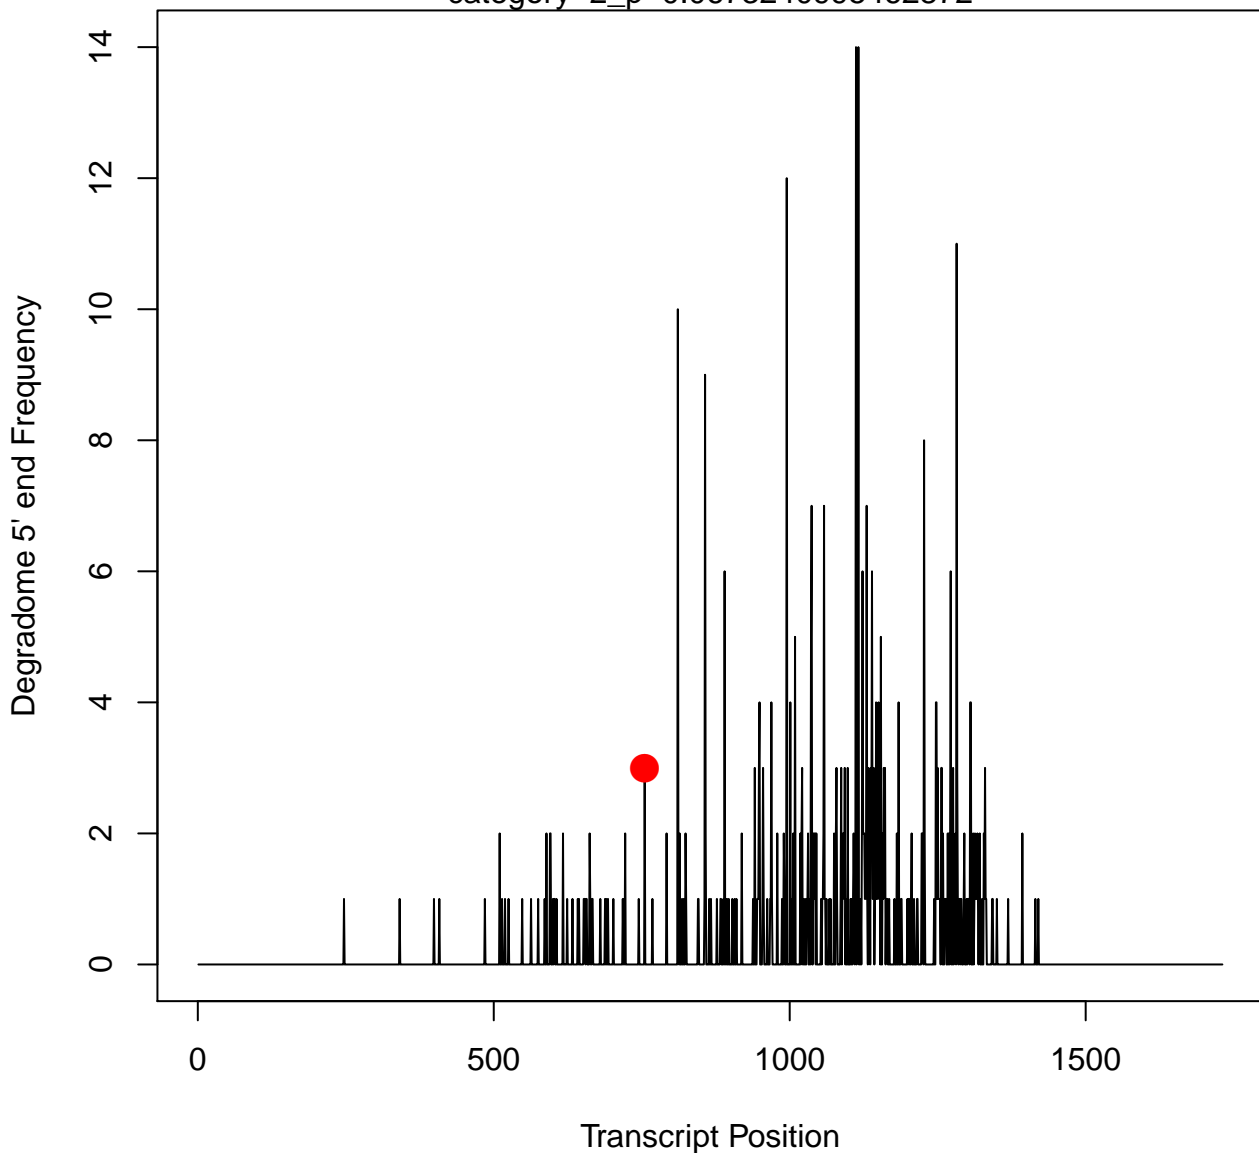

Supplement: s1 [file s1]

**T=Cluster-18410.39687\_Q=novel\_46\_S=655**

category=2\_p=0.0229647072699788

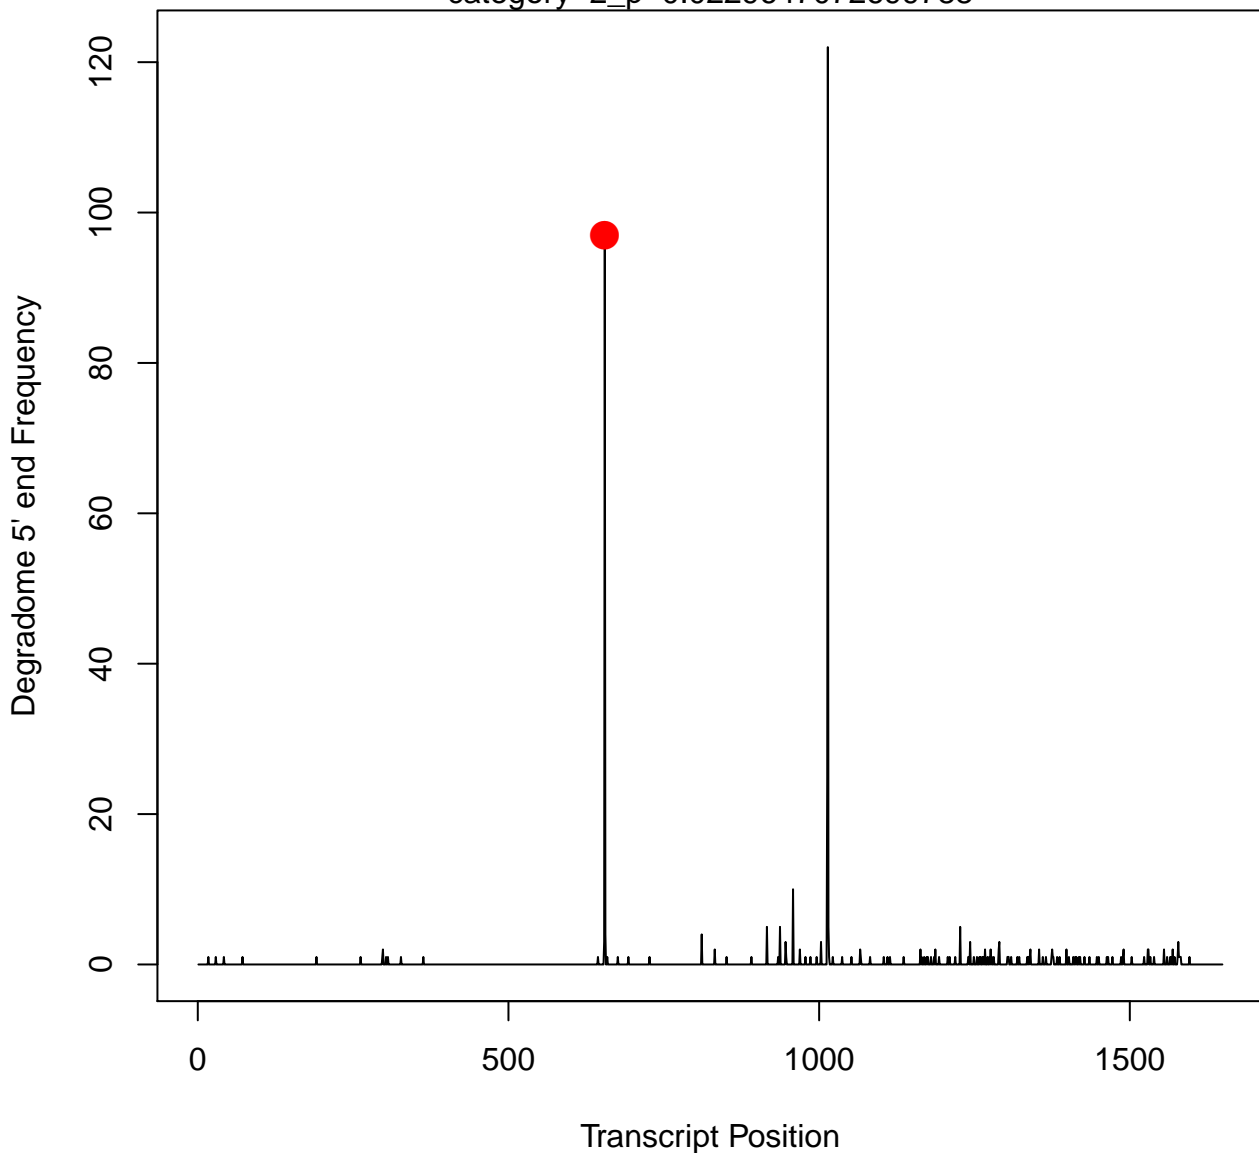

Supplement: s1 [file s1]

**T=Cluster-18410.27403\_Q=novel\_109\_S=207**

category=2\_p=0.0342485307007228

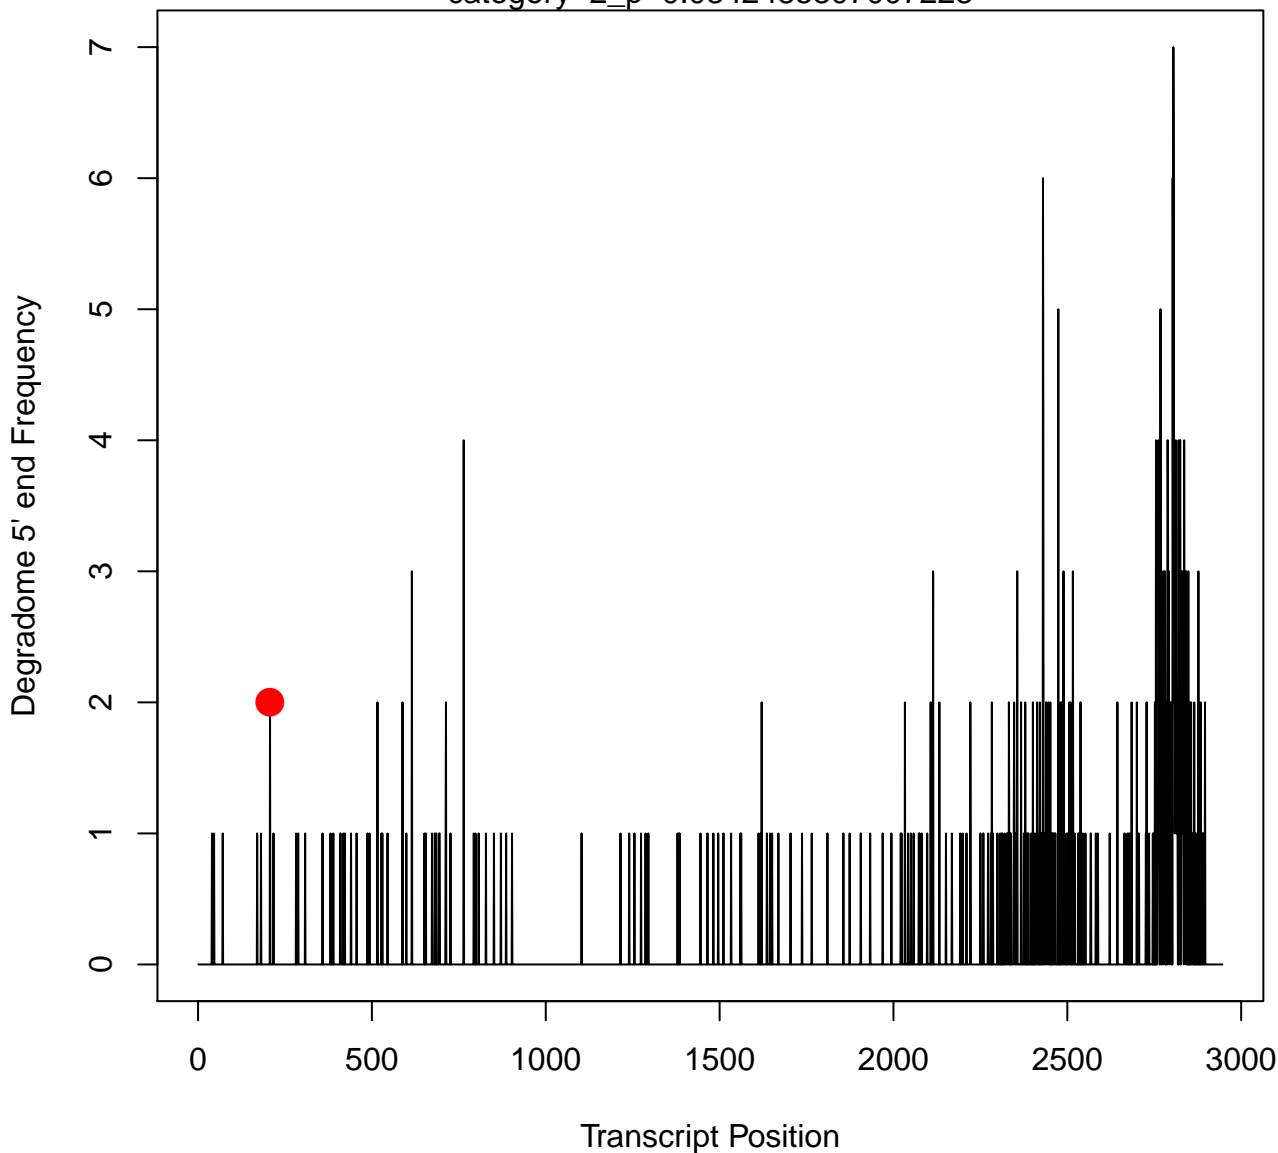

Supplement: s1 [file s1]

**T=Cluster-18410.58111\_Q=novel\_95\_S=69**

category=0\_p=0.00027358987754178

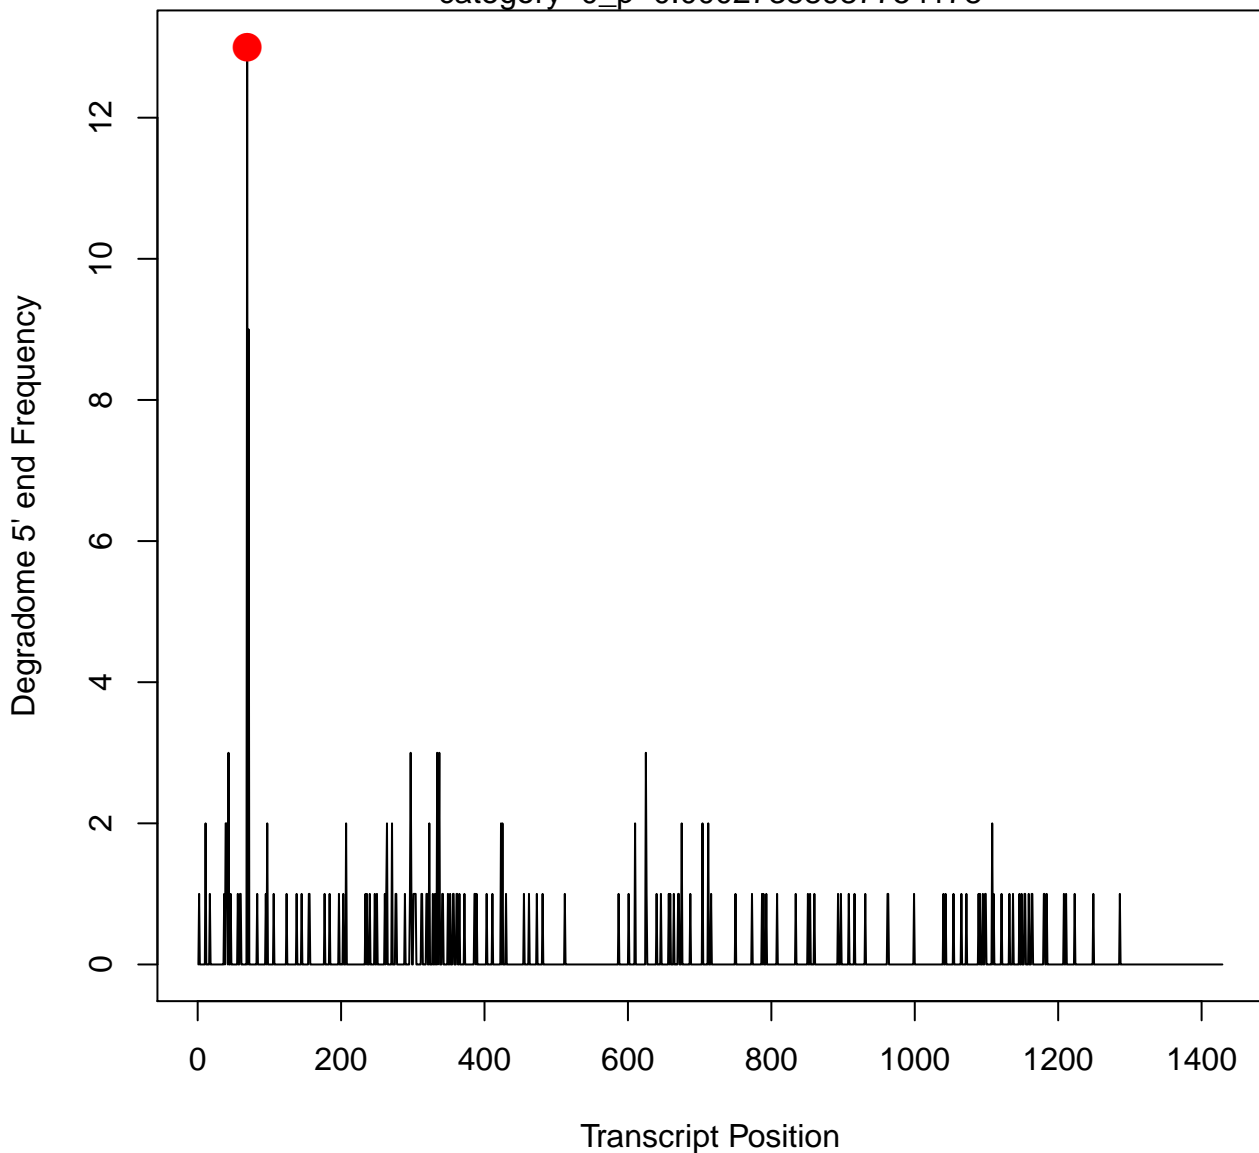

Supplement: s1 [file s1]

**T=Cluster-18410.68763\_Q=pma-miR949\_S=127**

category=0\_p=0.00898905591083365

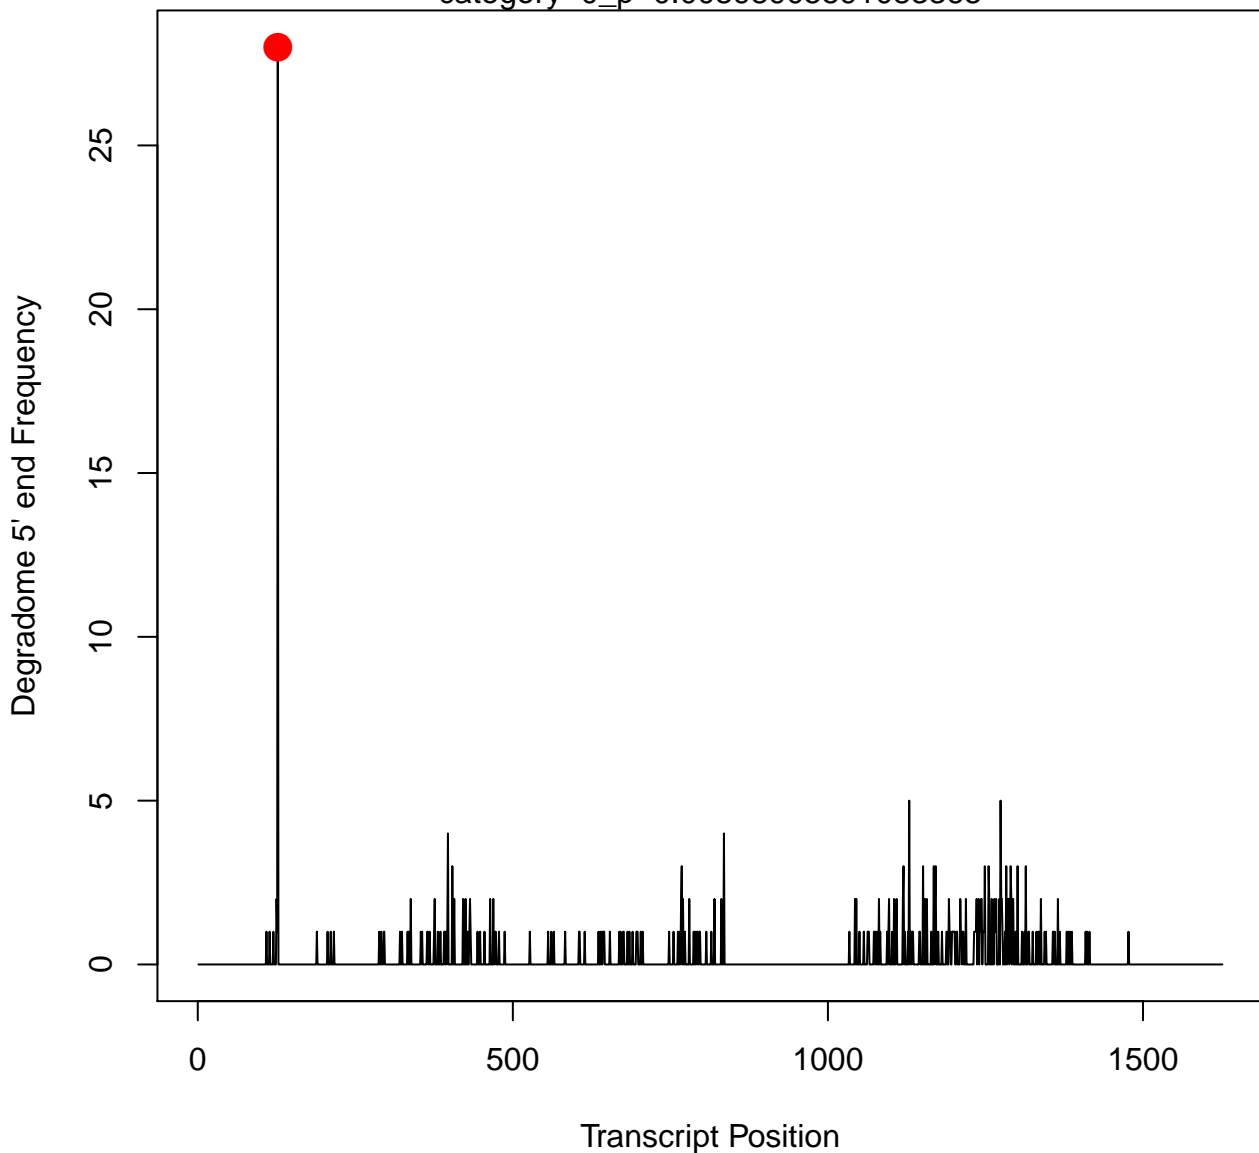

Supplement: s1 [file s1]

**T=Cluster-18410.19527\_Q=novel\_168\_S=2182**

category=0\_p=0.0820802844876299

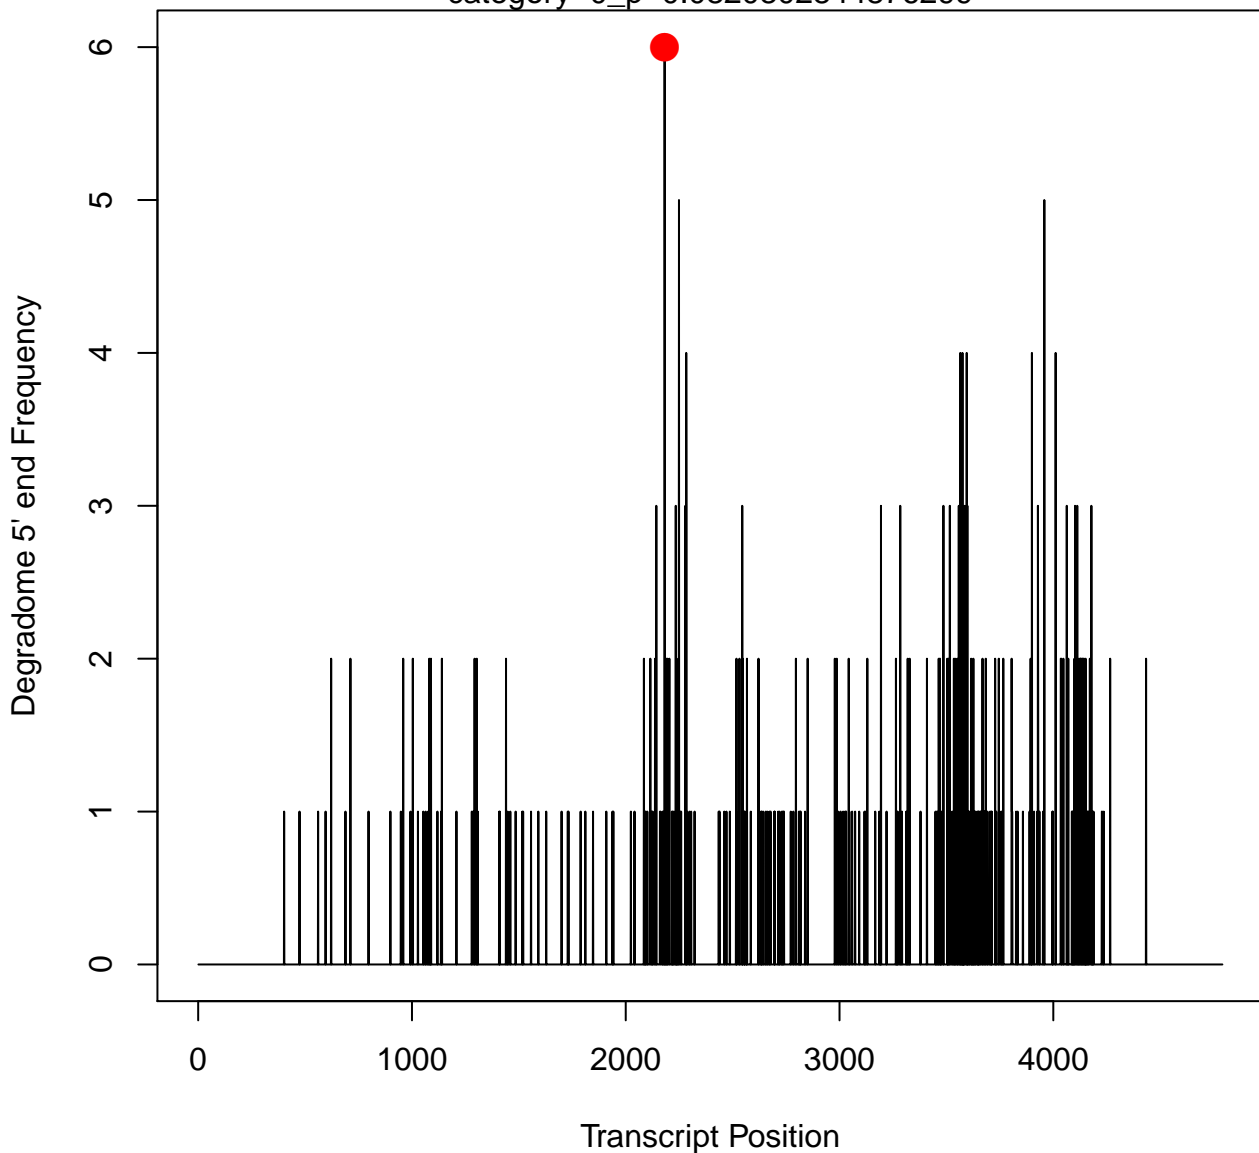

Supplement: s1 [file s1]

**T=Cluster-18410.35467\_Q=novel\_201\_S=588**

category=1\_p=0.025863997771997

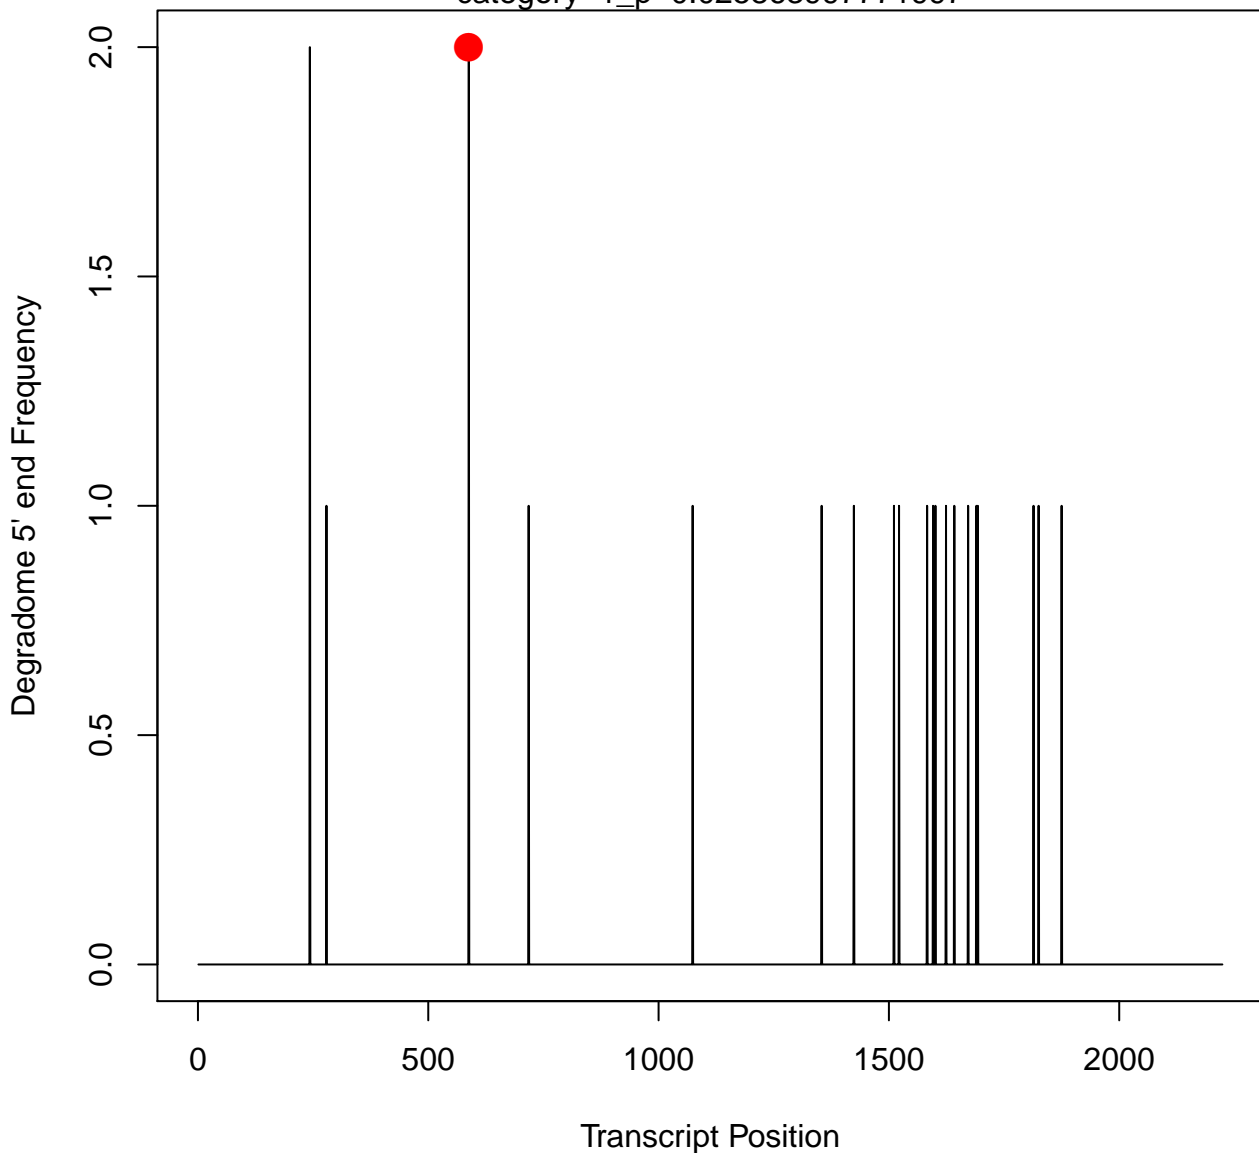

Supplement: s1 [file s1]

**T=Cluster-18410.105917\_Q=novel\_20\_S=1619**

category=1\_p=0.0136323161298242

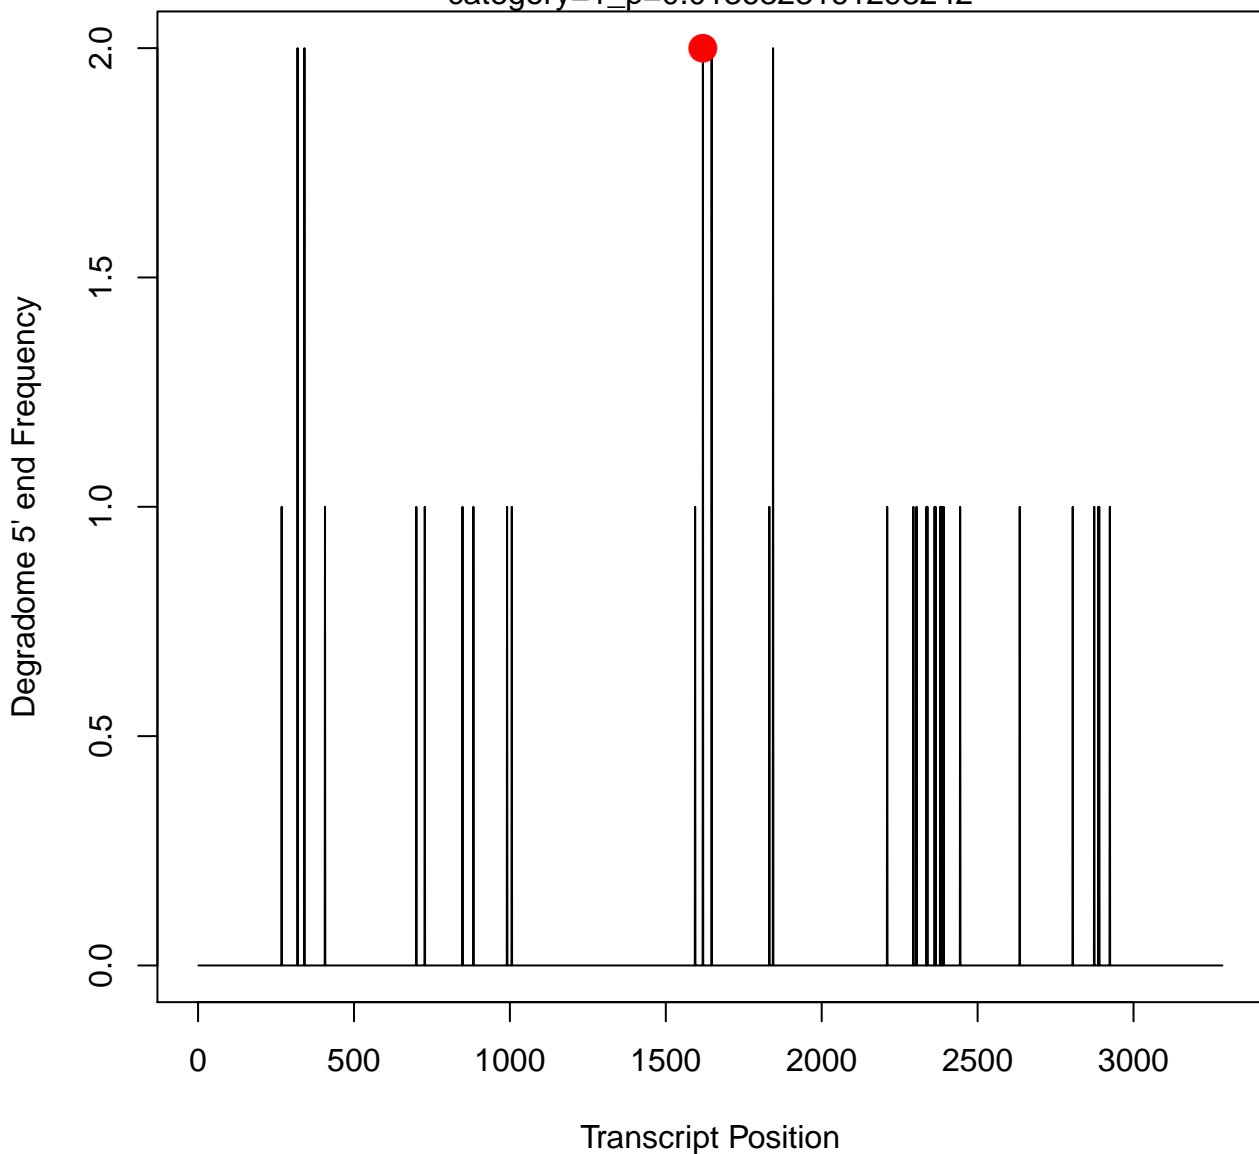

Supplement: s1 [file s1]

**T=Cluster-18410.38800\_Q=novel\_20\_S=477**

category=0\_p=0.00327814283922701

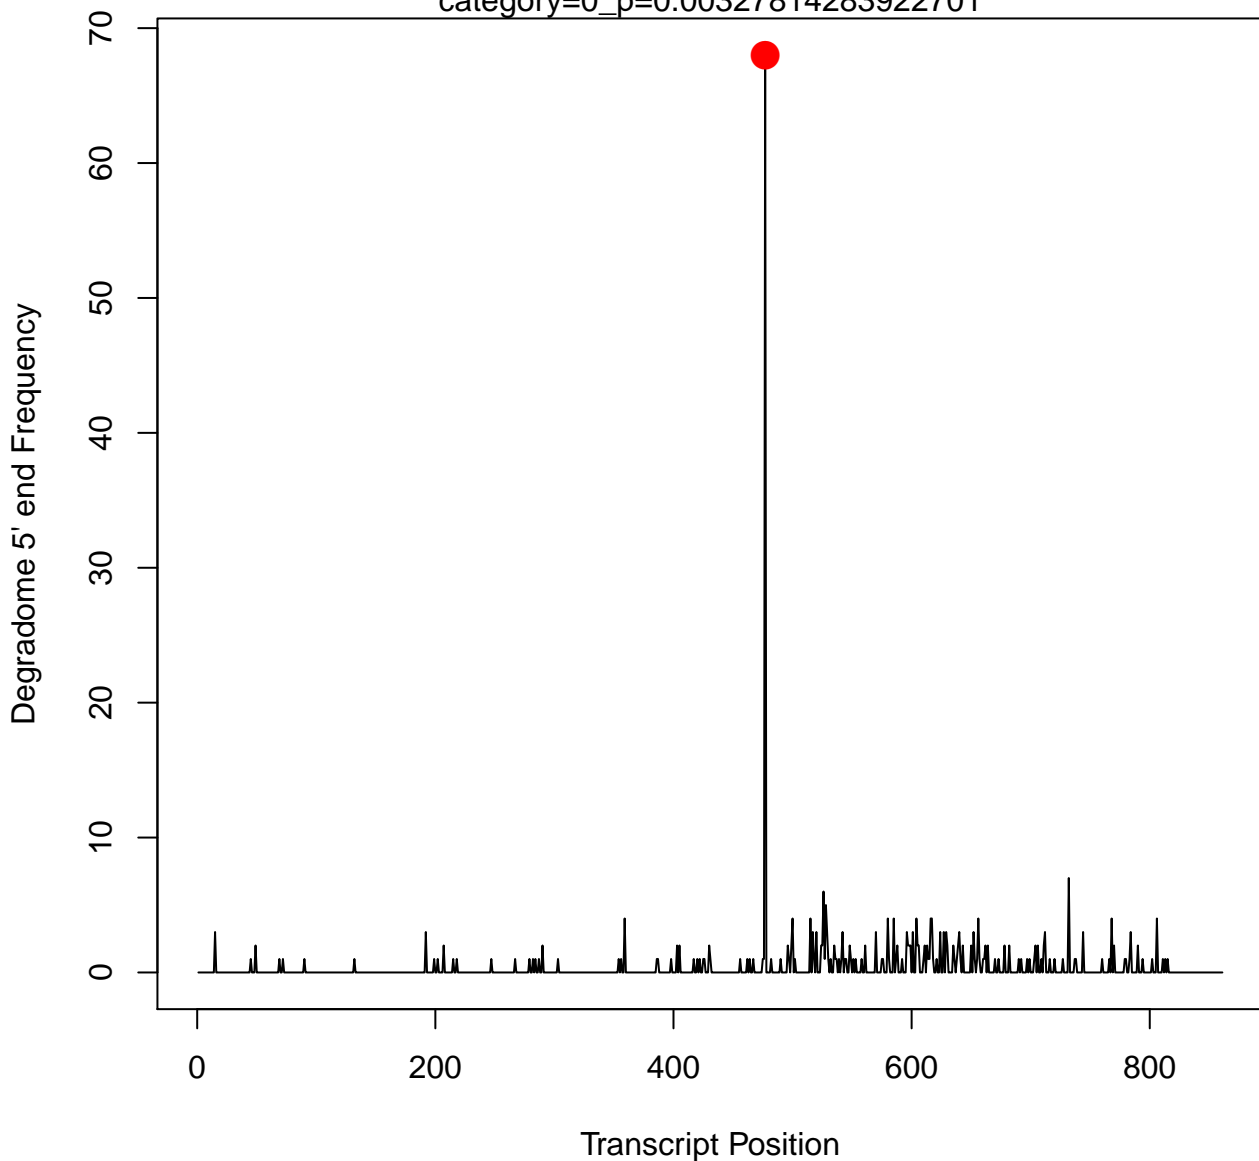

Supplement: s1 [file s1]

**T=Cluster-18410.87650\_Q=novel\_8\_S=471**

category=3\_p=0.0781921676015778

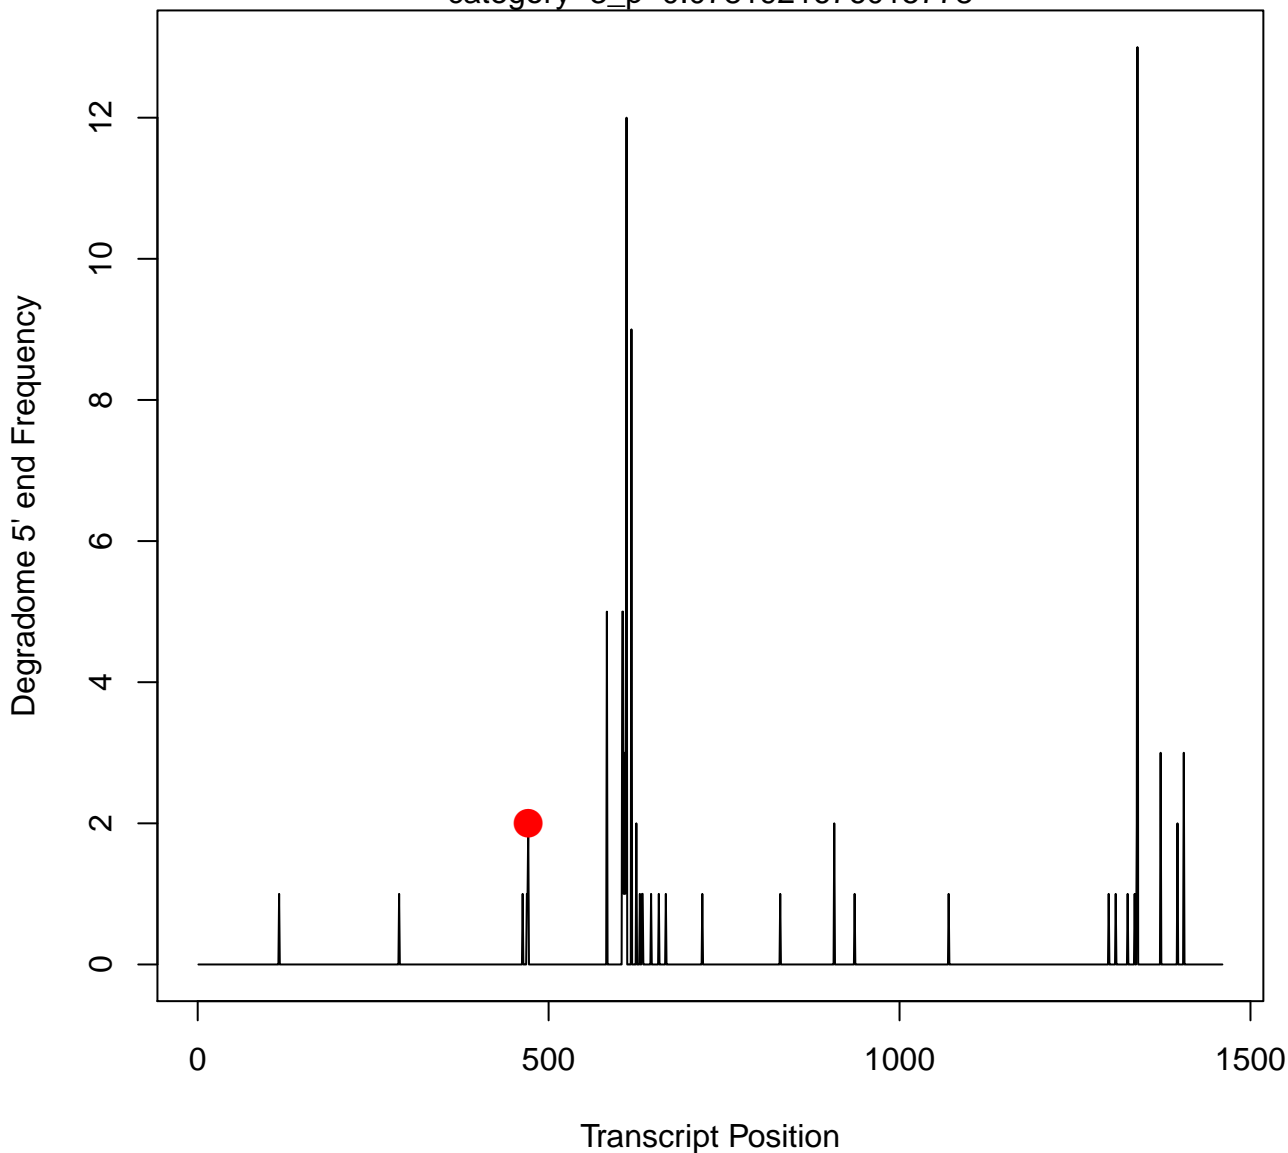

Supplement: s1 [file s1]

**T=Cluster-2325.1\_Q=novel\_2\_S=74**

category=0\_p=0.00980222508390338

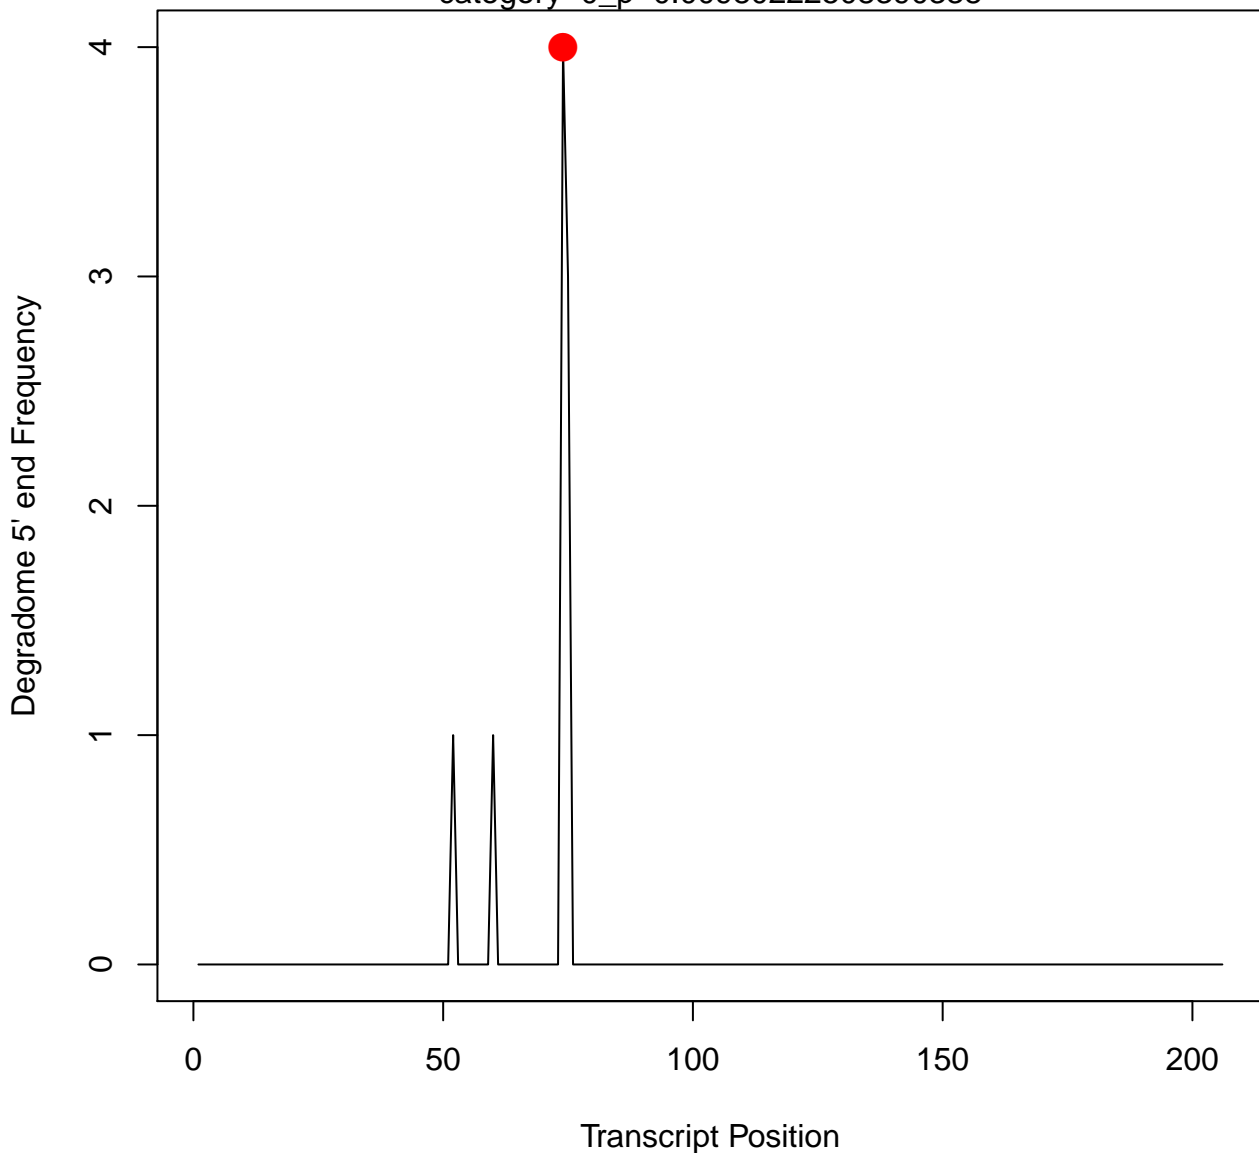

Supplement: s1 [file s1]

**T=Cluster-12424.0\_Q=novel\_9\_S=341**

category=2\_p=0.0342485307007228

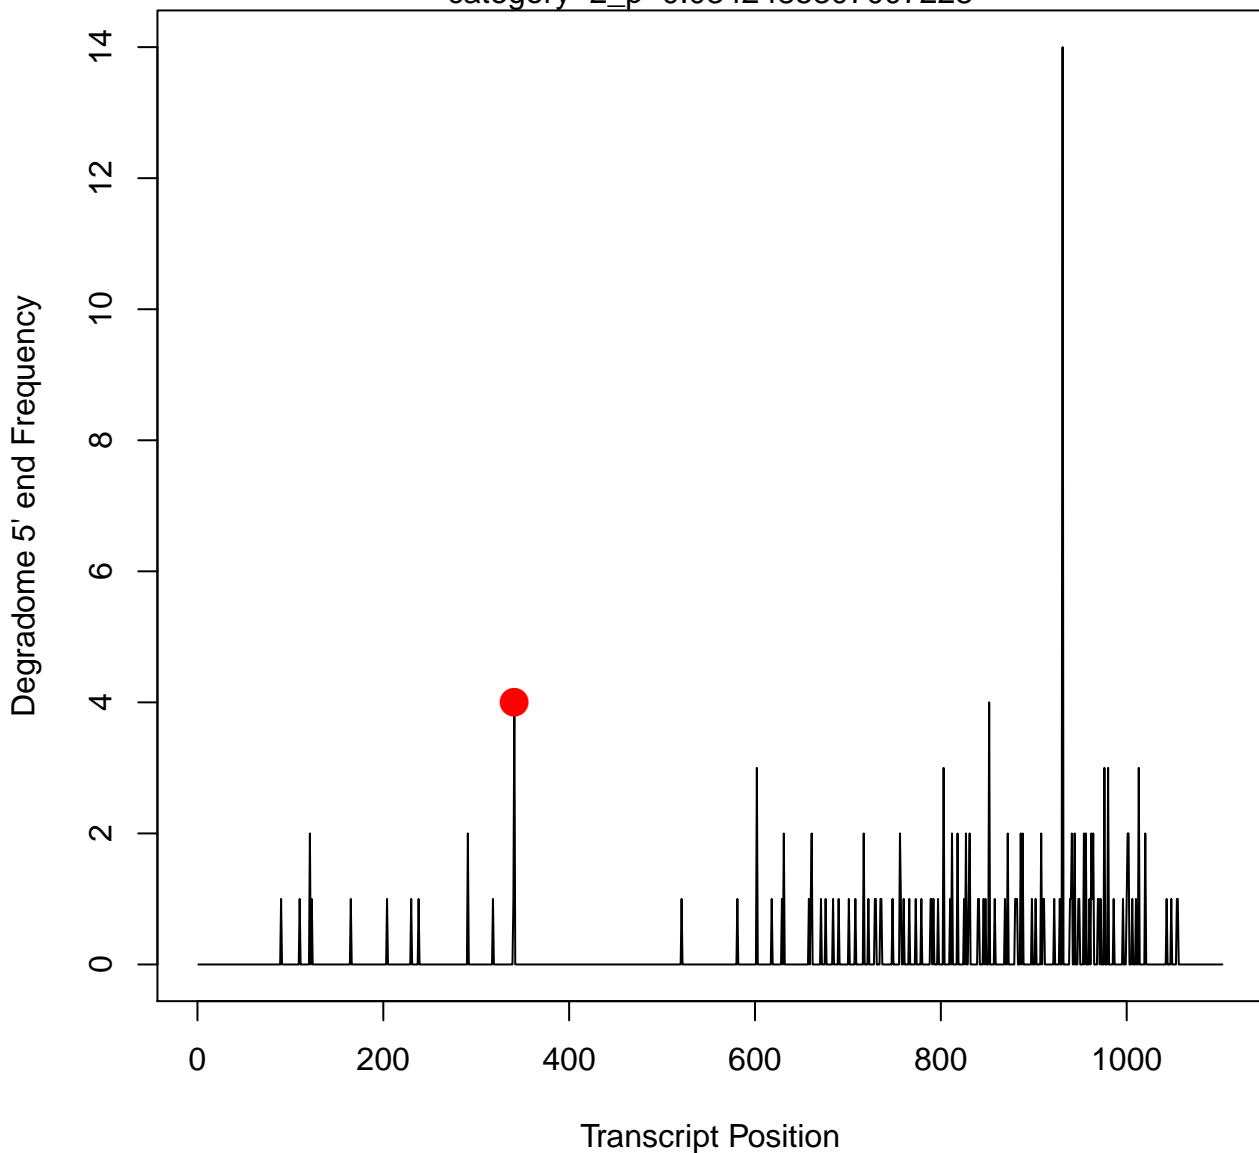

Supplement: s1 [file s1]

**T=Cluster-18410.66767\_Q=novel\_47\_S=345**

category=0\_p=0.00136720107825572

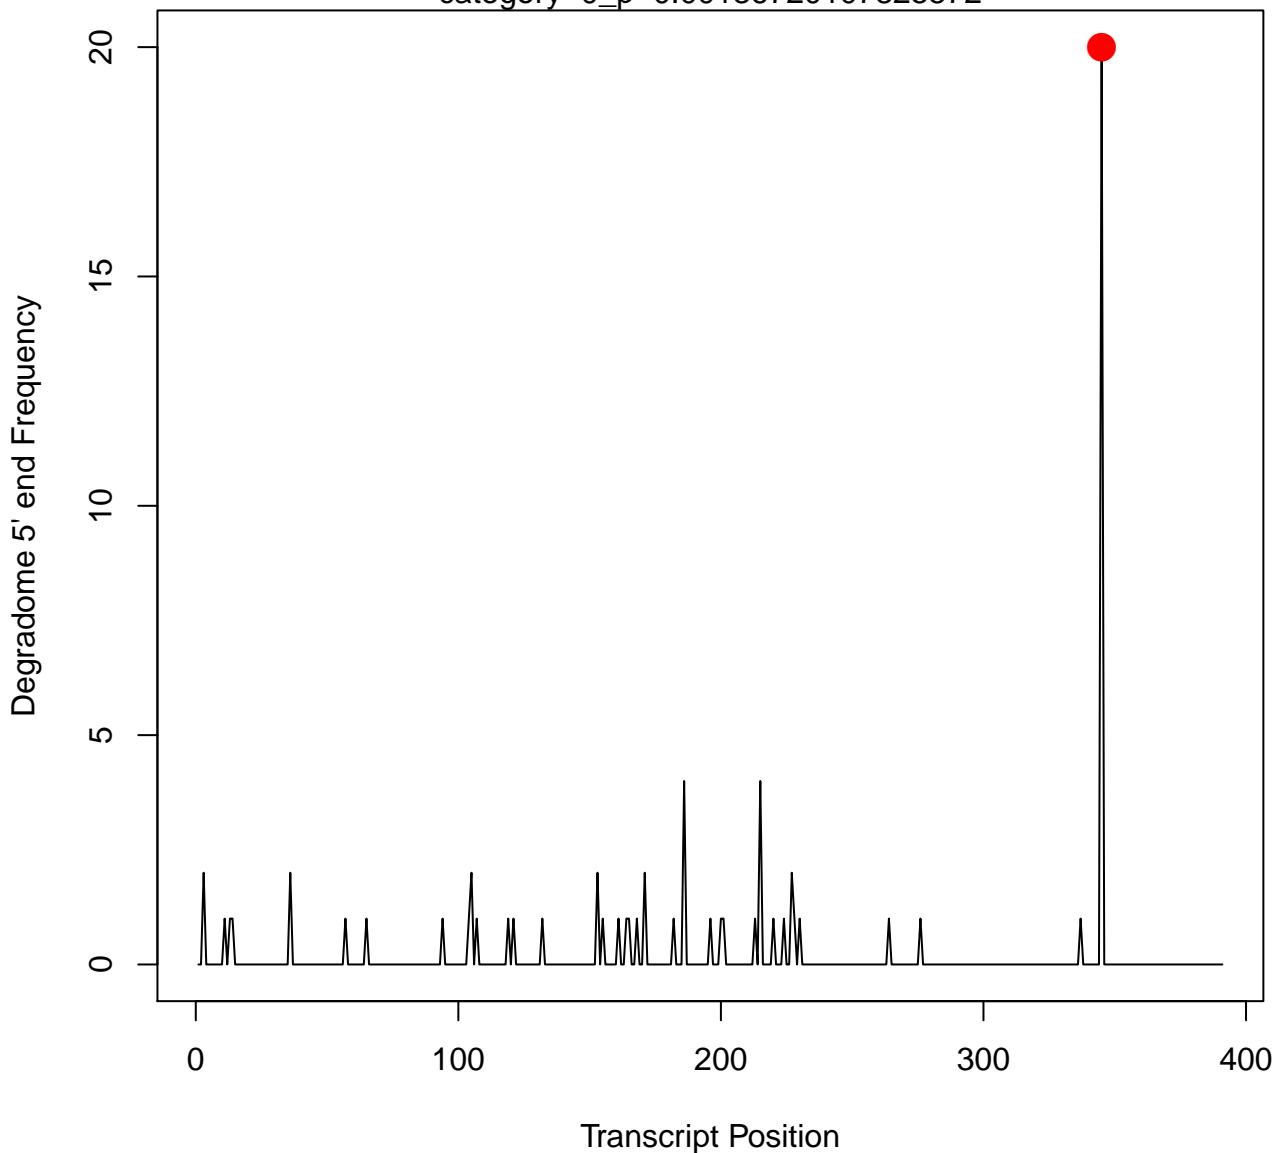

Supplement: s1 [file s1]
