# Supplementary figures and images for: Uncovering miRNA-mRNA Regulatory Modules in Developing Xylem of Pinus massoniana via Small RNA and Degradome Sequencing (part 6 of 9)
Source: MDPI journal article supplement (doi:10.3390/ijms221810154), 2021-09-21

**T=Cluster-18410.98259\_Q=novel\_15\_S=278**

category=0\_p=0.000547104903662499

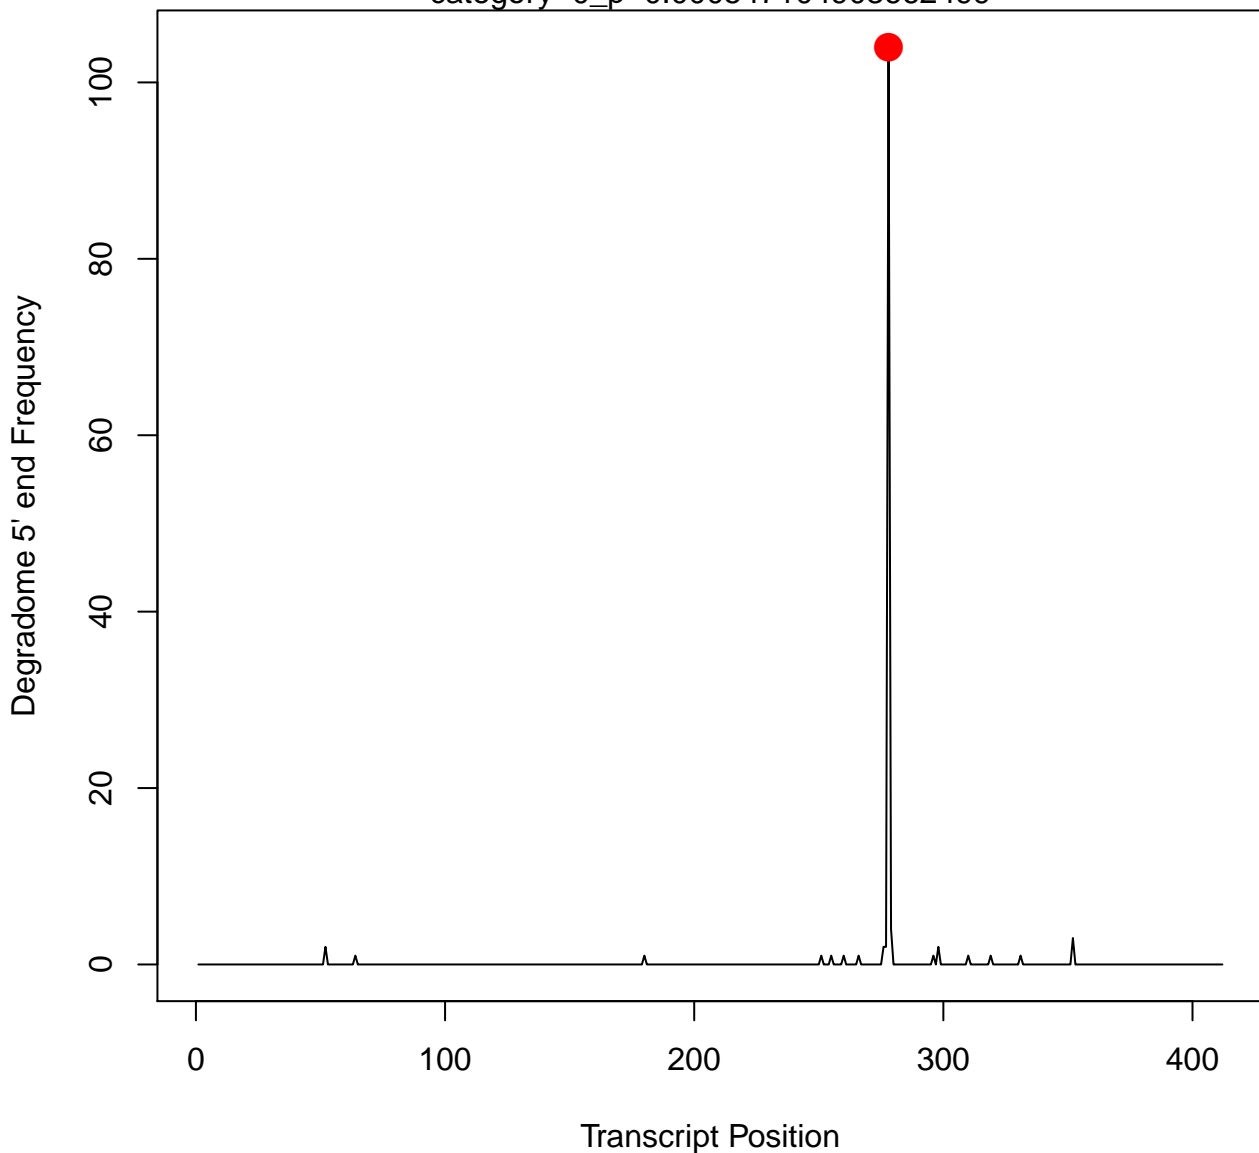

Supplement: s1 [file s1]

**T=Cluster-18410.88725\_Q=novel\_6\_S=242**

category=3\_p=0.0424939132250566

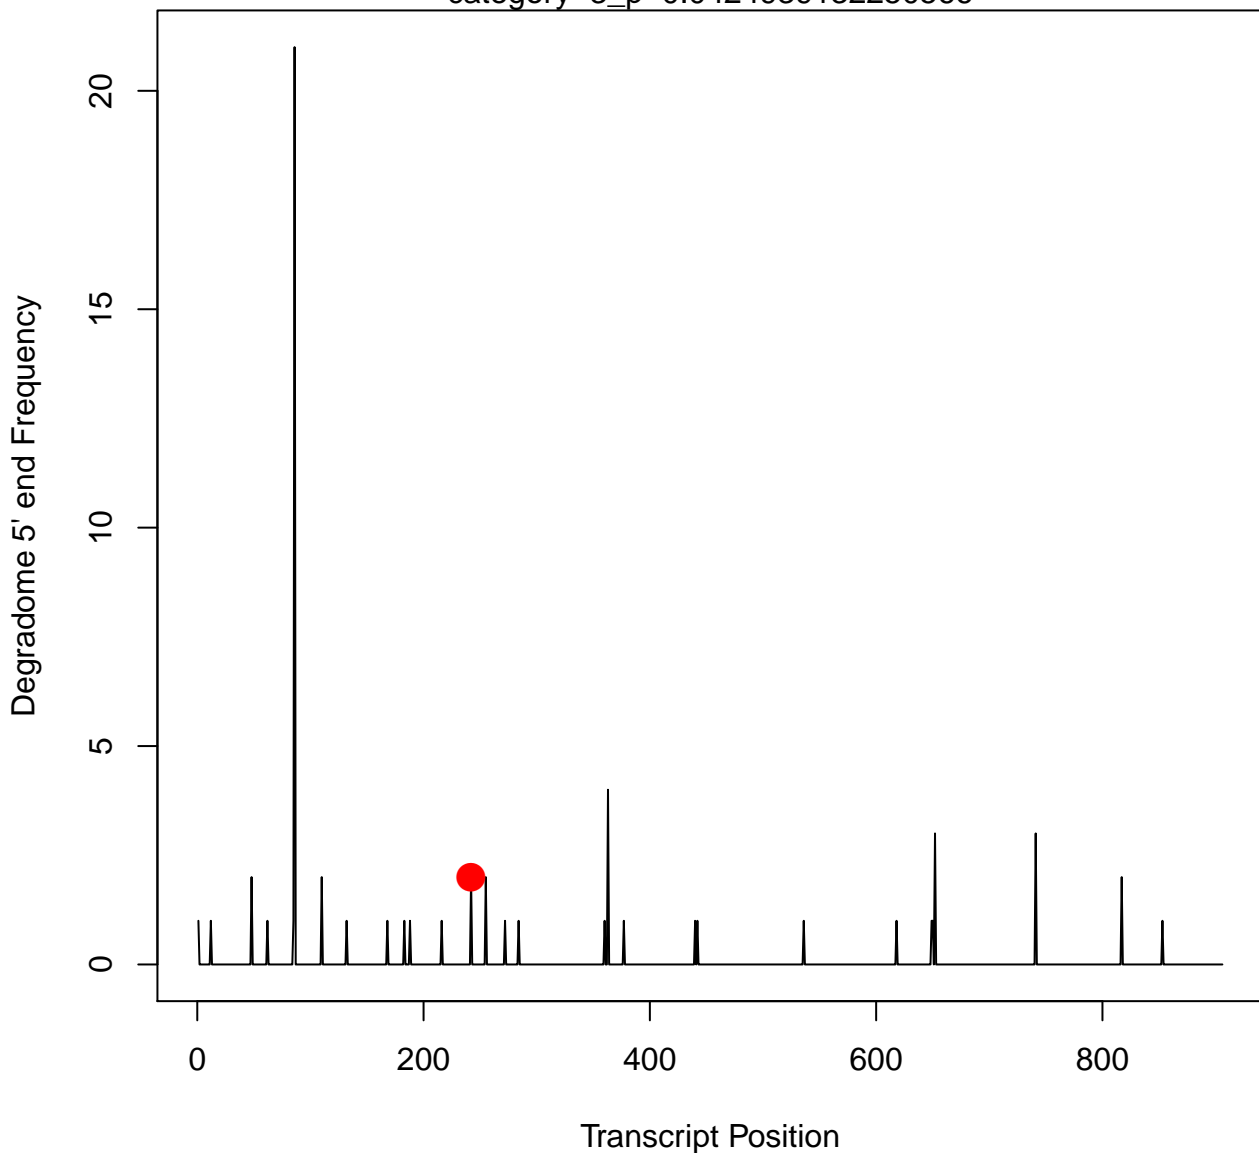

Supplement: s1 [file s1]

**T=Cluster-18410.35927\_Q=pma-miR951\_S=372**

category=0\_p=0.00218662432695249

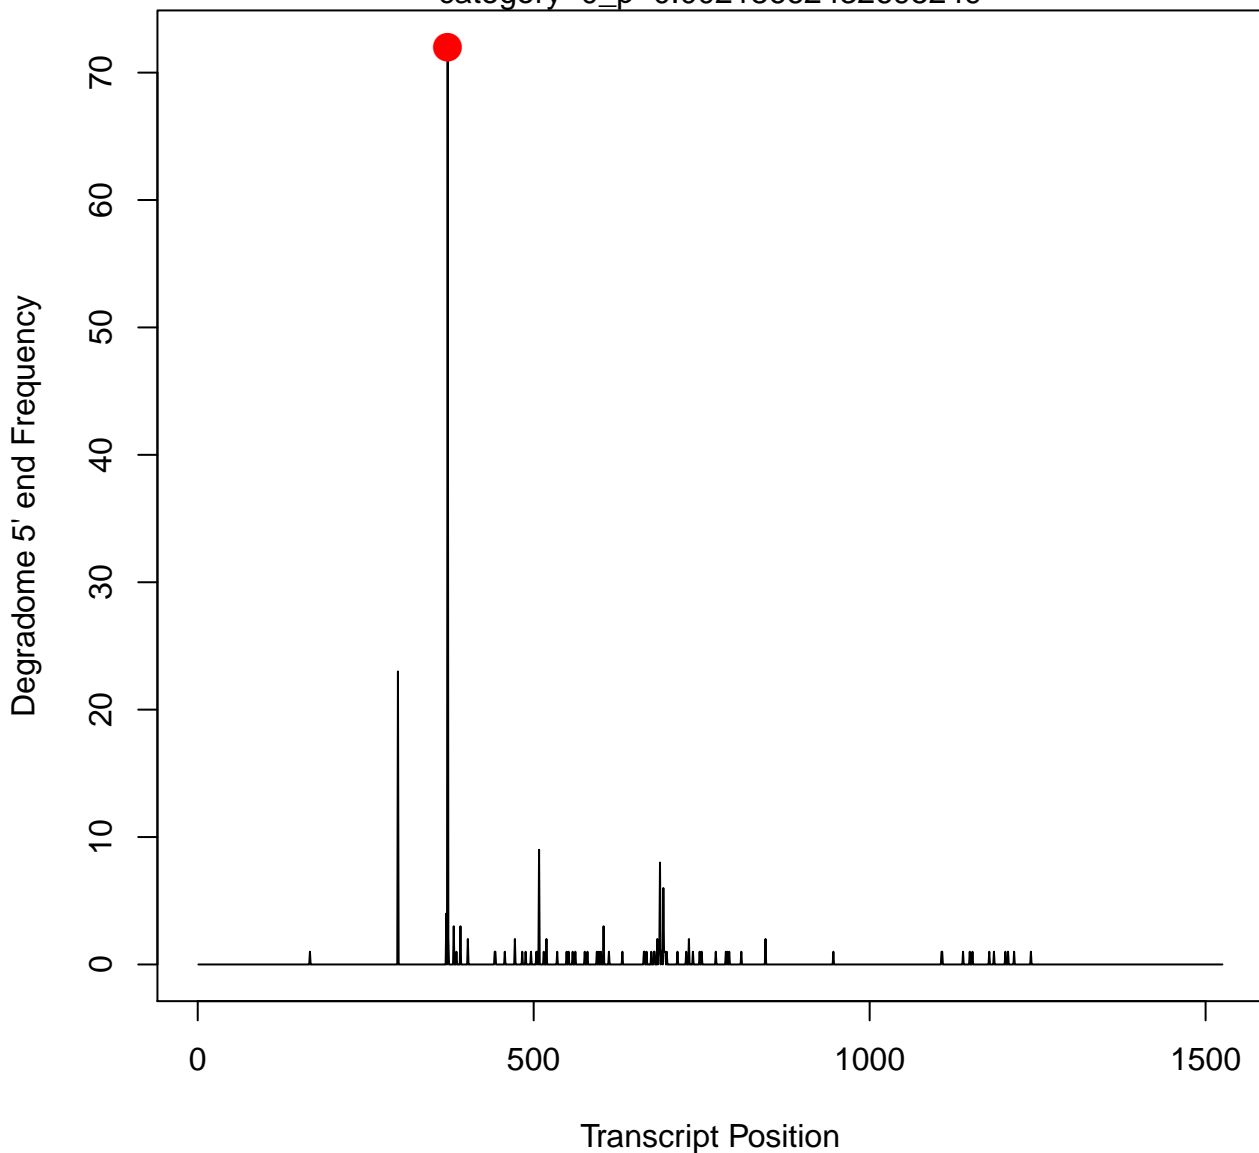

Supplement: s1 [file s1]

**T=Cluster-18410.23606\_Q=novel\_38\_S=131**

category=3\_p=0.0161518376349161

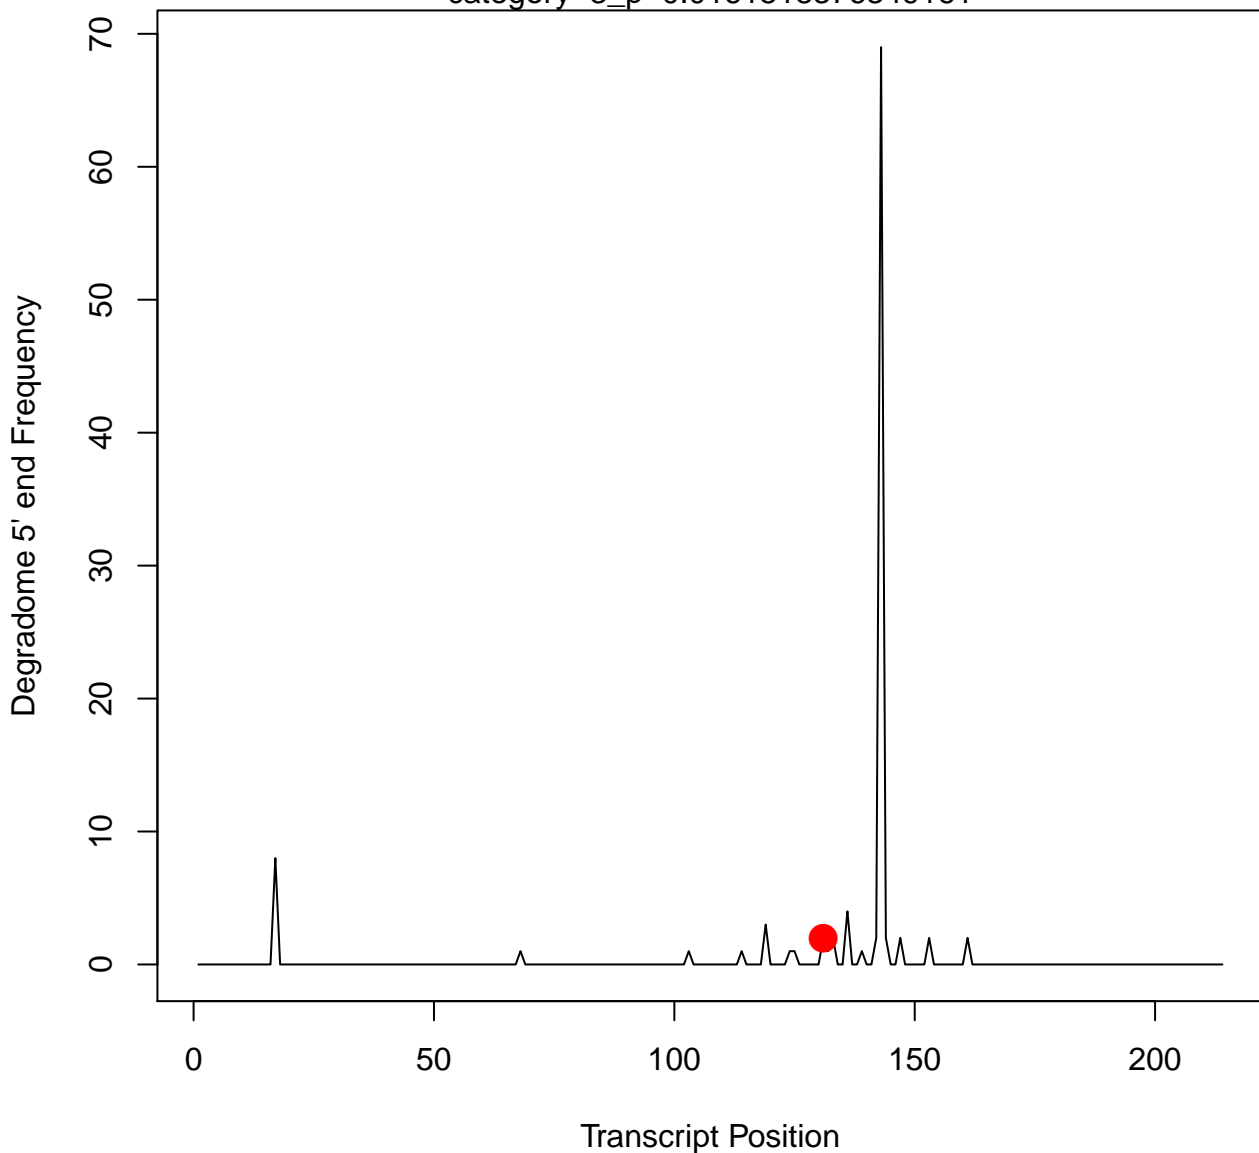

Supplement: s1 [file s1]

**T=Cluster-1841.0\_Q=pma-miR1312\_S=895**

category=4\_p=0.0942809831727407

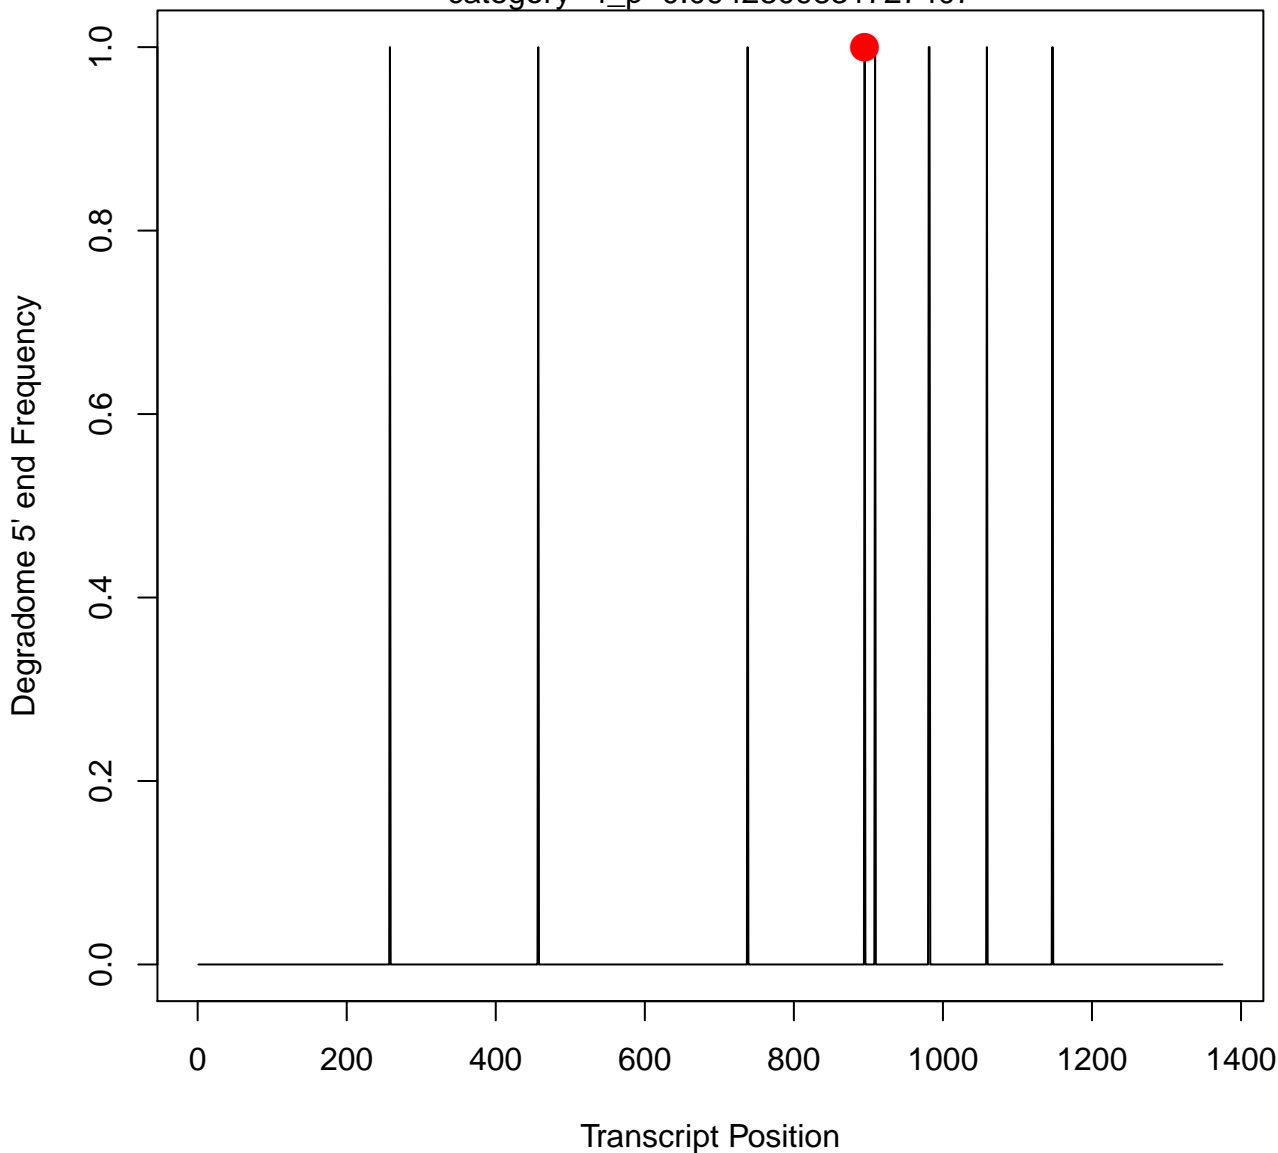

Supplement: s1 [file s1]

**T=Cluster-18410.15938\_Q=novel\_47\_S=156**

category=0\_p=0.0127781409216312

Degradome 5' end Frequency

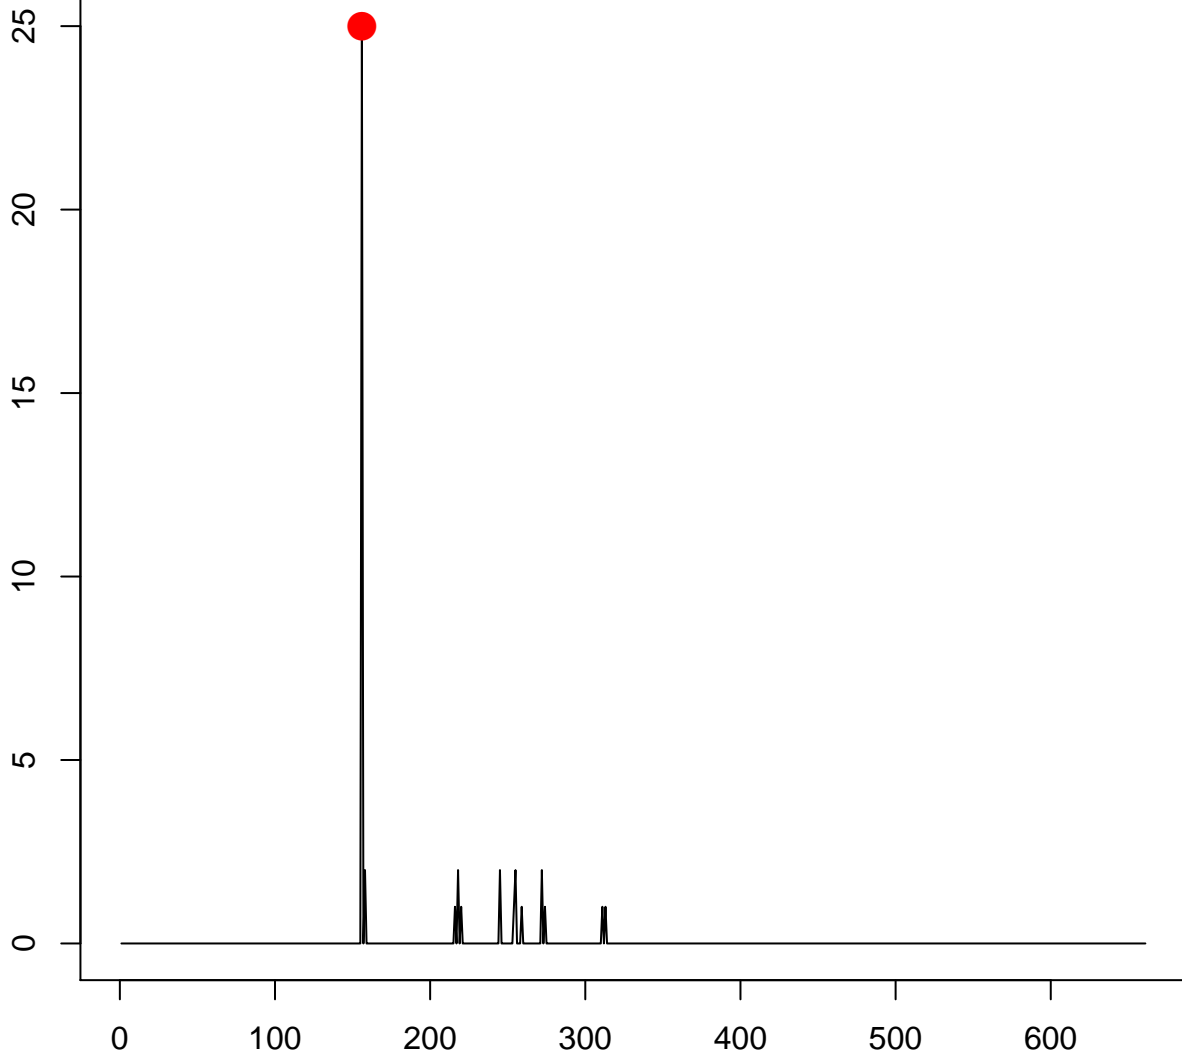

Transcript Position

Supplement: s1 [file s1]

**T=Cluster-18410.106870\_Q=novel\_80\_S=468**

category=0\_p=0.0256596435673687

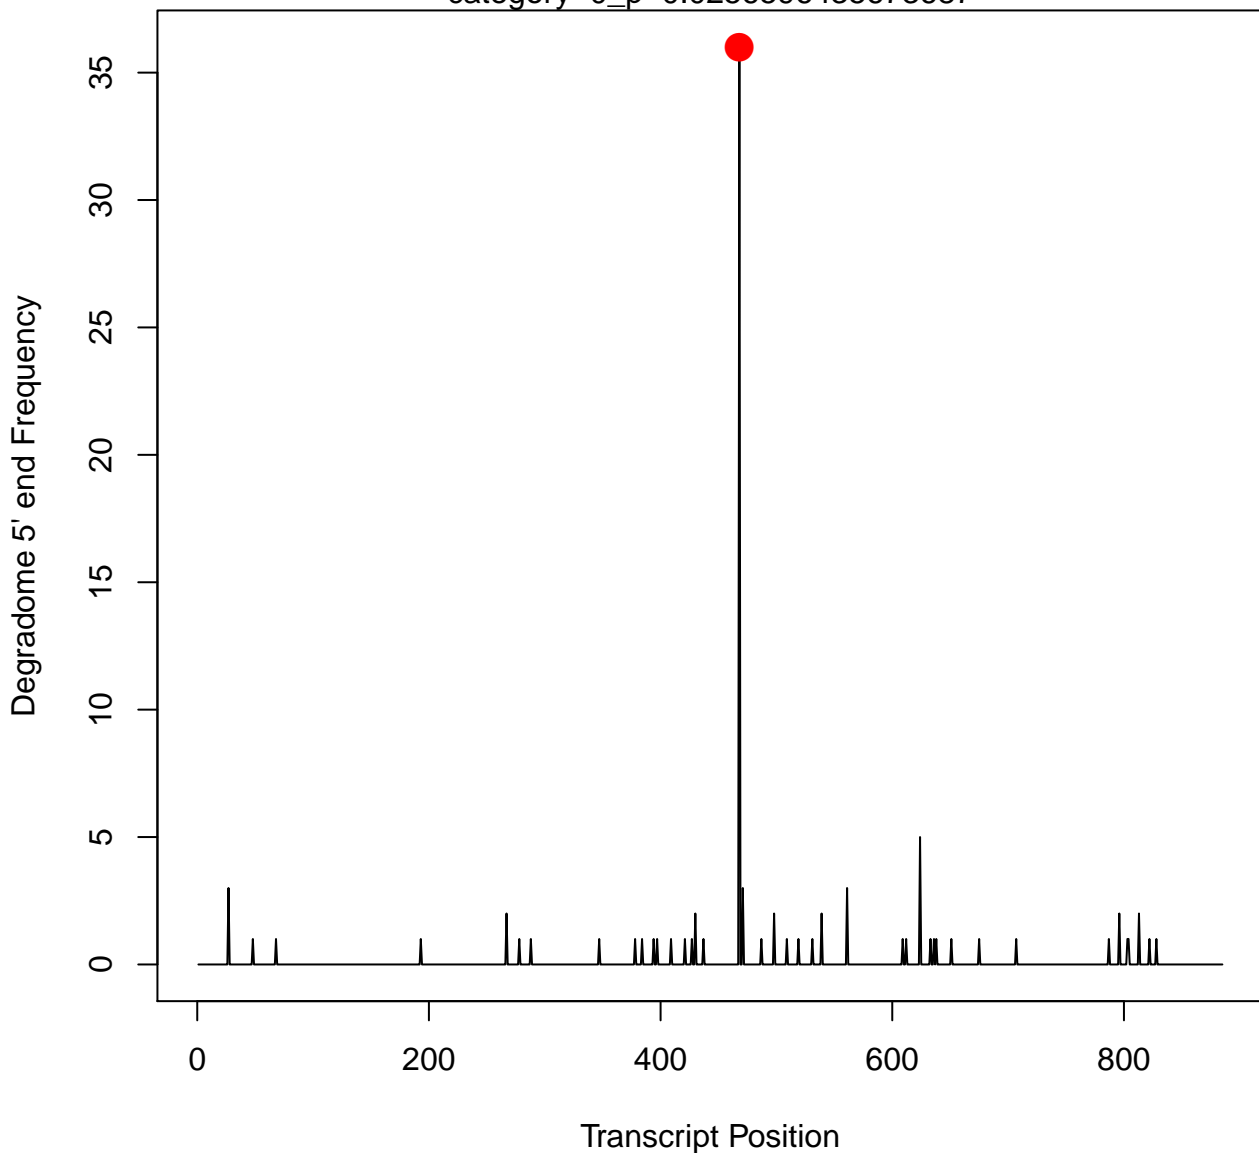

Supplement: s1 [file s1]

**T=Cluster-18410.8091\_Q=pma-miR1316\_S=2795**

category=0\_p=0.00136720107825572

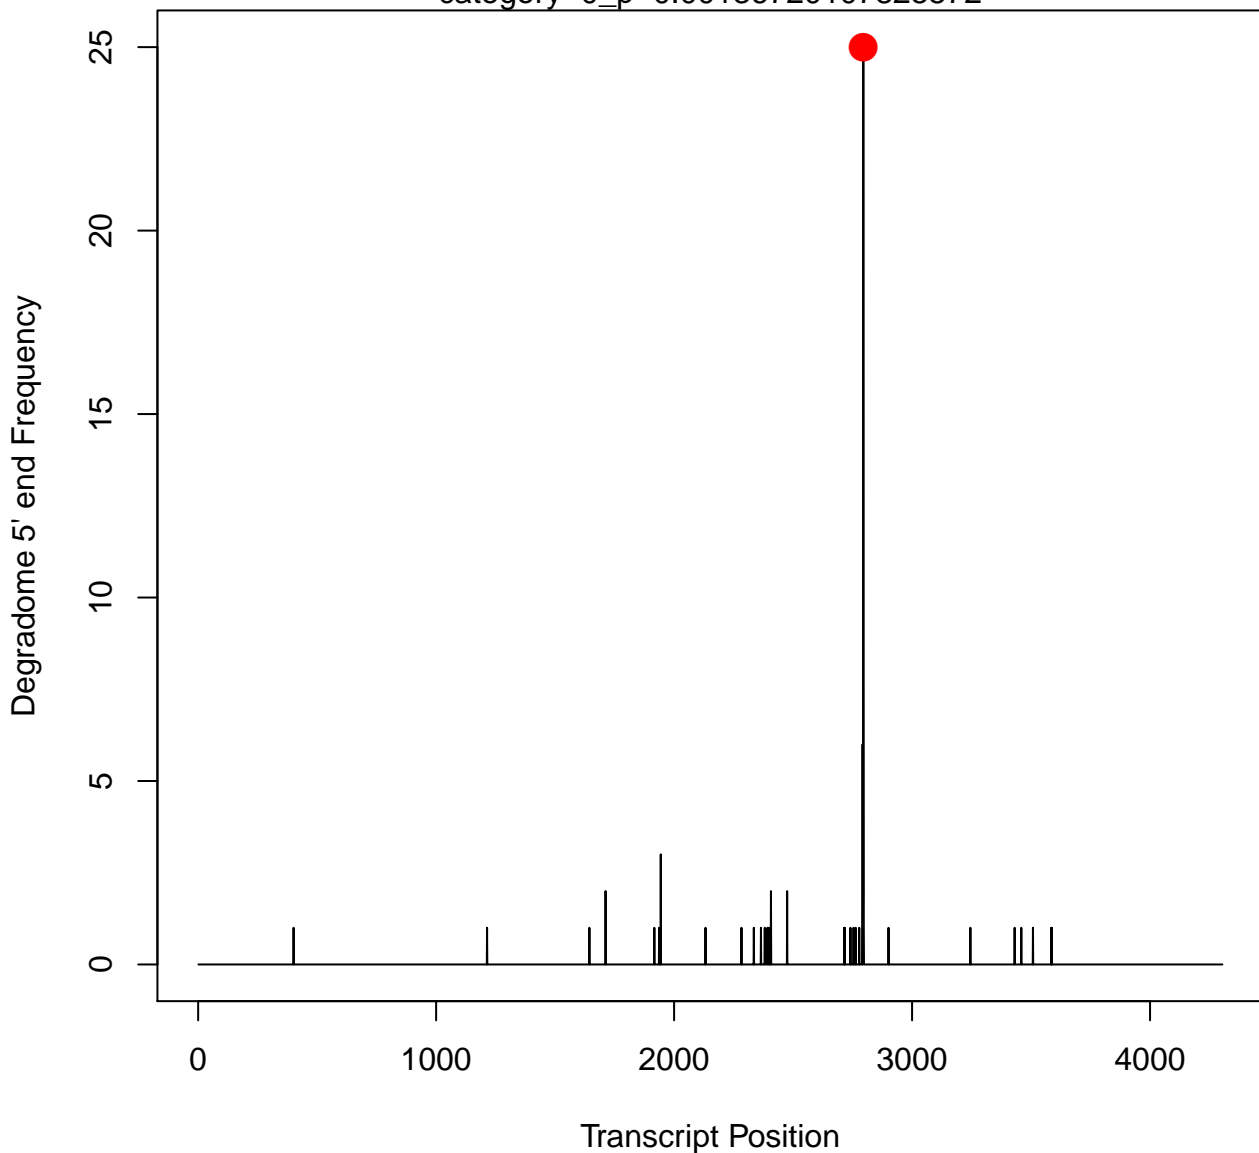

Supplement: s1 [file s1]

**T=Cluster-18410.71517\_Q=novel\_92\_S=2145**

category=0\_p=0.00136720107825572

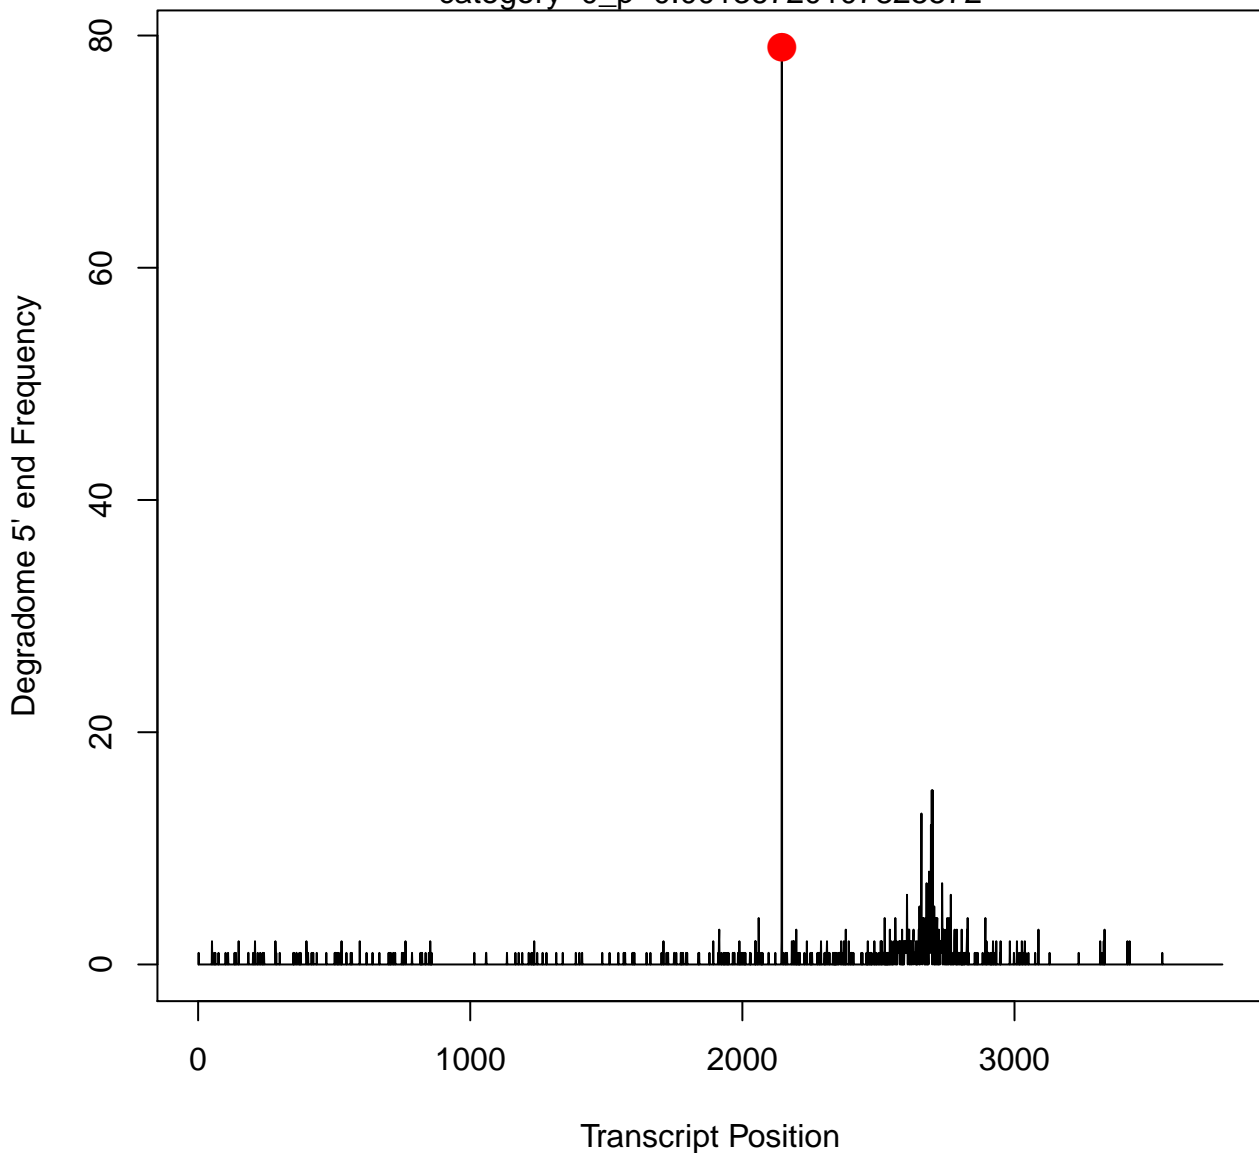

Supplement: s1 [file s1]

**T=Cluster-18410.85405\_Q=novel\_143\_S=1388**

category=0\_p=0.00245961596621247

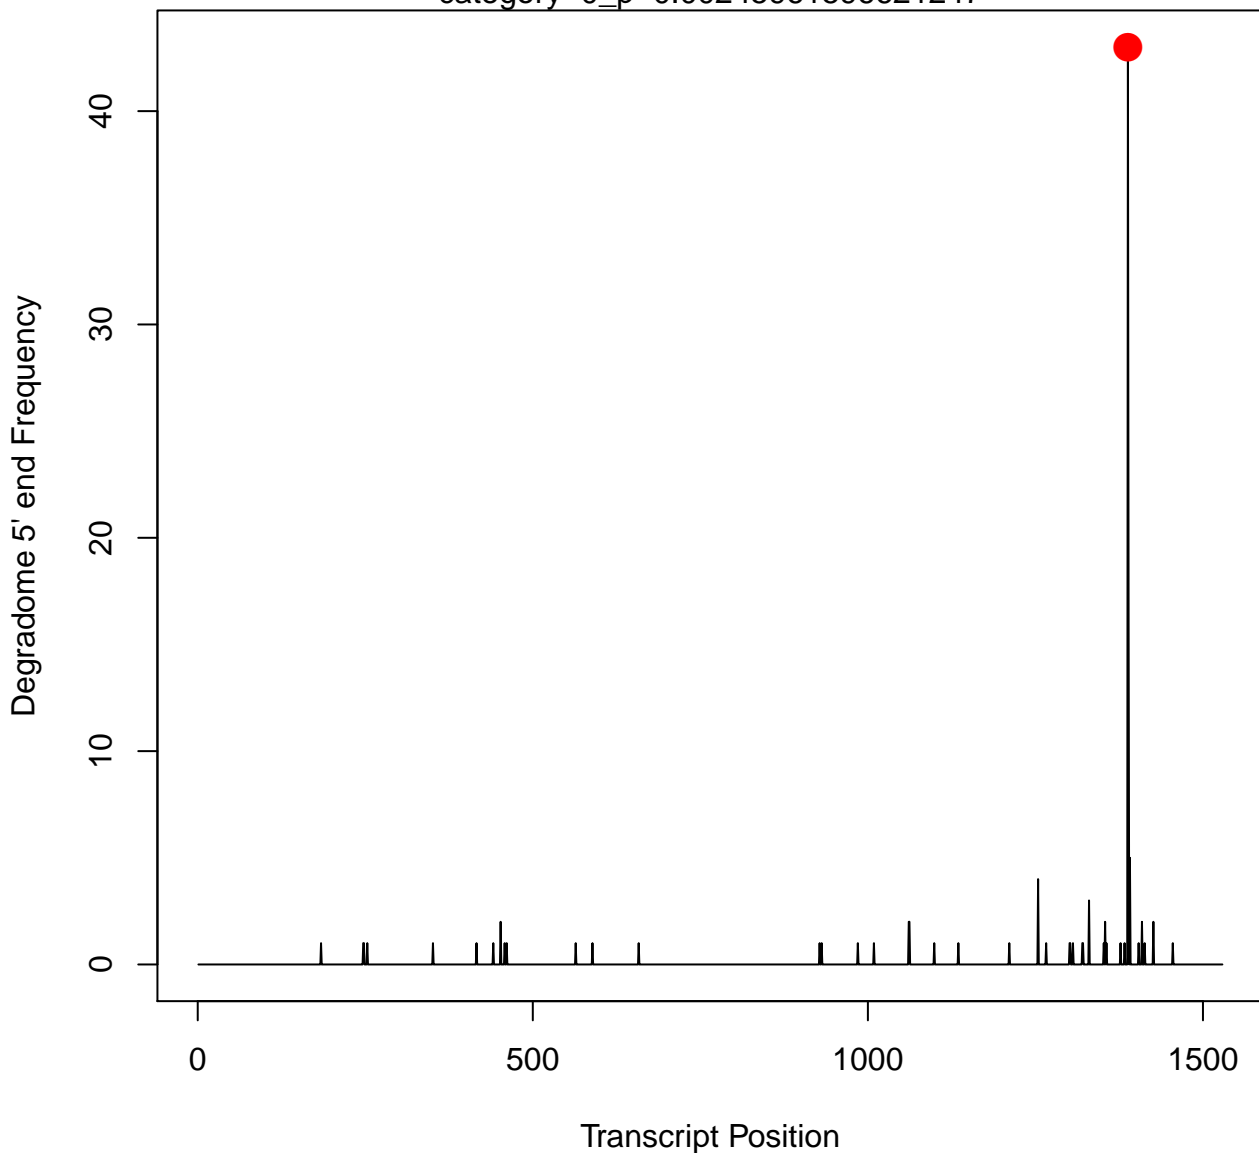

Supplement: s1 [file s1]

**T=Cluster-18410.66951\_Q=novel\_2\_S=1487**

category=0\_p=0.00382345425486719

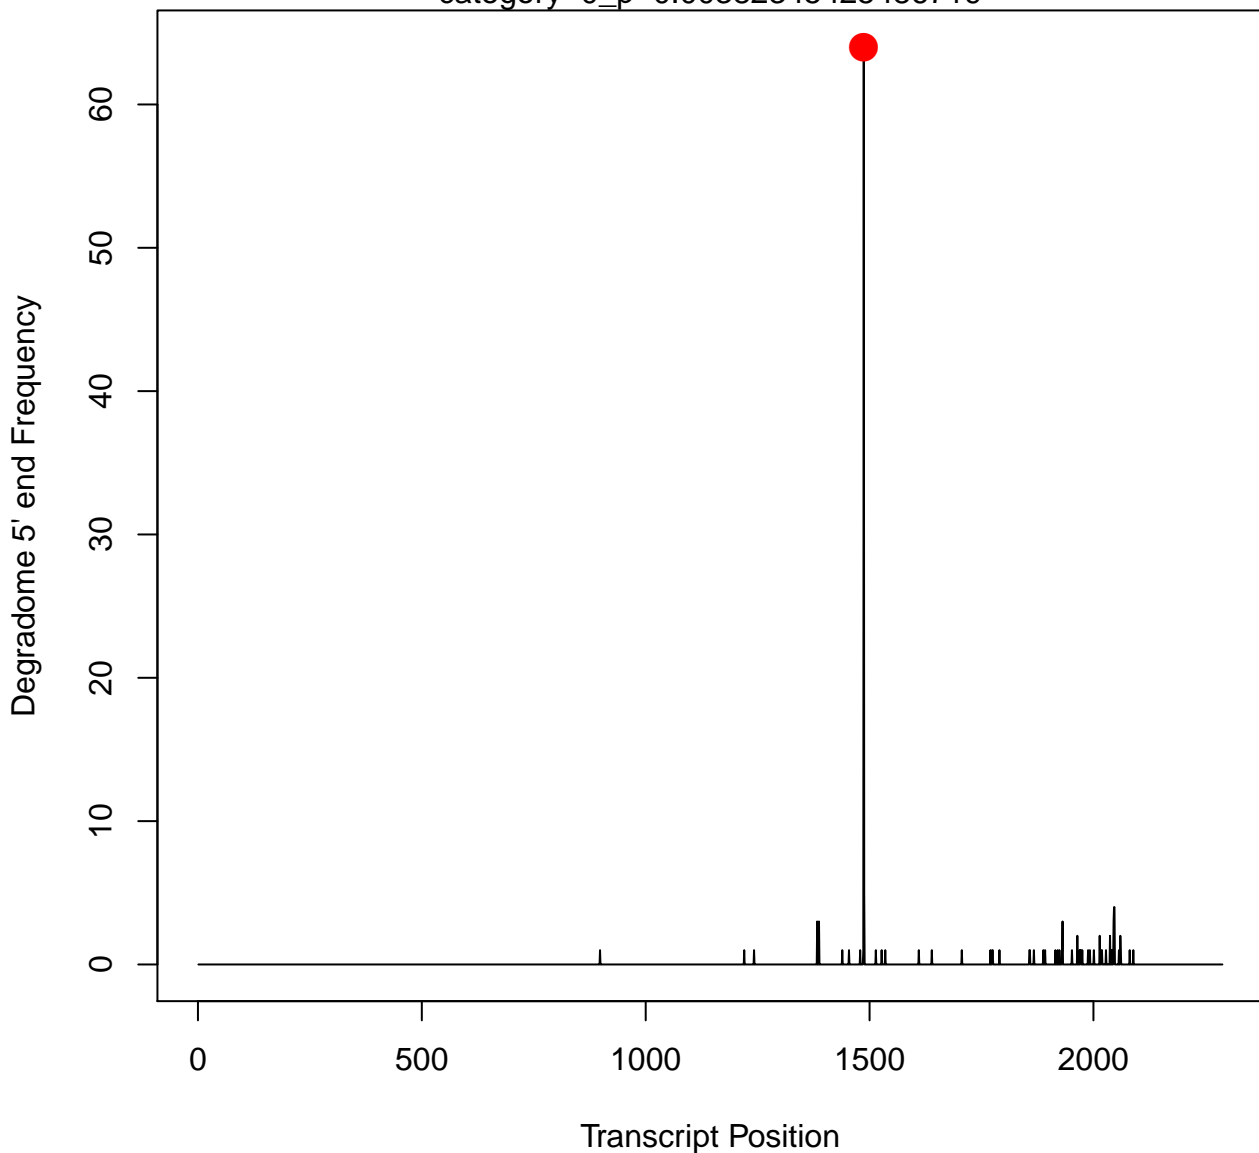

Supplement: s1 [file s1]

**T=Cluster-18410.12159\_Q=novel\_74\_S=523**

category=0\_p=0.00300537520191857

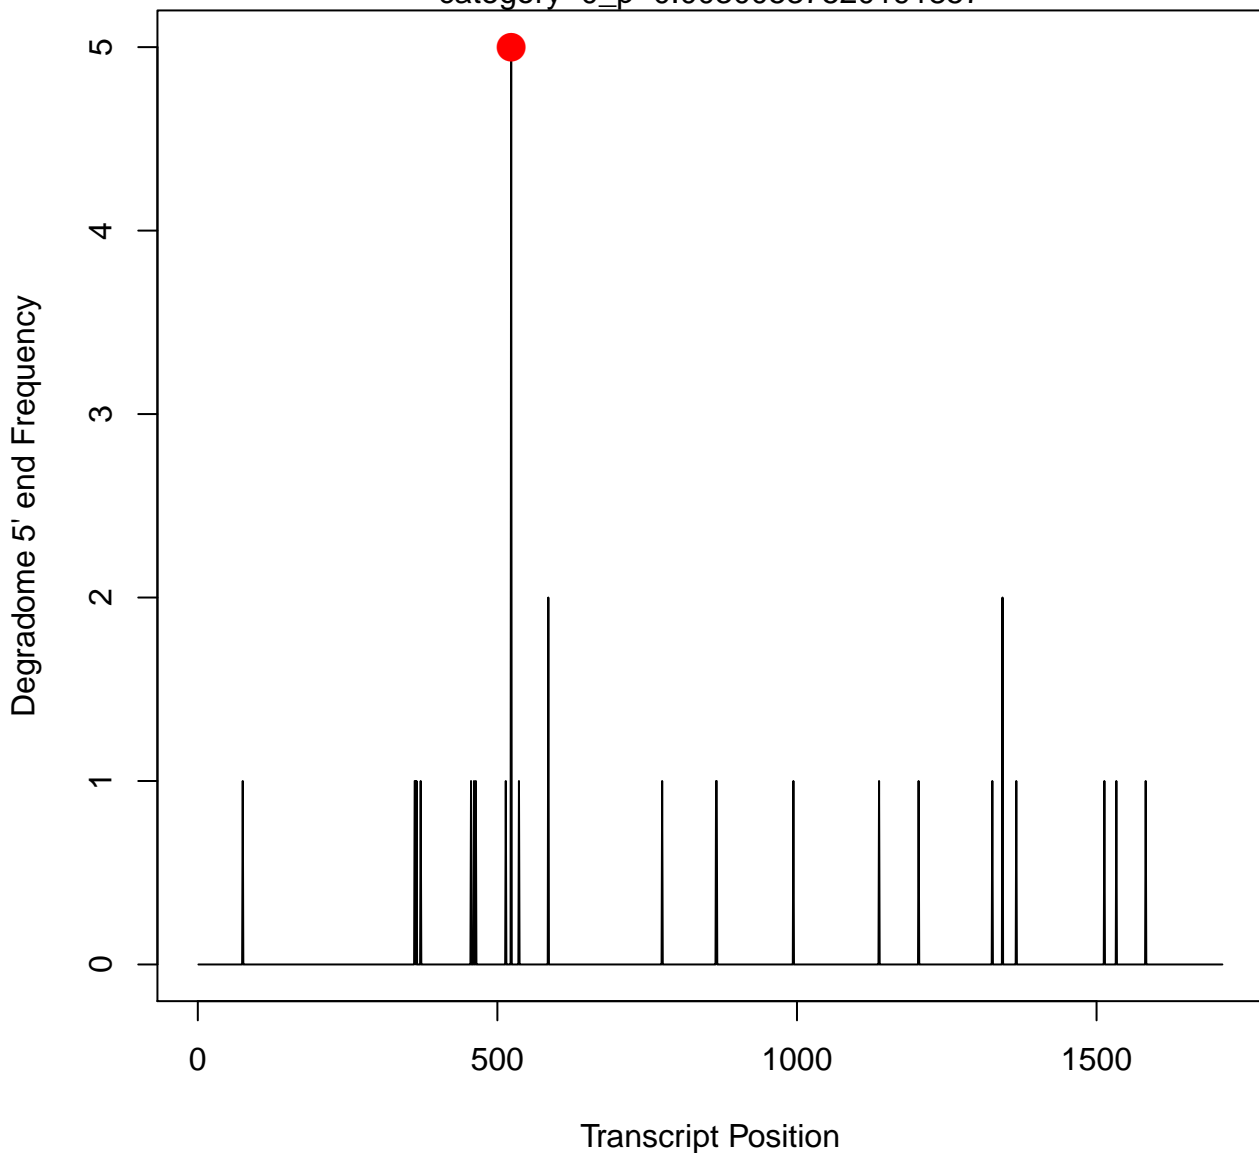

Supplement: s1 [file s1]

**T=Cluster-18410.6495\_Q=novel\_168\_S=99**

category=2\_p=0.0454020367599618

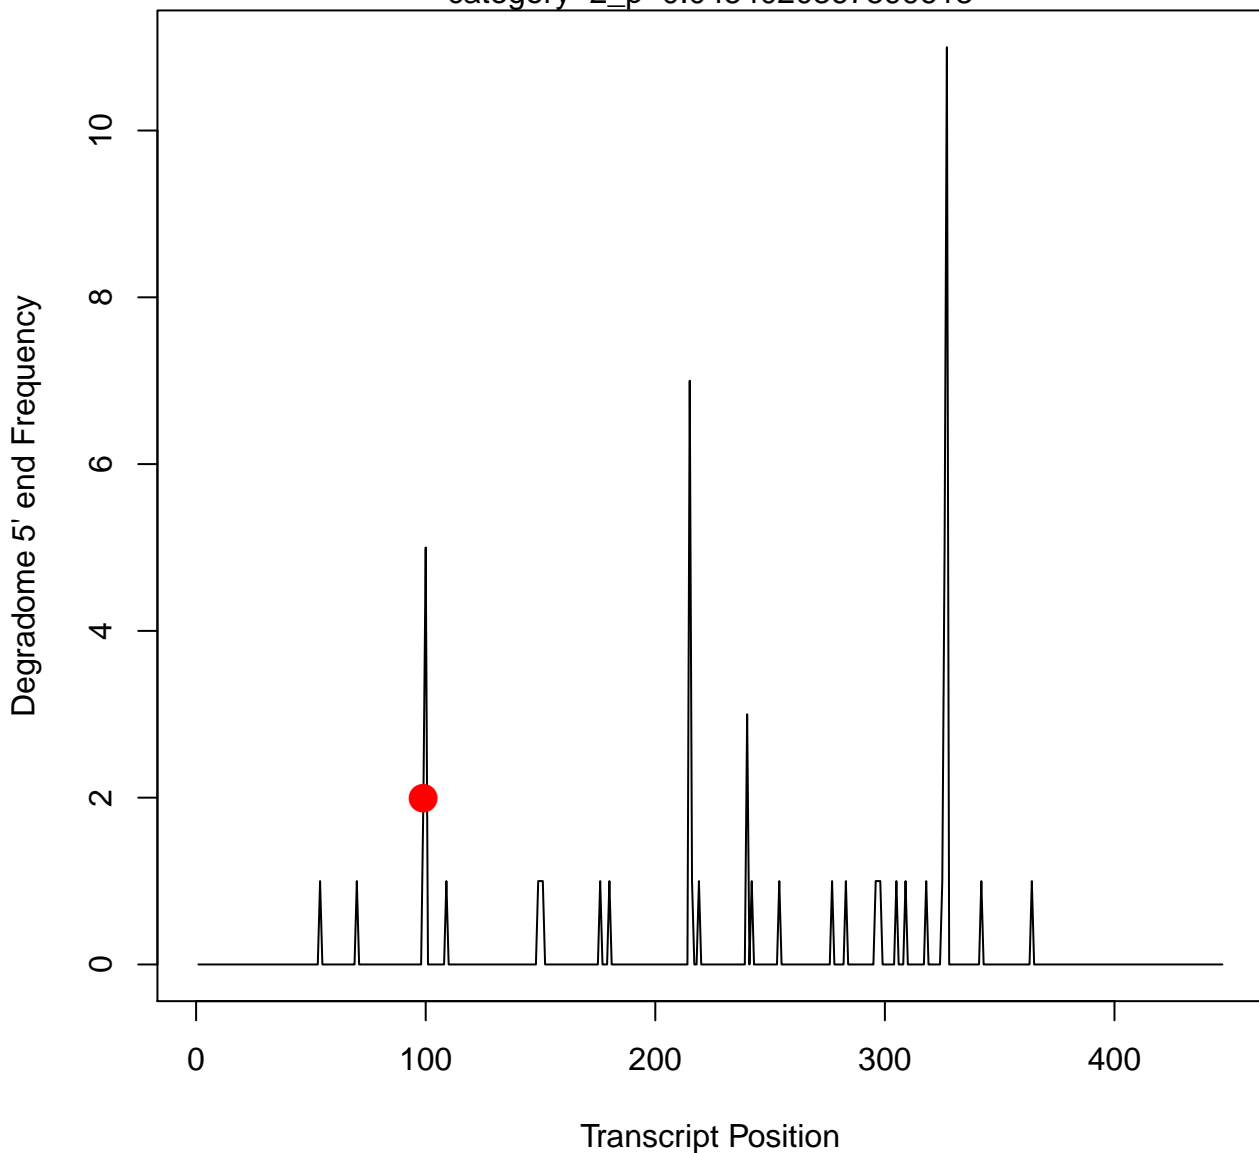

Supplement: s1 [file s1]

**T=Cluster-18410.84714\_Q=novel\_20\_S=1519**

category=0\_p=0.00355083585007077

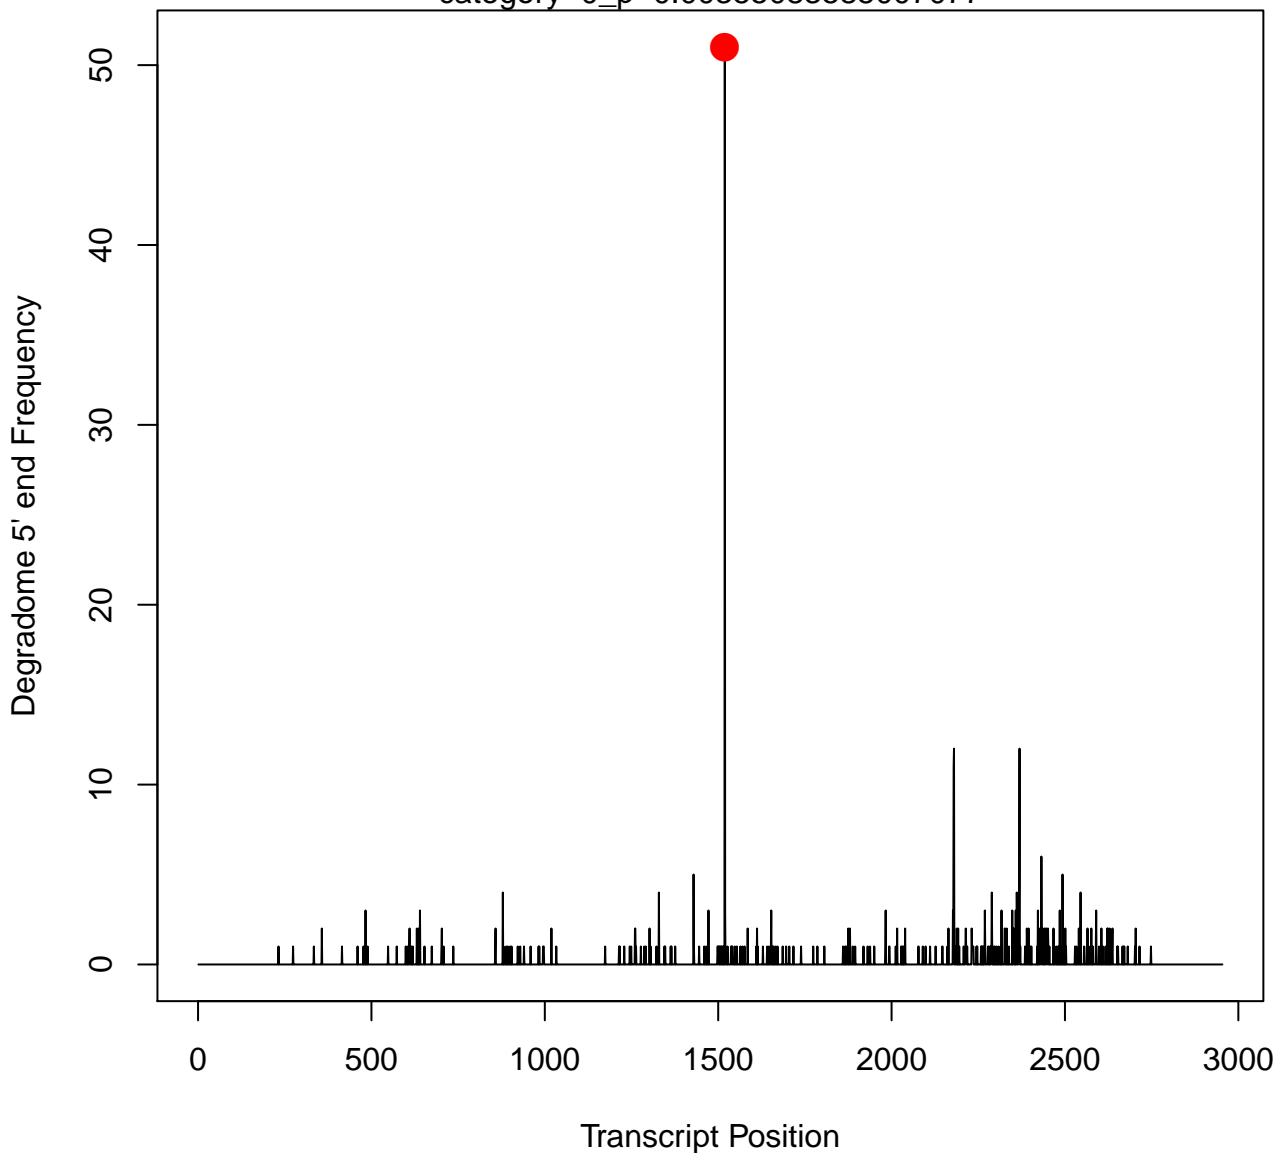

Supplement: s1 [file s1]

**T=Cluster-18410.85741\_Q=novel\_16\_S=1543**

category=0\_p=0.00027358987754178

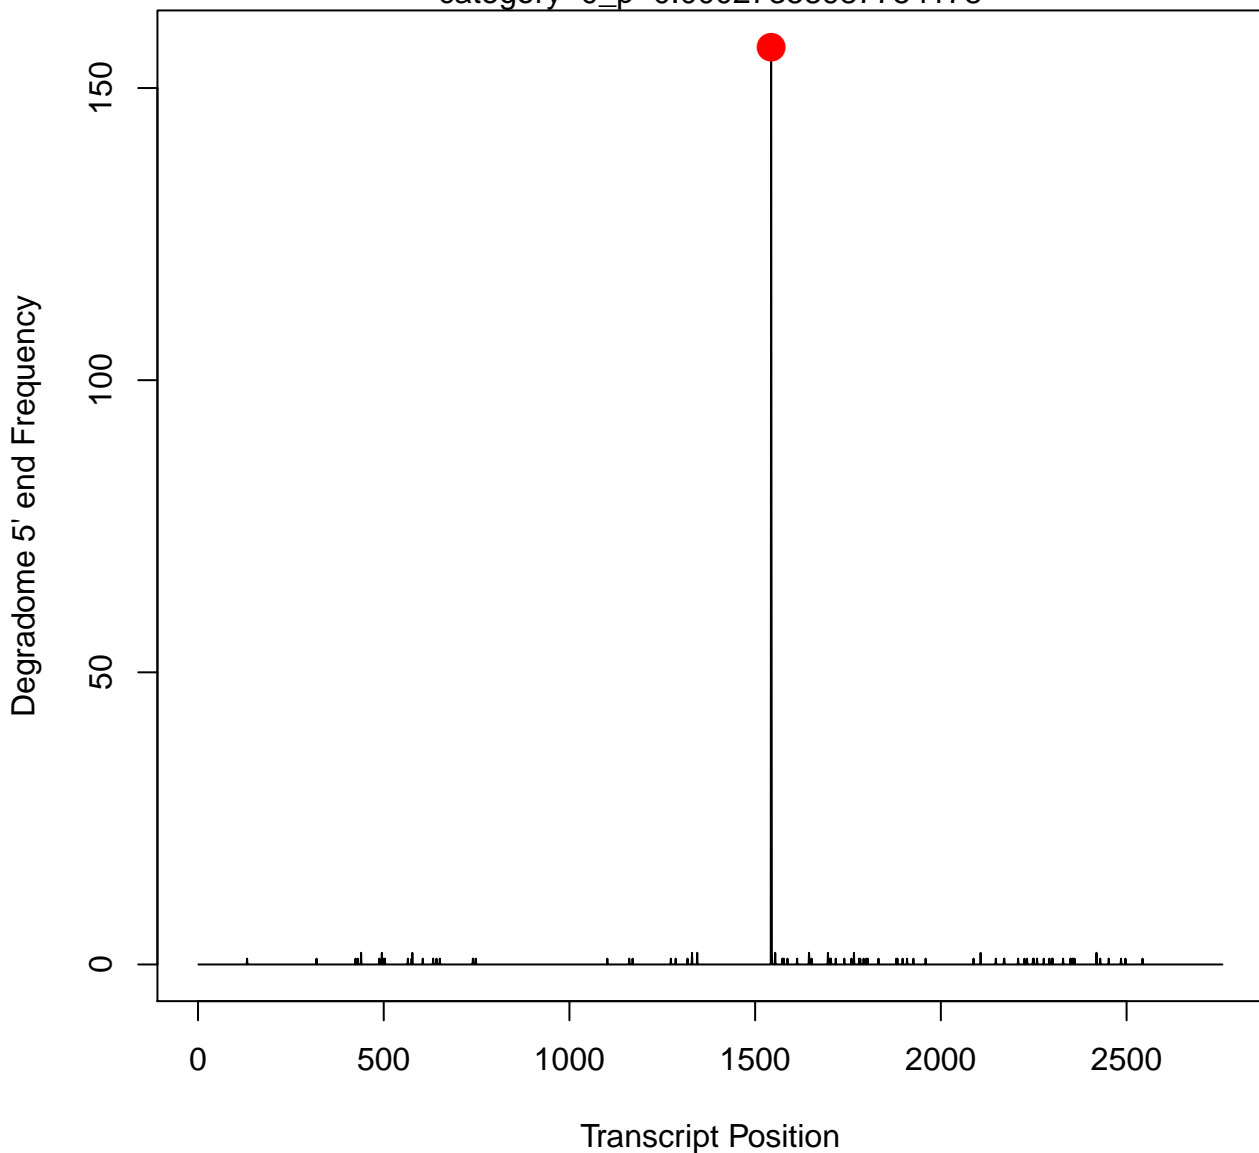

Supplement: s1 [file s1]

**T=Cluster-18410.1429\_Q=pma-miR390\_S=263**

category=3\_p=0.0107970886967577

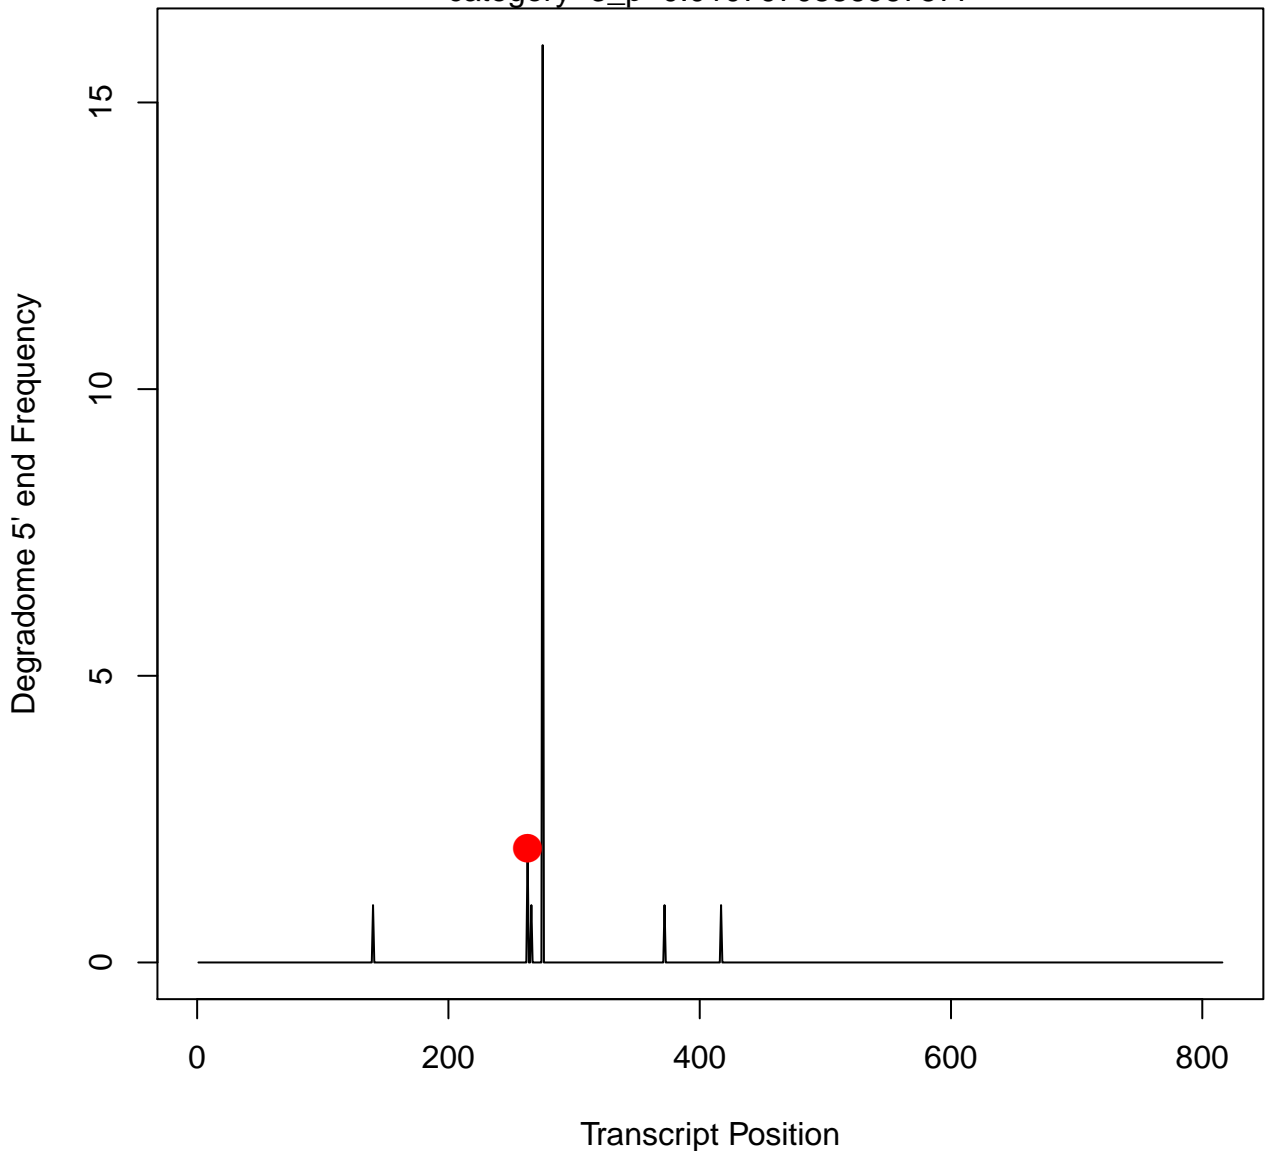

Supplement: s1 [file s1]

**T=Cluster-18410.37943\_Q=pma-miR482a\_S=194**

category=0\_p=0.0277901598934759

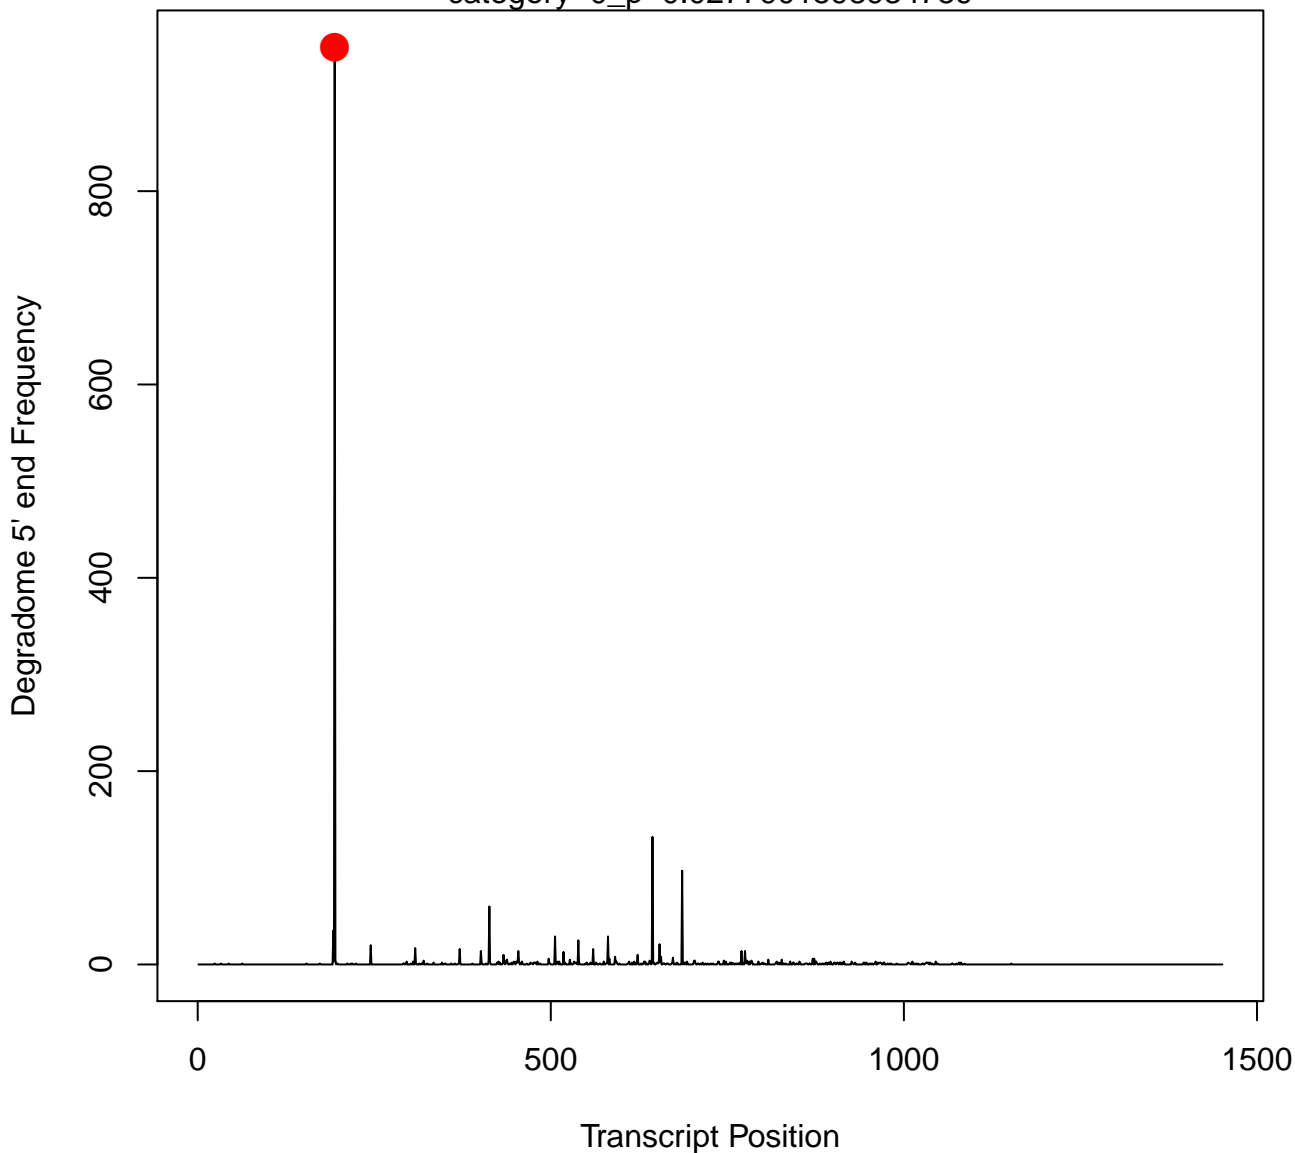

Supplement: s1 [file s1]

**T=Cluster-18410.20062\_Q=novel\_114\_S=853**

category=1\_p=0.0139399720253284

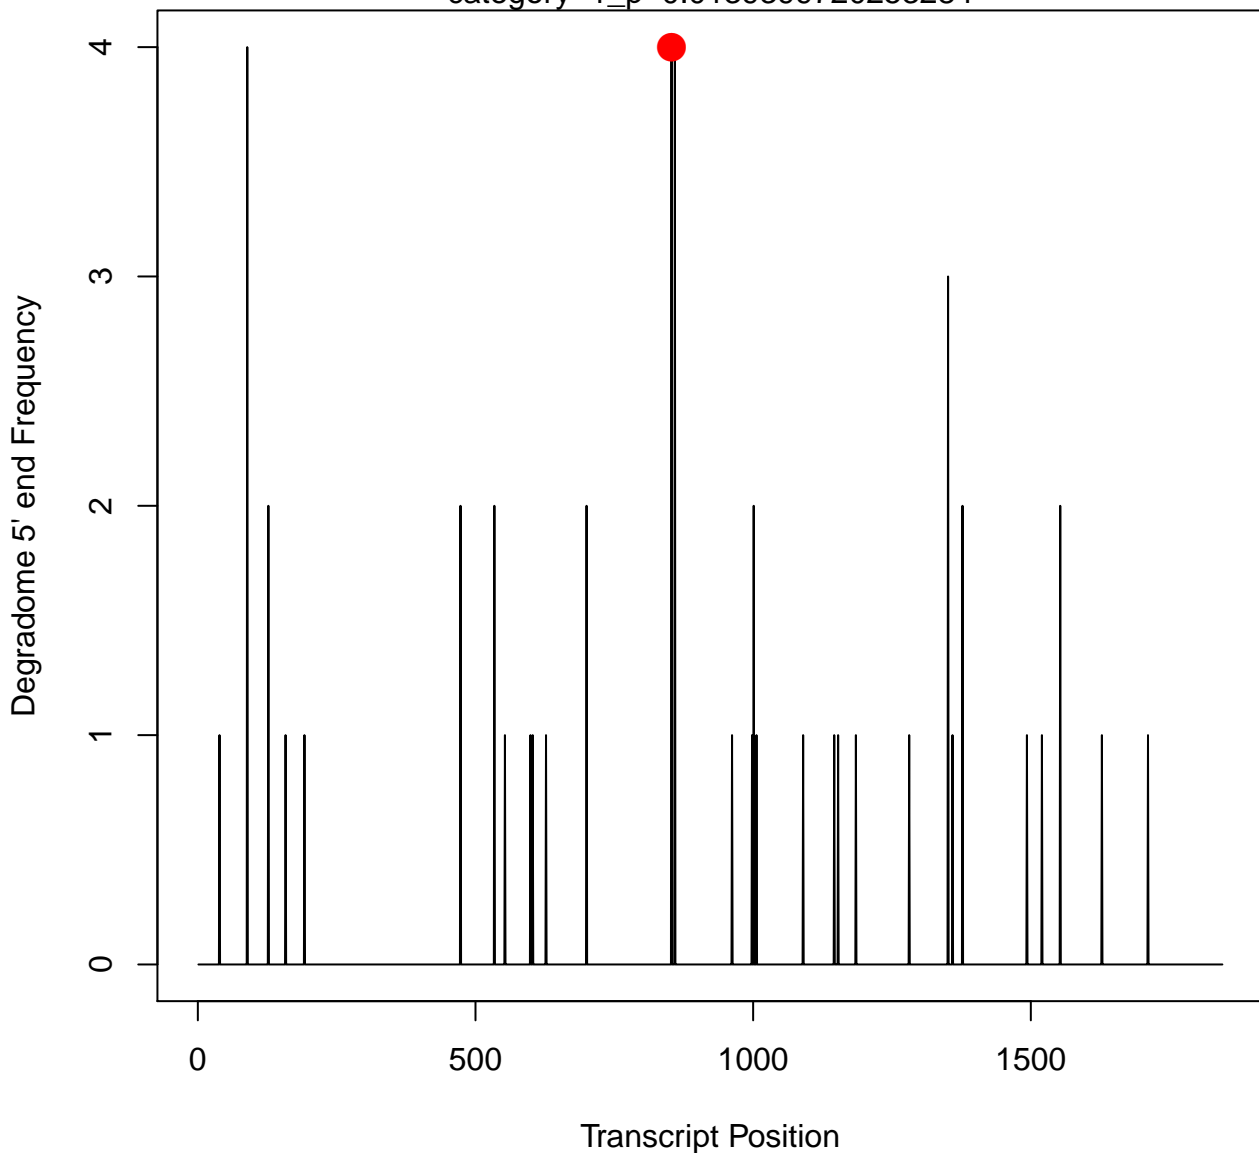

Supplement: s1 [file s1]

**T=Cluster-18410.25721\_Q=novel\_15\_S=93**

category=2\_p=0.0564267304887326

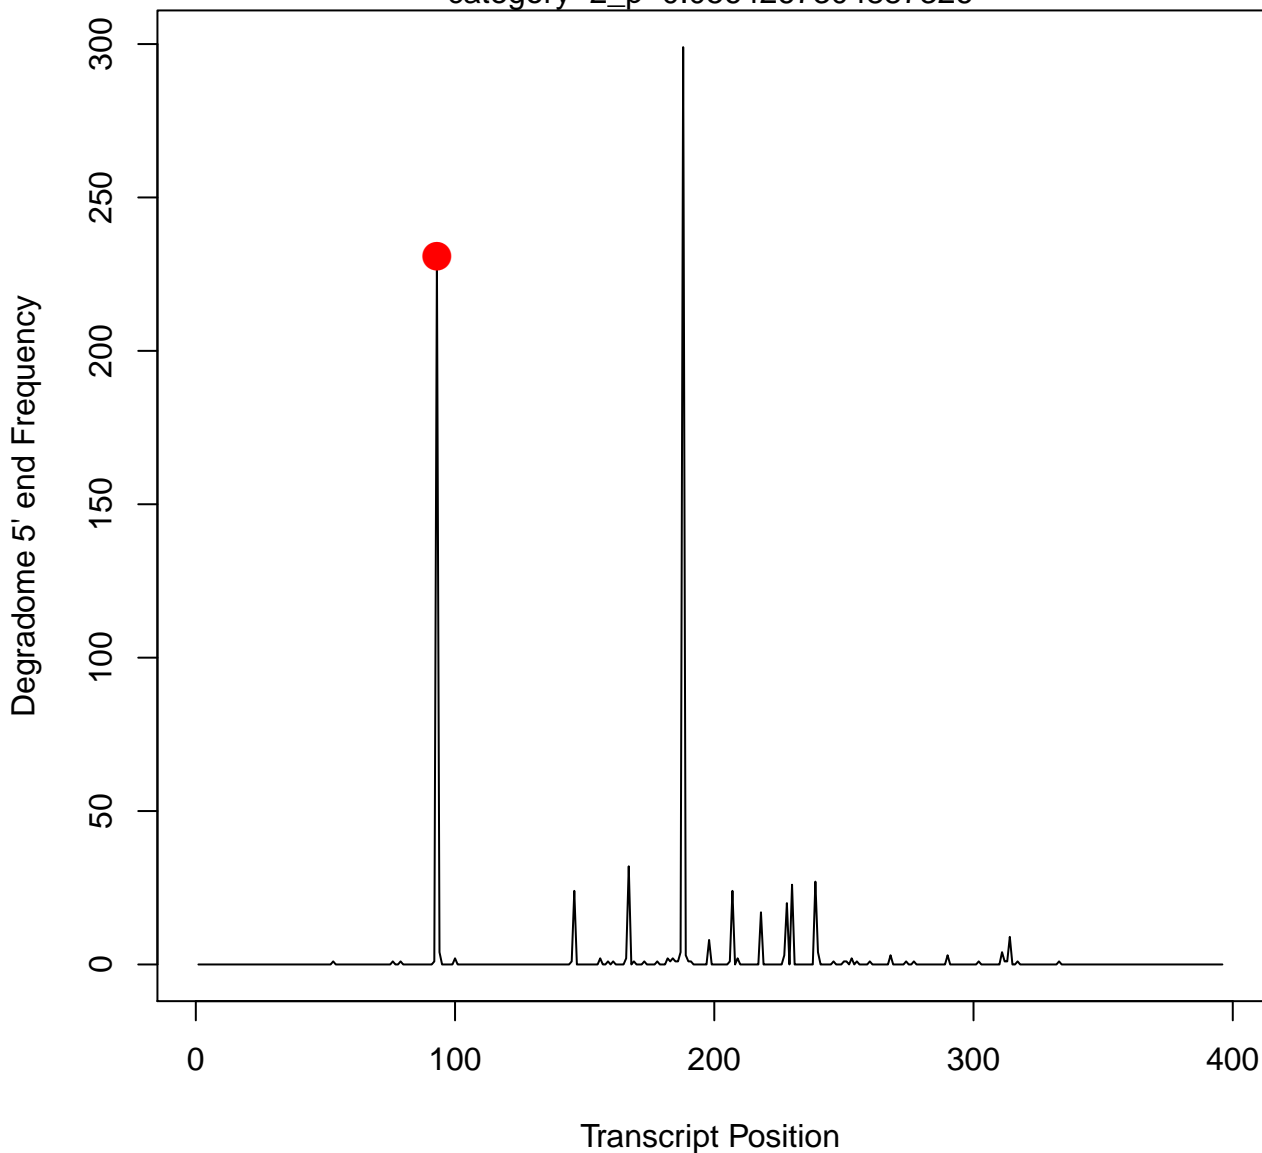

Supplement: s1 [file s1]

**T=Cluster-18410.89138\_Q=novel\_25\_S=29**

category=2\_p=0.0887427285779705

Degradome 5' end Frequency

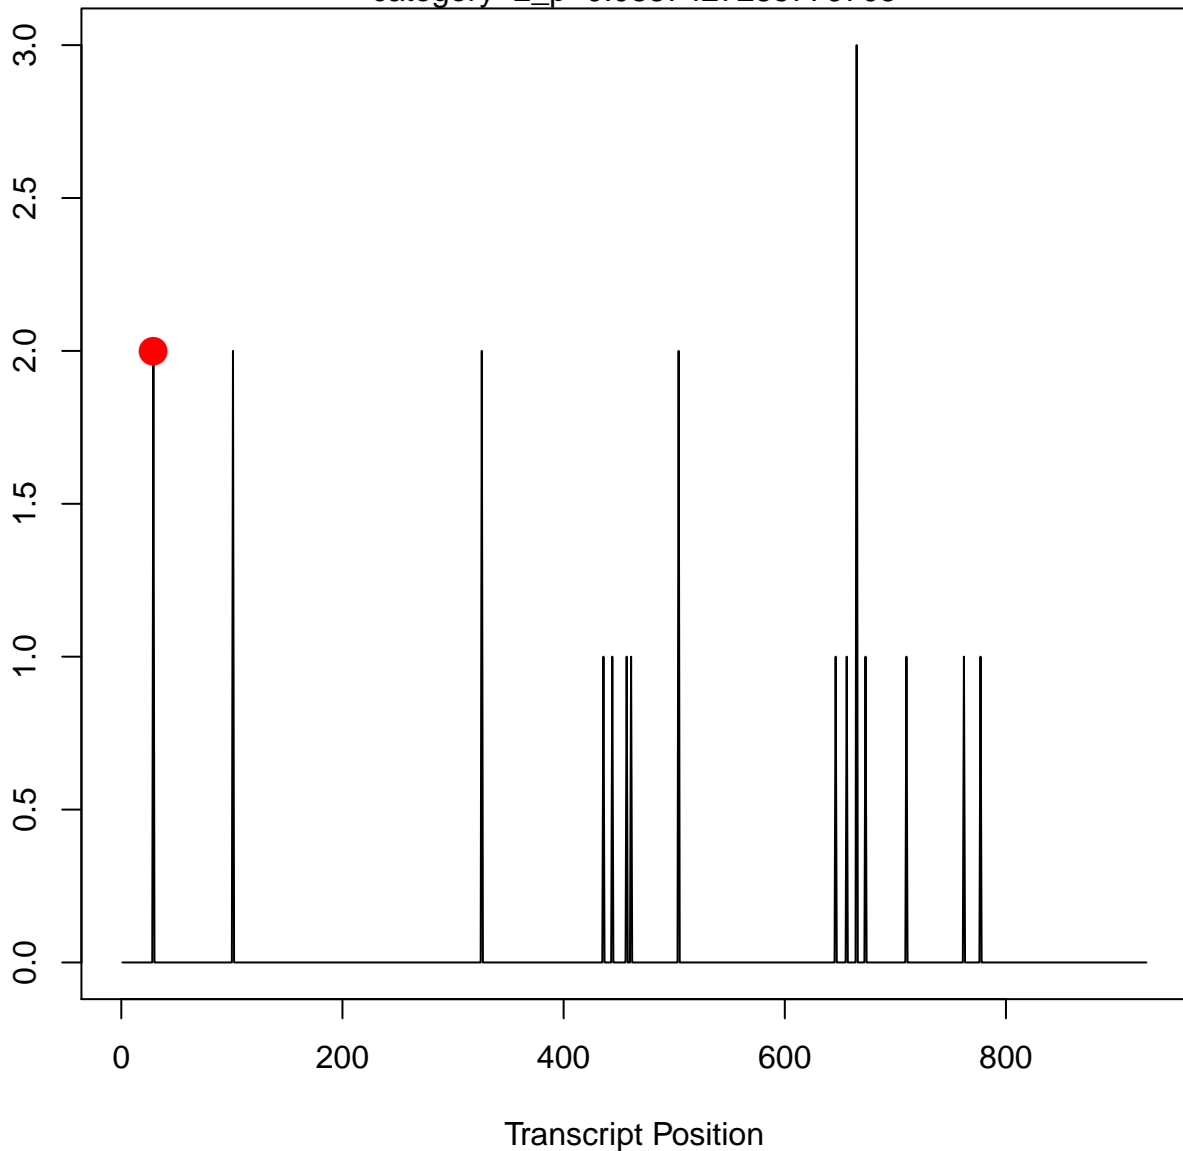

Supplement: s1 [file s1]

**T=Cluster-18410.60408\_Q=novel\_156\_S=660**

category=2\_p=0.0115490438418195

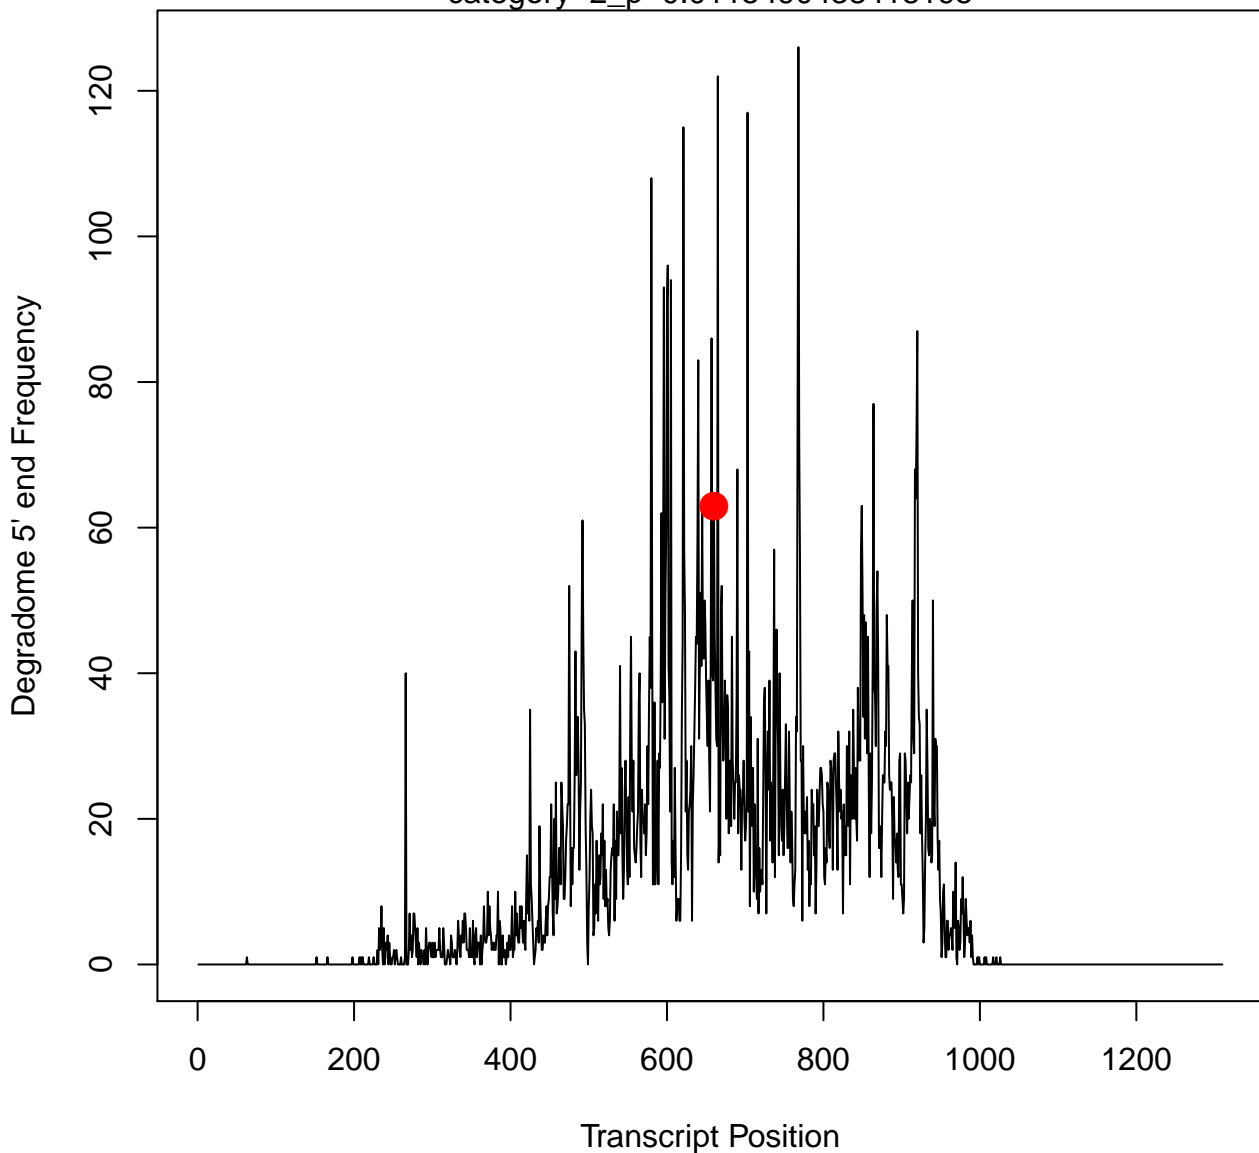

Supplement: s1 [file s1]

**T=Cluster-18410.47675\_Q=pma-miR949\_S=127**

category=0\_p=0.00980222508390338

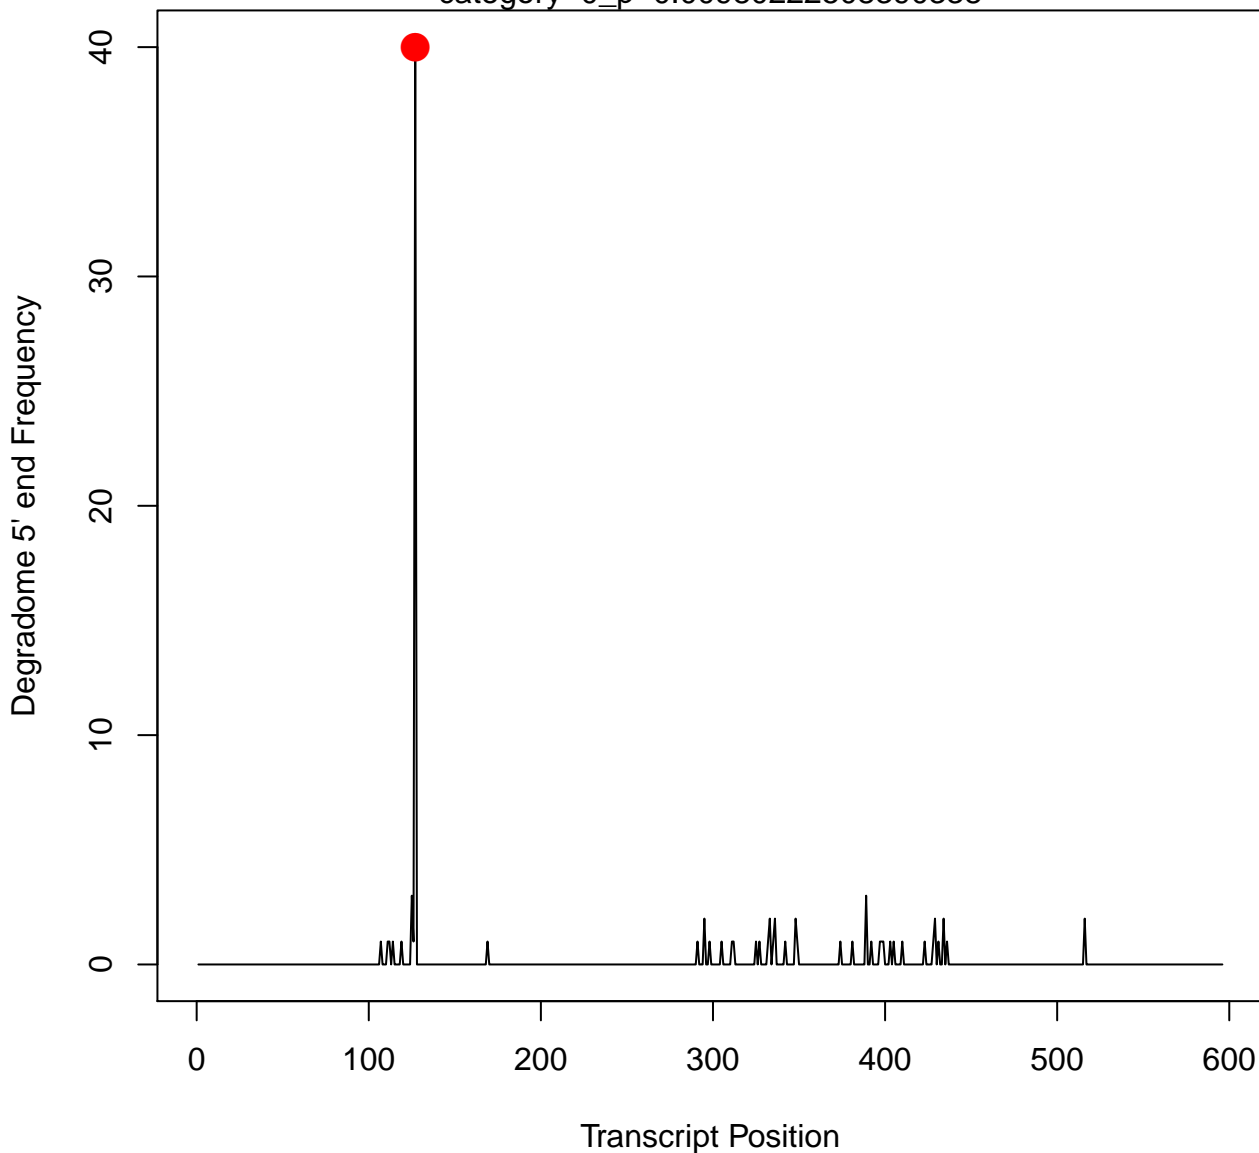

Supplement: s1 [file s1]

**T=Cluster-18410.67102\_Q=novel\_116\_S=1635**

category=2\_p=0.0115490438418195

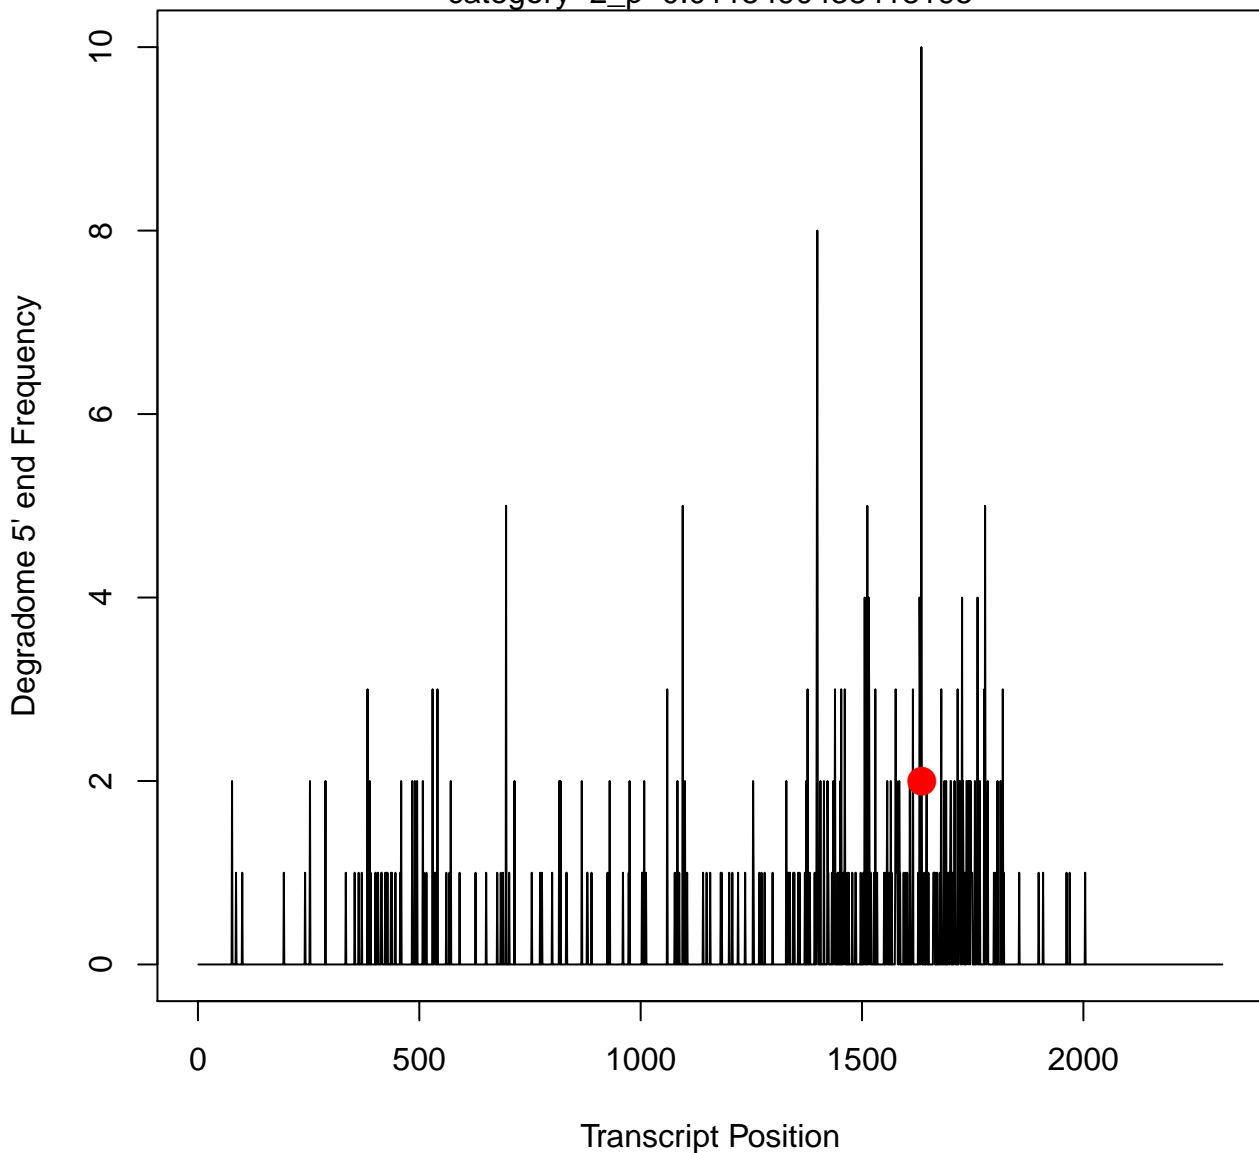

Supplement: s1 [file s1]

**T=Cluster-17679.0\_Q=novel\_12\_S=241**

category=0\_p=0.0111560245494552

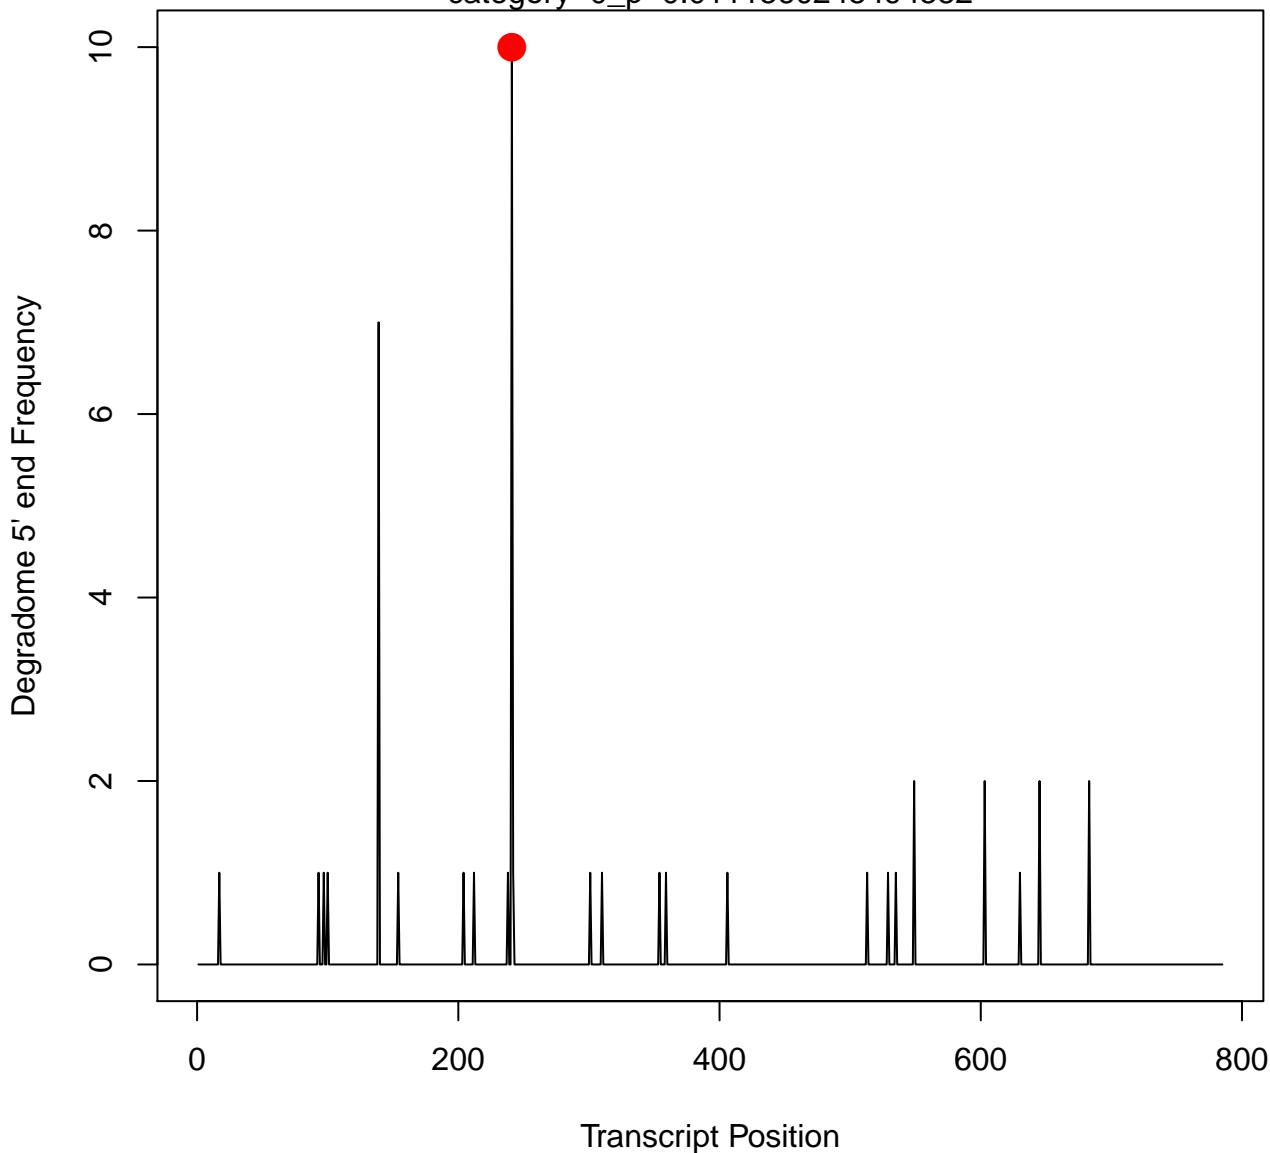

Supplement: s1 [file s1]

**T=Cluster-18410.12356\_Q=novel\_80\_S=363**

category=0\_p=0.0259262132261691

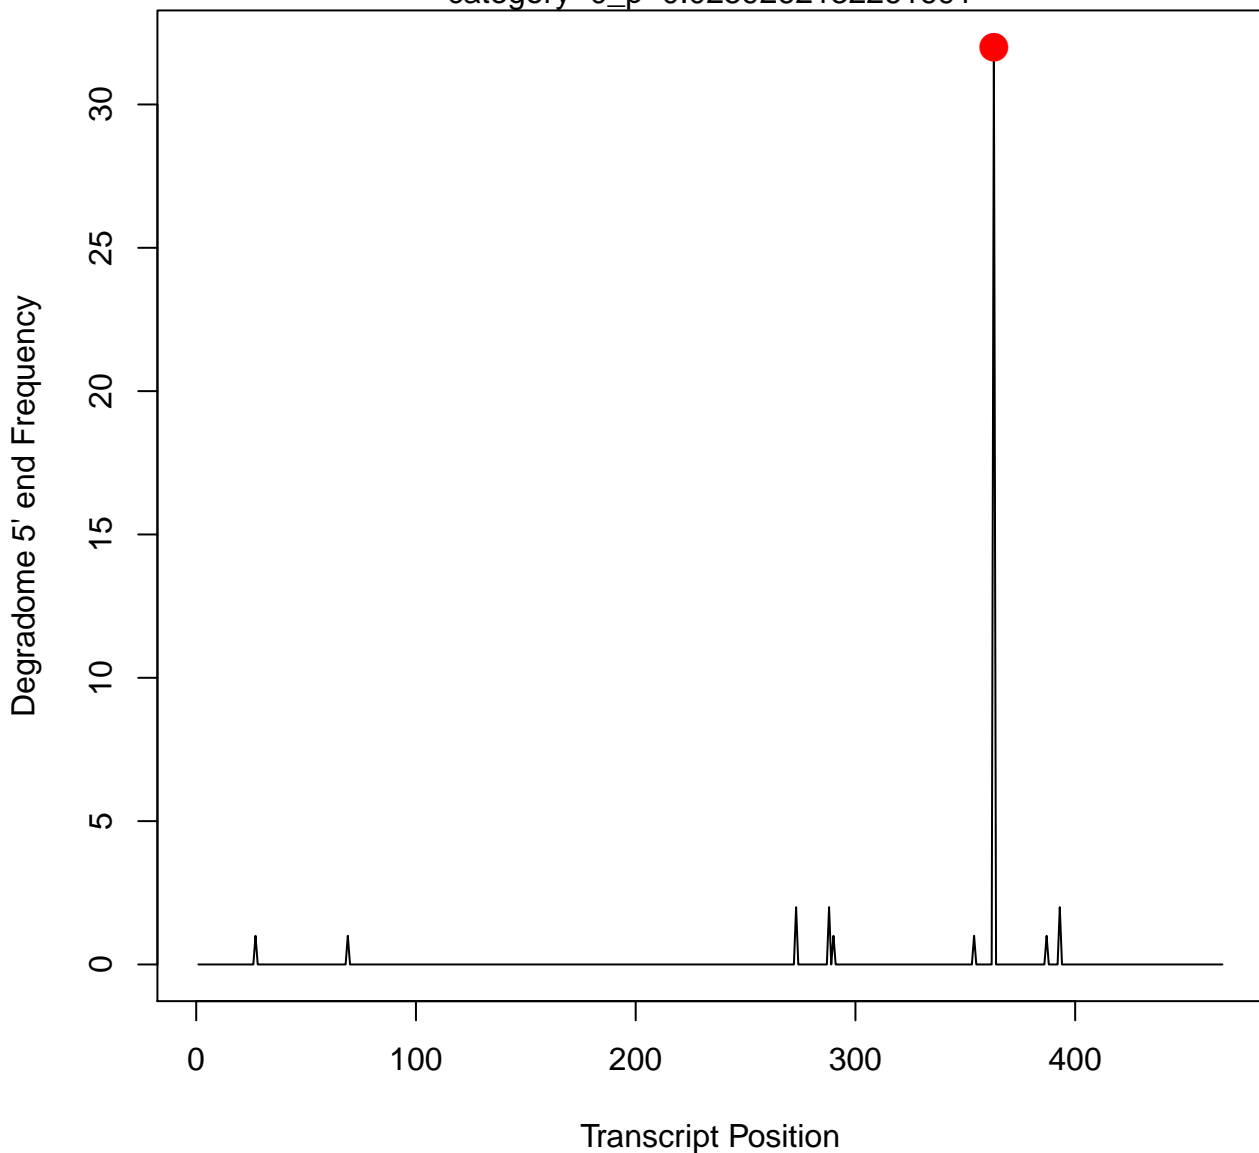

Supplement: s1 [file s1]

**T=Cluster-18410.72938\_Q=novel\_14\_S=1423**

category=0\_p=0.00327814283922701

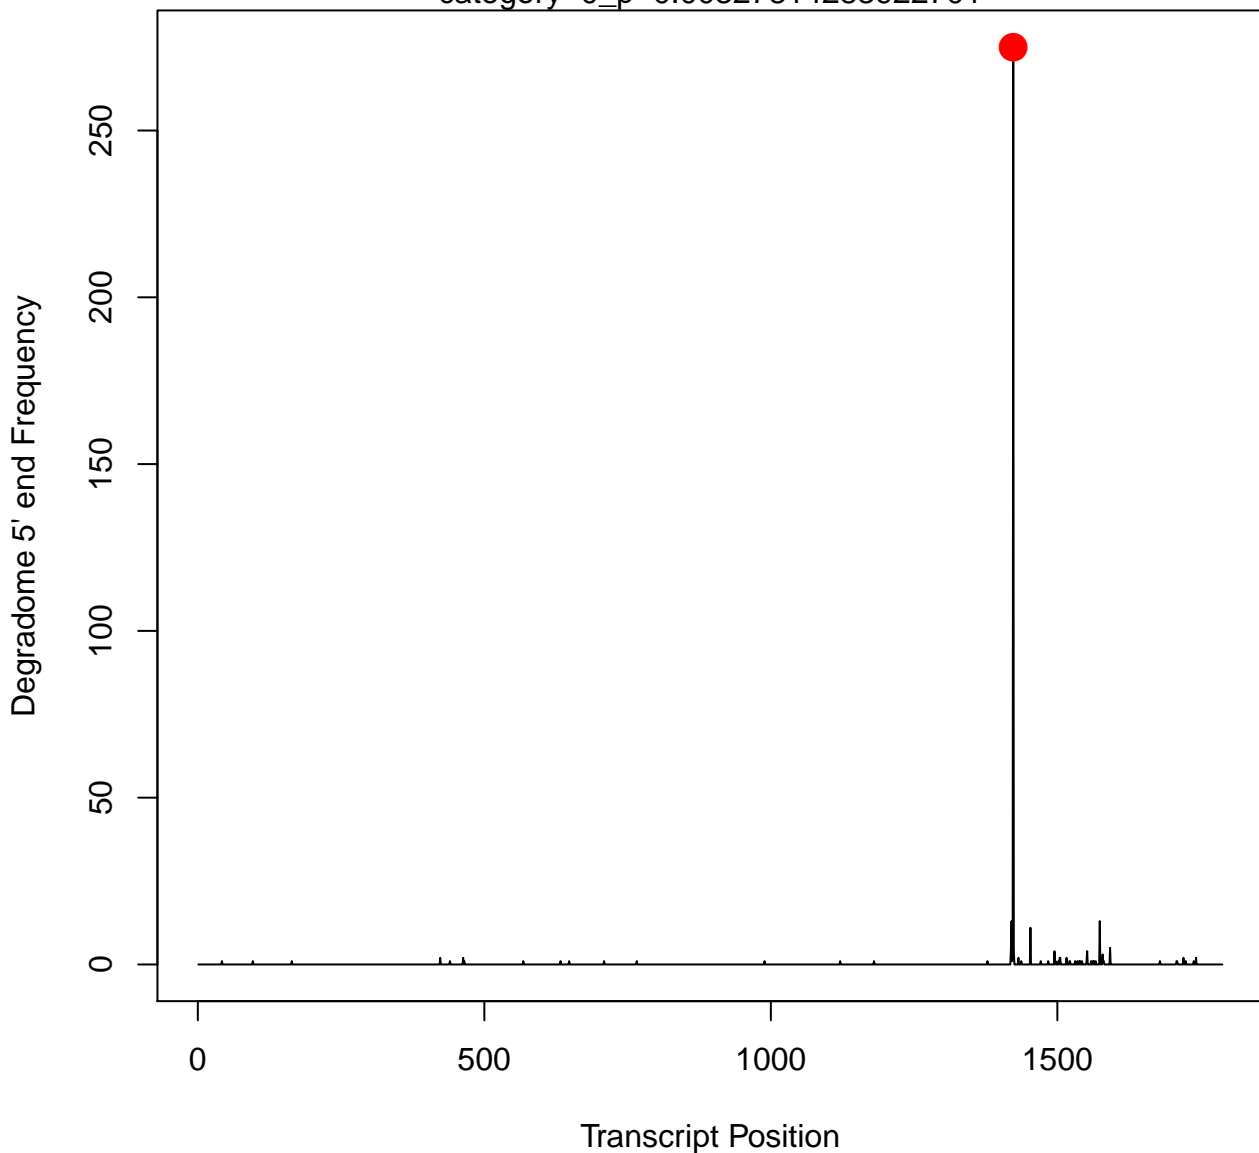

Supplement: s1 [file s1]

**T=Cluster-18410.97357\_Q=novel\_9\_S=493**

category=0\_p=0.00382345425486719

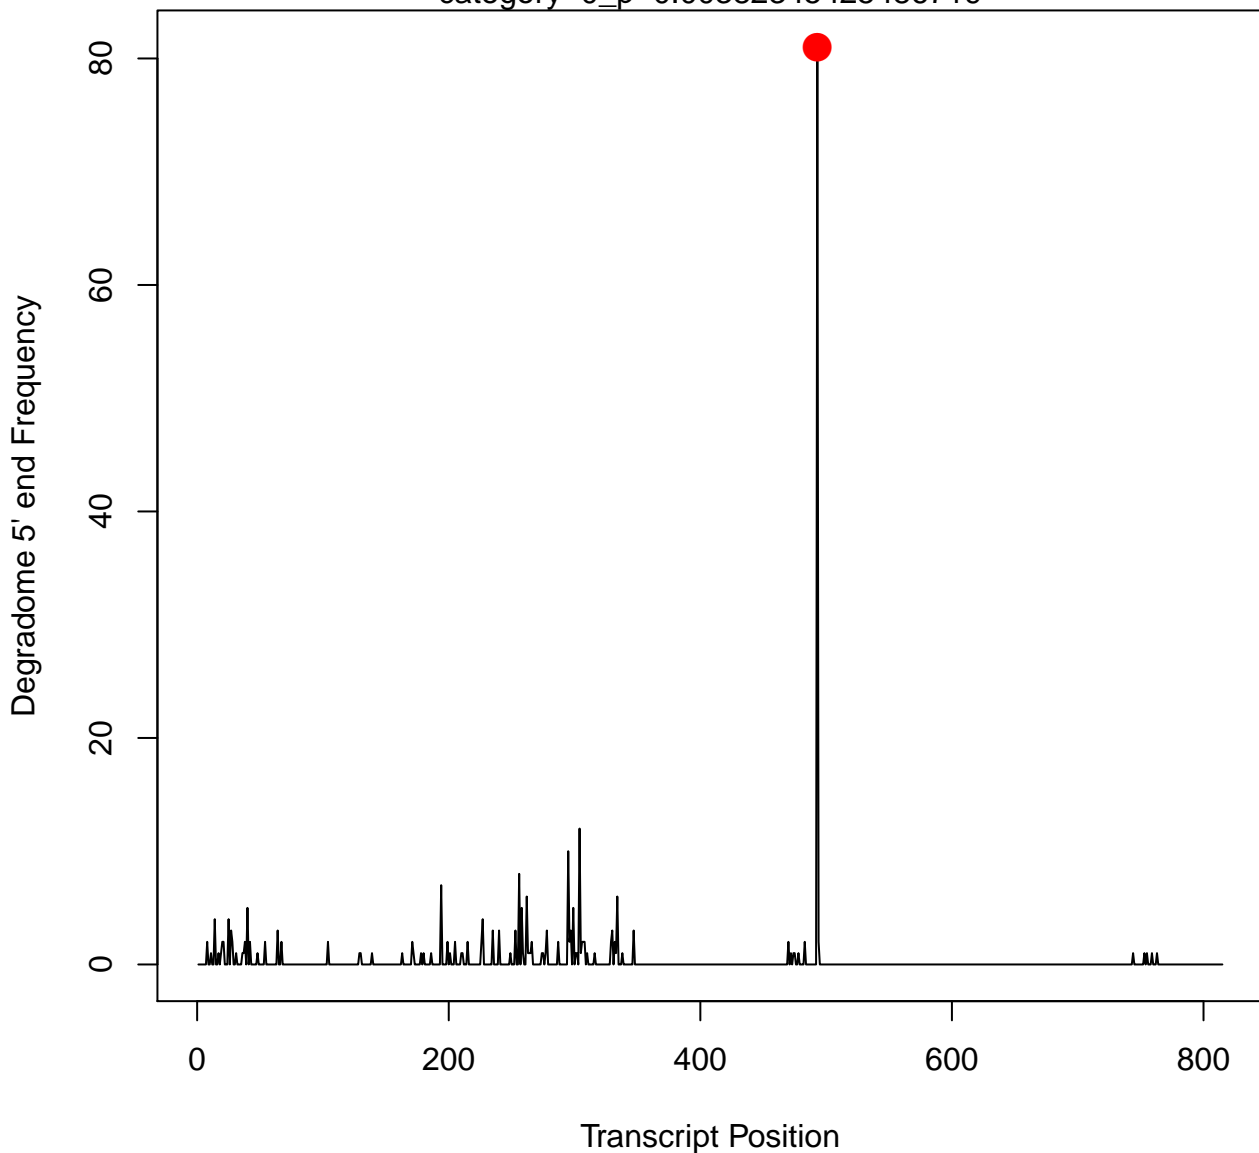

Supplement: s1 [file s1]

**T=Cluster-18410.41734\_Q=novel\_82\_S=256**

category=2\_p=0.0115490438418195

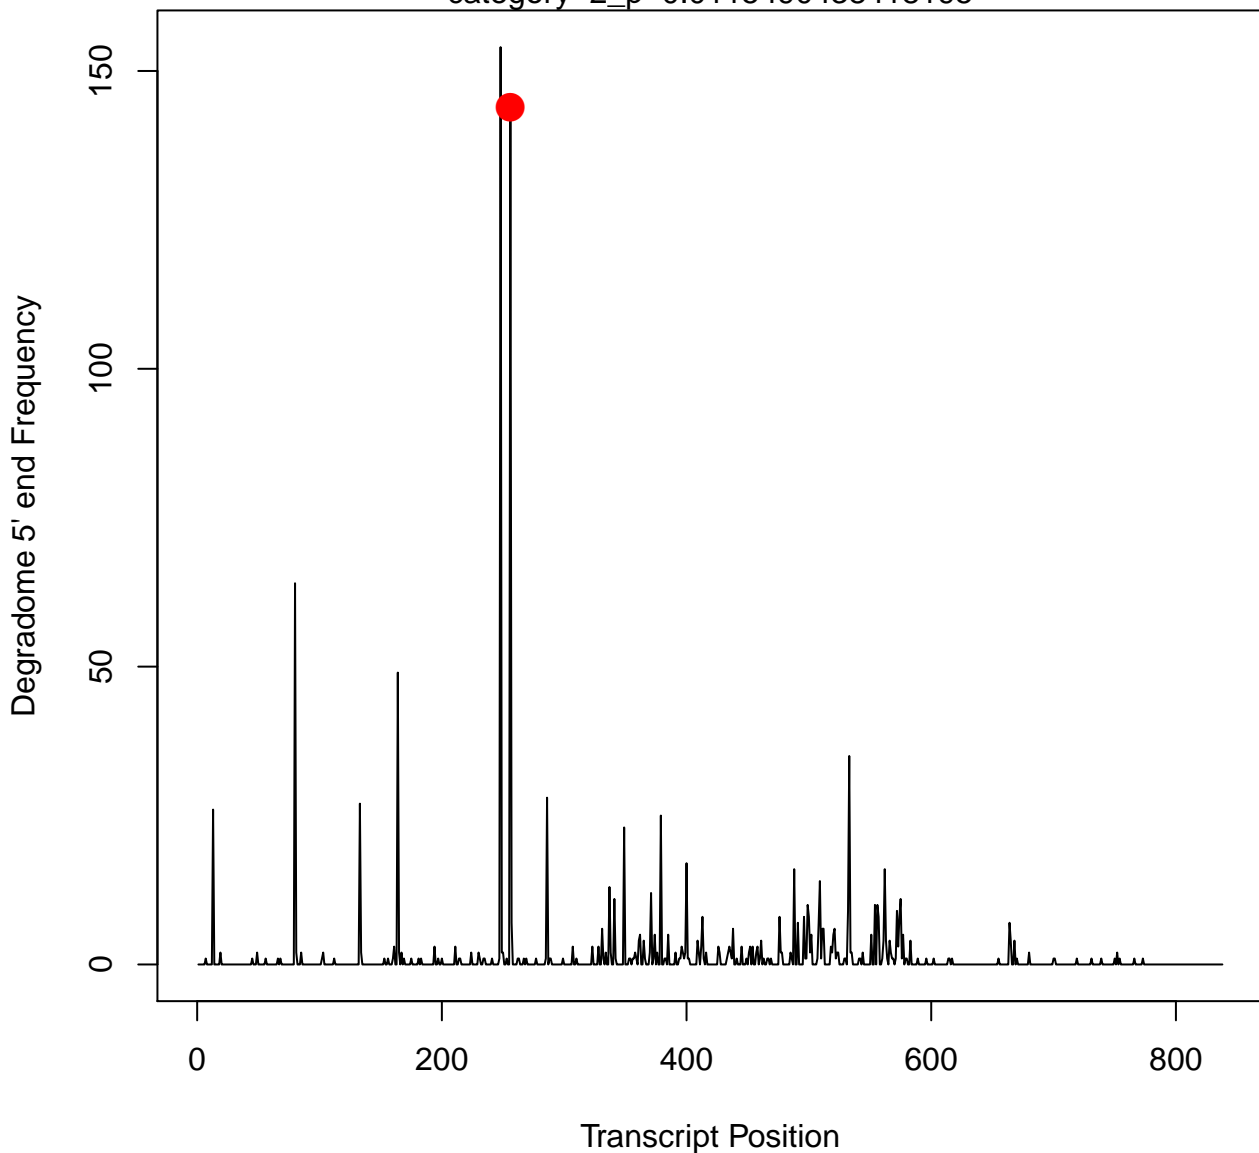

Supplement: s1 [file s1]

**T=Cluster-20177.0\_Q=novel\_9\_S=1472**

category=0\_p=0.0106147270149937

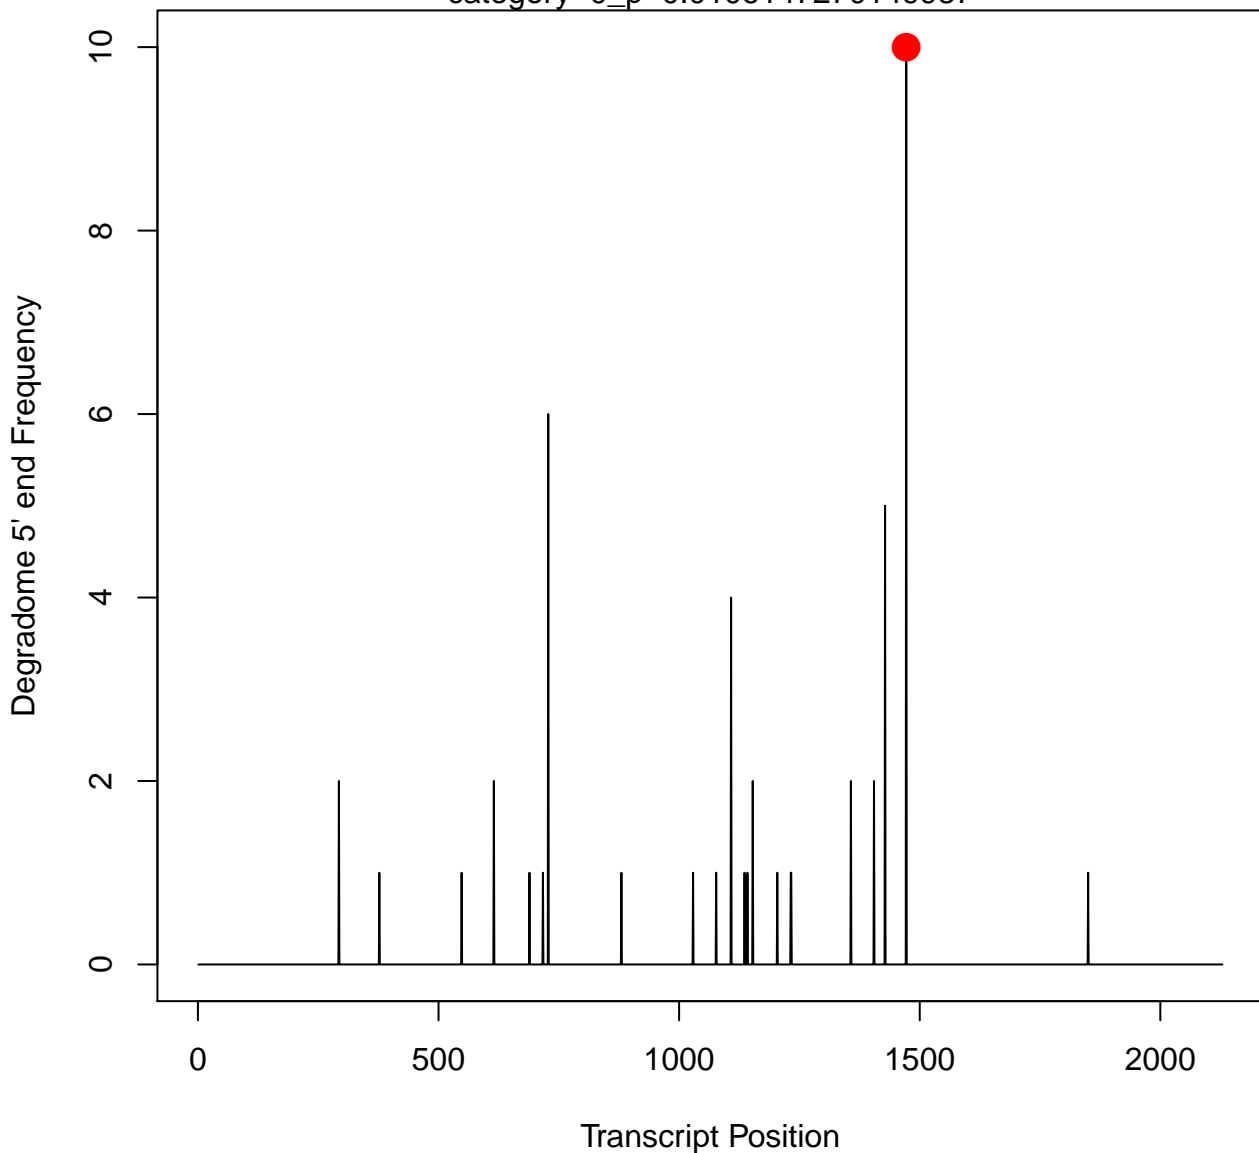

Supplement: s1 [file s1]

**T=Cluster-13027.0\_Q=pma-miR949\_S=106**

category=0\_p=0.00218662432695249

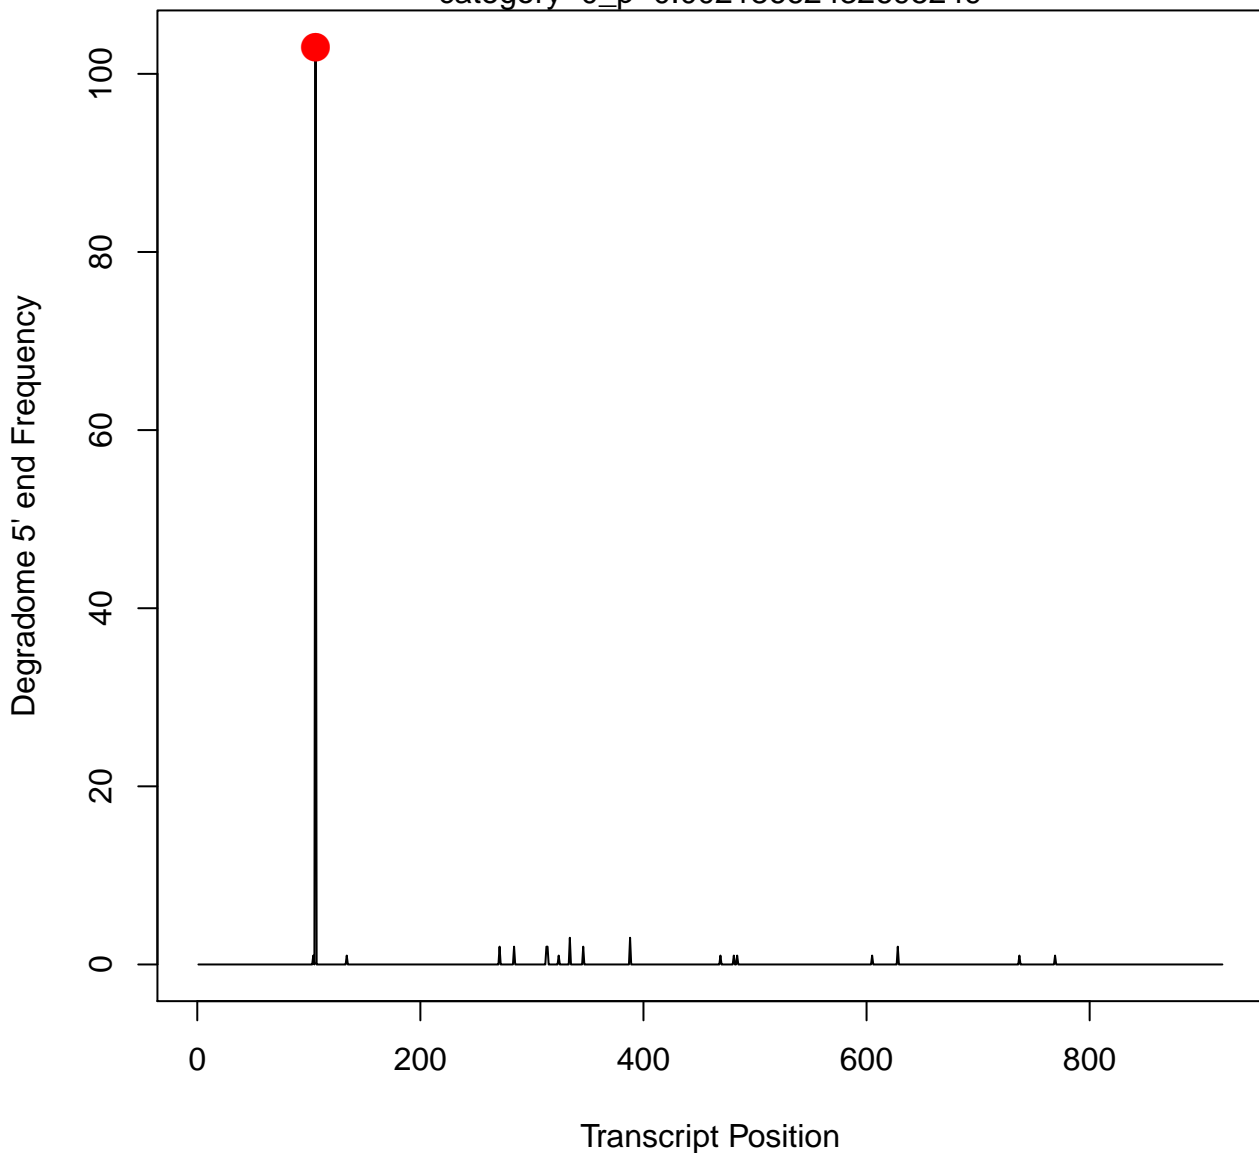

Supplement: s1 [file s1]

**T=Cluster-18410.101494\_Q=novel\_63\_S=278**

category=4\_p=0.0483072886549676

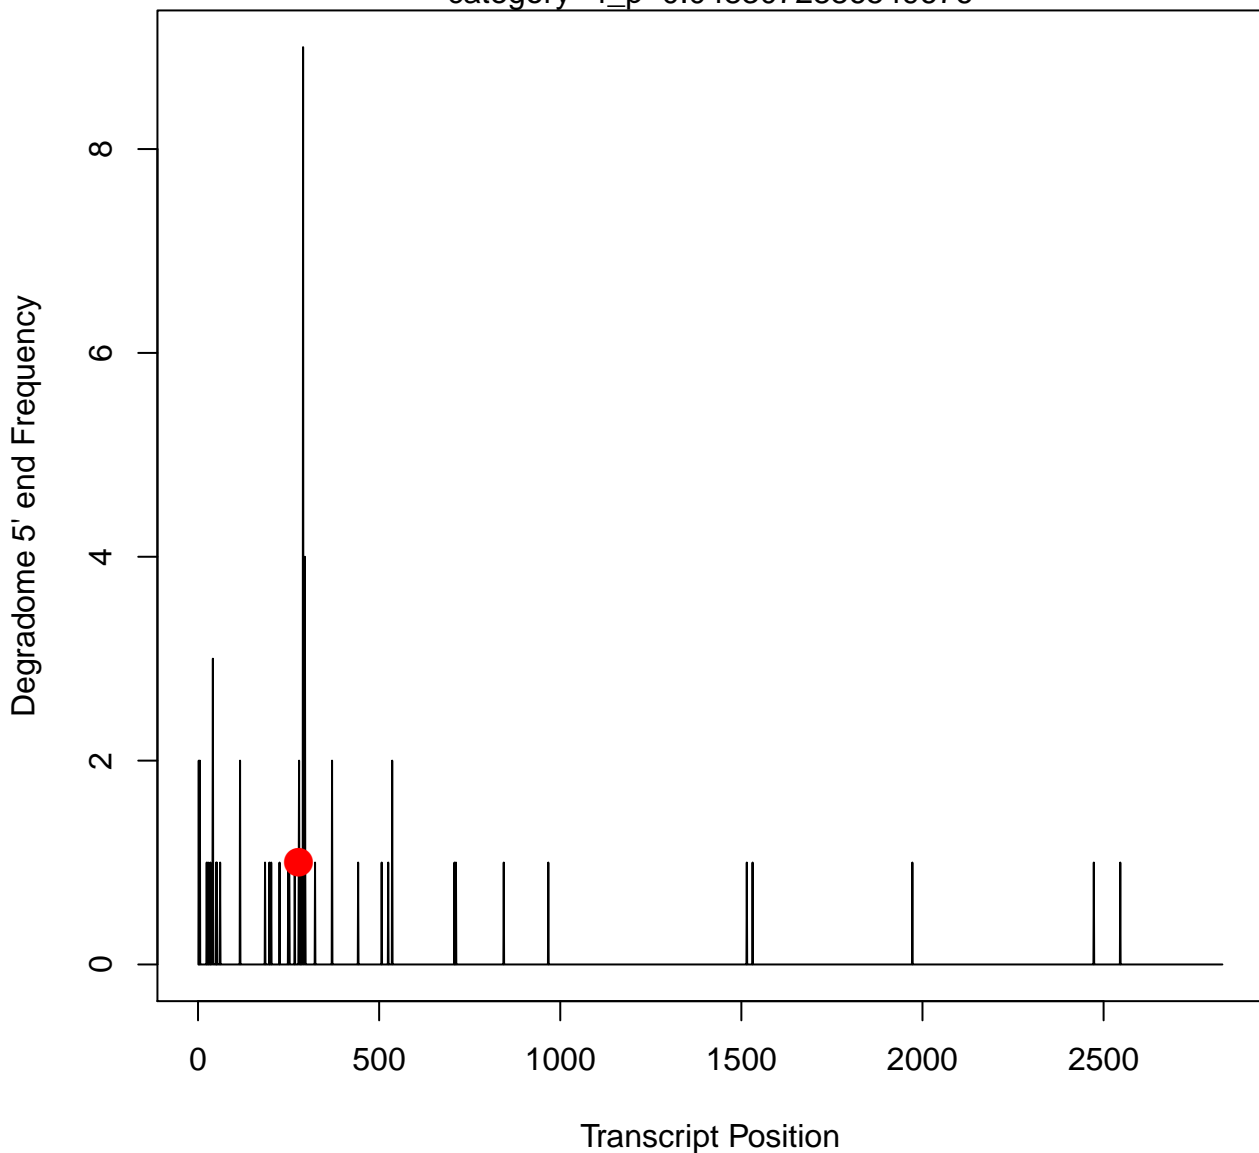

Supplement: s1 [file s1]

**T=Cluster-18410.74645\_Q=novel\_65\_S=399**

category=0\_p=0.000547104903662499

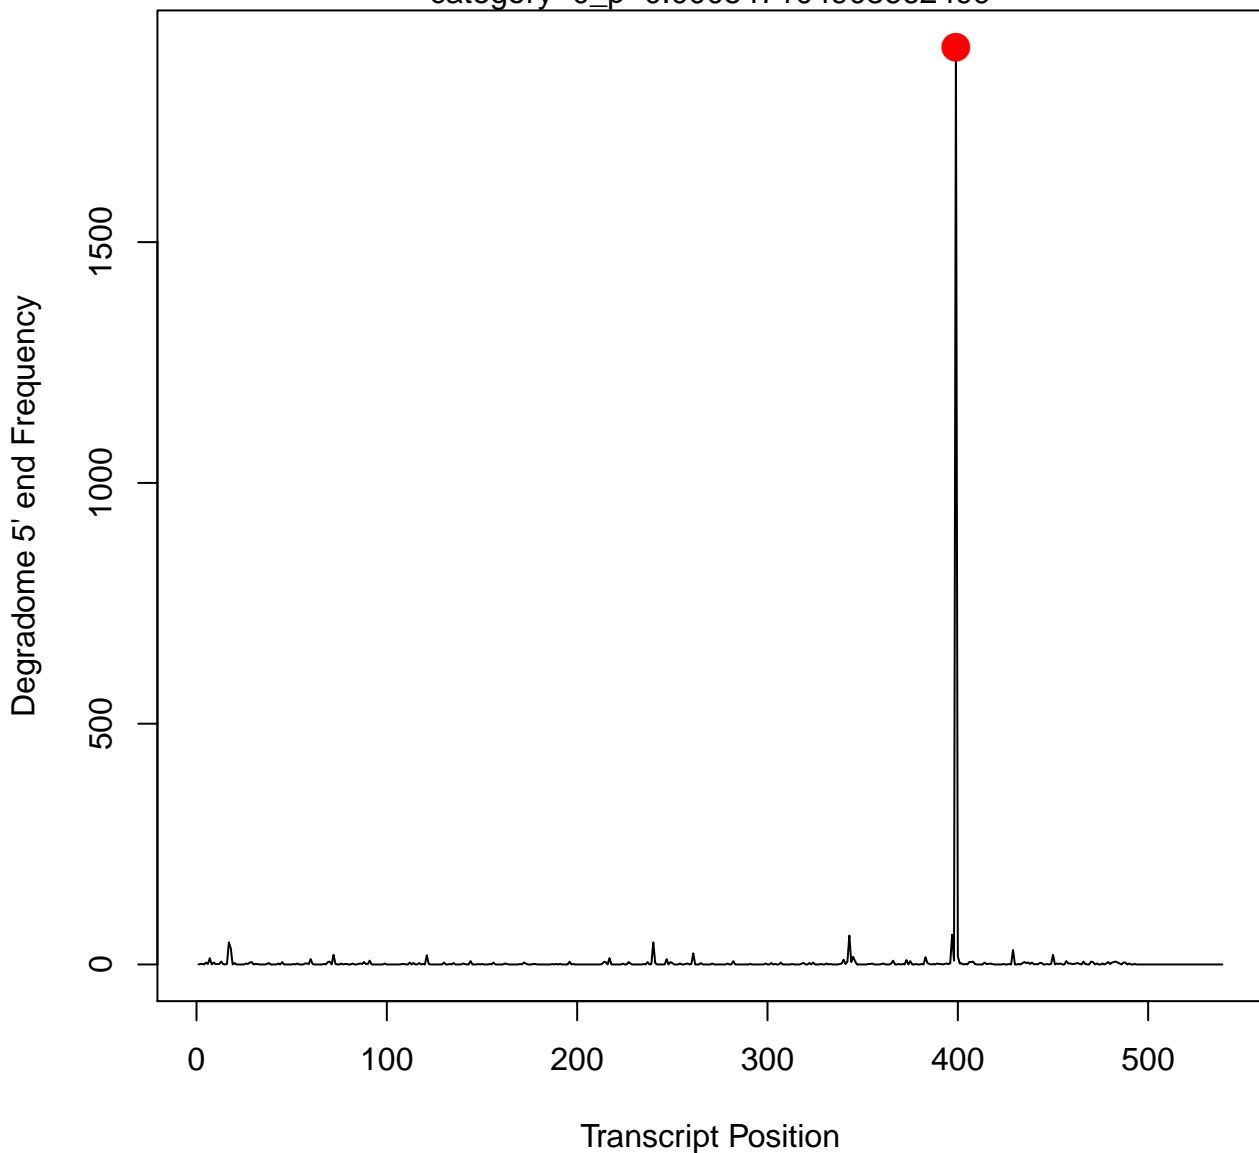

Supplement: s1 [file s1]

**T=Cluster-18410.105879\_Q=novel\_159\_S=479**

category=0\_p=0.00300537520191857

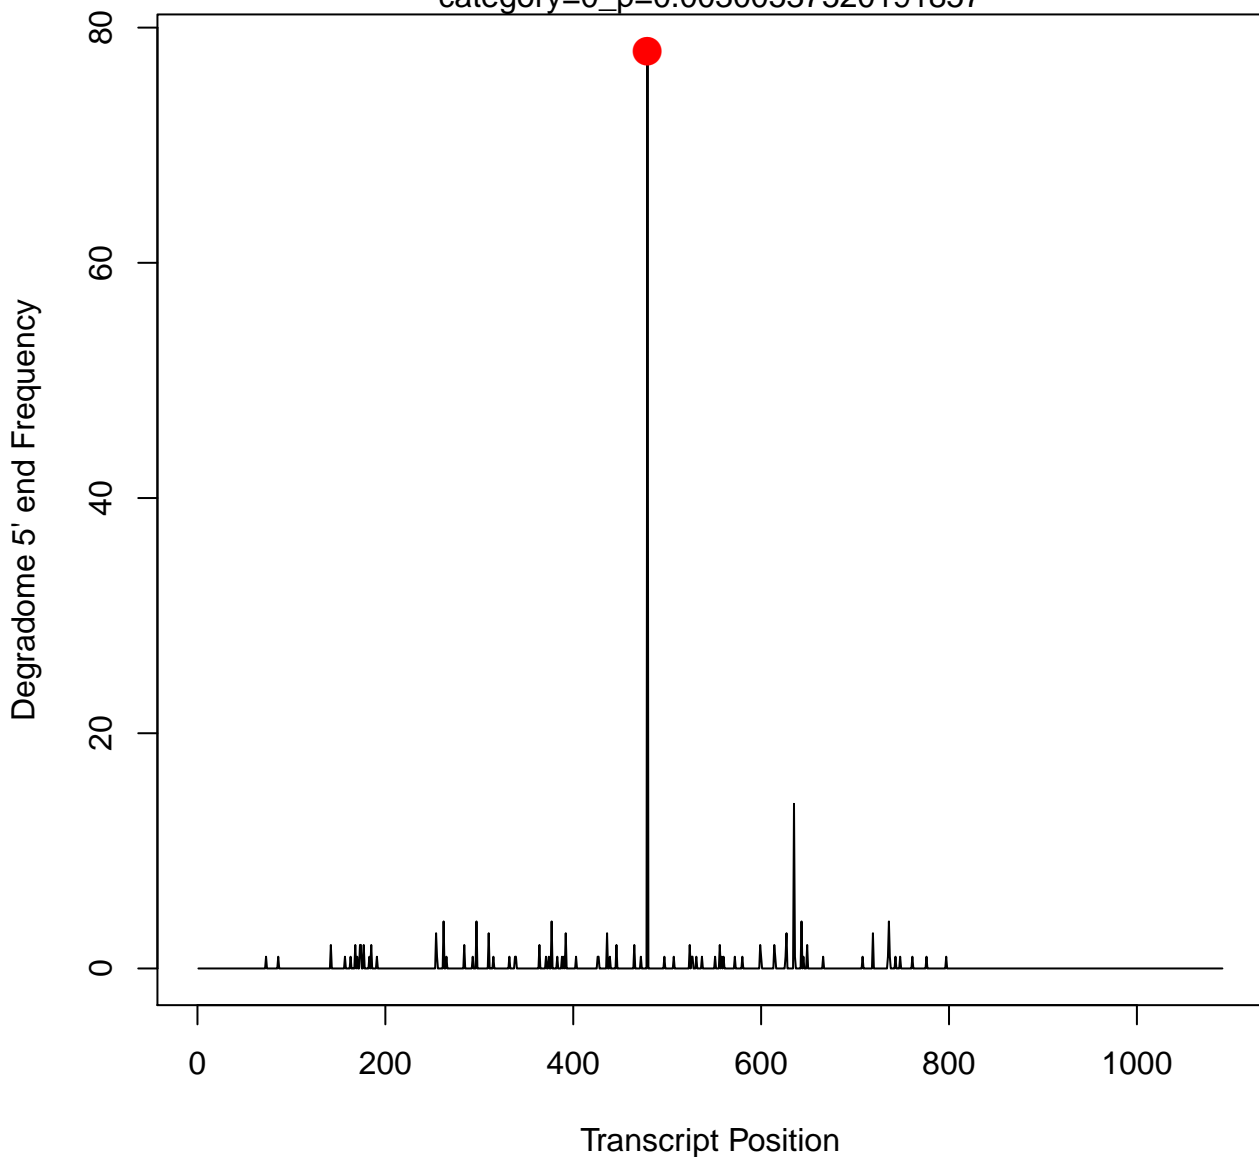

Supplement: s1 [file s1]

**T=Cluster-18410.75829\_Q=novel\_67\_S=102**

category=2\_p=0.0342485307007228

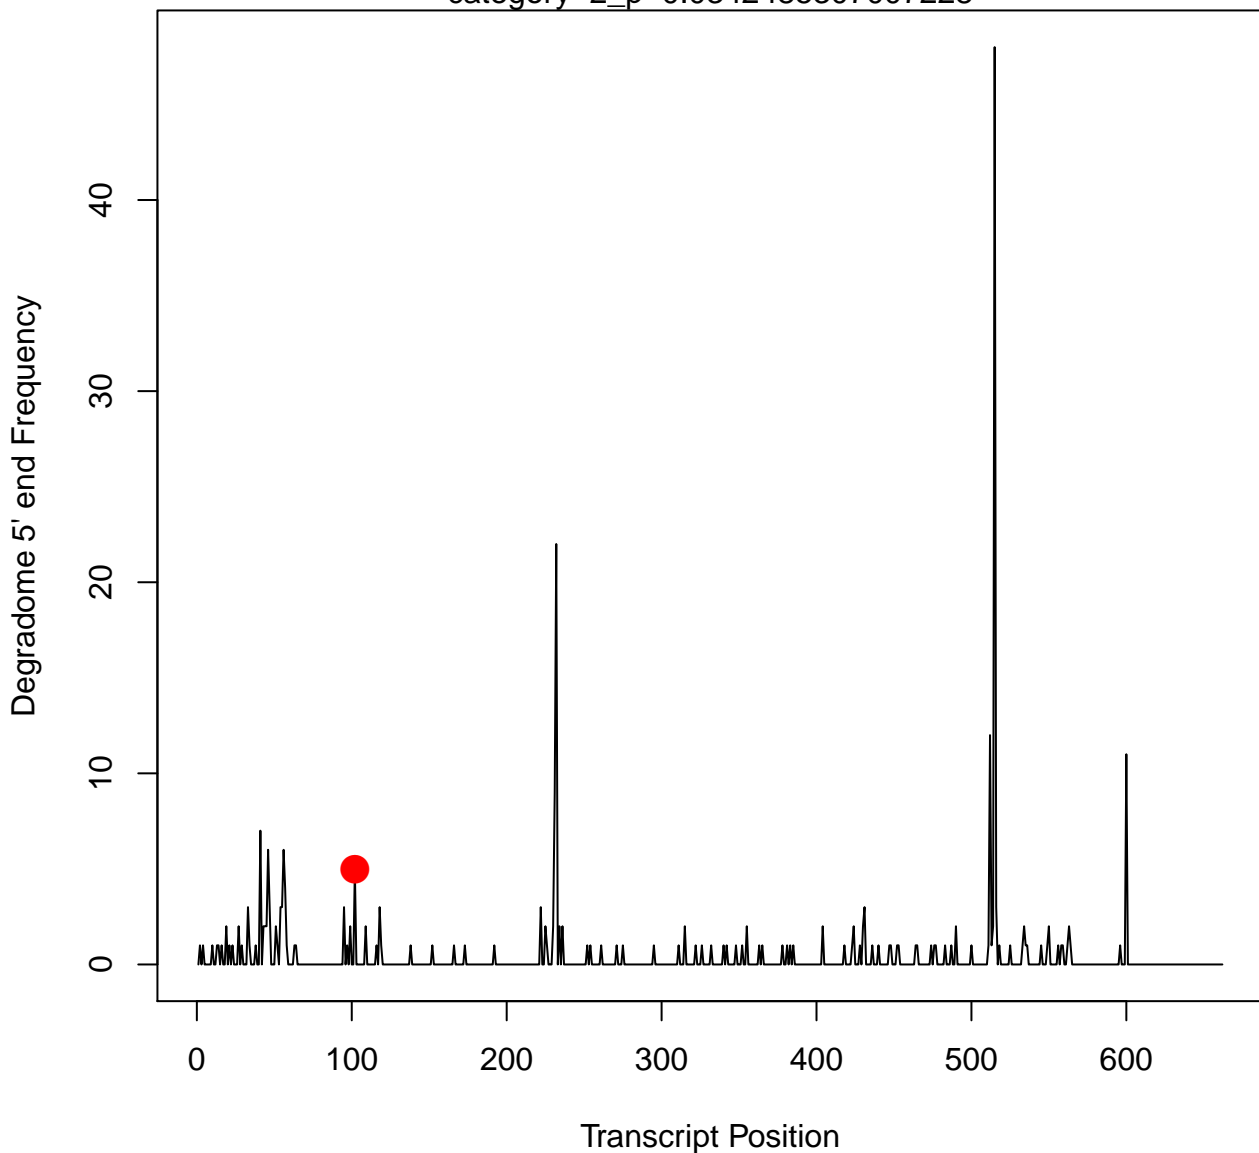

Supplement: s1 [file s1]

**T=Cluster-18410.96032\_Q=novel\_35\_S=438**

category=0\_p=0.00382345425486719

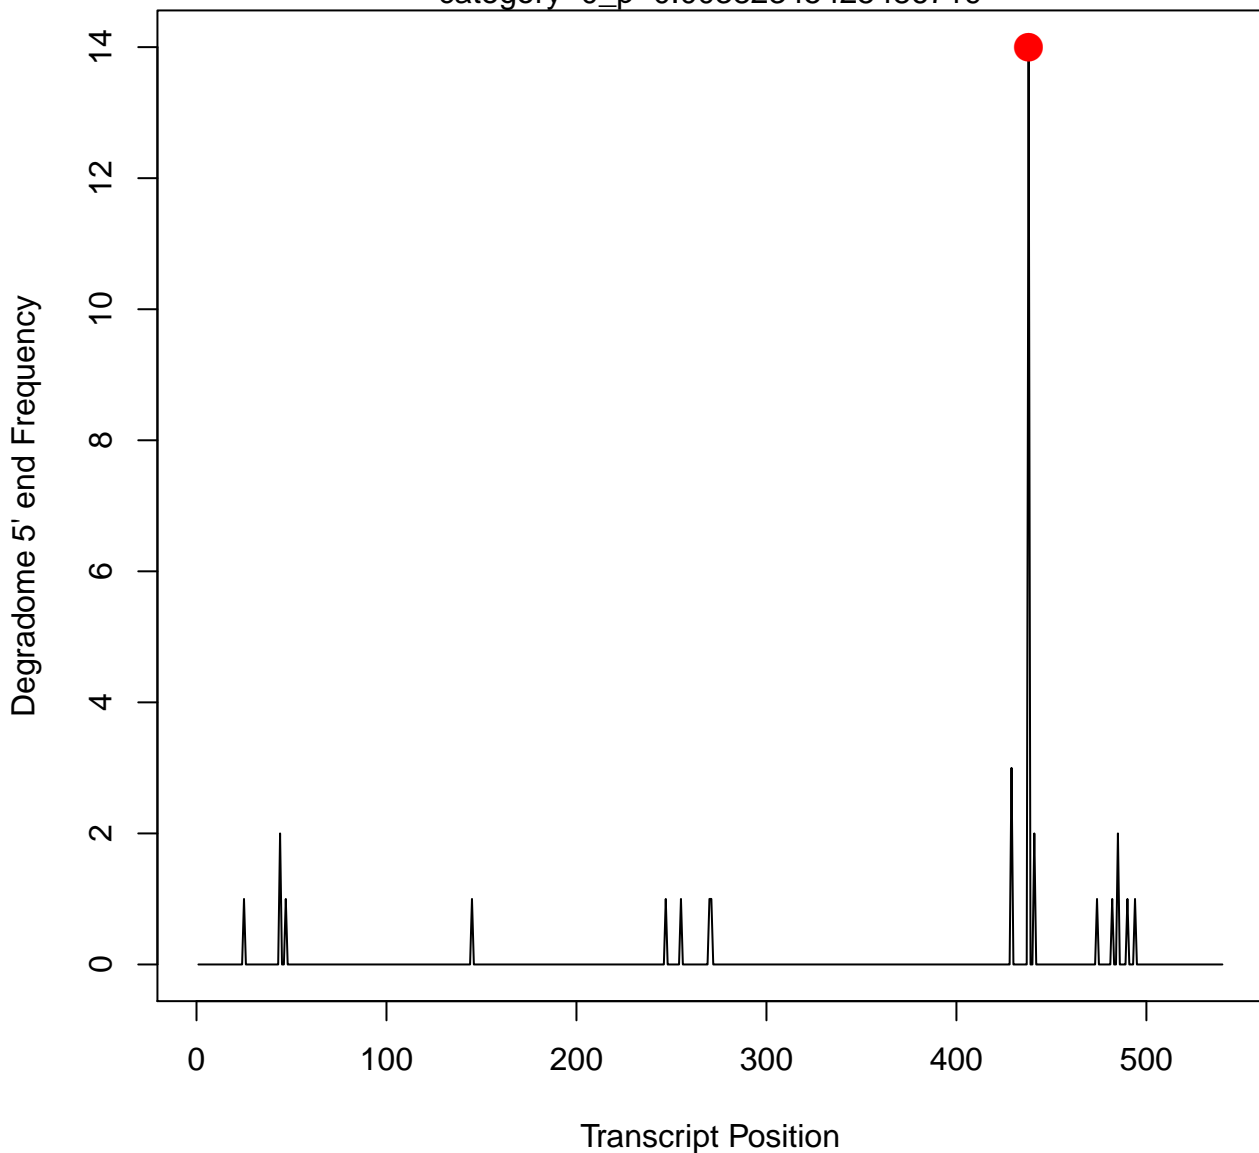

Supplement: s1 [file s1]

**T=Cluster-18410.31927\_Q=novel\_14\_S=1423**

category=0\_p=0.0040959980740275

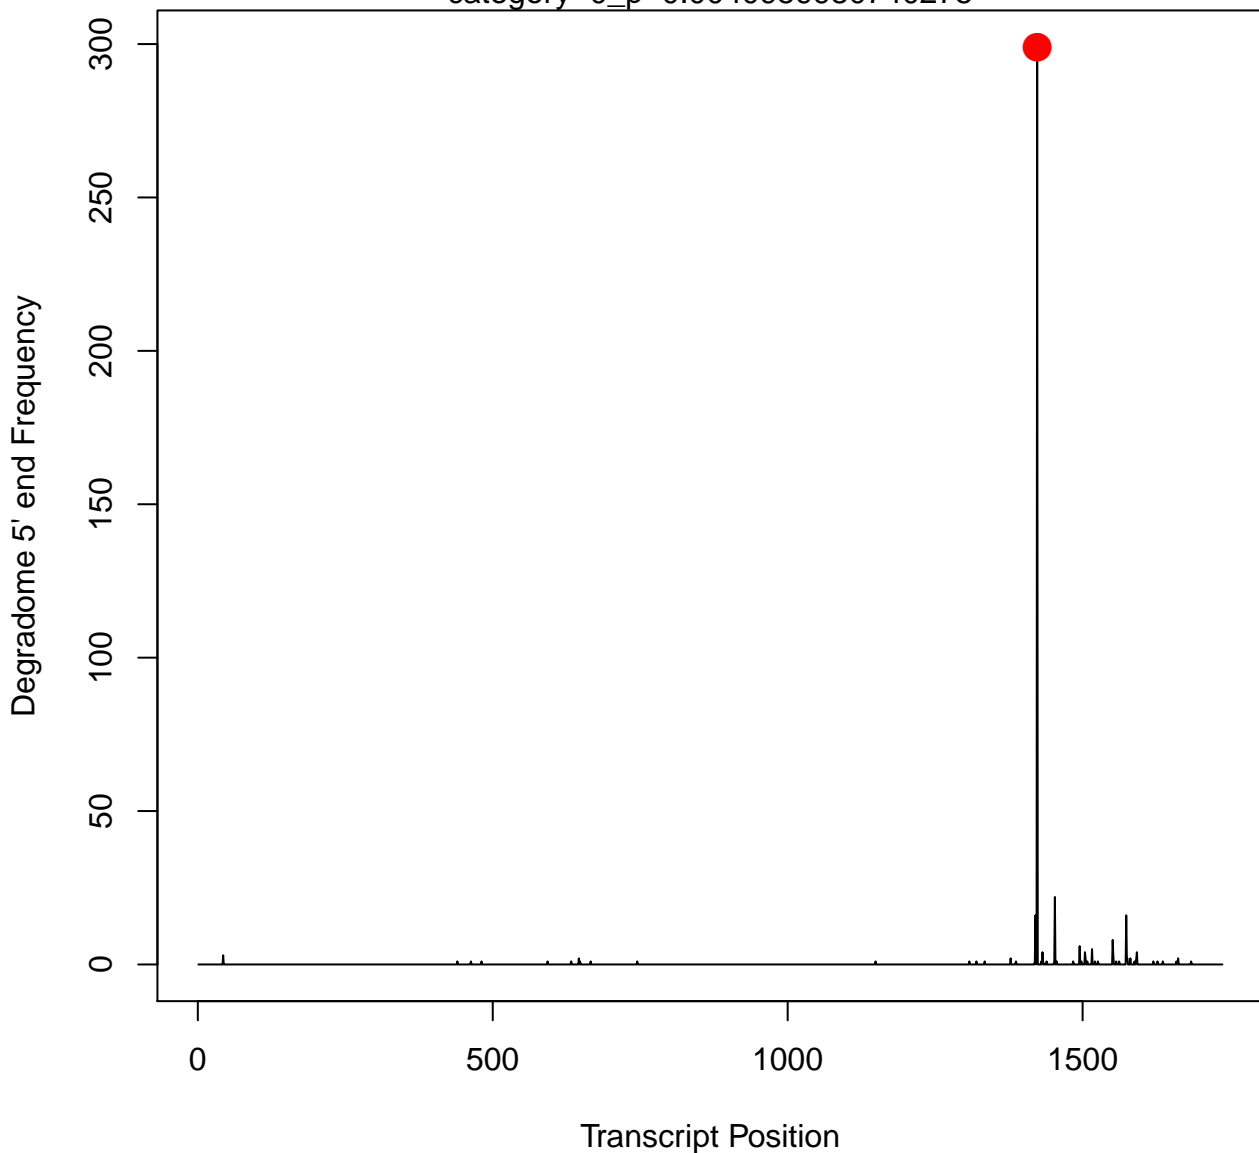

Supplement: s1 [file s1]

**T=Cluster-18410.18484\_Q=novel\_148\_S=144**

category=0\_p=0.00898905591083365

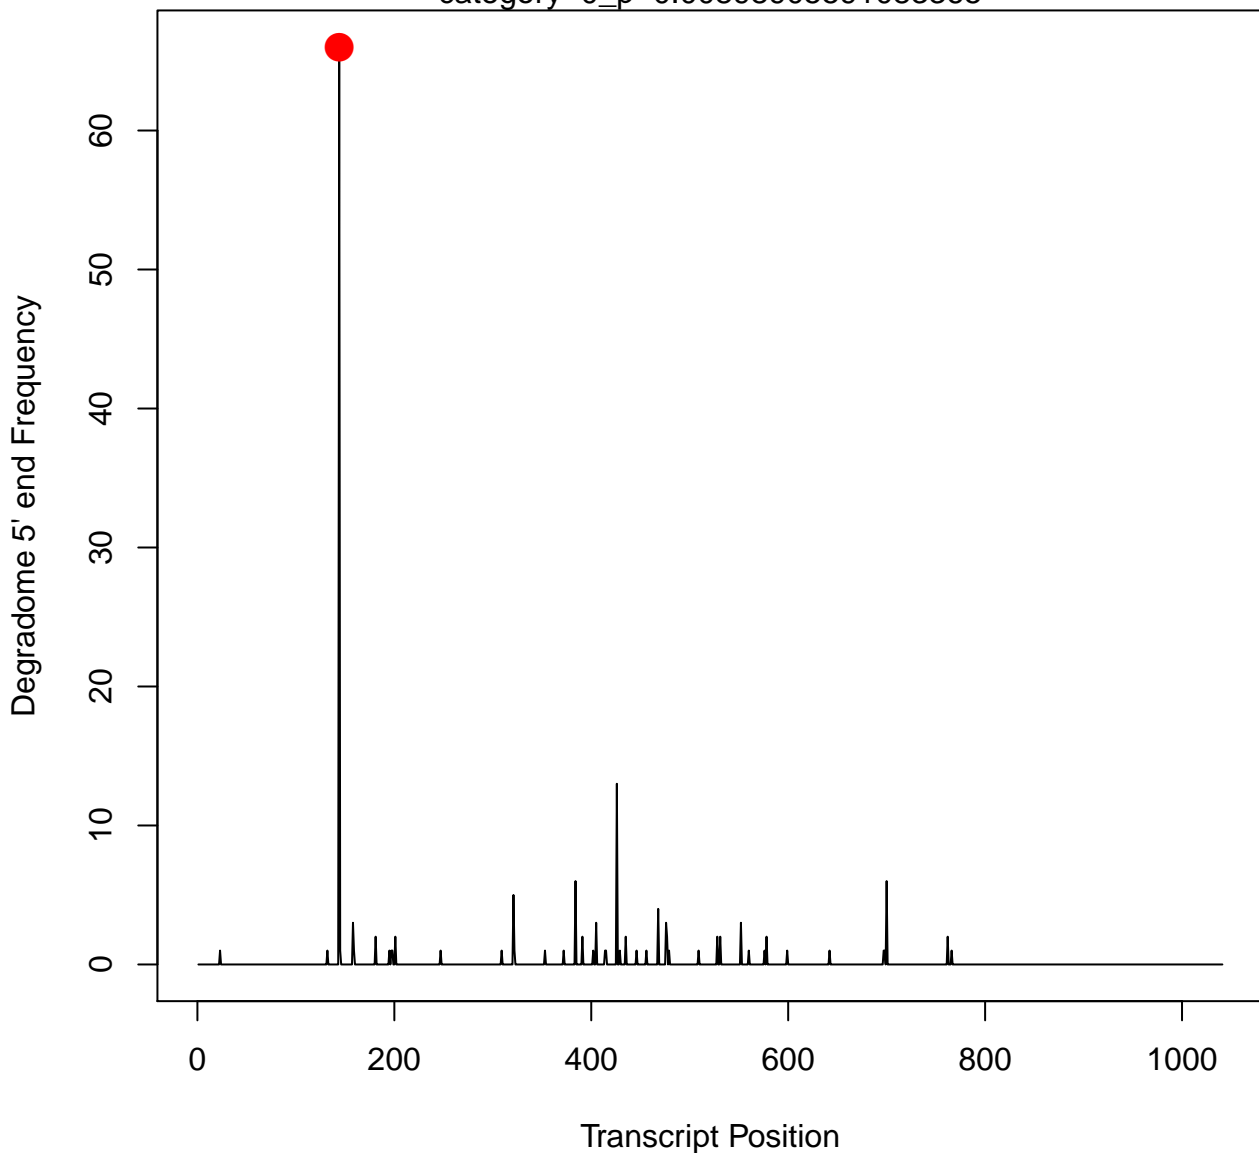

Supplement: s1 [file s1]

**T=Cluster-18410.32496\_Q=novel\_42\_S=208**

category=0\_p=0.00708906326490744

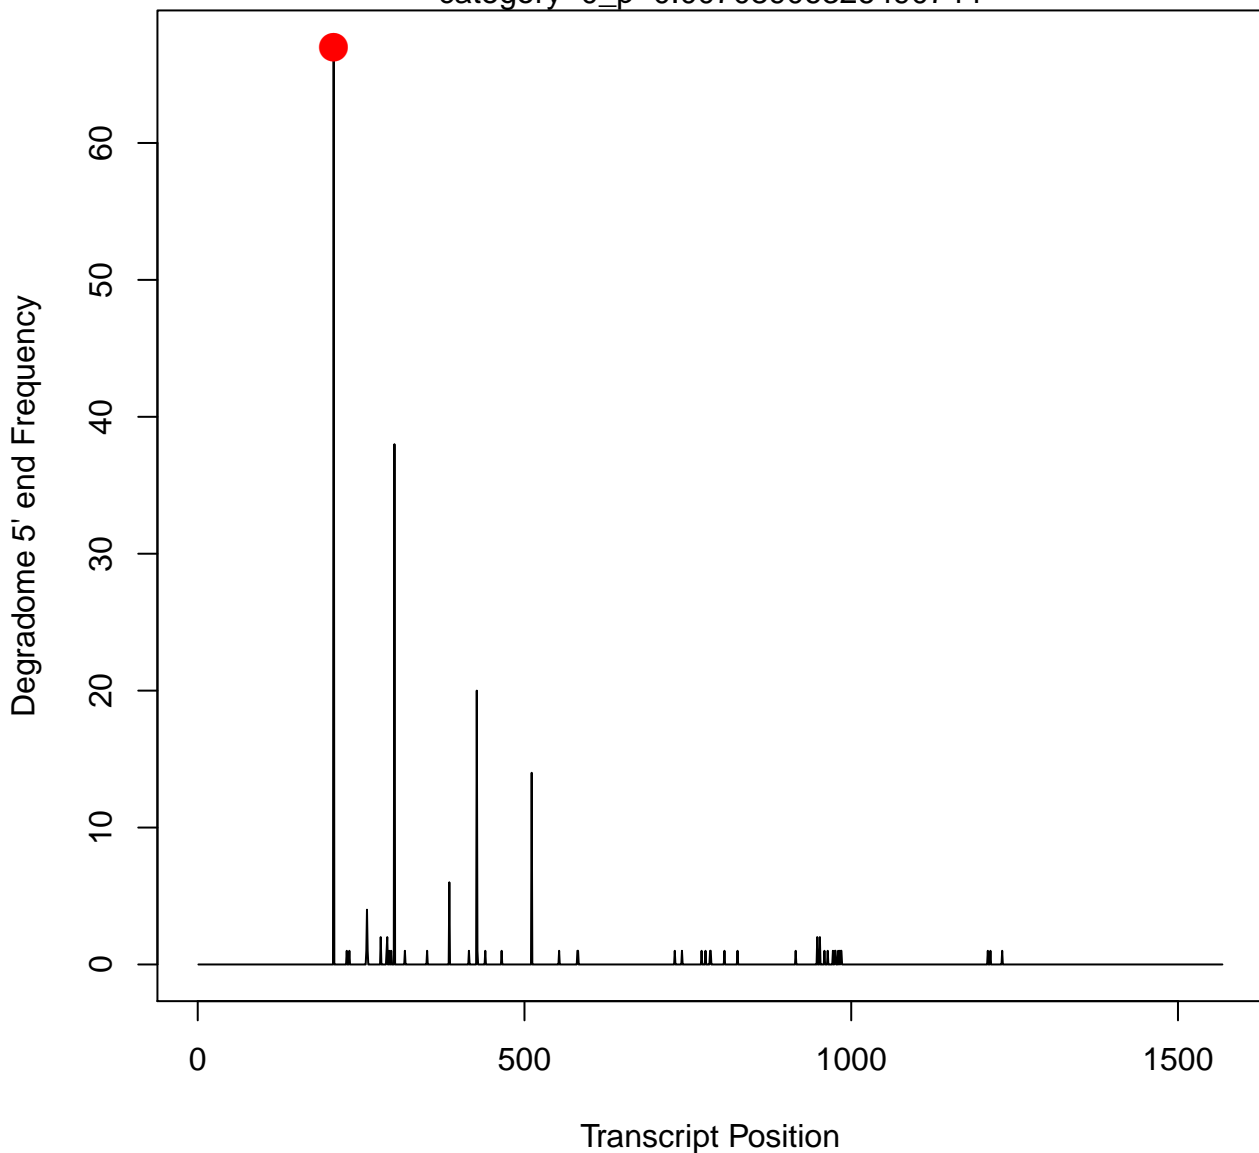

Supplement: s1 [file s1]

**T=Cluster-18410.93405\_Q=novel\_67\_S=66**

category=3\_p=0.093081058041071

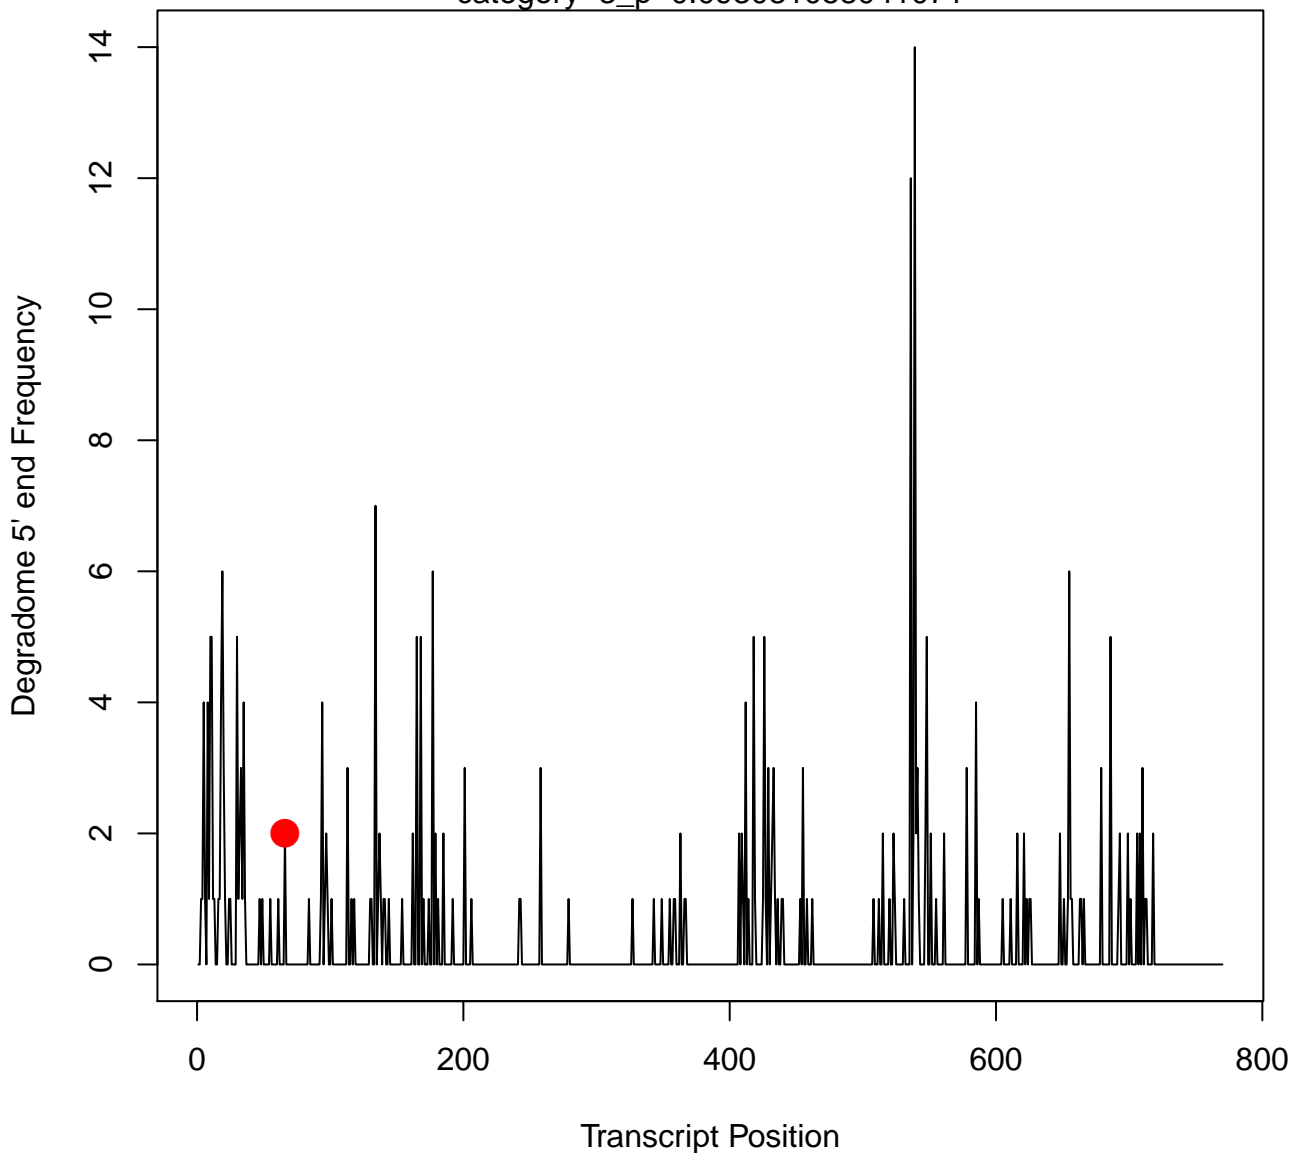

Supplement: s1 [file s1]

**T=Cluster-18410.37830\_Q=novel\_2\_S=38**

category=2\_p=0.0673240995462872

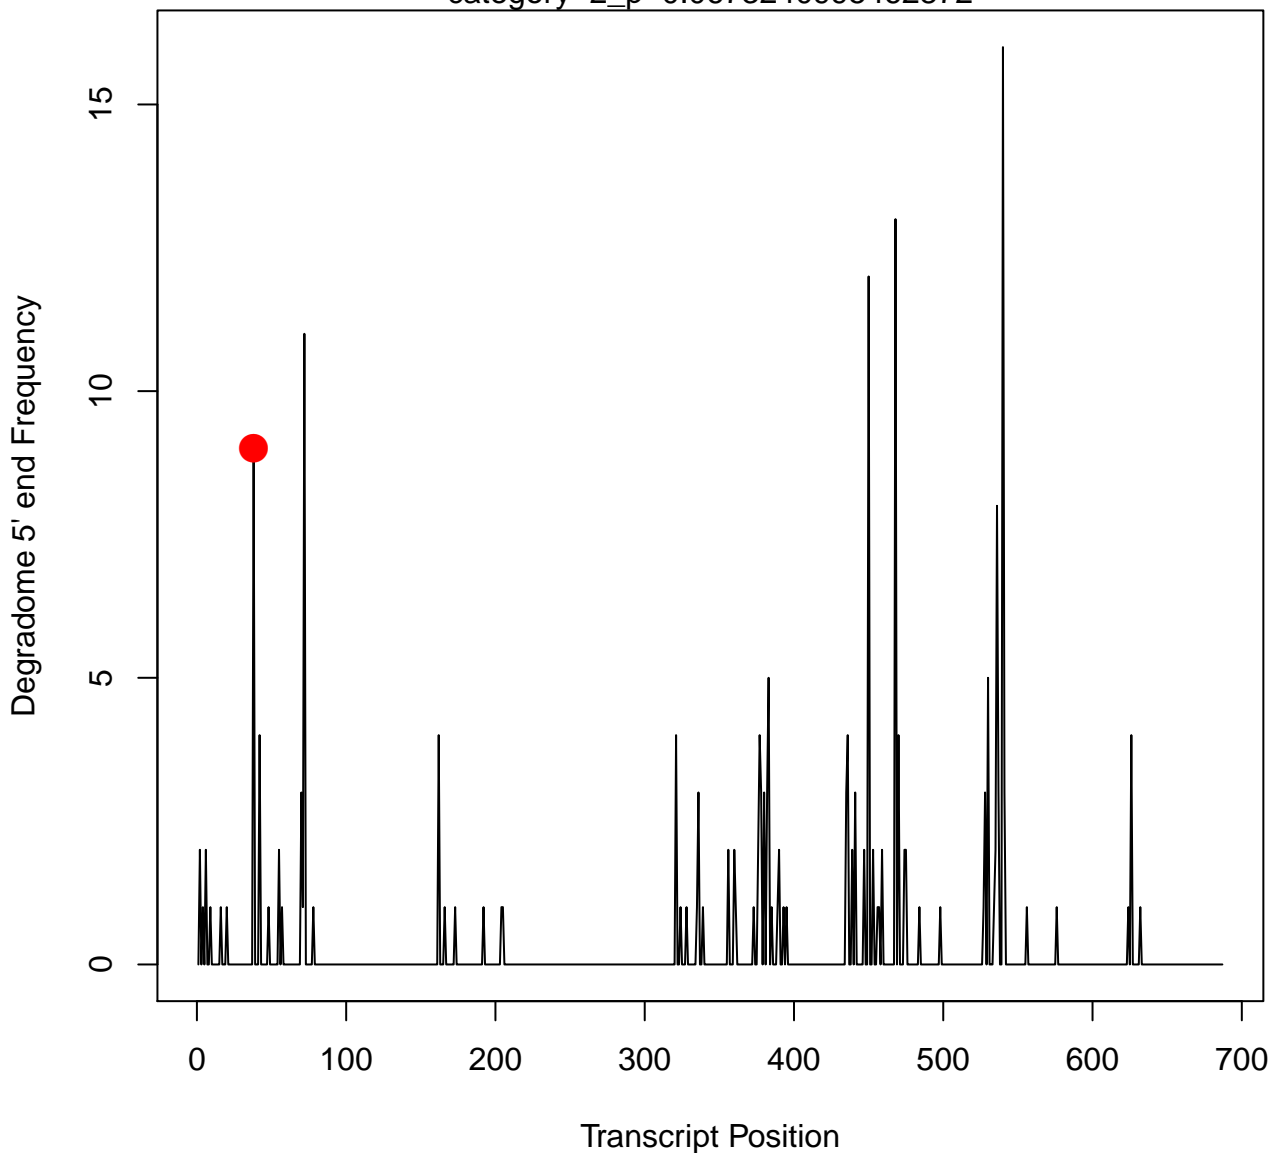

Supplement: s1 [file s1]

**T=Cluster-18410.28951\_Q=novel\_90\_S=3108**

category=0\_p=0.00273253291772324

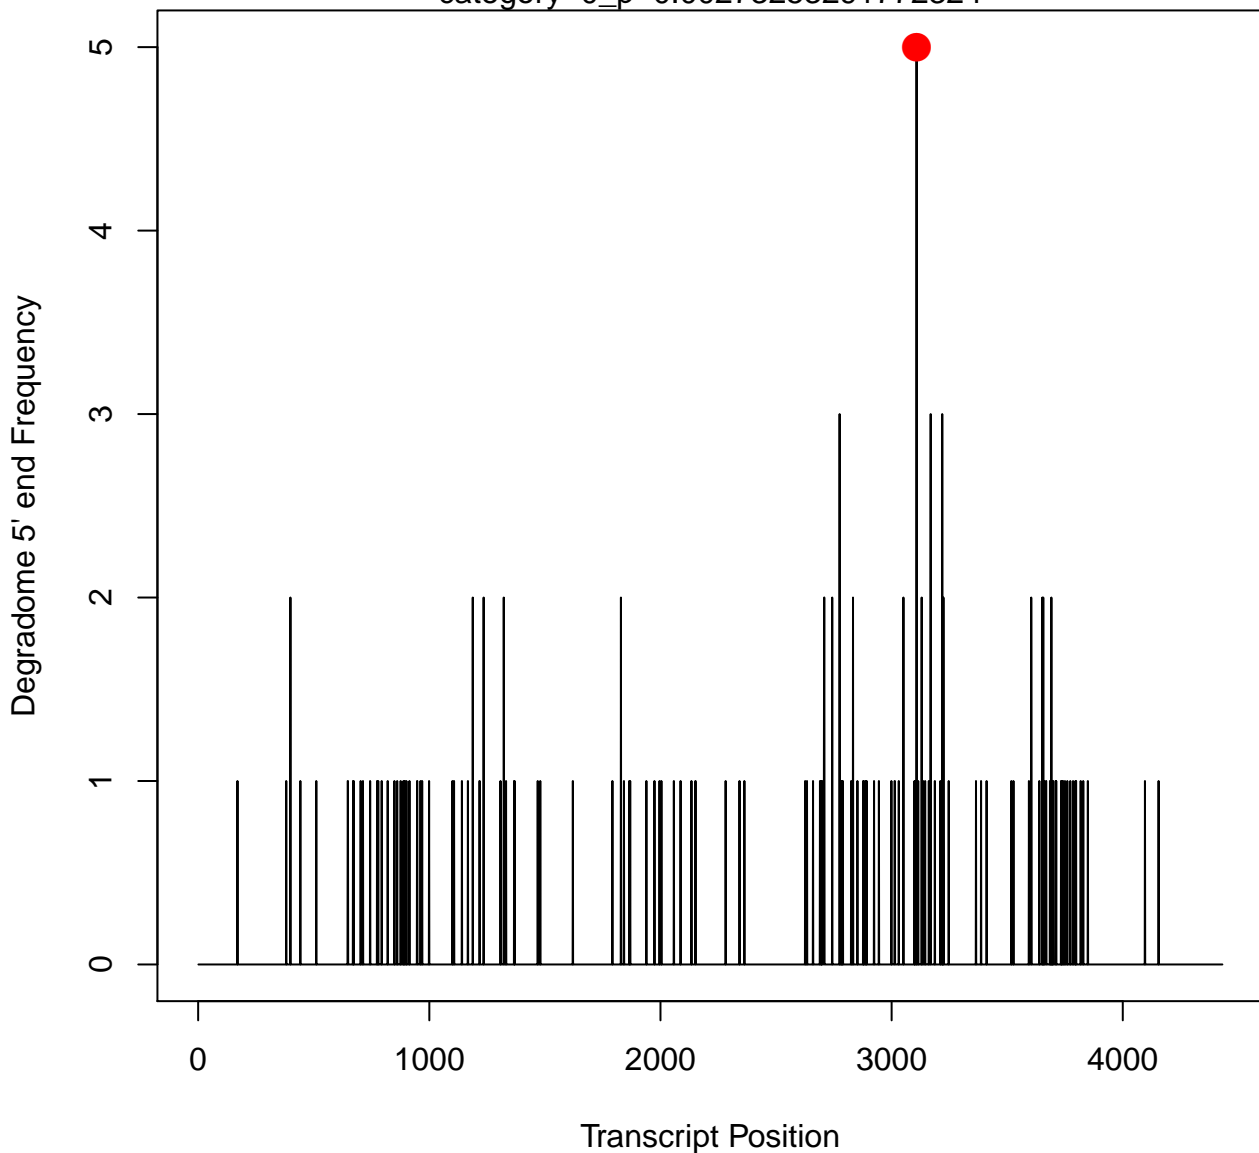

Supplement: s1 [file s1]

**T=Cluster-18410.79521\_Q=novel\_168\_S=998**

category=0\_p=0.0315073597432549

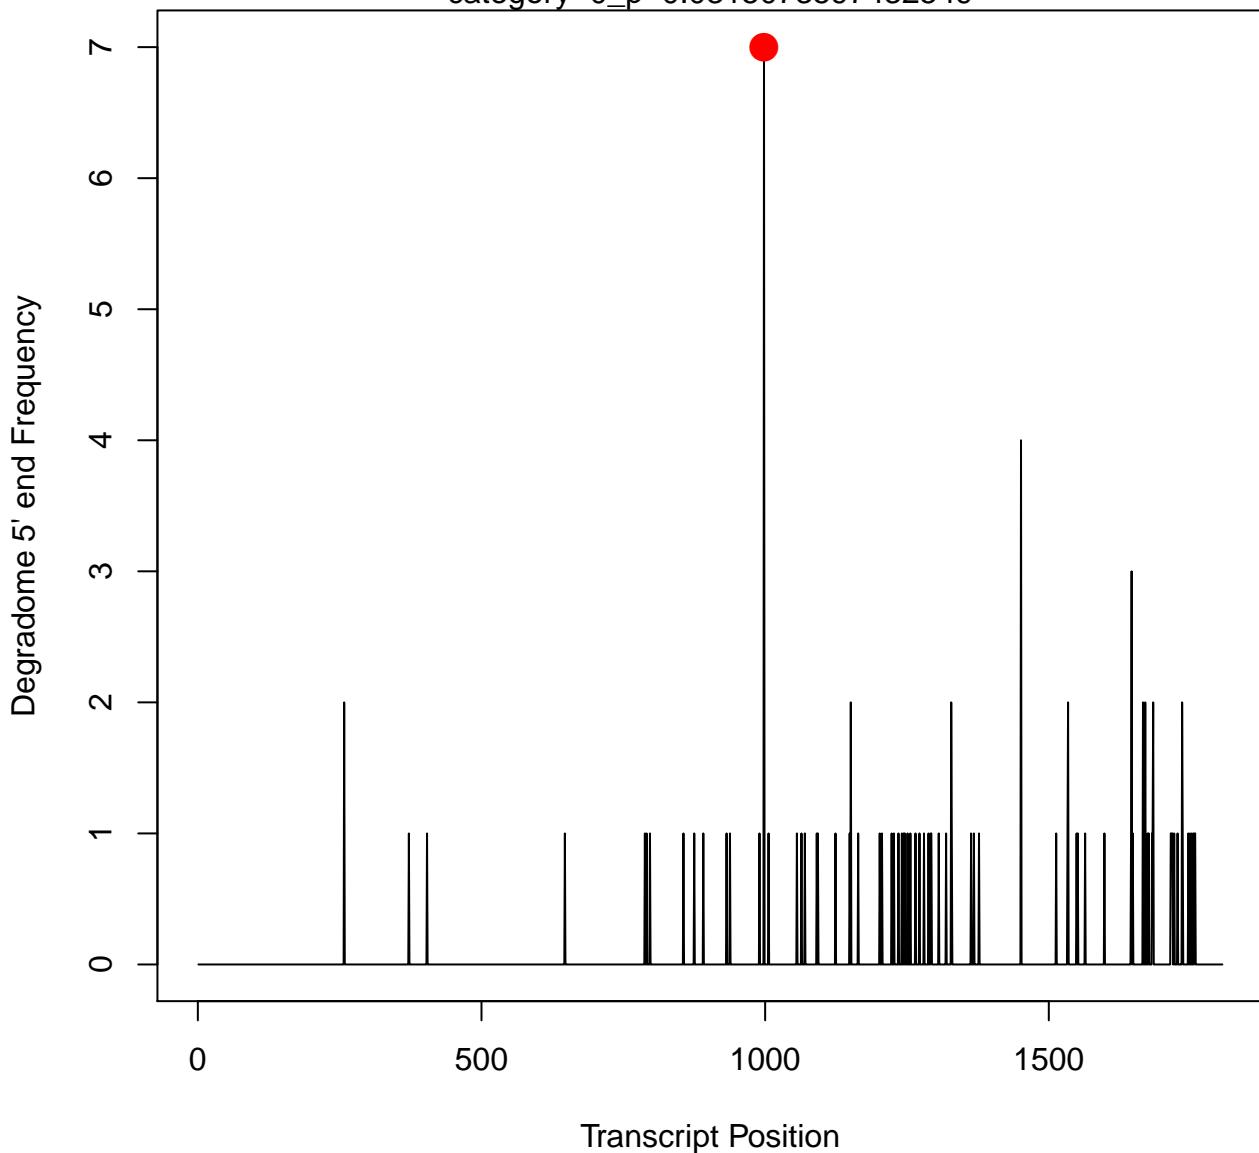

Supplement: s1 [file s1]

**T=Cluster-18410.12867\_Q=novel\_172\_S=364**

category=0\_p=0.00464086203705827

Degradome 5' end Frequency

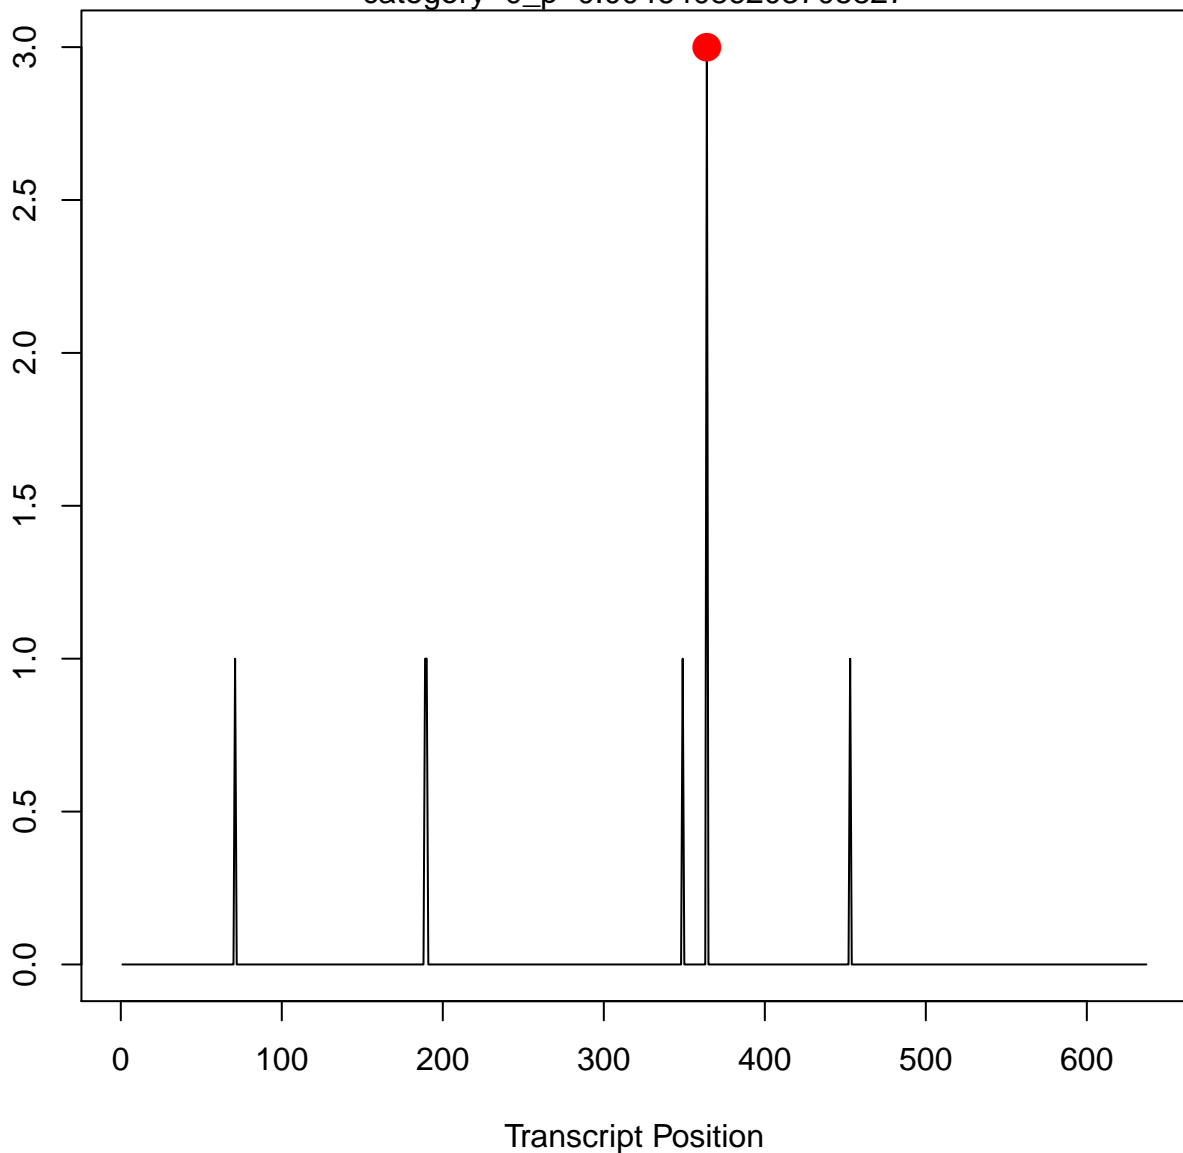

Supplement: s1 [file s1]

**T=Cluster-18410.73208\_Q=novel\_42\_S=1392**

category=0\_p=0.00273253291772324

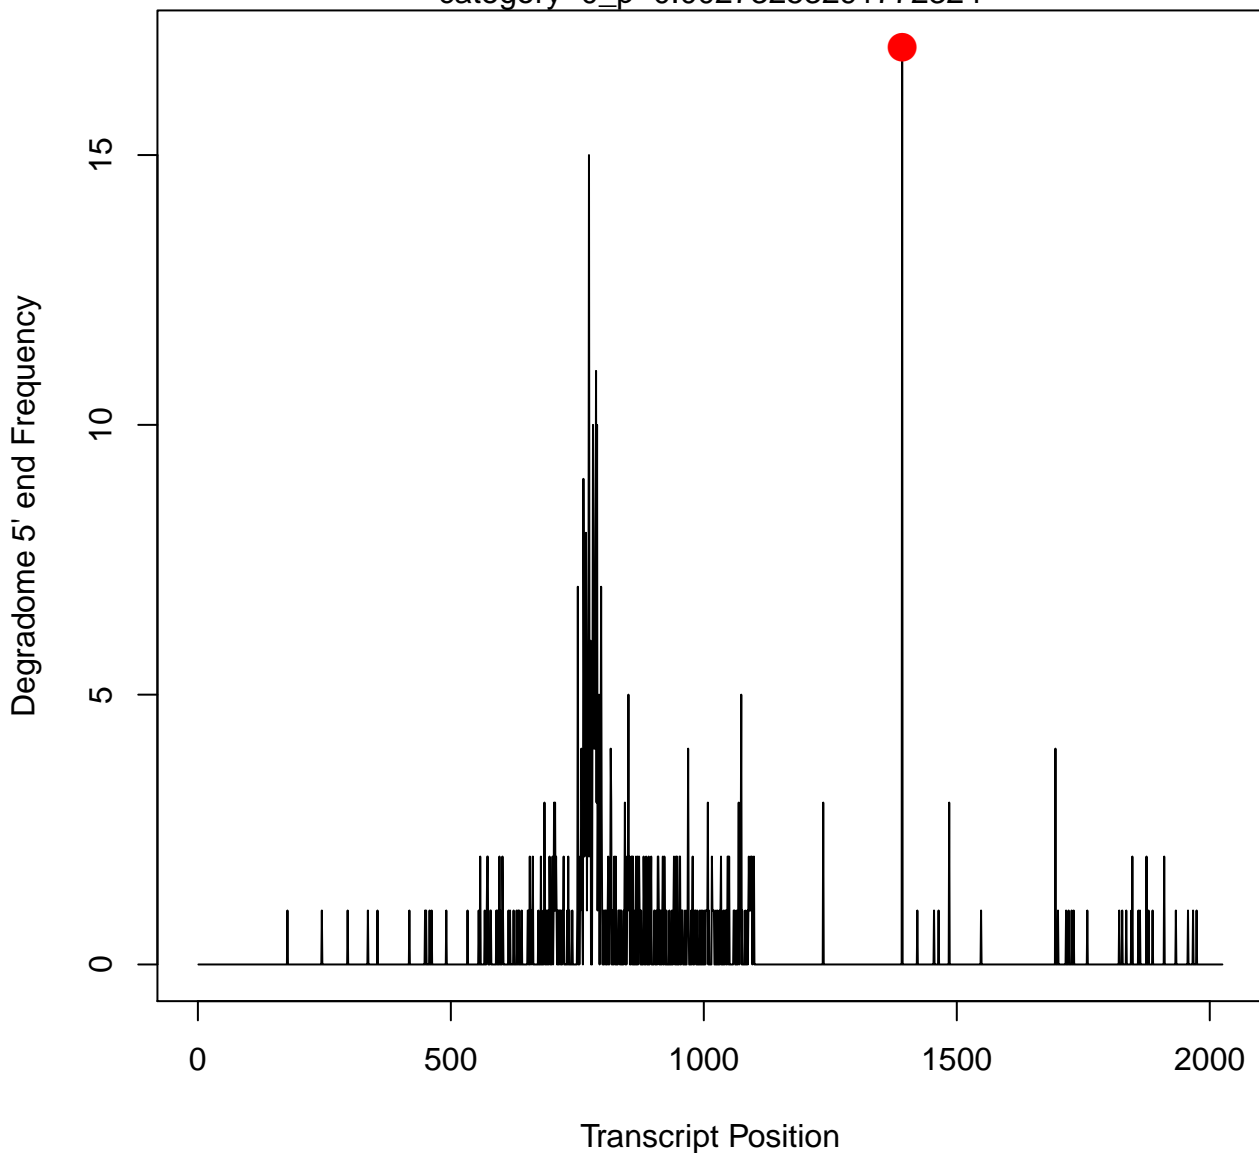

Supplement: s1 [file s1]

**T=Cluster-18410.117129\_Q=novel\_82\_S=505**

category=0\_p=0.0955436398534319

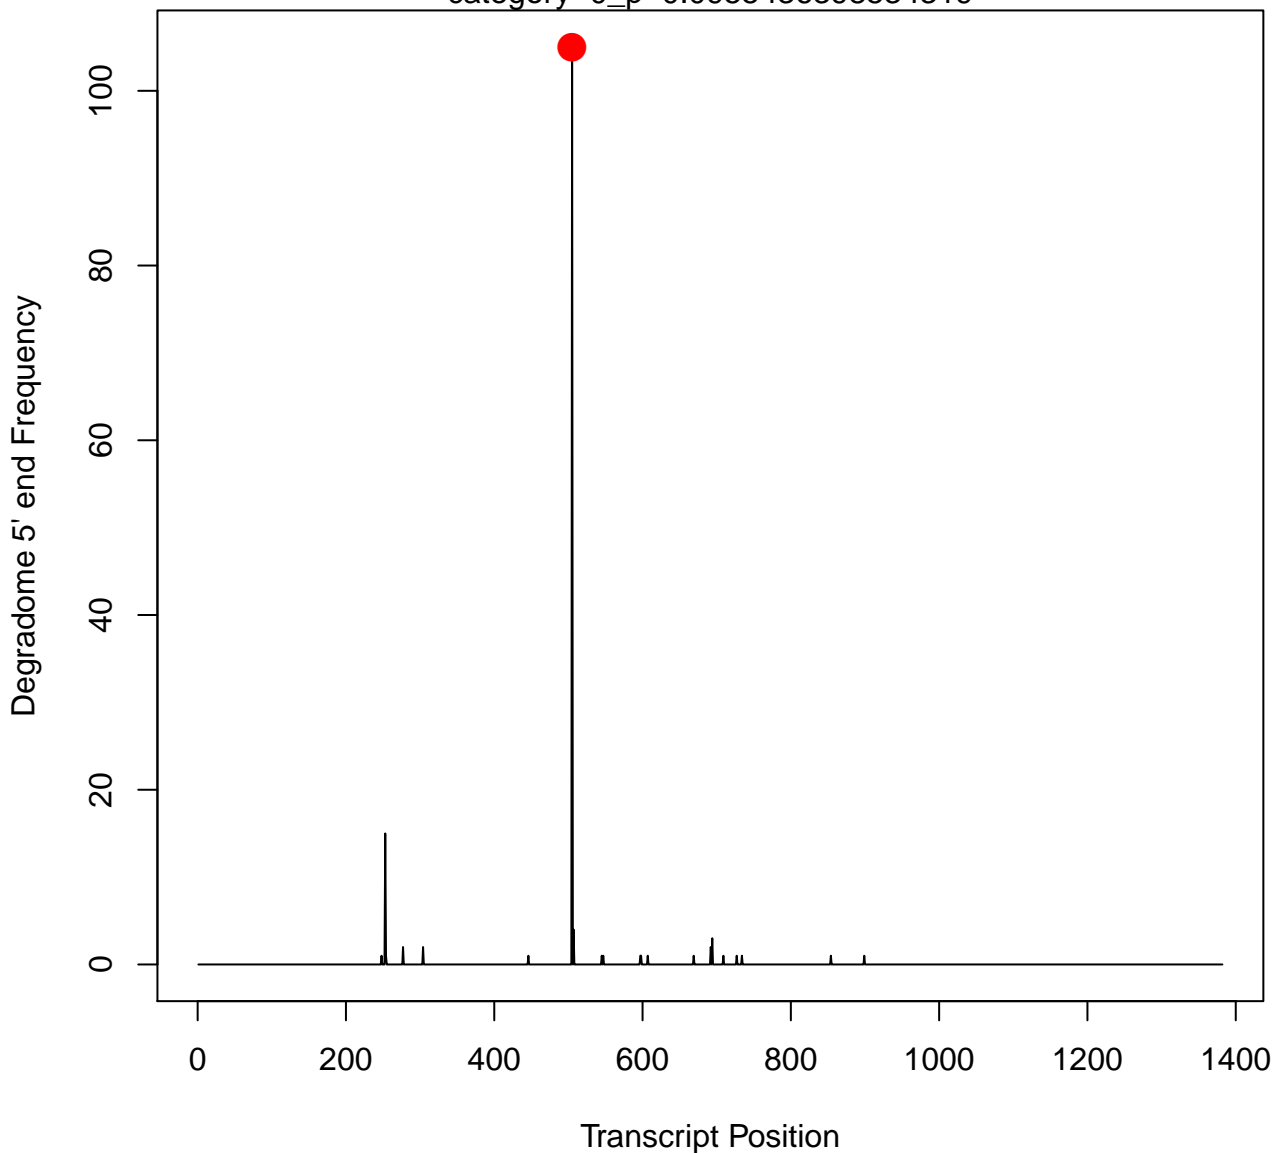

Supplement: s1 [file s1]

**T=Cluster-18410.65473\_Q=novel\_59\_S=302**

category=0\_p=0.0127781409216312

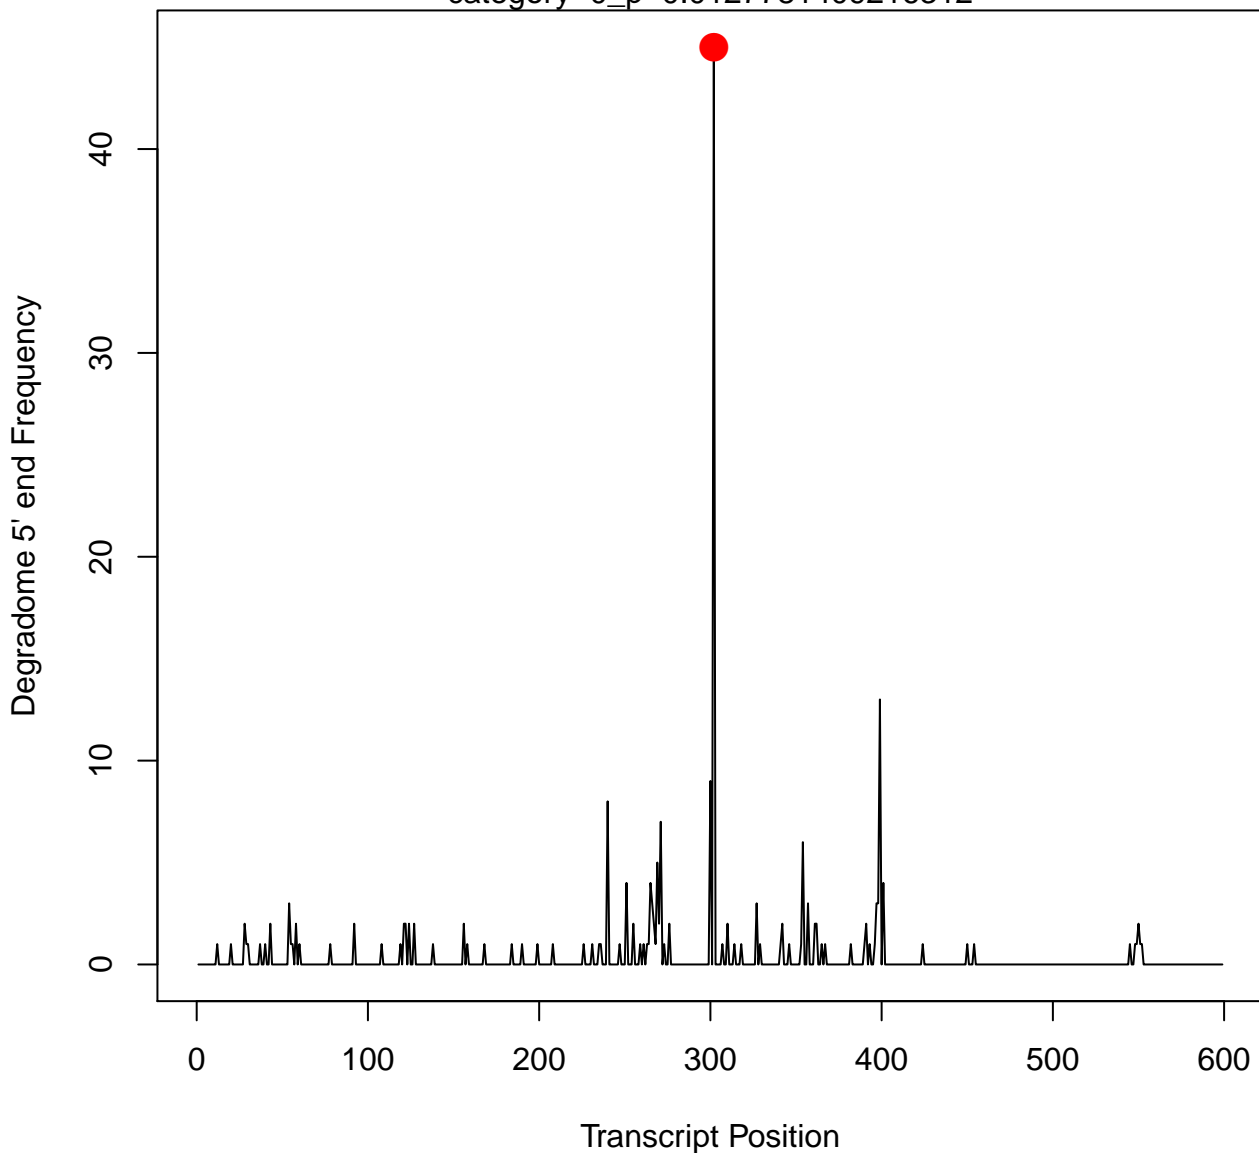

Supplement: s1 [file s1]

**T=Cluster-18410.13943\_Q=novel\_21\_S=1032**

category=0\_p=0.00245961596621247

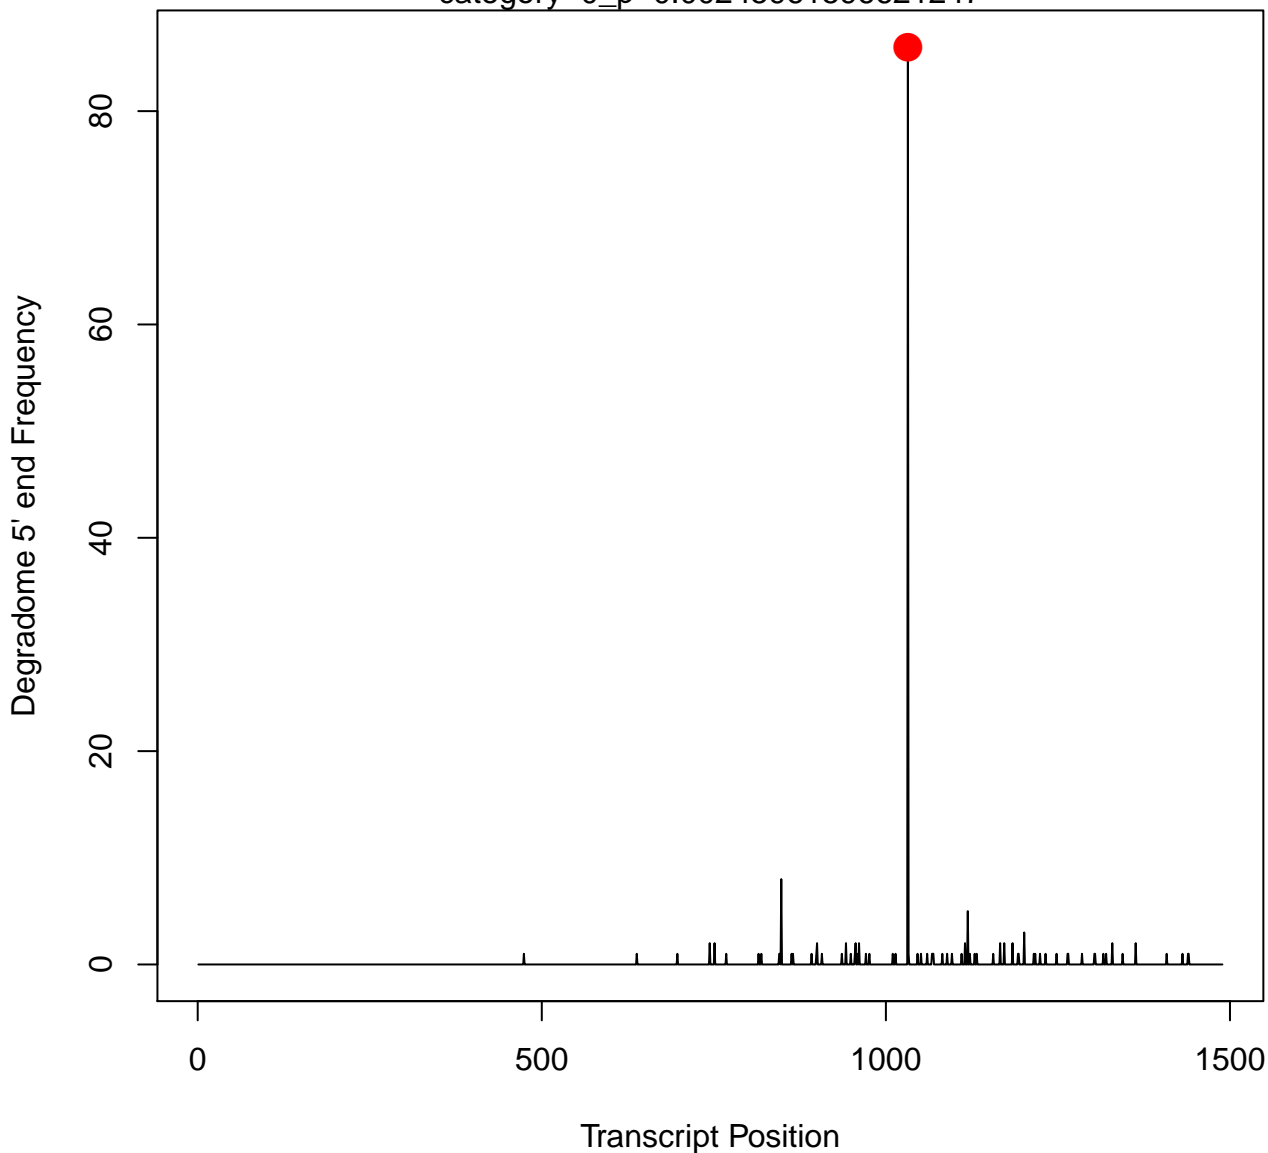

Supplement: s1 [file s1]

**T=Cluster-18410.41738\_Q=novel\_82\_S=256**

category=2\_p=0.0564267304887326

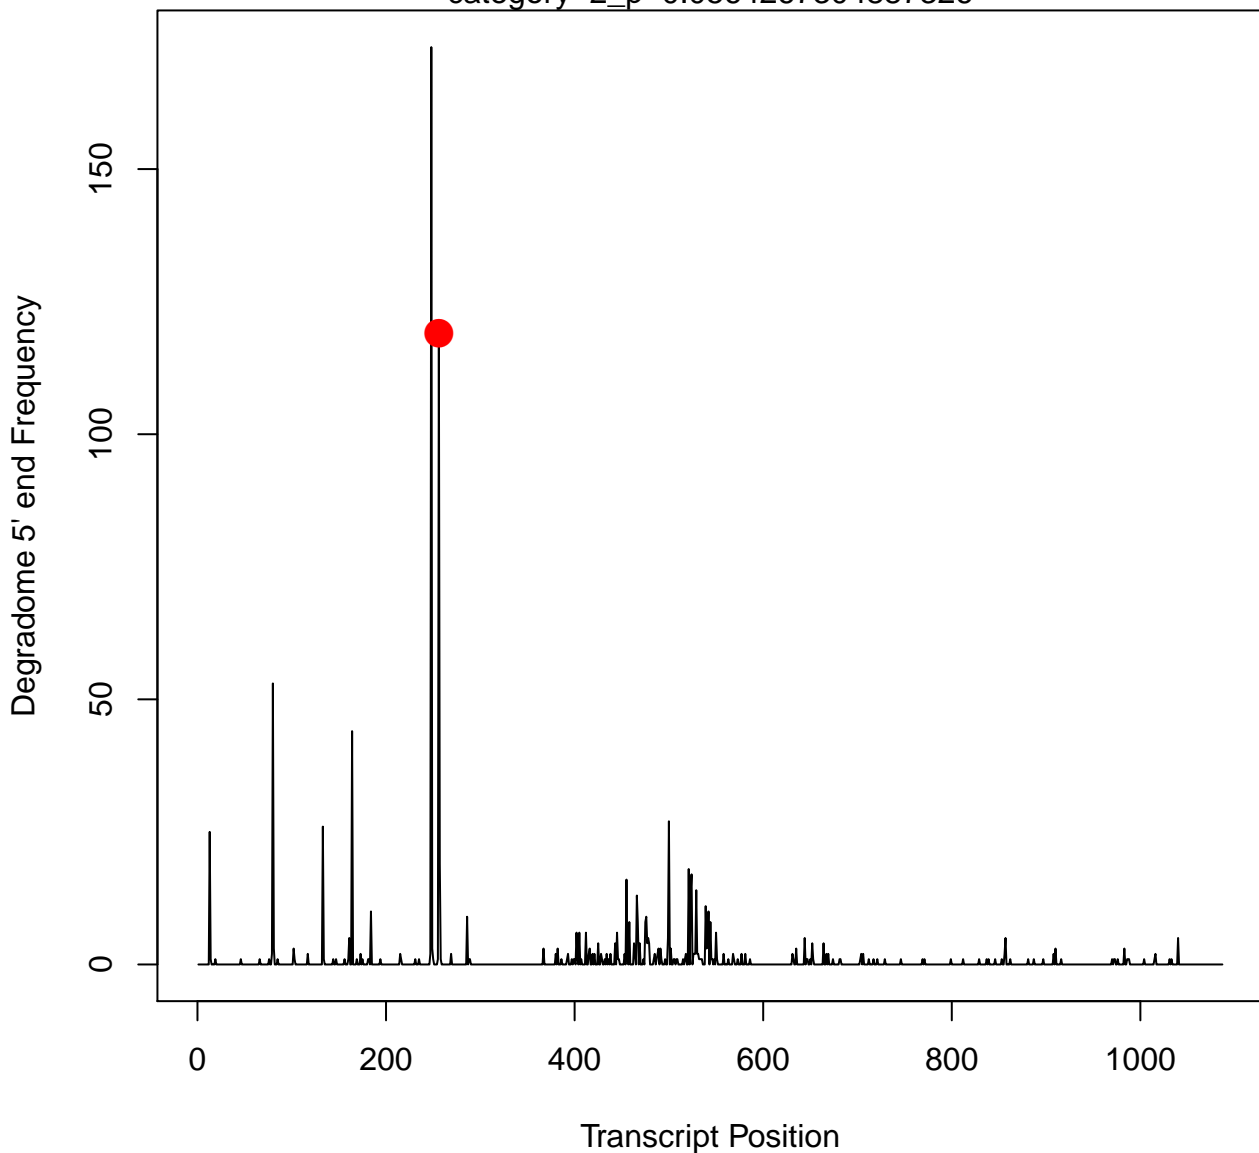

Supplement: s1 [file s1]

**T=Cluster-18410.30641\_Q=novel\_35\_S=497**

category=0\_p=0.0975213461331952

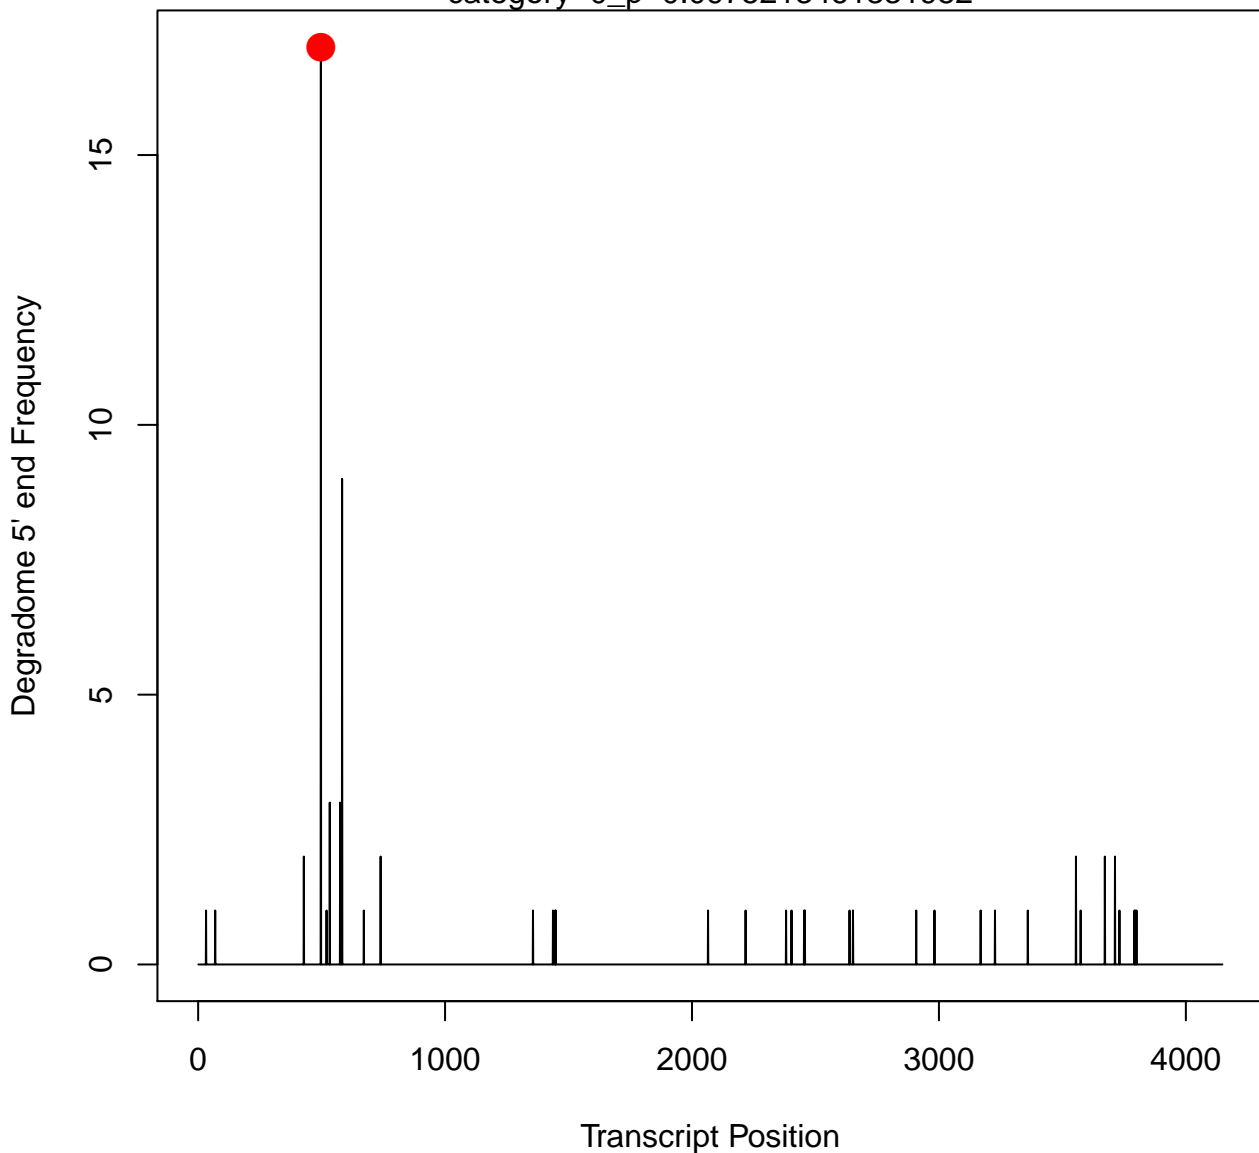

Supplement: s1 [file s1]

**T=Cluster-18410.39670\_Q=novel\_42\_S=1236**

category=0\_p=0.00300537520191857

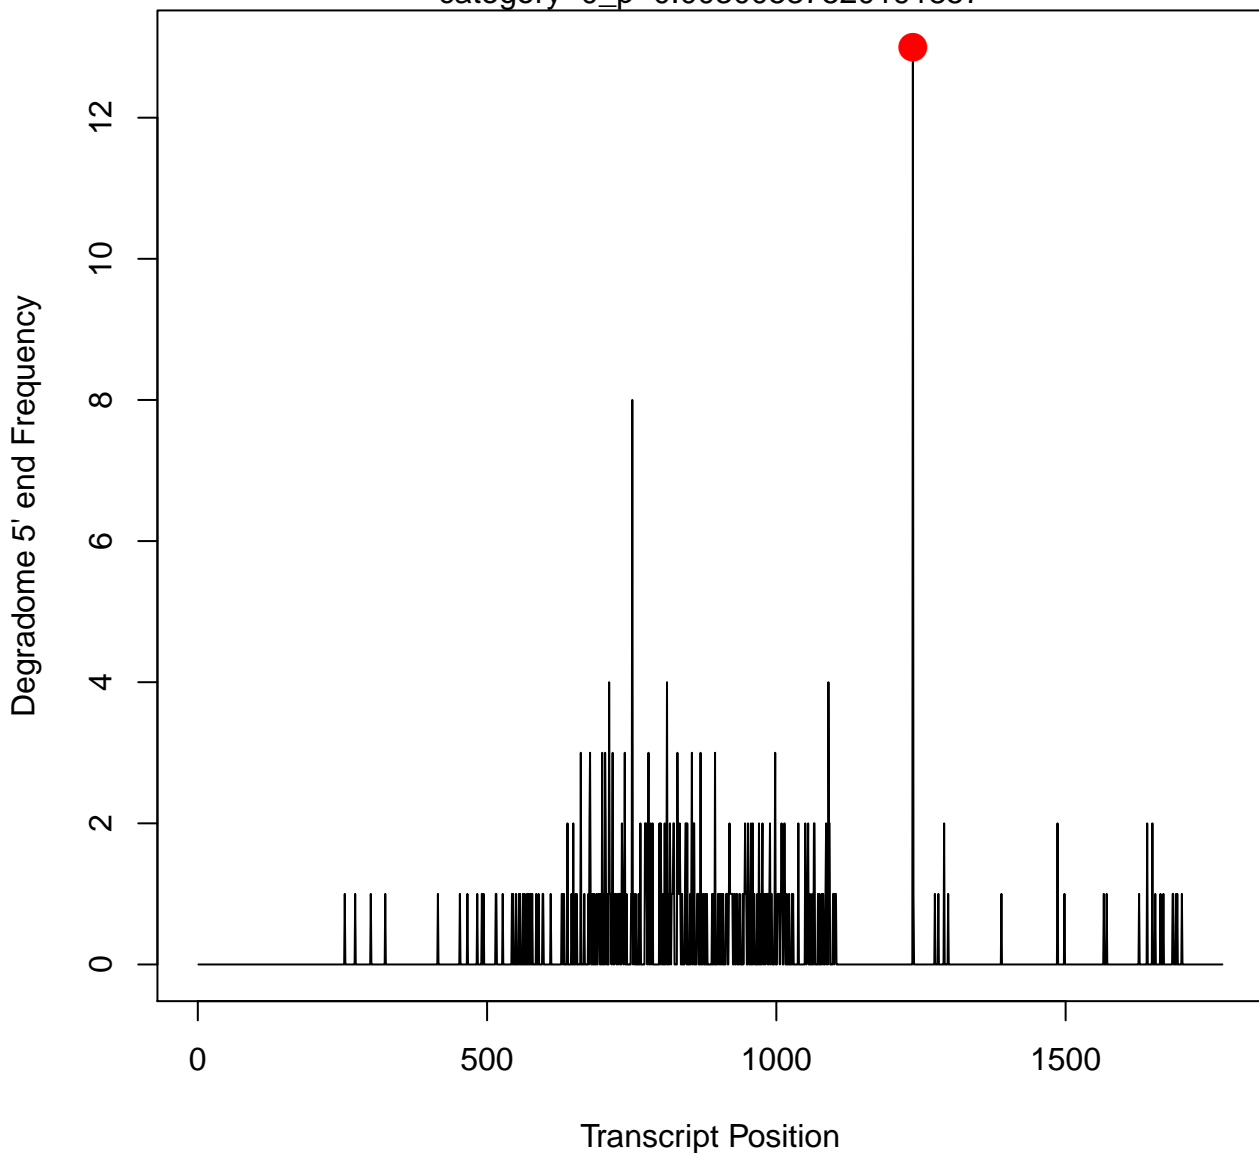

Supplement: s1 [file s1]

**T=Cluster-18410.6240\_Q=pma-miR947\_S=367**

category=2\_p=0.0887427285779705

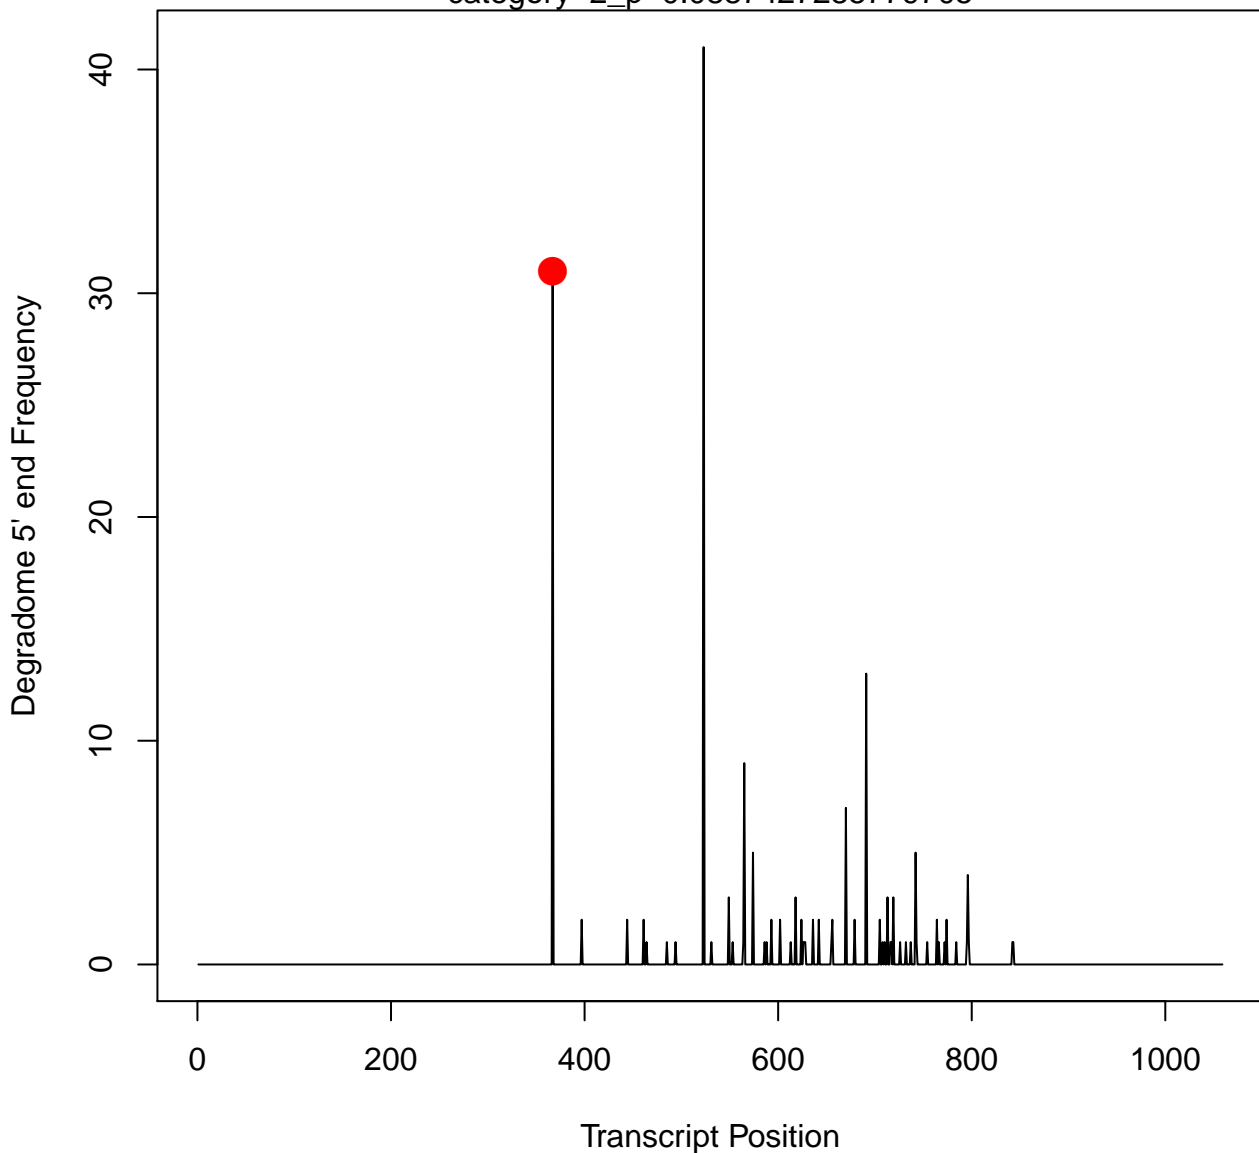

Supplement: s1 [file s1]

**T=Cluster-18410.37319\_Q=novel\_193\_S=78**

category=0\_p=0.0178973086954992

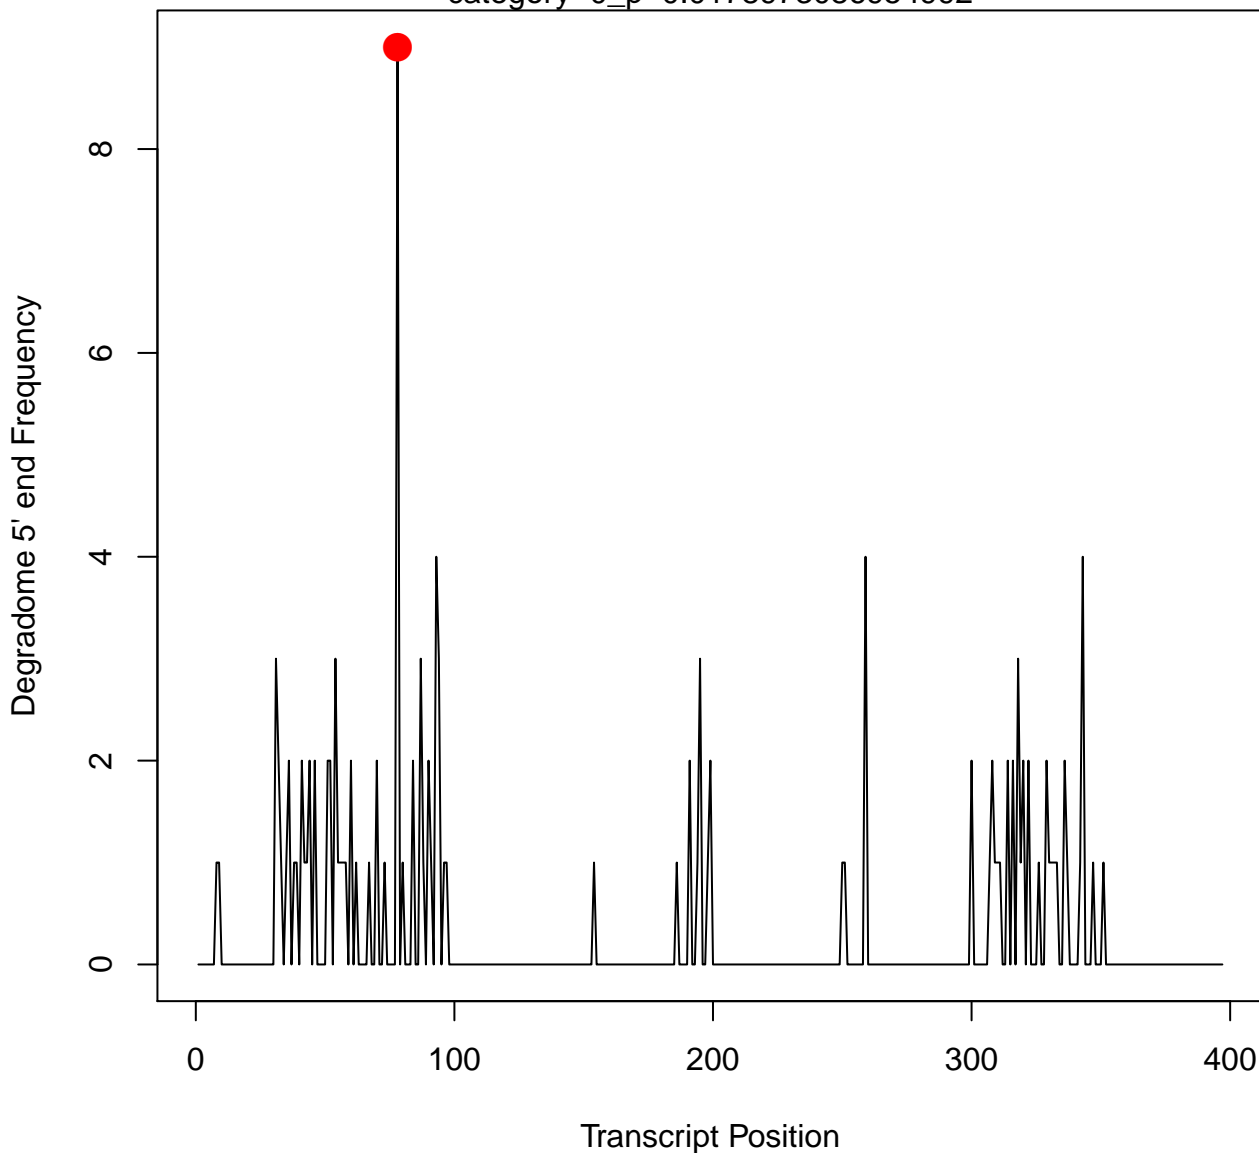

Supplement: s1 [file s1]

**T=Cluster-18410.56128\_Q=novel\_62\_S=48**

category=3\_p=0.093081058041071

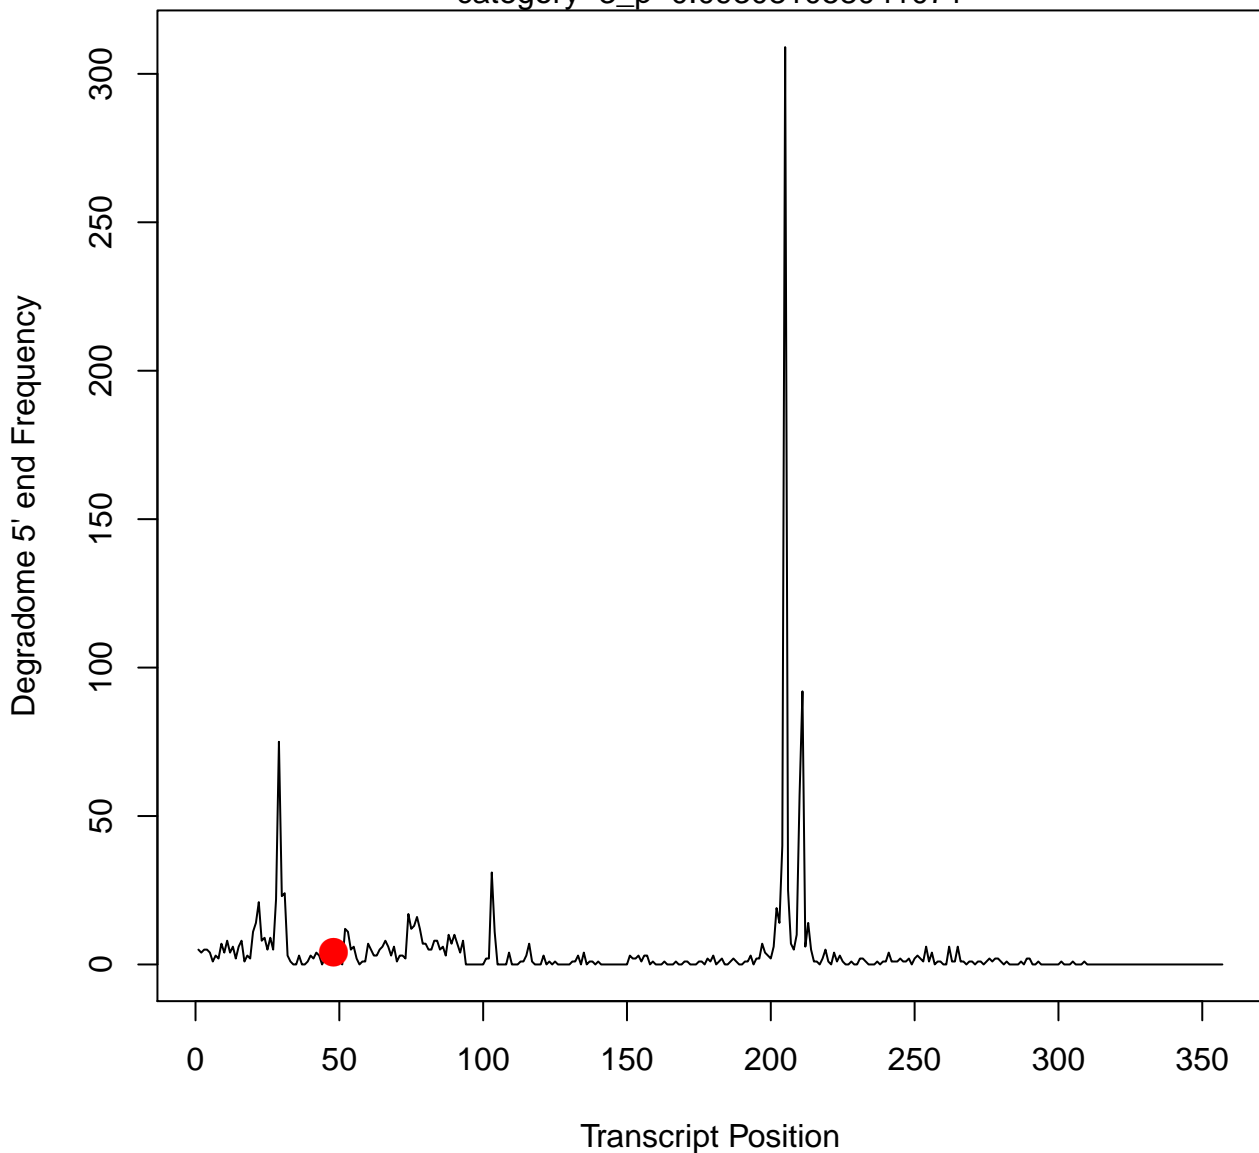

Supplement: s1 [file s1]

**T=Cluster-18410.32133\_Q=pma-miR1315\_S=238**

category=1\_p=0.0203786250241876

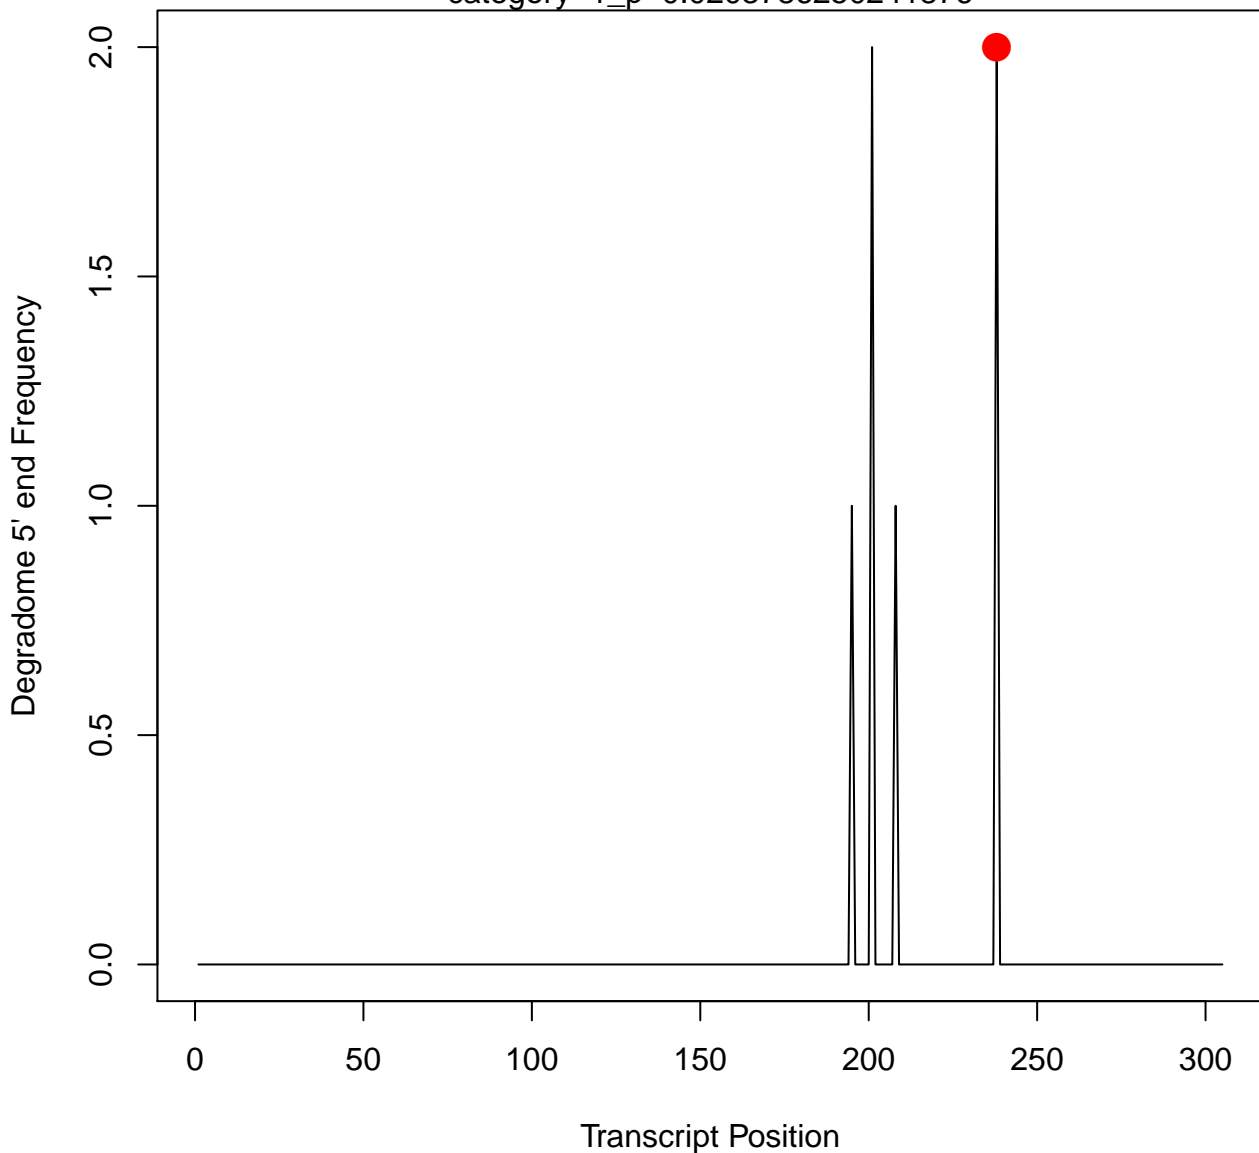

Supplement: s1 [file s1]

**T=Cluster-18410.46638\_Q=novel\_1\_S=286**

category=0\_p=0.0707078569033008

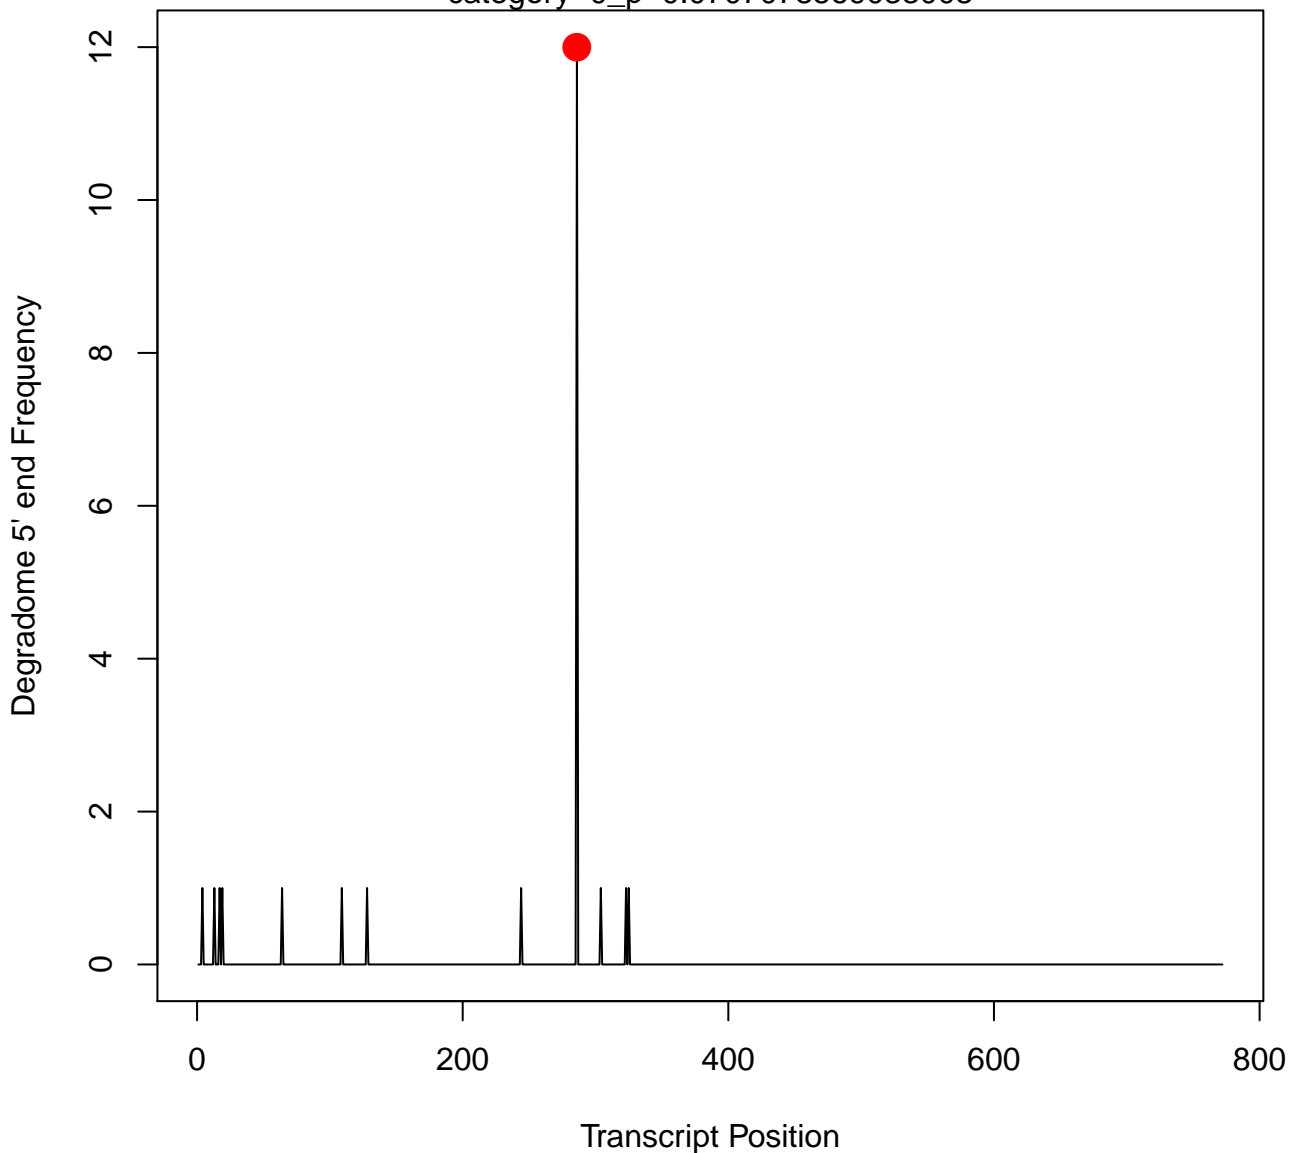

Supplement: s1 [file s1]

**T=Cluster-18410.13952\_Q=novel\_21\_S=714**

category=0\_p=0.00218662432695249

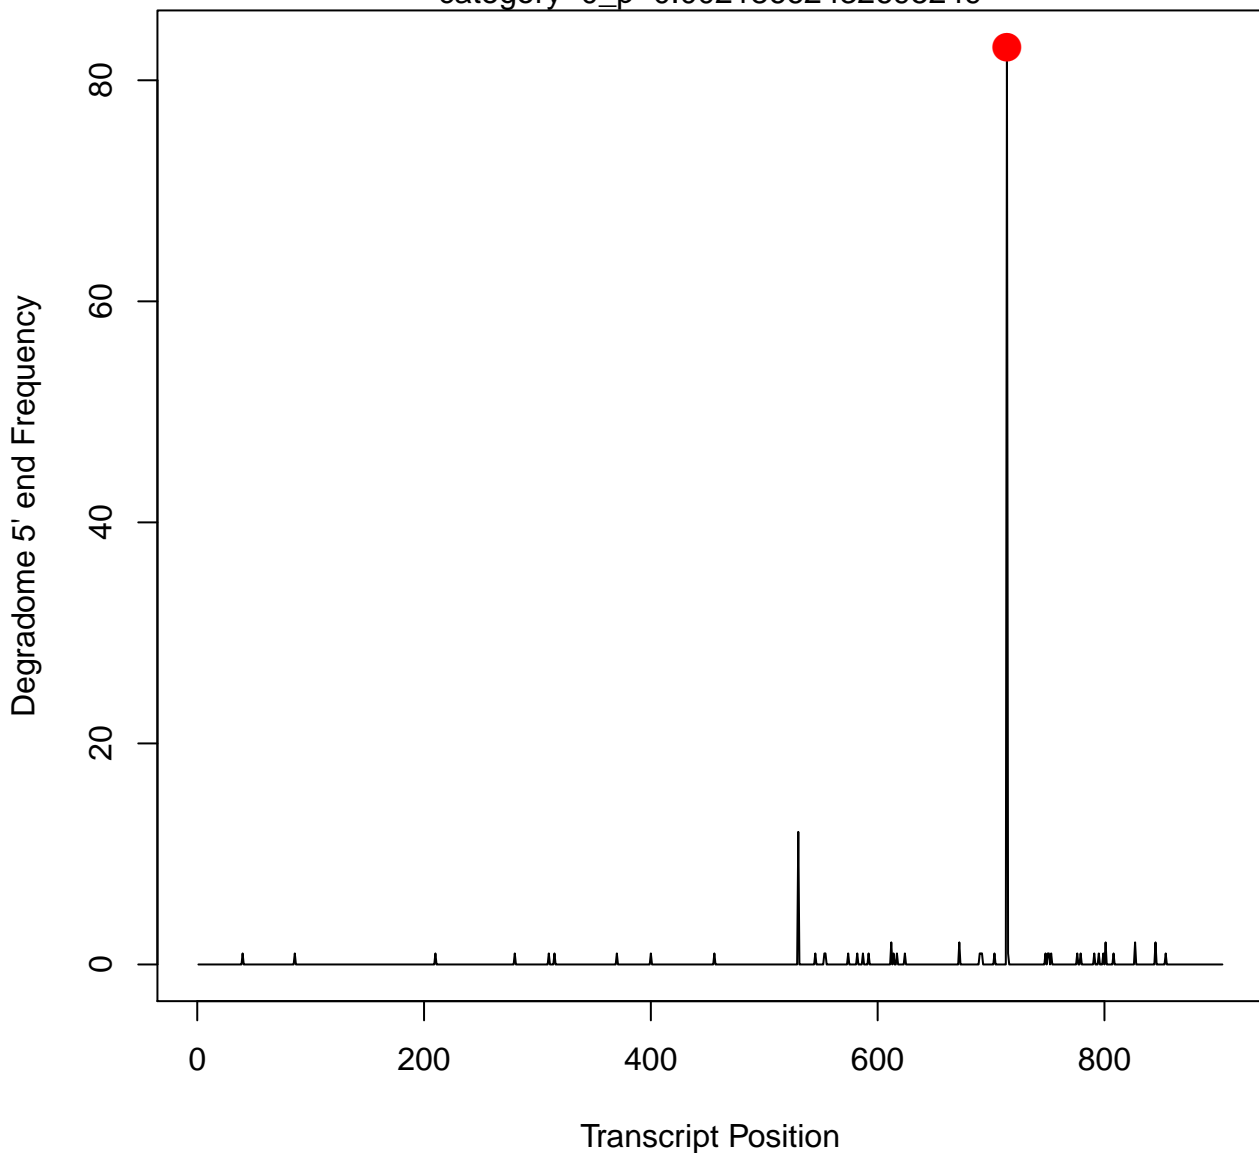

Supplement: s1 [file s1]

**T=Cluster-18410.86407\_Q=novel\_197\_S=126**

category=0\_p=0.00464086203705827

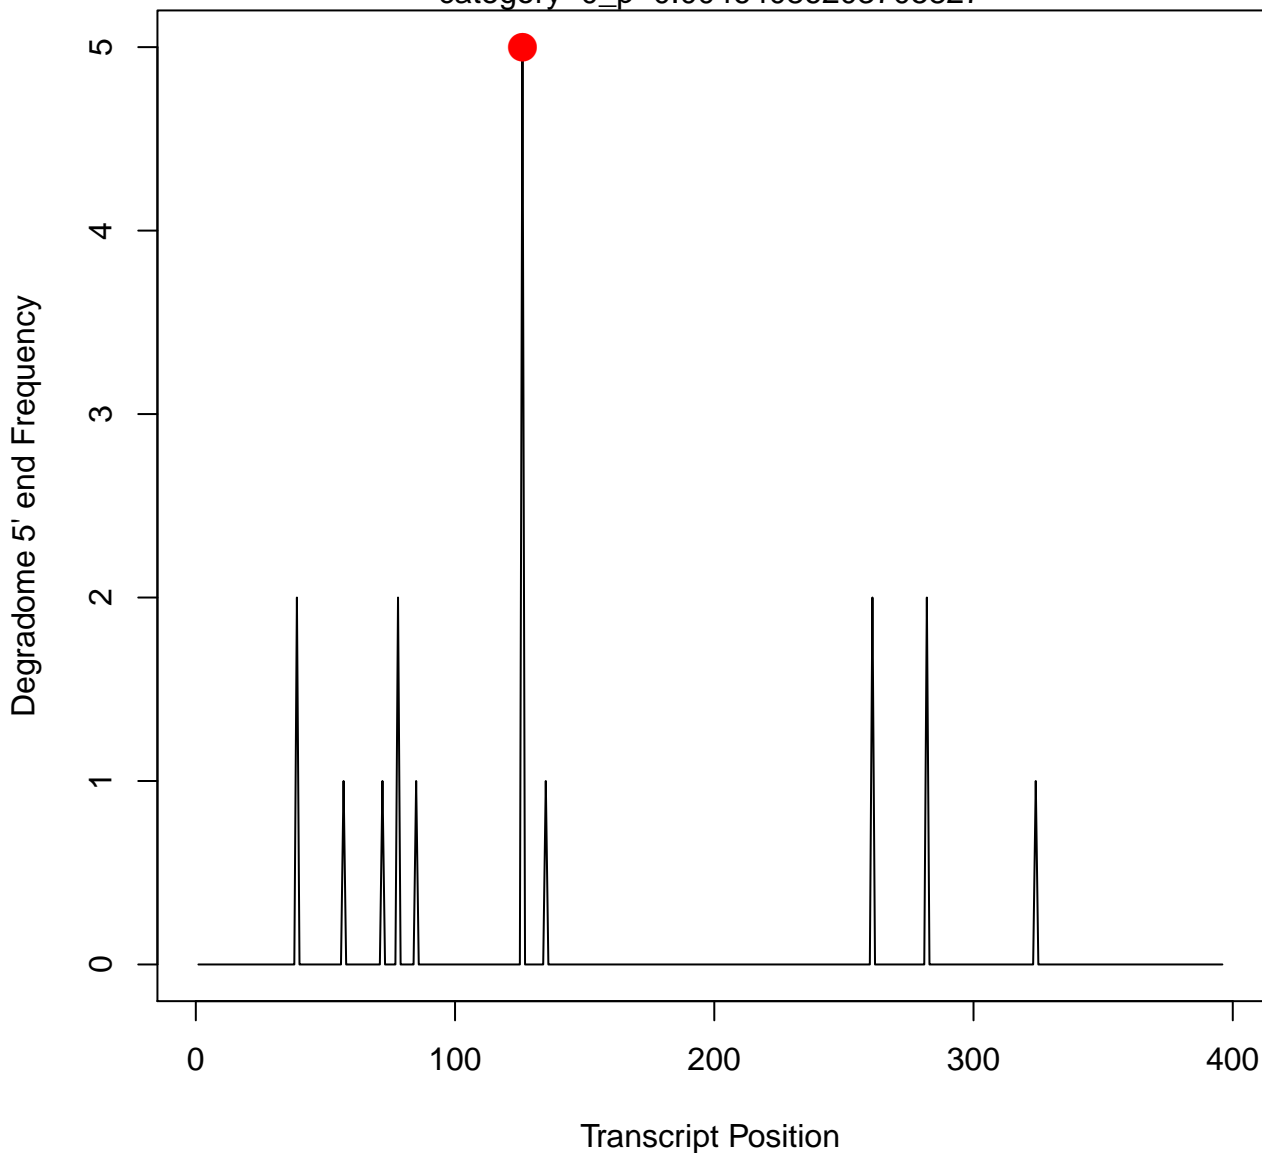

Supplement: s1 [file s1]

**T=Cluster-5392.0\_Q=pma-miR949\_S=74**

category=0\_p=0.00245961596621247

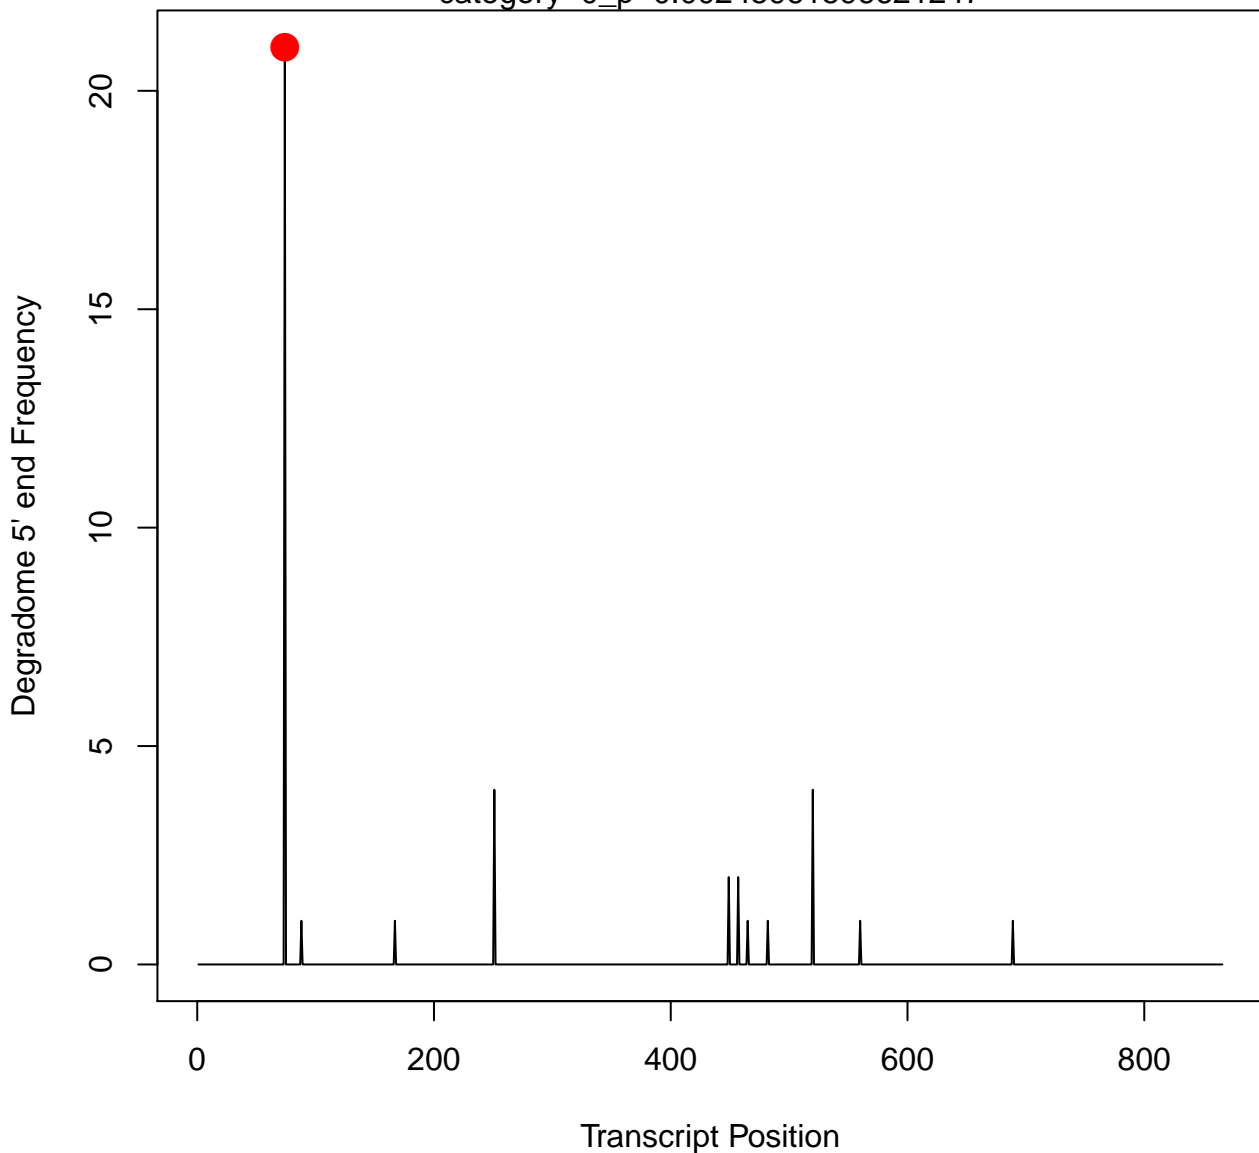

Supplement: s1 [file s1]

**T=Cluster-18410.23996\_Q=novel\_148\_S=305**

category=0\_p=0.00953124285792795

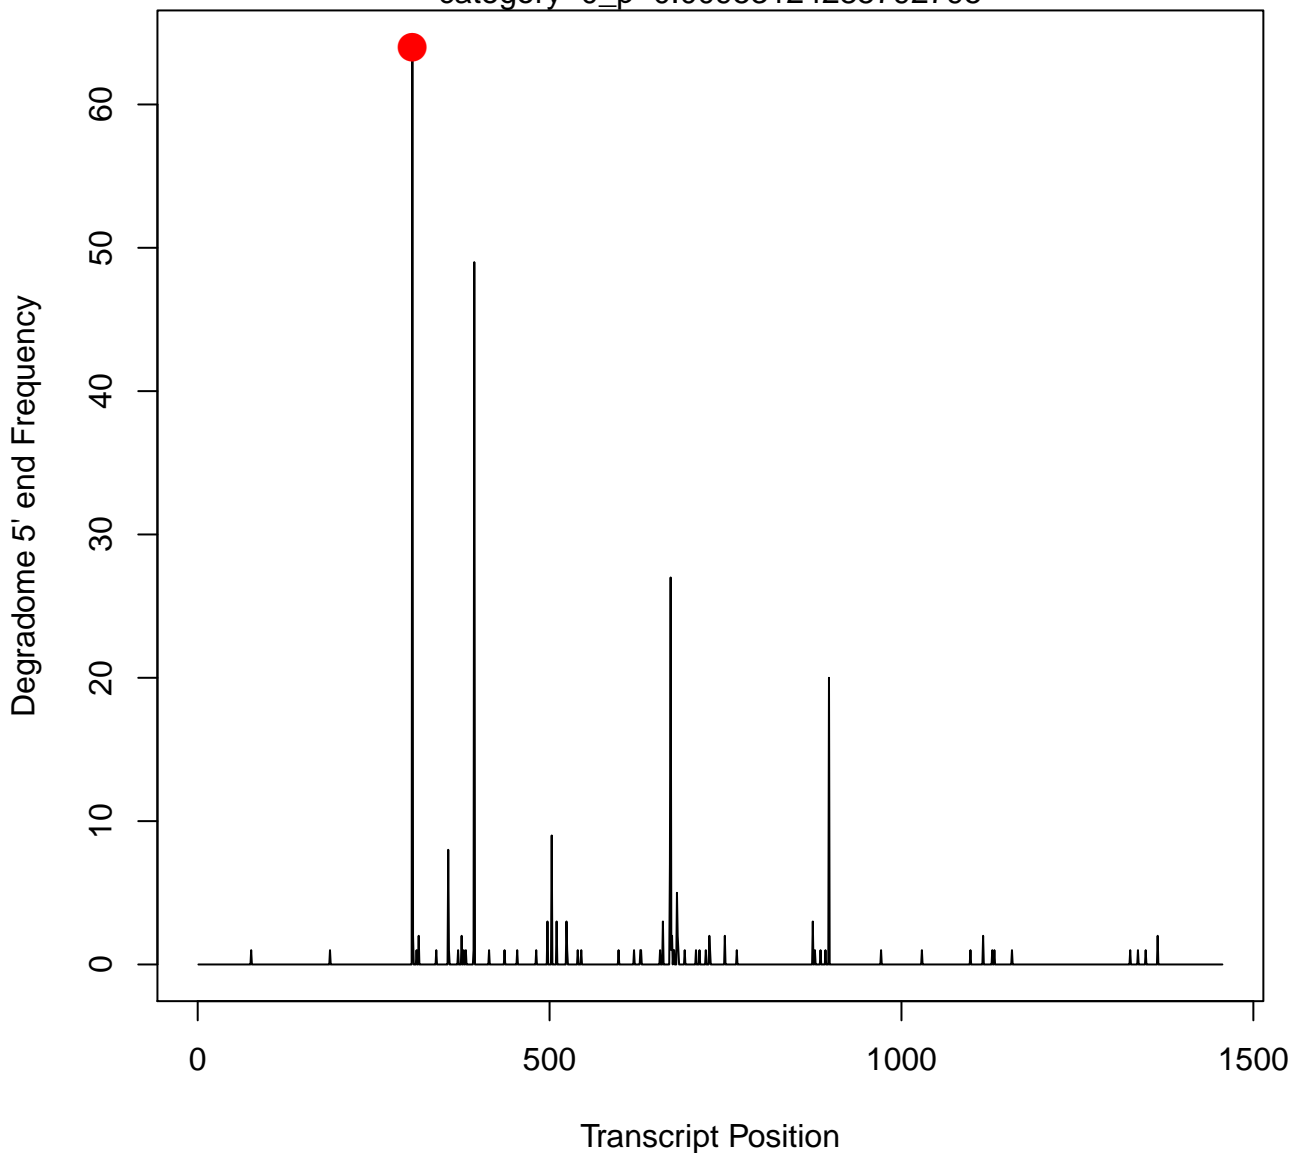

Supplement: s1 [file s1]

**T=Cluster-18410.32754\_Q=novel\_14\_S=965**

category=2\_p=0.0992668787568005

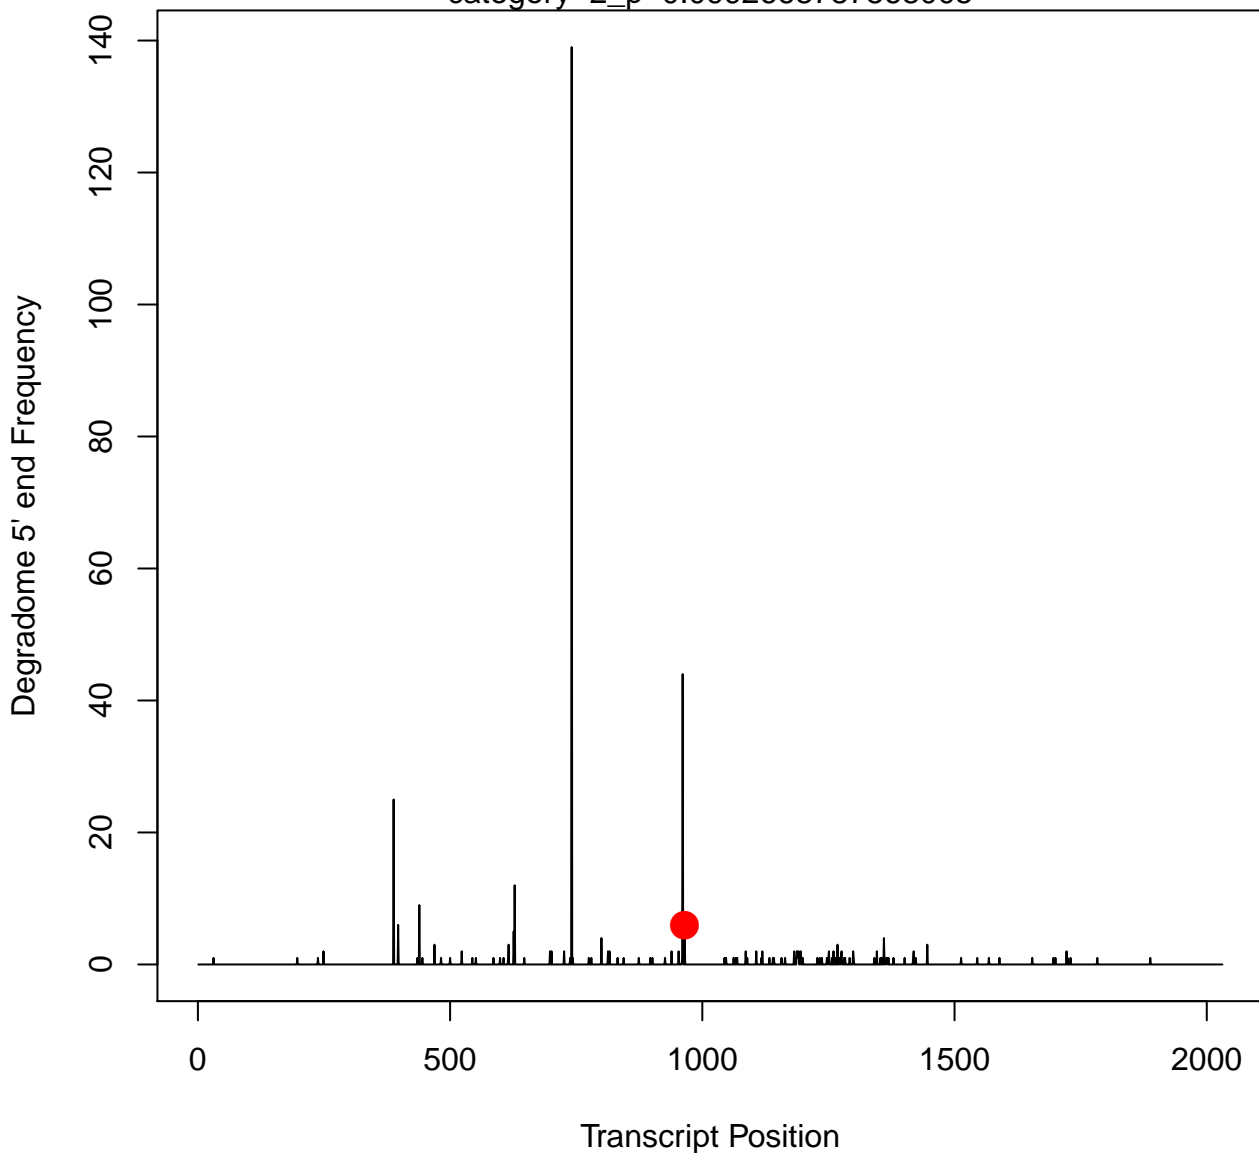

Supplement: s1 [file s1]

**T=Cluster-18410.29478\_Q=novel\_46\_S=1059**

category=0\_p=0.00355083585007077

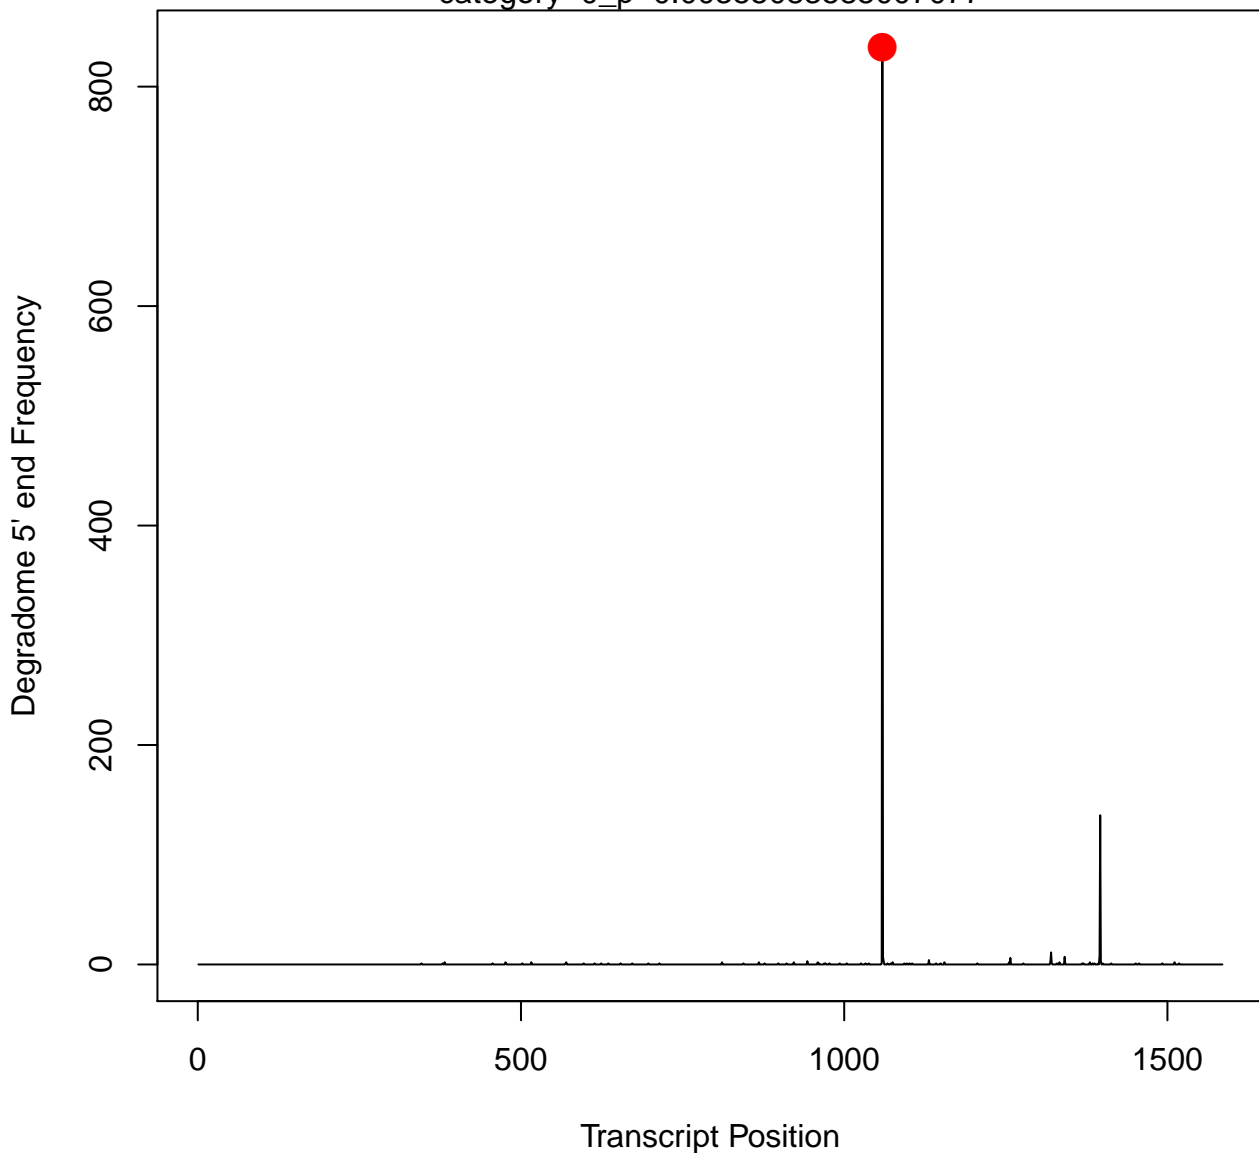

Supplement: s1 [file s1]

**T=Cluster-18410.28834\_Q=novel\_14\_S=899**

category=0\_p=0.00191355797950399

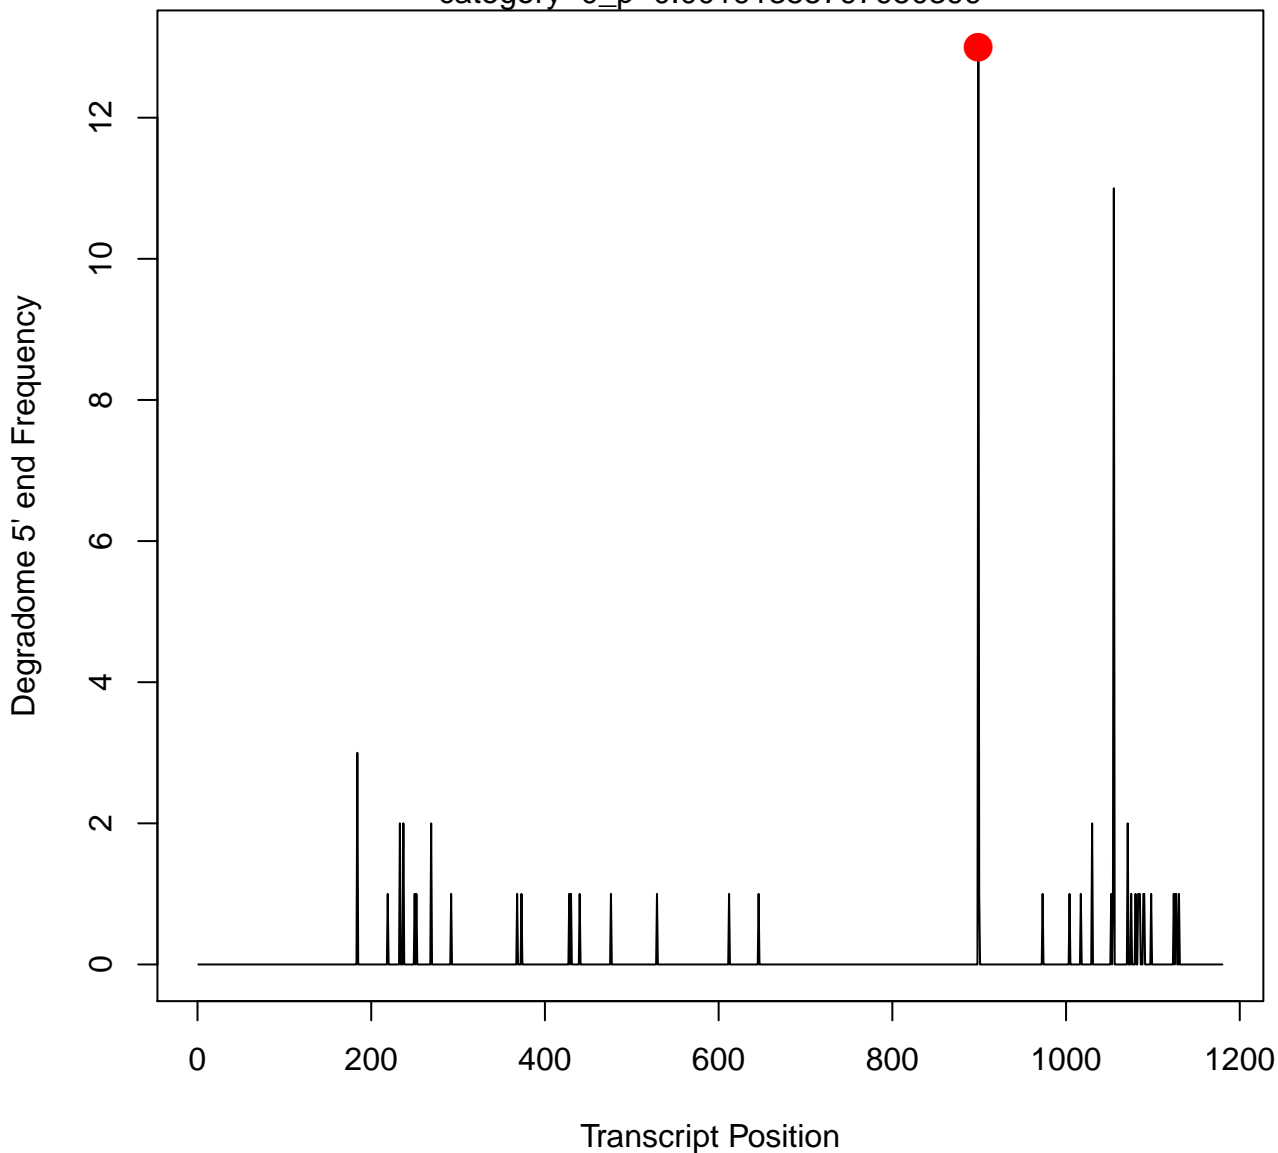

Supplement: s1 [file s1]

**T=Cluster-18410.26675\_Q=novel\_159\_S=796**

category=2\_p=0.0454020367599618

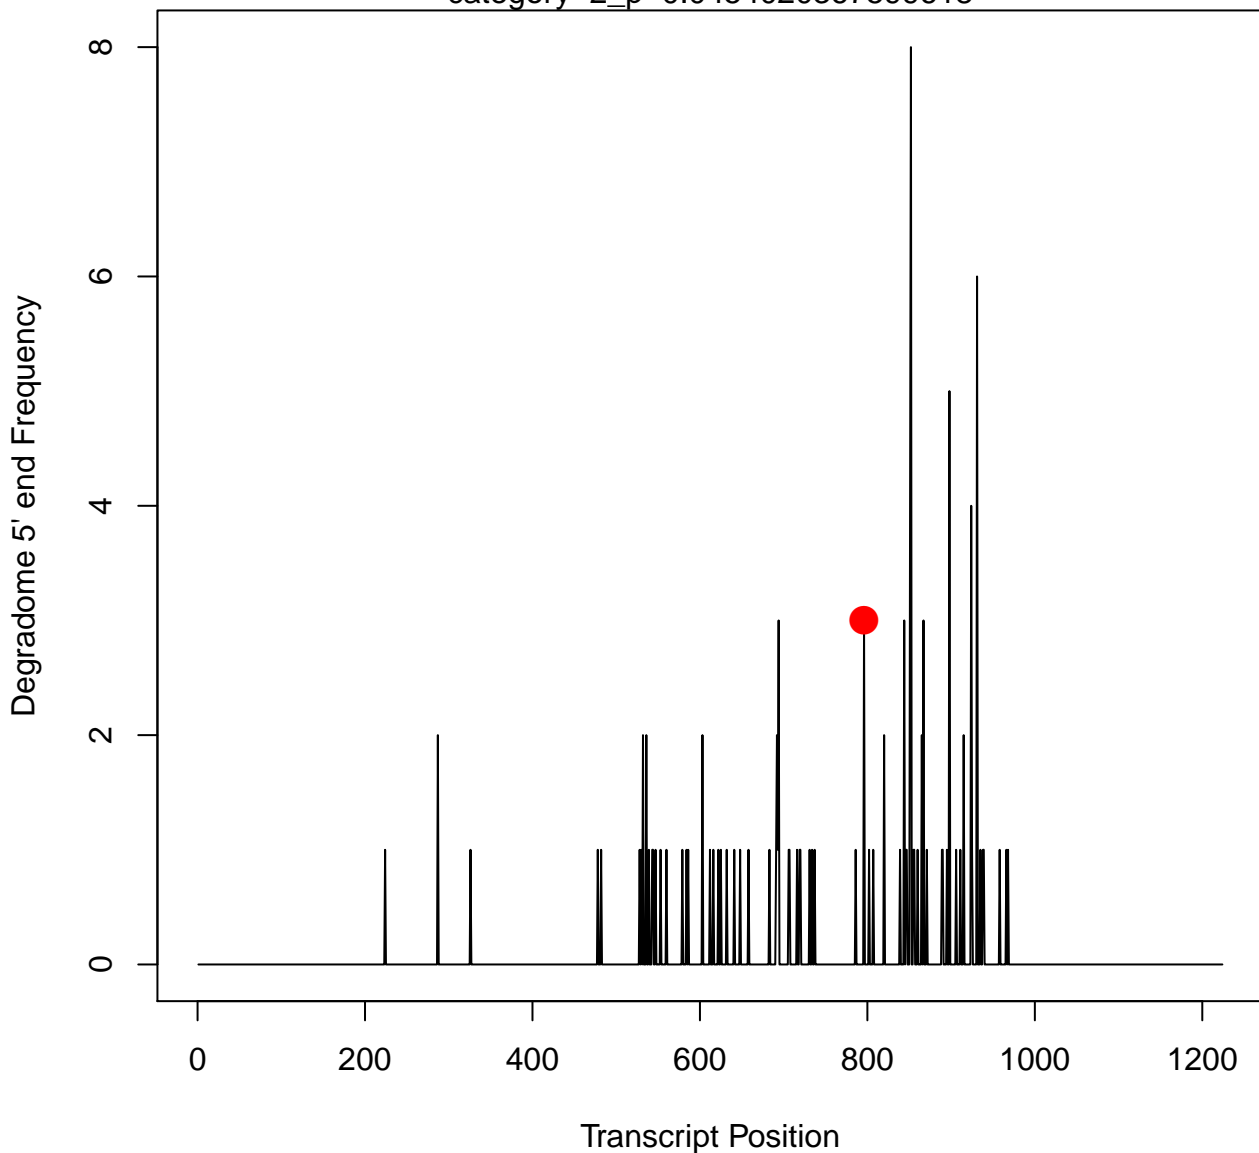

Supplement: s1 [file s1]

**T=Cluster-18410.59101\_Q=novel\_87\_S=829**

category=3\_p=0.0579593960730893

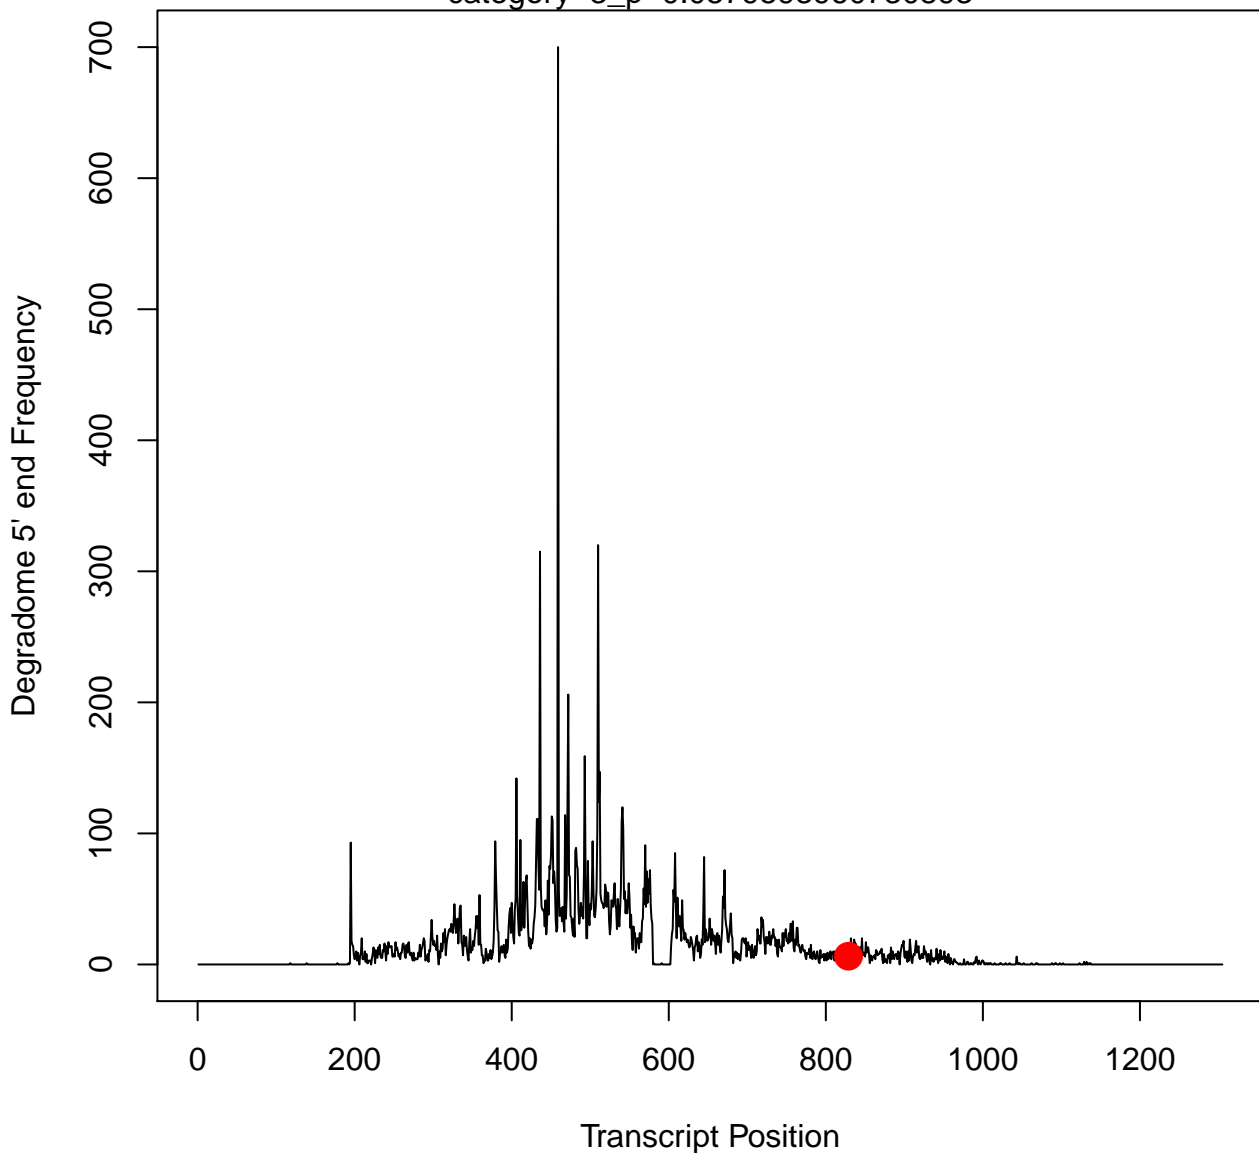

Supplement: s1 [file s1]

**T=Cluster-18410.73152\_Q=novel\_94\_S=395**

category=0\_p=0.0960384723632167

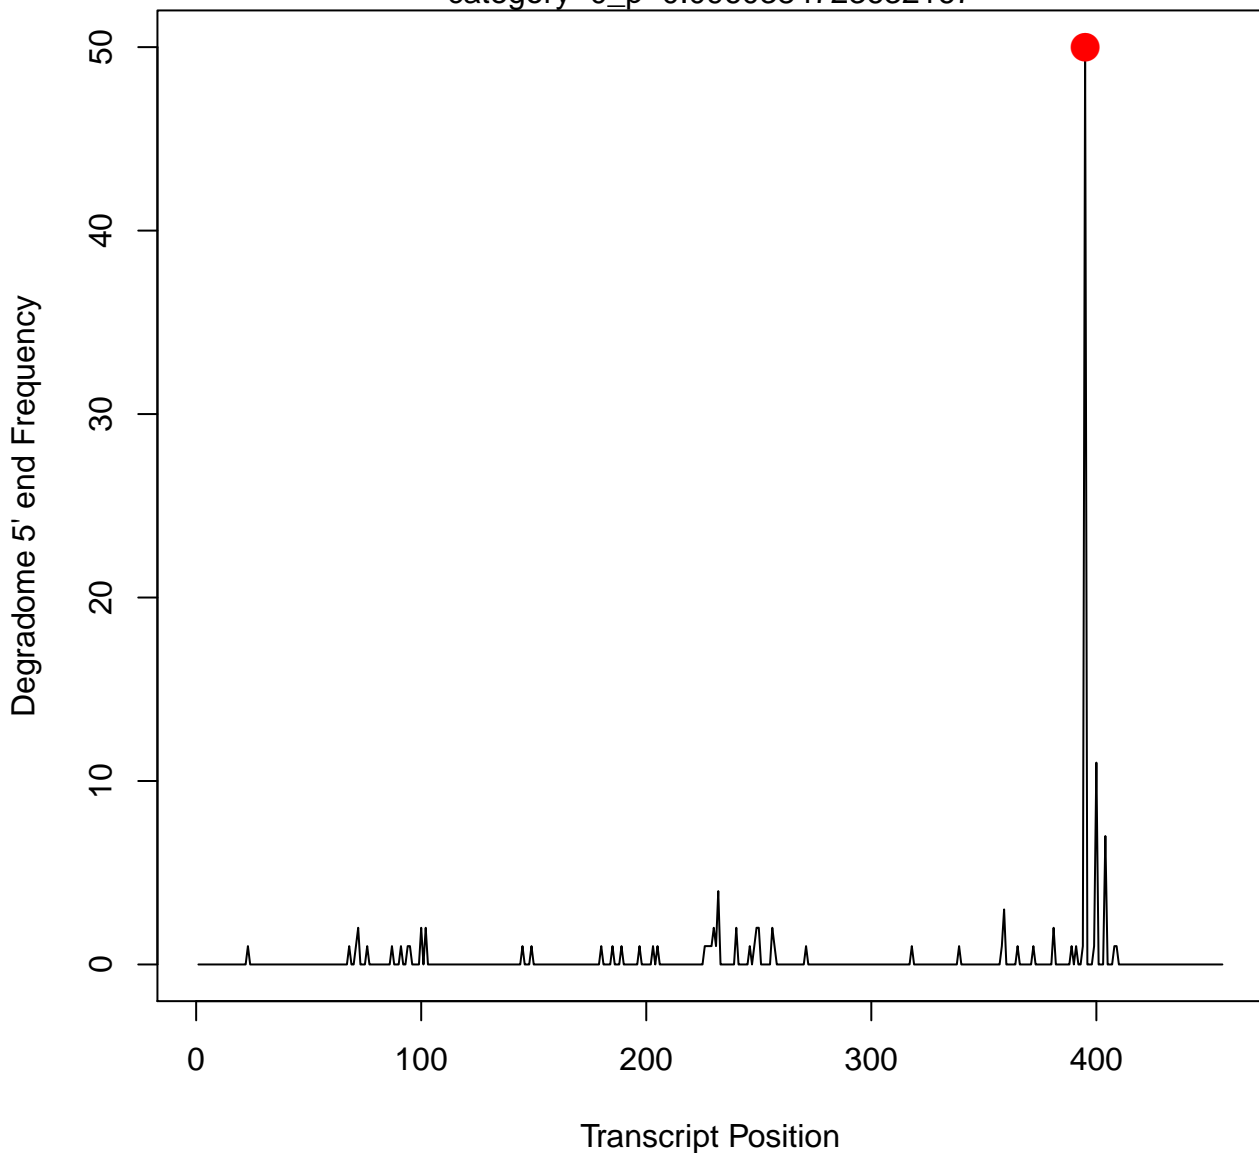

Supplement: s1 [file s1]

**T=Cluster-18410.6400\_Q=novel\_2\_S=1755**

category=0\_p=0.00763228970729513

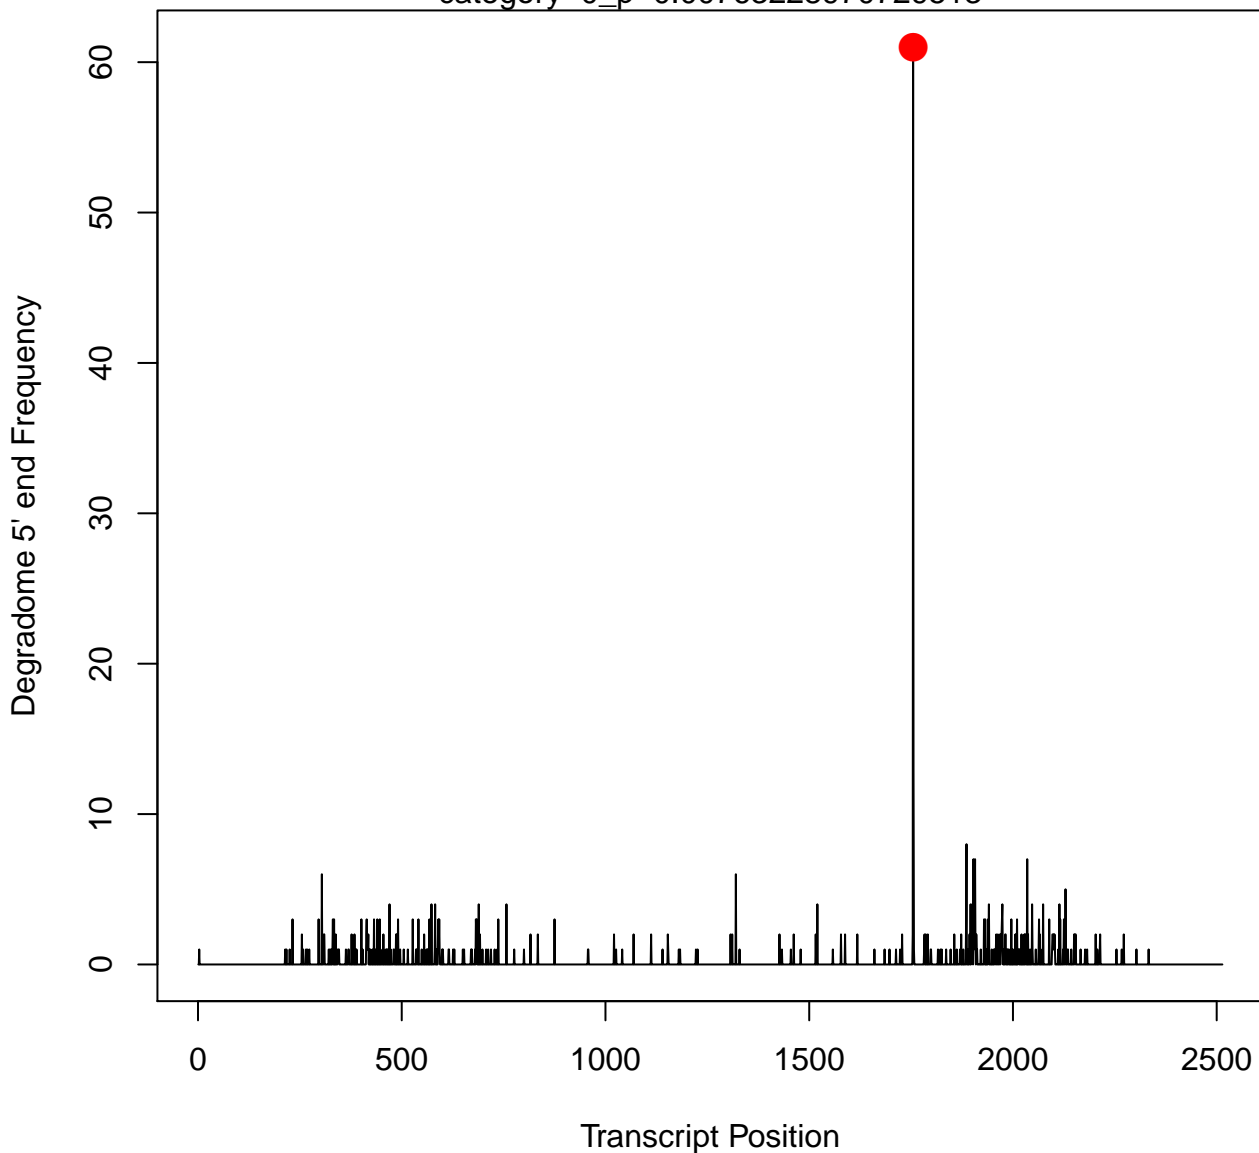

Supplement: s1 [file s1]

**T=Cluster-18410.33710\_Q=novel\_11\_S=1379**

category=2\_p=0.0887427285779705

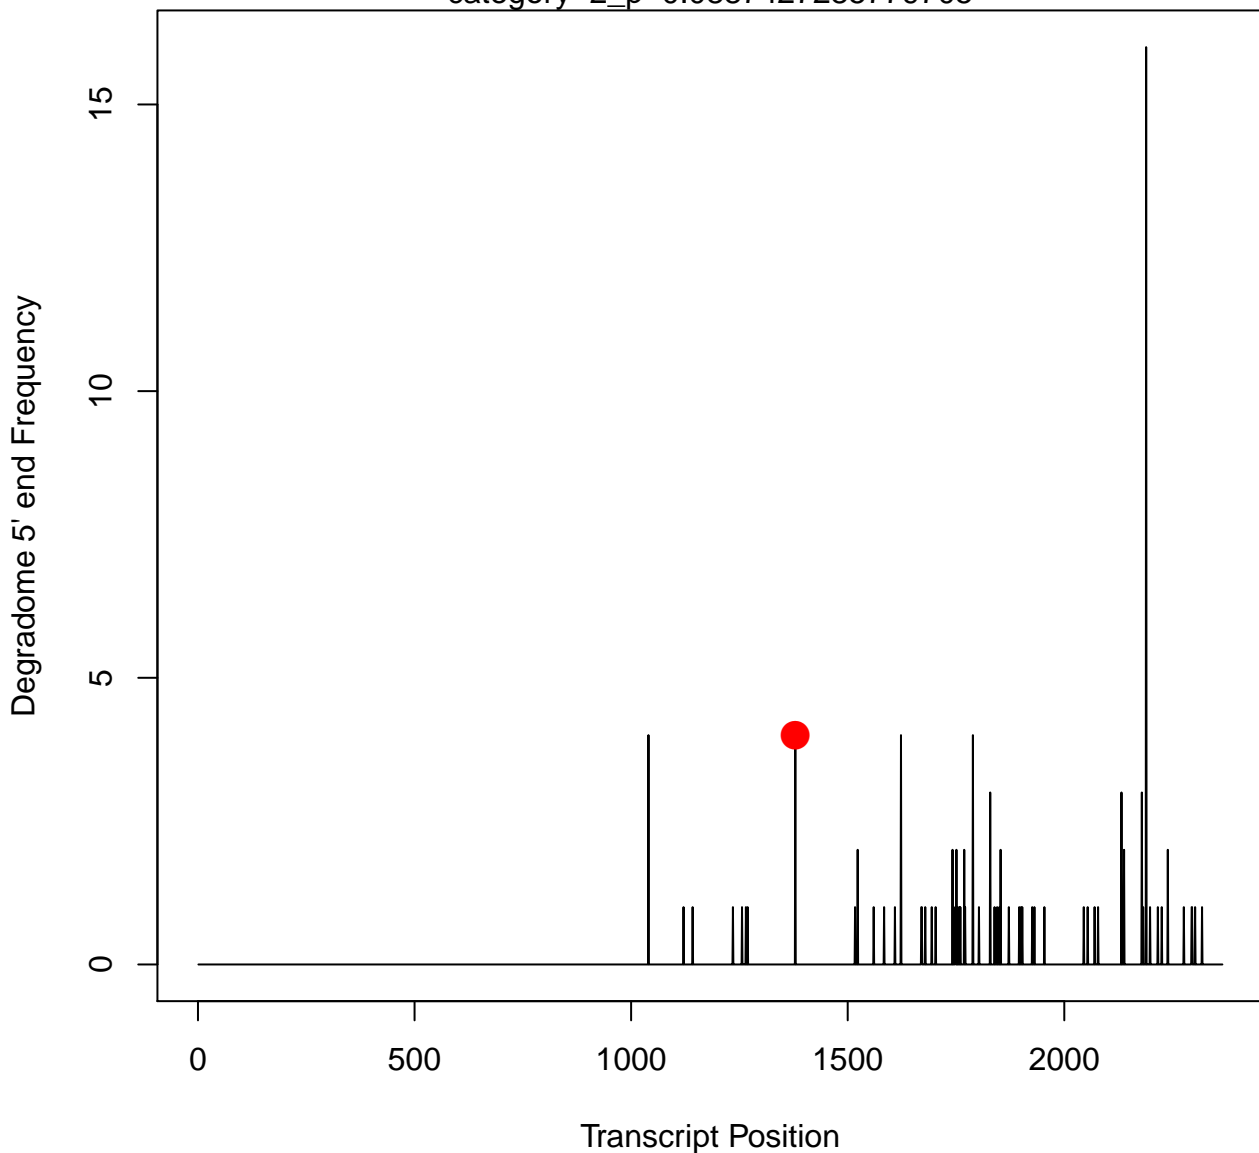

Supplement: s1 [file s1]

**T=Cluster-18410.67703\_Q=novel\_82\_S=551**

category=0\_p=0.0607378455381737

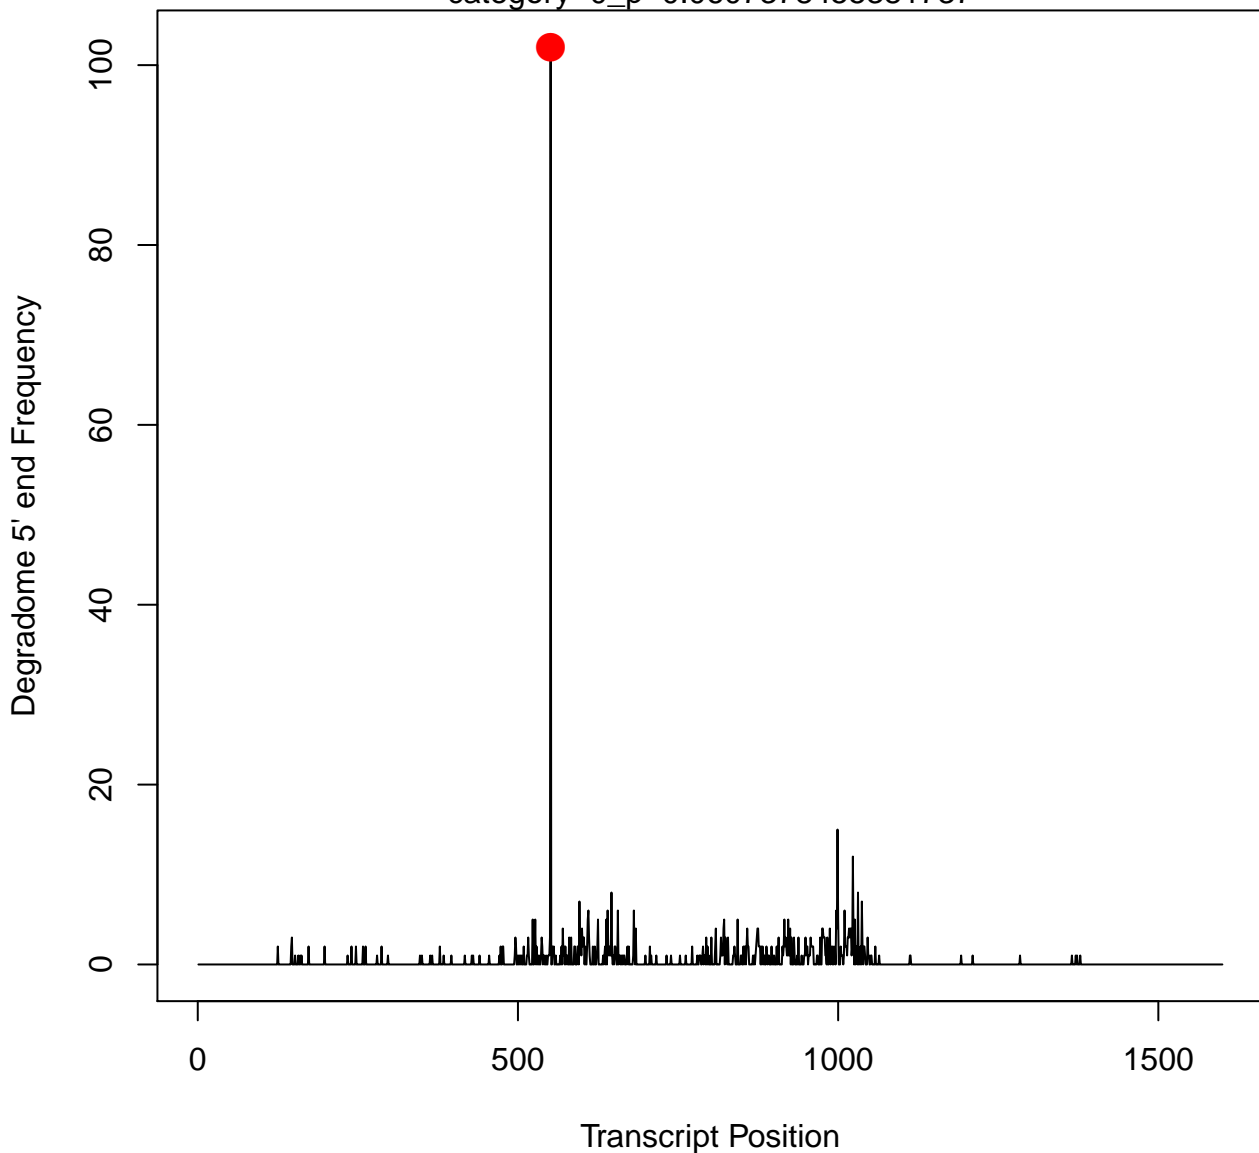

Supplement: s1 [file s1]

**T=Cluster-18410.101489\_Q=novel\_63\_S=170**

category=2\_p=0.0673240995462872

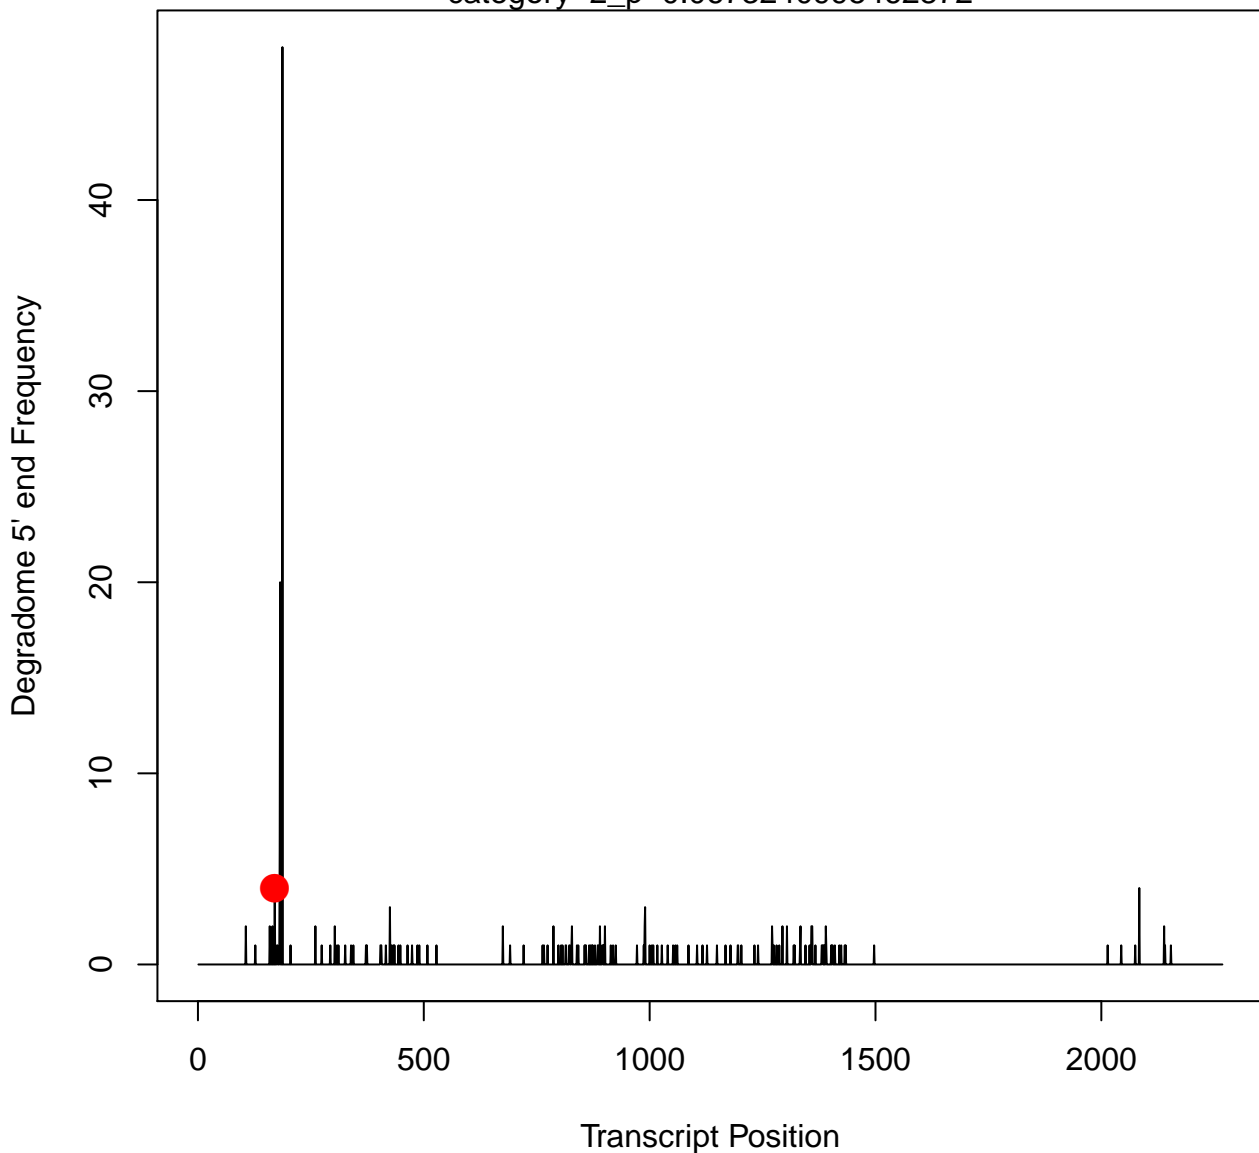

Supplement: s1 [file s1]

**T=Cluster-18410.35931\_Q=novel\_114\_S=633**

category=0\_p=0.000820545098840553

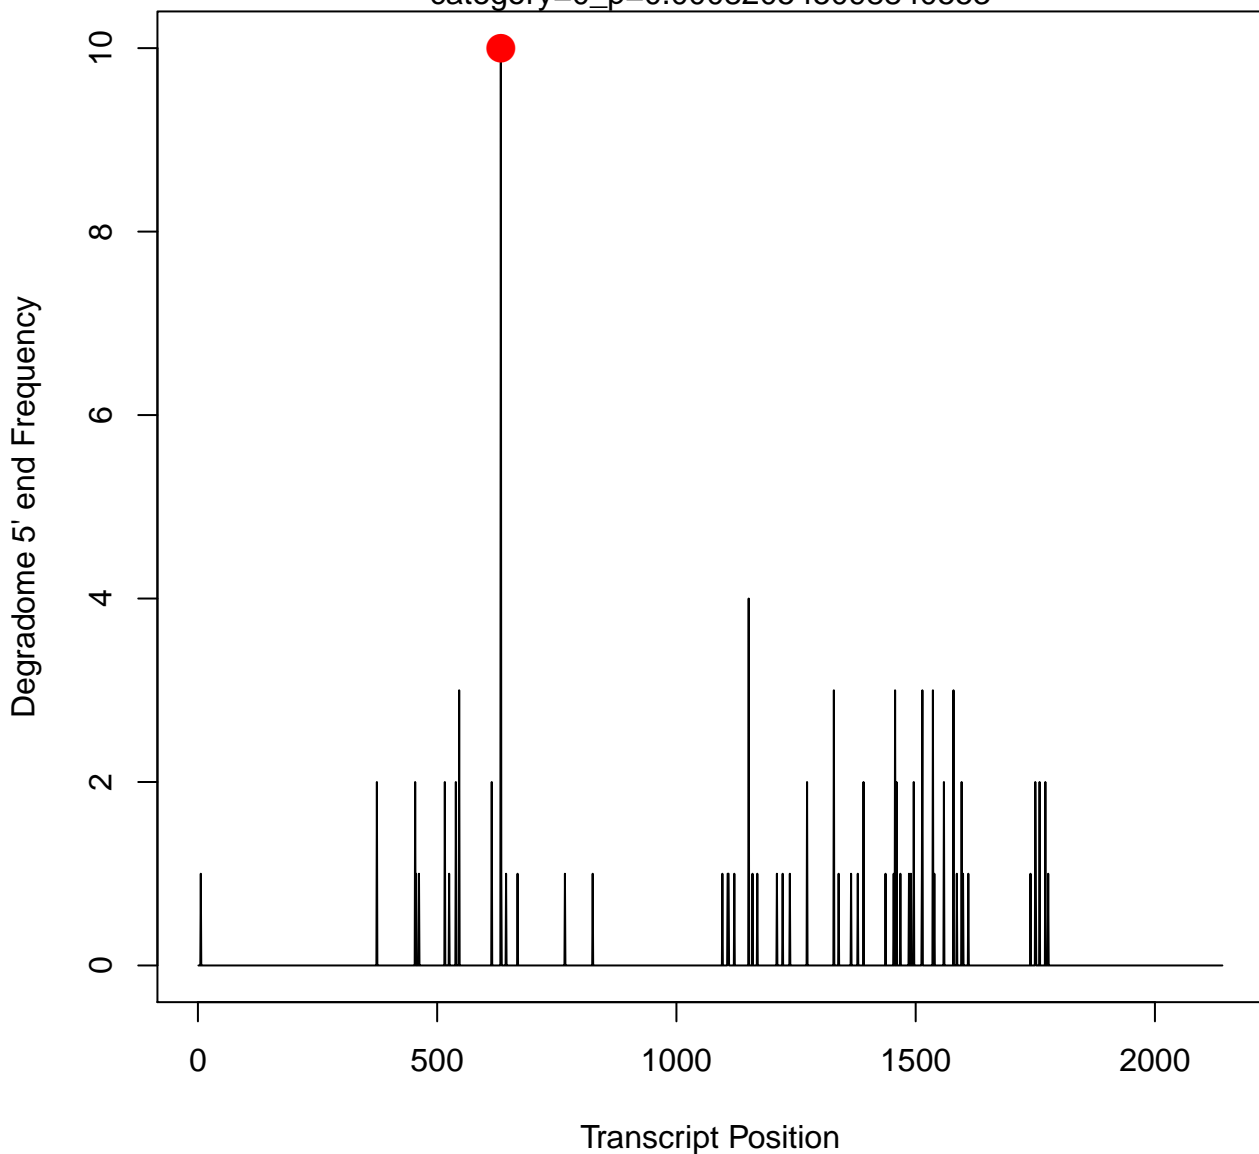

Supplement: s1 [file s1]

**T=Cluster-18410.33711\_Q=novel\_11\_S=1379**

category=2\_p=0.0673240995462872

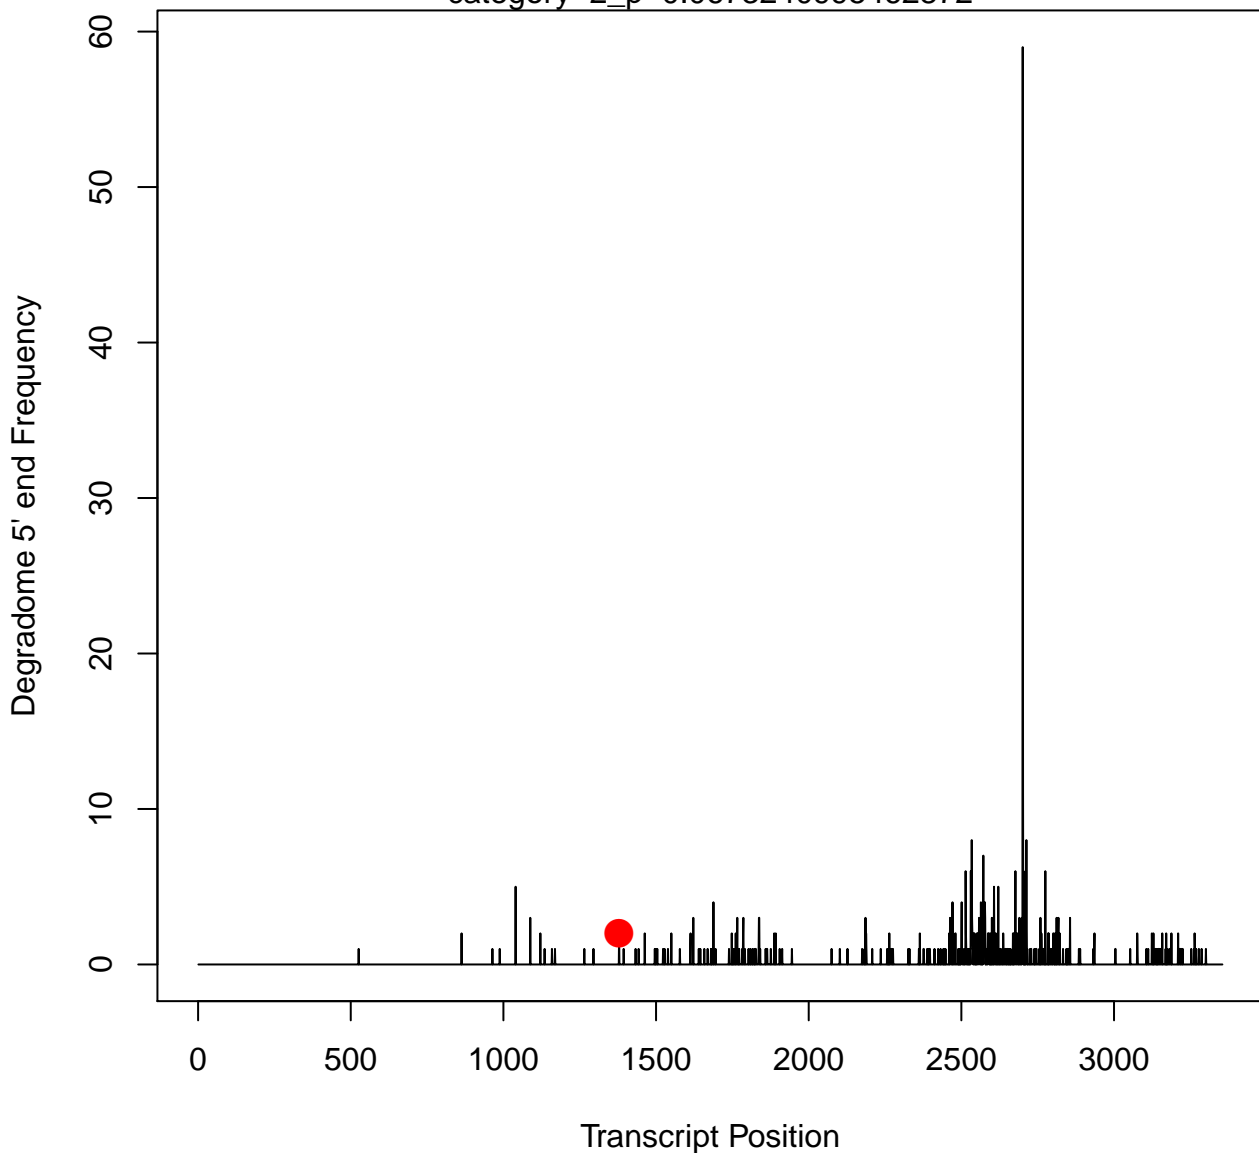

Supplement: s1 [file s1]

**T=Cluster-18410.37526\_Q=novel\_109\_S=207**

category=4\_p=0.0483072886549676

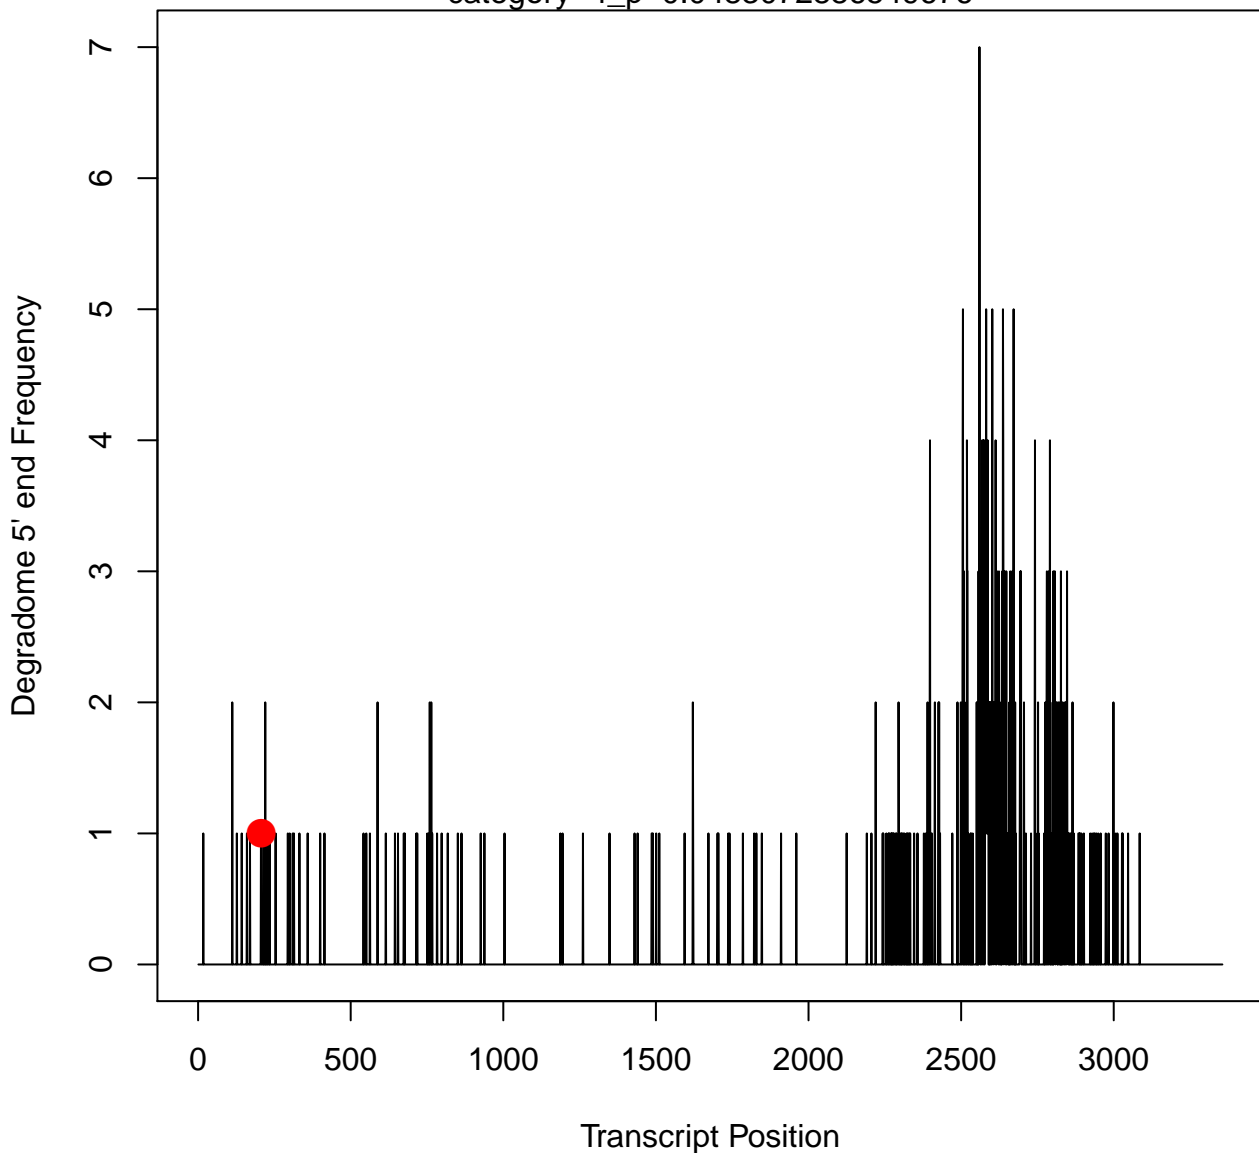

Supplement: s1 [file s1]

**T=Cluster-18410.56575\_Q=novel\_127\_S=319**

category=3\_p=0.0731750829532152

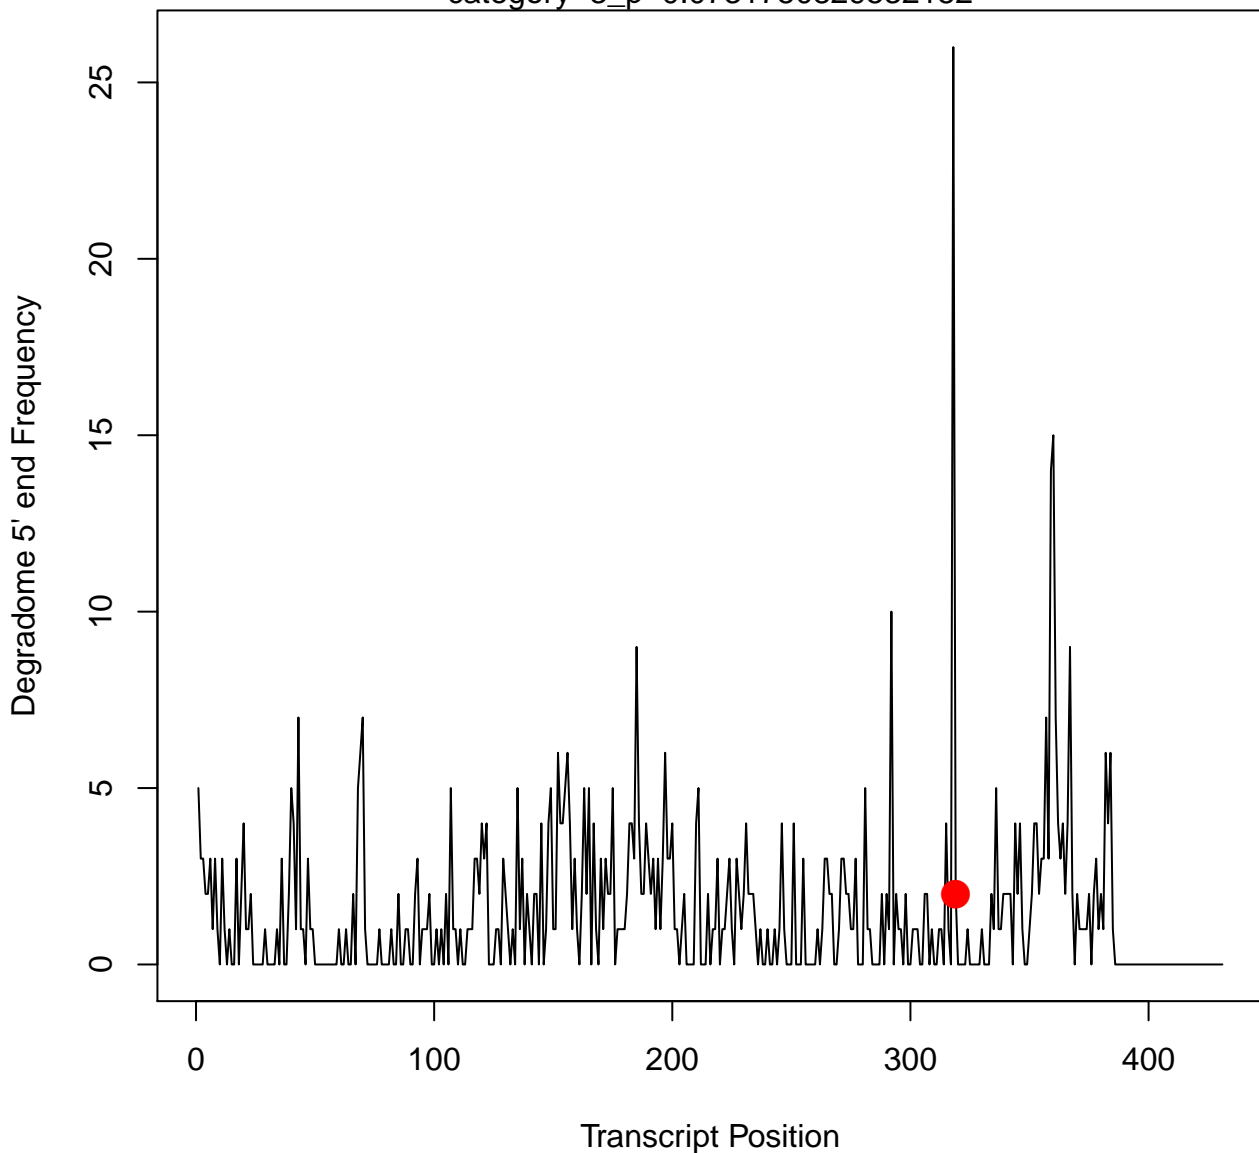

Supplement: s1 [file s1]

**T=Cluster-18624.3\_Q=novel\_80\_S=402**

category=0\_p=0.0253930009578494

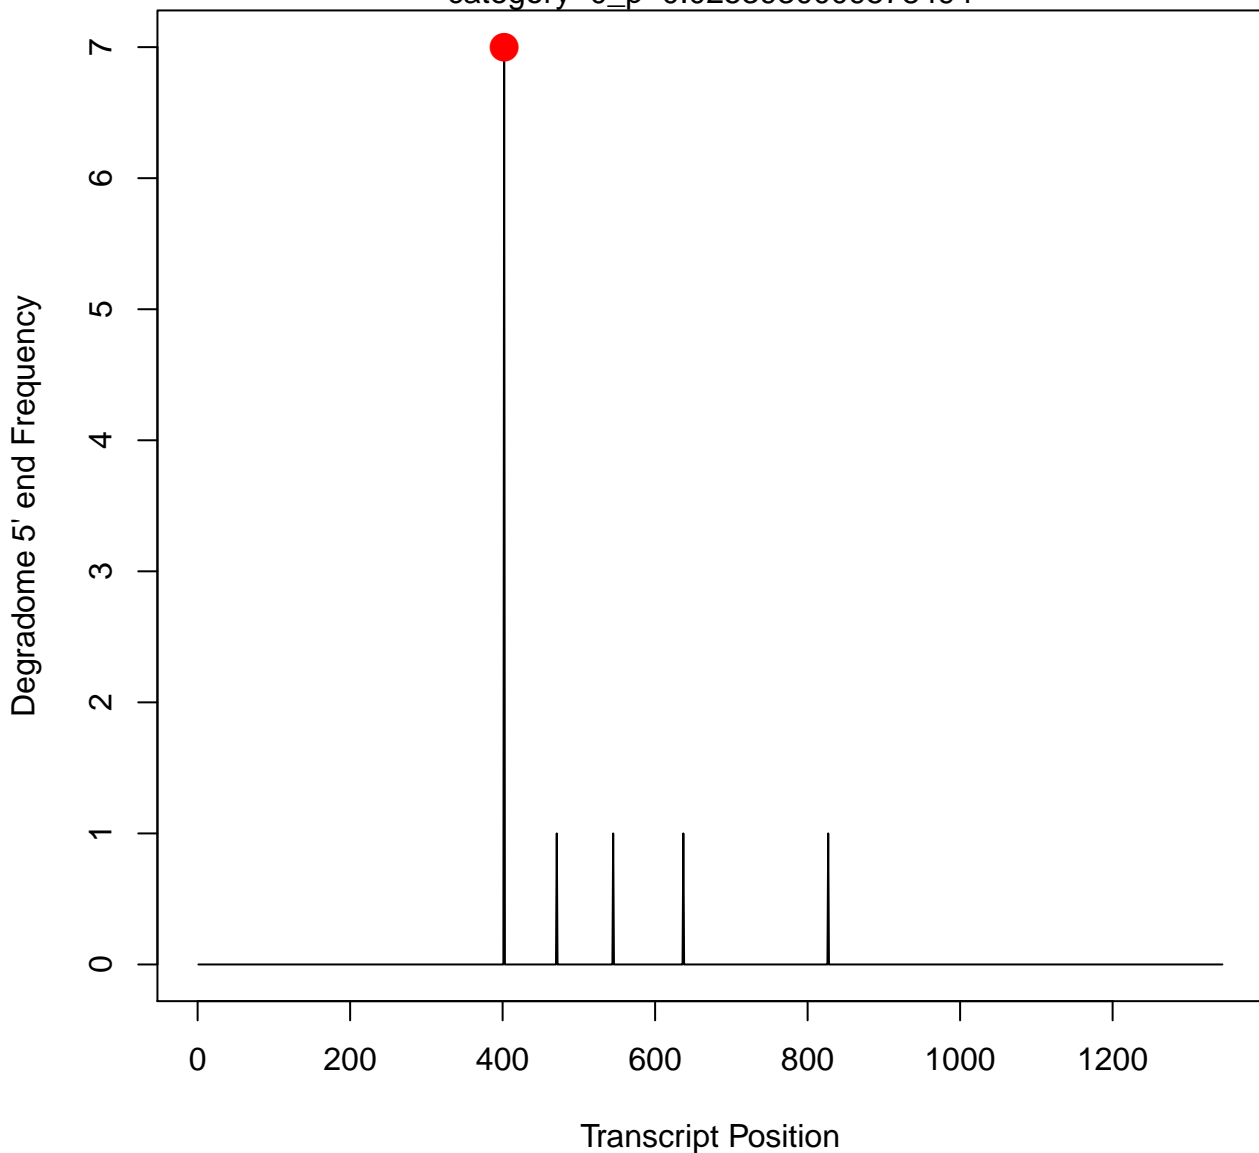

Supplement: s1 [file s1]

**T=Cluster-18410.42831\_Q=pma-miR951\_S=367**

category=0\_p=0.0237916122172683

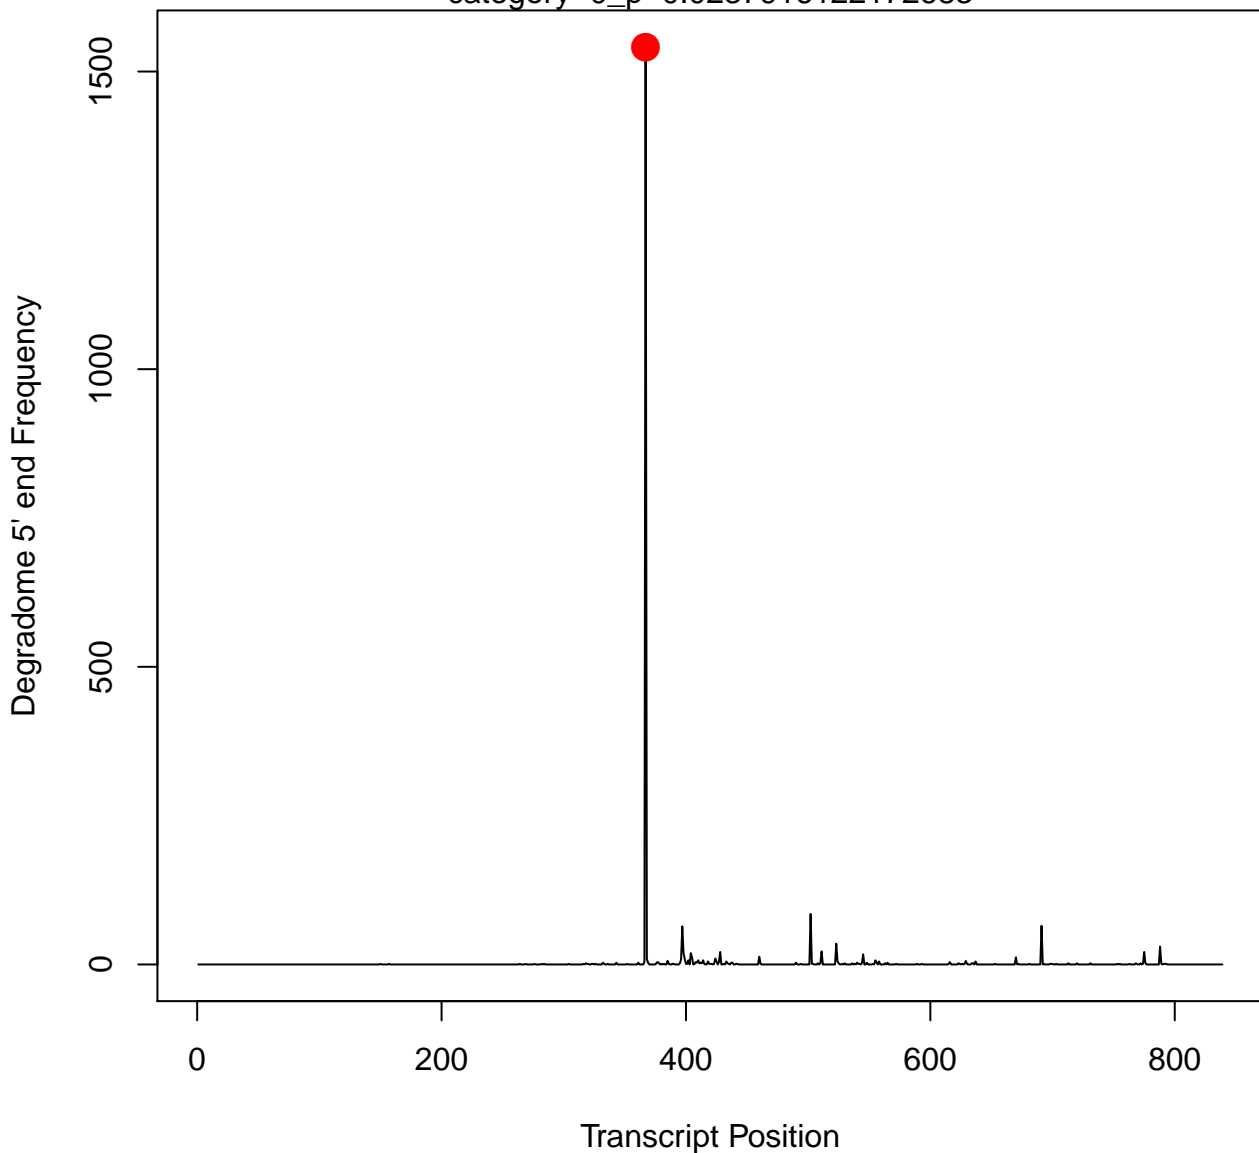

Supplement: s1 [file s1]

**T=Cluster-18410.40856\_Q=novel\_174\_S=463**

category=0\_p=0.0459735641028287

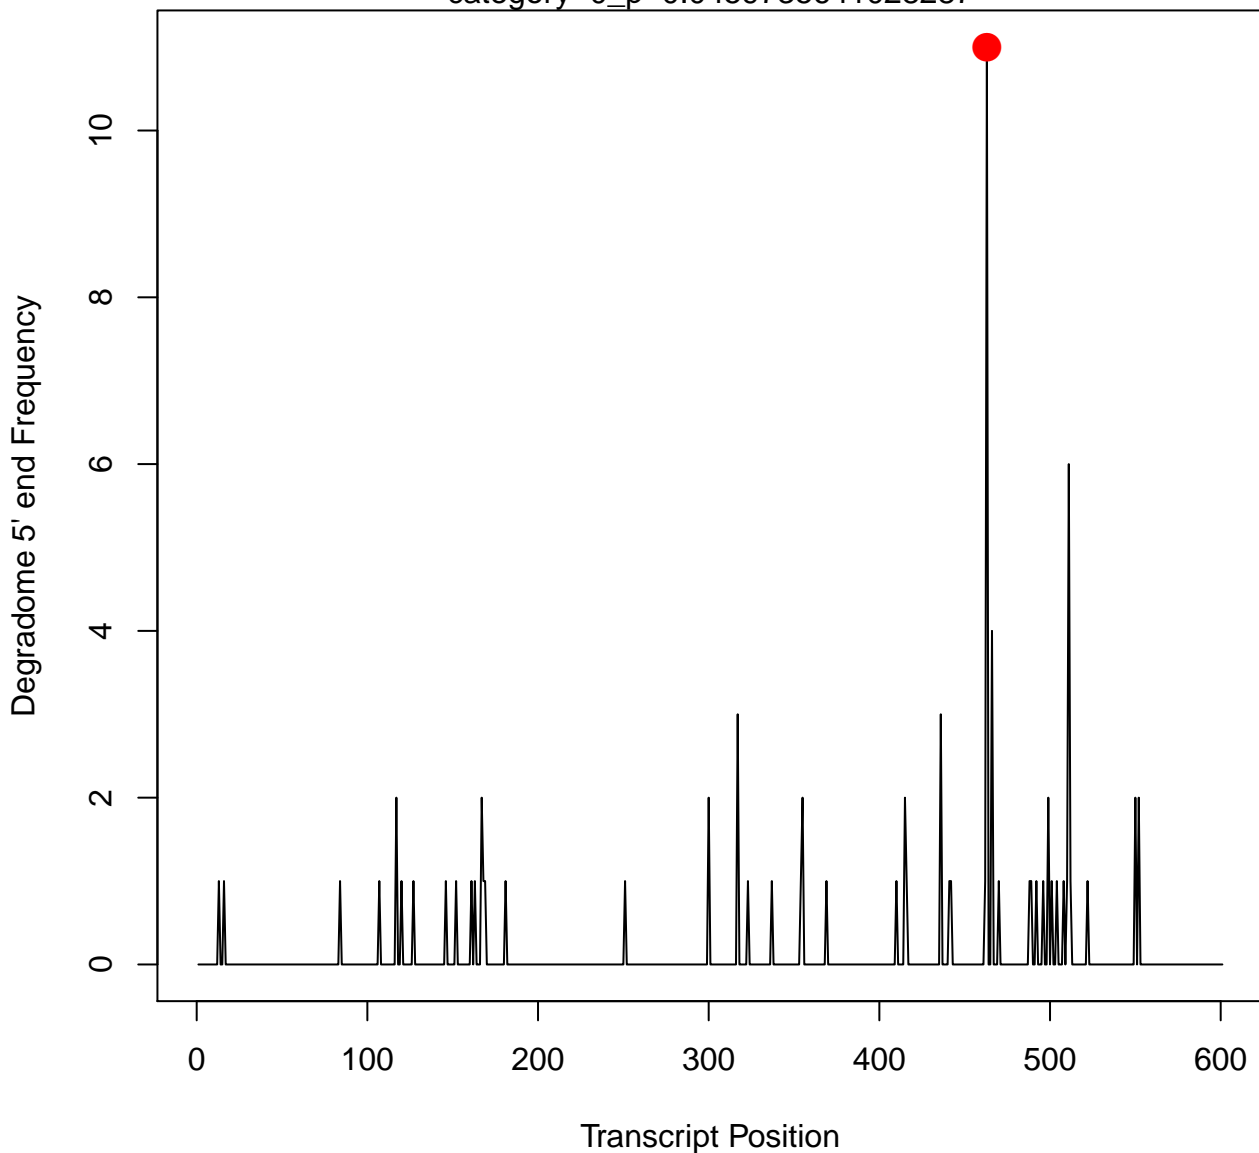

Supplement: s1 [file s1]

**T=Cluster-12032.0\_Q=pma-miR482c\_S=37**

category=0\_p=0.00027358987754178

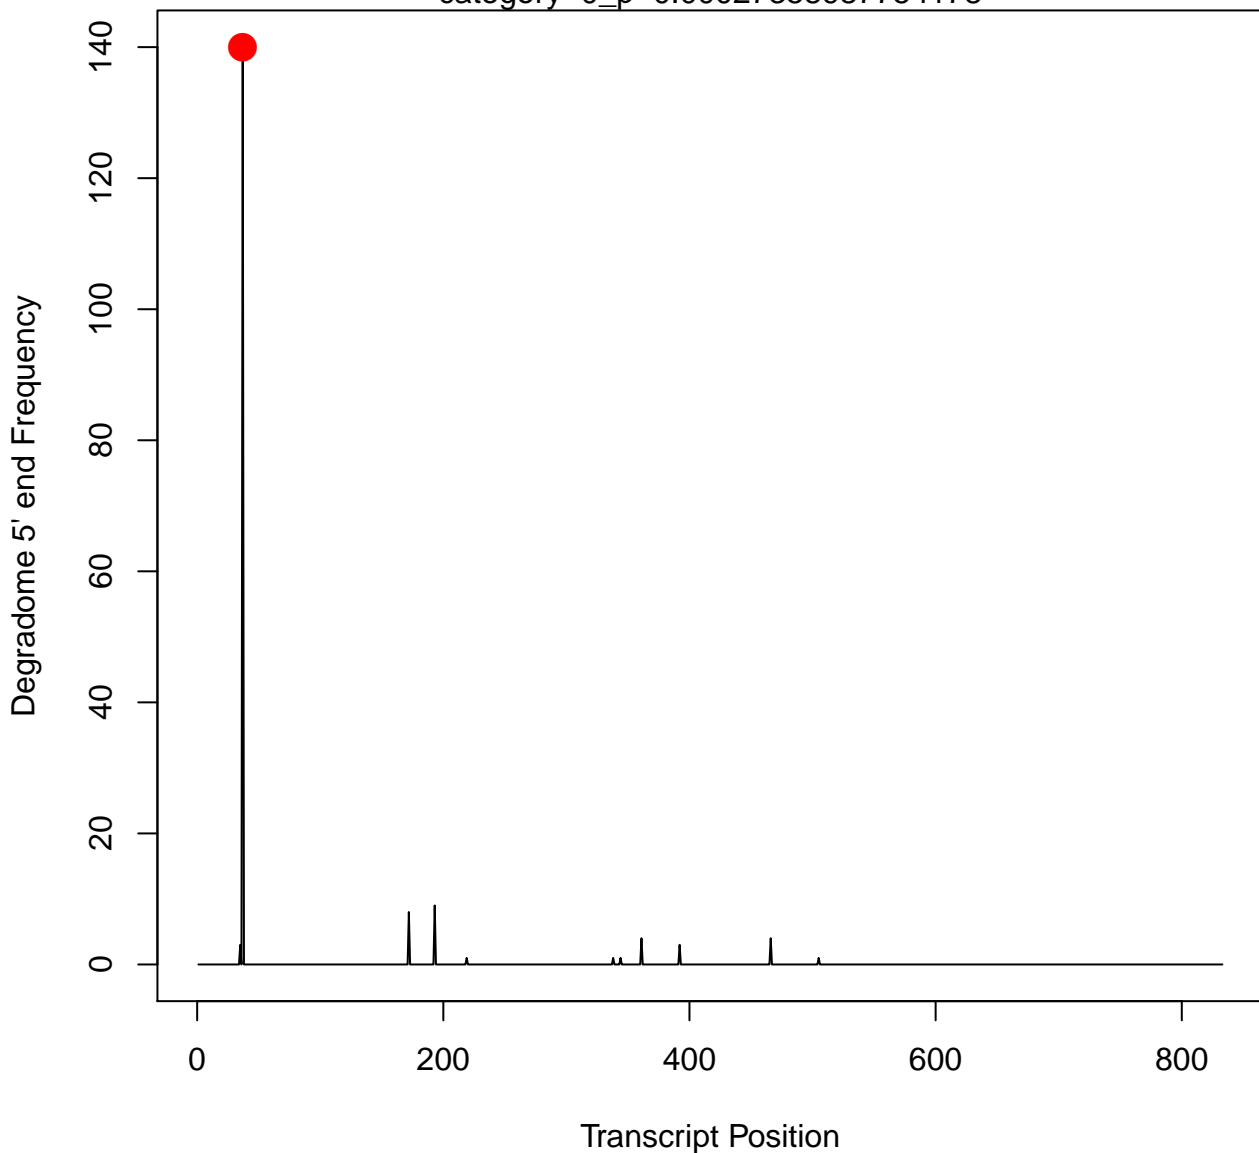

Supplement: s1 [file s1]

**T=Cluster-18410.33578\_Q=novel\_34\_S=419**

category=0\_p=0.0111560245494552

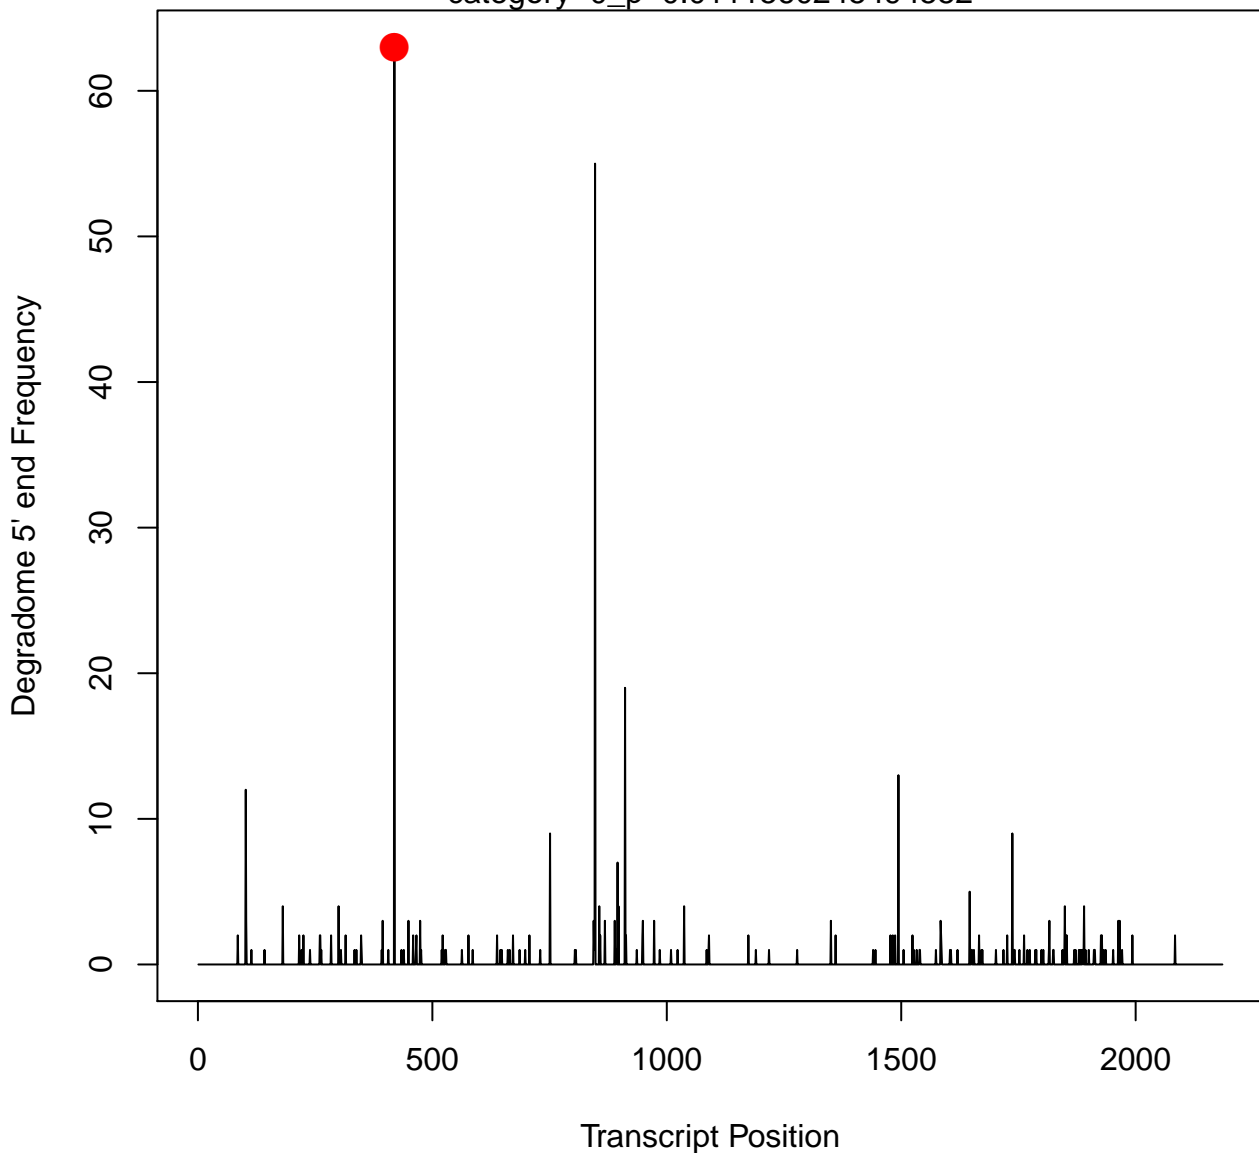

Supplement: s1 [file s1]

**T=Cluster-18410.67654\_Q=pma-miR482a\_S=344**

category=0\_p=0.0661195319906625

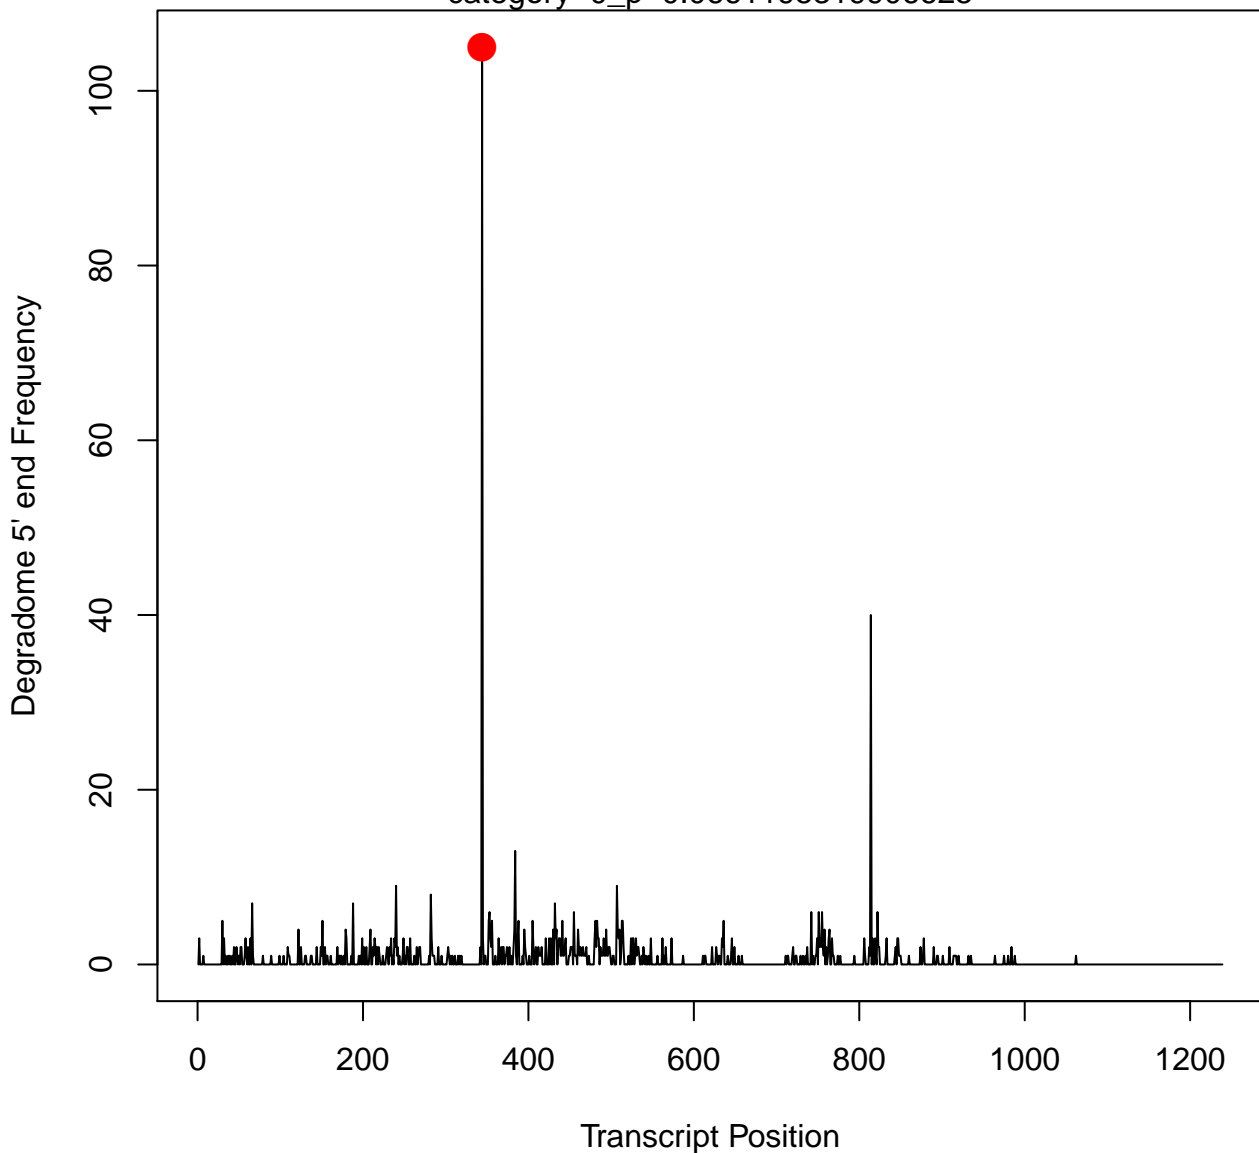

Supplement: s1 [file s1]

**T=Cluster-18410.105133\_Q=novel\_14\_S=435**

category=0\_p=0.005185427902343

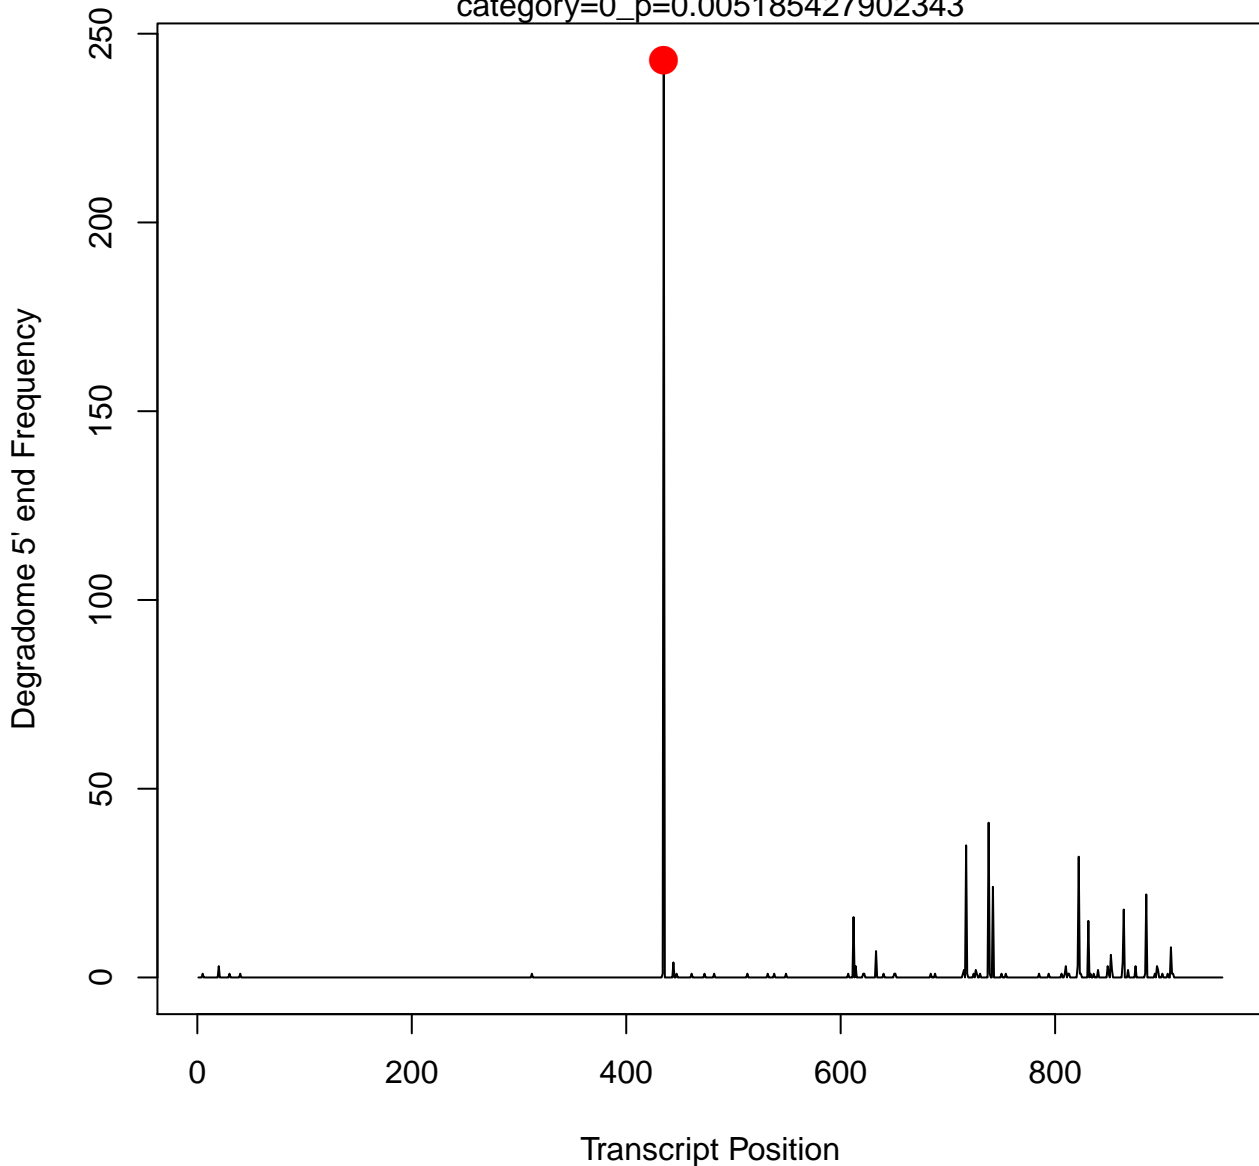

Supplement: s1 [file s1]

**T=Cluster-18410.93397\_Q=pma-miR951\_S=352**

category=0\_p=0.00436846732795781

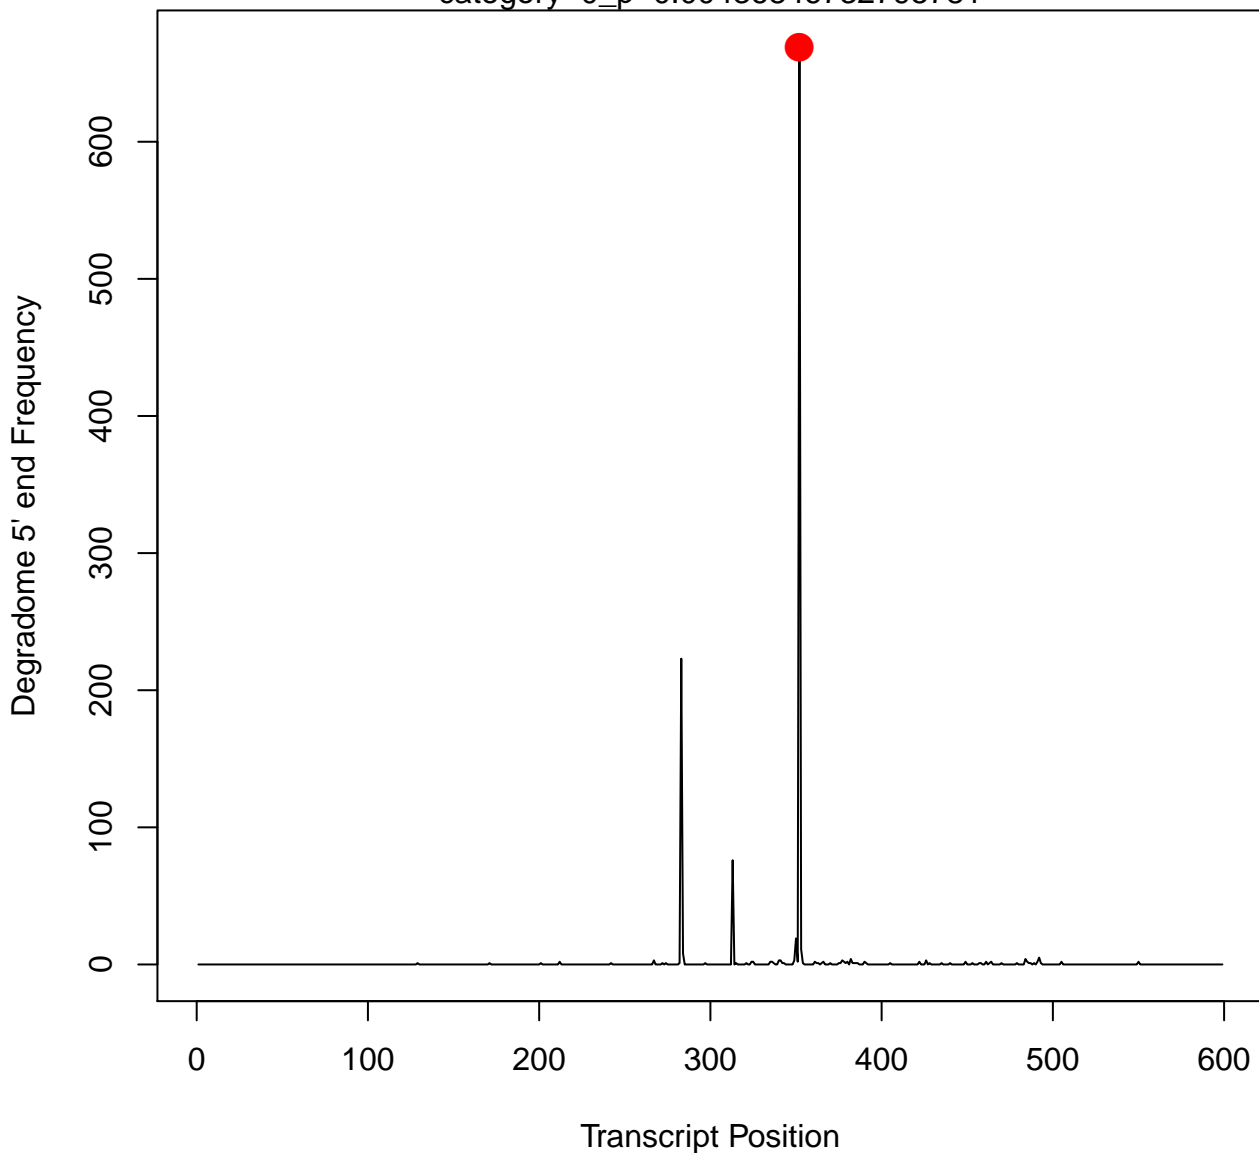

Supplement: s1 [file s1]

**T=Cluster-18410.30211\_Q=novel\_54\_S=51**

category=1\_p=0.0331300785809989

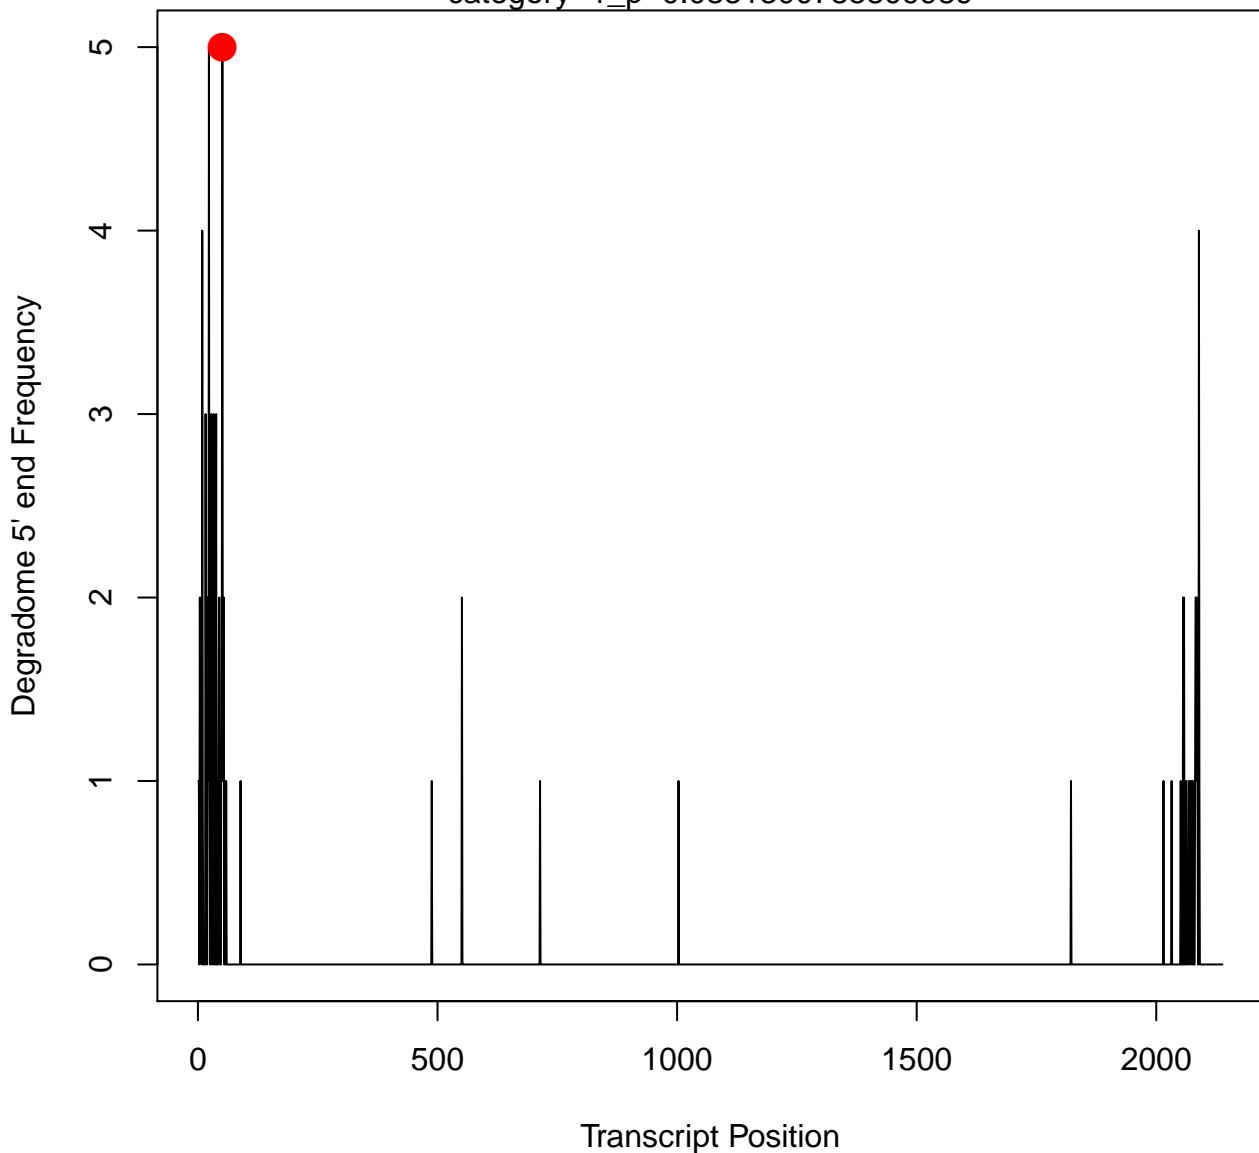

Supplement: s1 [file s1]

**T=Cluster-18410.62668\_Q=novel\_29\_S=2585**

category=0\_p=0.00464086203705827

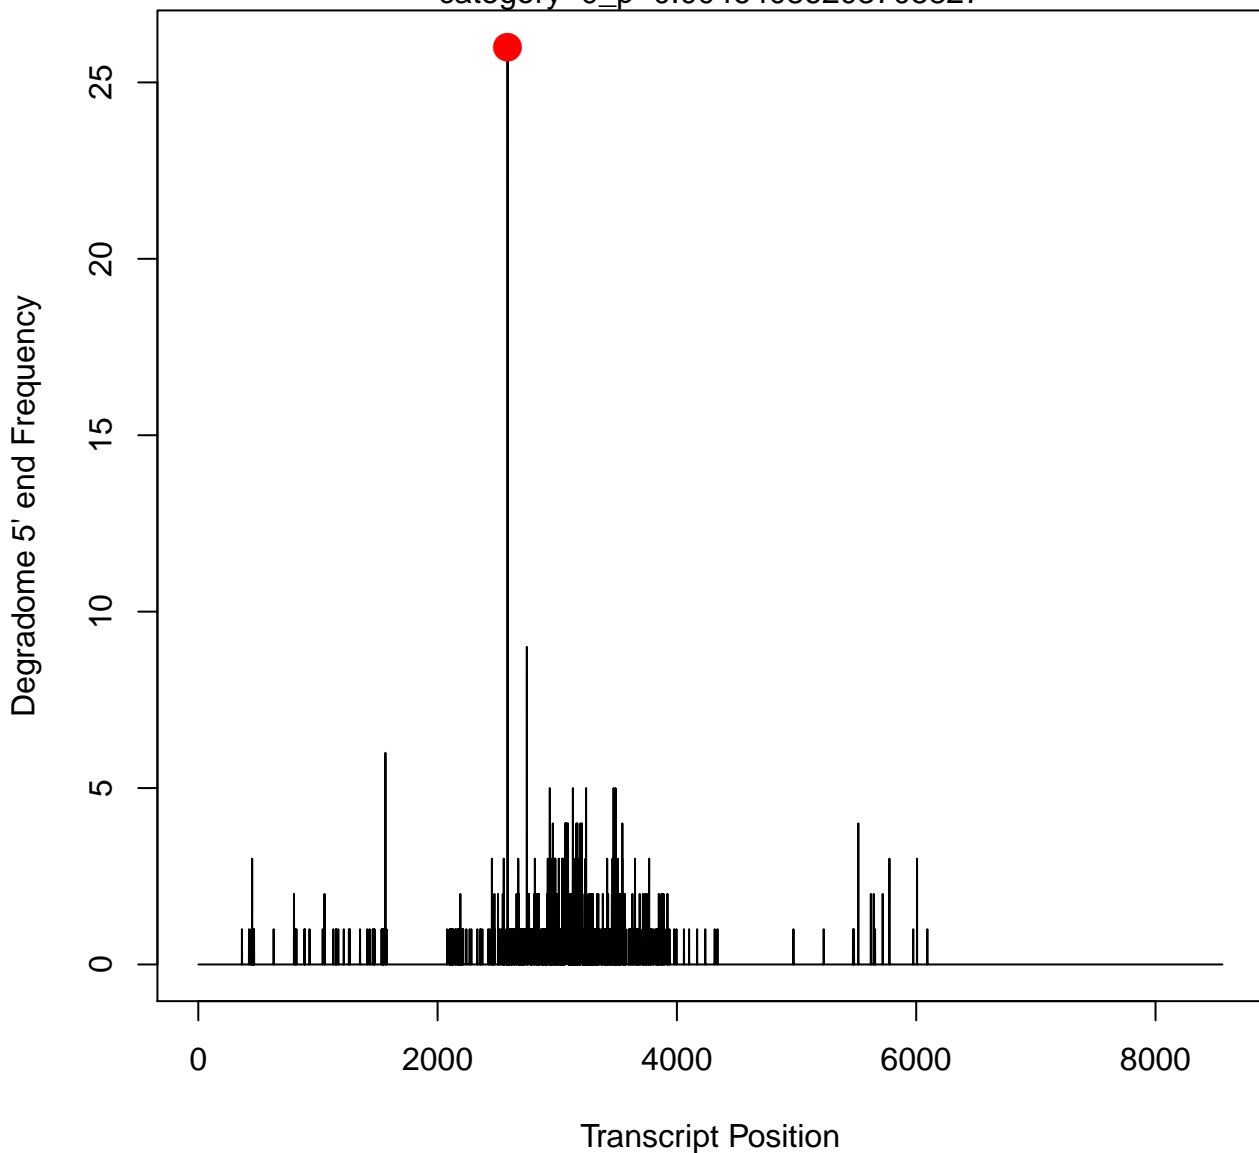

Supplement: s1 [file s1]

**T=Cluster-18410.71102\_Q=novel\_79\_S=813**

category=3\_p=0.0731750829532152

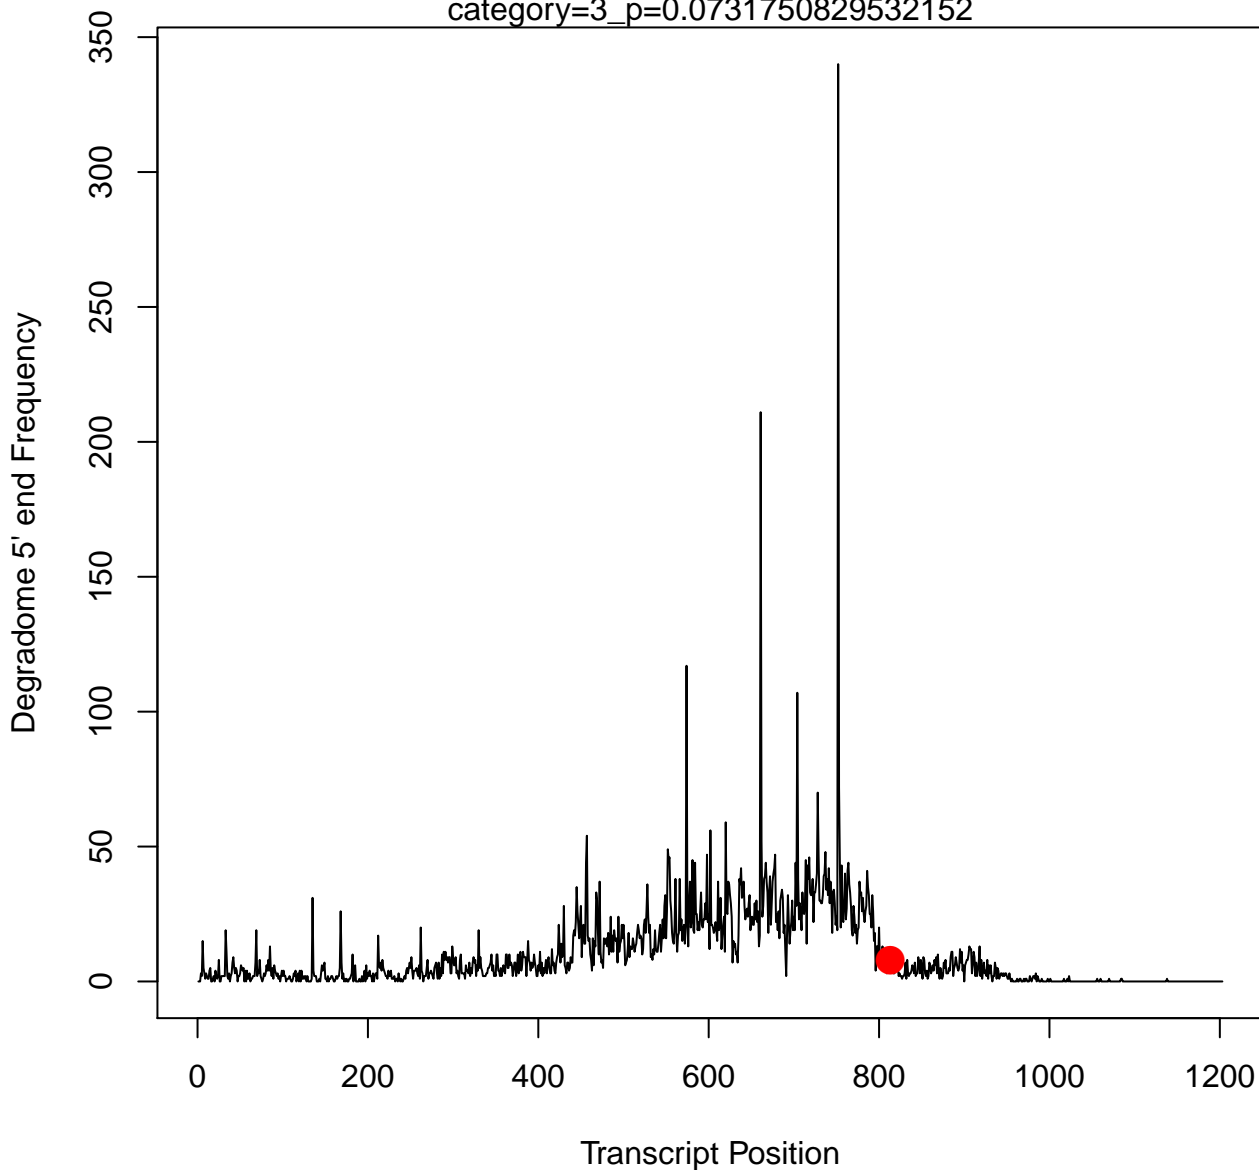

Supplement: s1 [file s1]

**T=Cluster-18410.29398\_Q=novel\_54\_S=675**

category=0\_p=0.00136720107825572

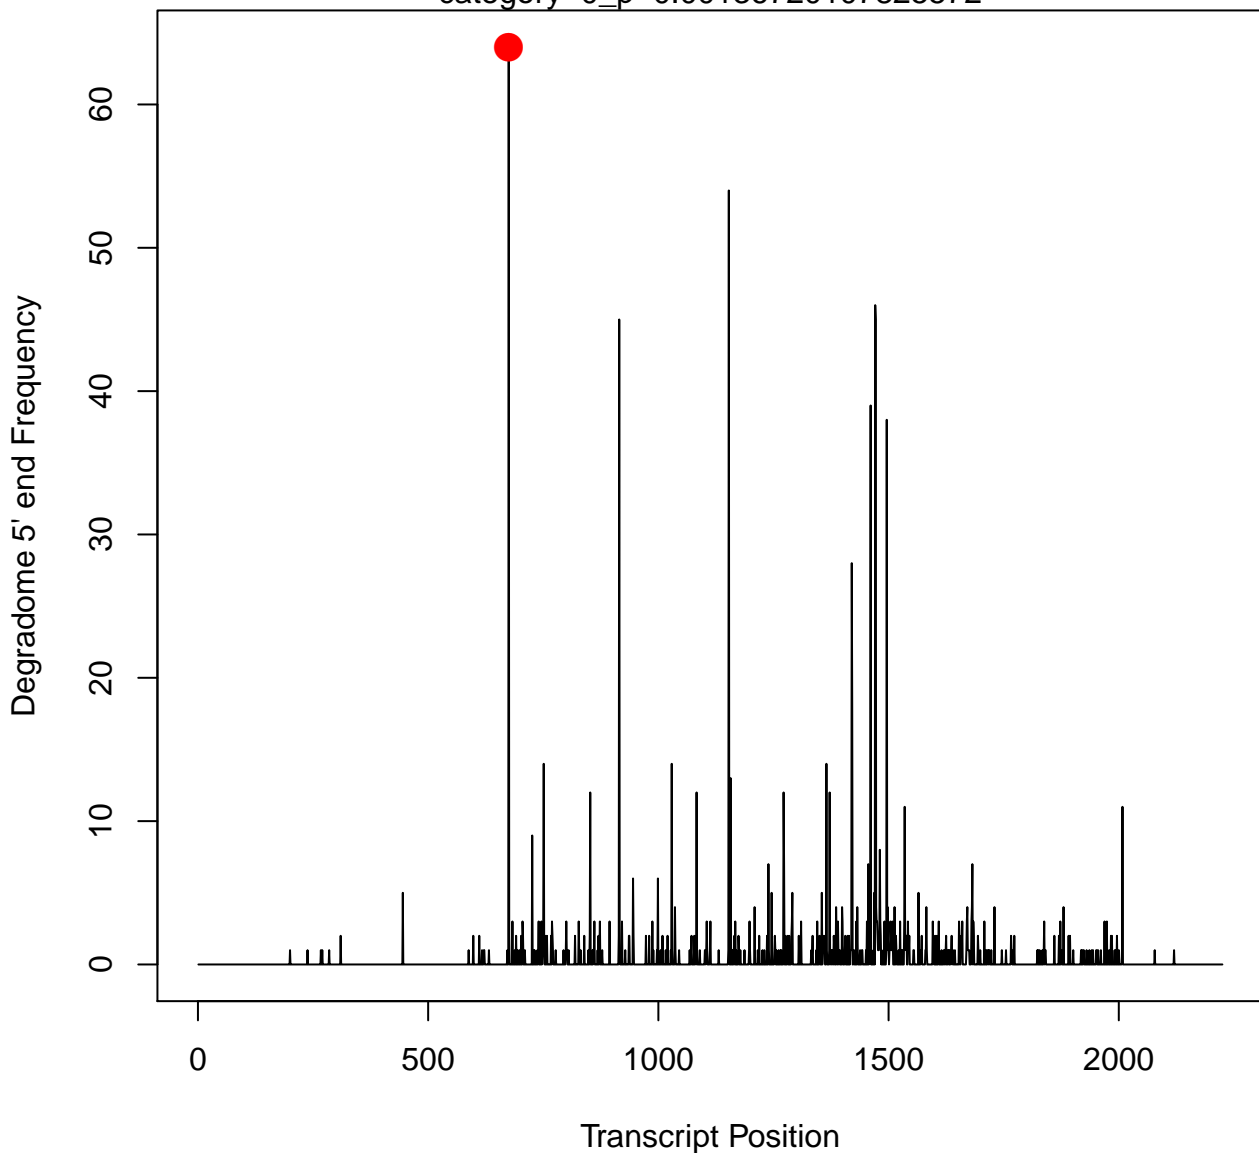

Supplement: s1 [file s1]

**T=Cluster-14024.0\_Q=novel\_21\_S=234**

category=1\_p=0.0295038382736338

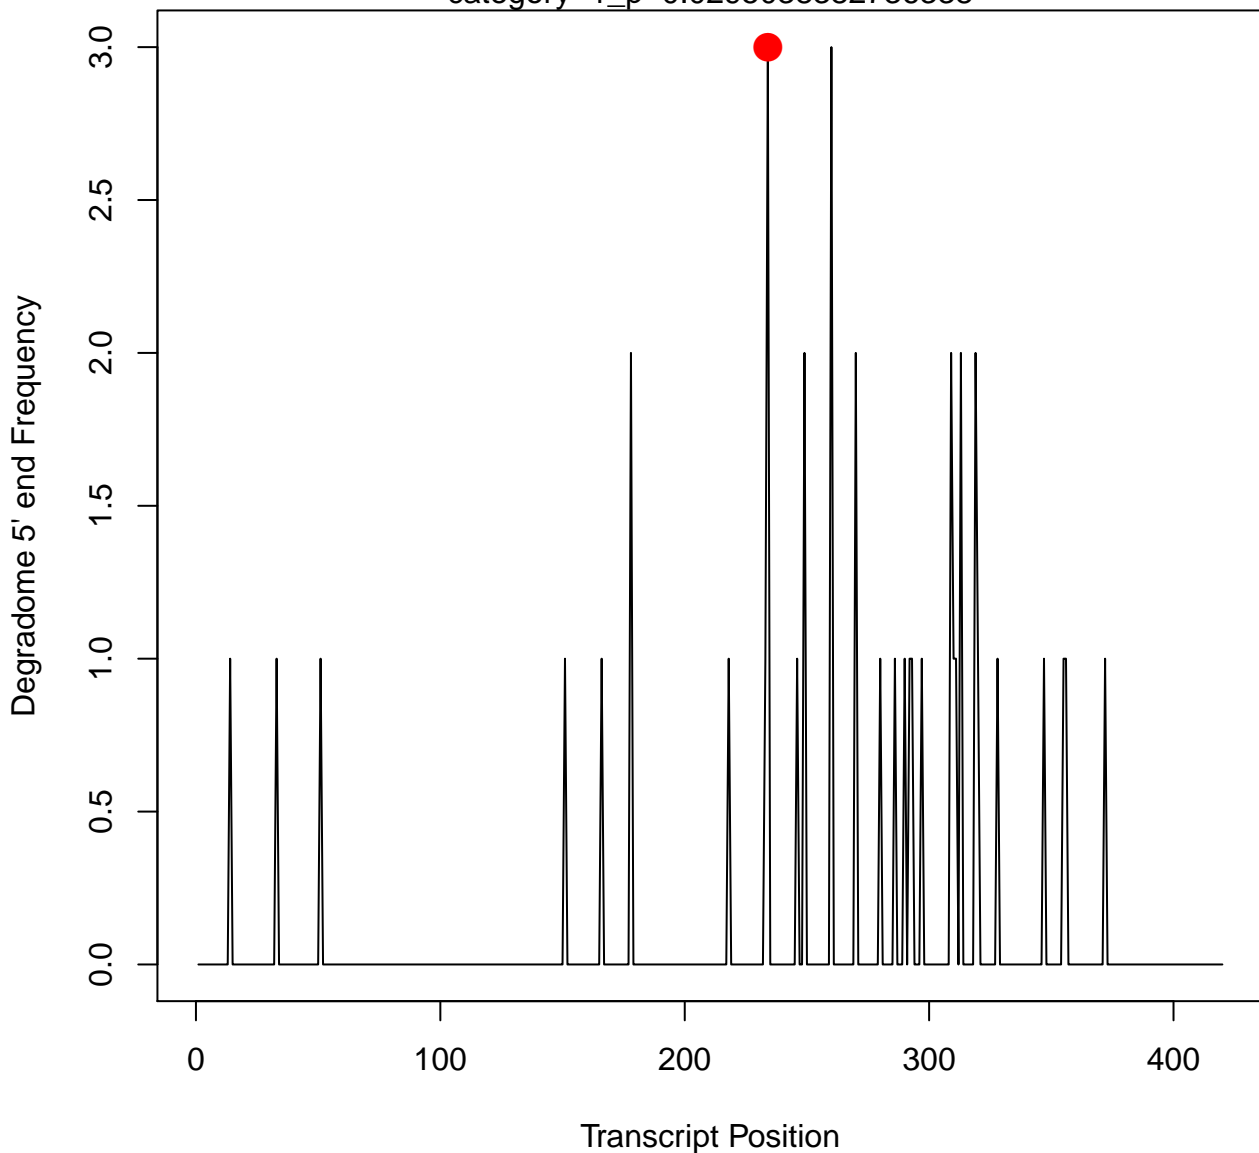

Supplement: s1 [file s1]

**T=Cluster-18410.63358\_Q=novel\_127\_S=453**

category=3\_p=0.0320427934108476

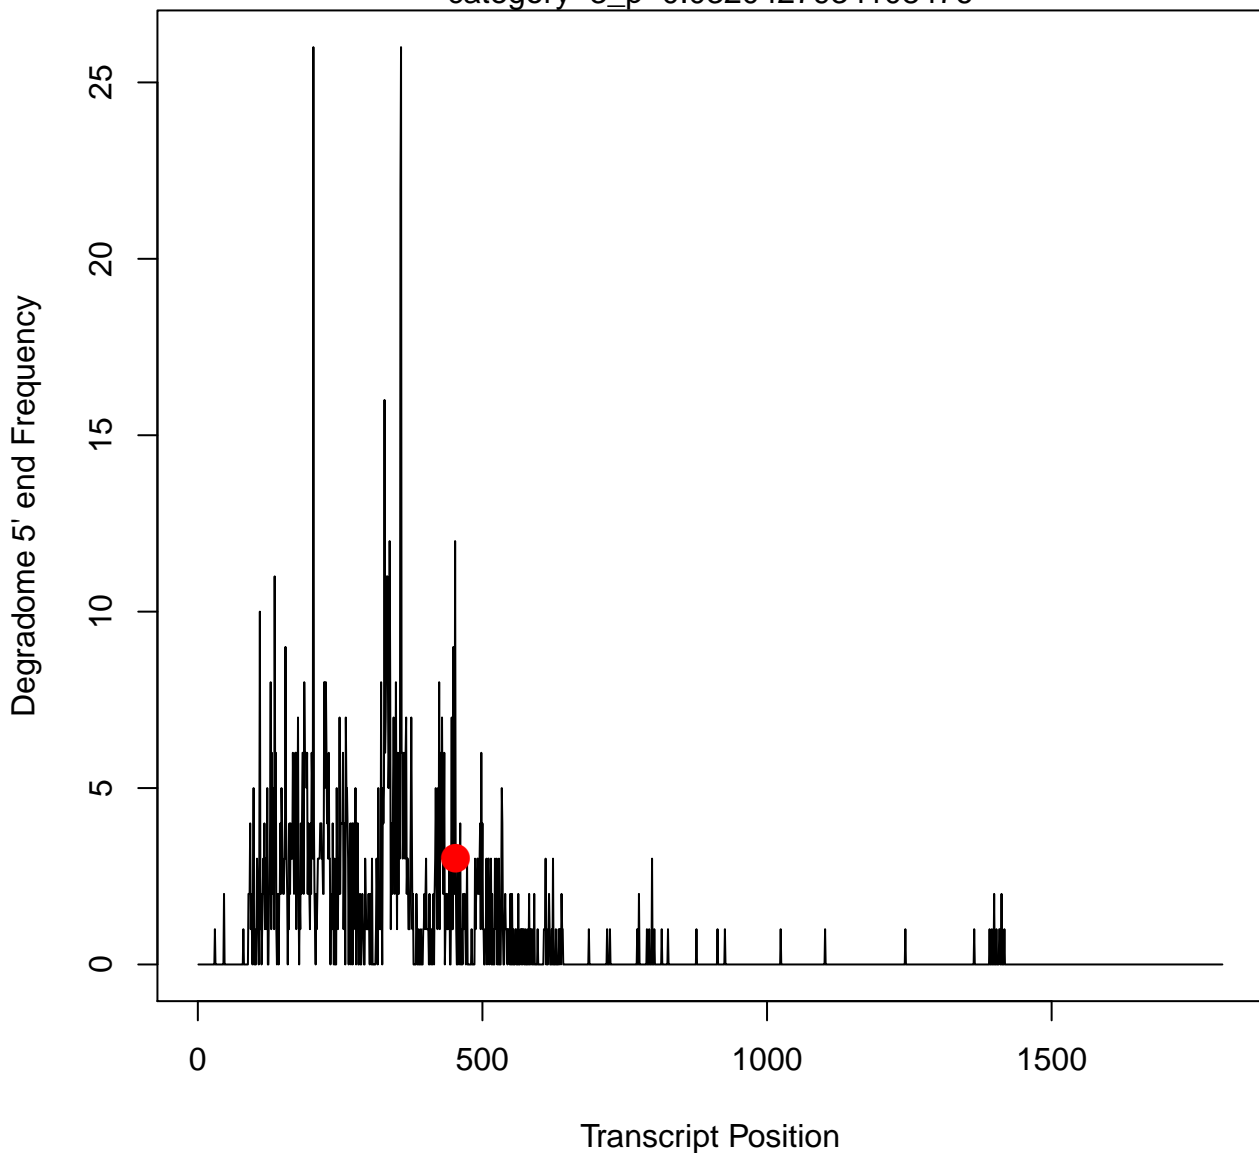

Supplement: s1 [file s1]

**T=Cluster-18410.27442\_Q=novel\_47\_S=367**

category=0\_p=0.0135882009795663

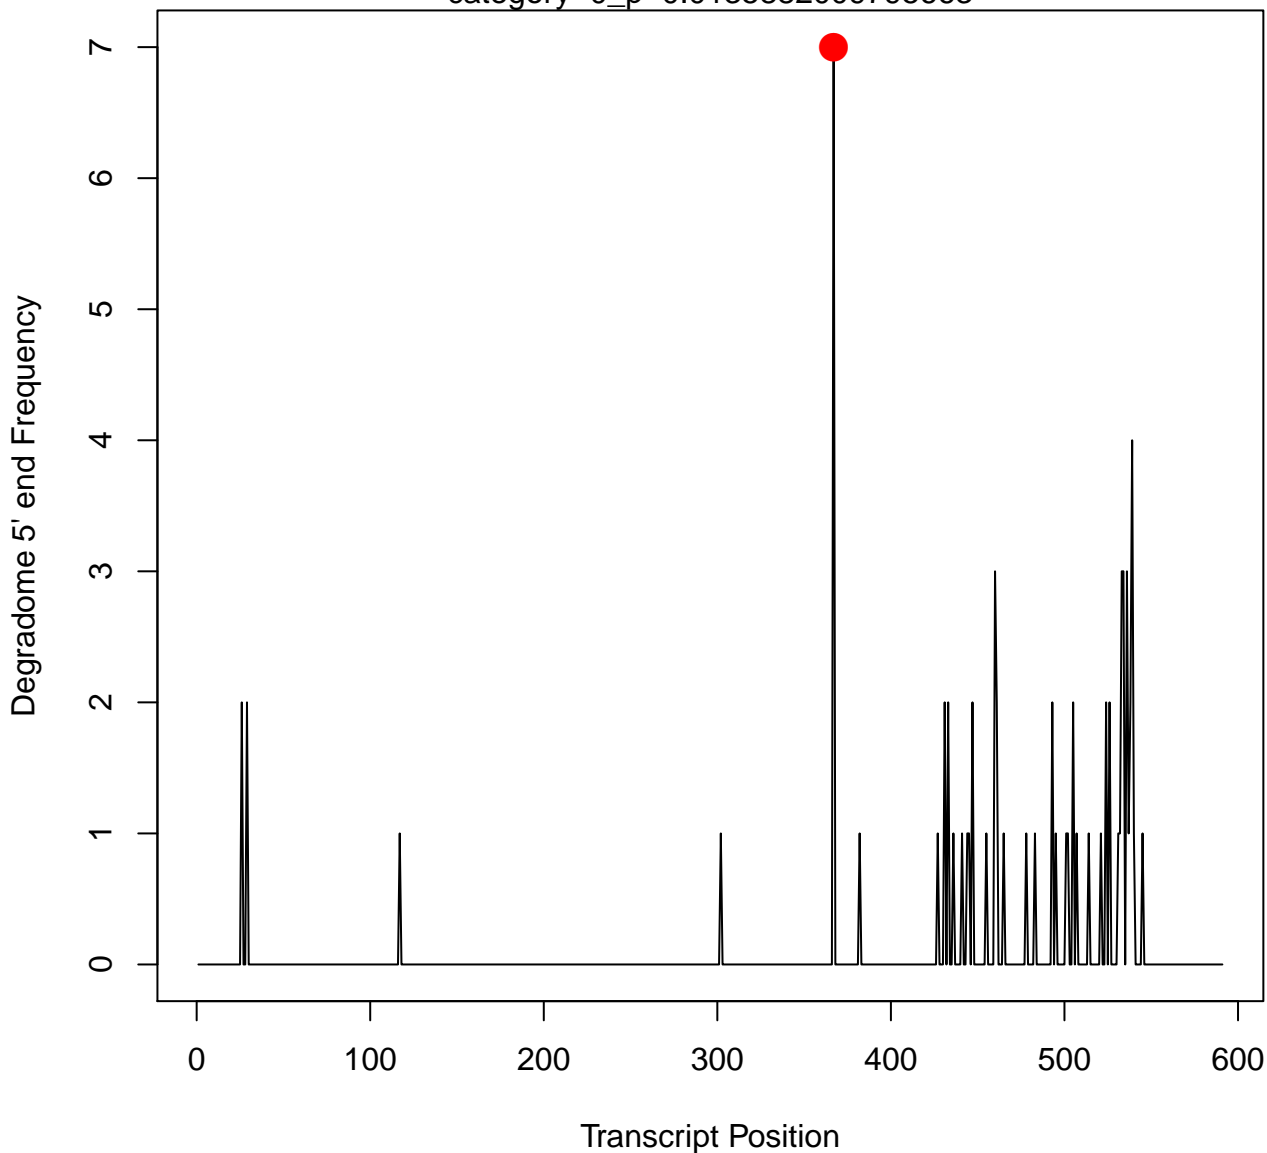

Supplement: s1 [file s1]

**T=Cluster-18410.8835\_Q=novel\_82\_S=525**

category=1\_p=0.0173178600754796

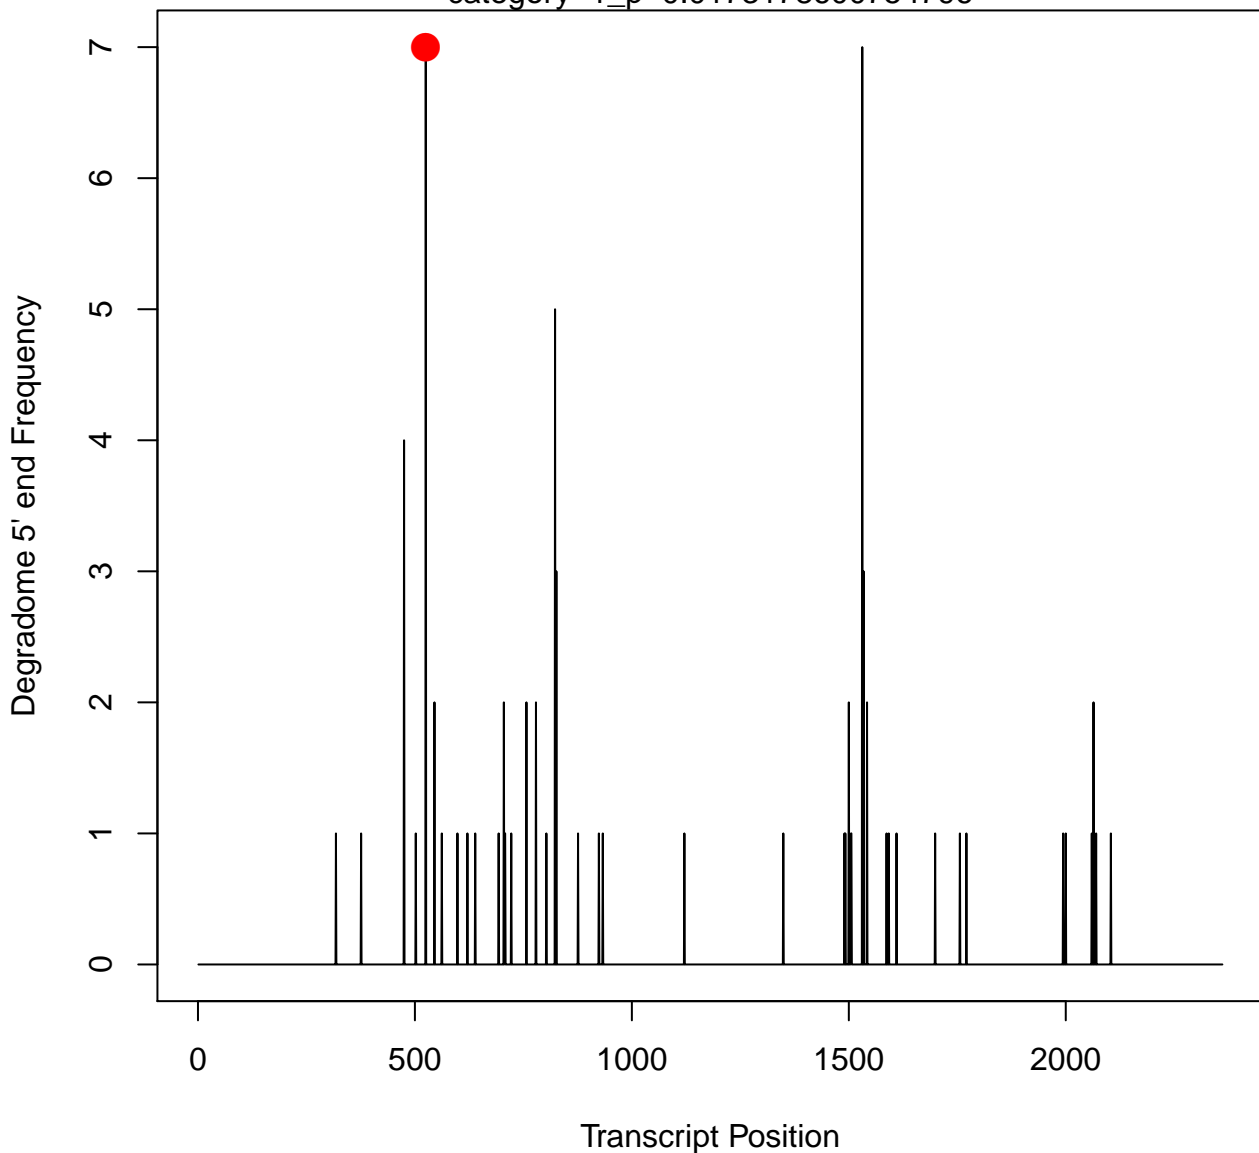

Supplement: s1 [file s1]

**T=Cluster-18410.112460\_Q=novel\_168\_S=245**

category=3\_p=0.0424939132250566

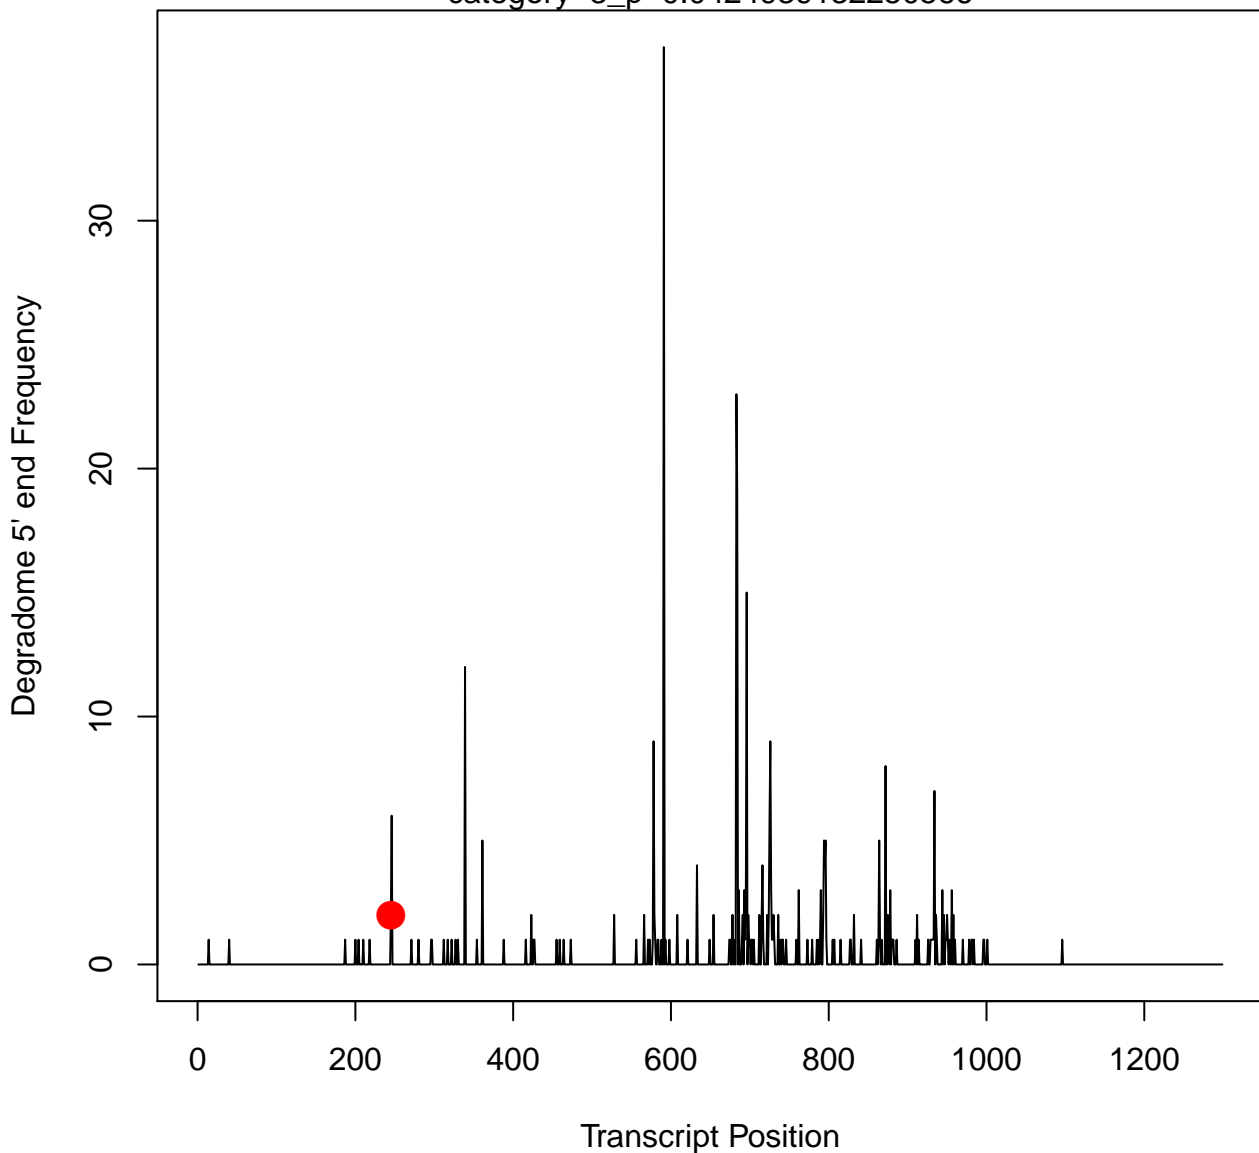

Supplement: s1 [file s1]

**T=Cluster-18410.63536\_Q=novel\_54\_S=42**

category=2\_p=0.0992668787568005

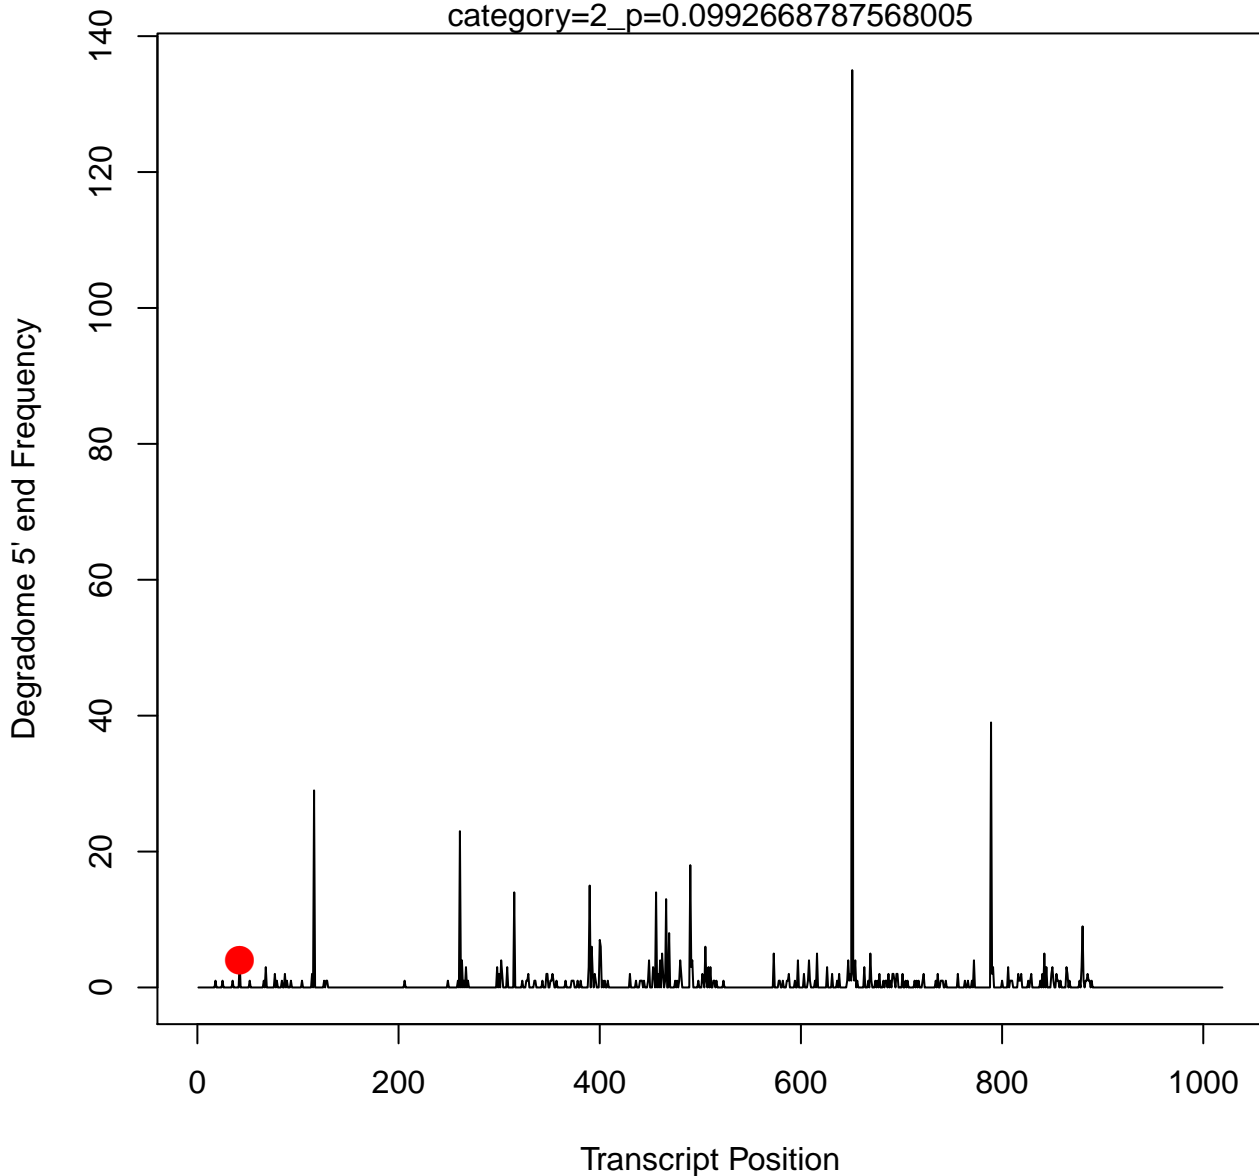

Supplement: s1 [file s1]

**T=Cluster-18410.59035\_Q=pma-miR166c\_S=69**

category=0\_p=0.00027358987754178

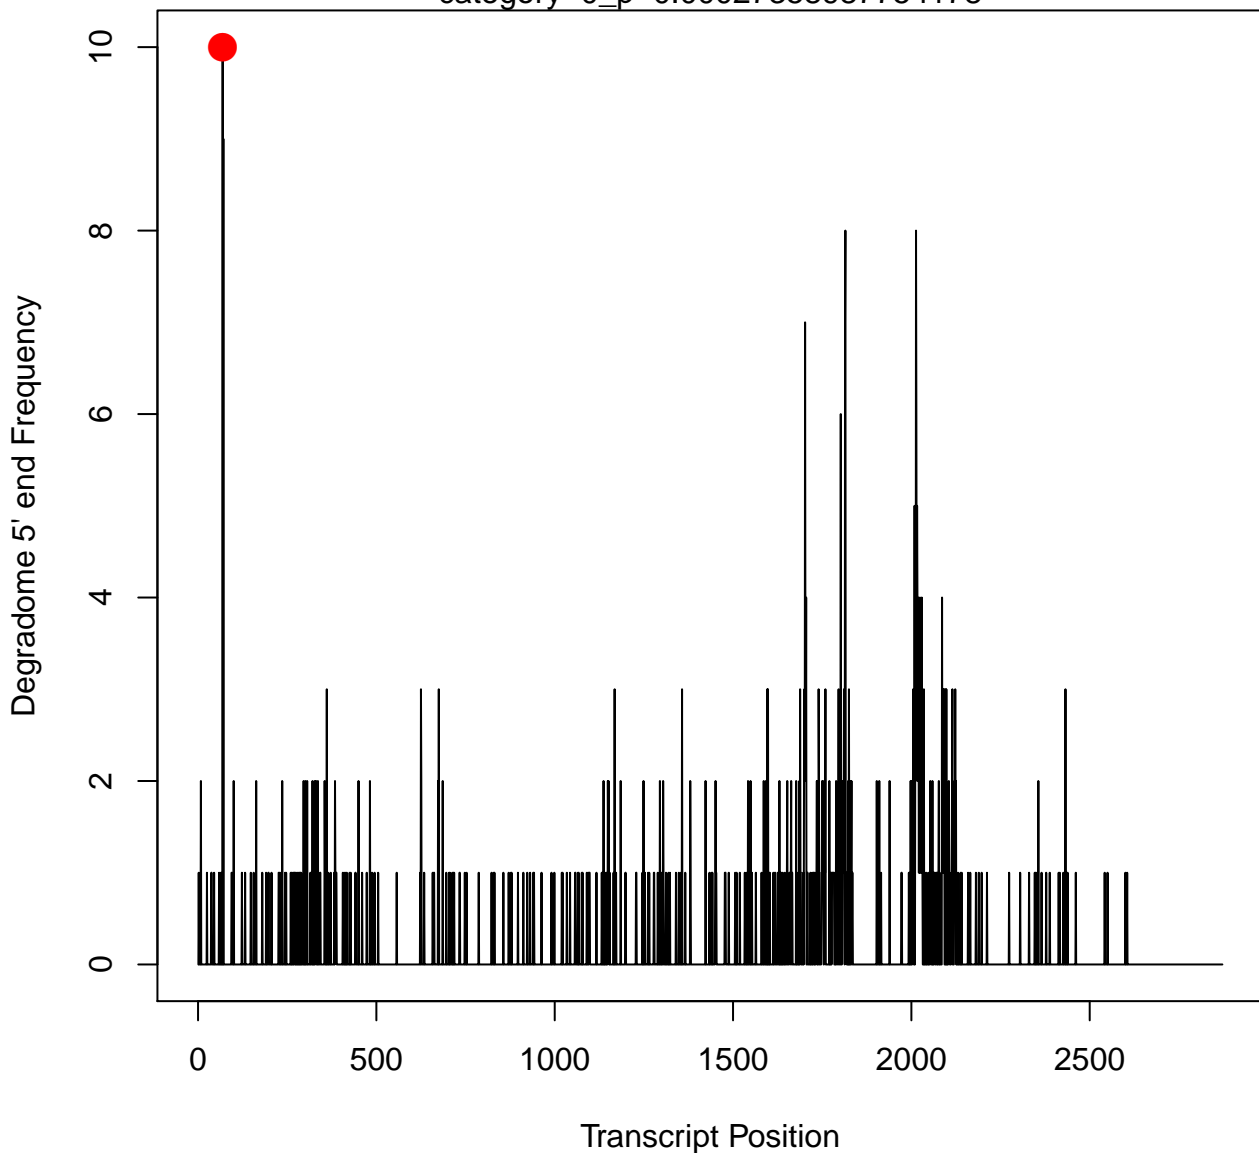

Supplement: s1 [file s1]

**T=Cluster-23154.0\_Q=pma-miR949\_S=178**

category=0\_p=0.00572969583297245

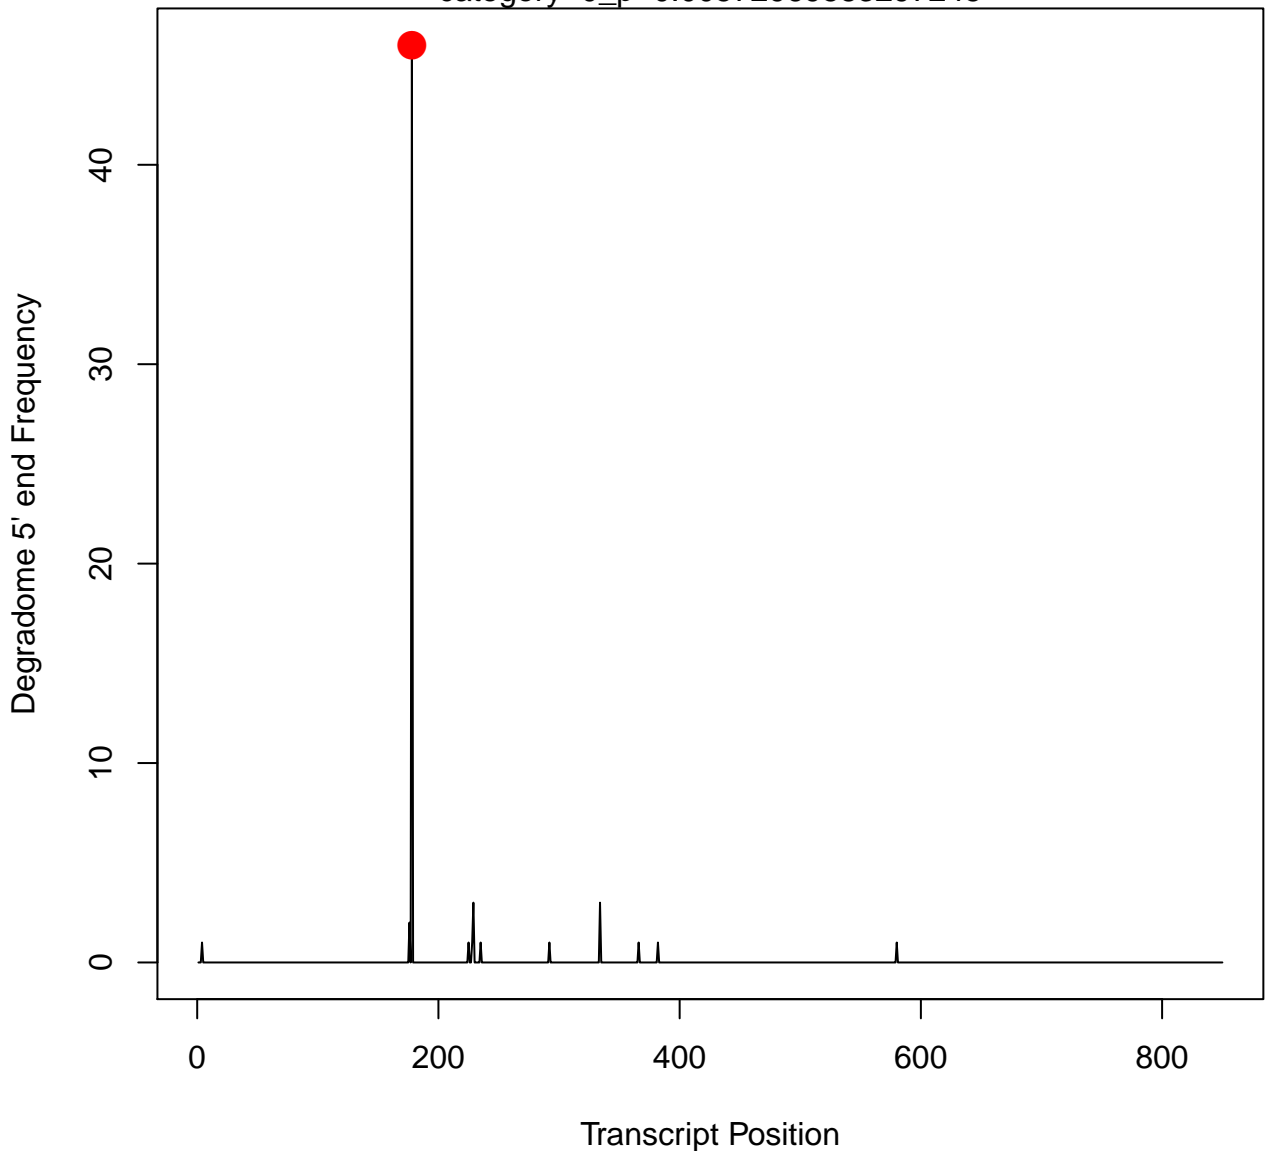

Supplement: s1 [file s1]

**T=Cluster-18410.68239\_Q=novel\_2\_S=330**

category=2\_p=0.0887427285779705

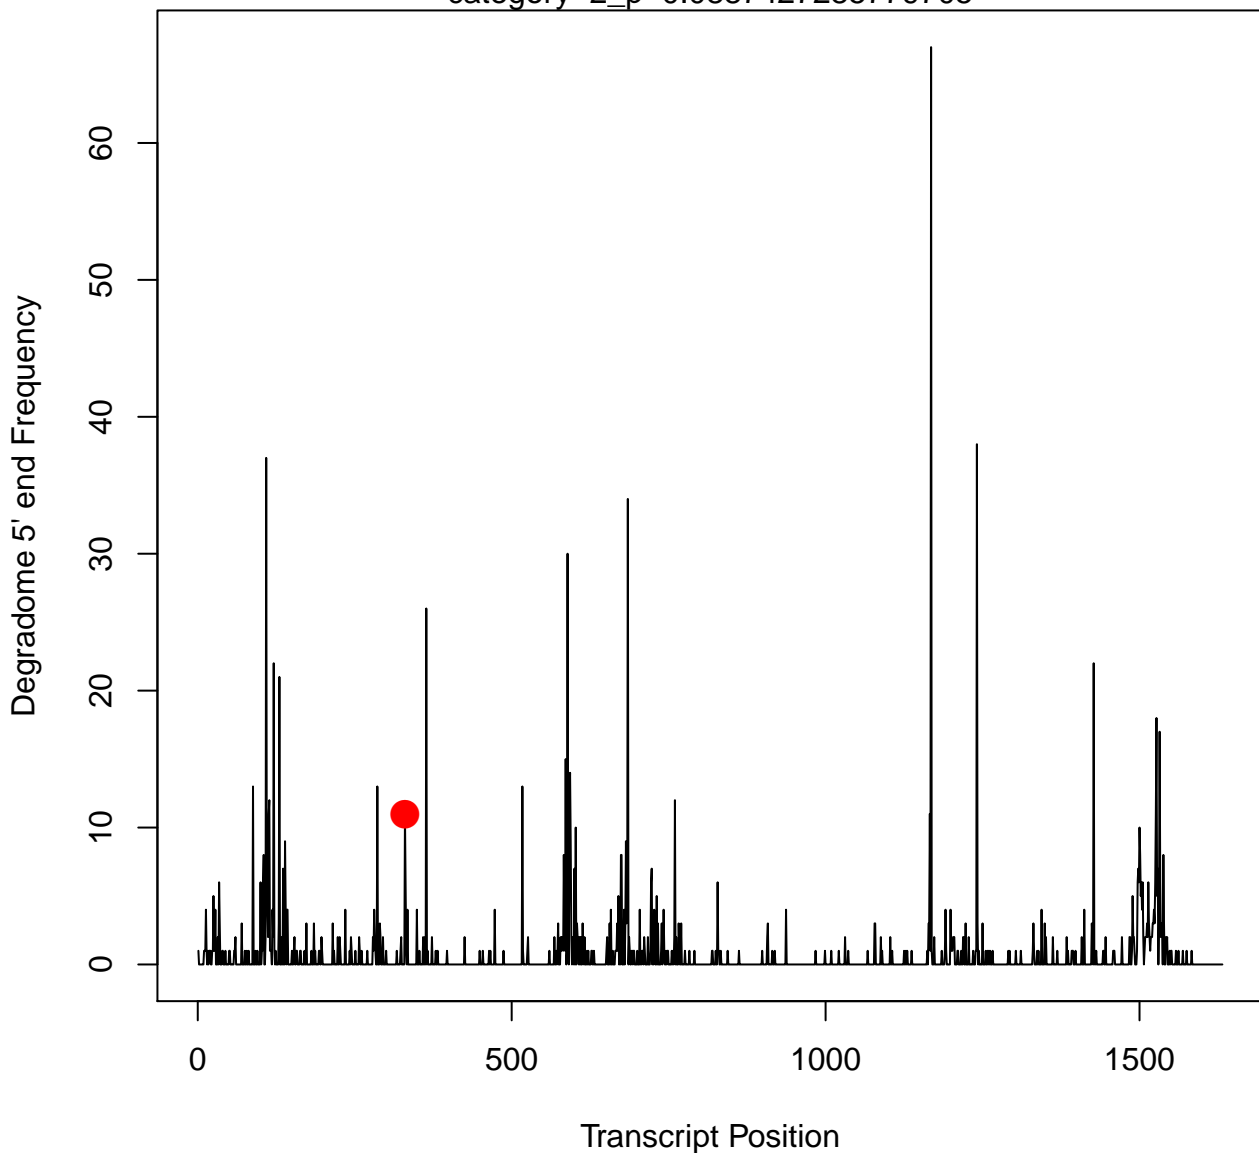

Supplement: s1 [file s1]

**T=Cluster-18410.73415\_Q=novel\_153\_S=128**

category=4\_p=0.024452609380235

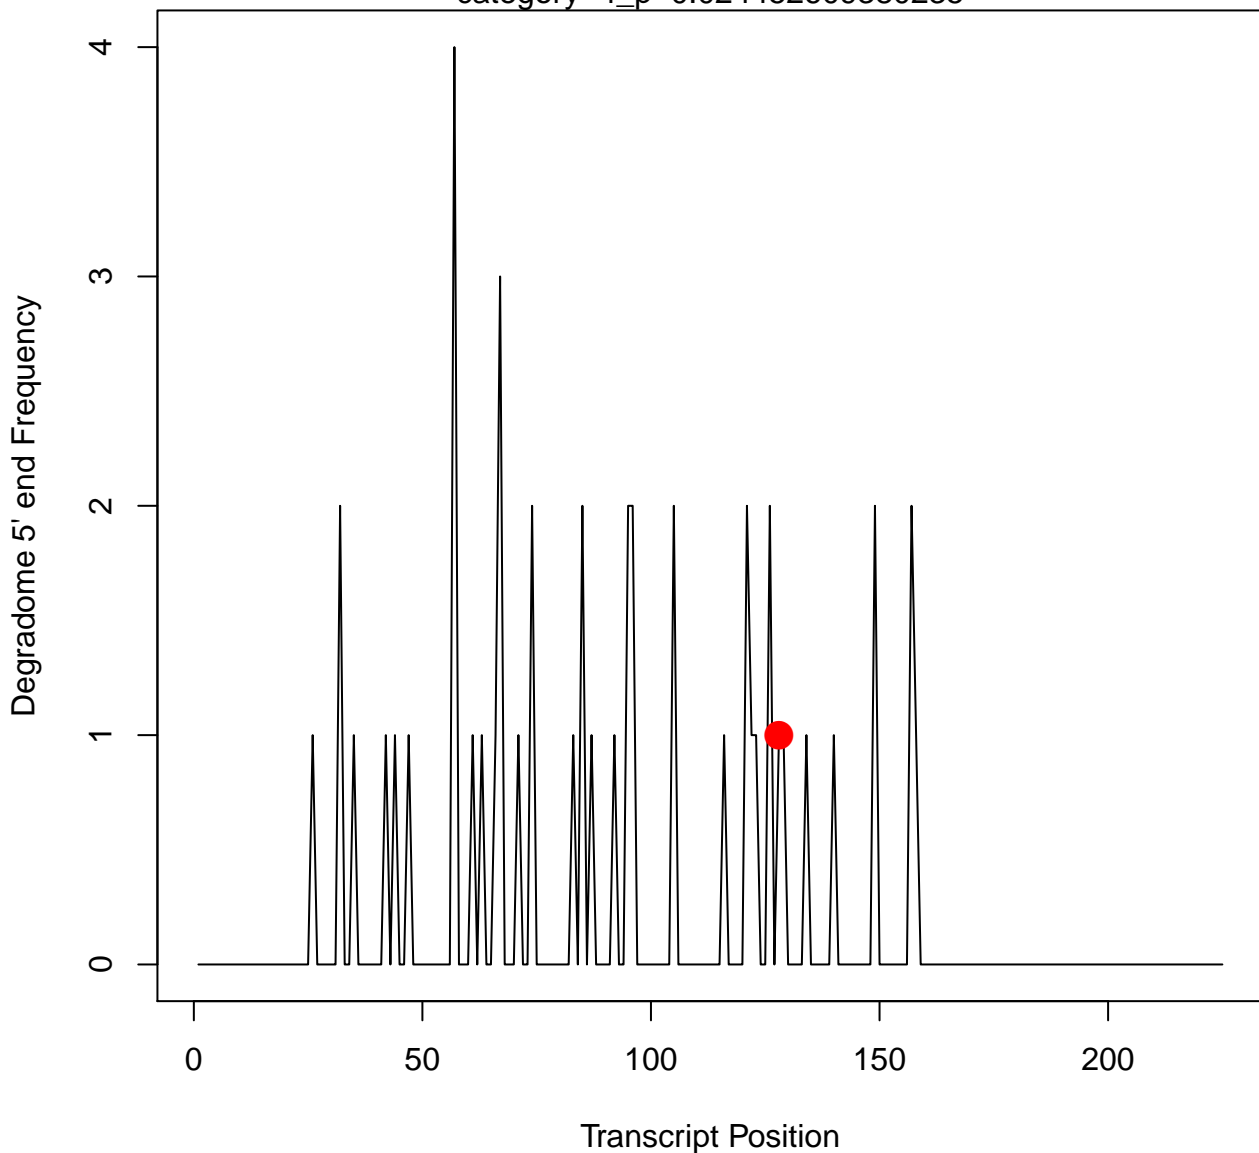

Supplement: s1 [file s1]

**T=Cluster-18410.13300\_Q=novel\_27\_S=201**

category=1\_p=0.0307140936620628

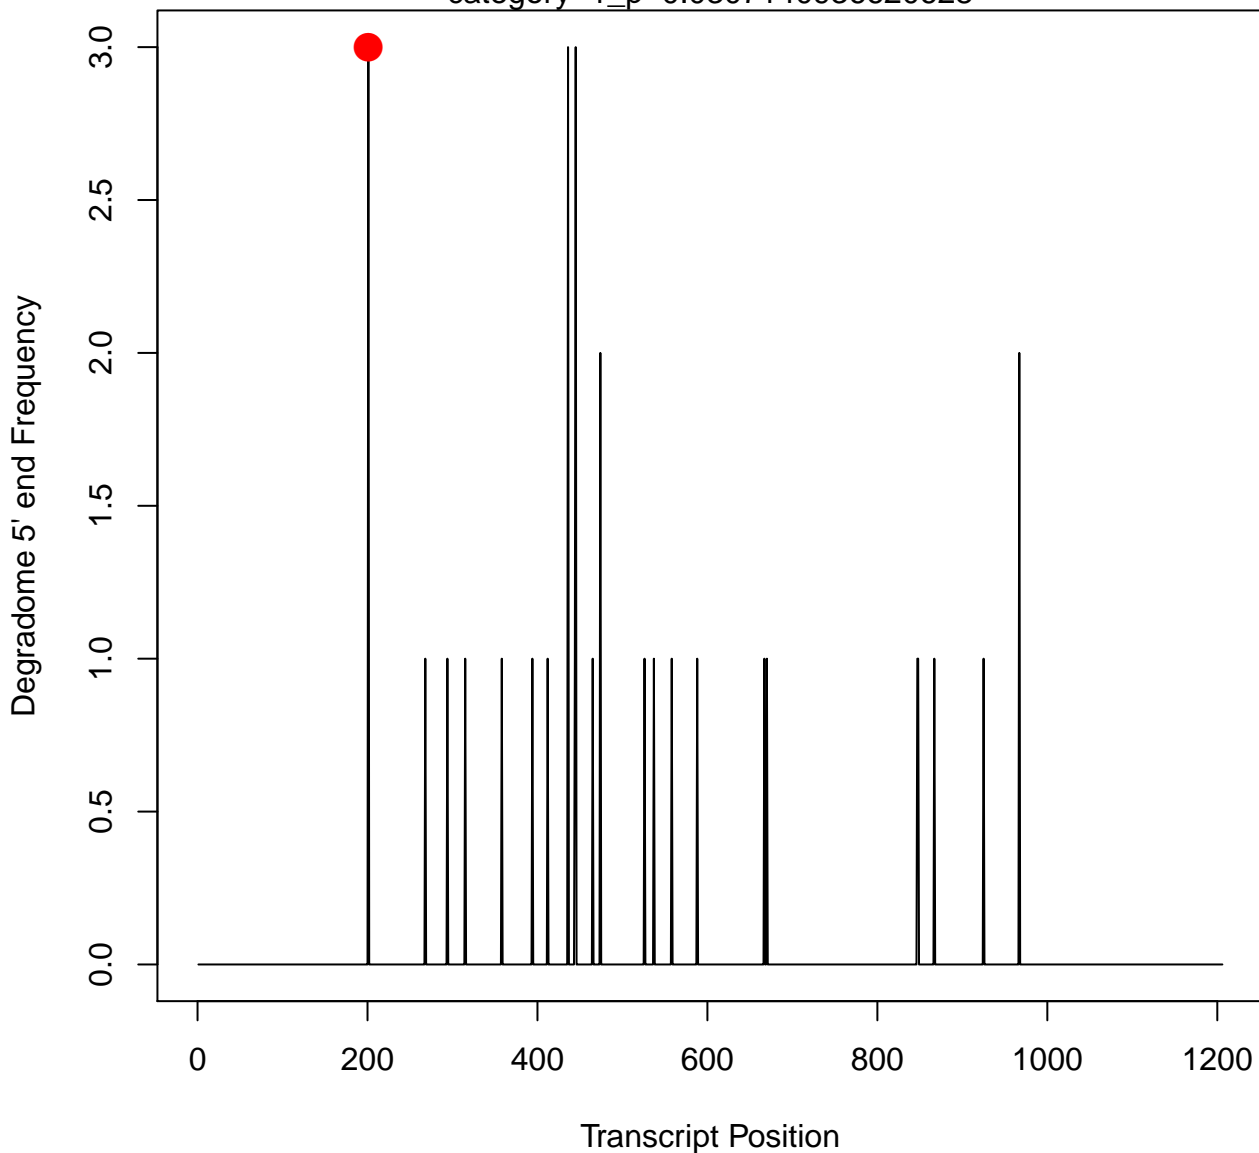

Supplement: s1 [file s1]

**T=Cluster-18410.83537\_Q=pma-miR482a\_S=104**

category=0\_p=0.0040959980740275

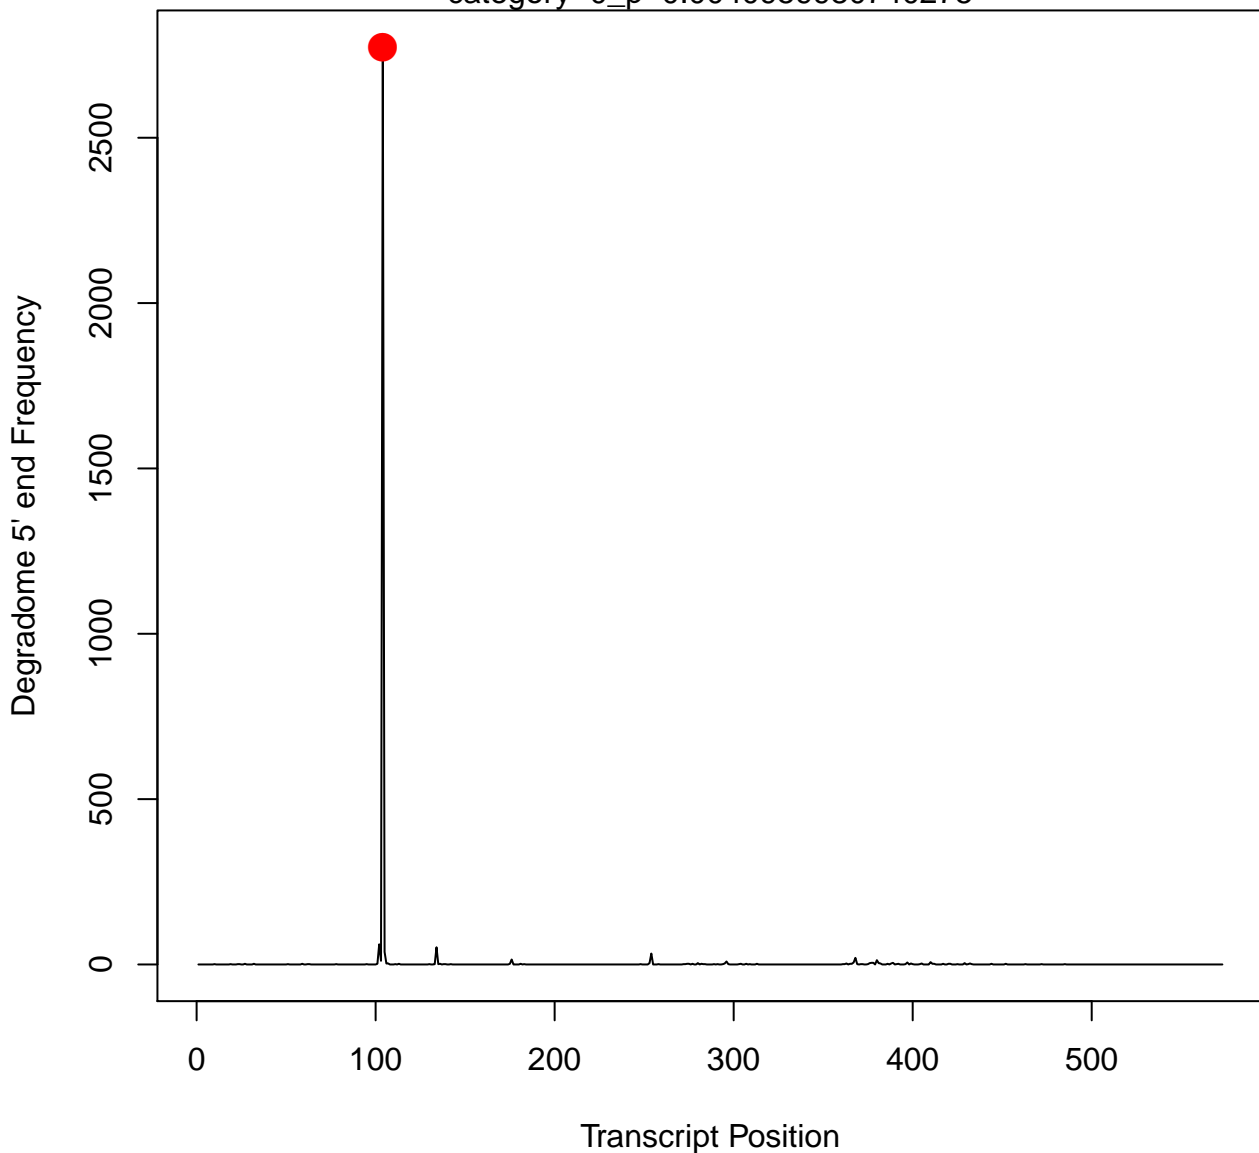

Supplement: s1 [file s1]

**T=Cluster-18410.27421\_Q=novel\_28\_S=107**

category=0\_p=0.000820545098840553

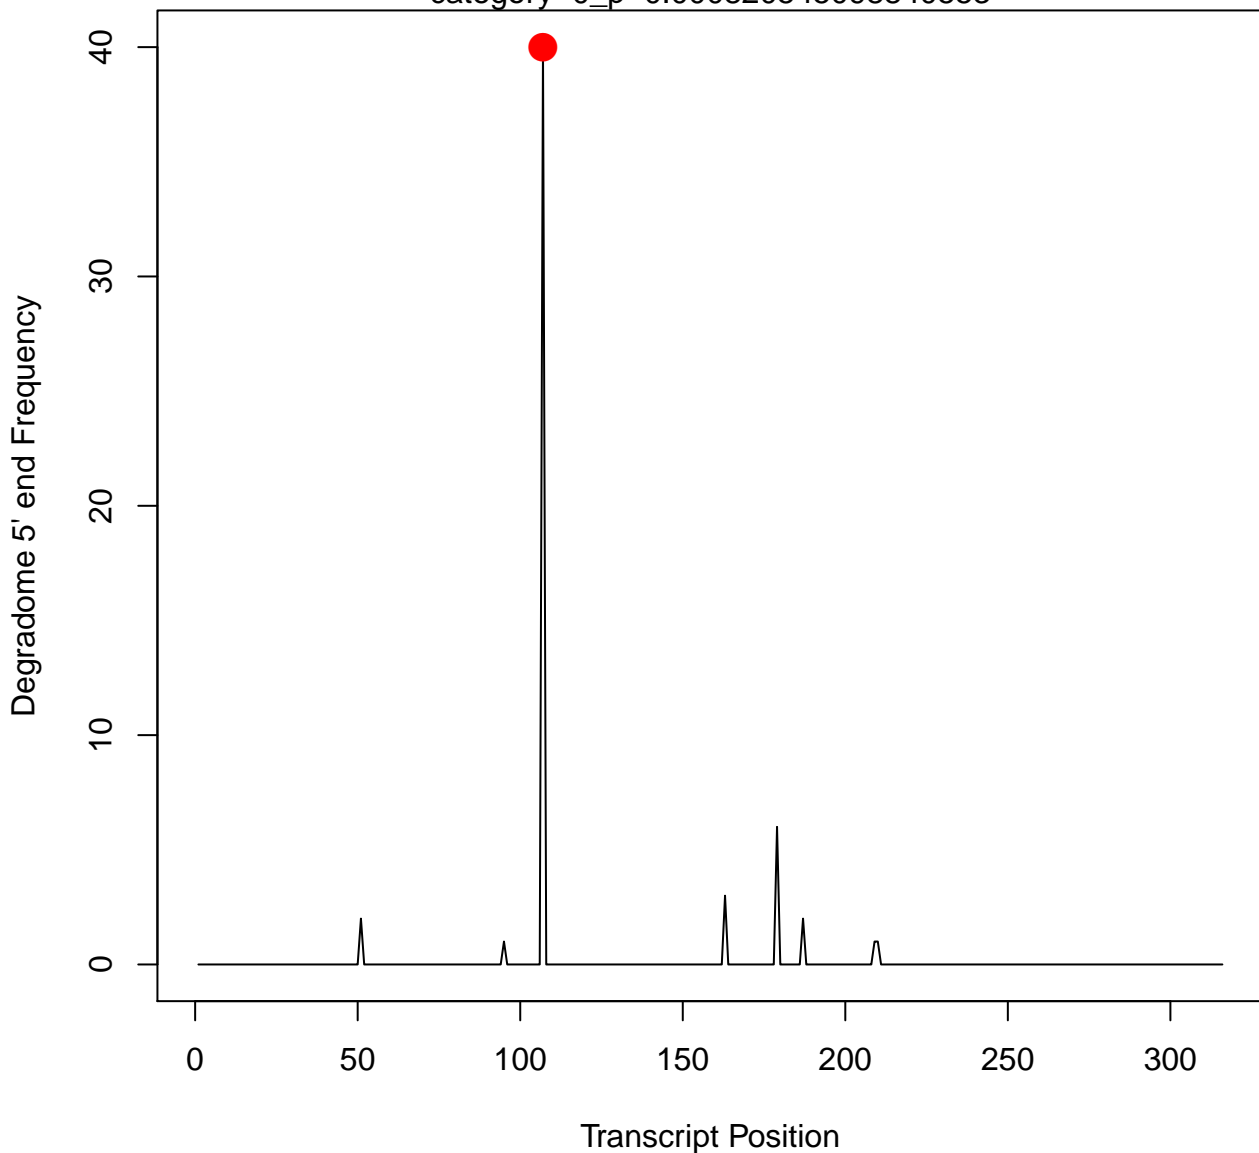

Supplement: s1 [file s1]

**T=Cluster-18410.22921\_Q=novel\_10\_S=693**

category=0\_p=0.00763228970729513

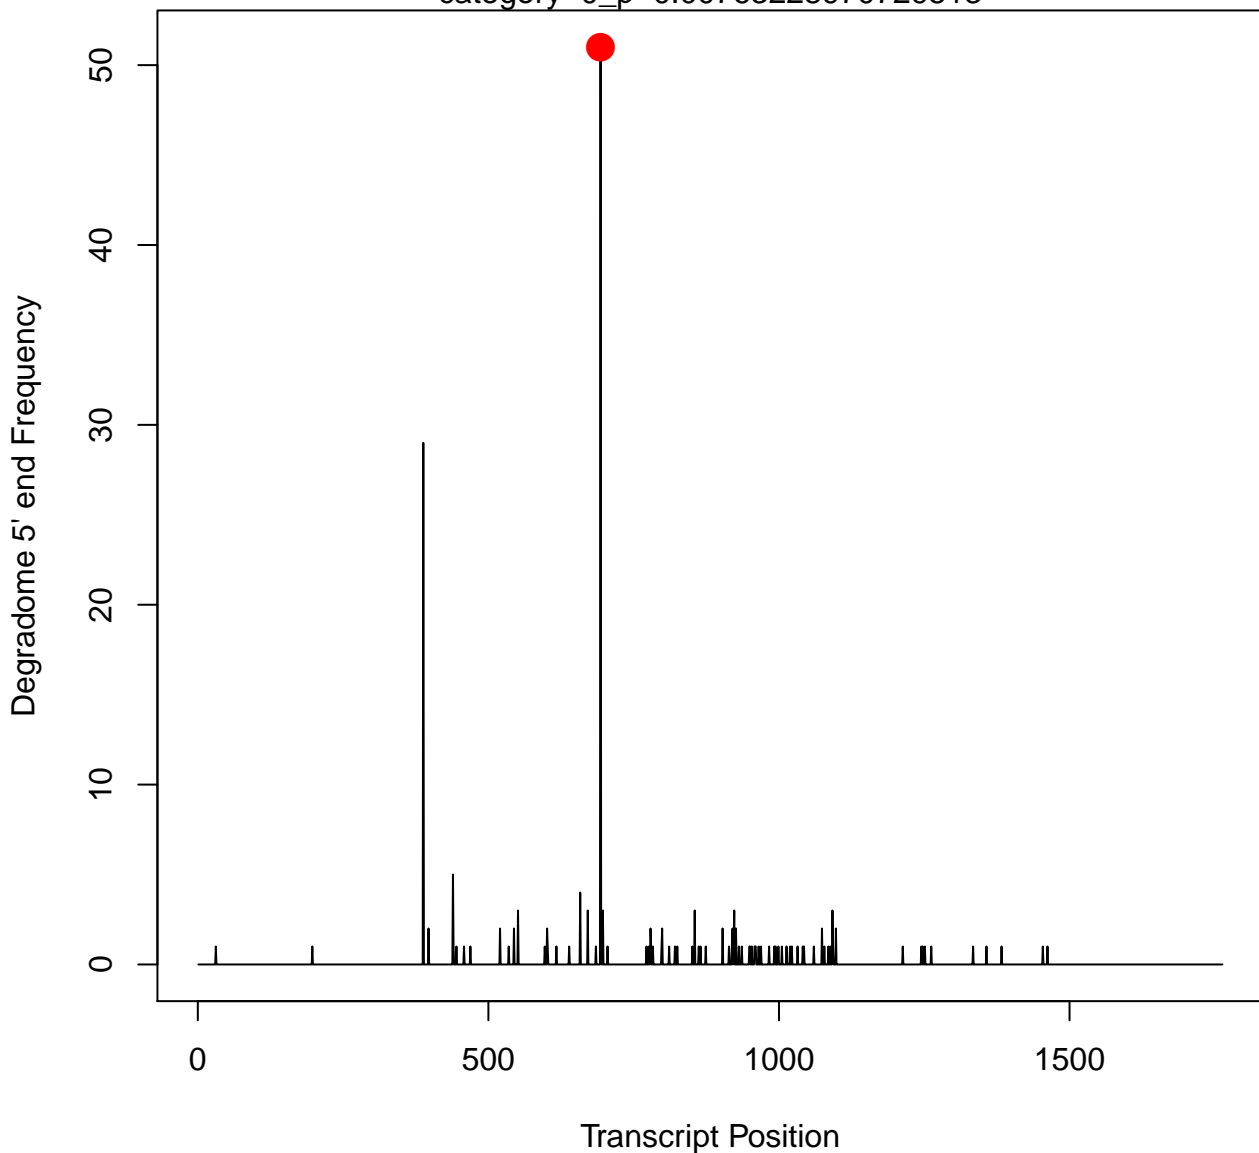

Supplement: s1 [file s1]

**T=Cluster-18410.101496\_Q=novel\_63\_S=170**

category=2\_p=0.0115490438418195

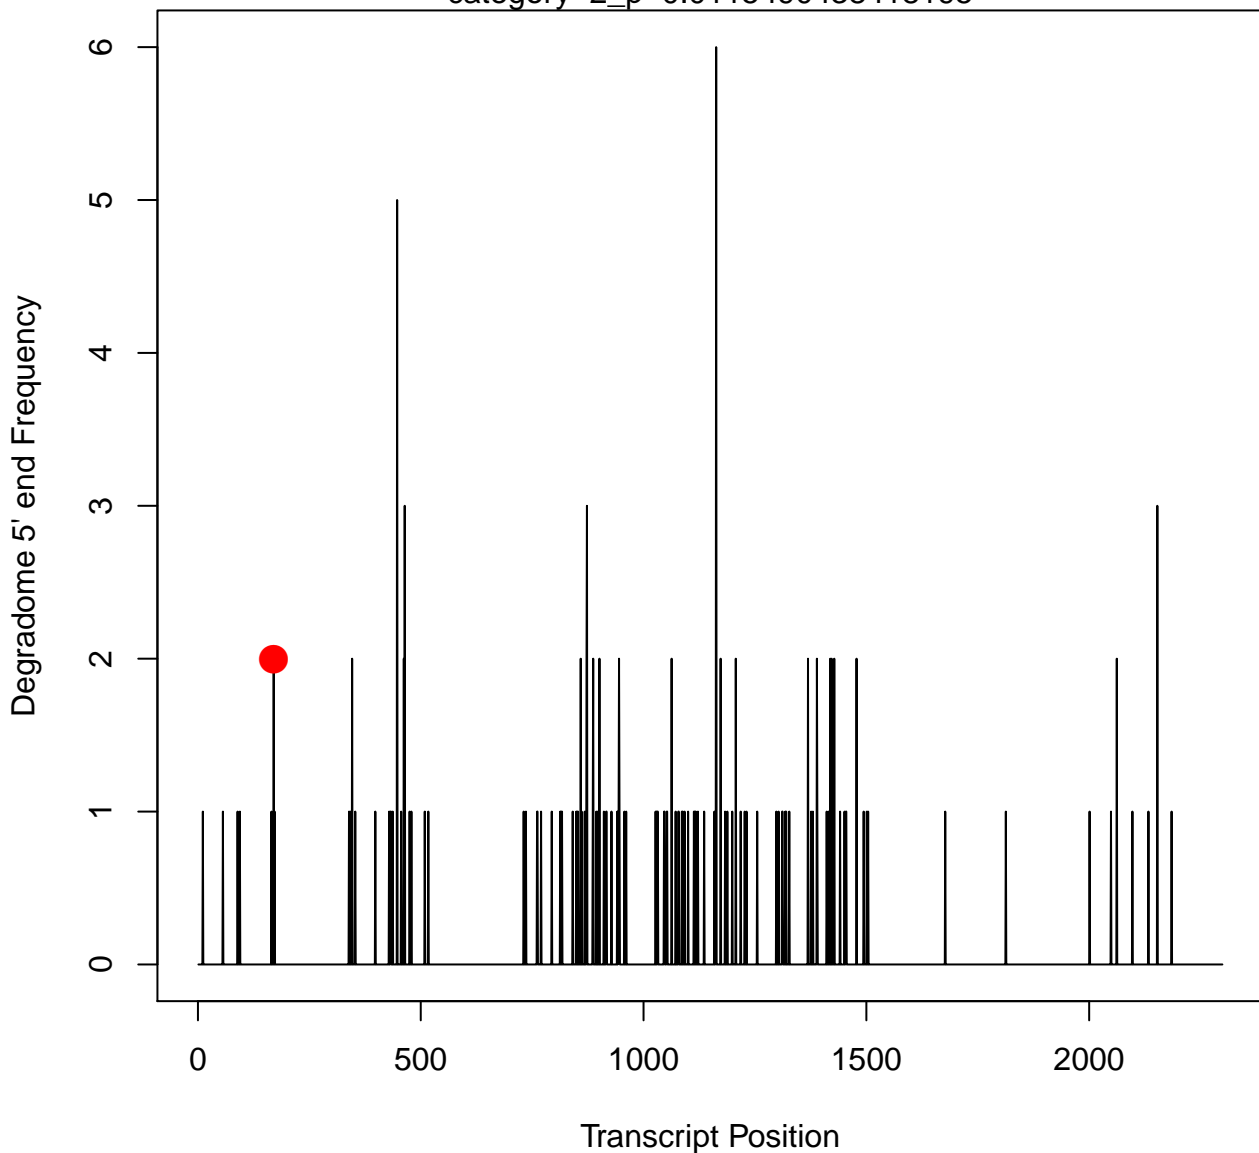

Supplement: s1 [file s1]
