# Supplementary figures and images for: Uncovering miRNA-mRNA Regulatory Modules in Developing Xylem of Pinus massoniana via Small RNA and Degradome Sequencing (part 7 of 9)
Source: MDPI journal article supplement (doi:10.3390/ijms221810154), 2021-09-21

**T=Cluster-18410.68882\_Q=pma-miR946a-3p\_S=87**

category=0\_p=0.0537729390983084

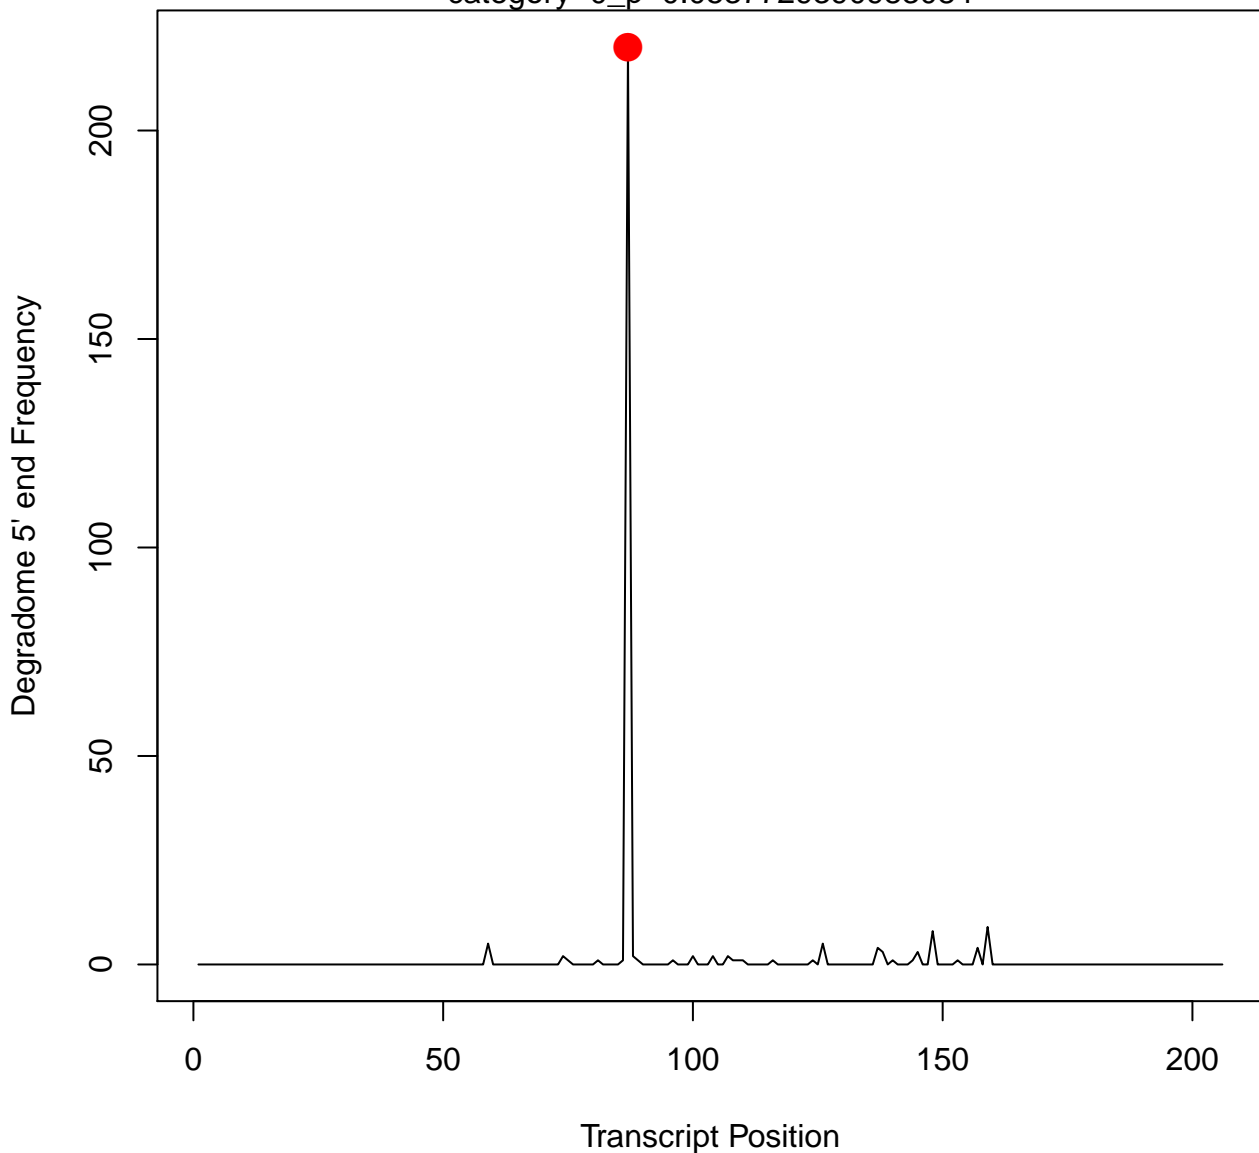

Supplement: s1 [file s1]

**T=Cluster-18410.42404\_Q=novel\_174\_S=296**

category=1\_p=0.0753140389239767

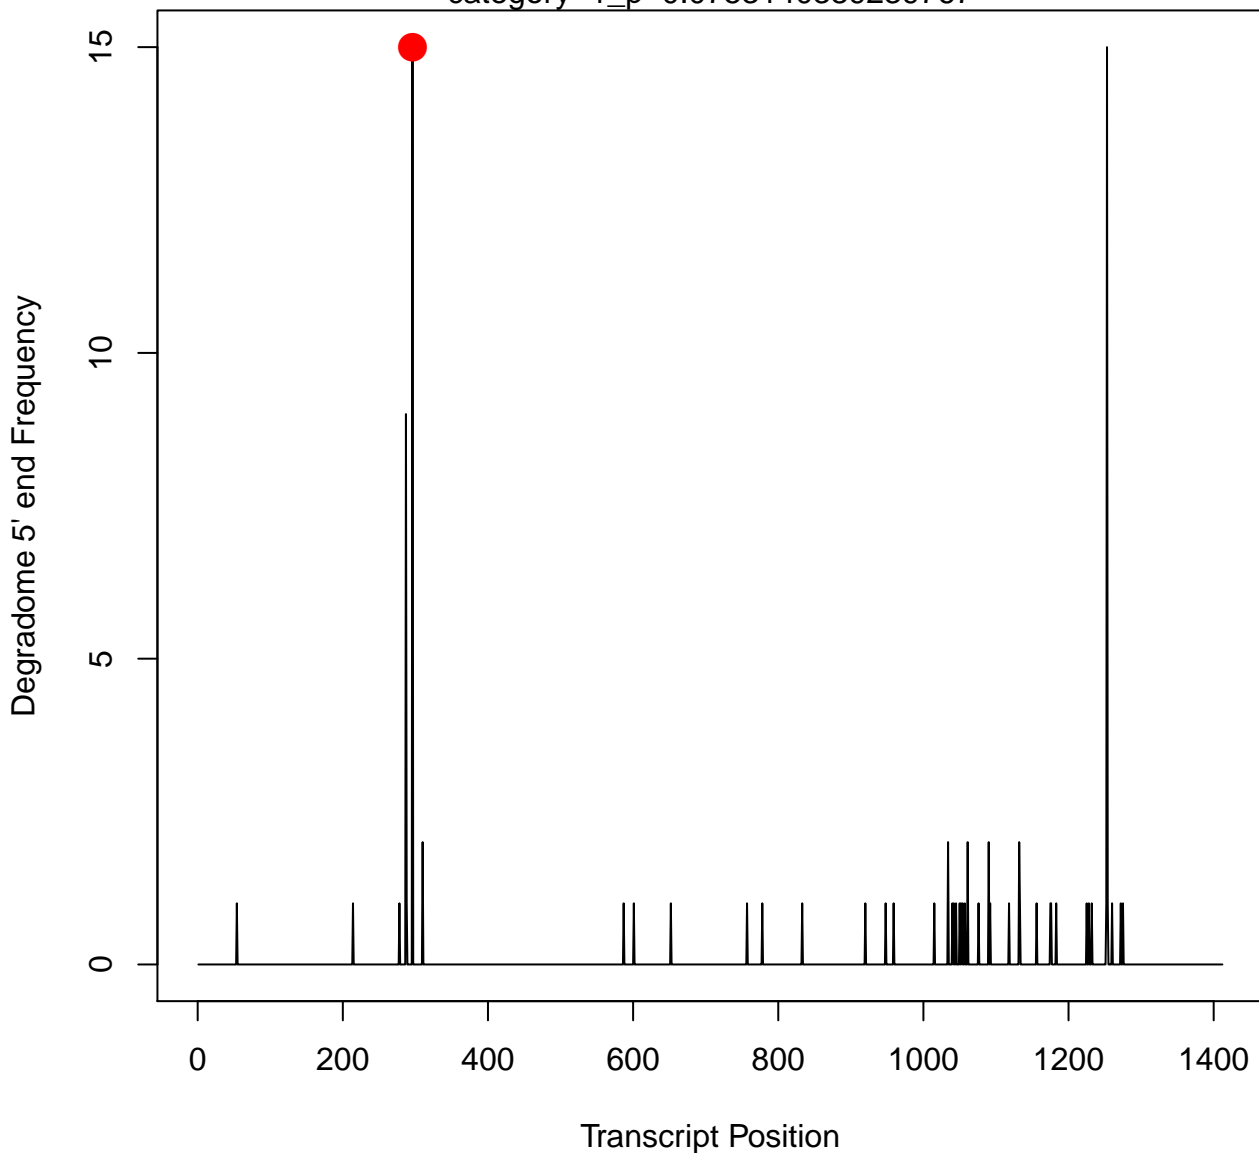

Supplement: s1 [file s1]

**T=Cluster-18410.110501\_Q=novel\_1\_S=418**

category=1\_p=0.0941578673898755

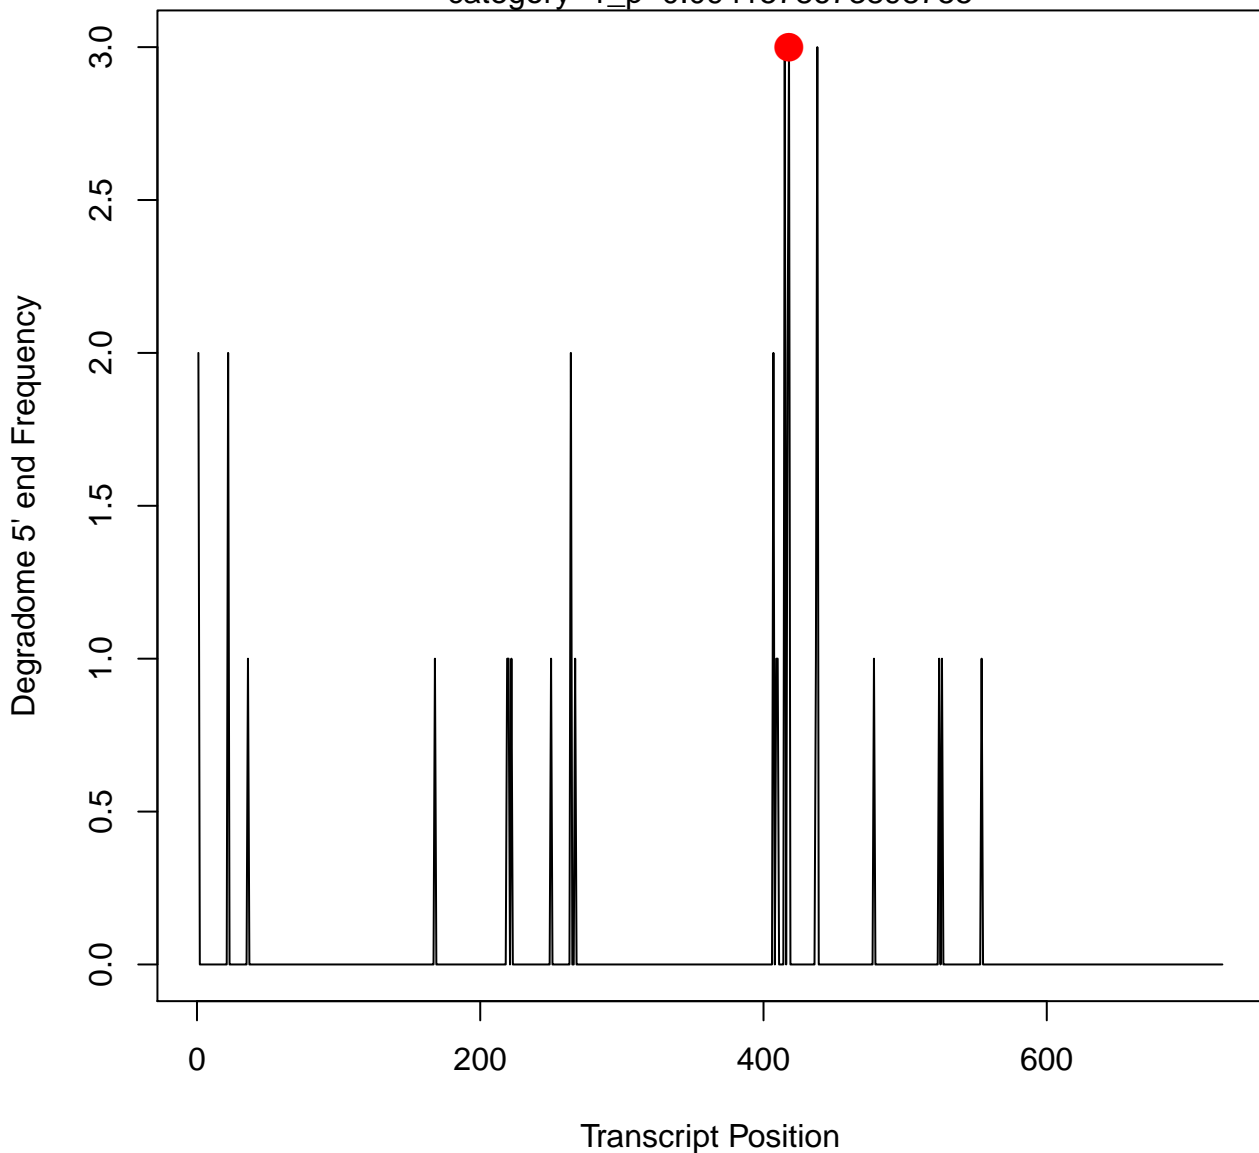

Supplement: s1 [file s1]

**T=Cluster-18410.114635\_Q=novel\_82\_S=496**

category=1\_p=0.0313186552710877

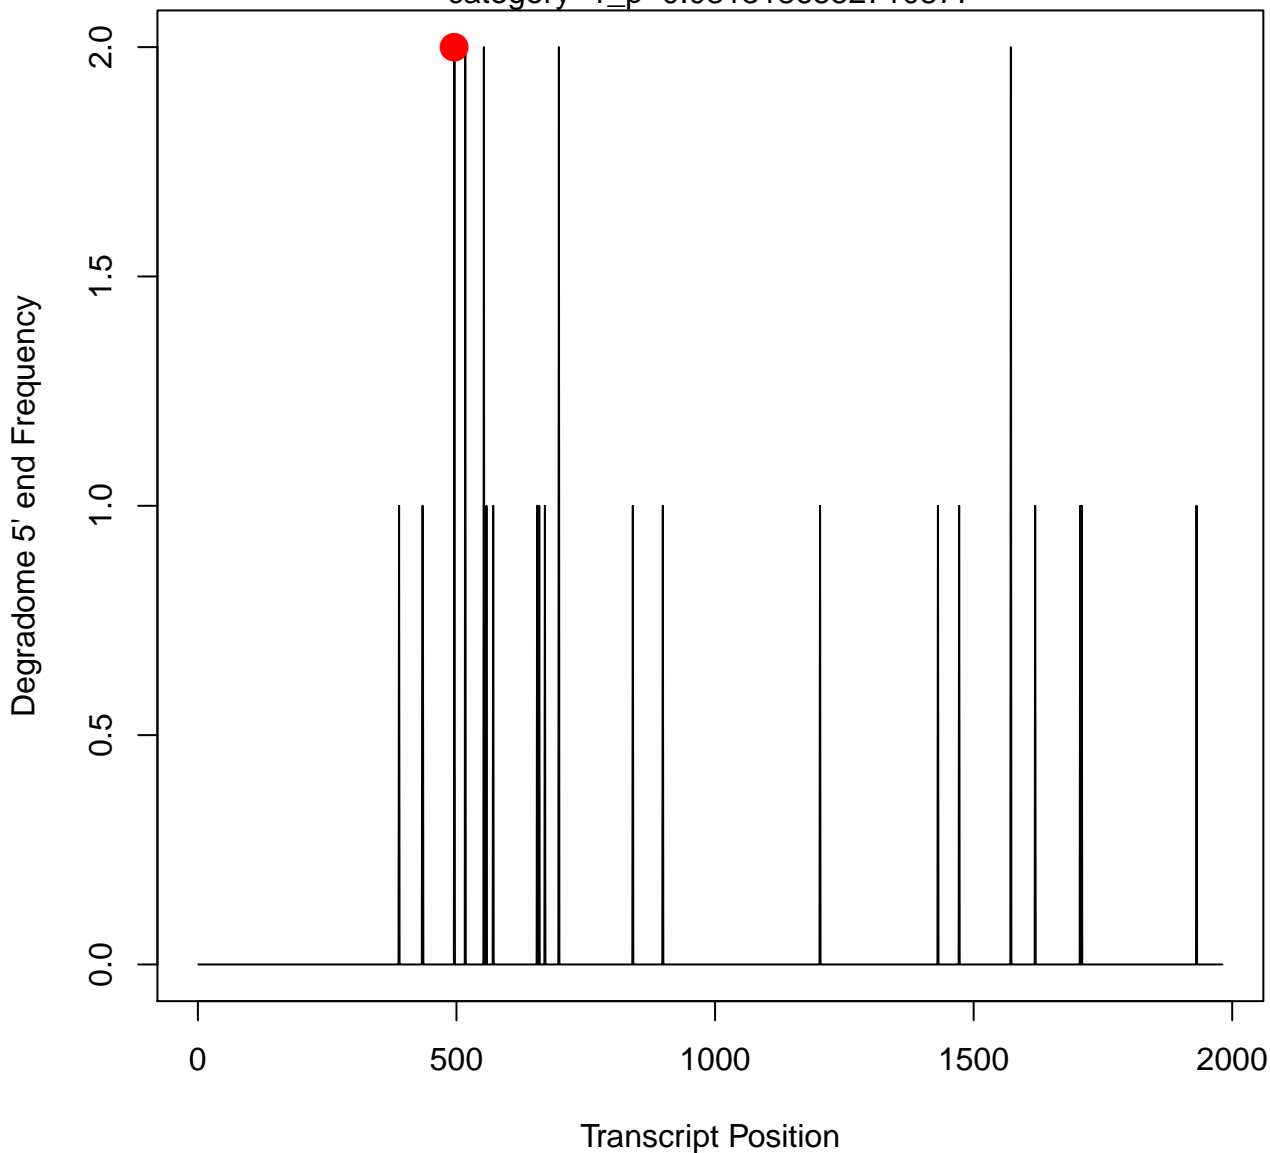

Supplement: s1 [file s1]

**T=Cluster-18410.60885\_Q=novel\_183\_S=280**

category=0\_p=0.000820545098840553

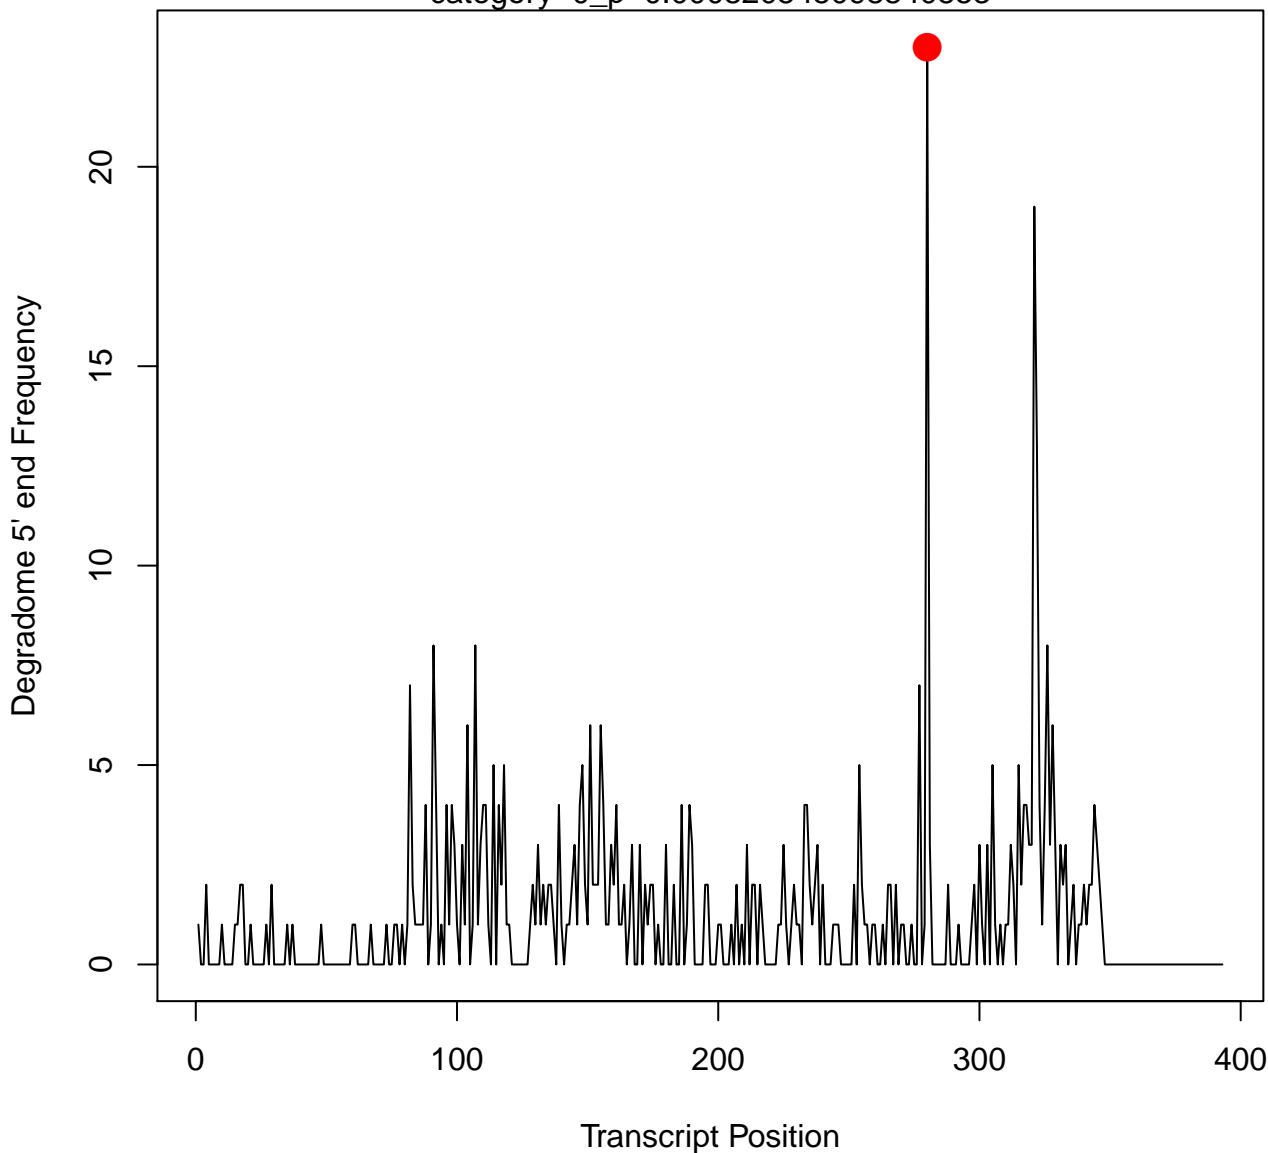

Supplement: s1 [file s1]

**T=Cluster-18410.49646\_Q=novel\_92\_S=1892**

category=0\_p=0.00273253291772324

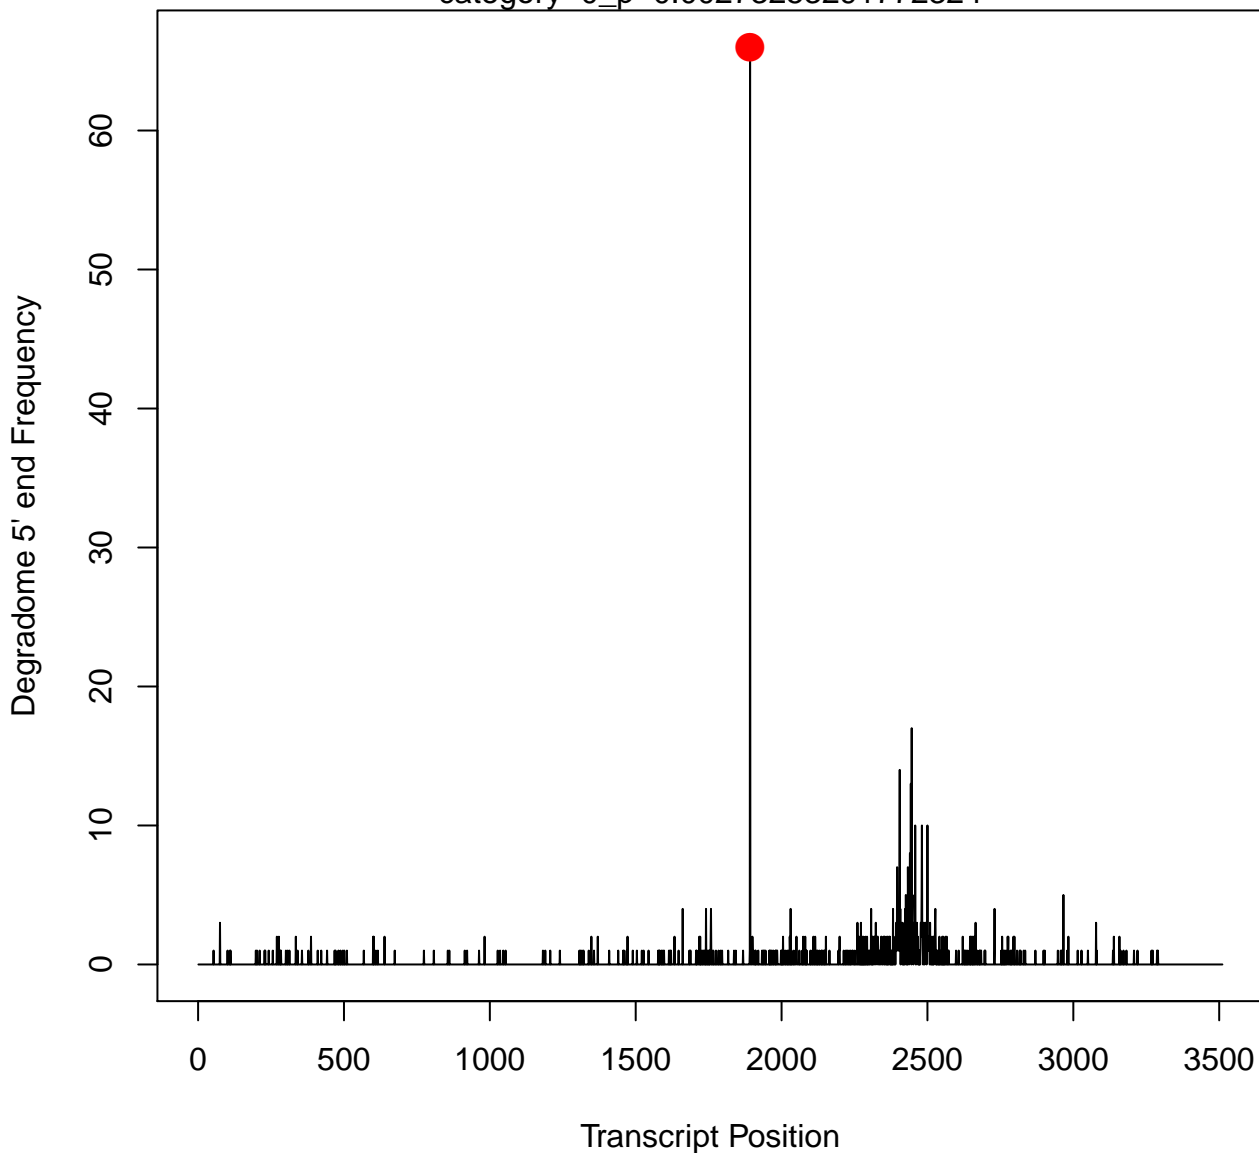

Supplement: s1 [file s1]

**T=Cluster-18410.20019\_Q=novel\_109\_S=2297**

category=0\_p=0.0653526116570134

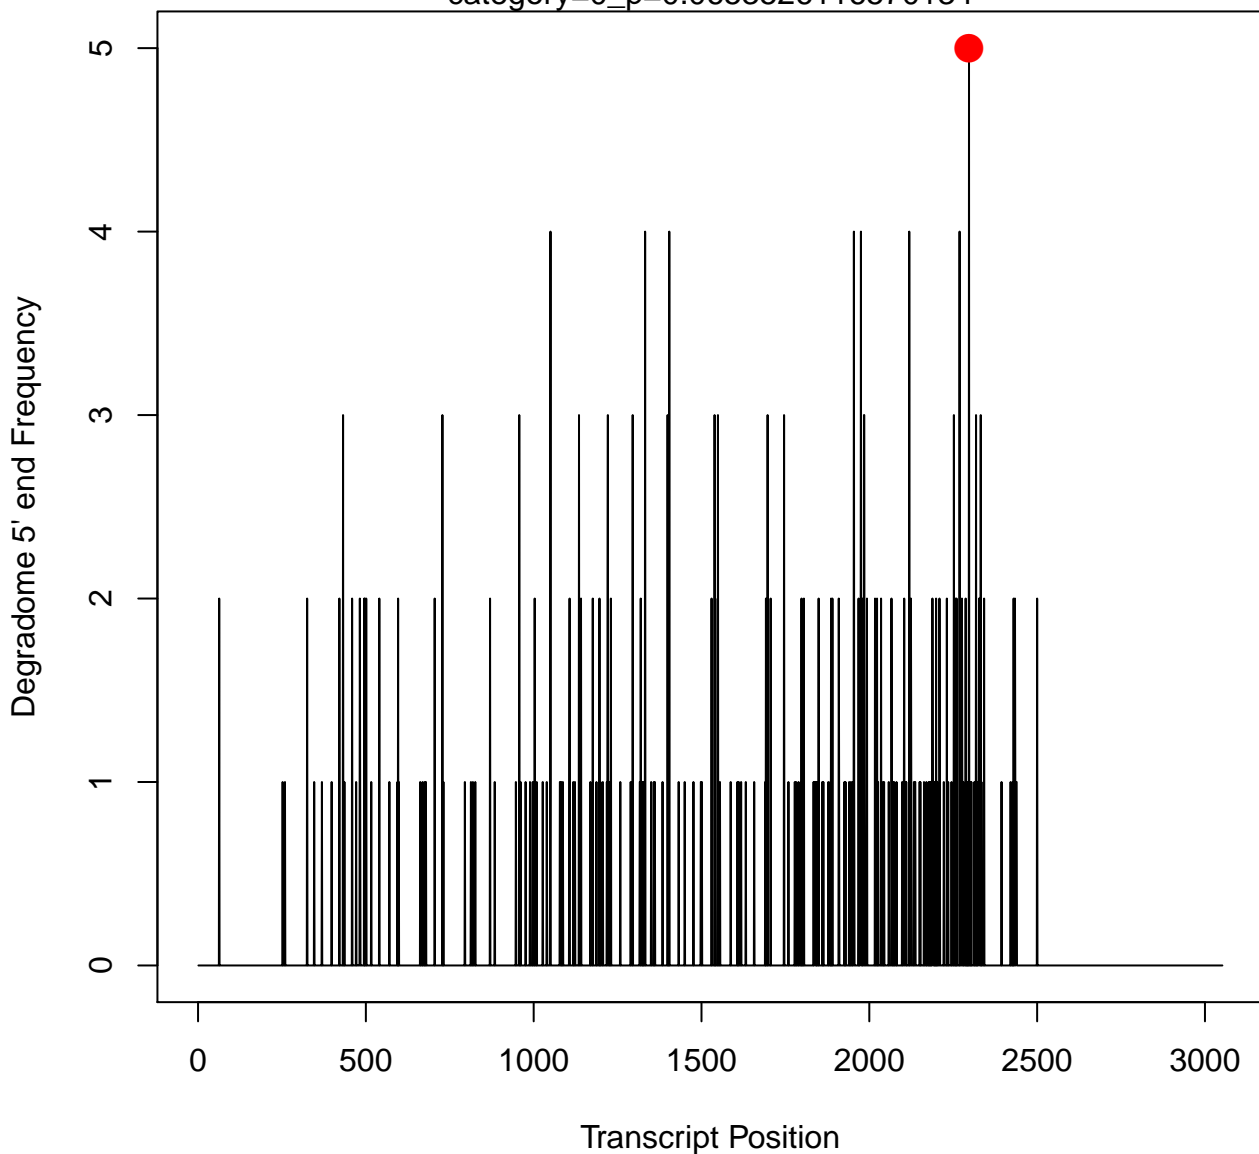

Supplement: s1 [file s1]

**T=Cluster-18410.110133\_Q=novel\_168\_S=582**

category=1\_p=0.024343371496319

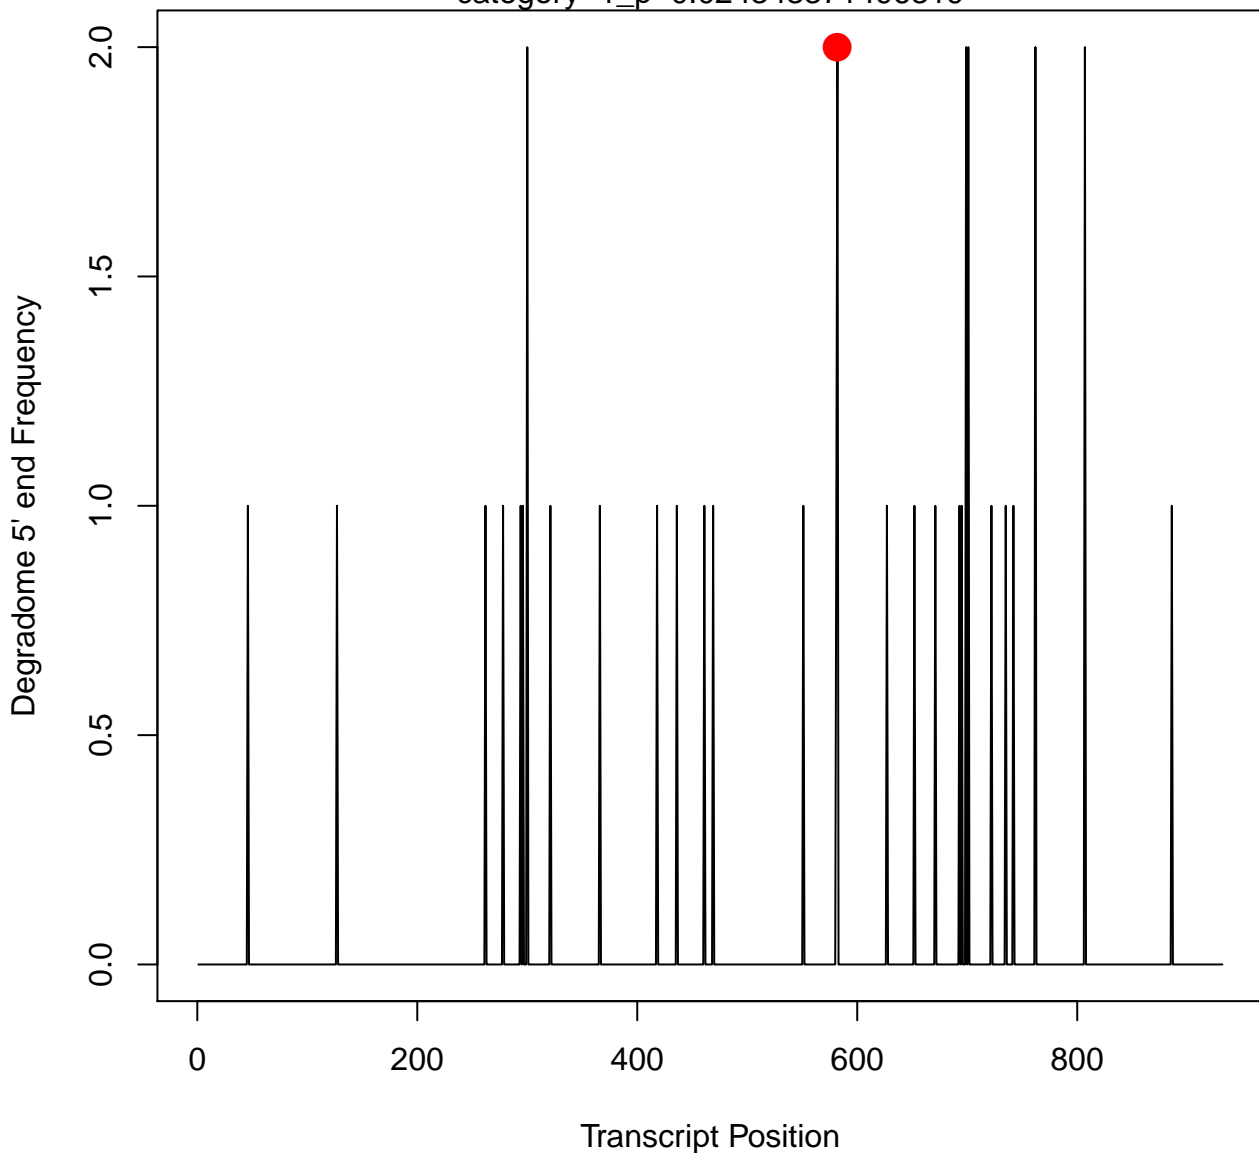

Supplement: s1 [file s1]

**T=Cluster-17513.1\_Q=pma-miR946a-3p\_S=399**

category=0\_p=0.00600171812373296

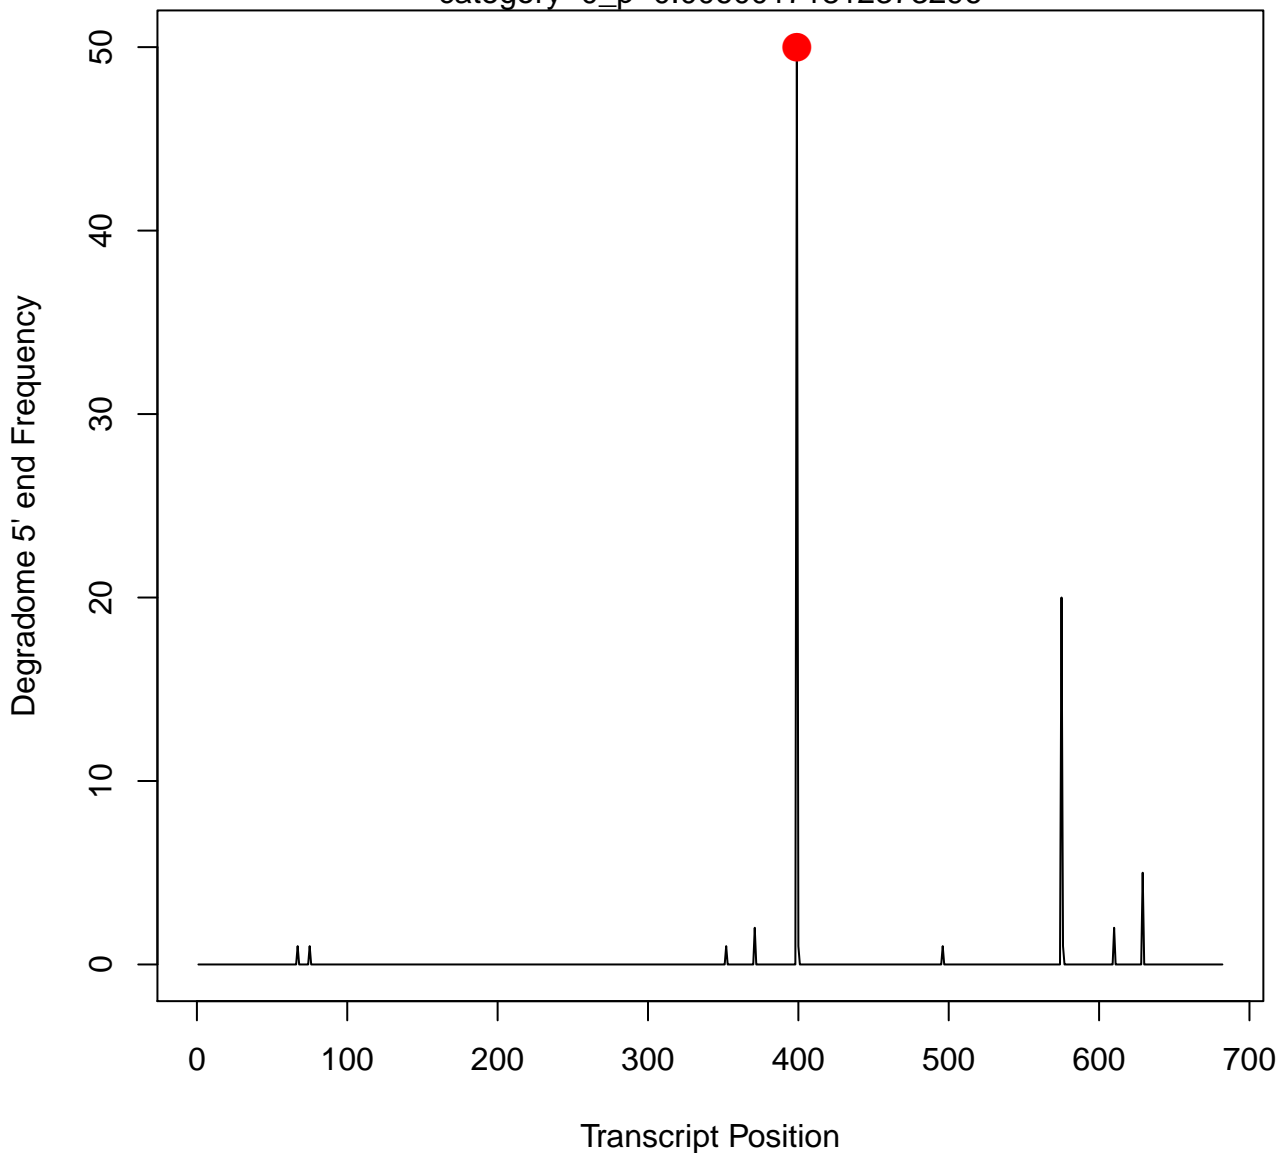

Supplement: s1 [file s1]

**T=Cluster-18410.44544\_Q=novel\_117\_S=132**

category=2\_p=0.0454020367599618

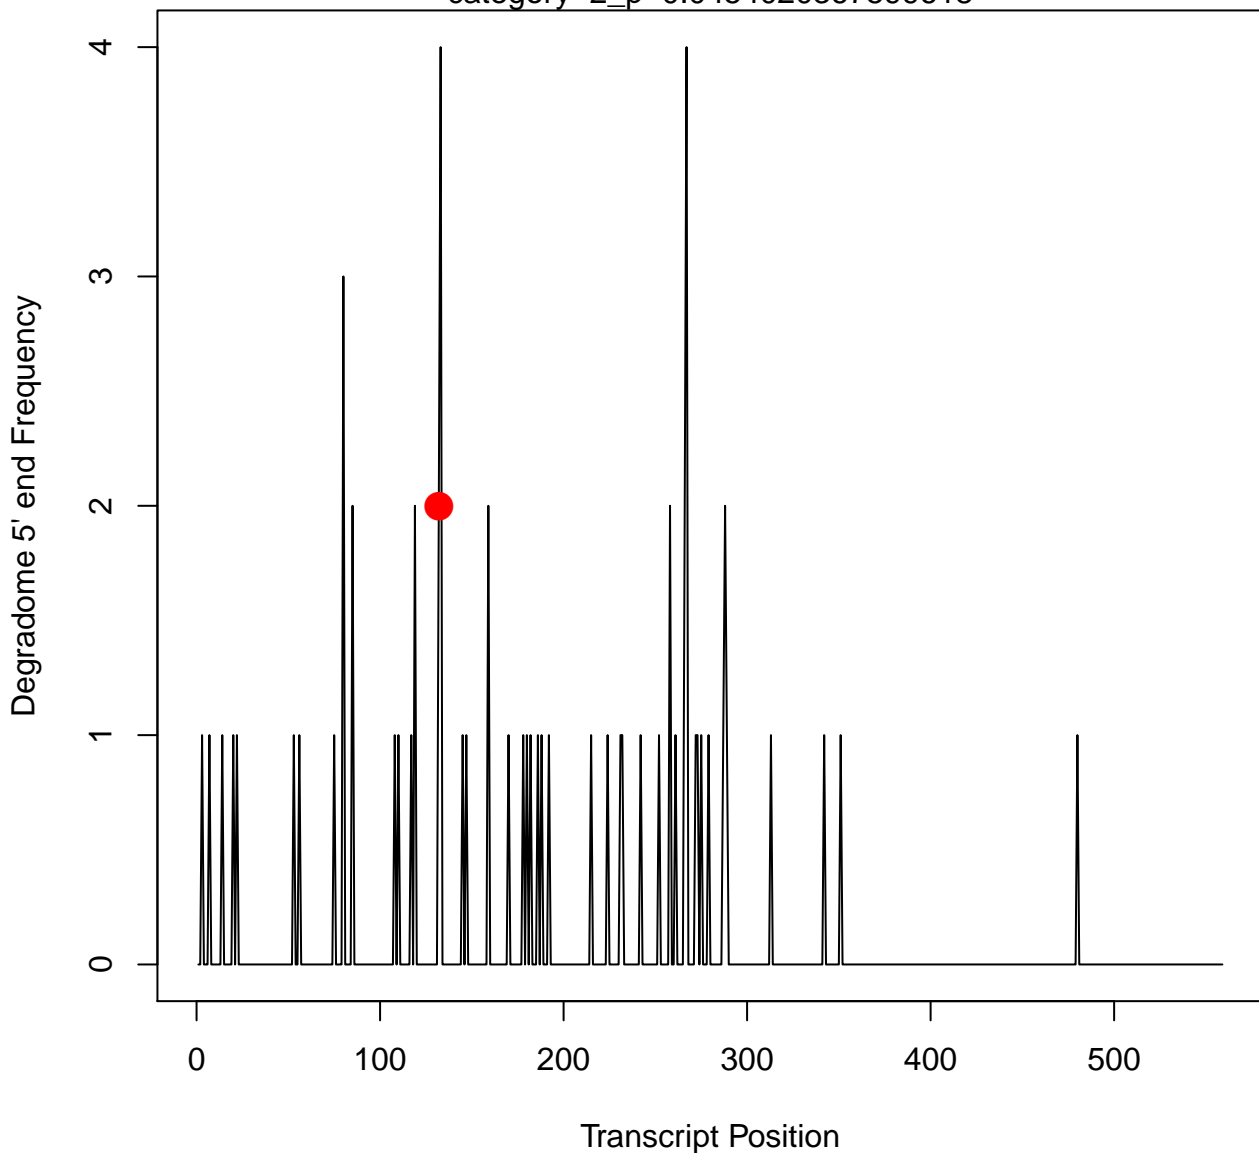

Supplement: s1 [file s1]

**T=Cluster-18410.100049\_Q=novel\_159\_S=377**

category=0\_p=0.00382345425486719

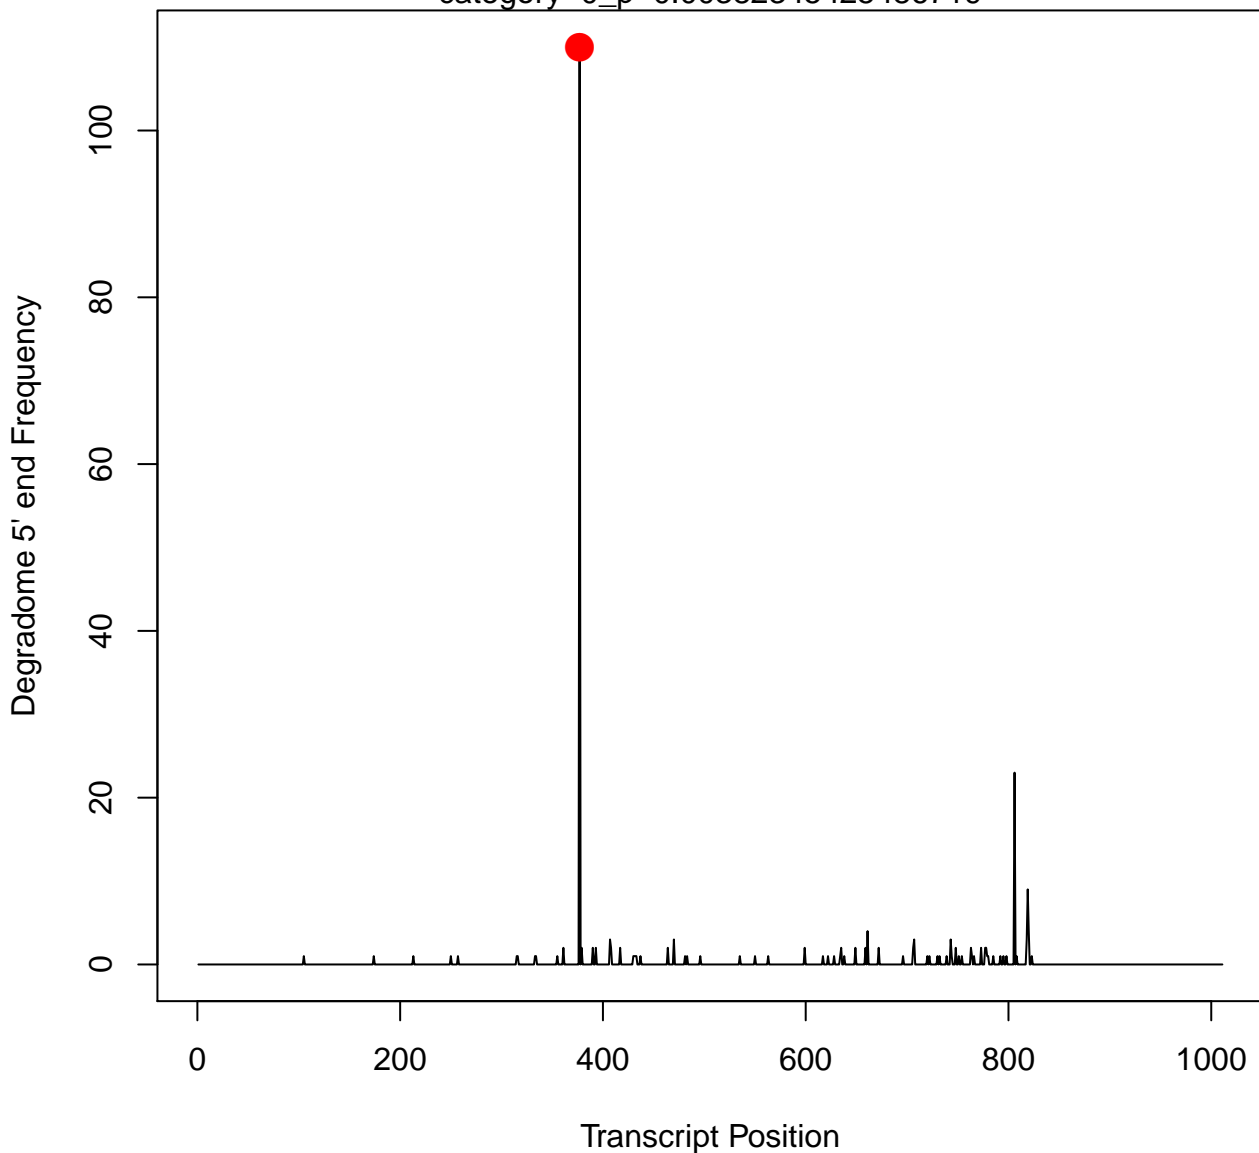

Supplement: s1 [file s1]

**T=Cluster-18410.60799\_Q=novel\_148\_S=21**

category=0\_p=0.0040959980740275

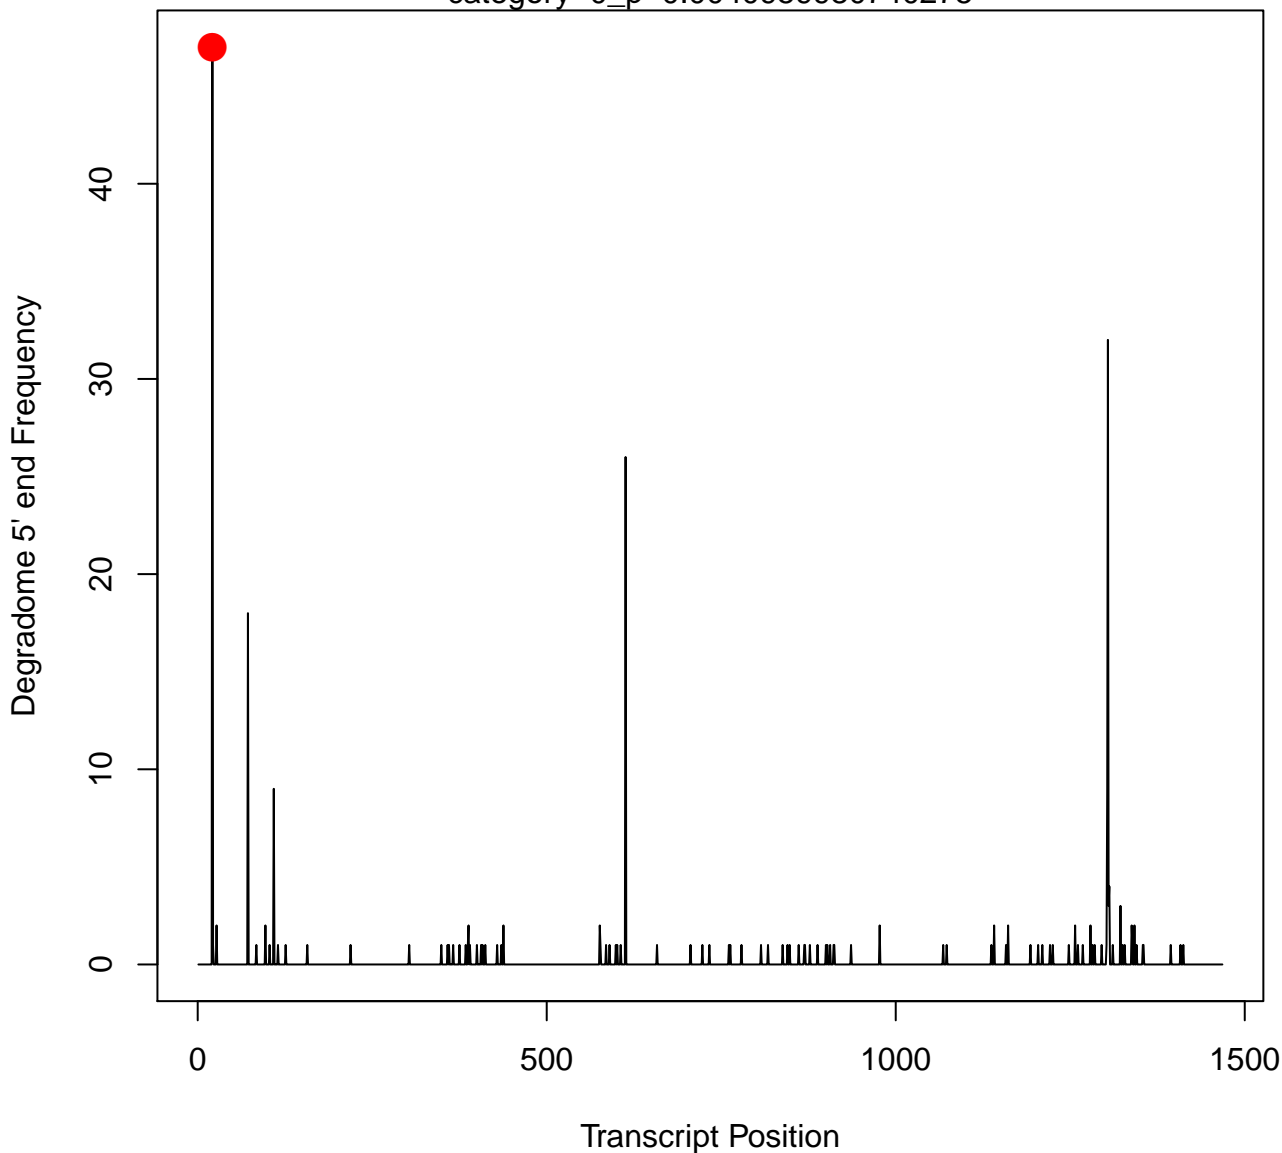

Supplement: s1 [file s1]

**T=Cluster-9536.0\_Q=novel\_25\_S=29**

category=1\_p=0.00280367153807071

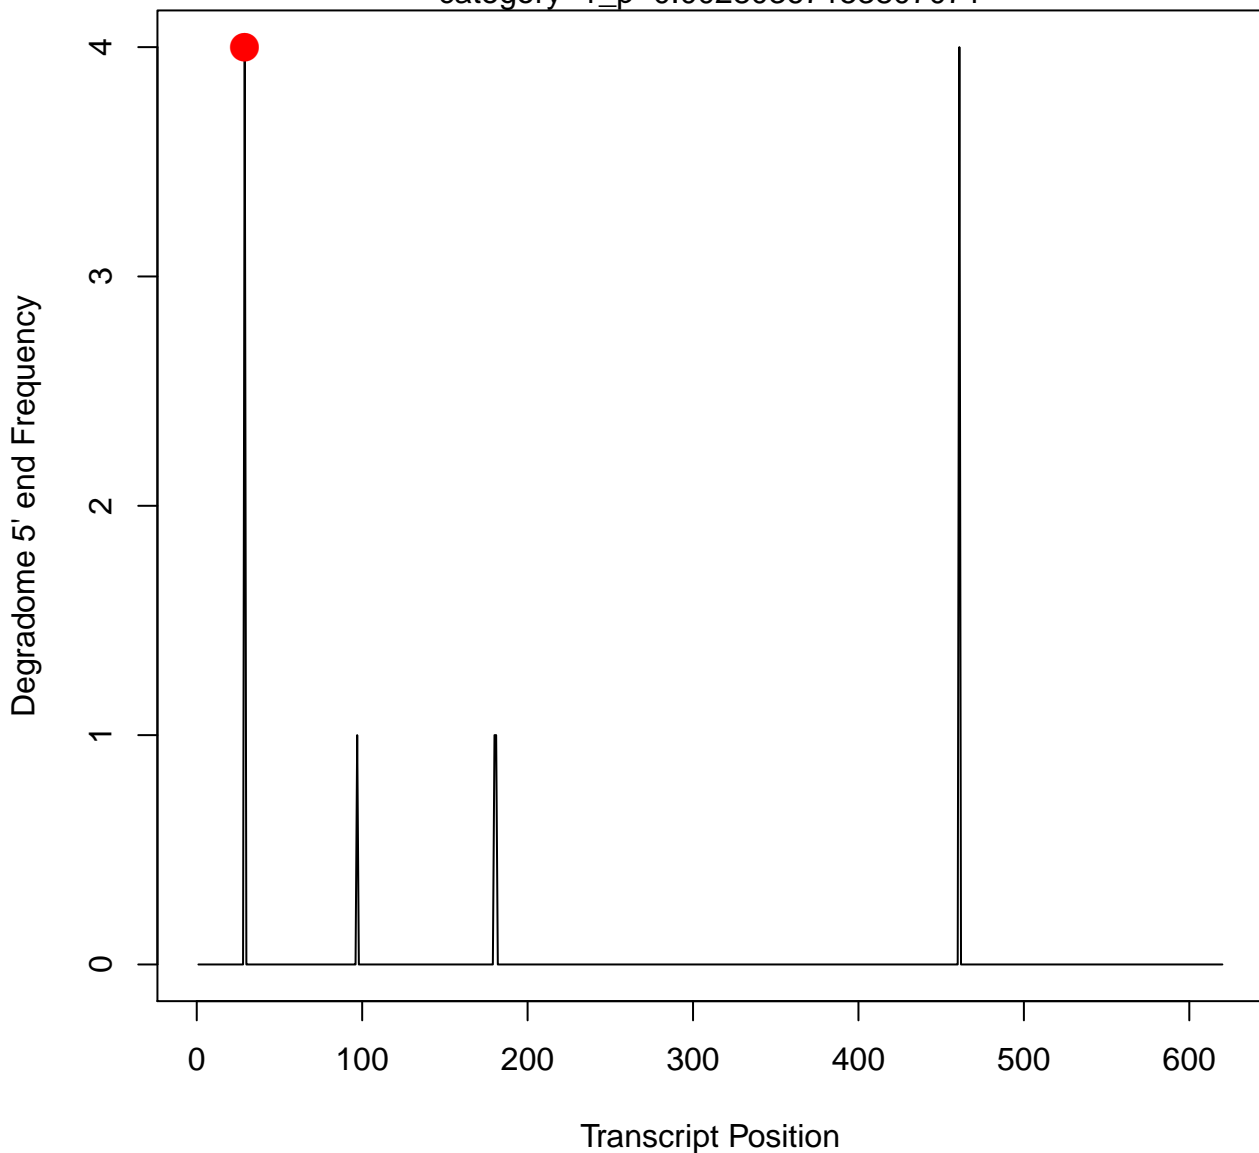

Supplement: s1 [file s1]

**T=Cluster-18410.20073\_Q=novel\_47\_S=164**

category=0\_p=0.0100731331718849

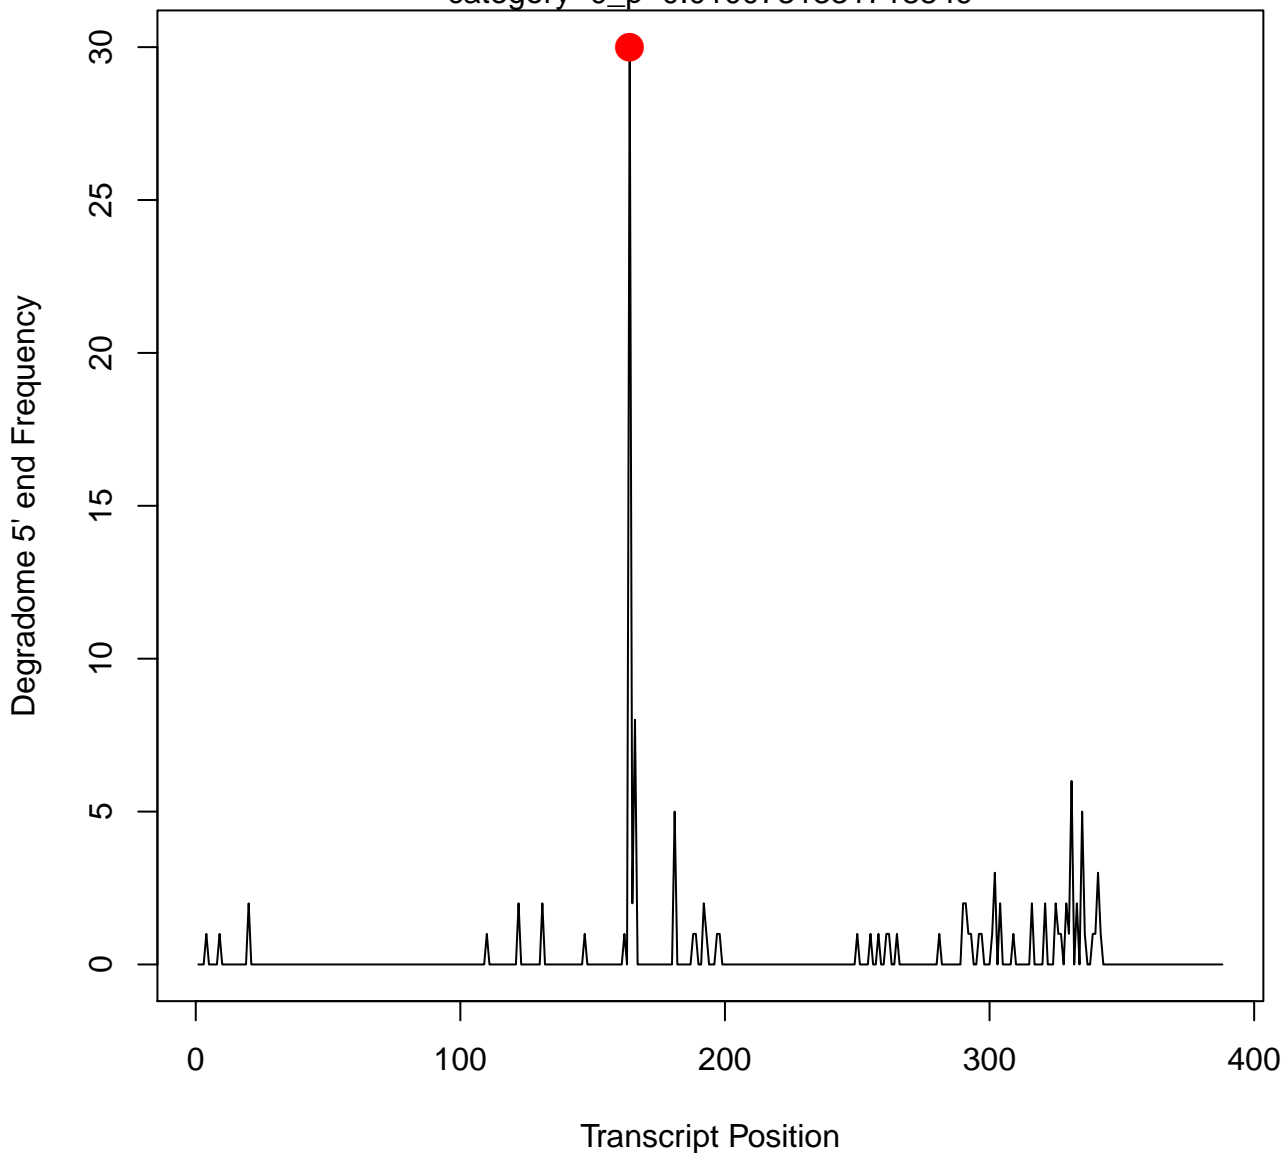

Supplement: s1 [file s1]

**T=Cluster-18410.15788\_Q=novel\_12\_S=809**

category=0\_p=0.0299160175807553

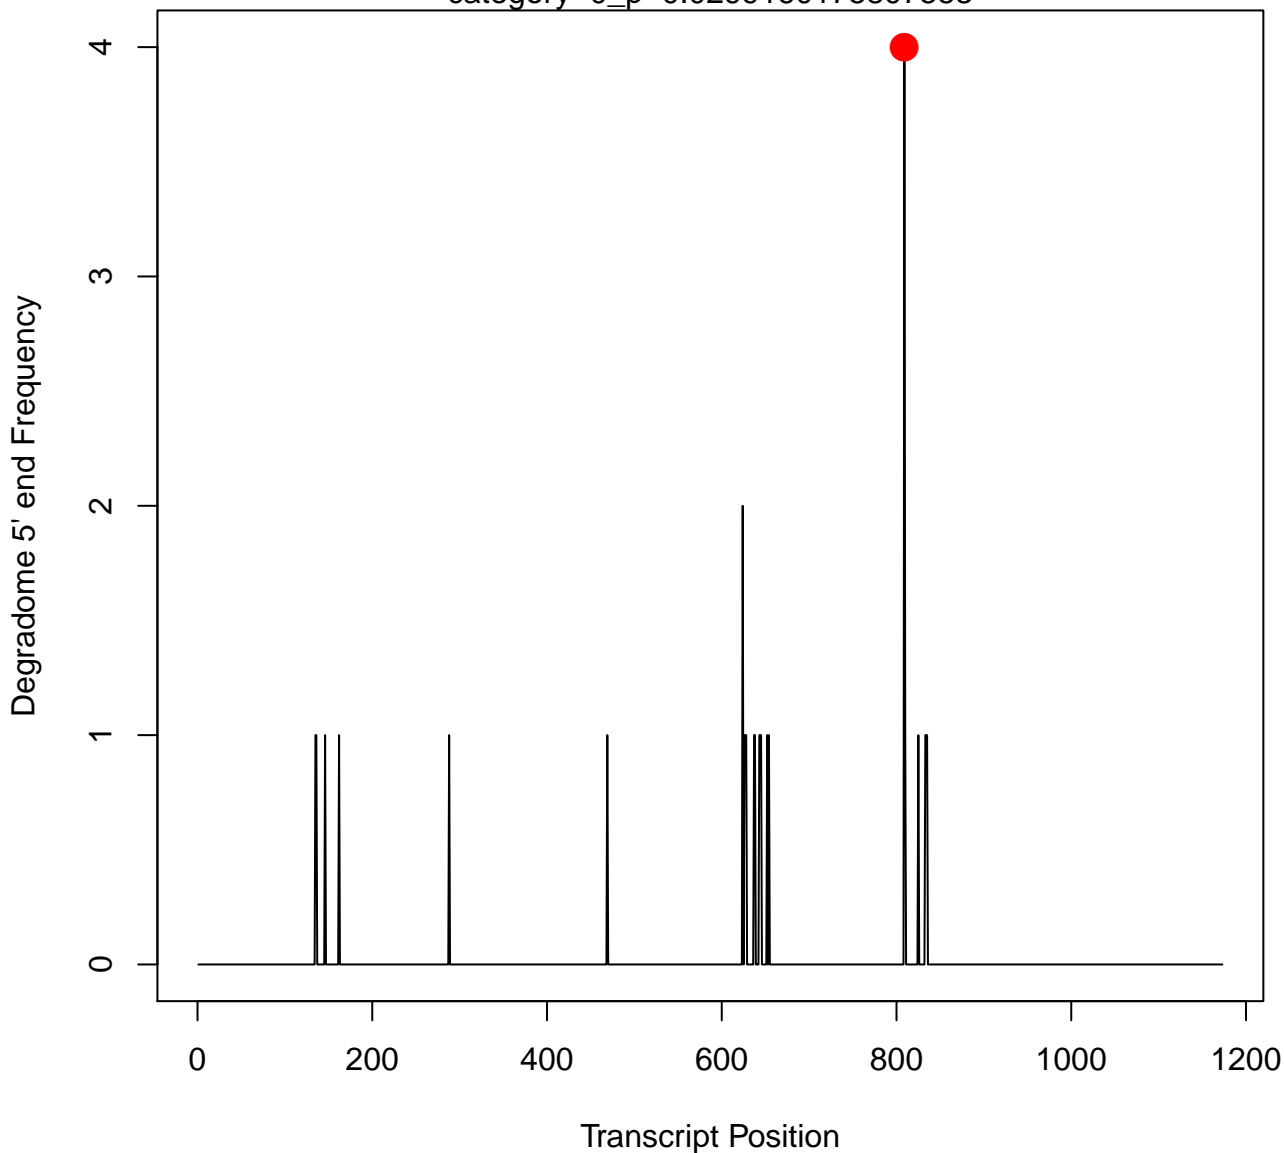

Supplement: s1 [file s1]

**T=Cluster-18410.54175\_Q=novel\_104\_S=683**

category=2\_p=0.0780956144108357

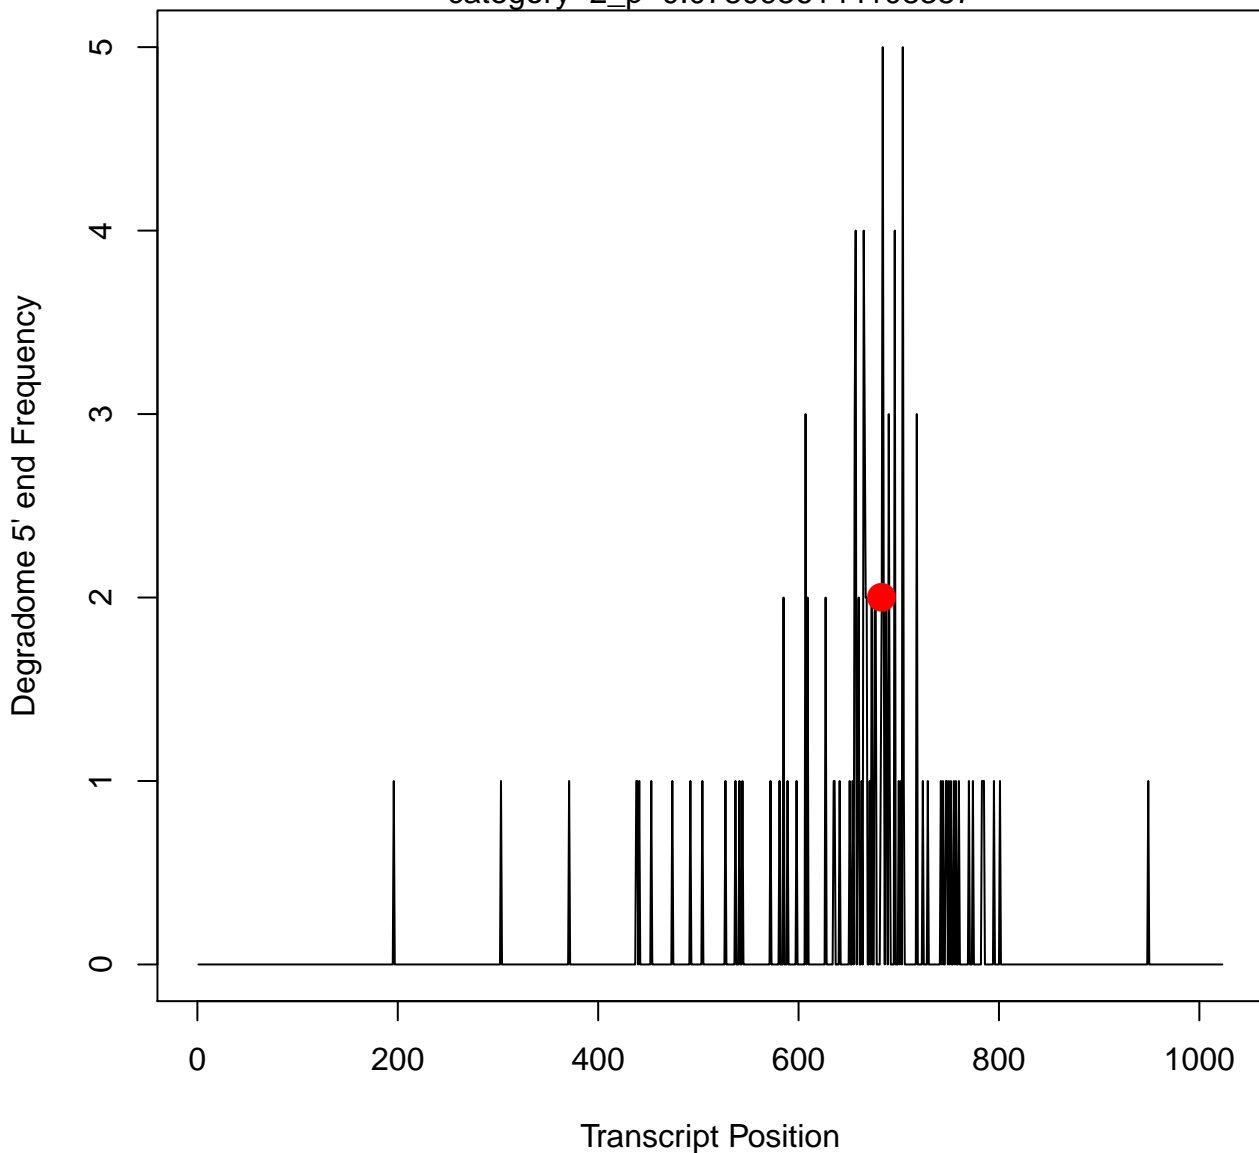

Supplement: s1 [file s1]

**T=Cluster-18410.78671\_Q=novel\_172\_S=612**

category=2\_p=0.0887427285779705

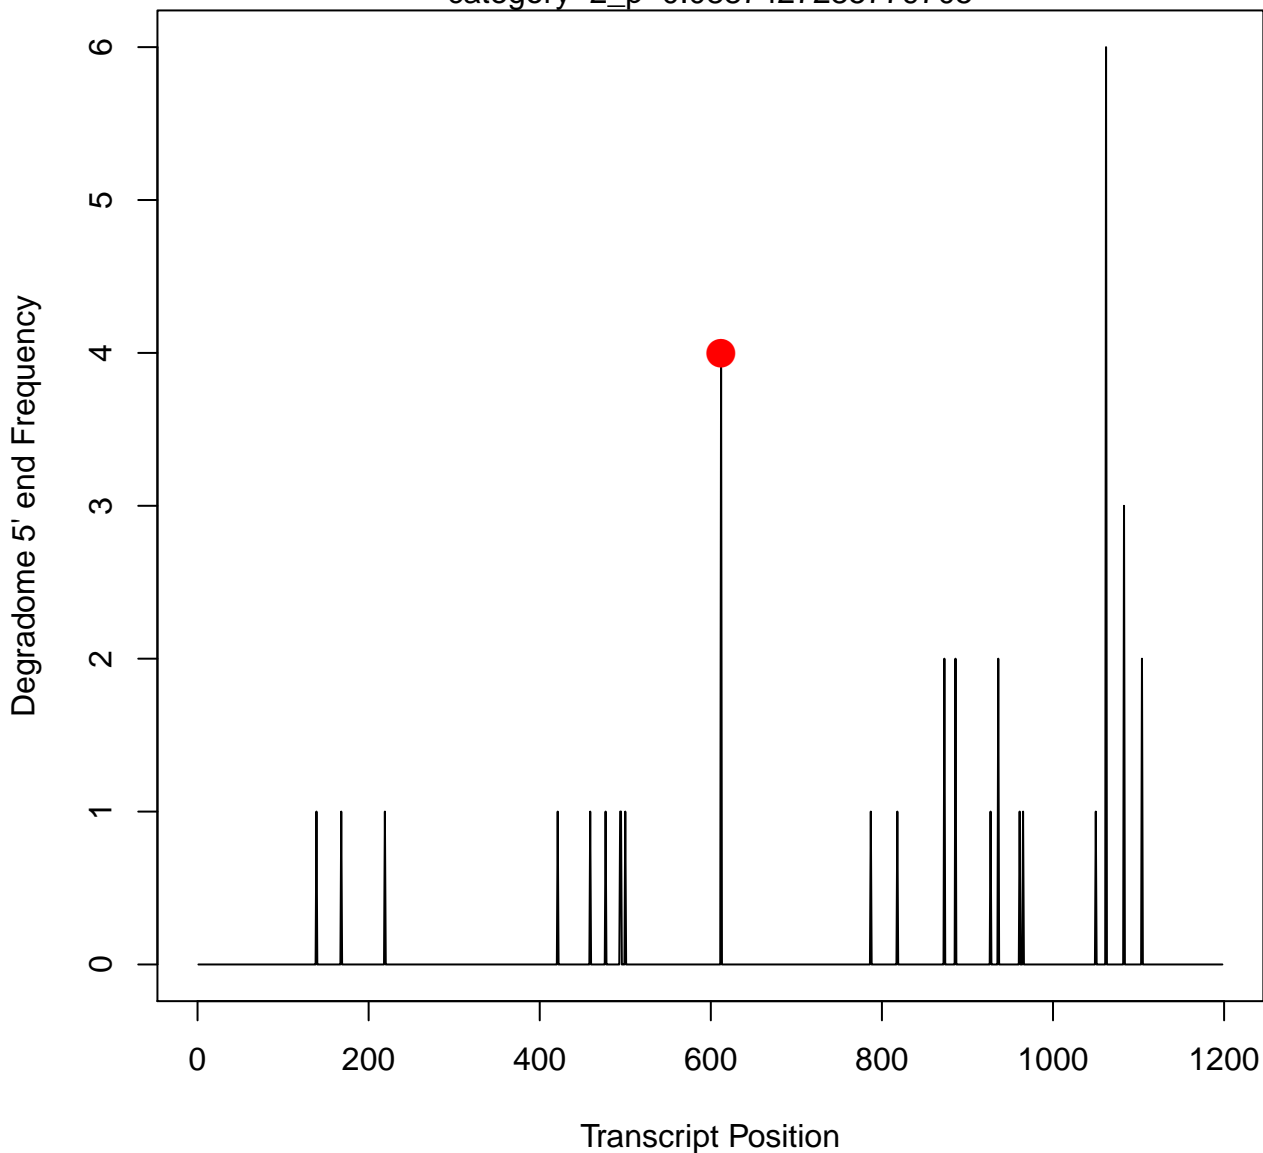

Supplement: s1 [file s1]

**T=Cluster-18410.101747\_Q=novel\_11\_S=826**

category=4\_p=0.024452609380235

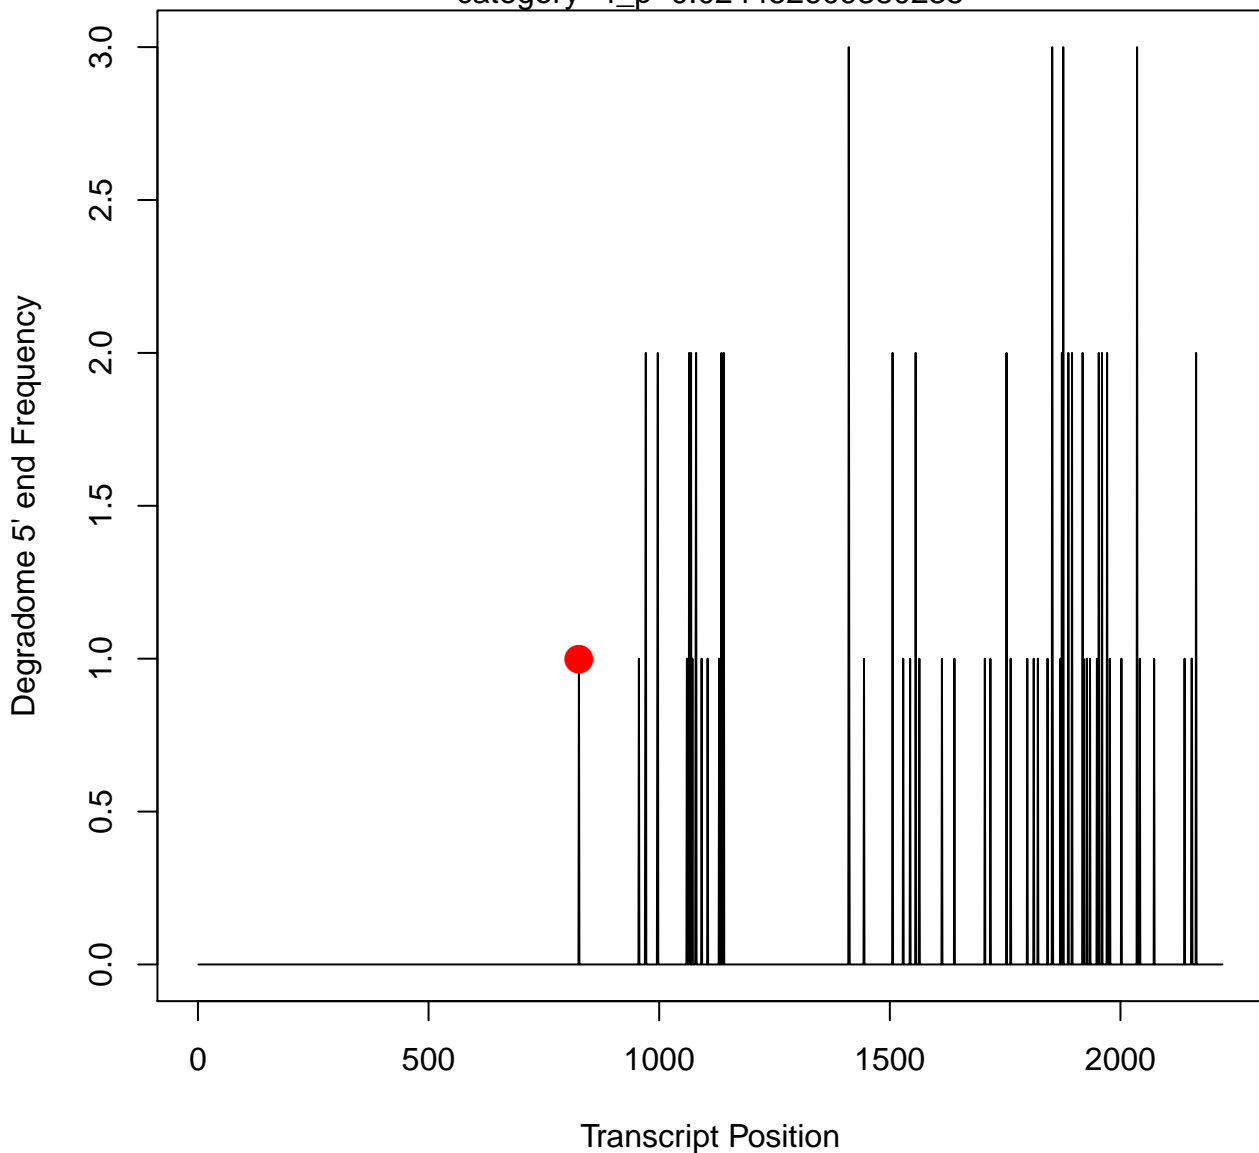

Supplement: s1 [file s1]

**T=Cluster-18410.92935\_Q=novel\_54\_S=675**

category=0\_p=0.00109391048354923

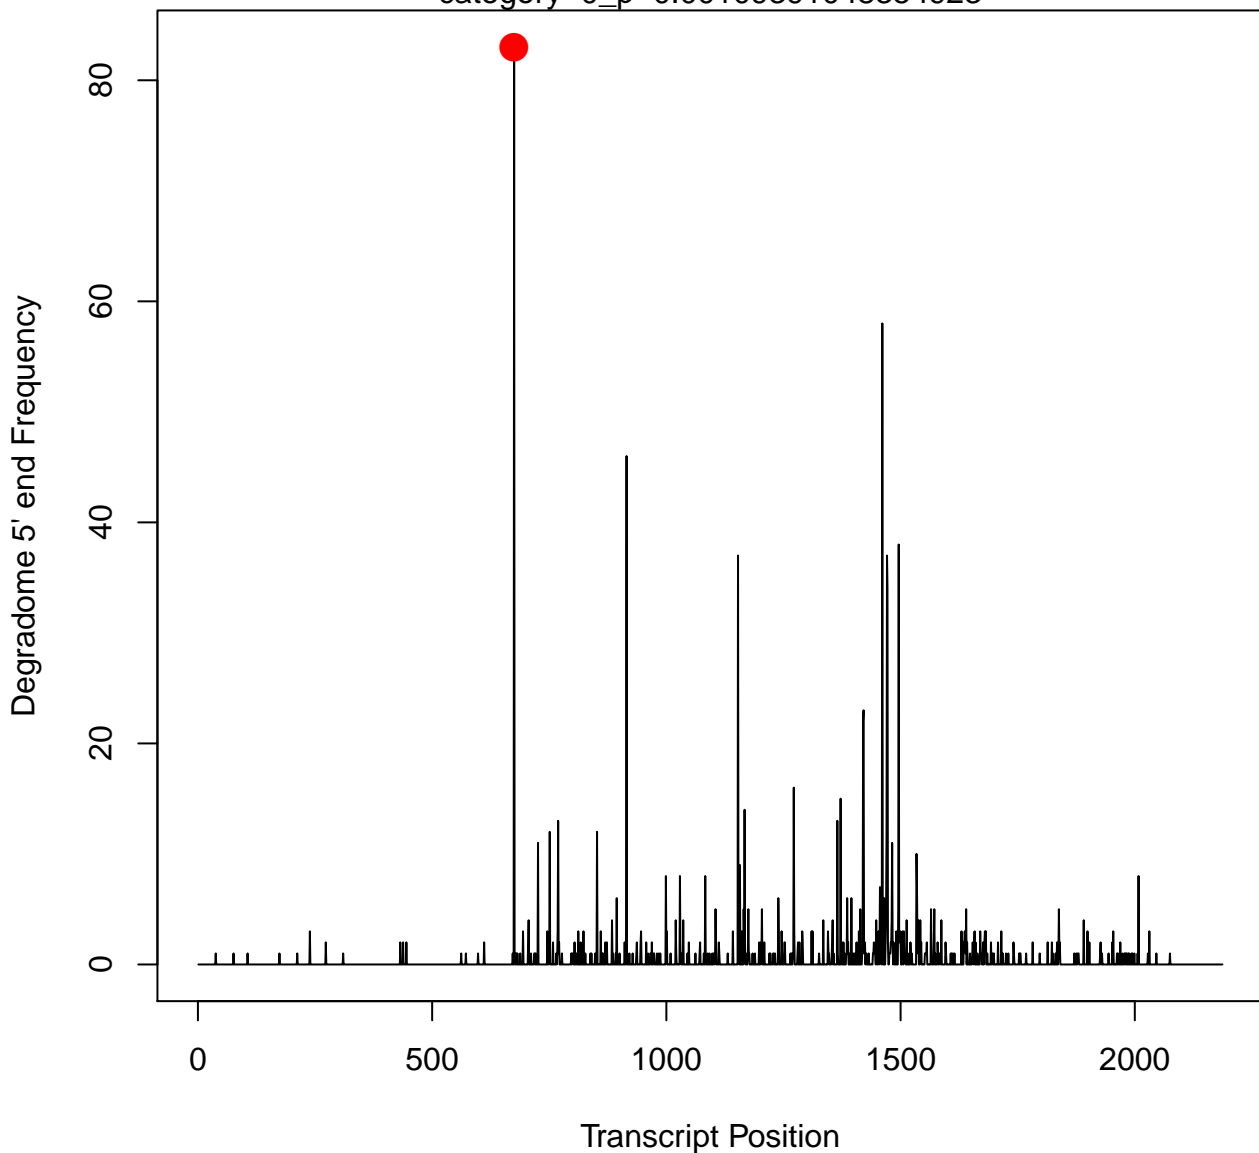

Supplement: s1 [file s1]

**T=Cluster-22924.0\_Q=novel\_42\_S=723**

category=0\_p=0.0154757571486588

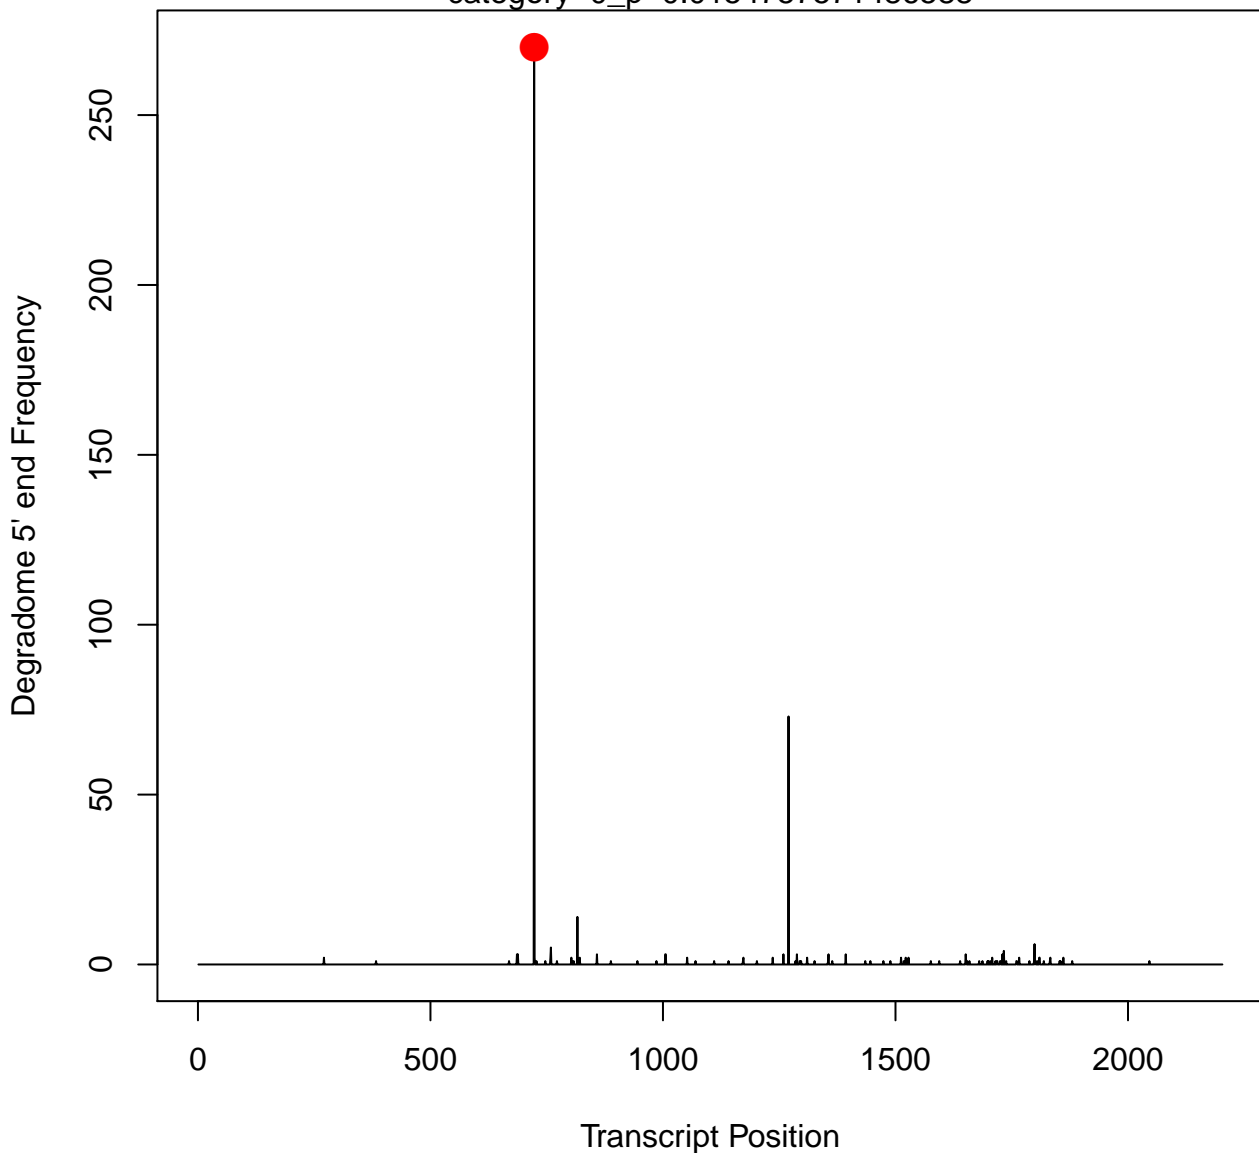

Supplement: s1 [file s1]

**T=Cluster-18410.31890\_Q=novel\_42\_S=268**

category=0\_p=0.00491318222172366

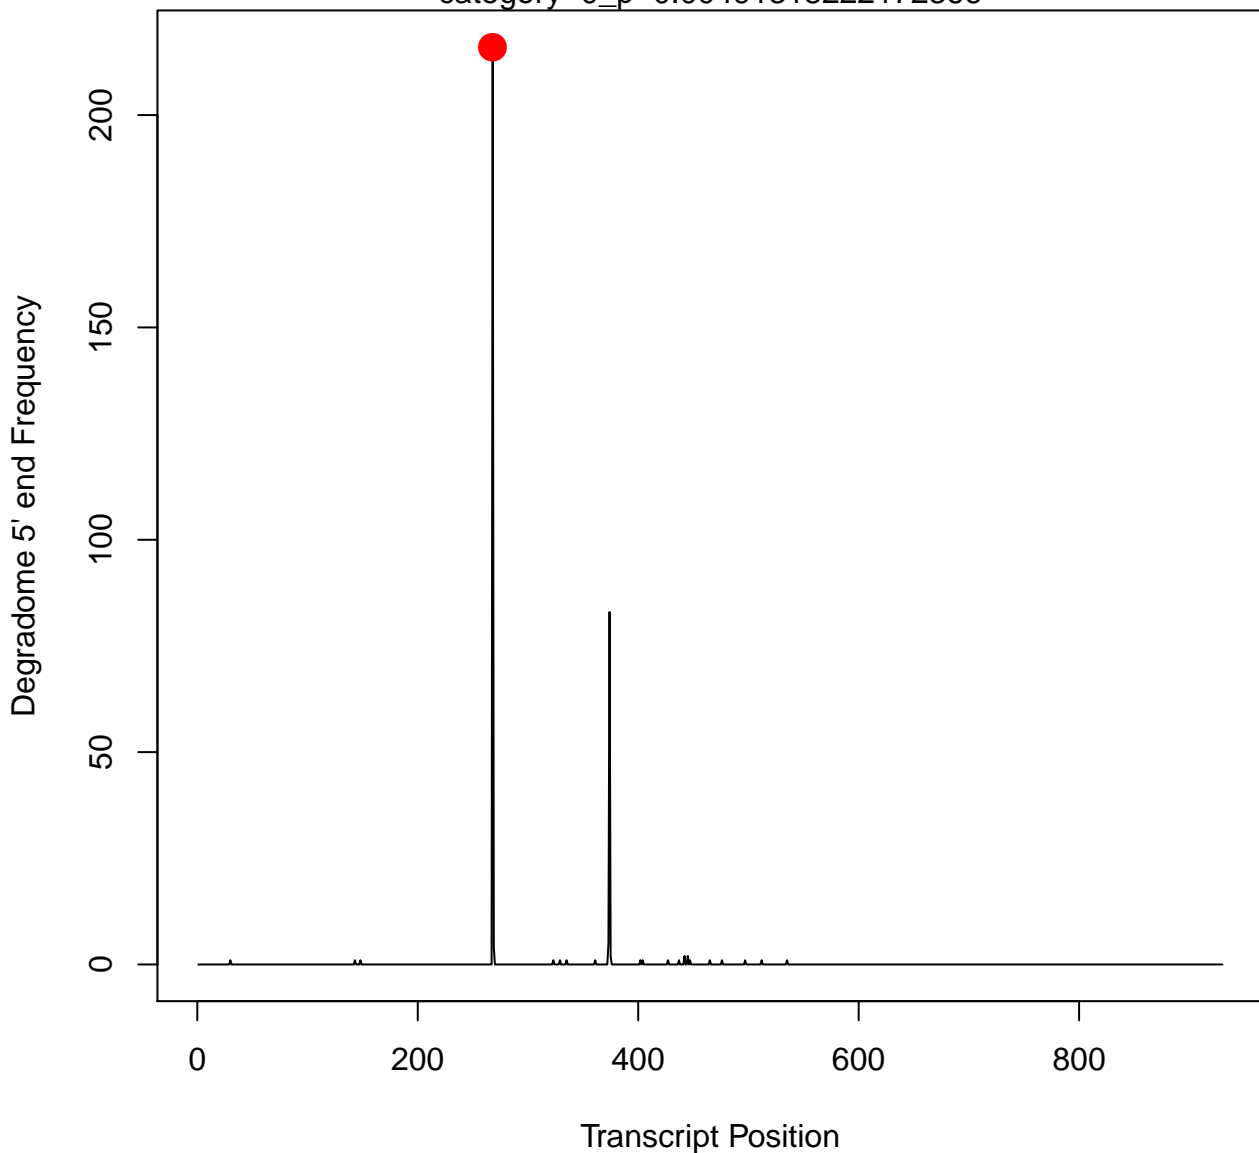

Supplement: s1 [file s1]

**T=Cluster-18410.78482\_Q=novel\_144\_S=937**

category=2\_p=0.0229647072699788

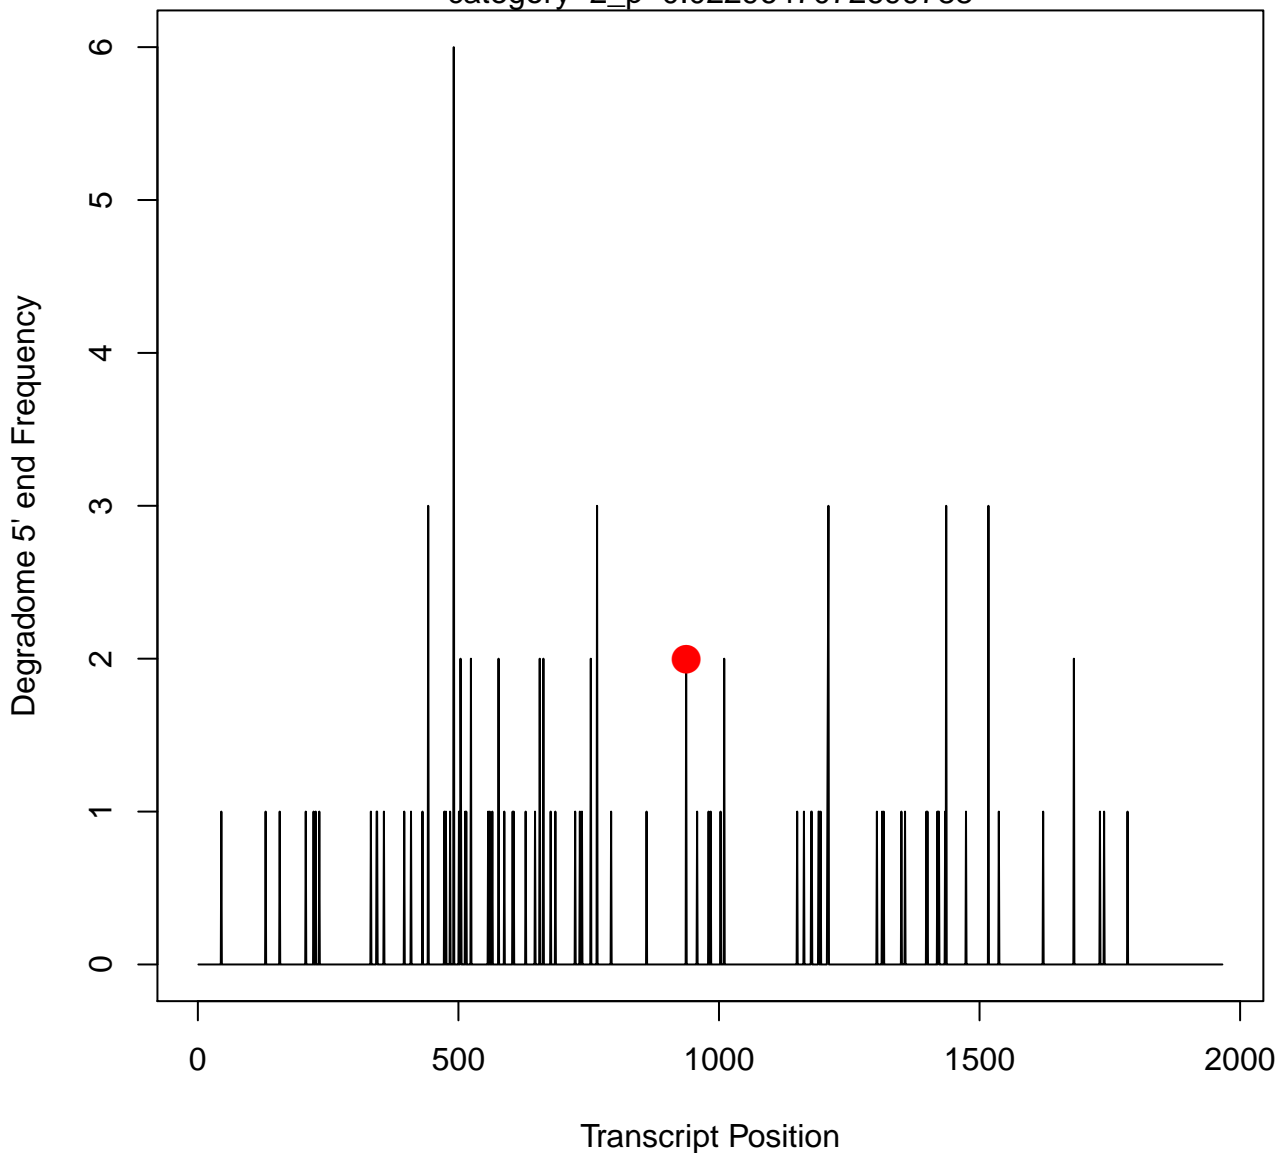

Supplement: s1 [file s1]

**T=Cluster-12109.0\_Q=novel\_6\_S=50**

category=0\_p=0.00817521894783257

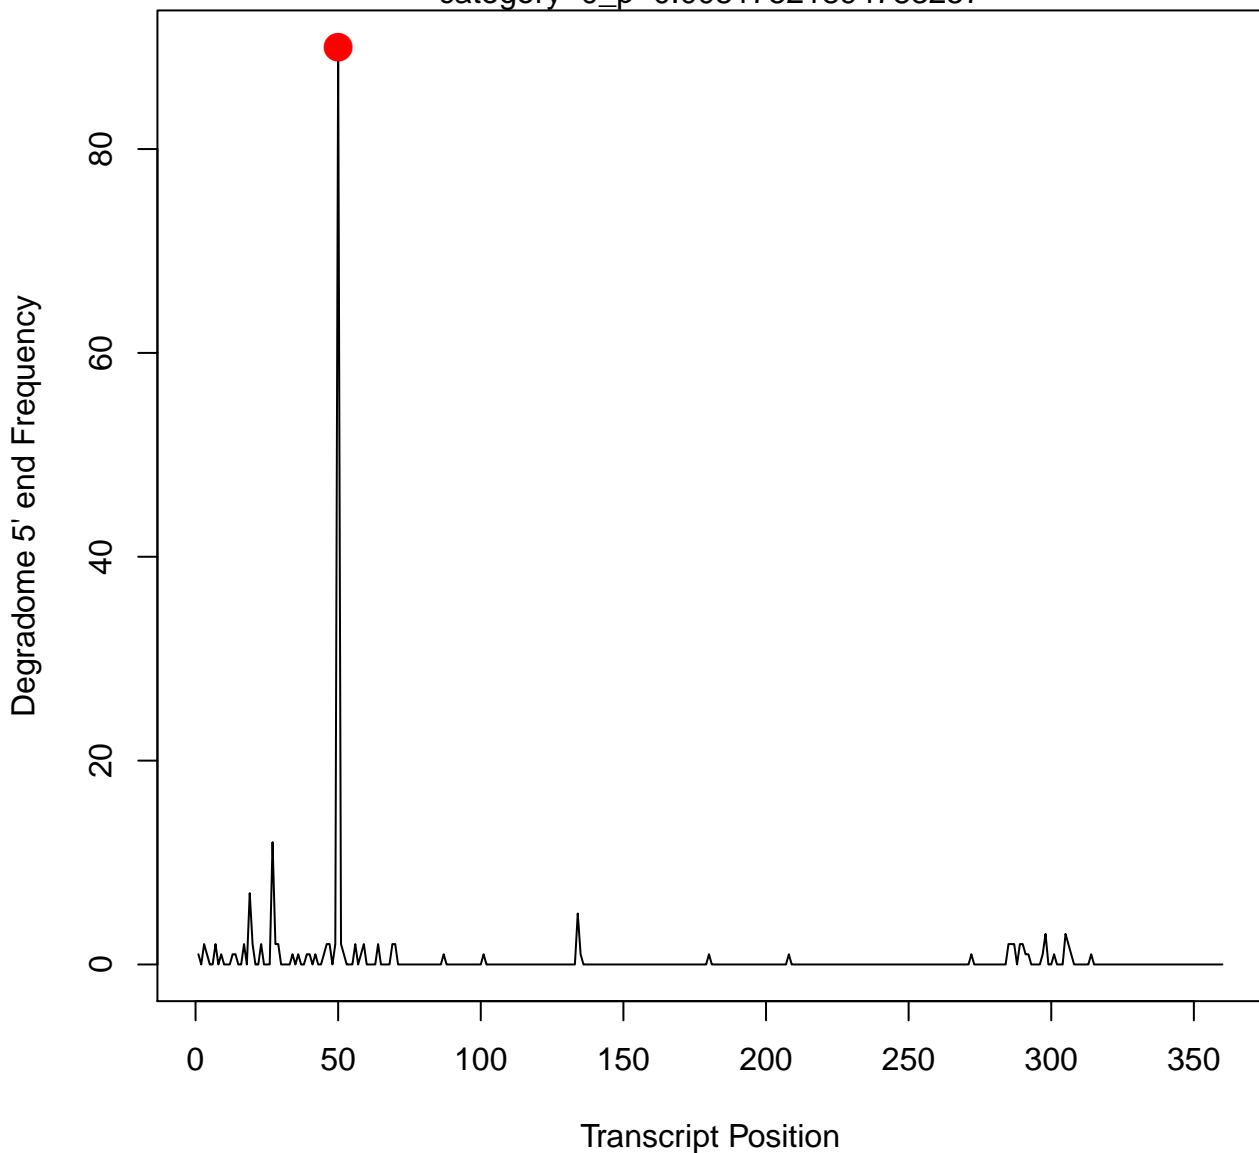

Supplement: s1 [file s1]

**T=Cluster-18410.70697\_Q=novel\_106\_S=857**

category=0\_p=0.00191355797950399

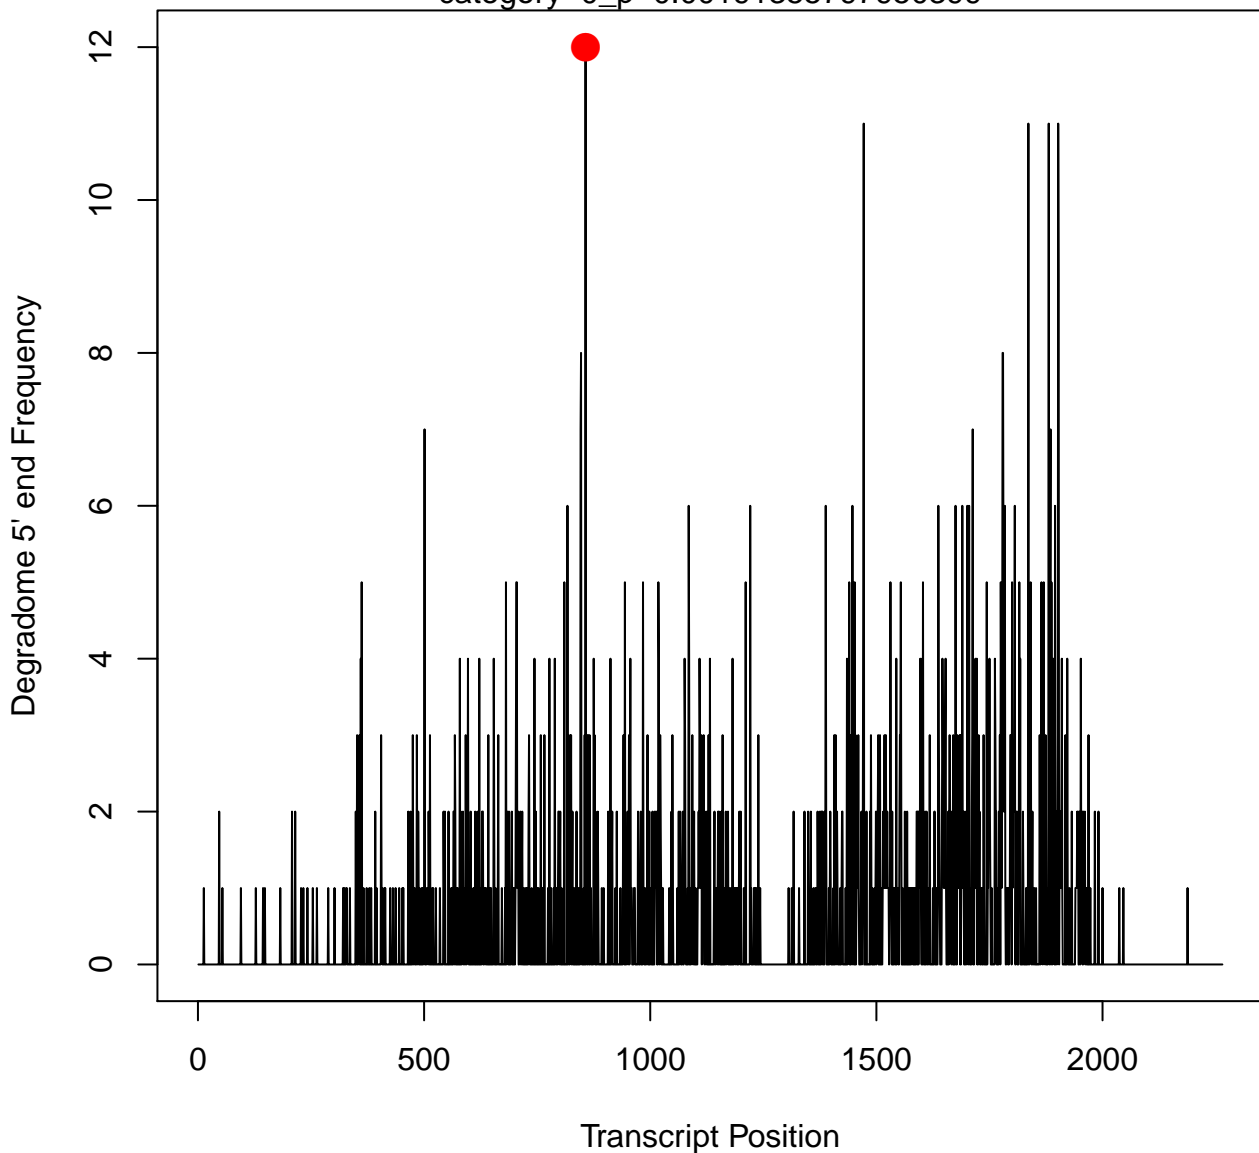

Supplement: s1 [file s1]

**T=Cluster-18410.24961\_Q=pma-miR482a\_S=363**

category=0\_p=0.00464086203705827

Degradome 5' end Frequency

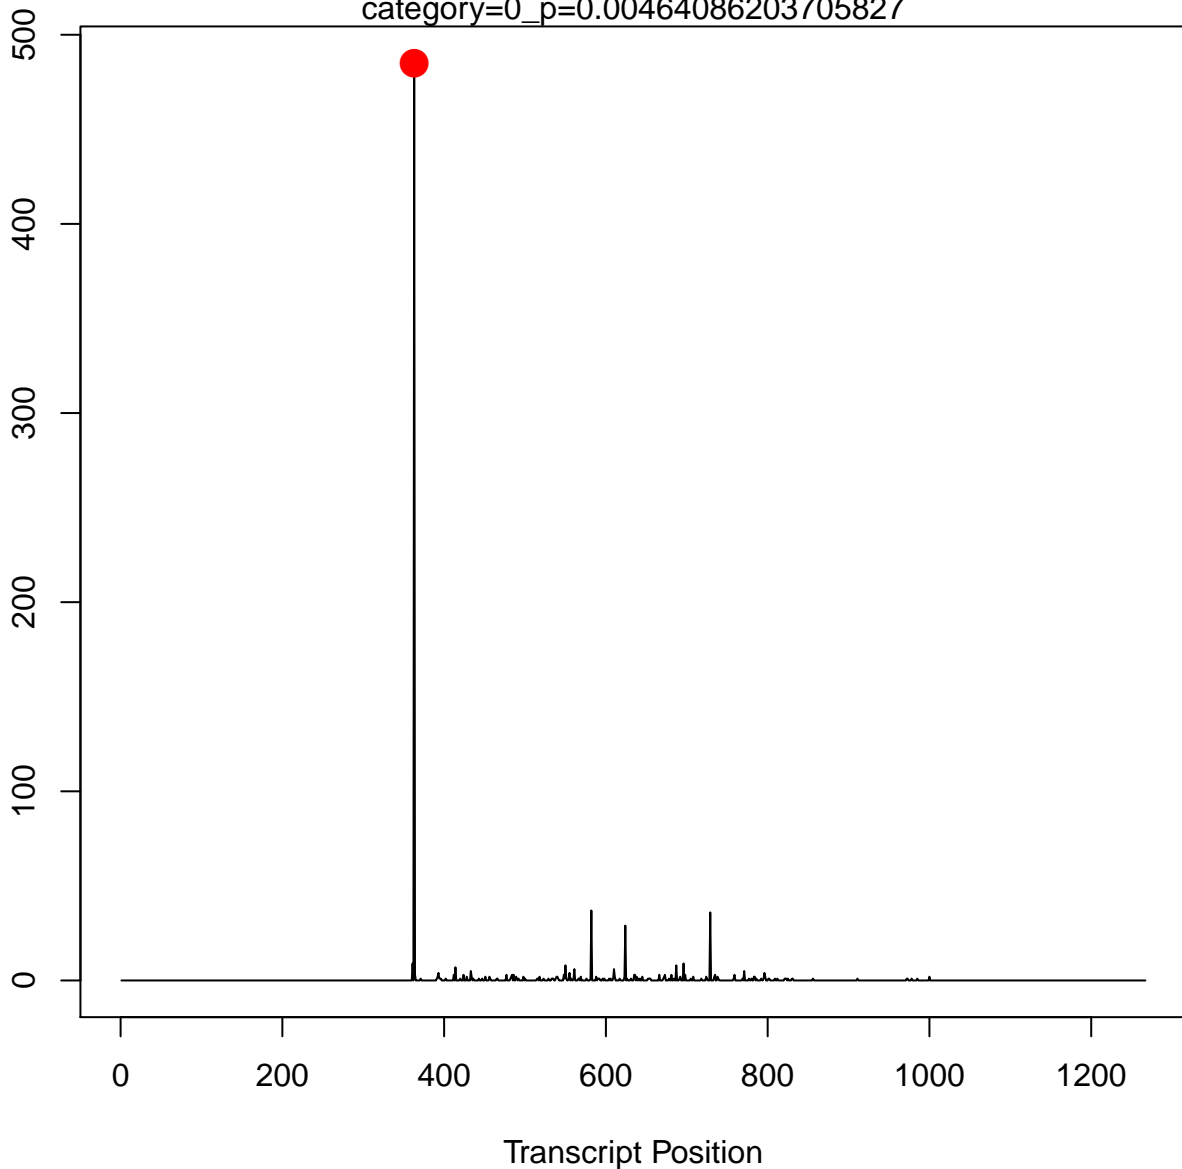

Supplement: s1 [file s1]

**T=Cluster-18410.26942\_Q=pma-miR396\_S=1377**

category=2\_p=0.0454020367599618

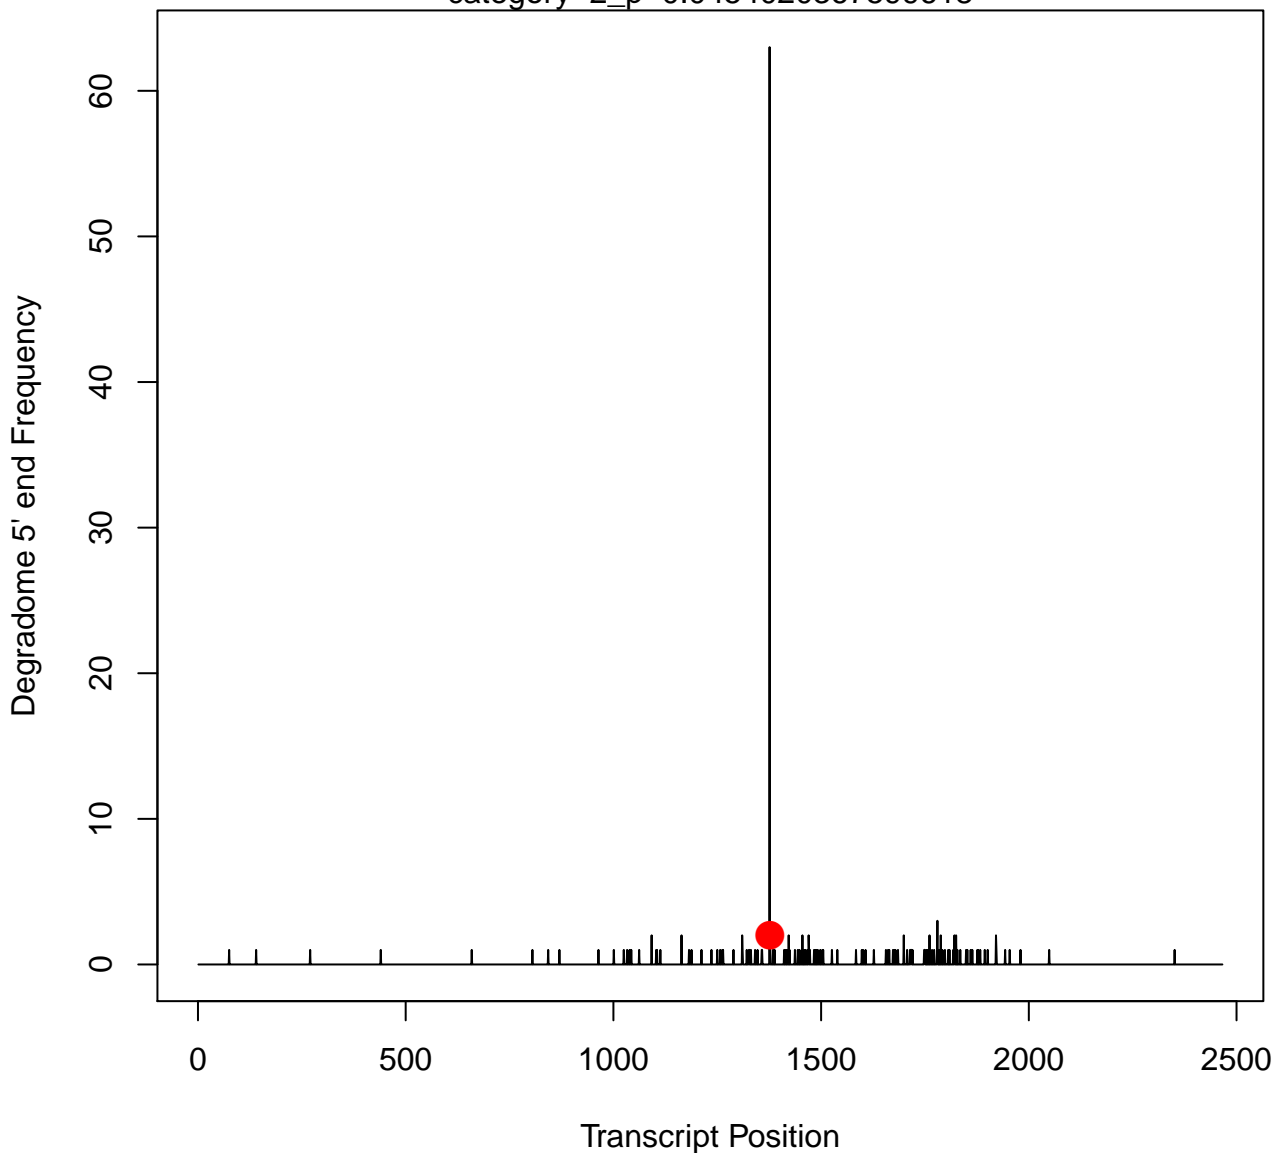

Supplement: s1 [file s1]

**T=Cluster-18410.106078\_Q=novel\_177\_S=45**

category=0\_p=0.00027358987754178

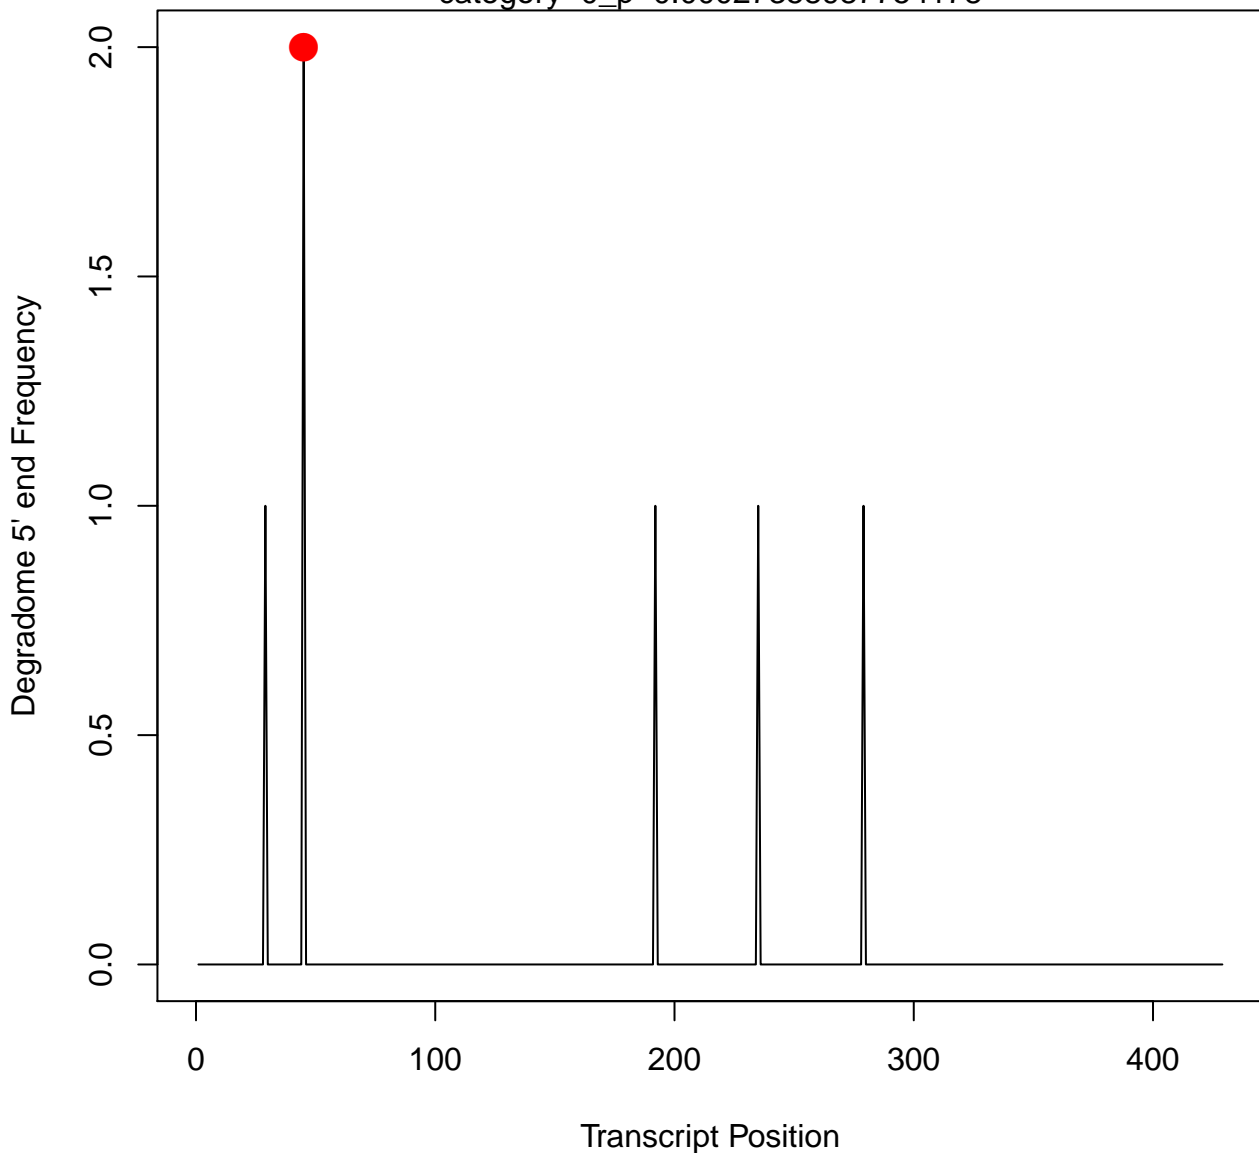

Supplement: s1 [file s1]

**T=Cluster-12032.0\_Q=novel\_32\_S=35**

category=3\_p=0.0320427934108476

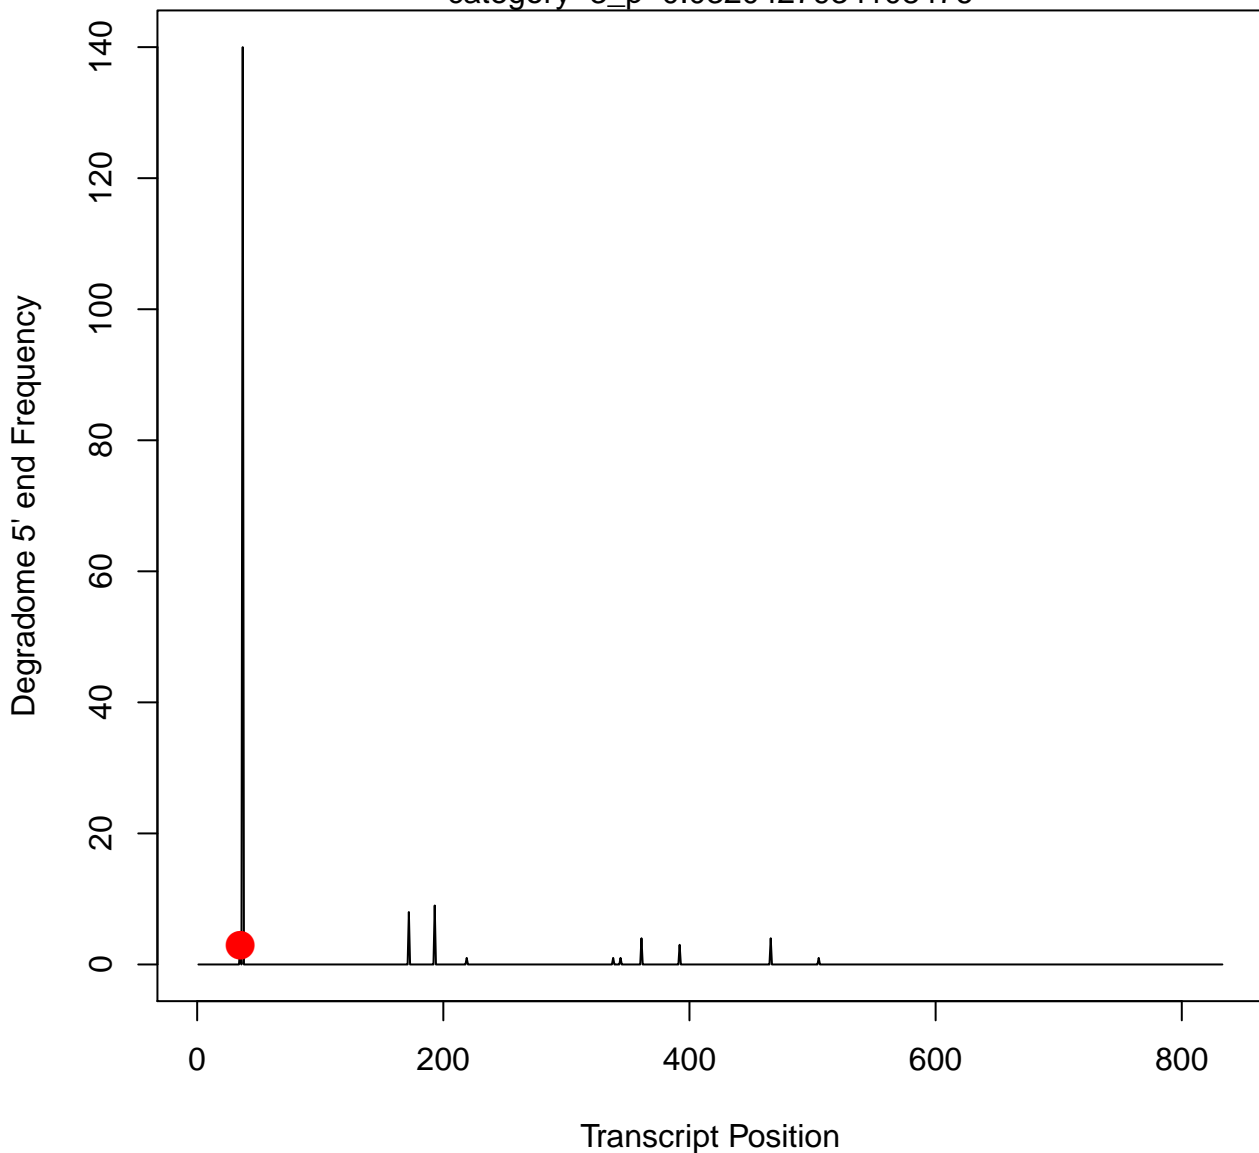

Supplement: s1 [file s1]

**T=Cluster-18410.69870\_Q=novel\_32\_S=925**

category=0\_p=0.00245961596621247

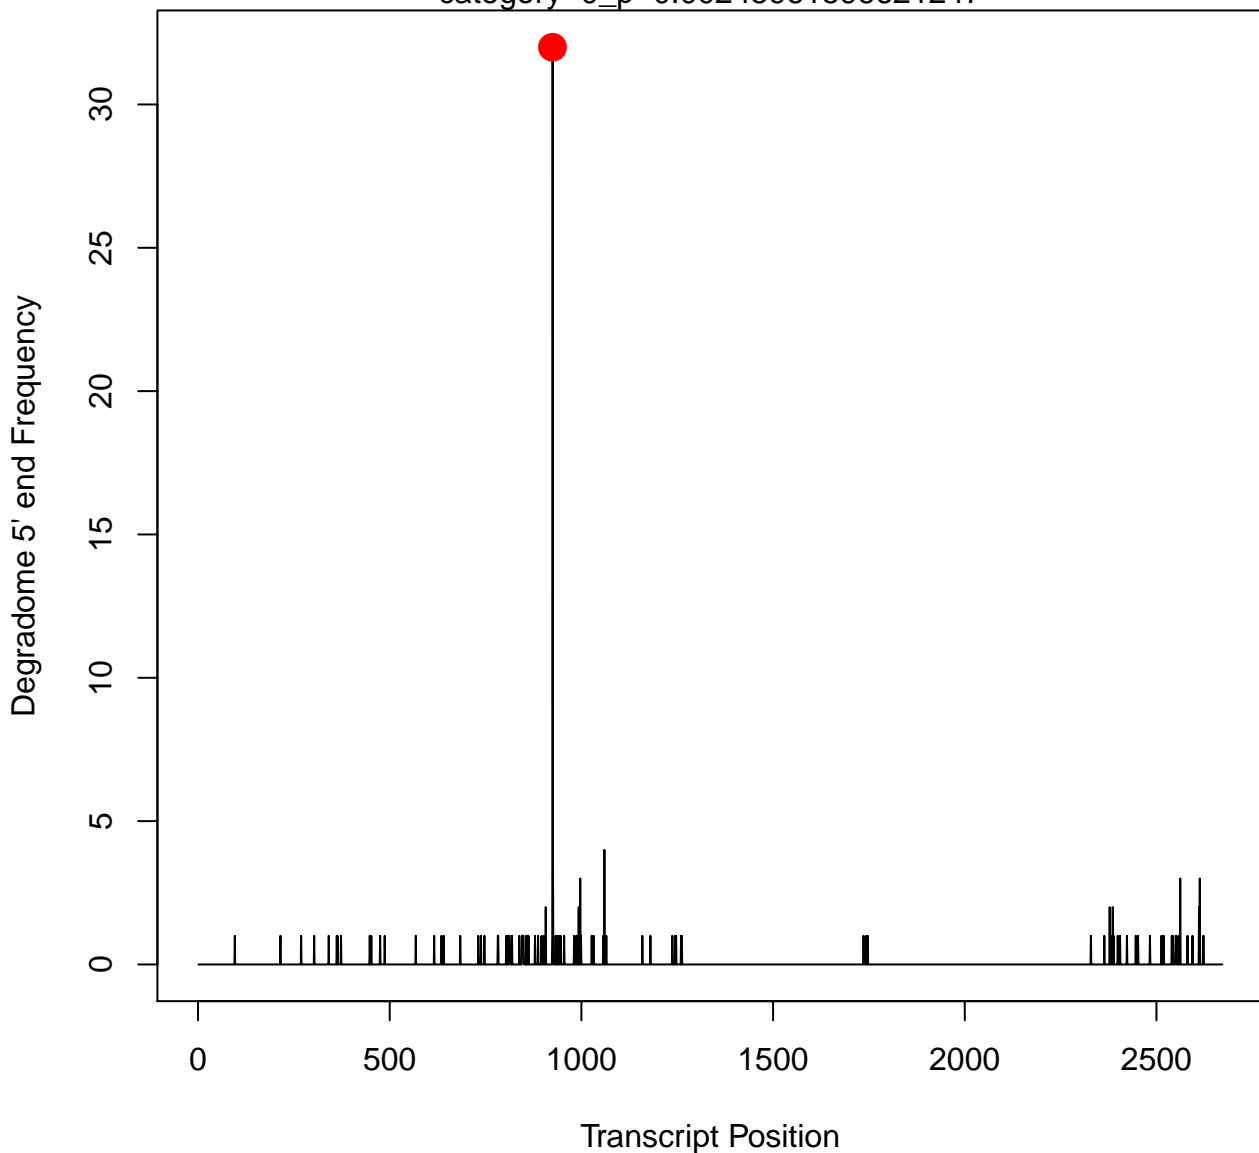

Supplement: s1 [file s1]

**T=Cluster-18410.78752\_Q=novel\_47\_S=156**

category=0\_p=0.0130482348291631

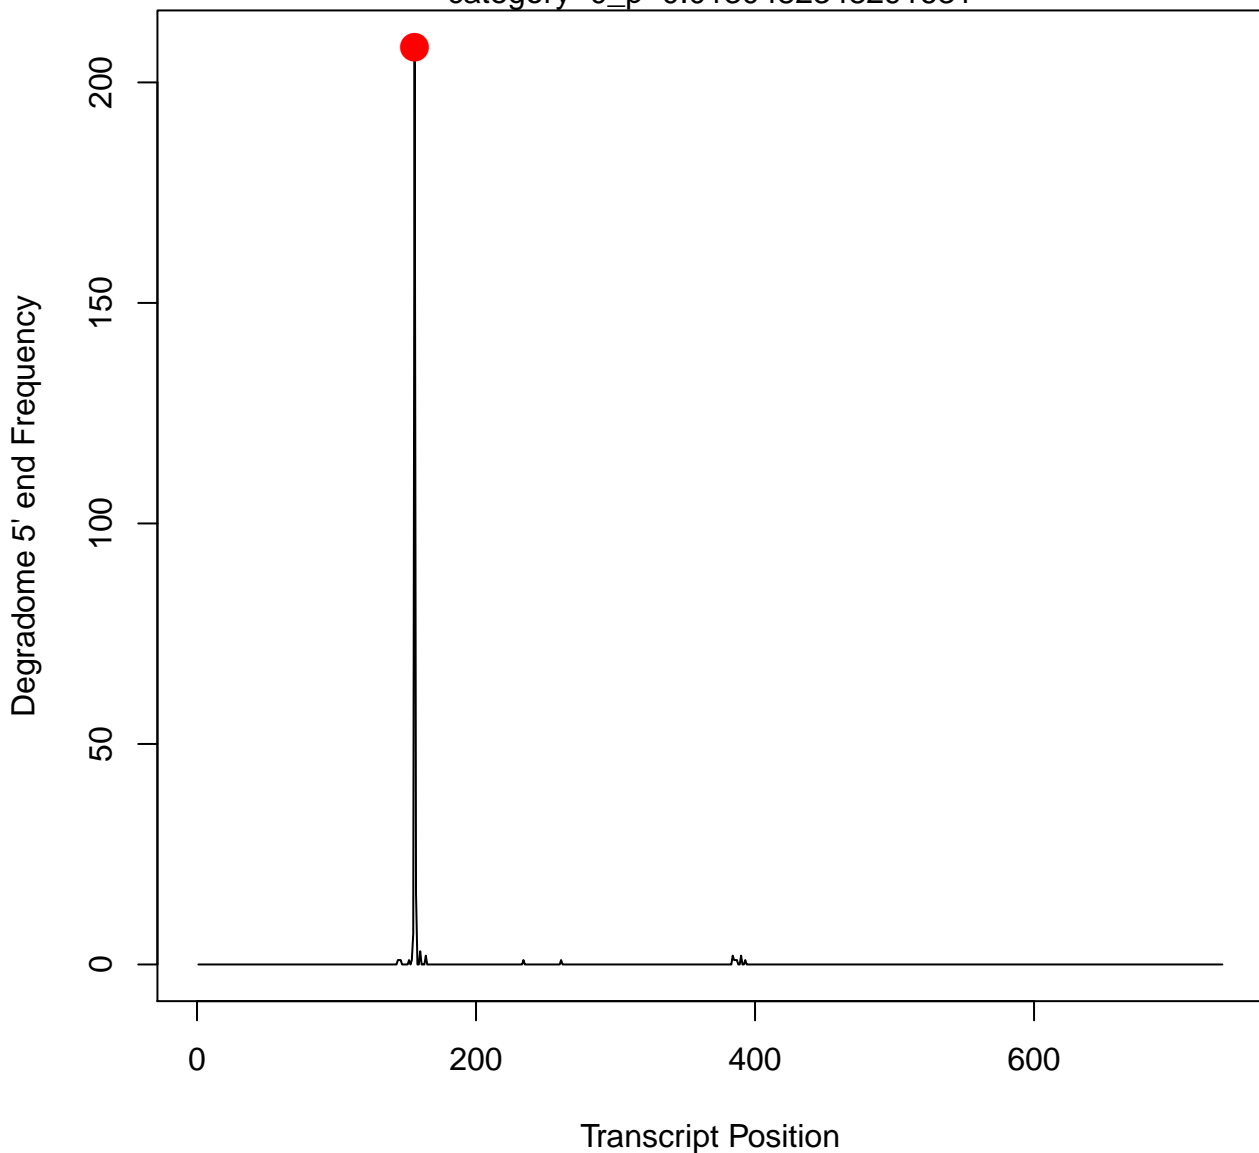

Supplement: s1 [file s1]

**T=Cluster-18410.30218\_Q=novel\_41\_S=241**

category=0\_p=0.00164041690342198

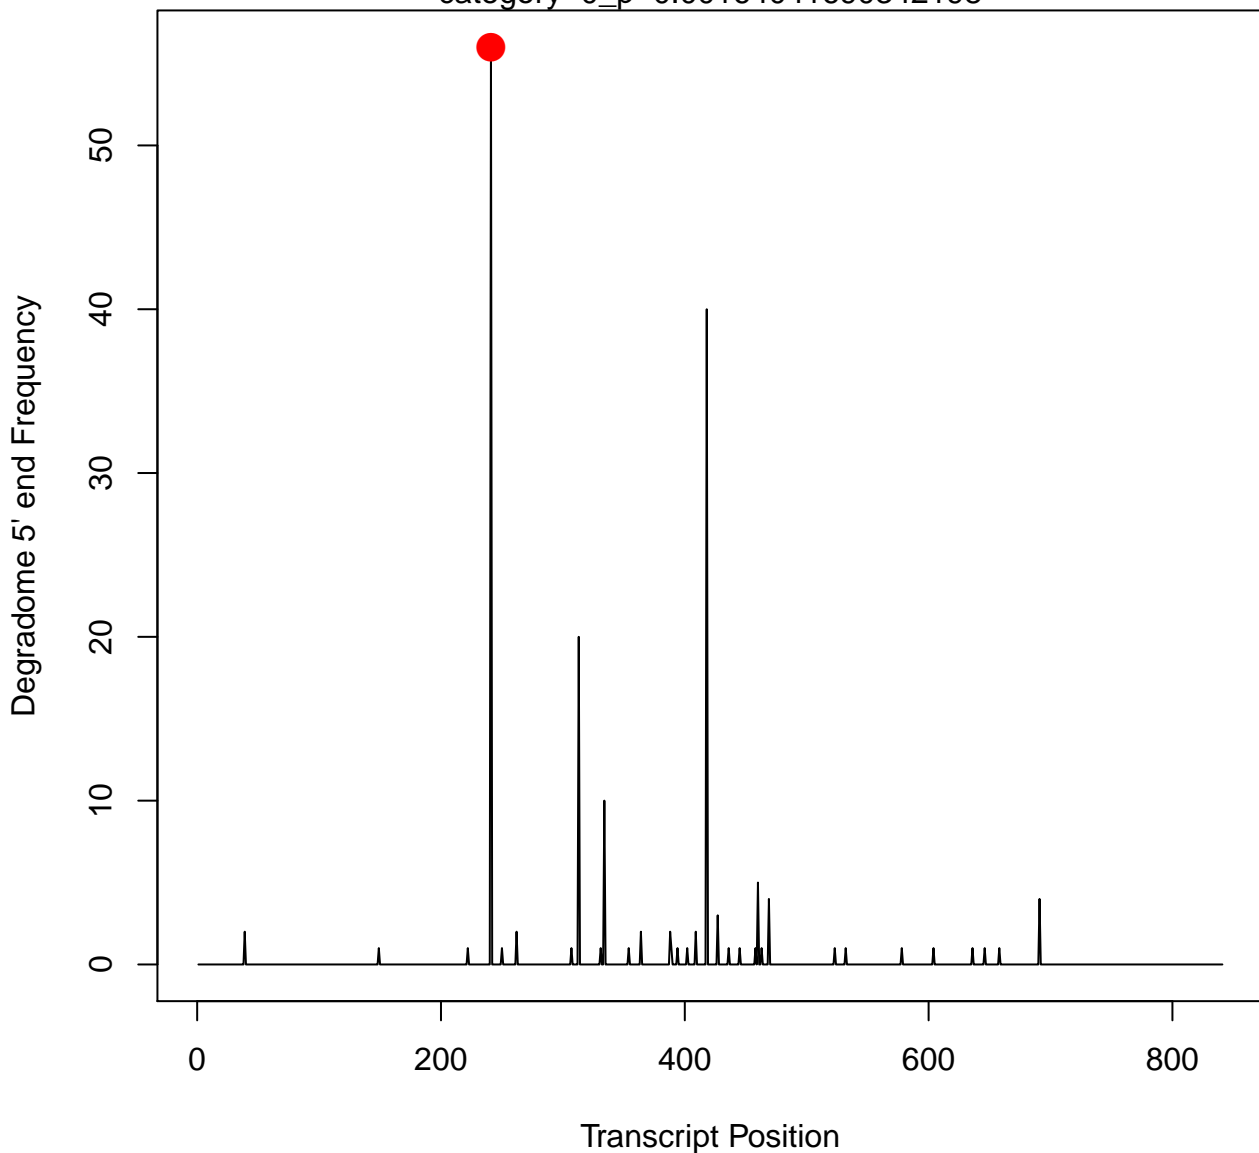

Supplement: s1 [file s1]

**T=Cluster-18410.32911\_Q=novel\_35\_S=502**

category=0\_p=0.0040959980740275

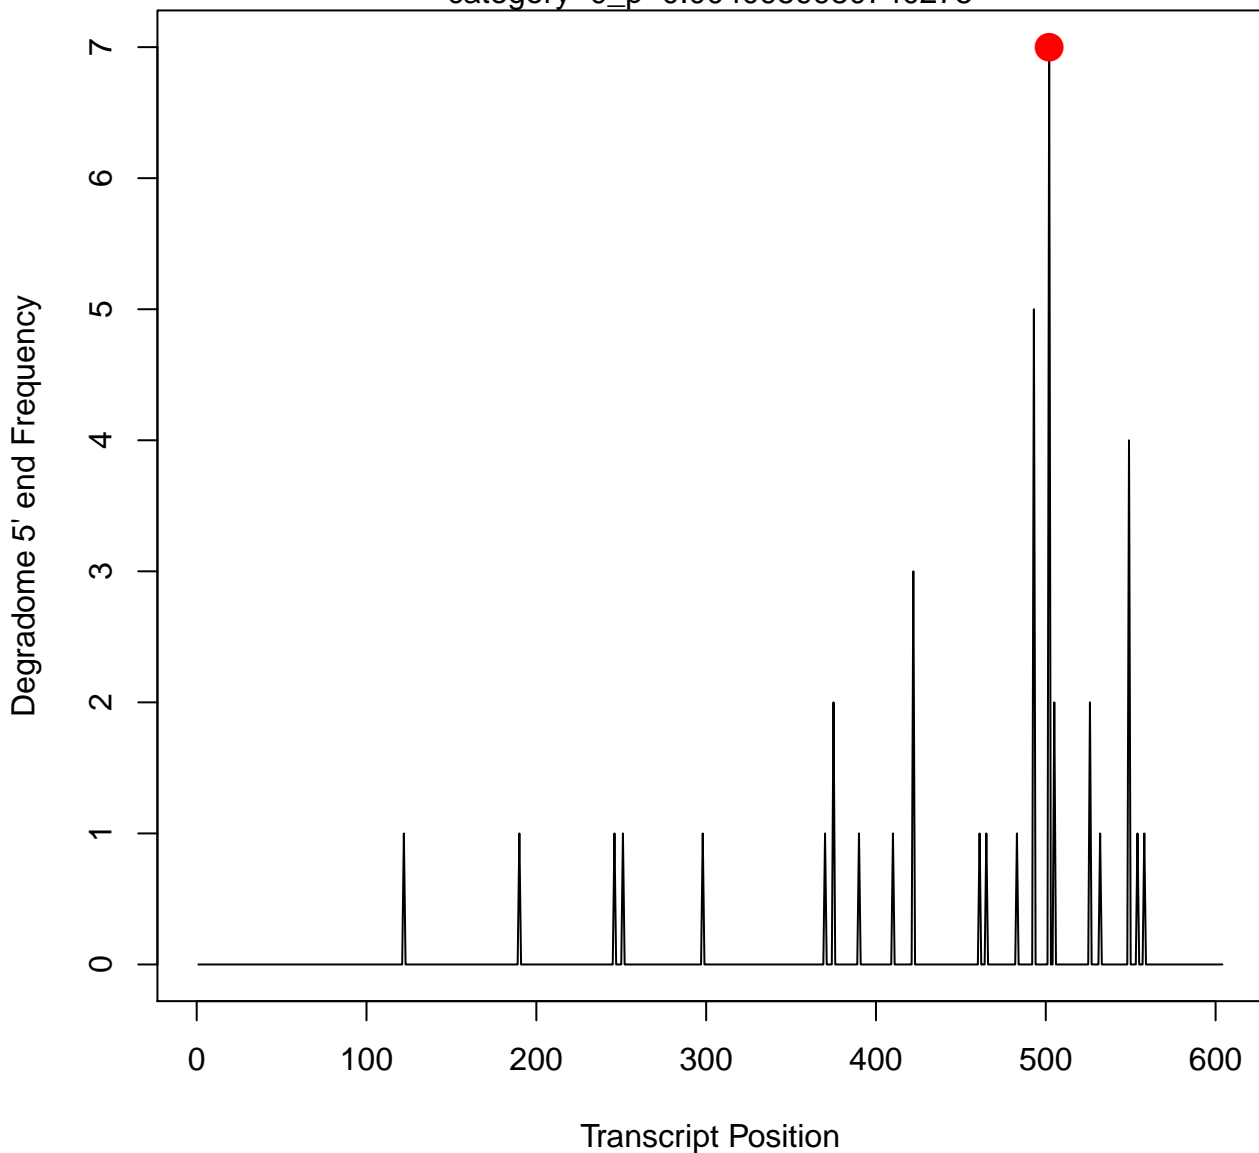

Supplement: s1 [file s1]

**T=Cluster-18410.51835\_Q=novel\_158\_S=103**

category=2\_p=0.0454020367599618

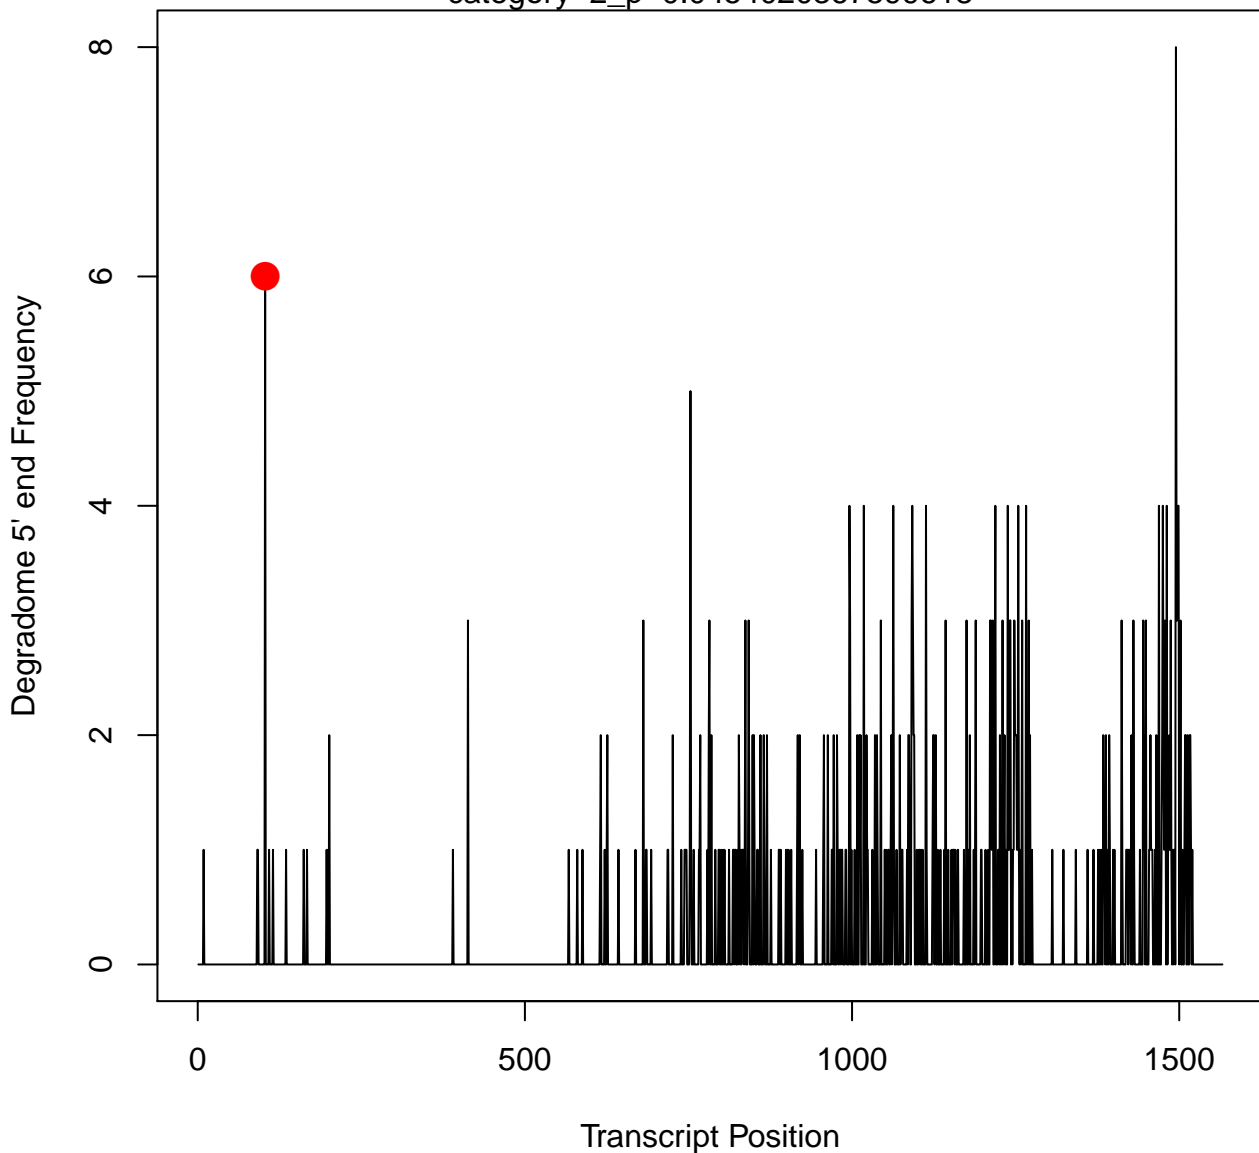

Supplement: s1 [file s1]

**T=Cluster-18410.117206\_Q=novel\_72\_S=222**

category=0\_p=0.00027358987754178

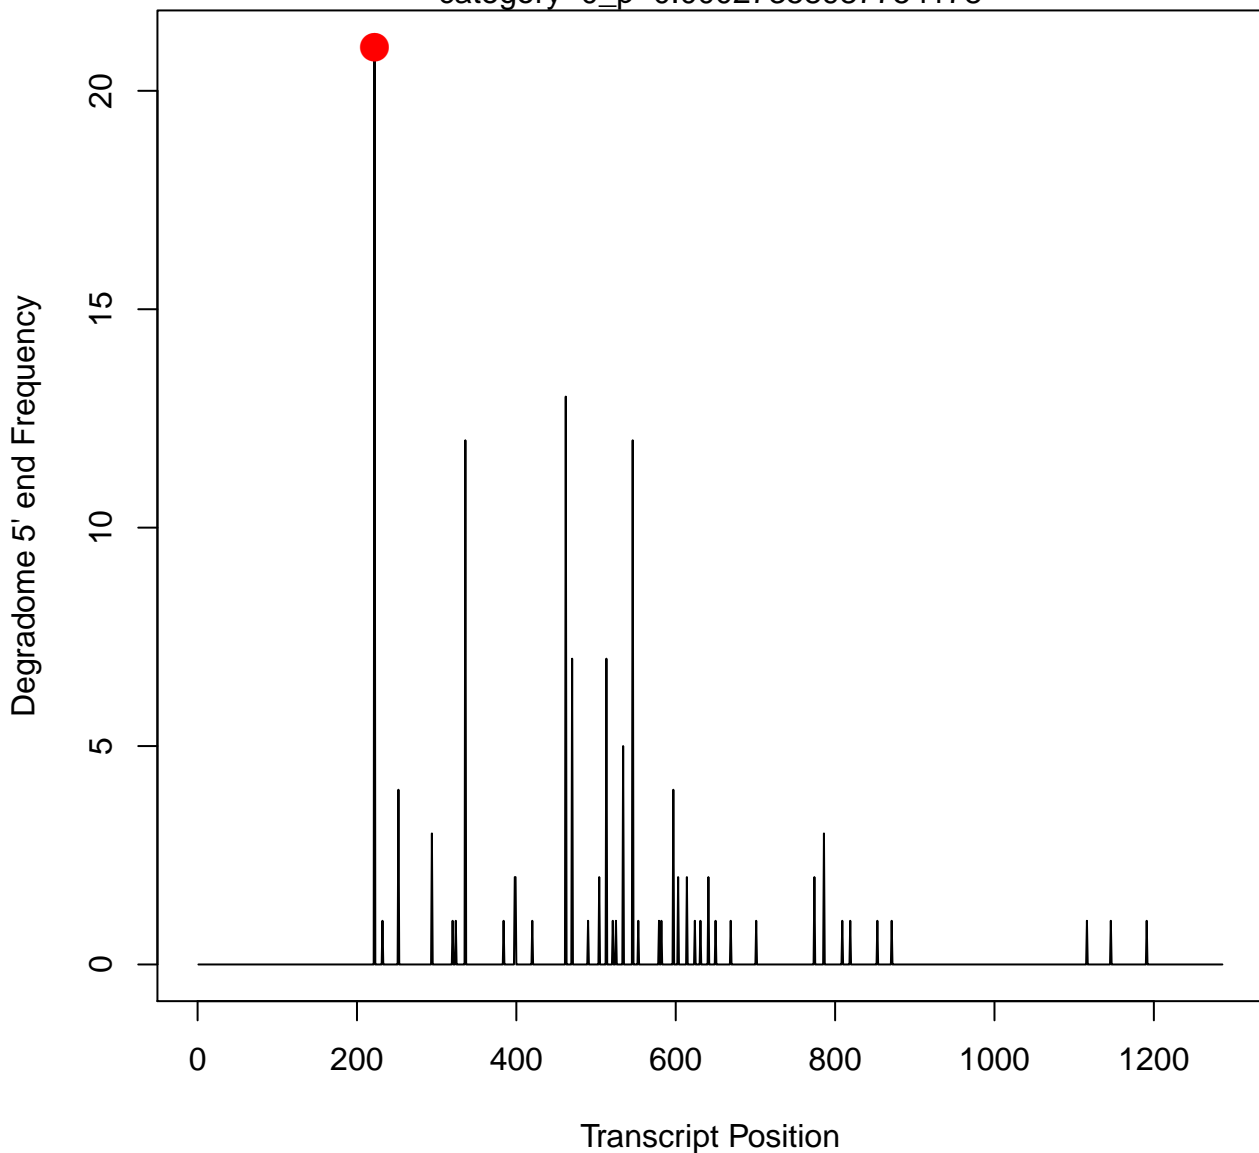

Supplement: s1 [file s1]

**T=Cluster-18410.65165\_Q=novel\_189\_S=436**

category=0\_p=0.0770431560473814

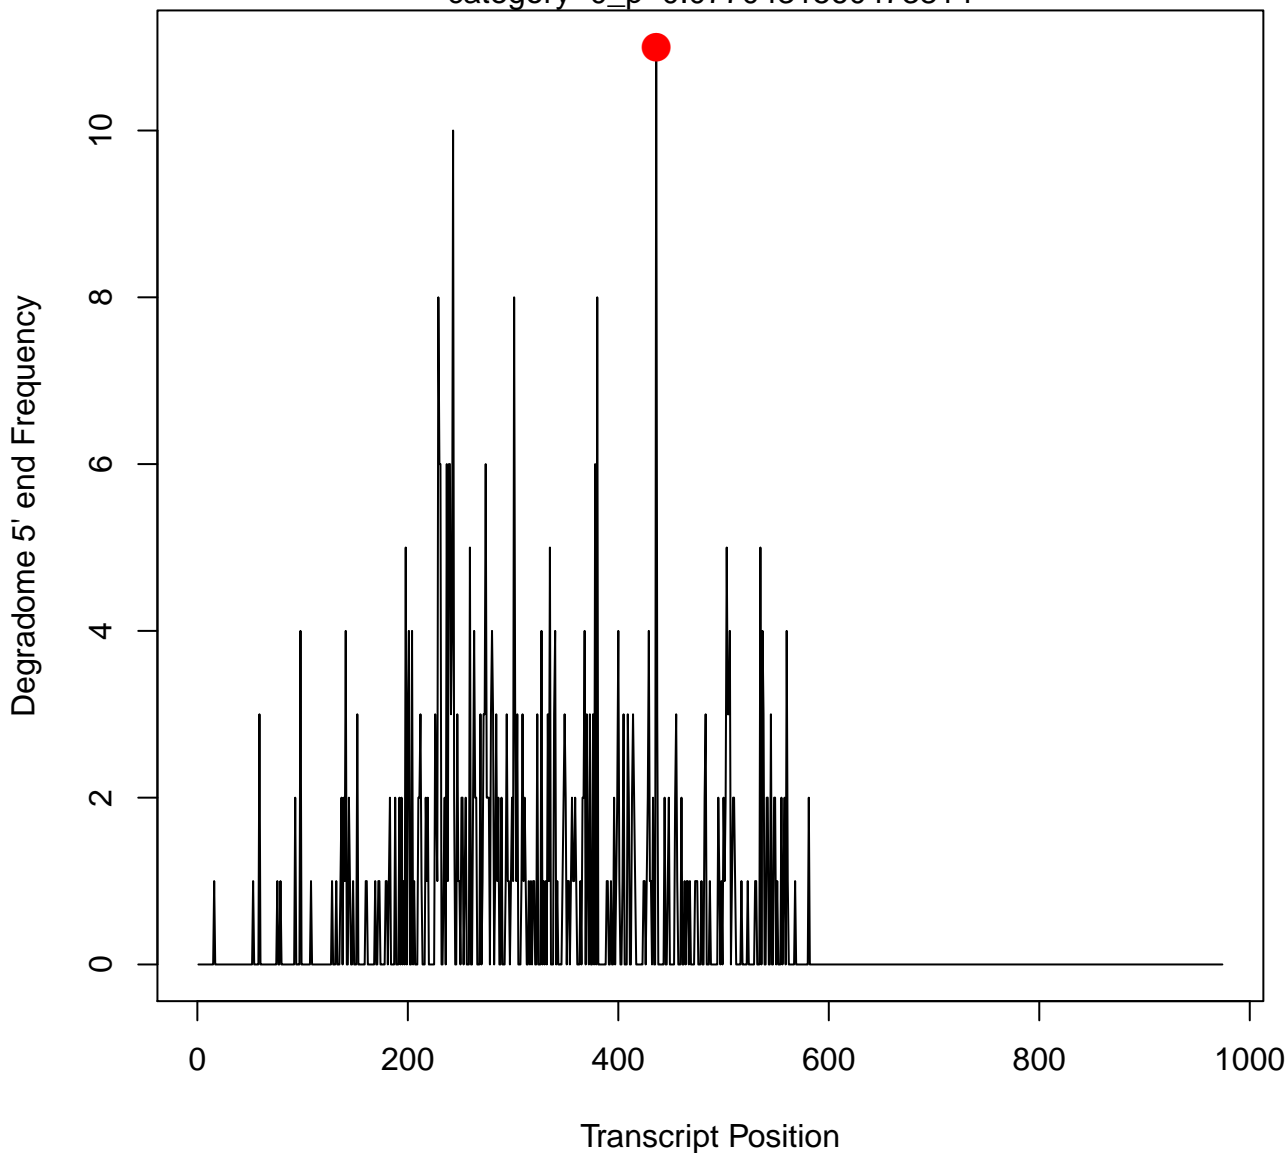

Supplement: s1 [file s1]

**T=Cluster-18410.61121\_Q=novel\_87\_S=249**

category=2\_p=0.0229647072699788

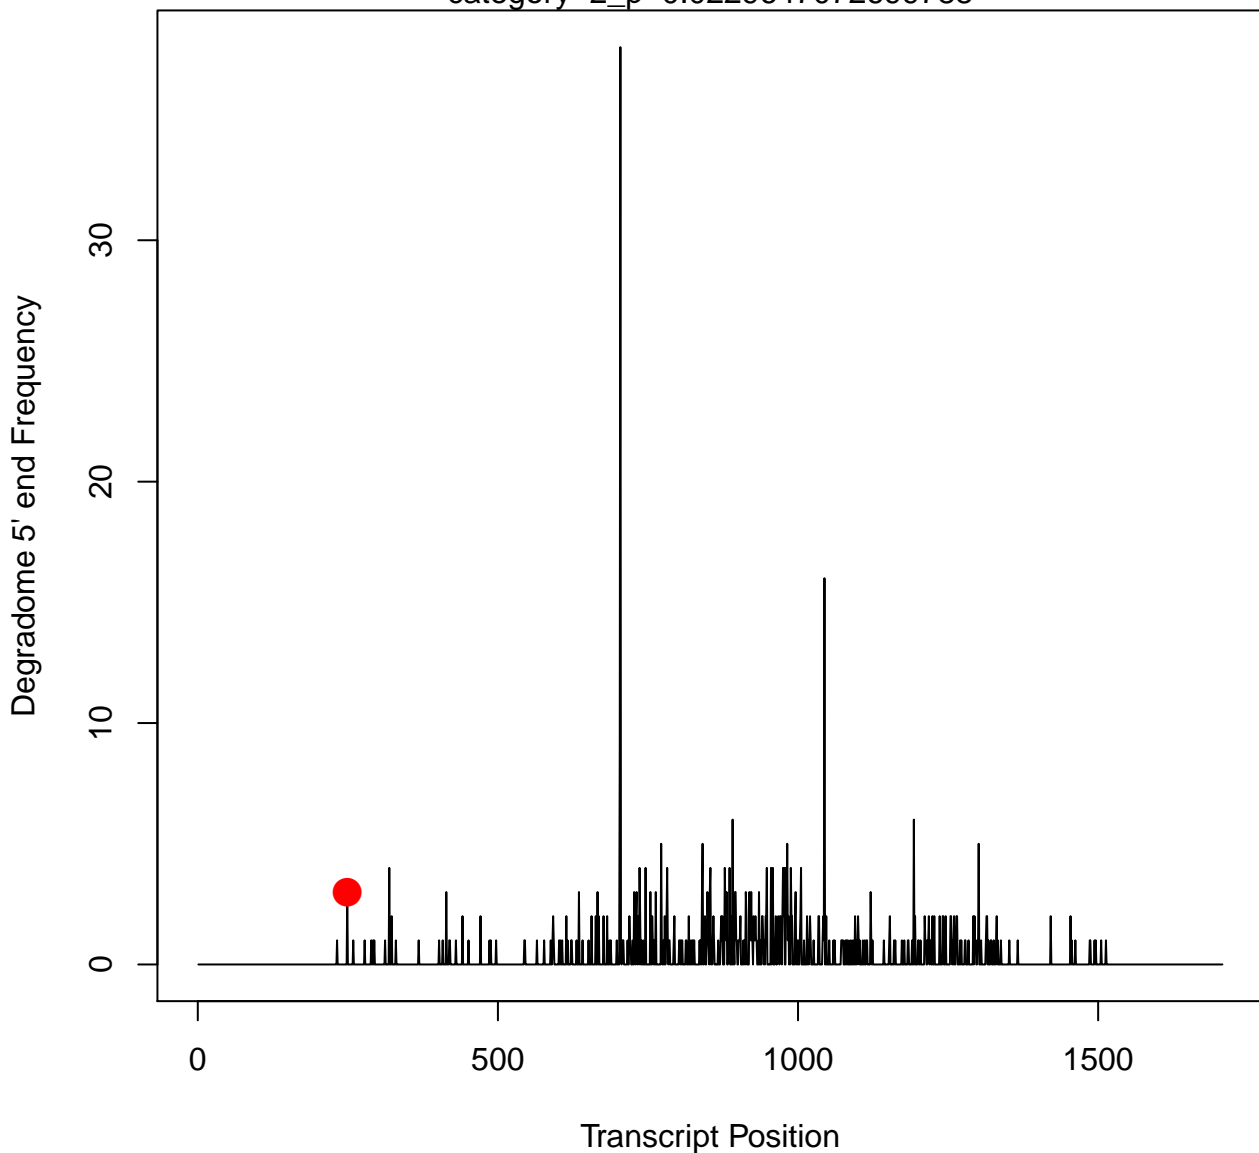

Supplement: s1 [file s1]

**T=Cluster-18410.28952\_Q=novel\_90\_S=3520**

category=0\_p=0.00245961596621247

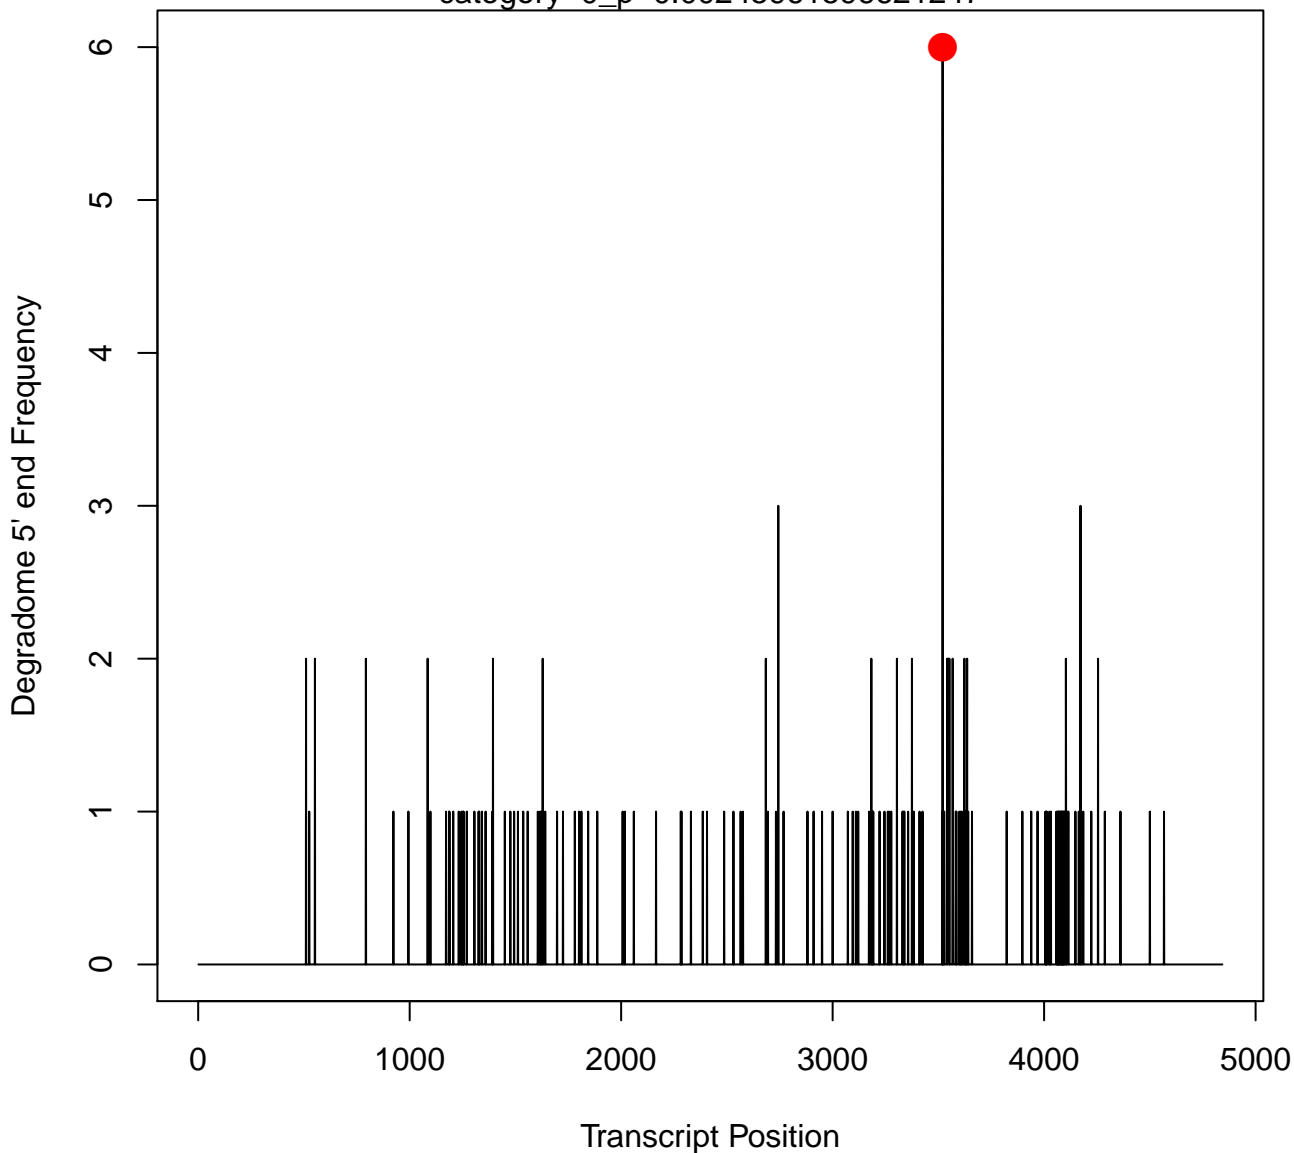

Supplement: s1 [file s1]

**T=Cluster-18410.6473\_Q=novel\_168\_S=849**

category=0\_p=0.0307120152379934

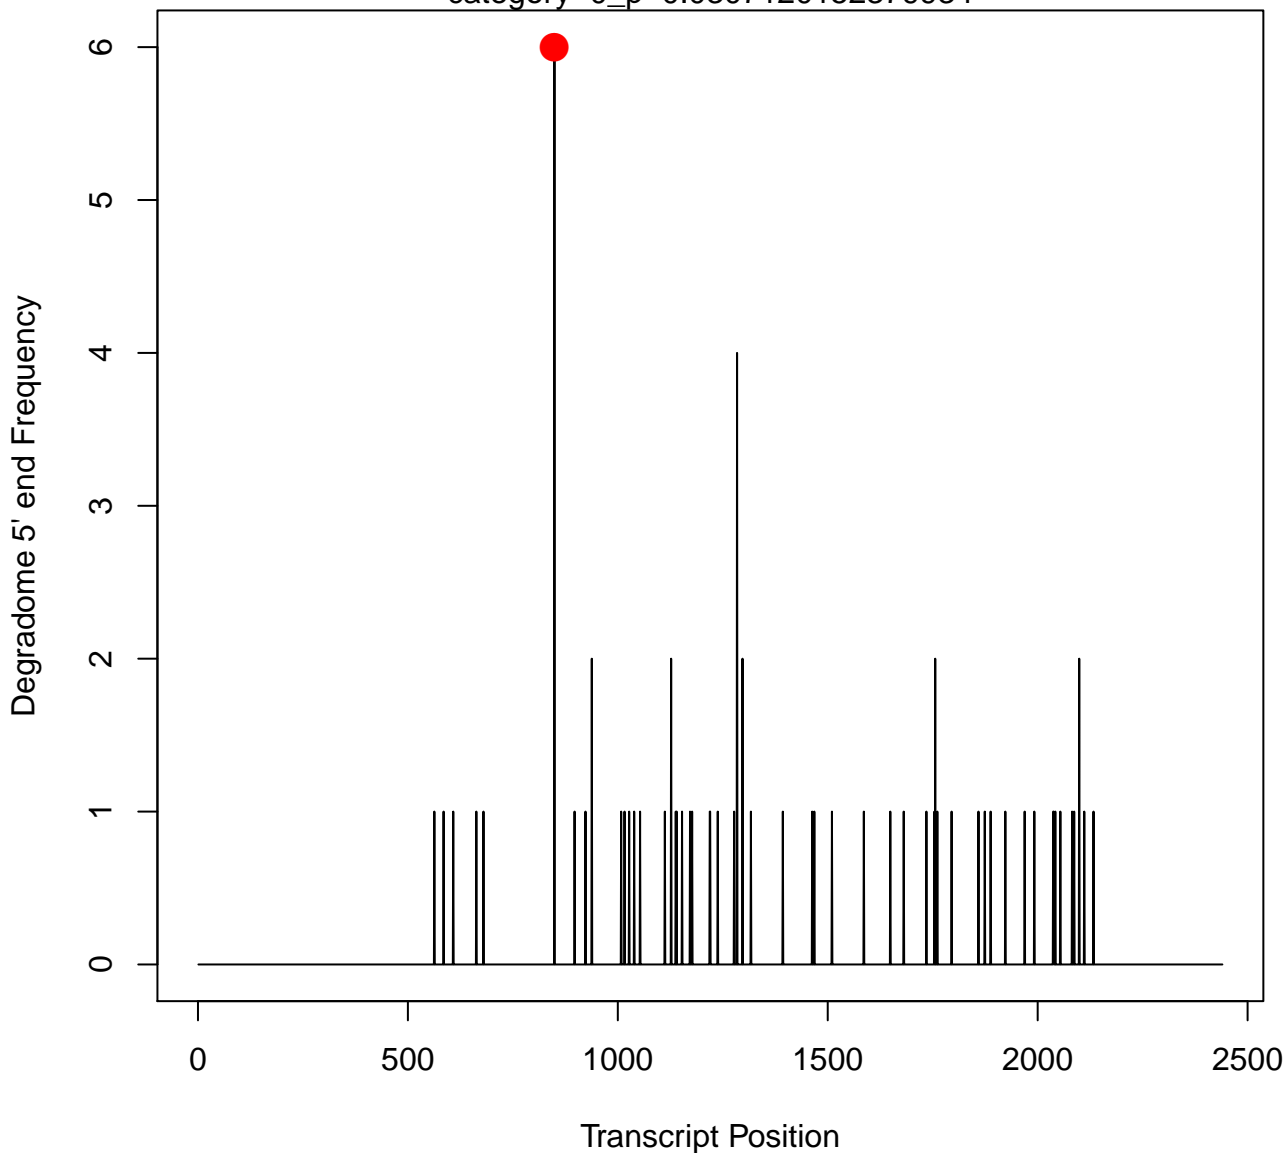

Supplement: s1 [file s1]

**T=Cluster-18410.58587\_Q=novel\_167\_S=537**

category=3\_p=0.0054131956921798

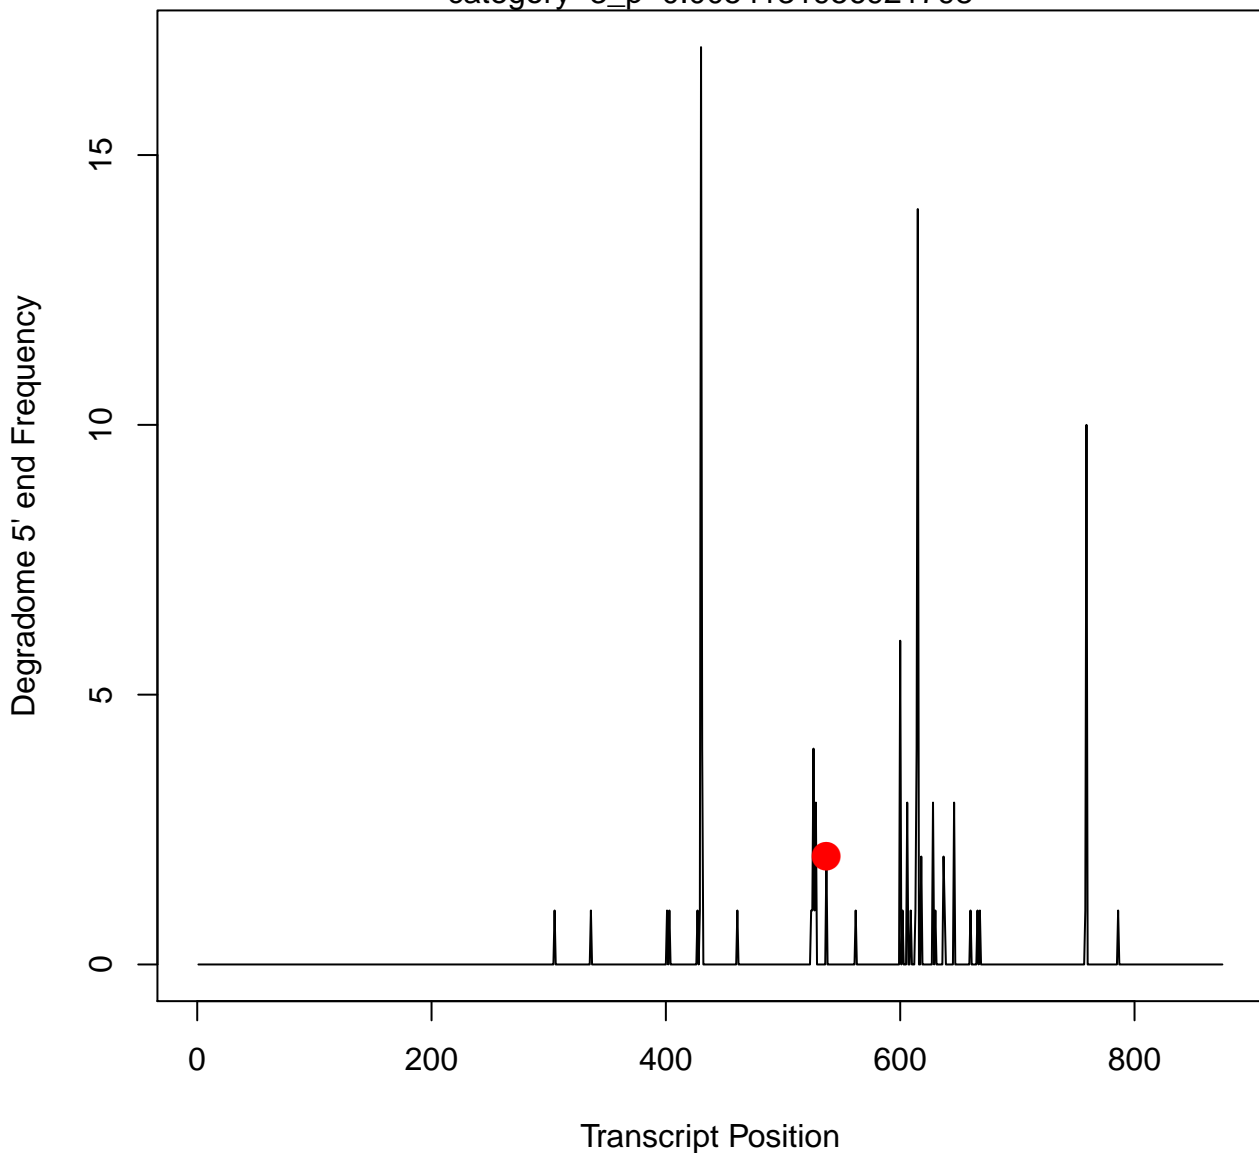

Supplement: s1 [file s1]

**T=Cluster-20042.0\_Q=pma-miR951\_S=343**

category=0\_p=0.0130482348291631

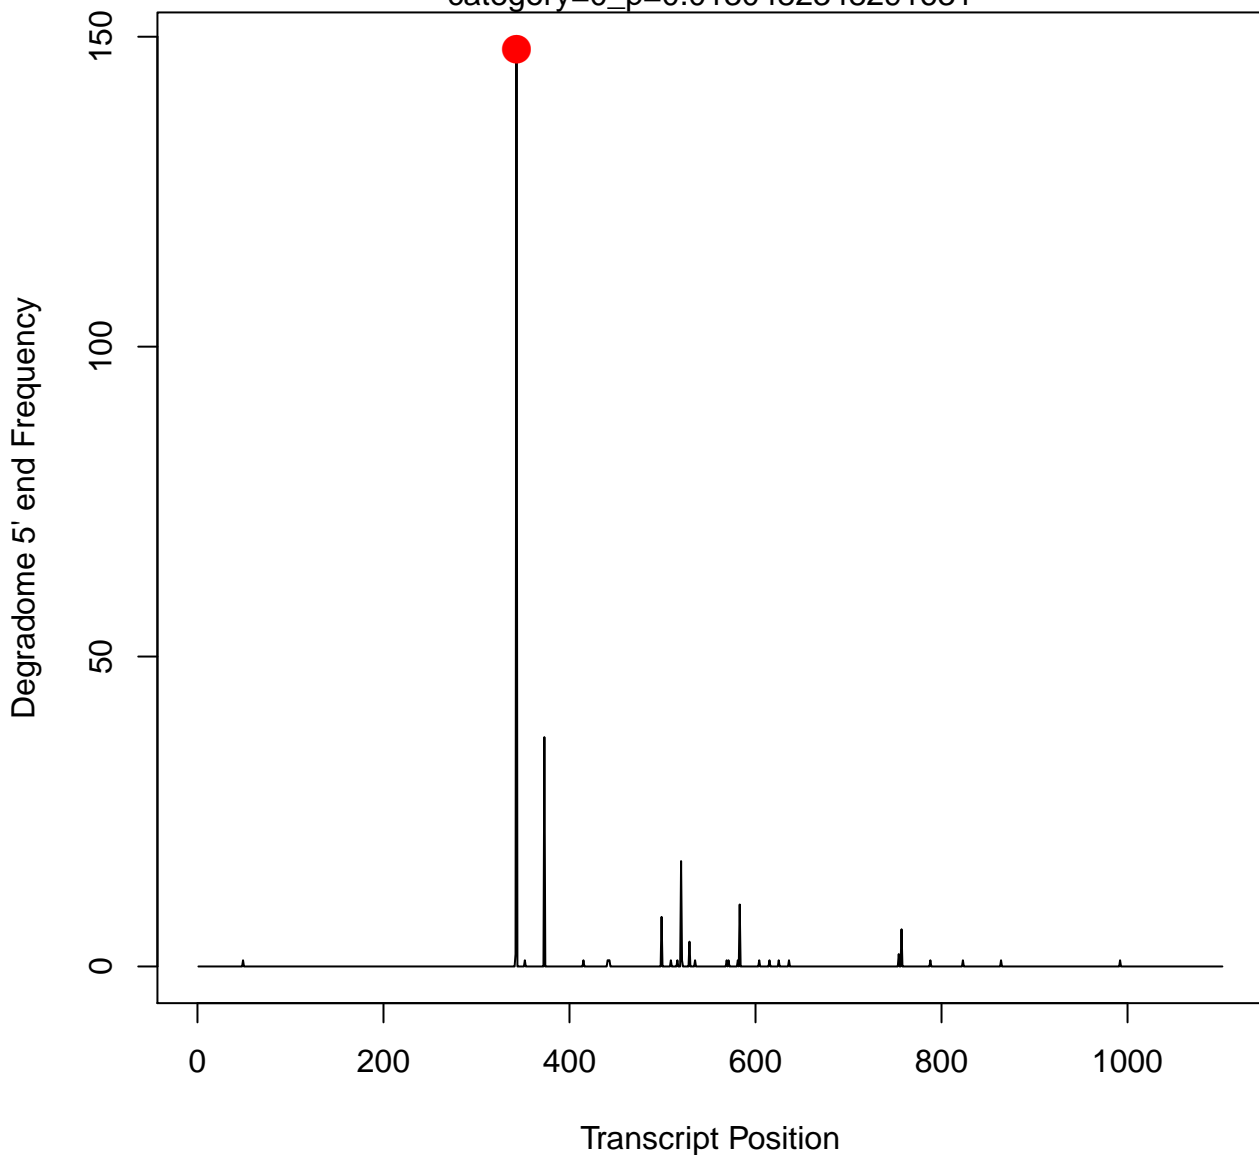

Supplement: s1 [file s1]

**T=Cluster-18410.87242\_Q=novel\_65\_S=826**

category=0\_p=0.000820545098840553

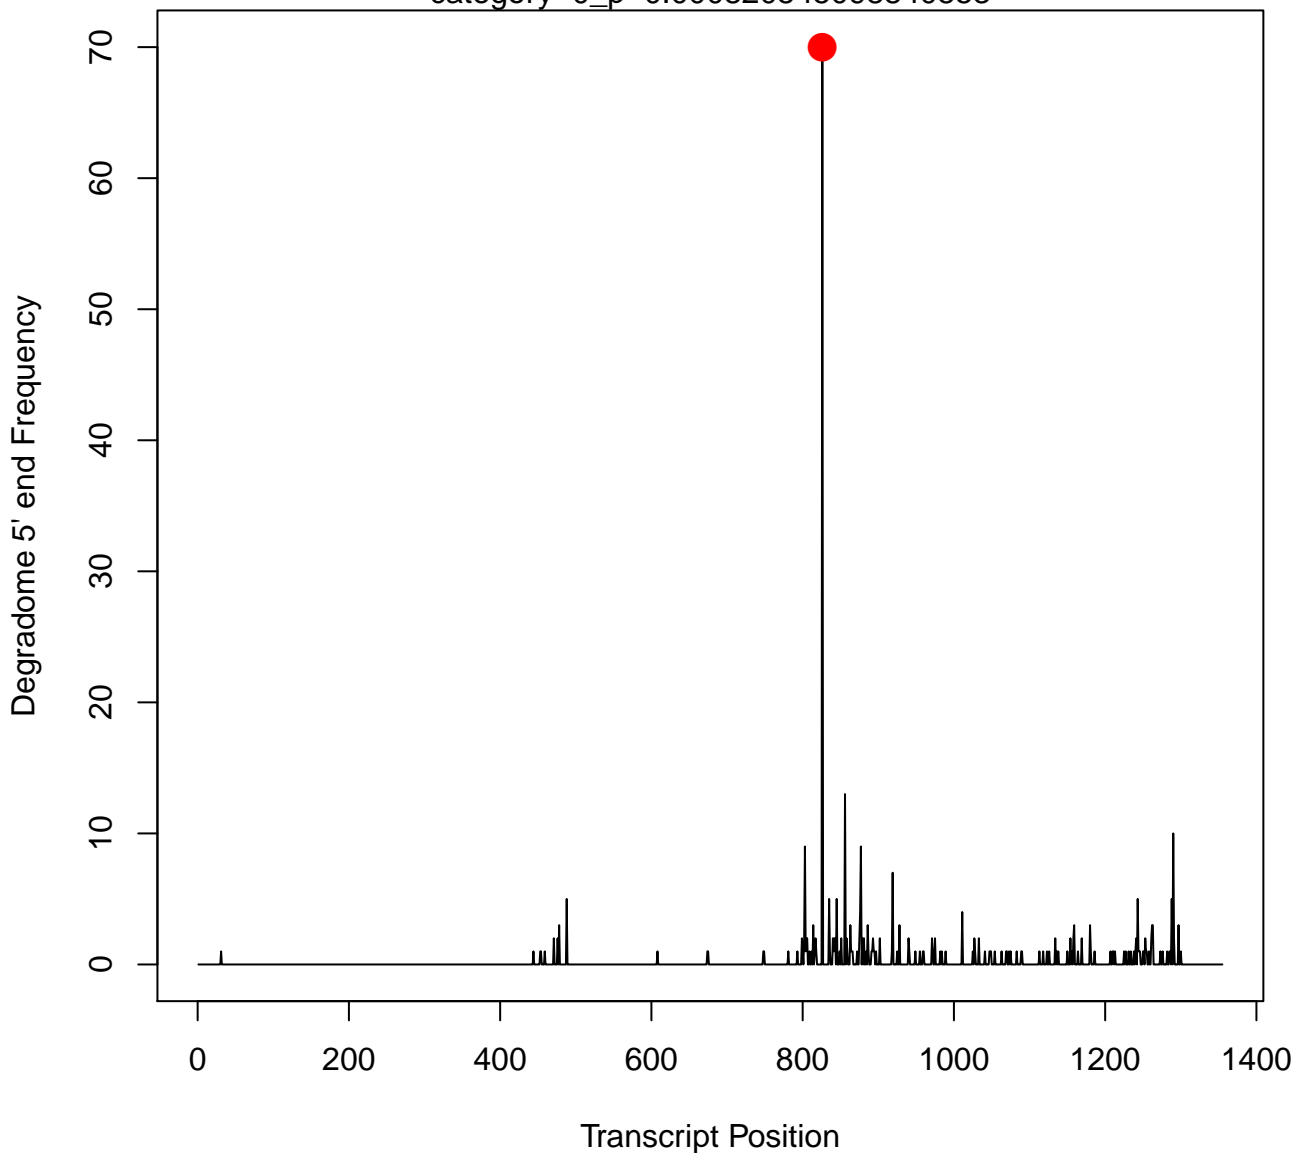

Supplement: s1 [file s1]

**T=Cluster-18410.59724\_Q=novel\_13\_S=296**

category=0\_p=0.00273253291772324

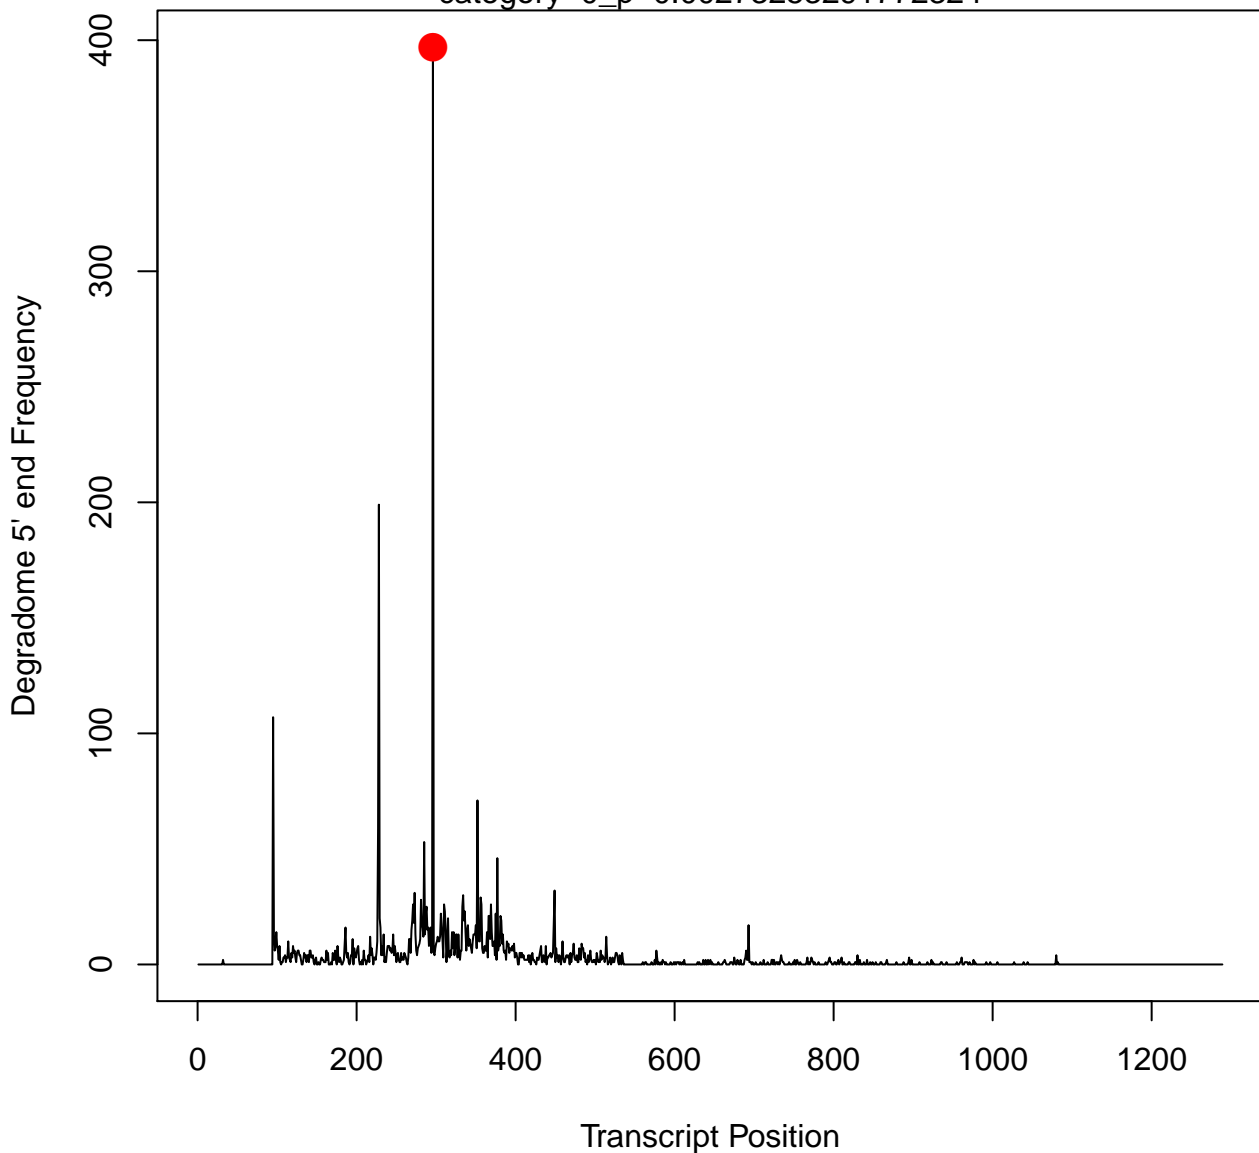

Supplement: s1 [file s1]

**T=Cluster-18410.56490\_Q=novel\_29\_S=2481**

category=0\_p=0.00491318222172366

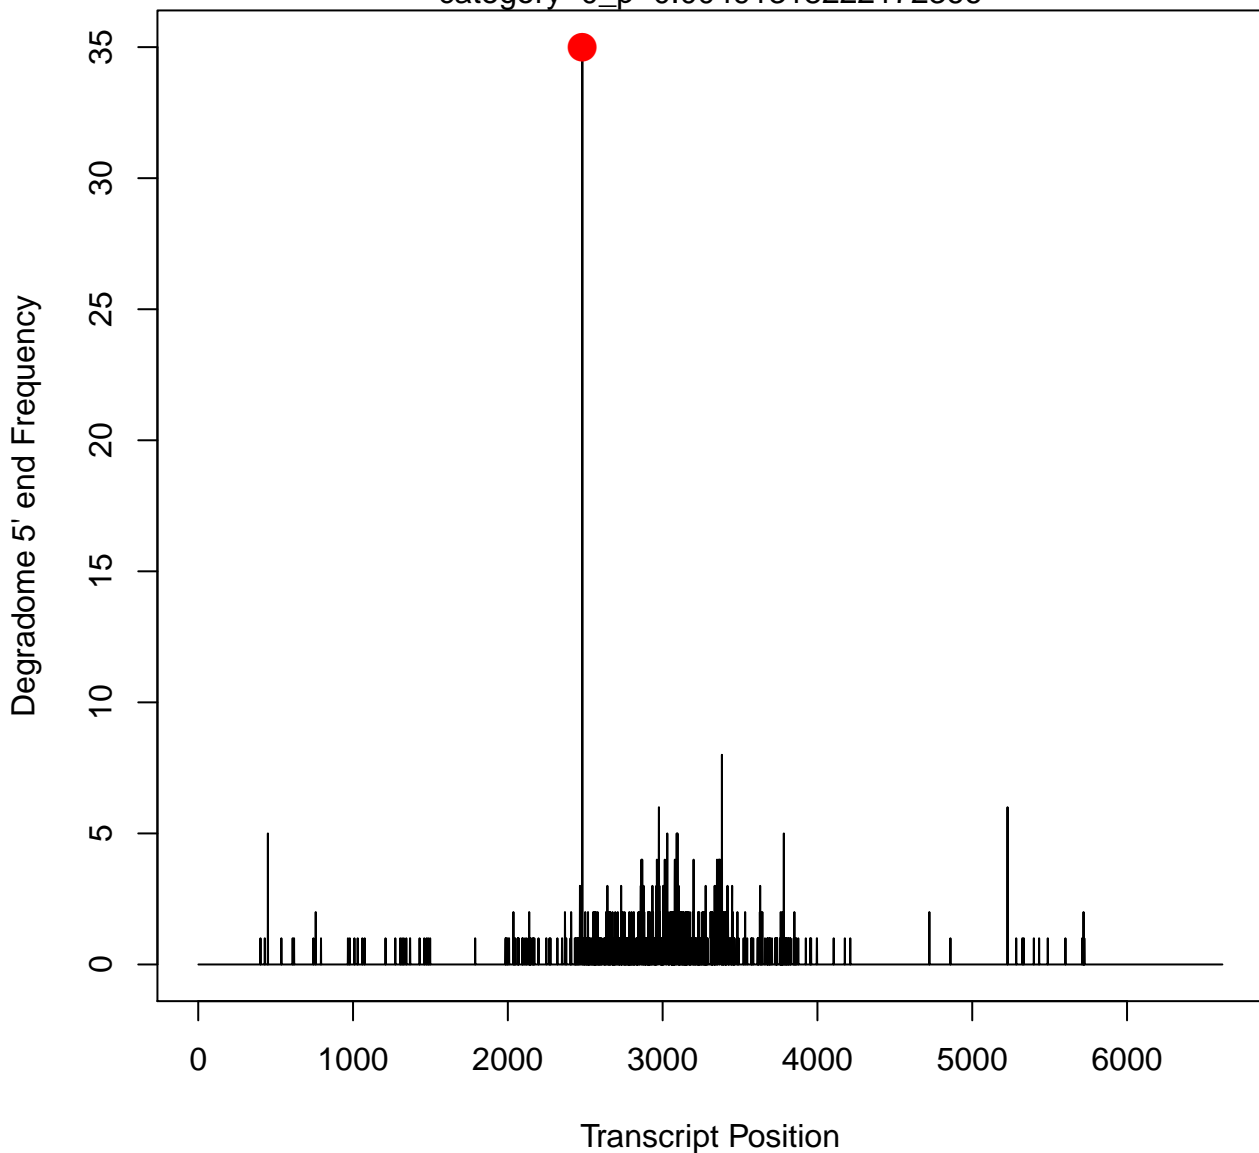

Supplement: s1 [file s1]

**T=Cluster-18410.56488\_Q=novel\_29\_S=2481**

category=0\_p=0.00436846732795781

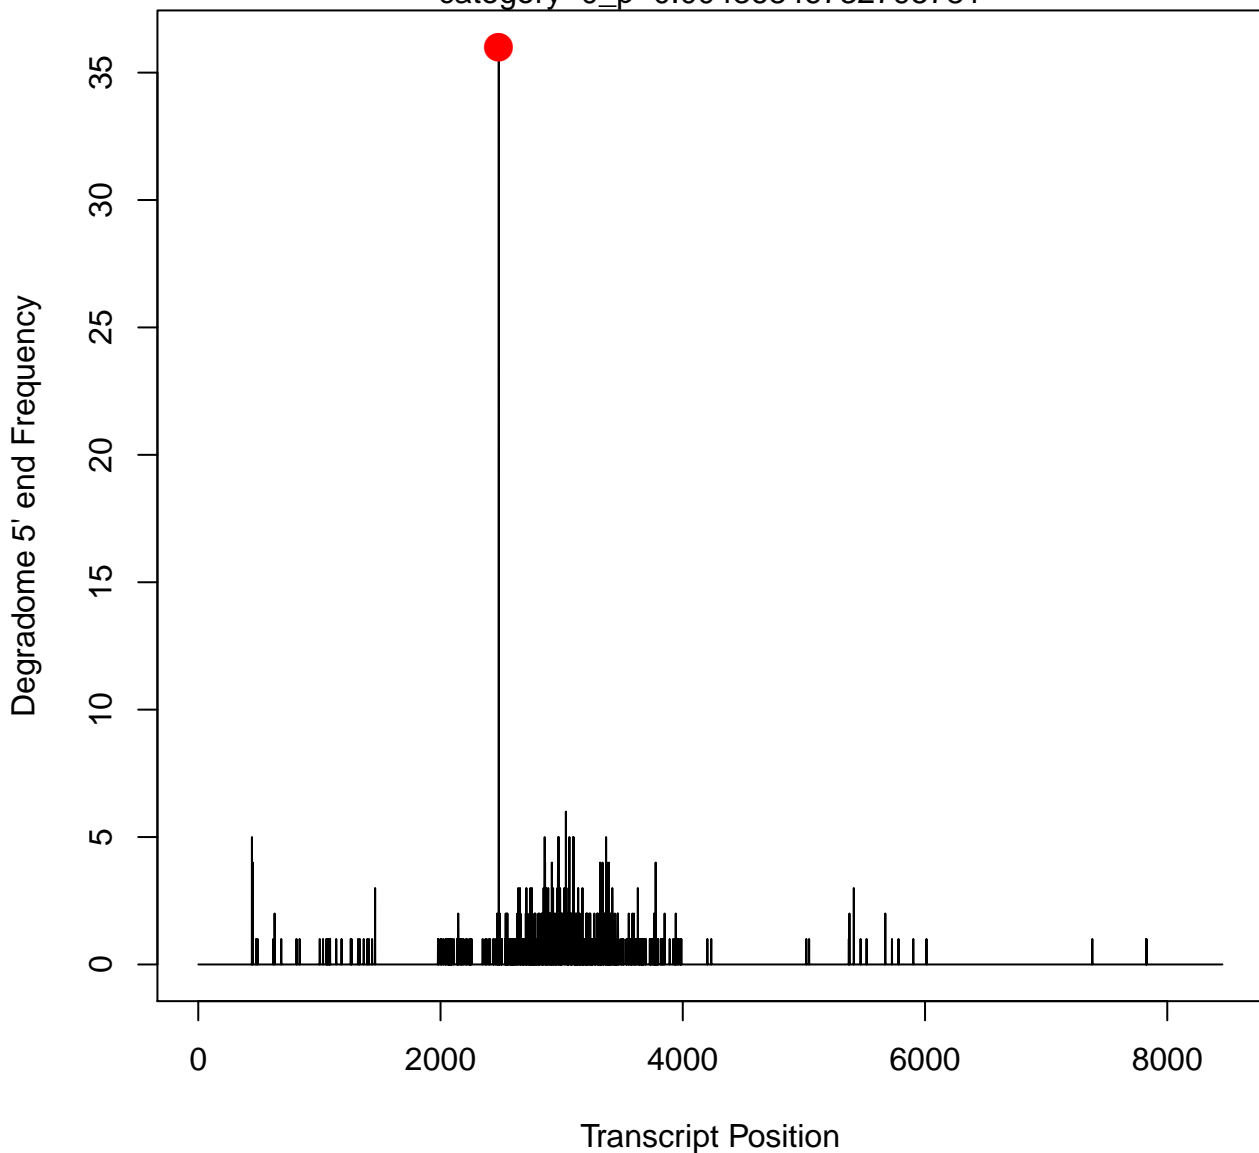

Supplement: s1 [file s1]

**T=Cluster-18410.33788\_Q=novel\_5\_S=569**

category=2\_p=0.0564267304887326

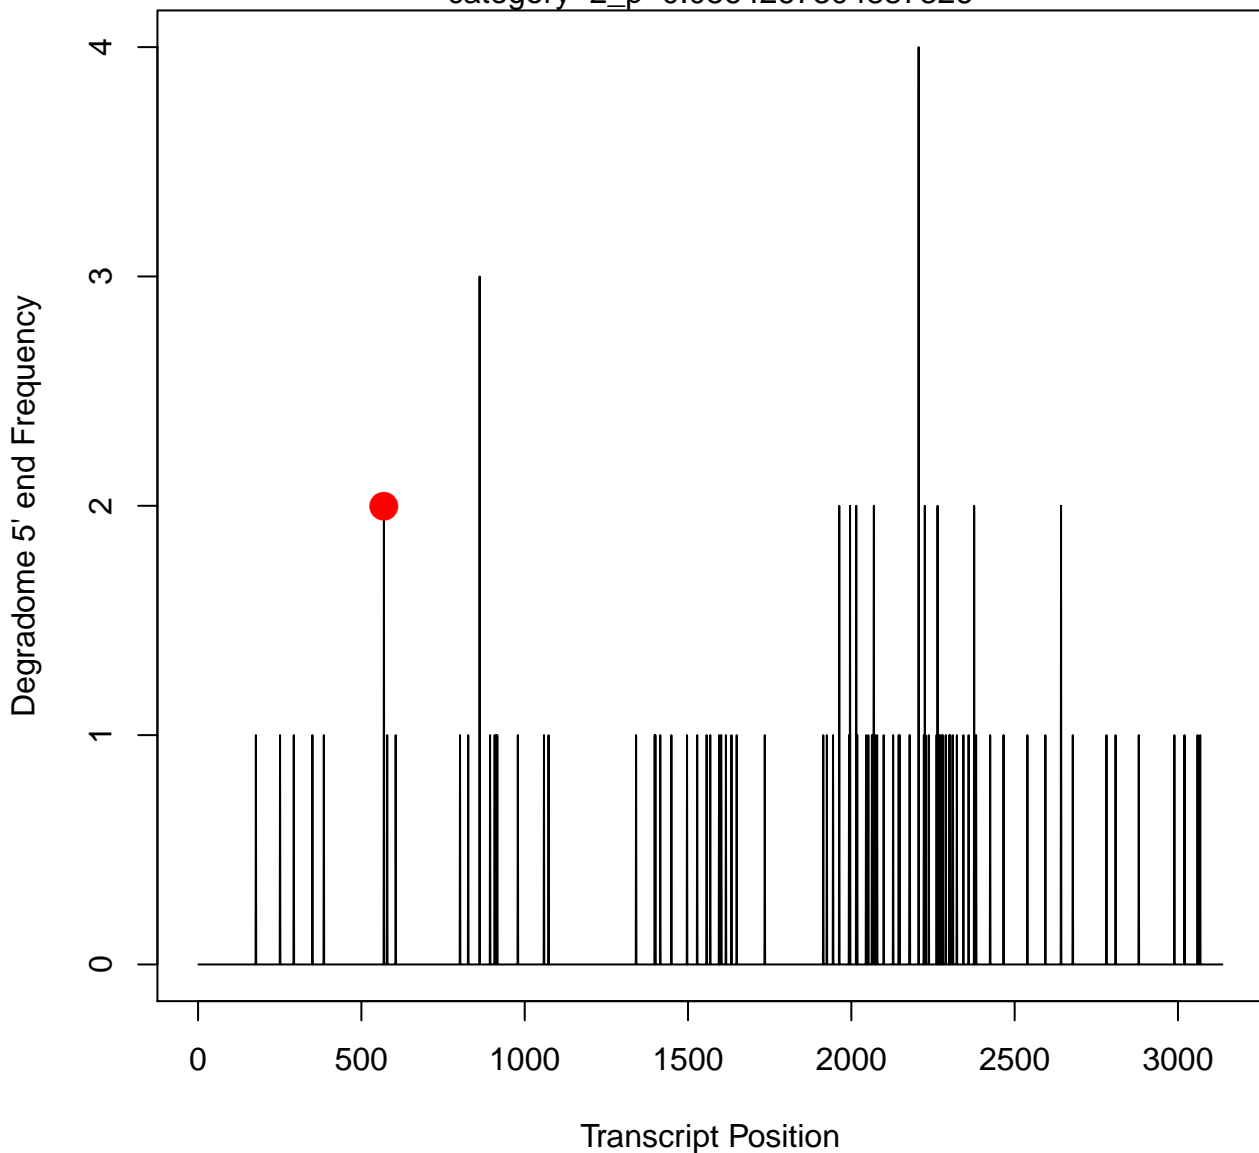

Supplement: s1 [file s1]

**T=Cluster-15837.1\_Q=pma-miR1314\_S=401**

category=0\_p=0.00109391048354923

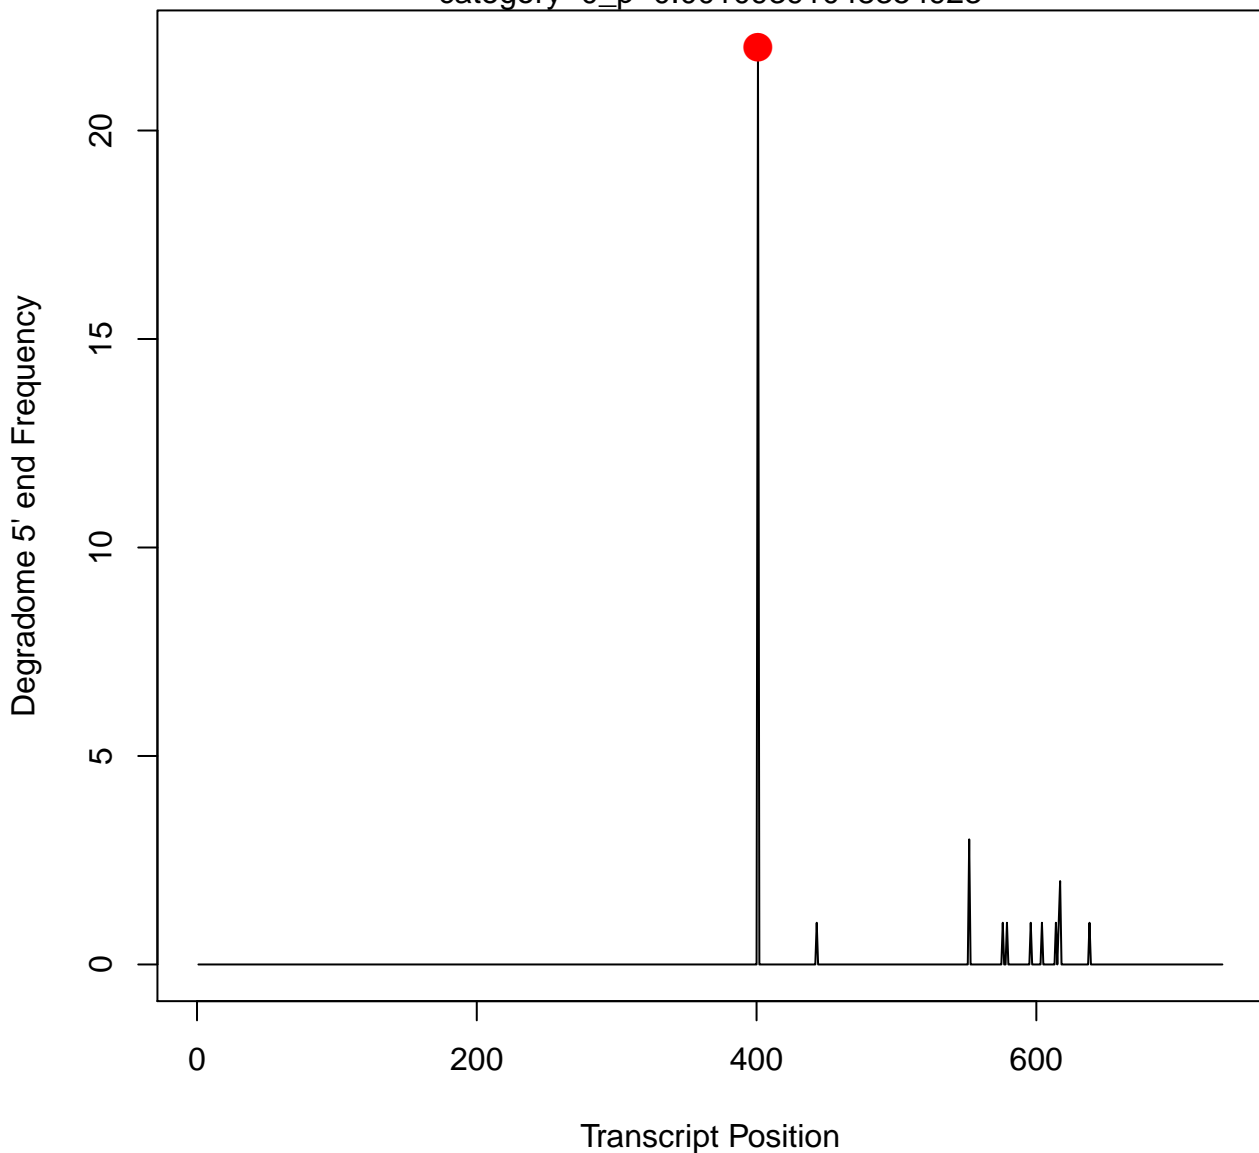

Supplement: s1 [file s1]

**T=Cluster-18410.70021\_Q=novel\_140\_S=666**

category=2\_p=0.0229647072699788

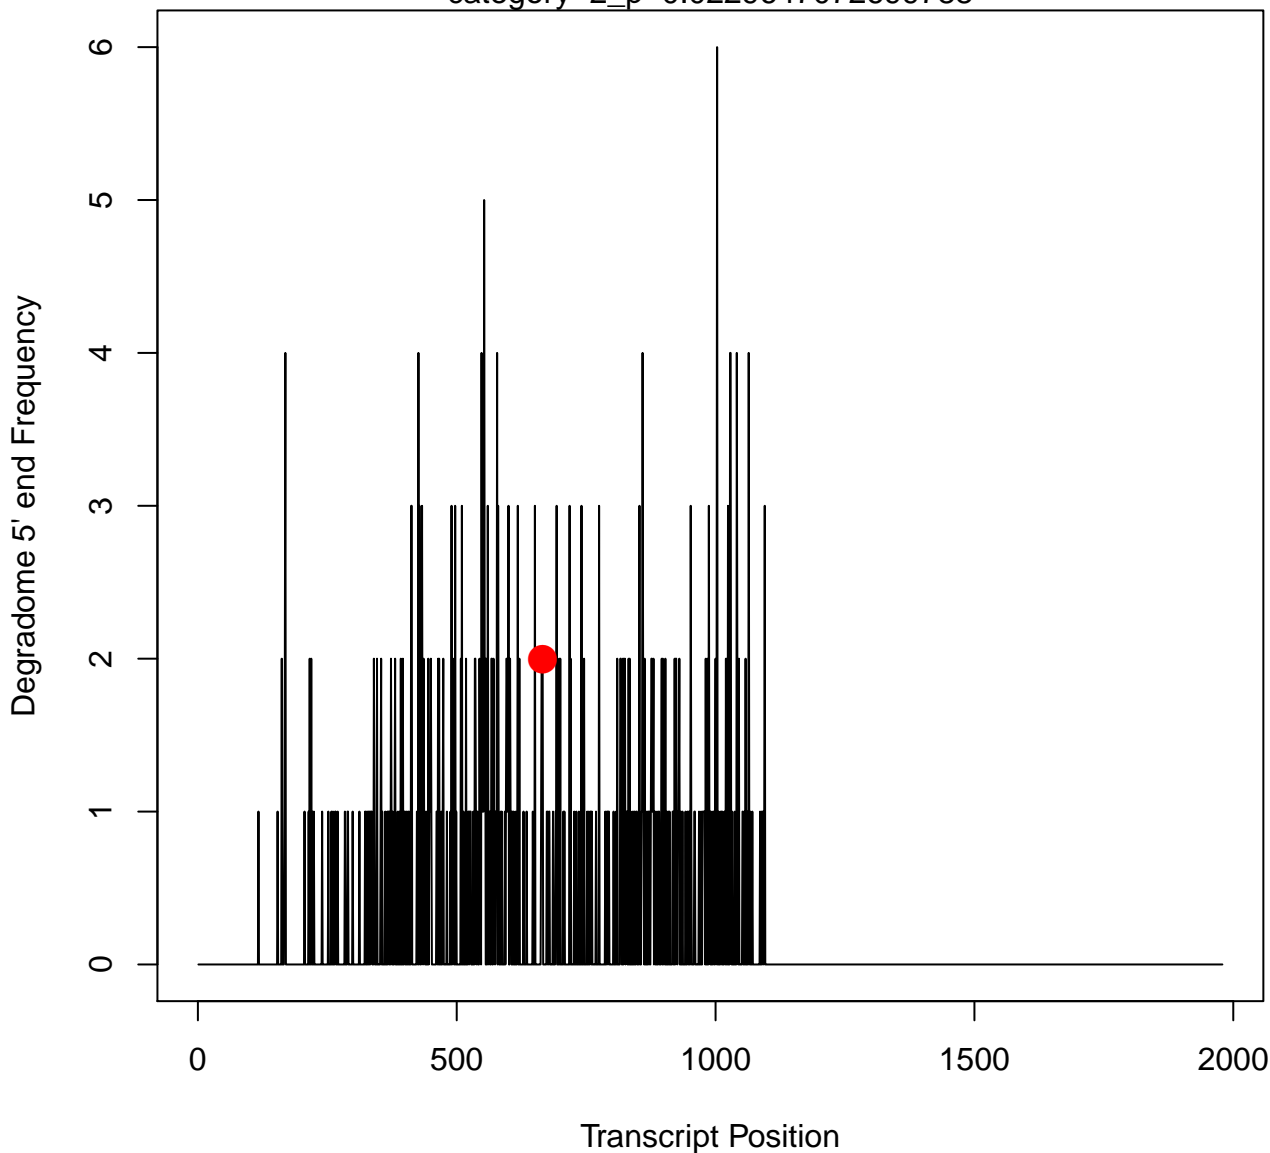

Supplement: s1 [file s1]

**T=Cluster-18410.36023\_Q=novel\_47\_S=333**

category=0\_p=0.0116970259373812

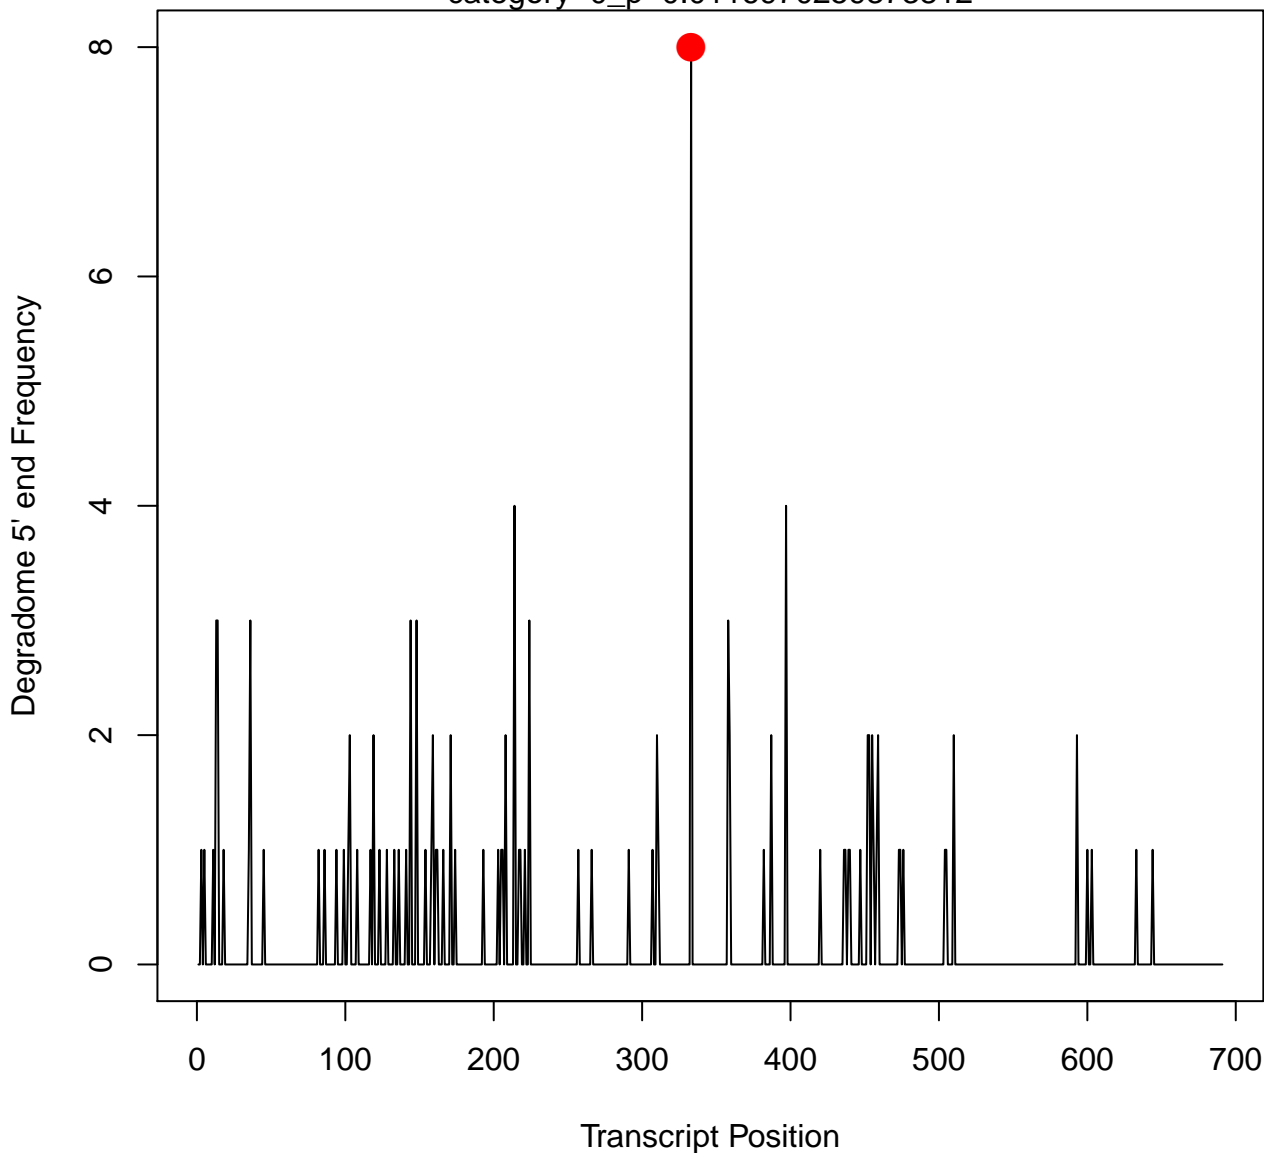

Supplement: s1 [file s1]

**T=Cluster-18410.18757\_Q=novel\_88\_S=270**

category=3\_p=0.0681306920296354

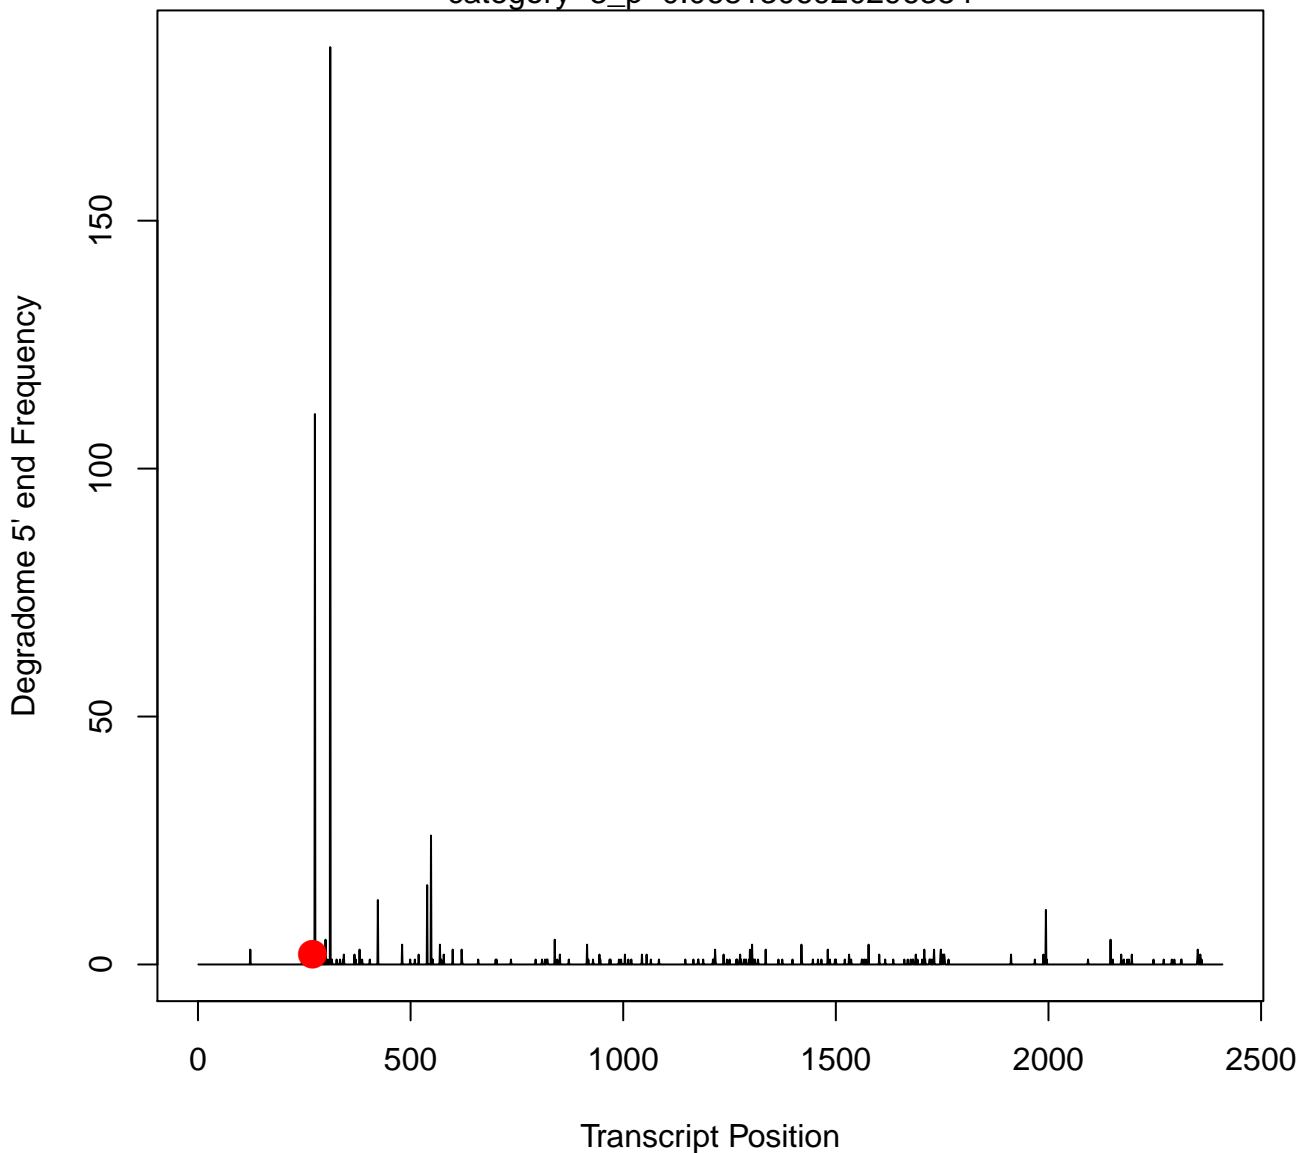

Supplement: s1 [file s1]

**T=Cluster-17867.2\_Q=novel\_47\_S=1111**

category=0\_p=0.00027358987754178

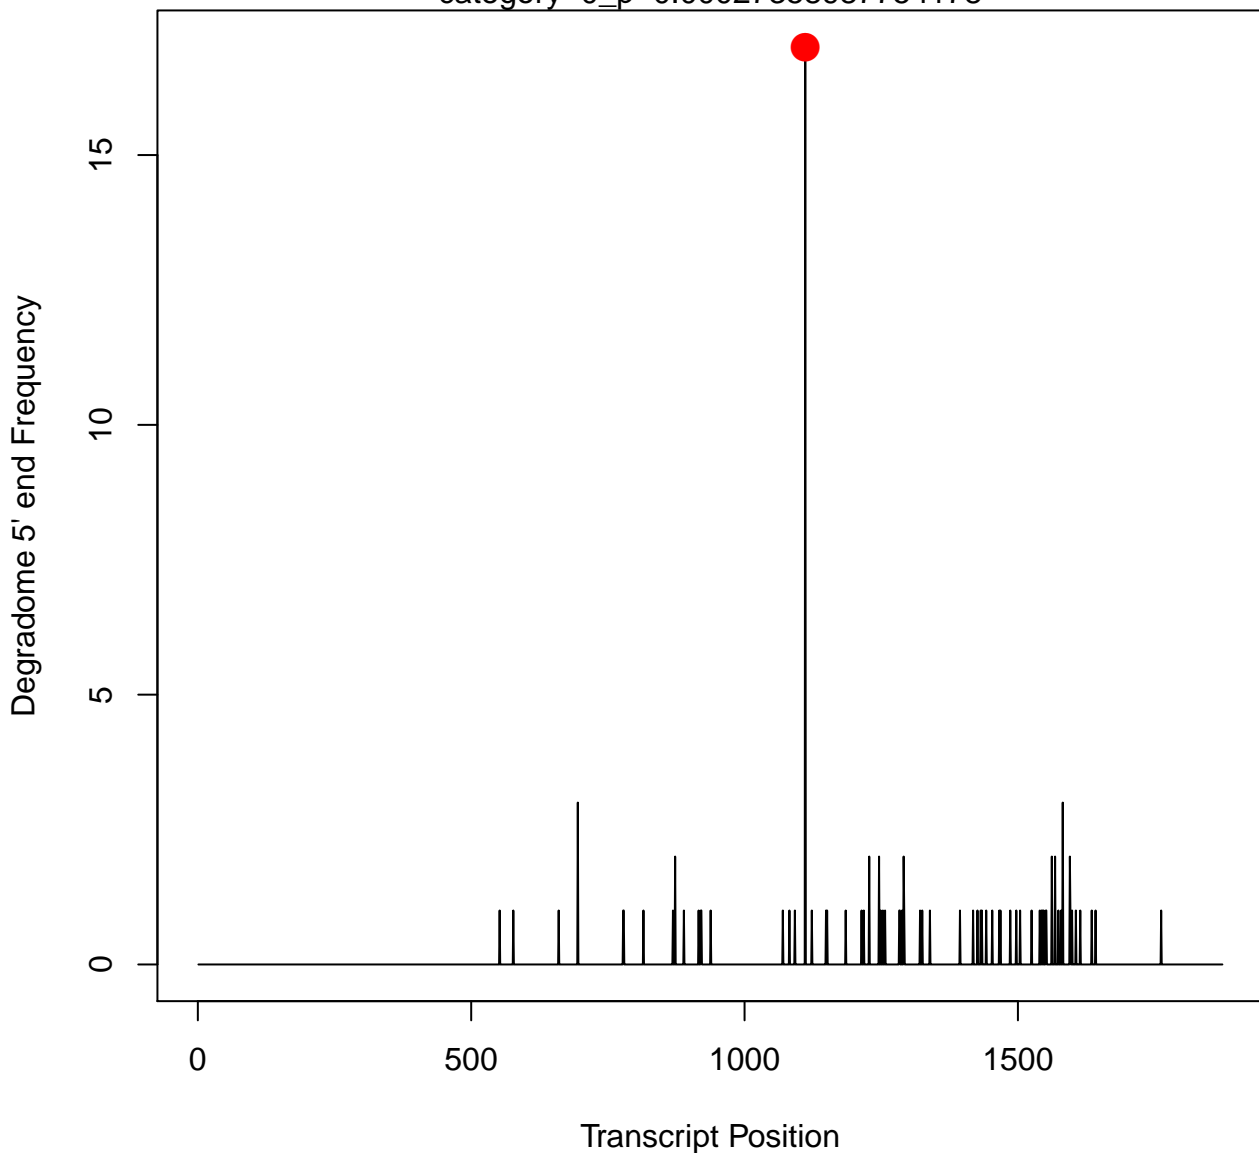

Supplement: s1 [file s1]

**T=Cluster-18410.25807\_Q=novel\_197\_S=289**

category=0\_p=0.0040959980740275

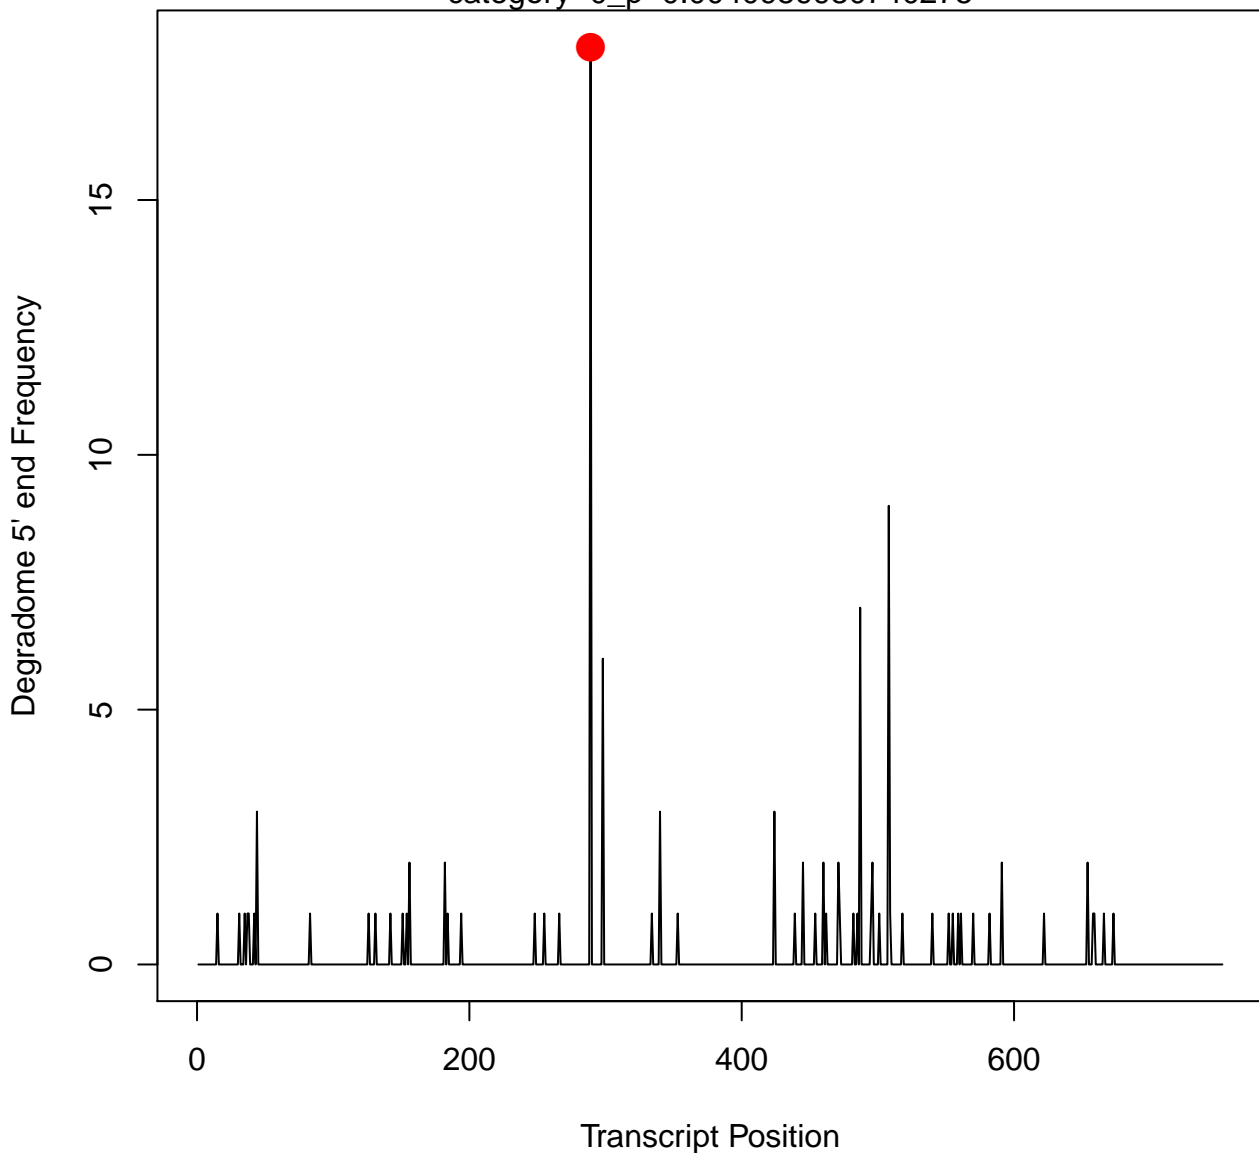

Supplement: s1 [file s1]

**T=Cluster-323.0\_Q=pma-miR947\_S=57**

category=0\_p=0.00136720107825572

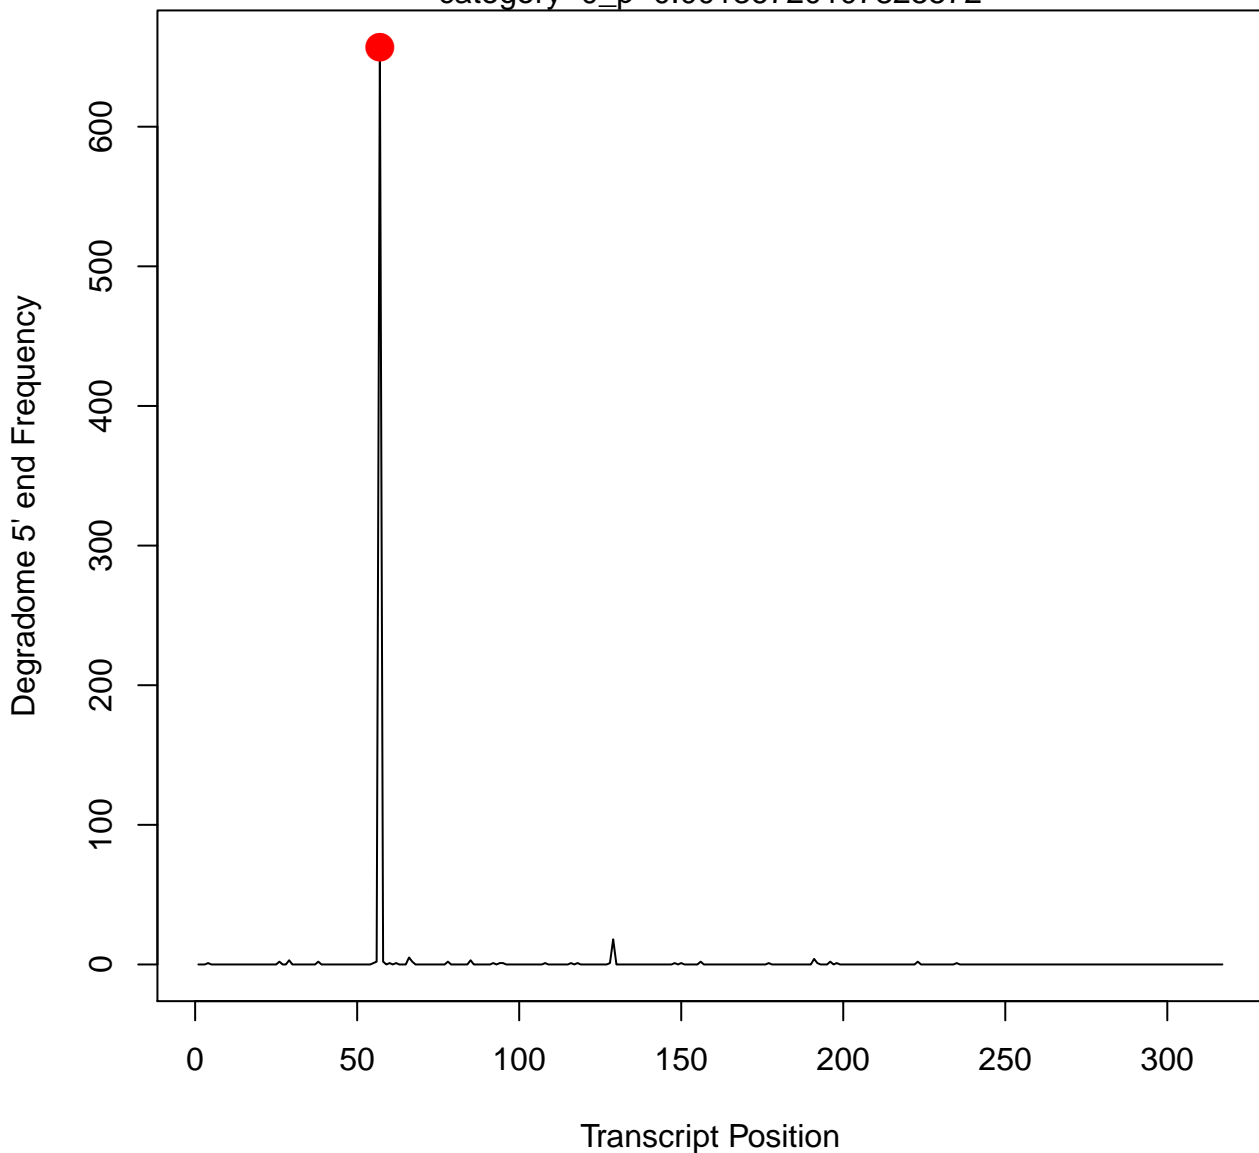

Supplement: s1 [file s1]

**T=Cluster-18410.56603\_Q=novel\_113\_S=1398**

category=1\_p=0.00466841754950487

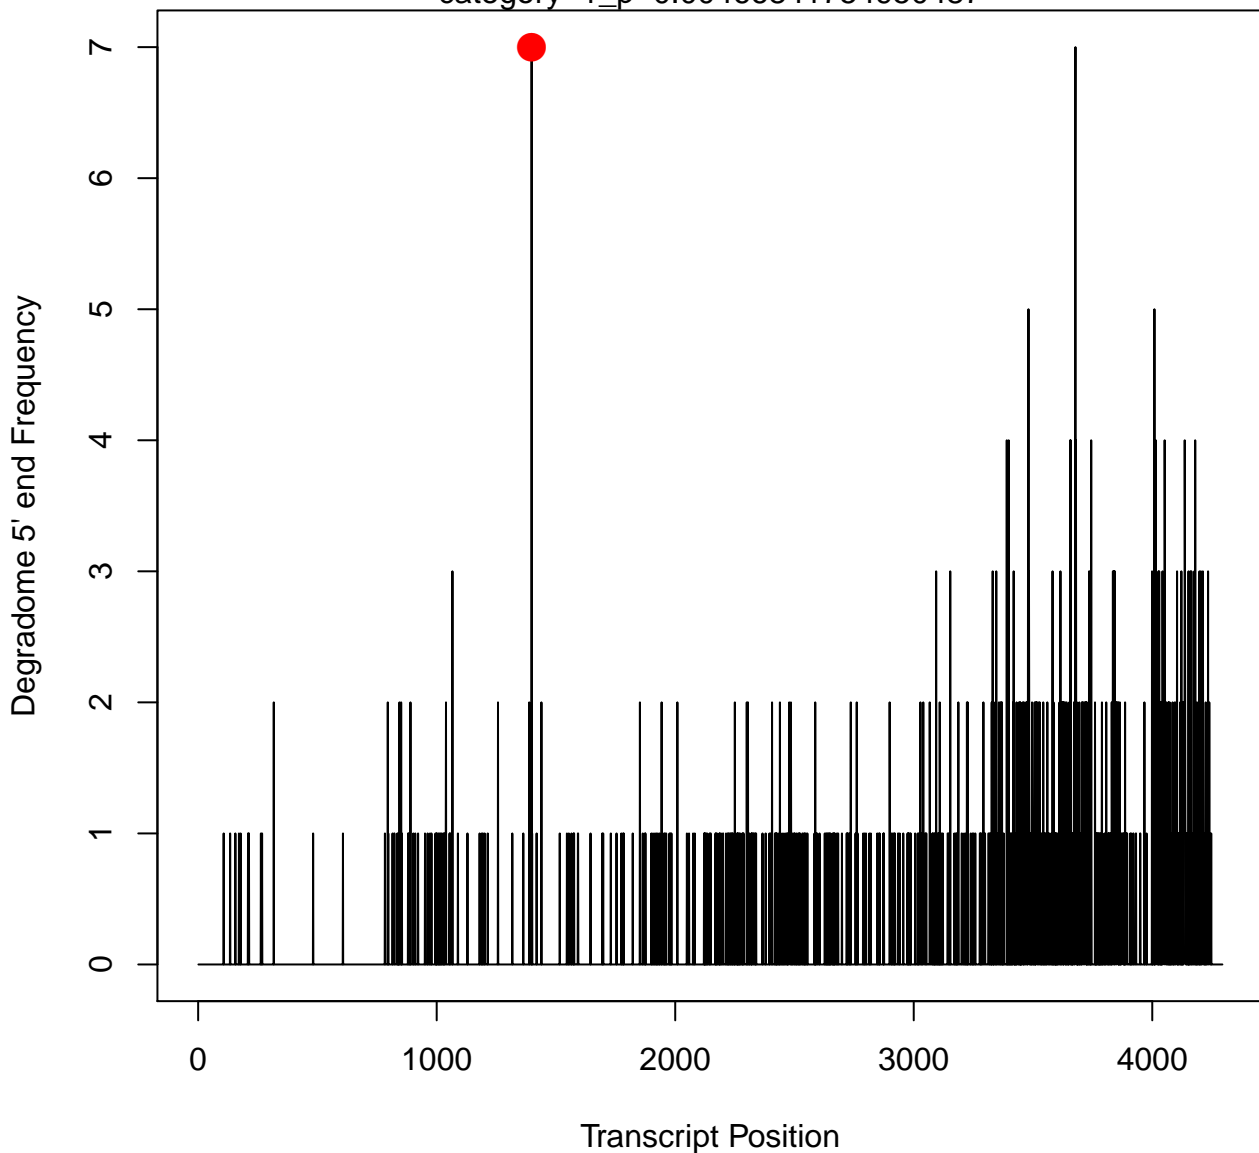

Supplement: s1 [file s1]

**T=Cluster-18410.60878\_Q=novel\_183\_S=664**

category=0\_p=0.00600171812373296

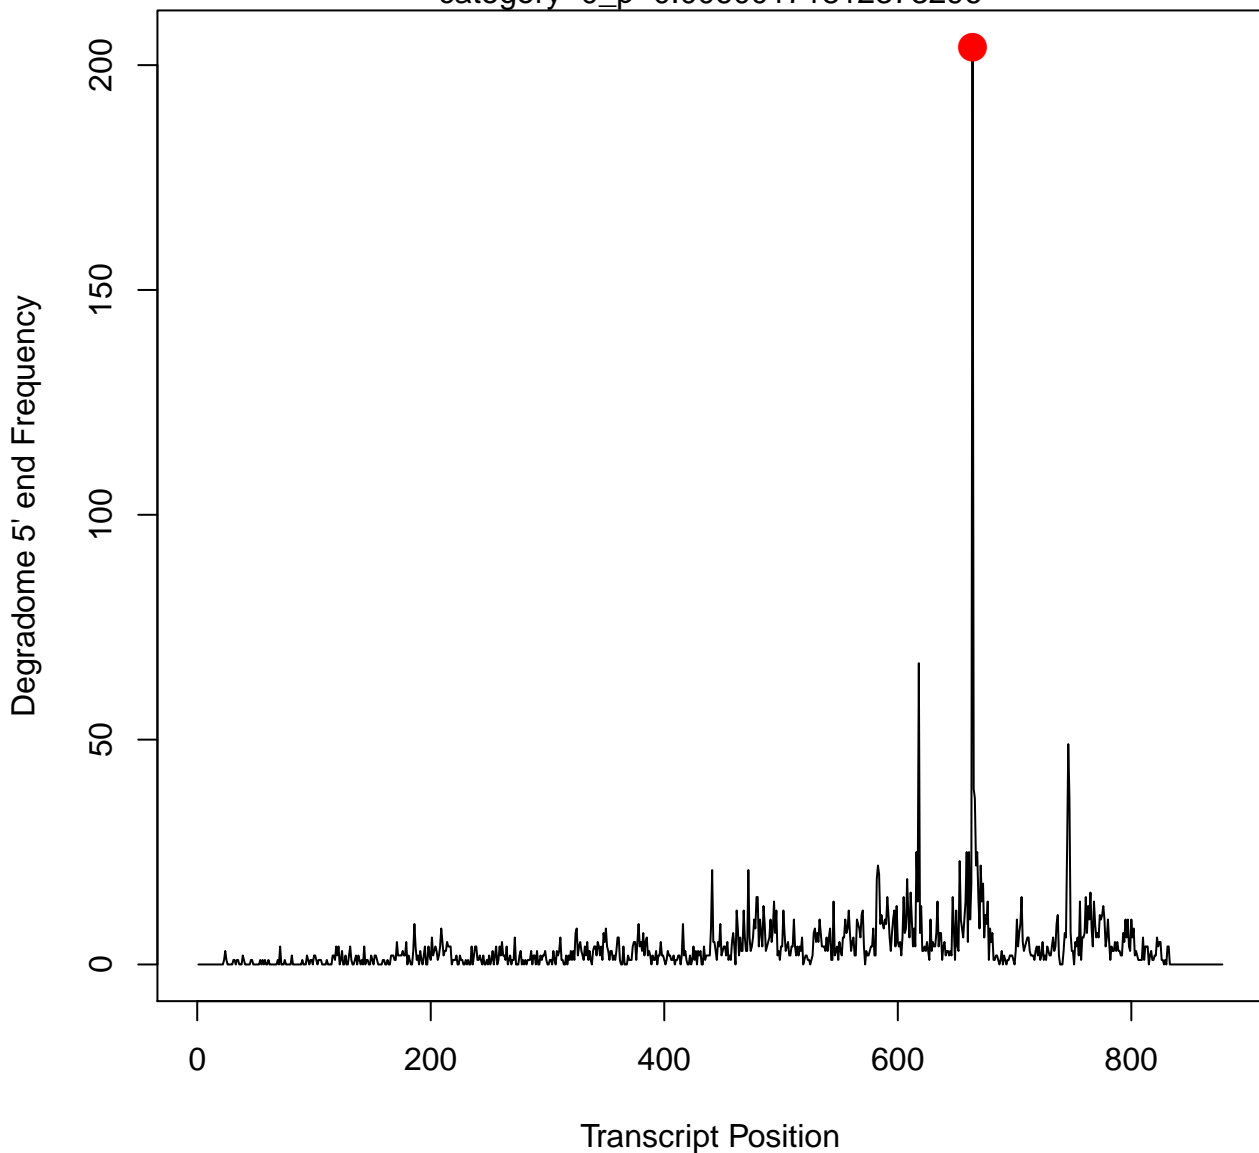

Supplement: s1 [file s1]

**T=Cluster-18410.73417\_Q=novel\_92\_S=1751**

category=0\_p=0.0040959980740275

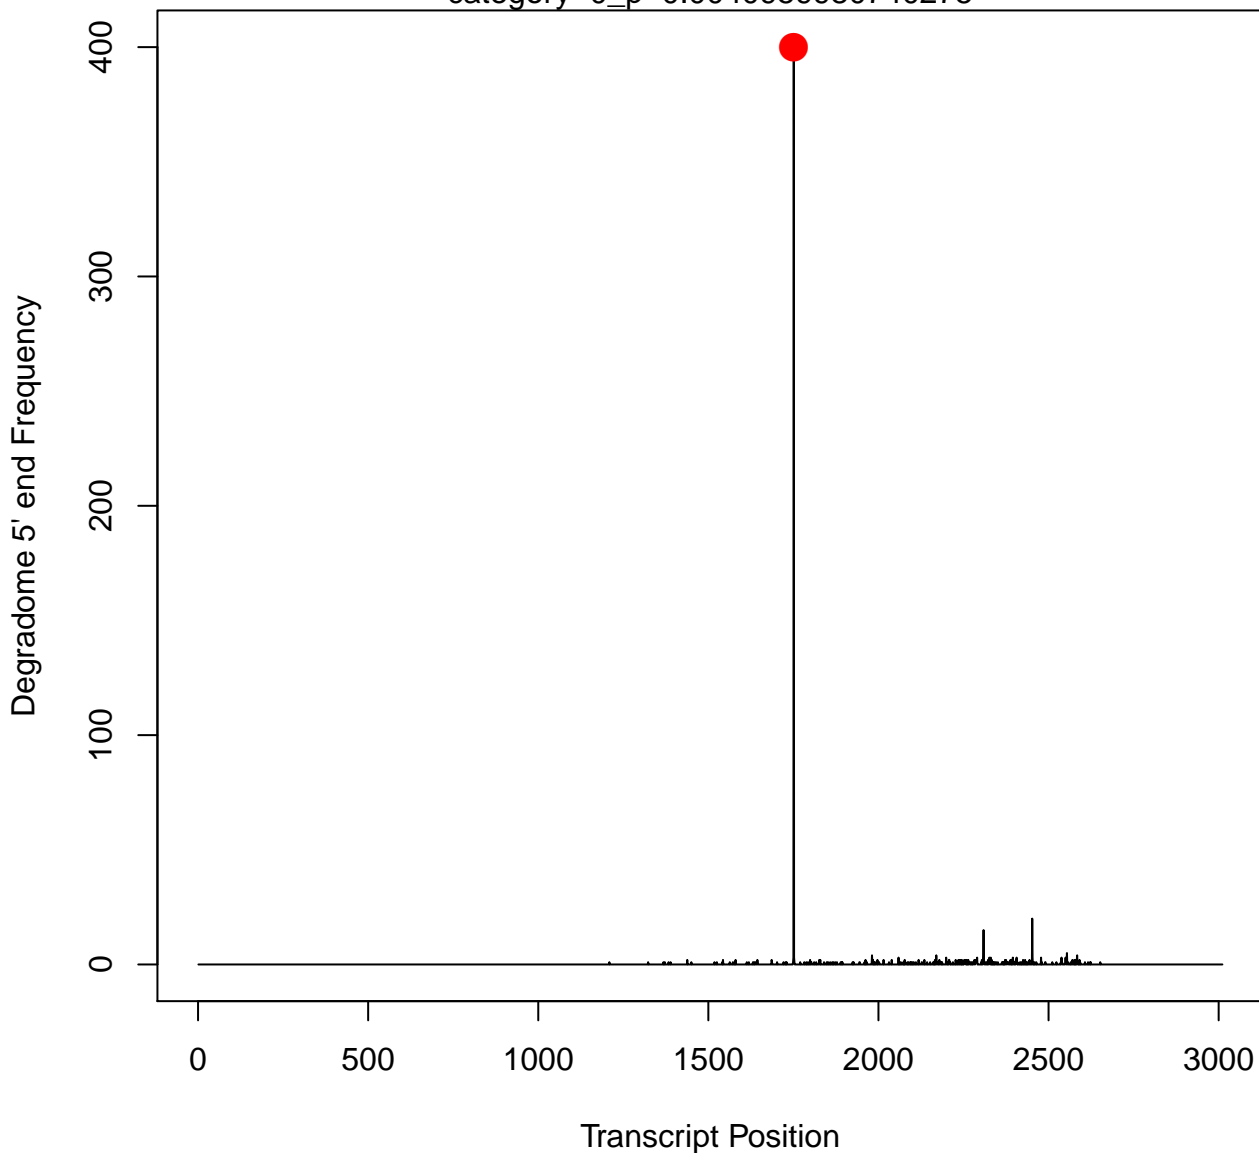

Supplement: s1 [file s1]

**T=Cluster-18410.79383\_Q=novel\_82\_S=162**

category=0\_p=0.0146672471876115

Degradsome 5' end Frequency

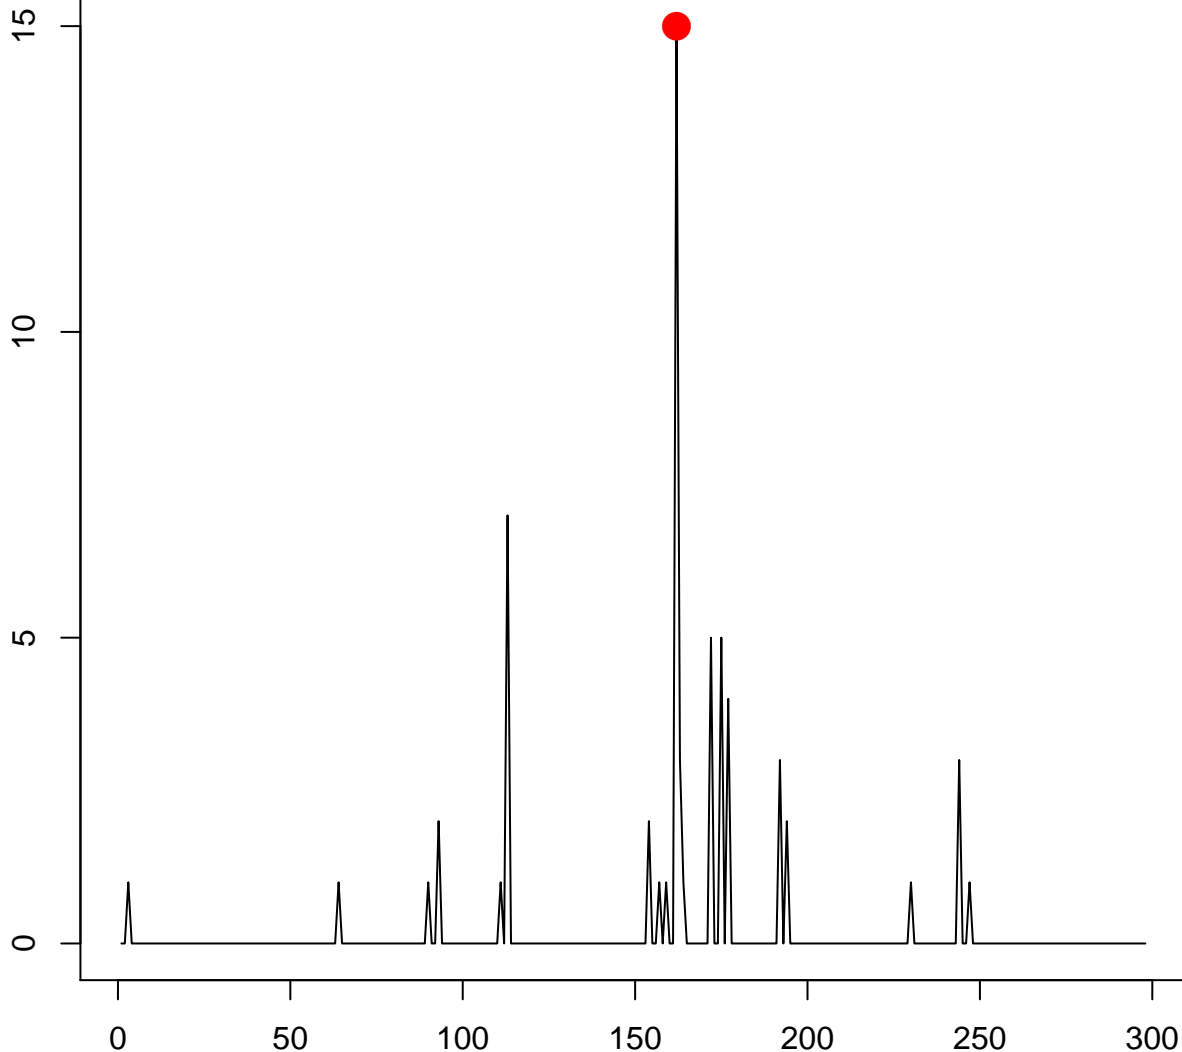

Transcript Position

Supplement: s1 [file s1]

**T=Cluster-18410.84092\_Q=novel\_74\_S=726**

category=0\_p=0.0157451130156974

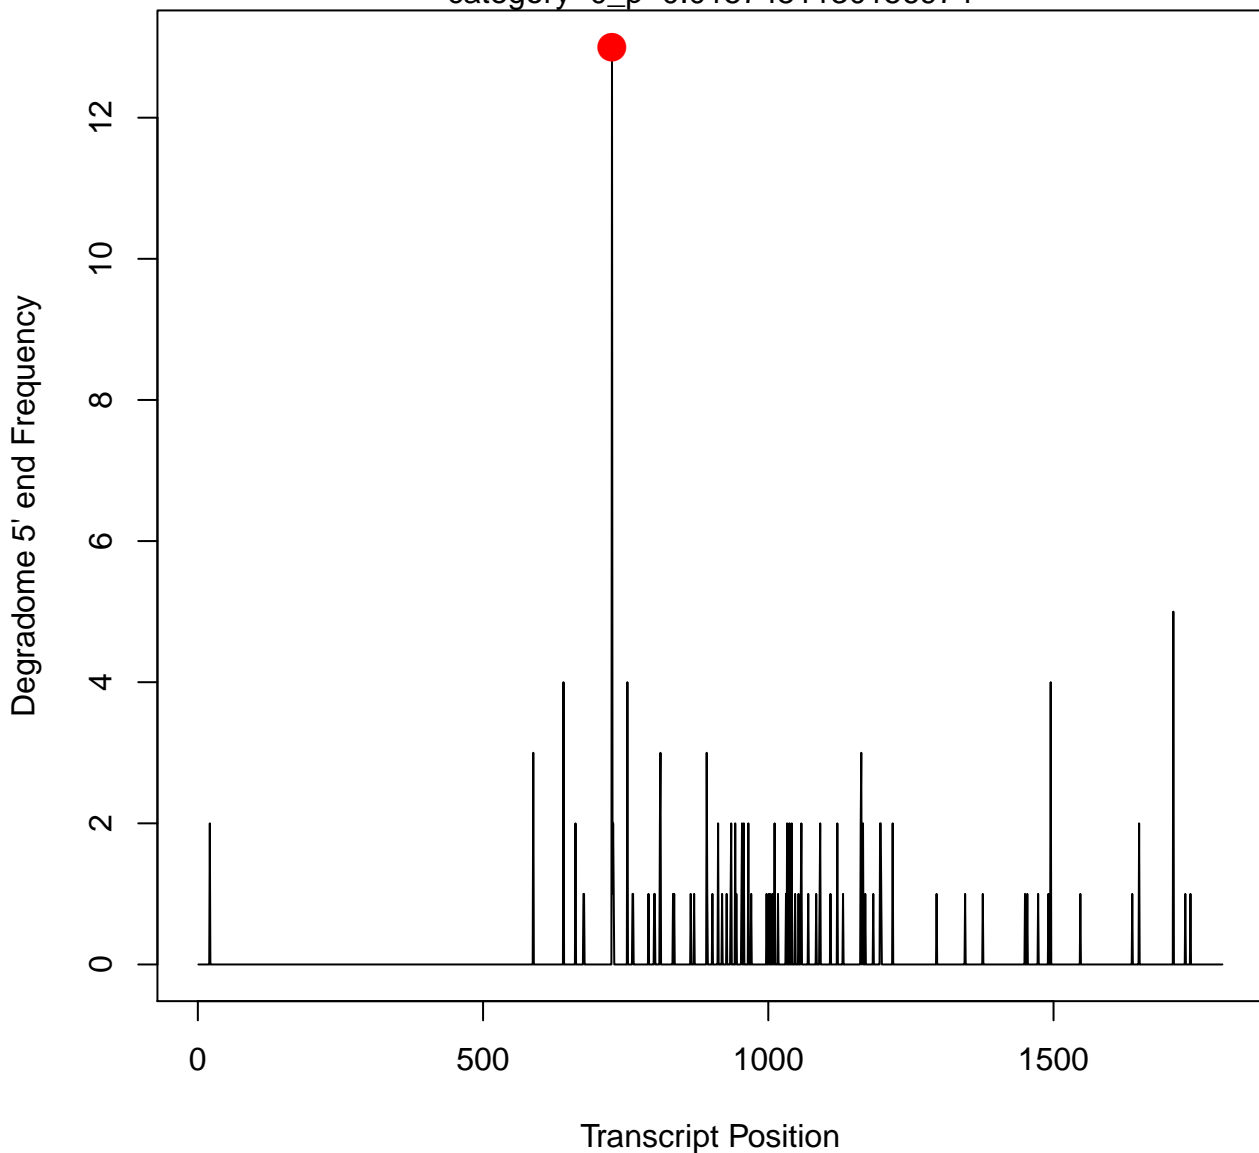

Supplement: s1 [file s1]

**T=Cluster-18624.2\_Q=novel\_80\_S=402**

category=0\_p=0.0243257006132207

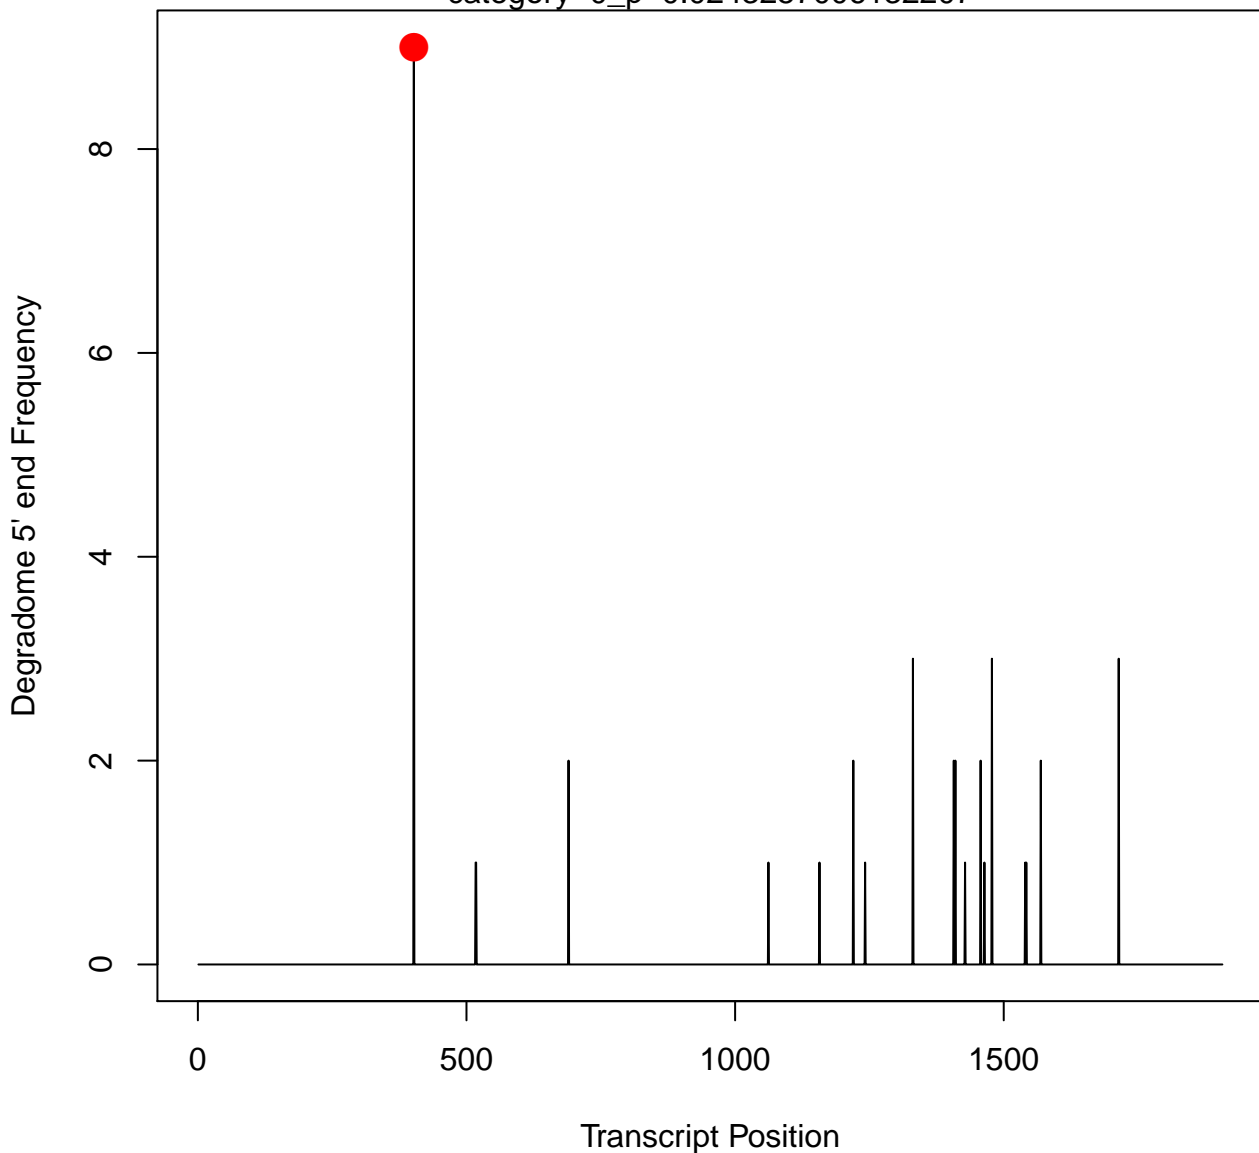

Supplement: s1 [file s1]

**T=Cluster-18410.86993\_Q=novel\_83\_S=38**

category=1\_p=0.0546047488382562

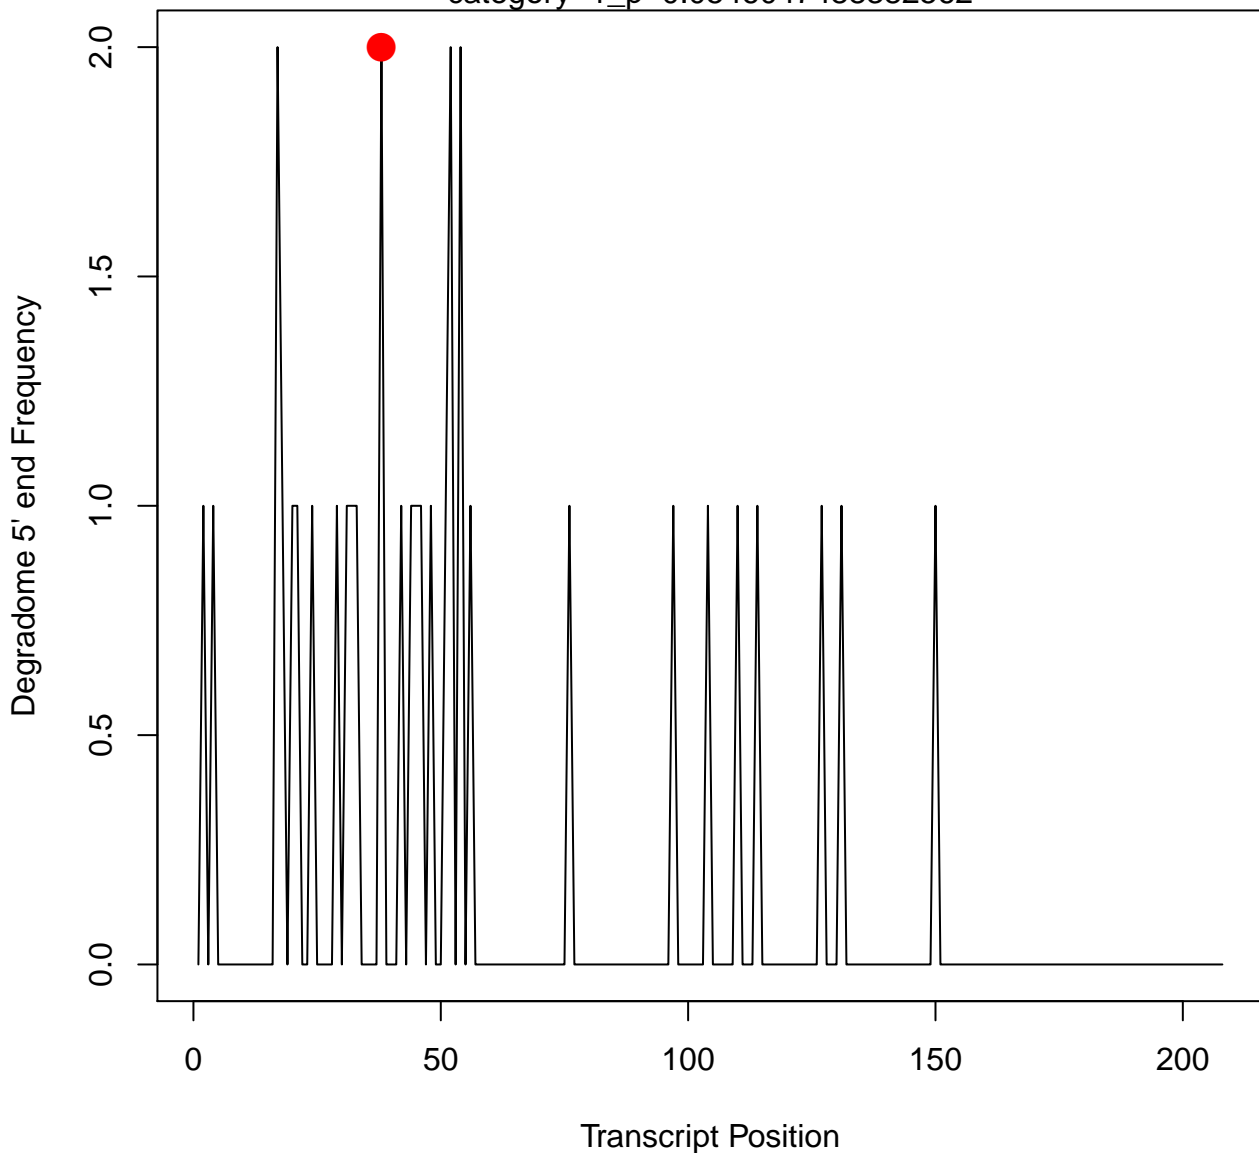

Supplement: s1 [file s1]

**T=Cluster-18410.32068\_Q=novel\_6\_S=242**

category=2\_p=0.0992668787568005

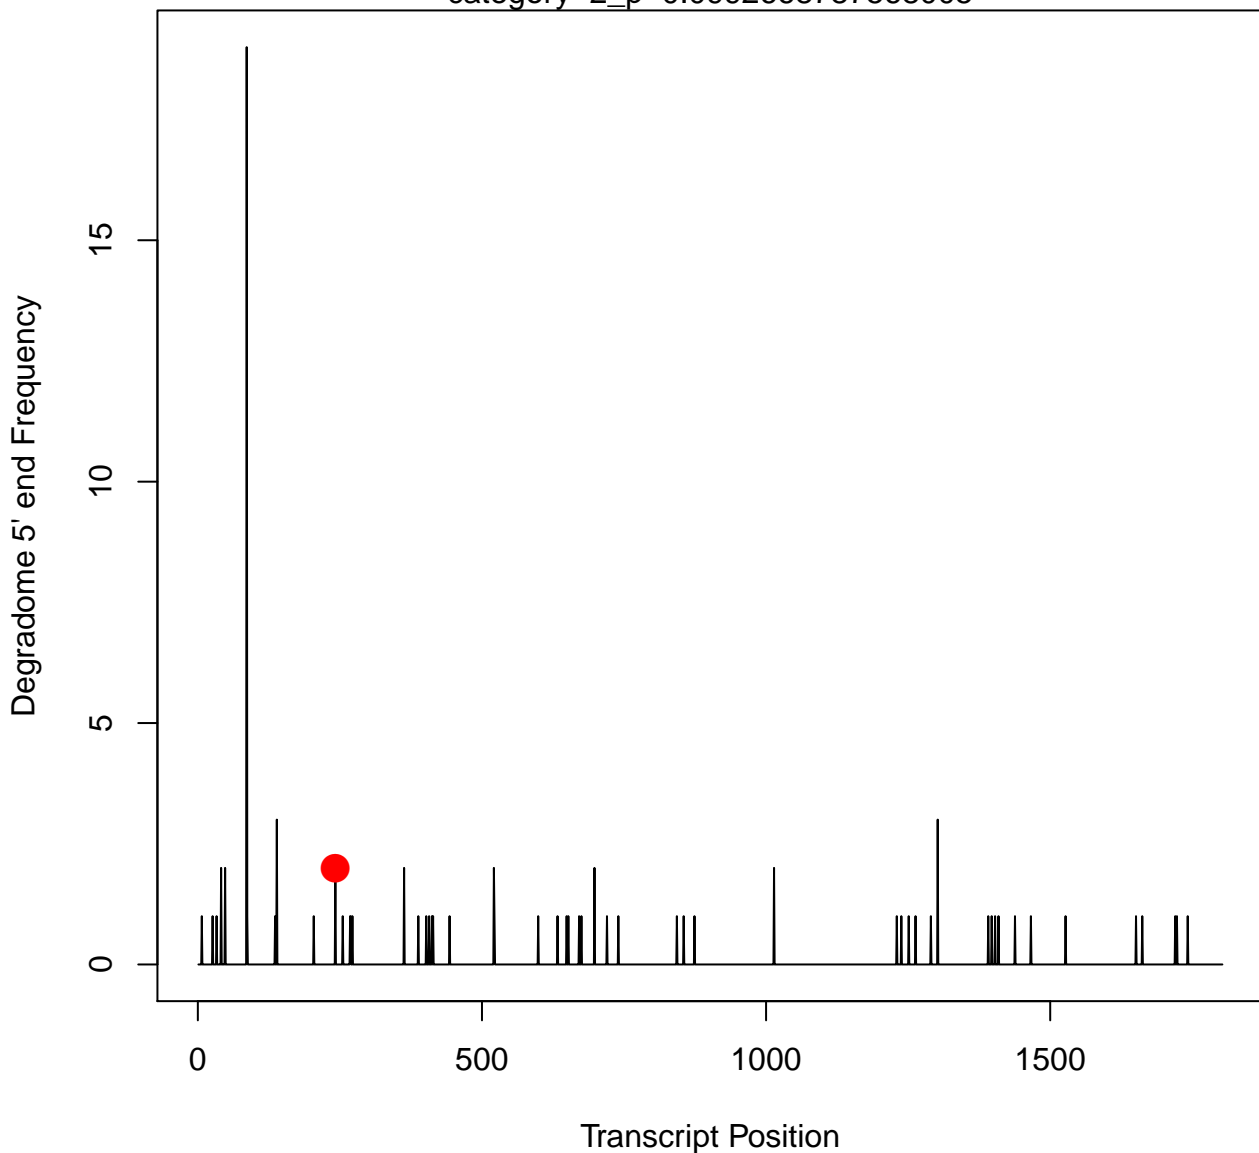

Supplement: s1 [file s1]

**T=Cluster-18410.12262\_Q=pma-miR1311\_S=318**

category=3\_p=0.093081058041071

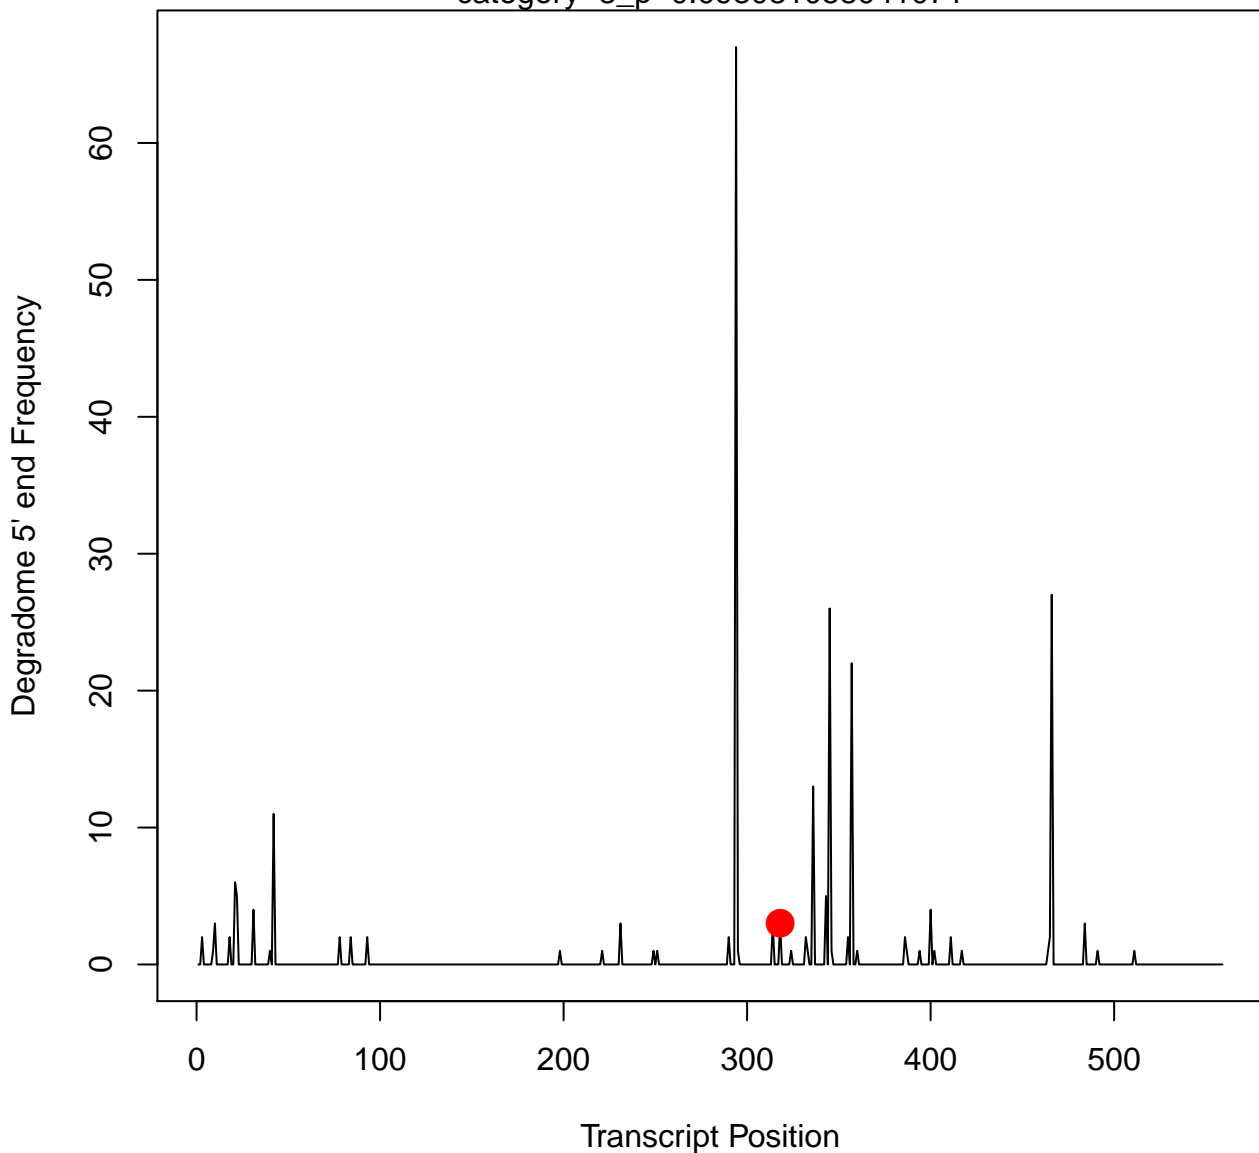

Supplement: s1 [file s1]

**T=Cluster-18410.69756\_Q=novel\_42\_S=1236**

category=0\_p=0.00245961596621247

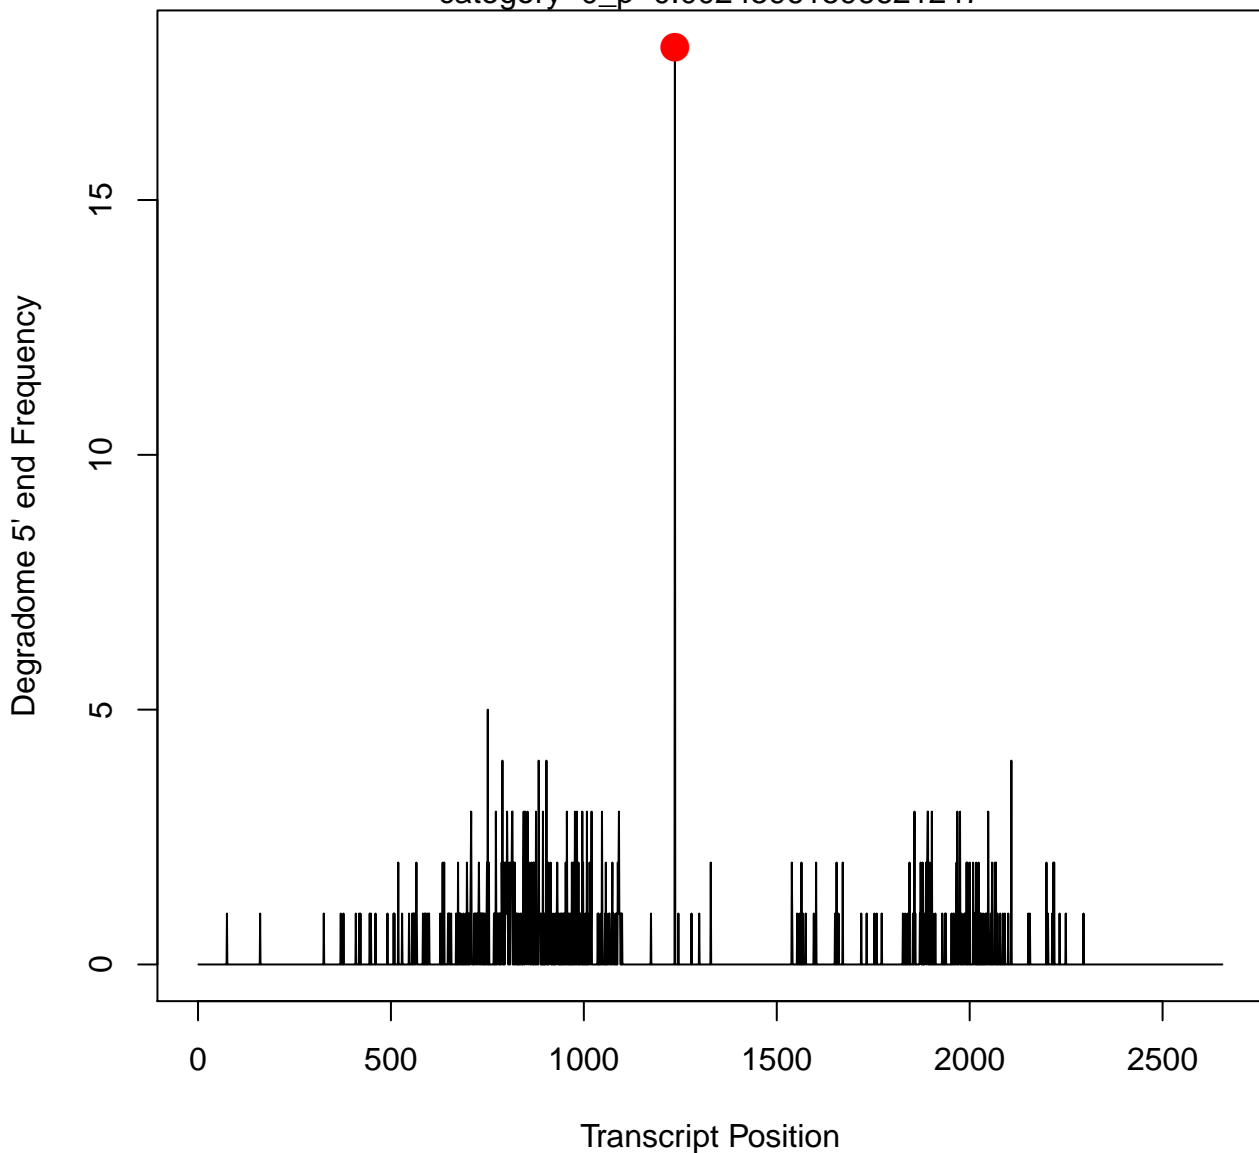

Supplement: s1 [file s1]

**T=Cluster-18410.51201\_Q=novel\_174\_S=27**

category=0\_p=0.0602236893102497

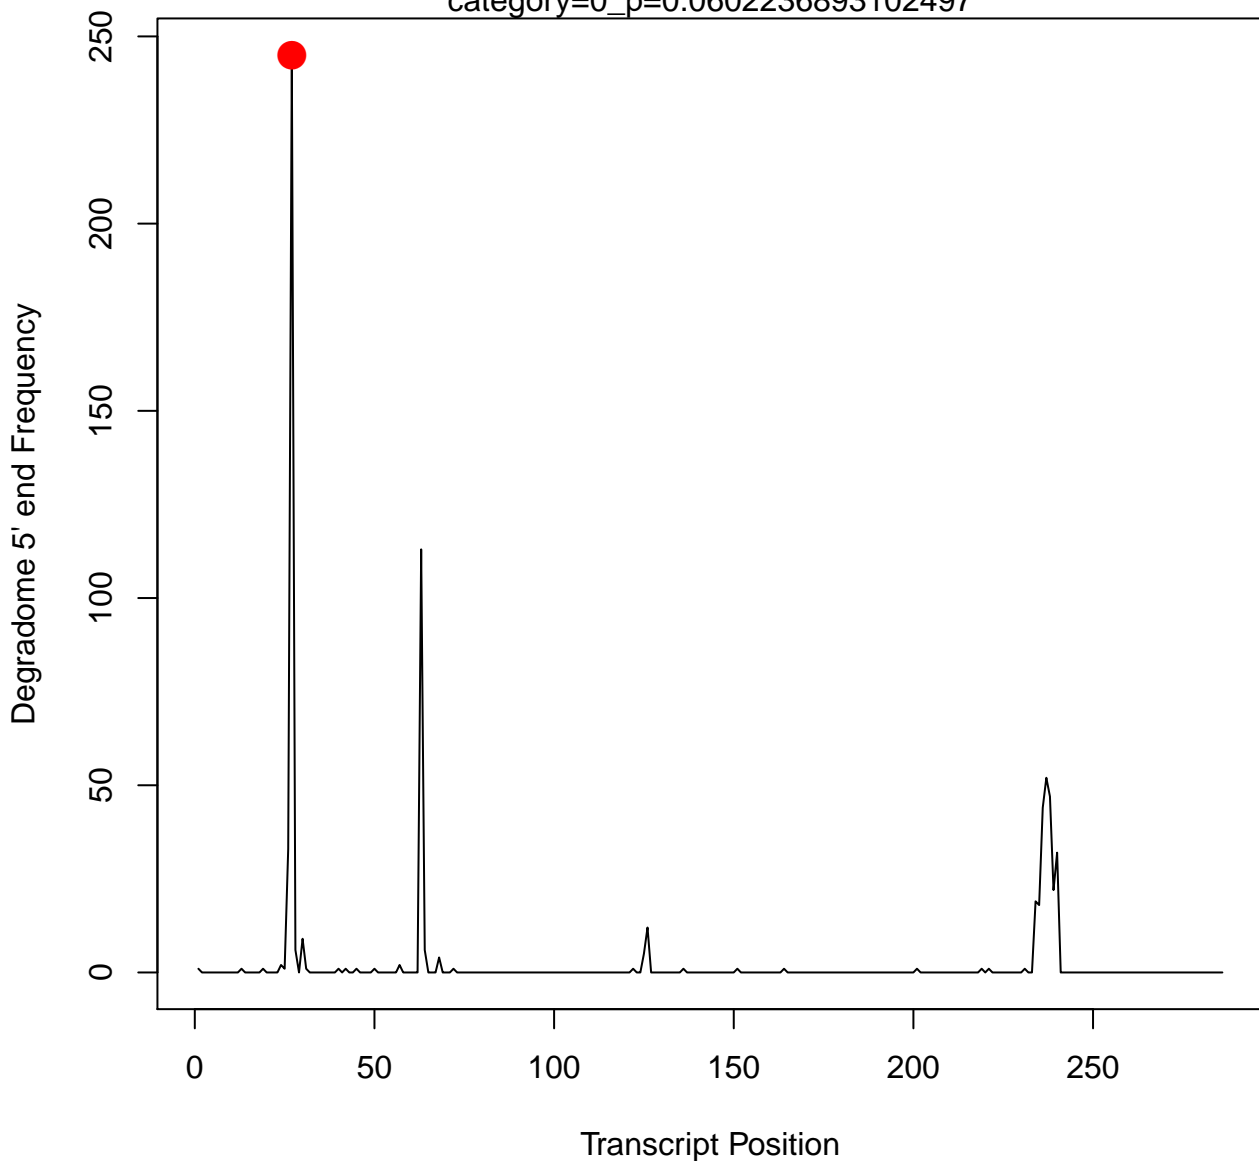

Supplement: s1 [file s1]

**T=Cluster-18410.35926\_Q=pma-miR951\_S=430**

category=0\_p=0.00136720107825572

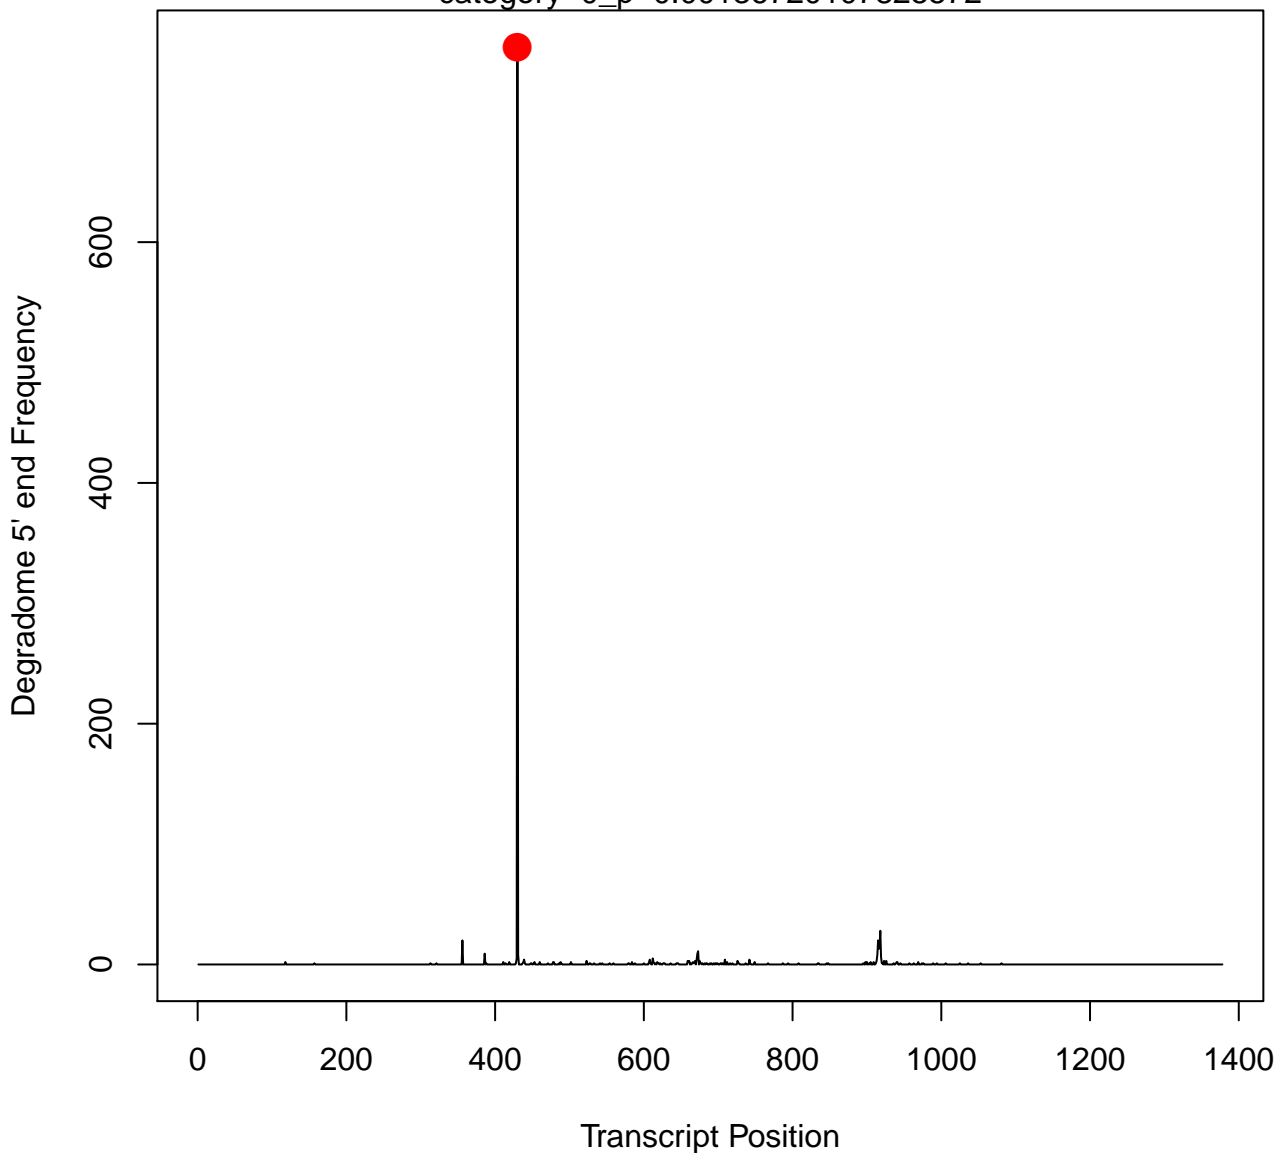

Supplement: s1 [file s1]

**T=Cluster-18410.71100\_Q=novel\_79\_S=813**

category=3\_p=0.0831820937889345

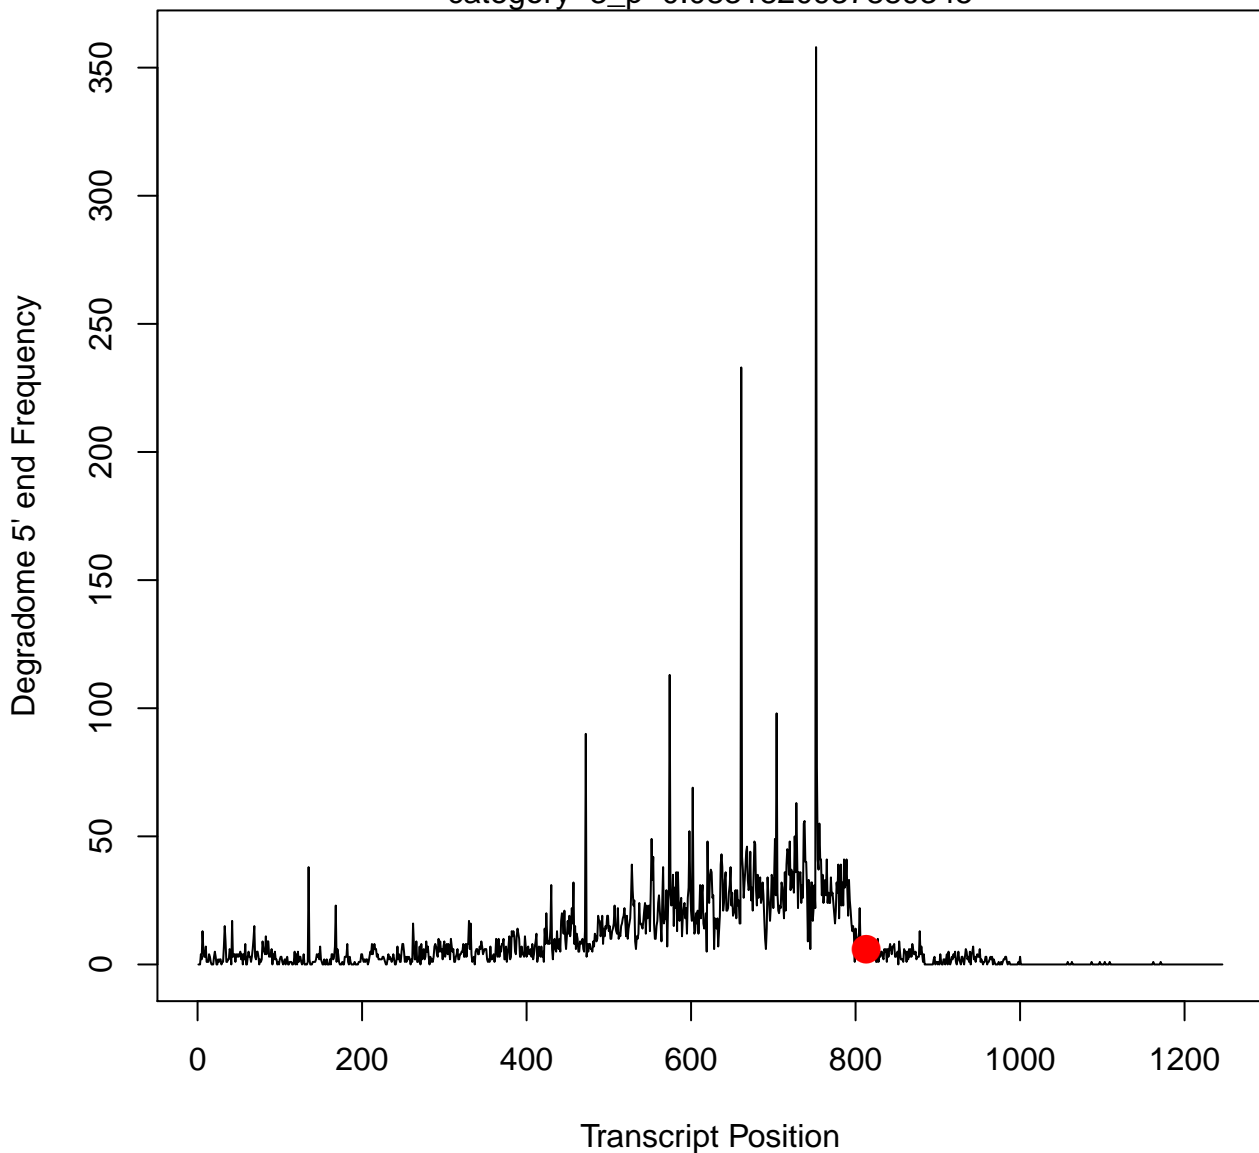

Supplement: s1 [file s1]

**T=Cluster-18410.100687\_Q=novel\_46\_S=203**

category=0\_p=0.00245961596621247

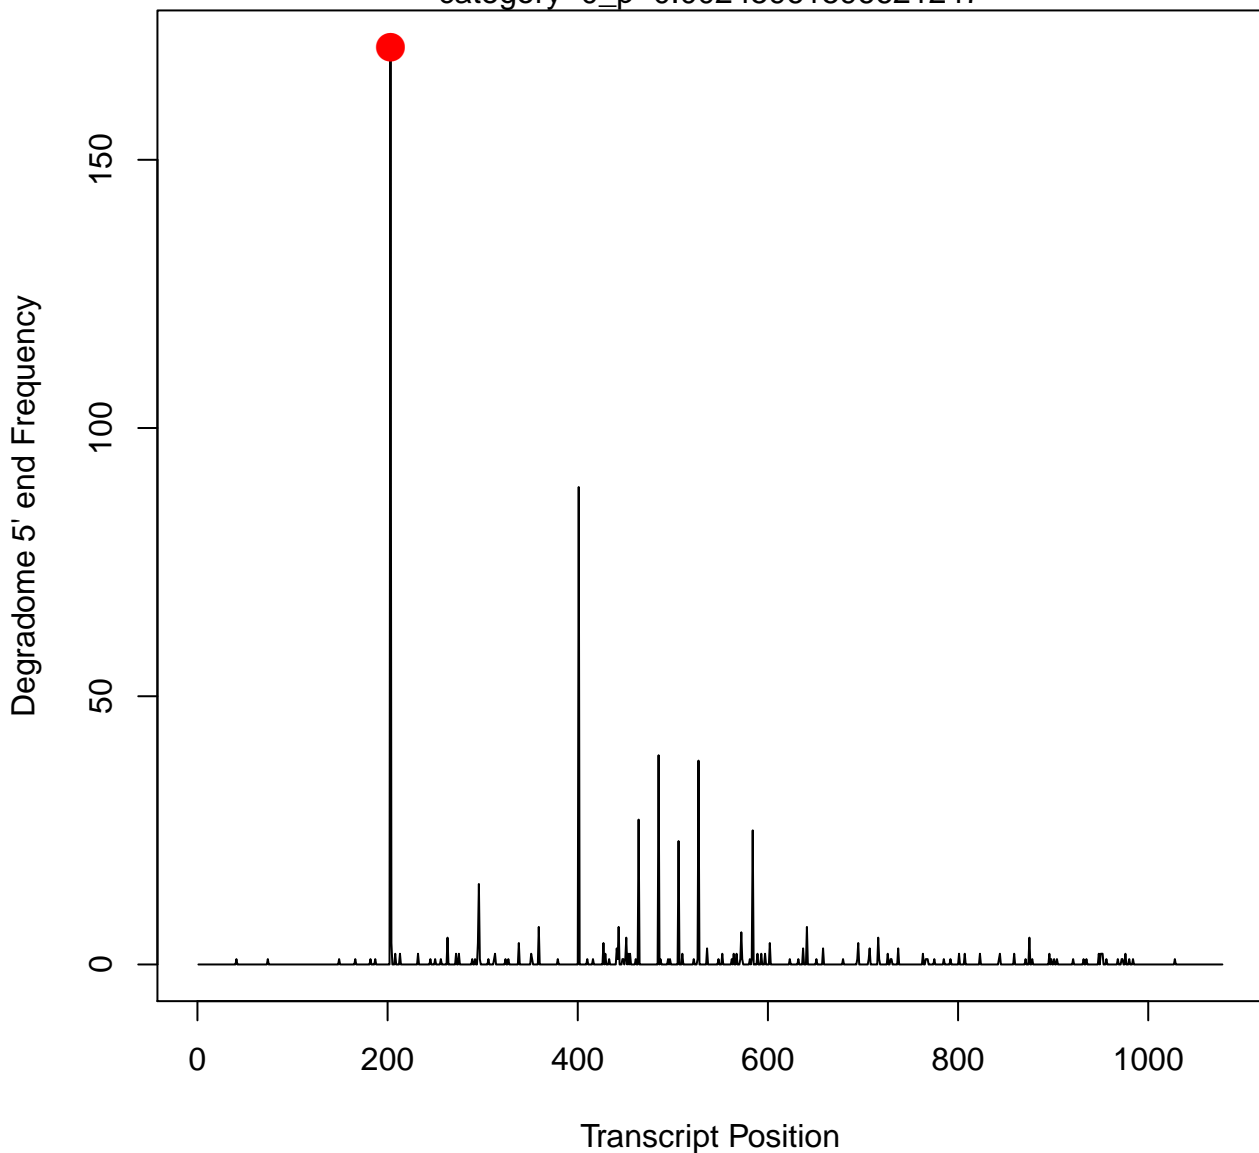

Supplement: s1 [file s1]

**T=Cluster-18410.84608\_Q=pma-miR482a\_S=128**

category=0\_p=0.0272579679577469

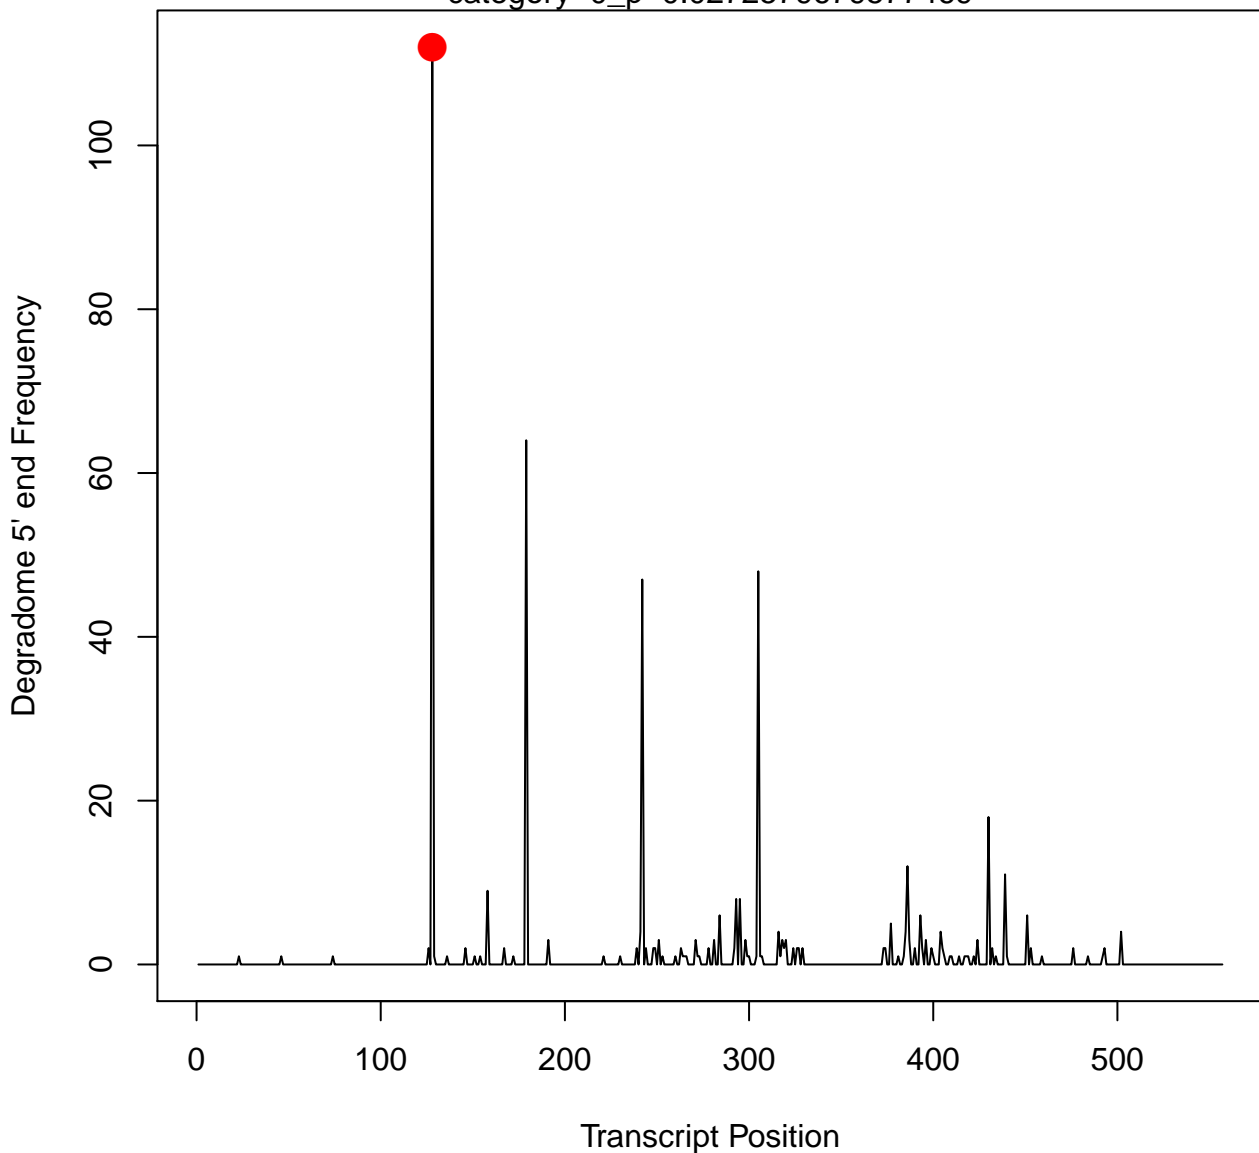

Supplement: s1 [file s1]

**T=Cluster-18410.43736\_Q=novel\_183\_S=452**

category=0\_p=0.000547104903662499

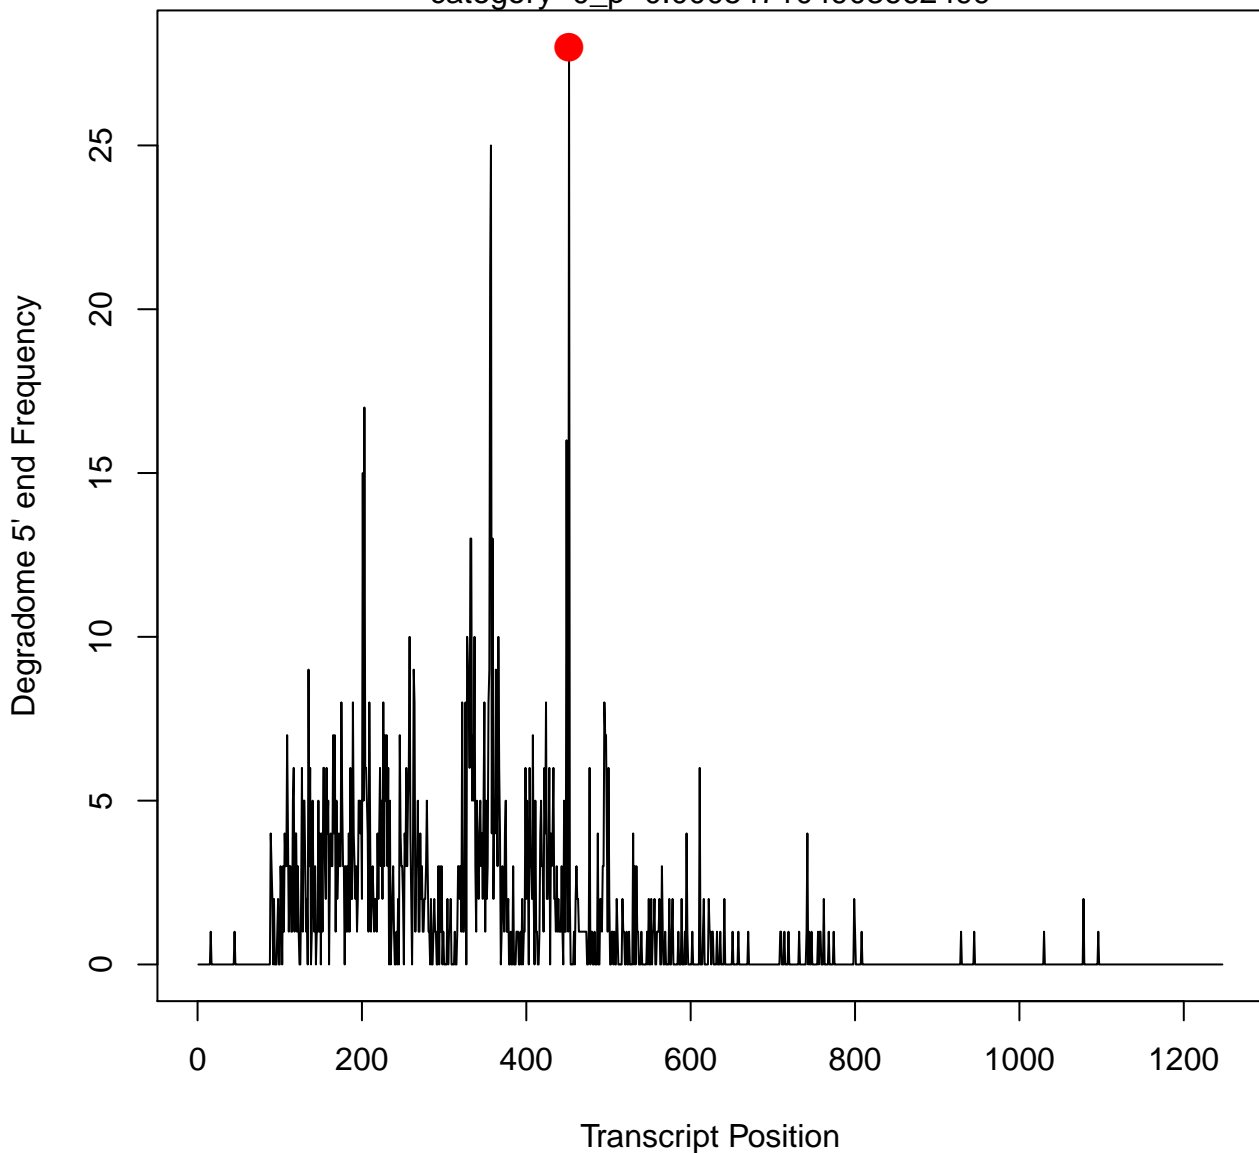

Supplement: s1 [file s1]

**T=Cluster-18410.105123\_Q=novel\_14\_S=435**

category=0\_p=0.00545759909929999

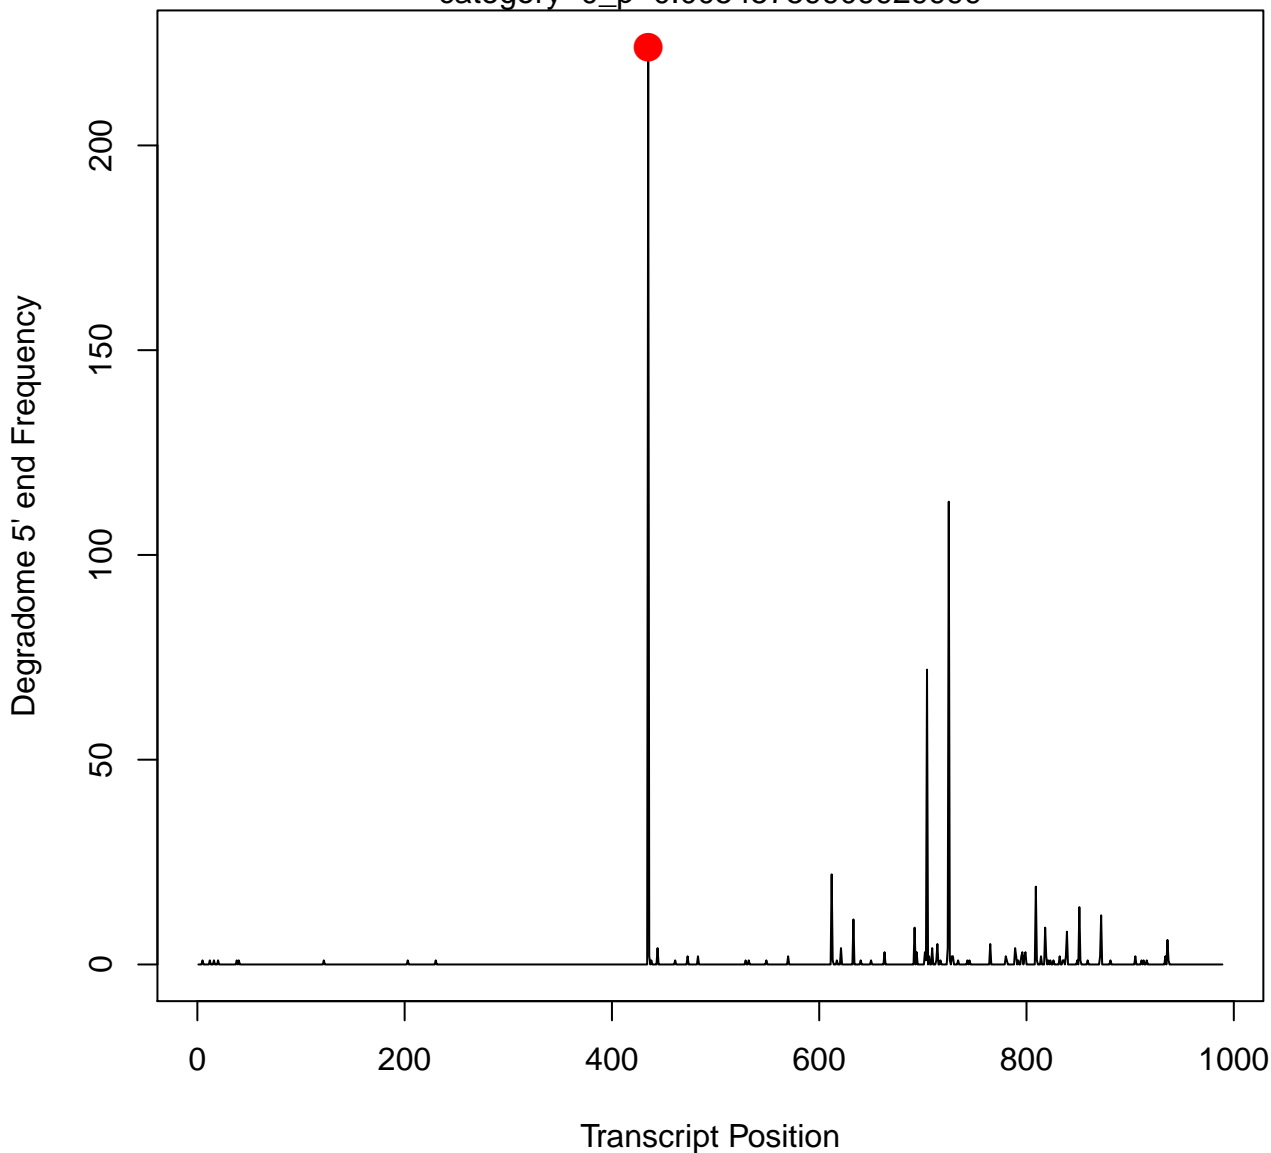

Supplement: s1 [file s1]

**T=Cluster-18410.69488\_Q=novel\_59\_S=193**

category=0\_p=0.0346822169567564

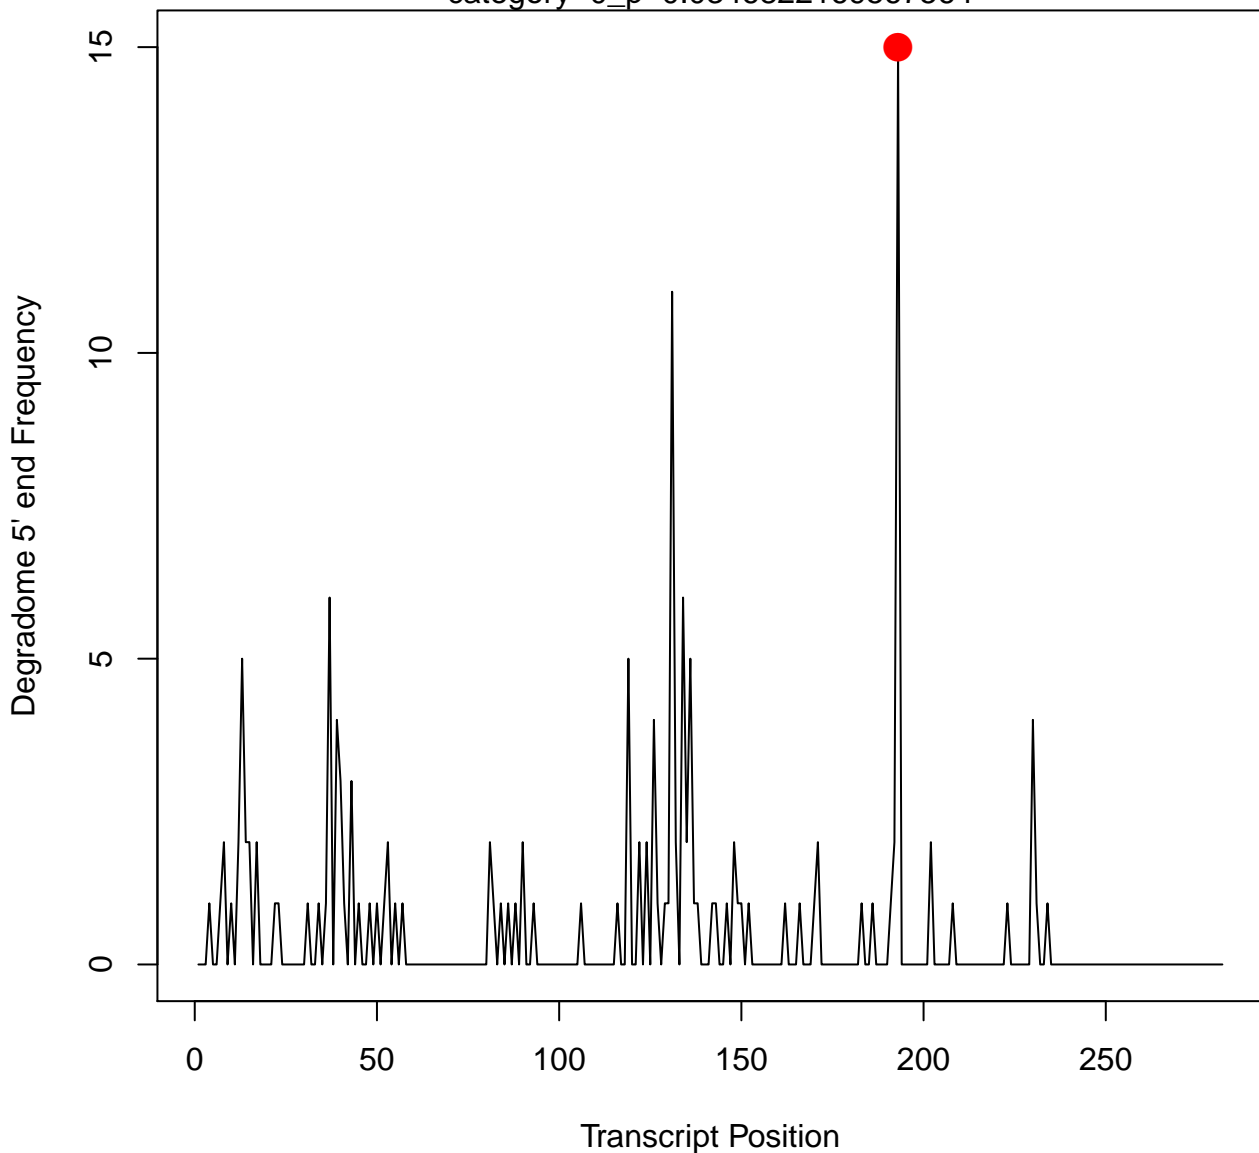

Supplement: s1 [file s1]

**T=Cluster-18410.71101\_Q=novel\_79\_S=813**

category=3\_p=0.0681306920296354

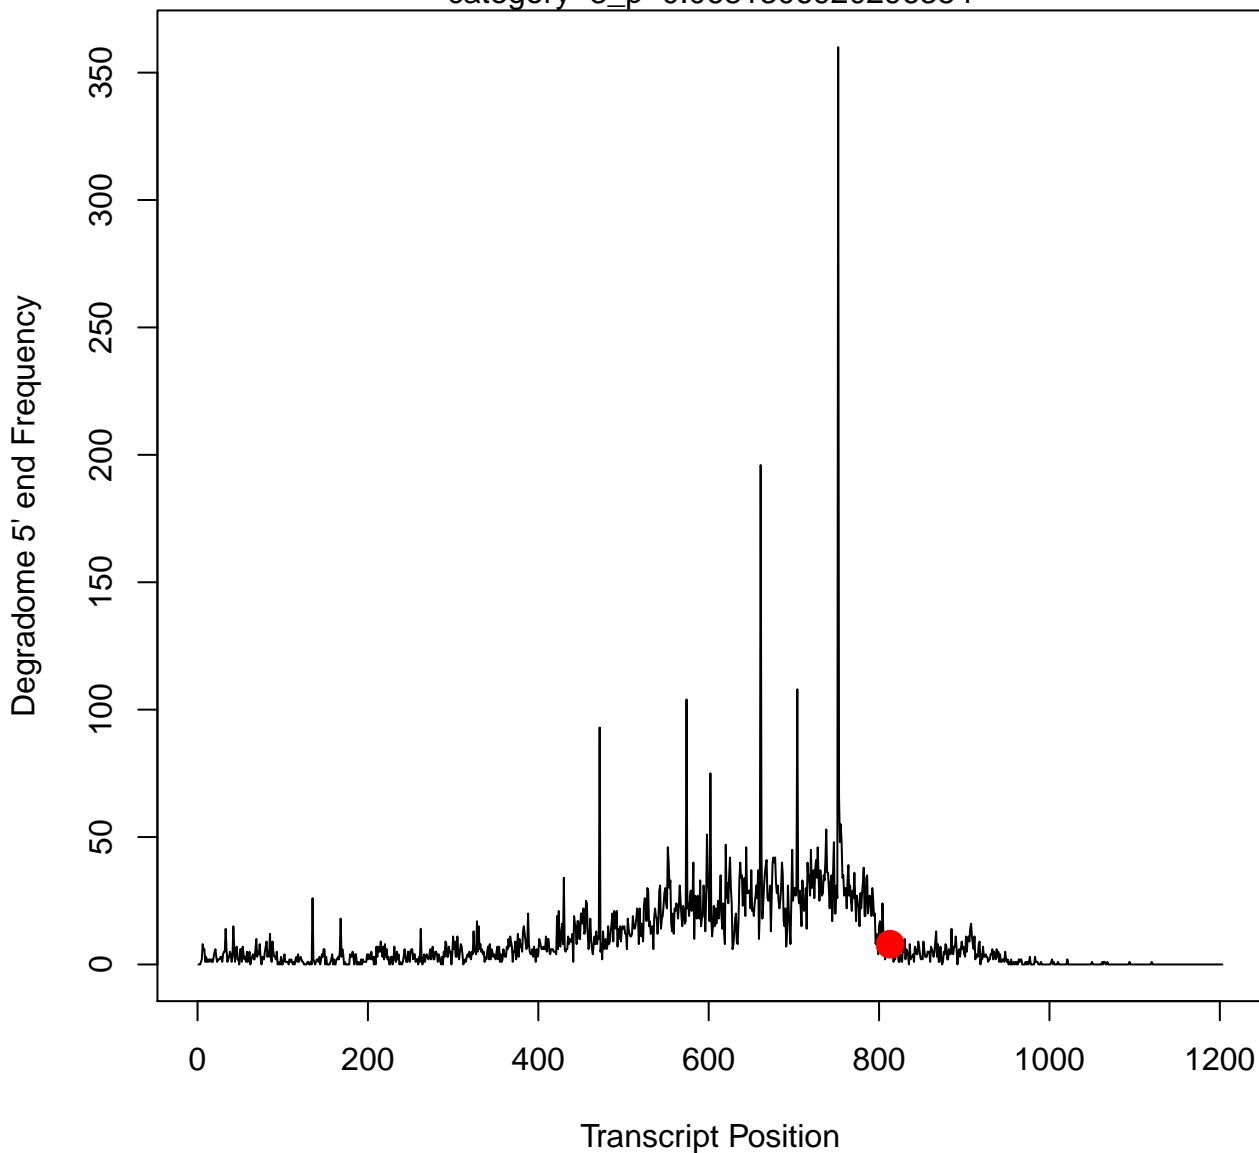

Supplement: s1 [file s1]

**T=Cluster-18410.40198\_Q=pma-miR482a\_S=353**

category=0\_p=0.0770431560473814

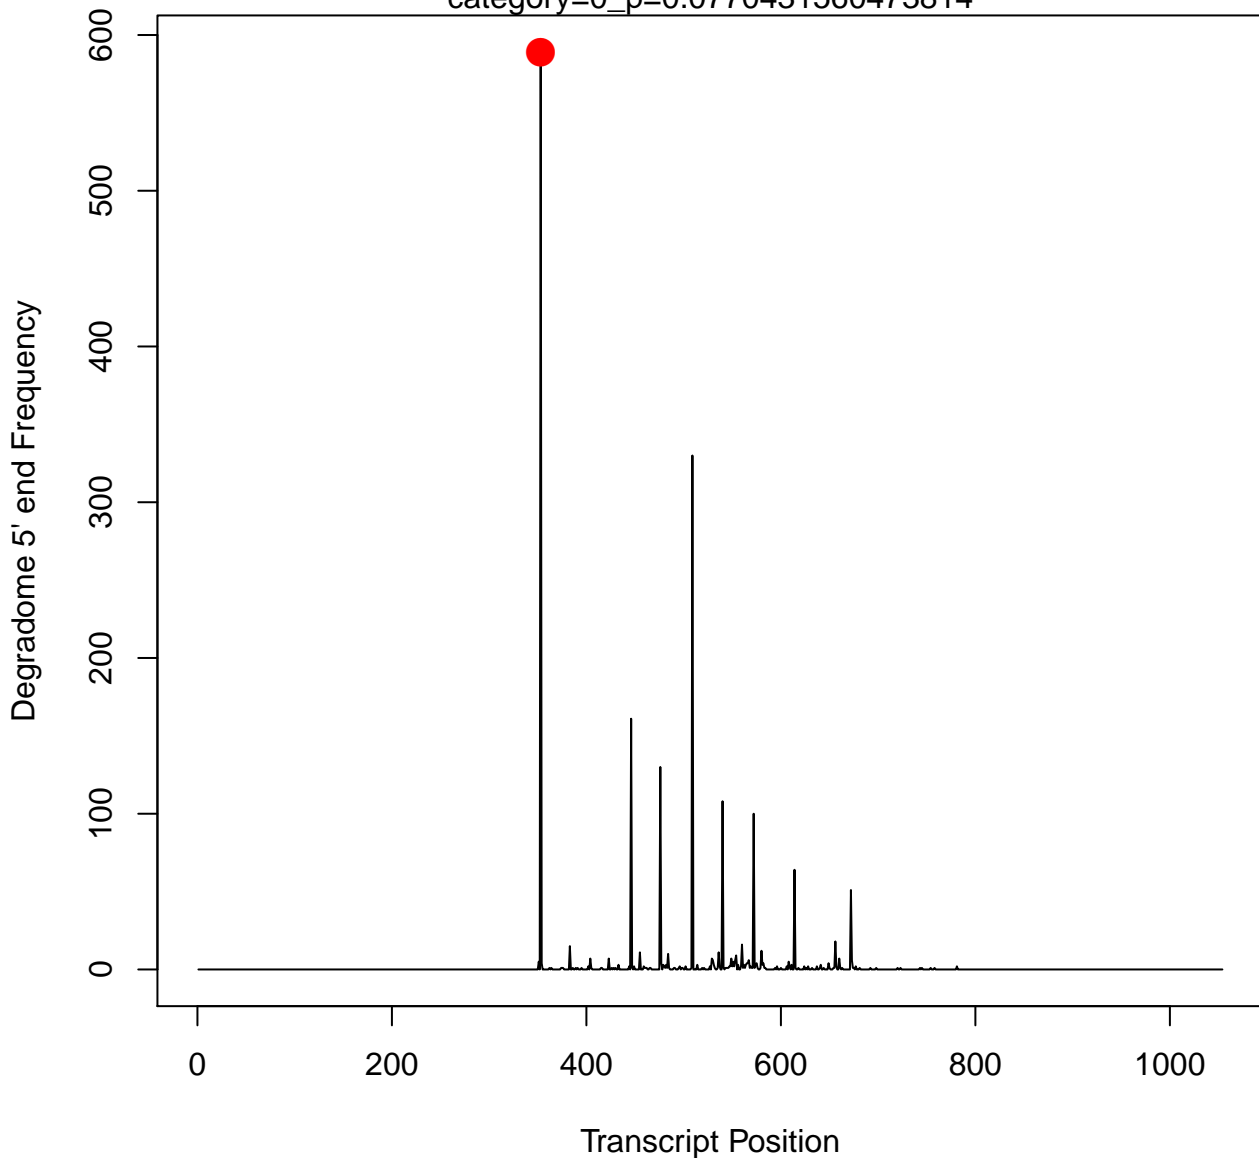

Supplement: s1 [file s1]

**T=Cluster-18410.39069\_Q=novel\_6\_S=50**

category=0\_p=0.00708906326490744

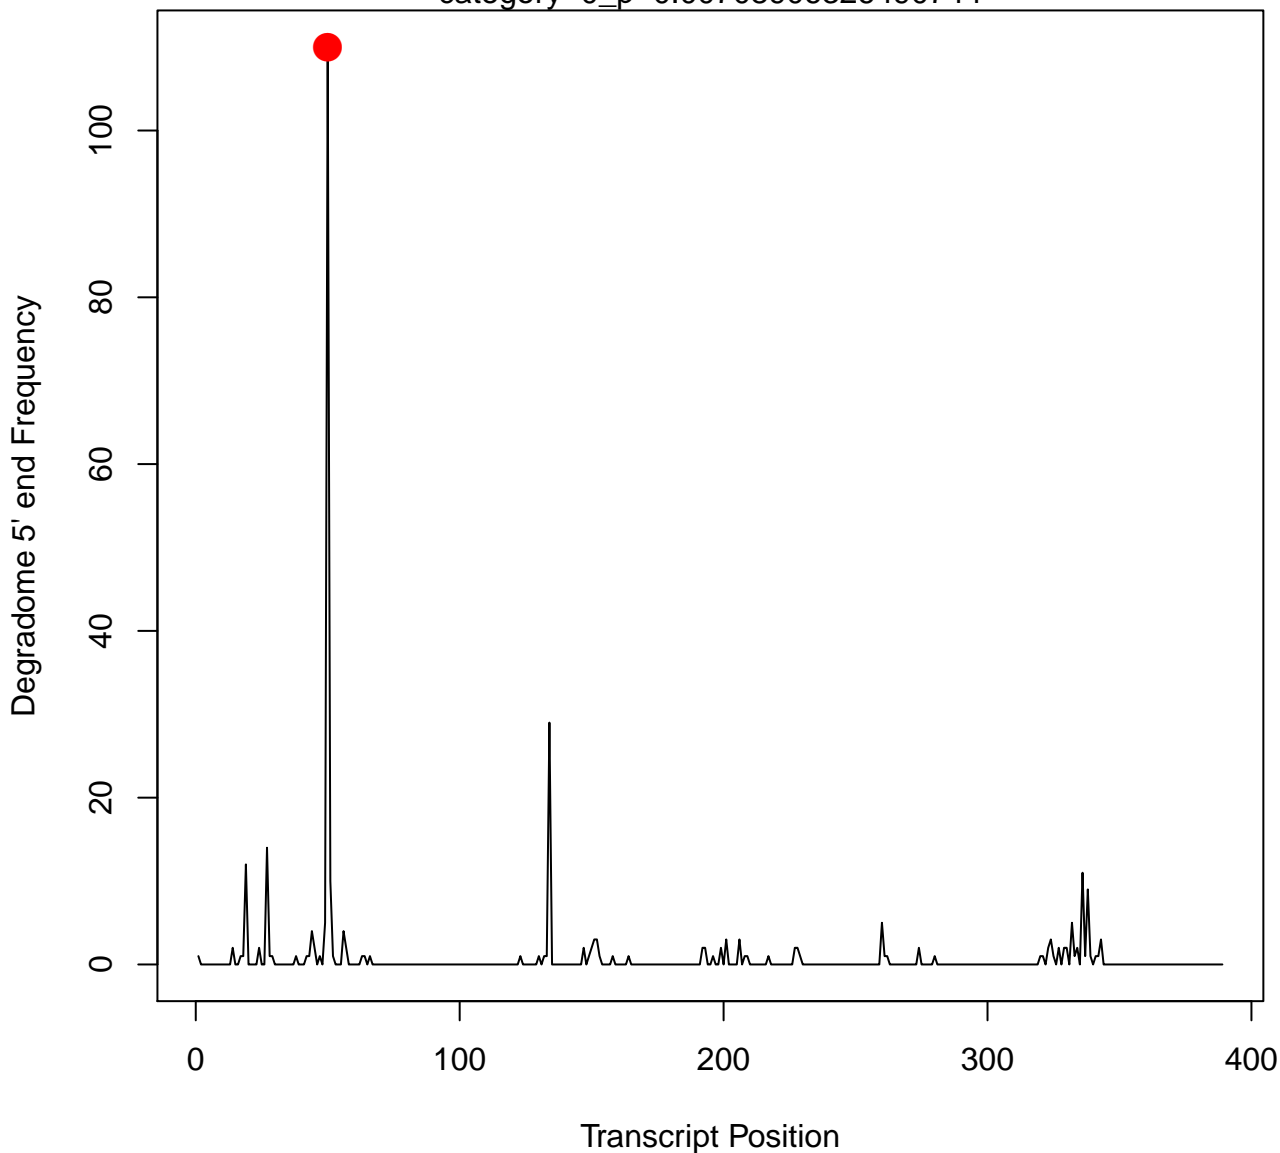

Supplement: s1 [file s1]

**T=Cluster-18410.68783\_Q=novel\_59\_S=415**

category=2\_p=0.0342485307007228

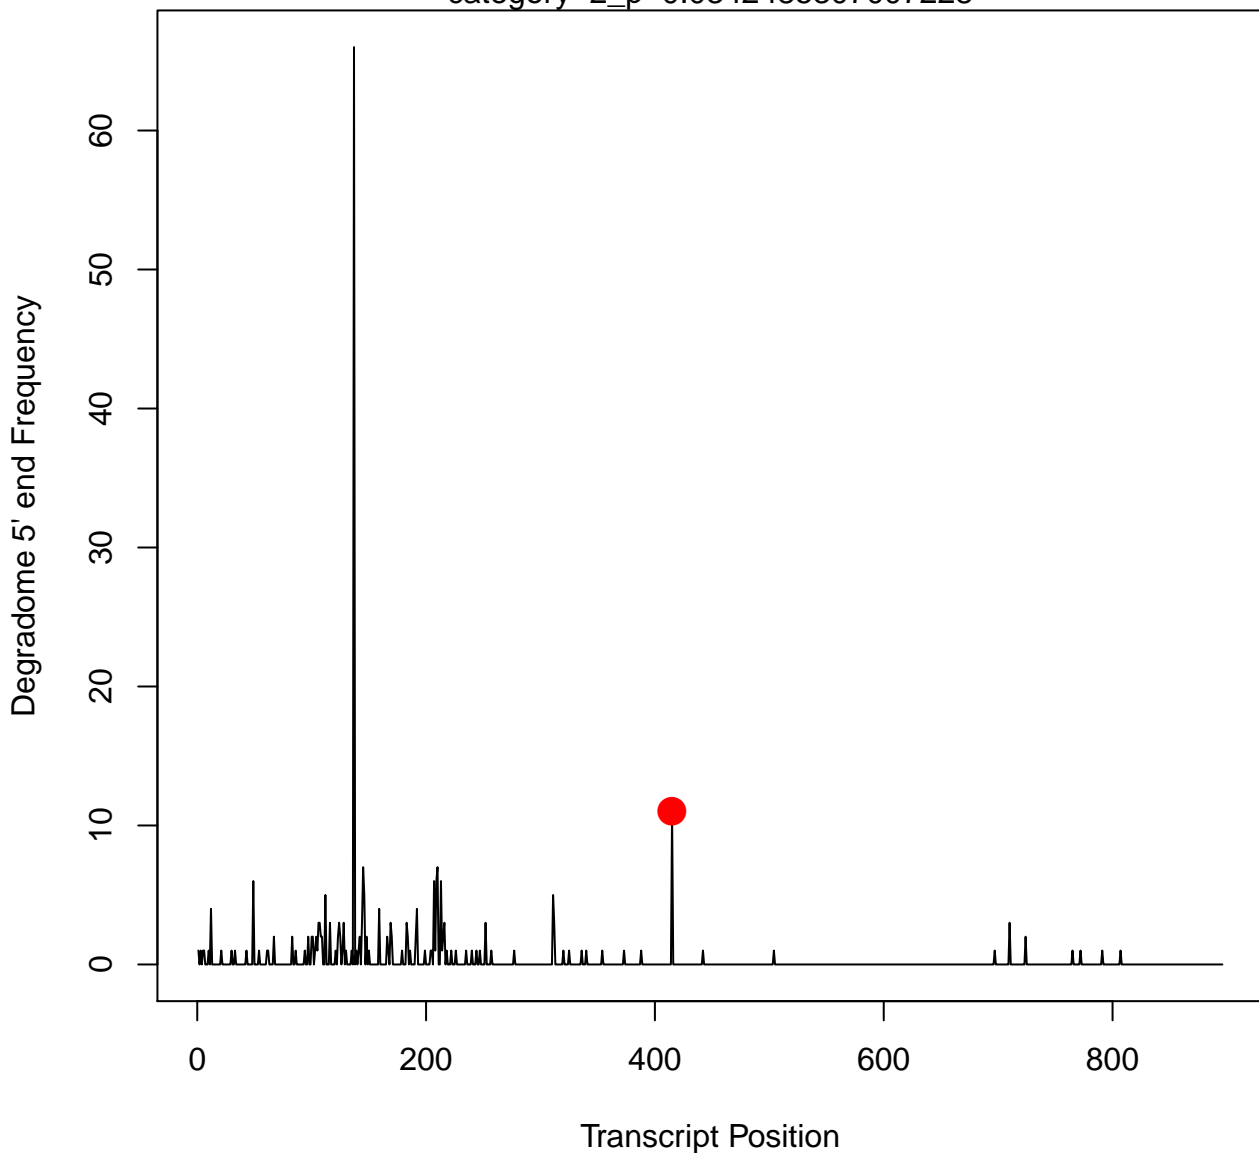

Supplement: s1 [file s1]

**T=Cluster-18410.114802\_Q=novel\_2\_S=1487**

category=0\_p=0.00327814283922701

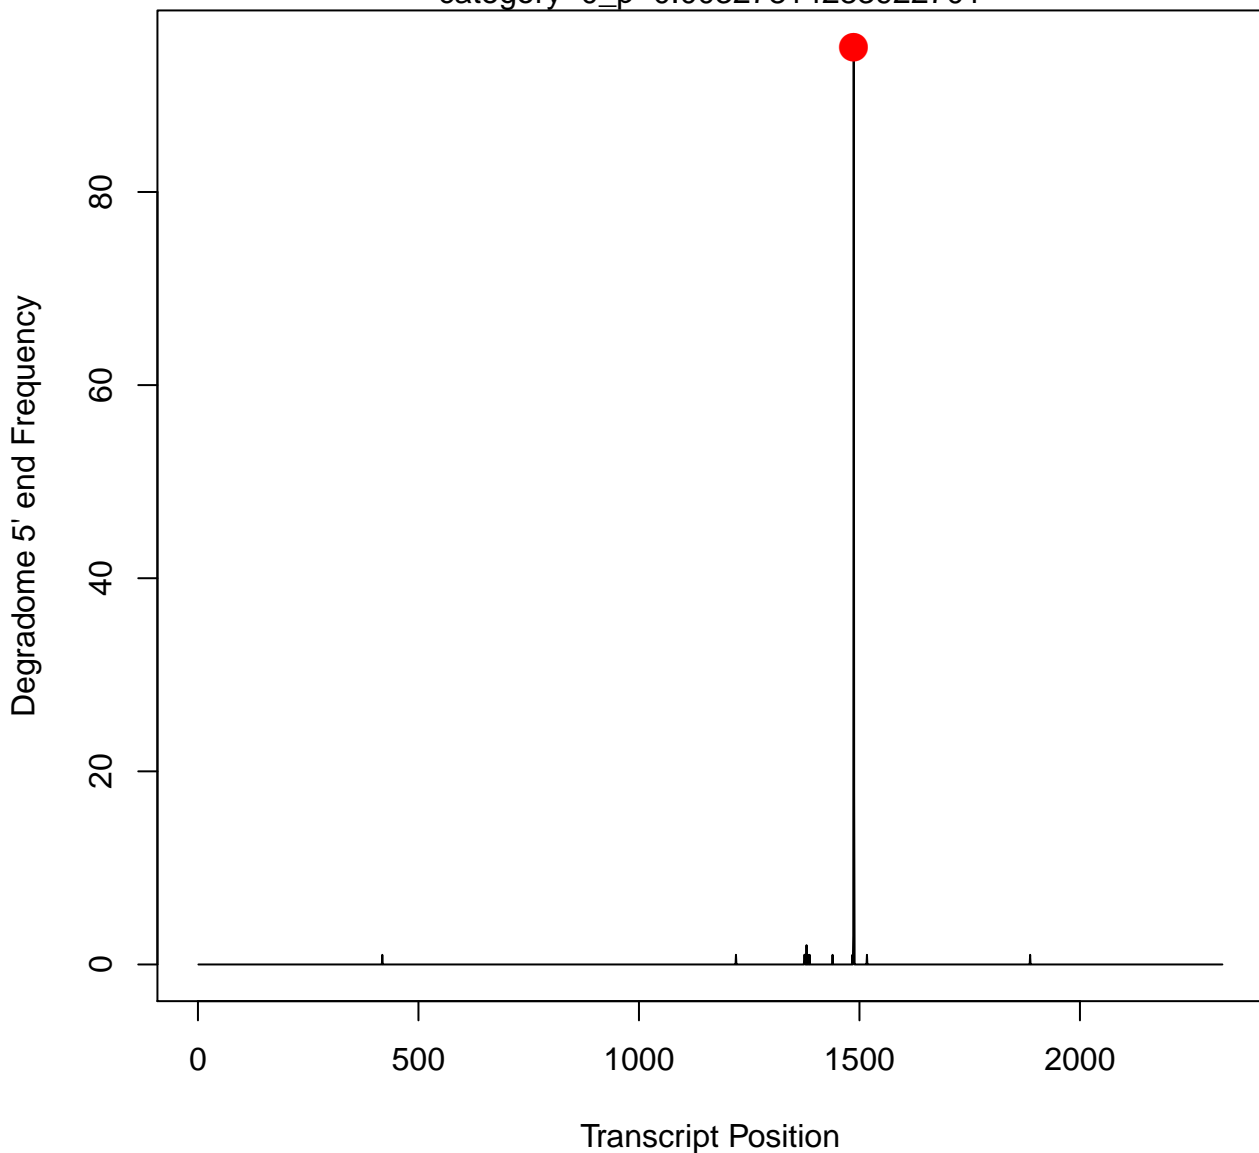

Supplement: s1 [file s1]

**T=Cluster-18410.80622\_Q=novel\_14\_S=829**

category=0\_p=0.0108854128106712

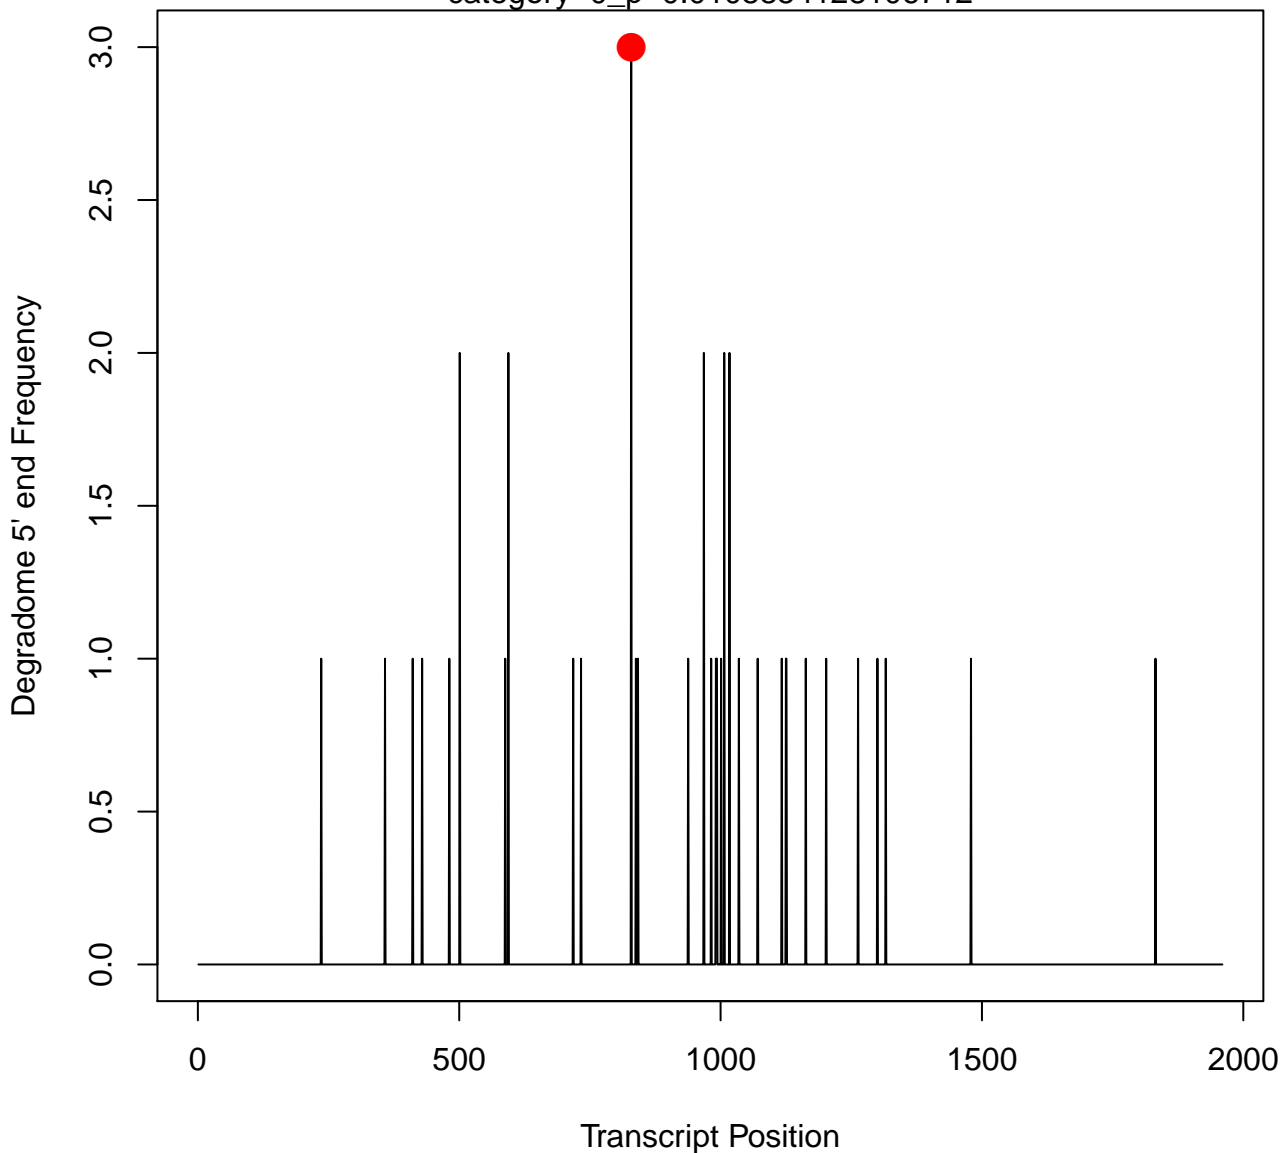

Supplement: s1 [file s1]

**T=Cluster-18410.32964\_Q=pma-miR946a-3p\_S=345**

category=0\_p=0.0383730653416321

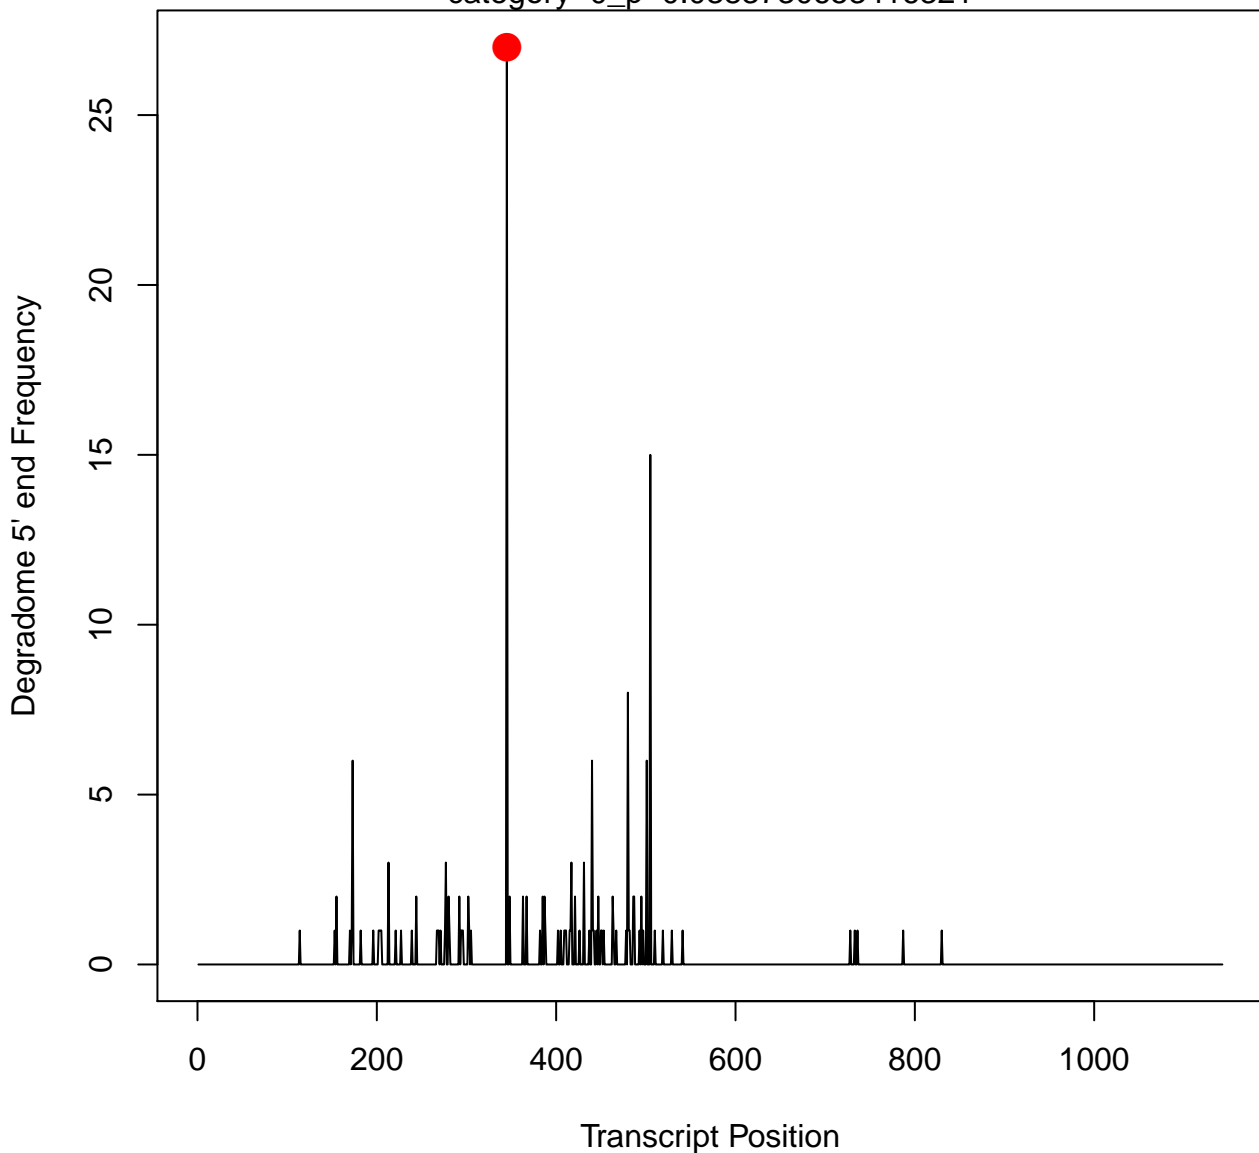

Supplement: s1 [file s1]

**T=Cluster-18410.96074\_Q=novel\_114\_S=488**

category=0\_p=0.0256596435673687

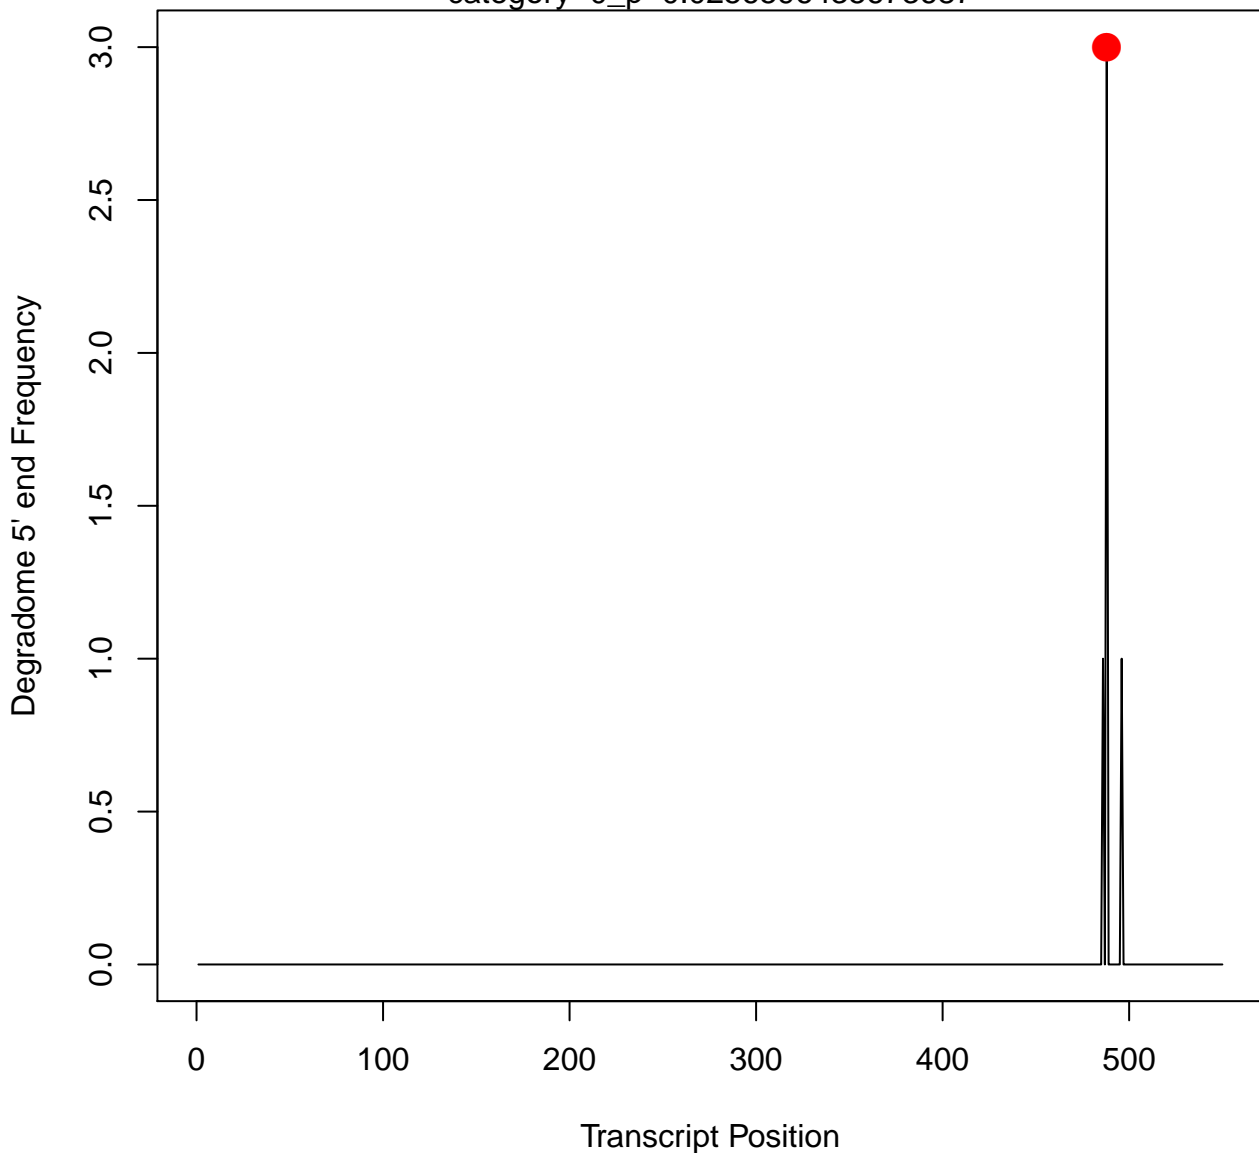

Supplement: s1 [file s1]

**T=Cluster-18410.25717\_Q=novel\_15\_S=321**

category=0\_p=0.00164041690342198

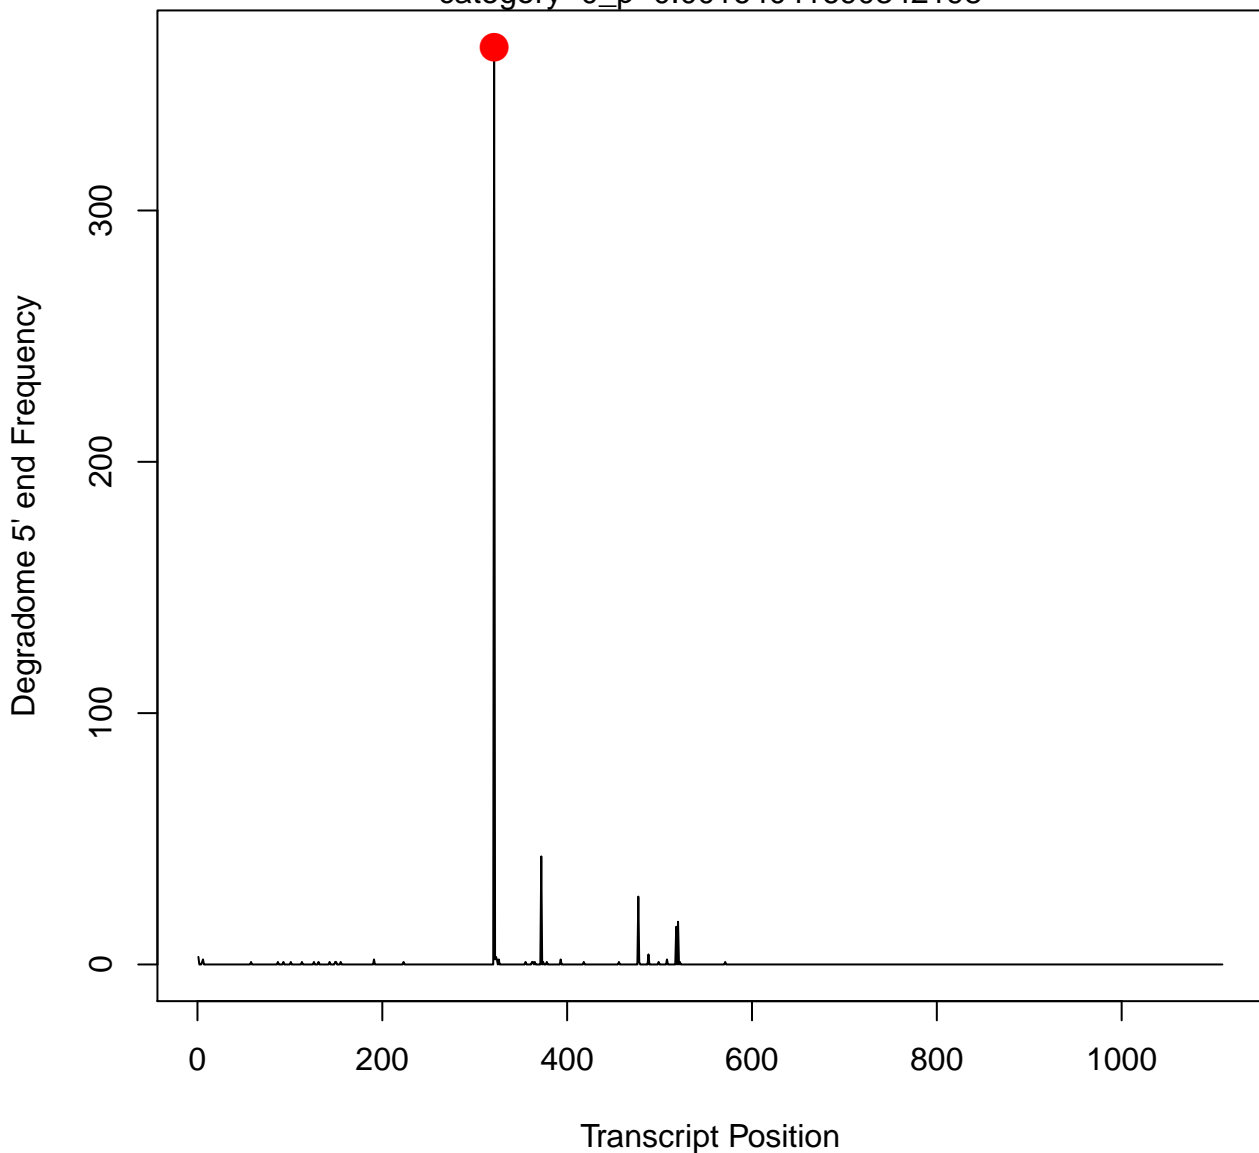

Supplement: s1 [file s1]

**T=Cluster-18410.50085\_Q=novel\_195\_S=1695**

category=3\_p=0.063058846212125

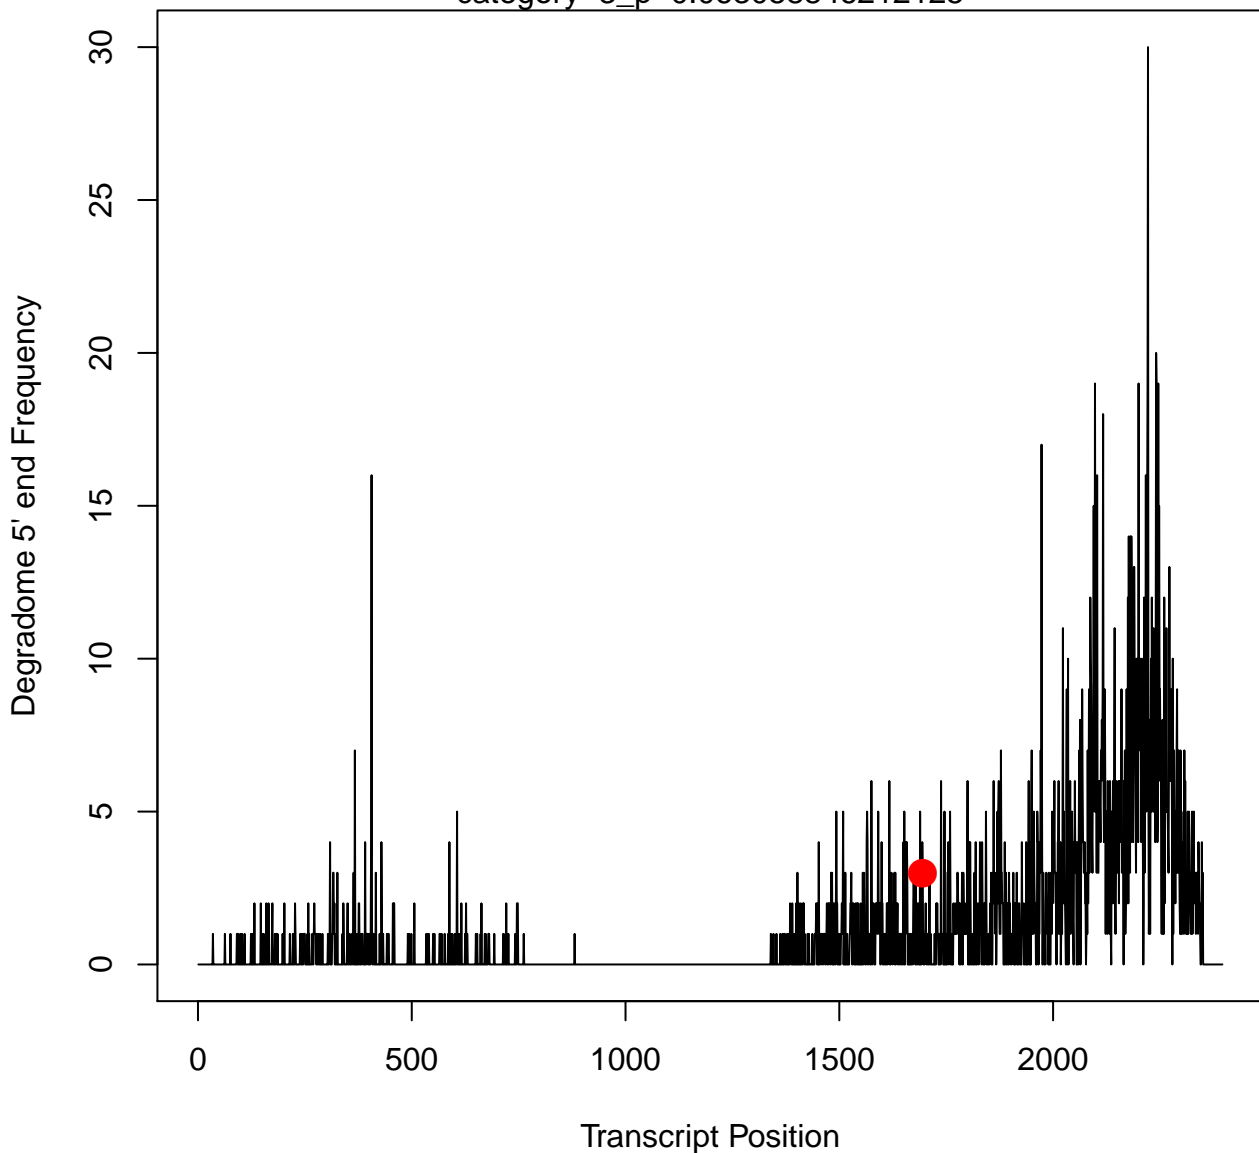

Supplement: s1 [file s1]

**T=Cluster-18410.86997\_Q=novel\_12\_S=376**

category=4\_p=0.0942809831727407

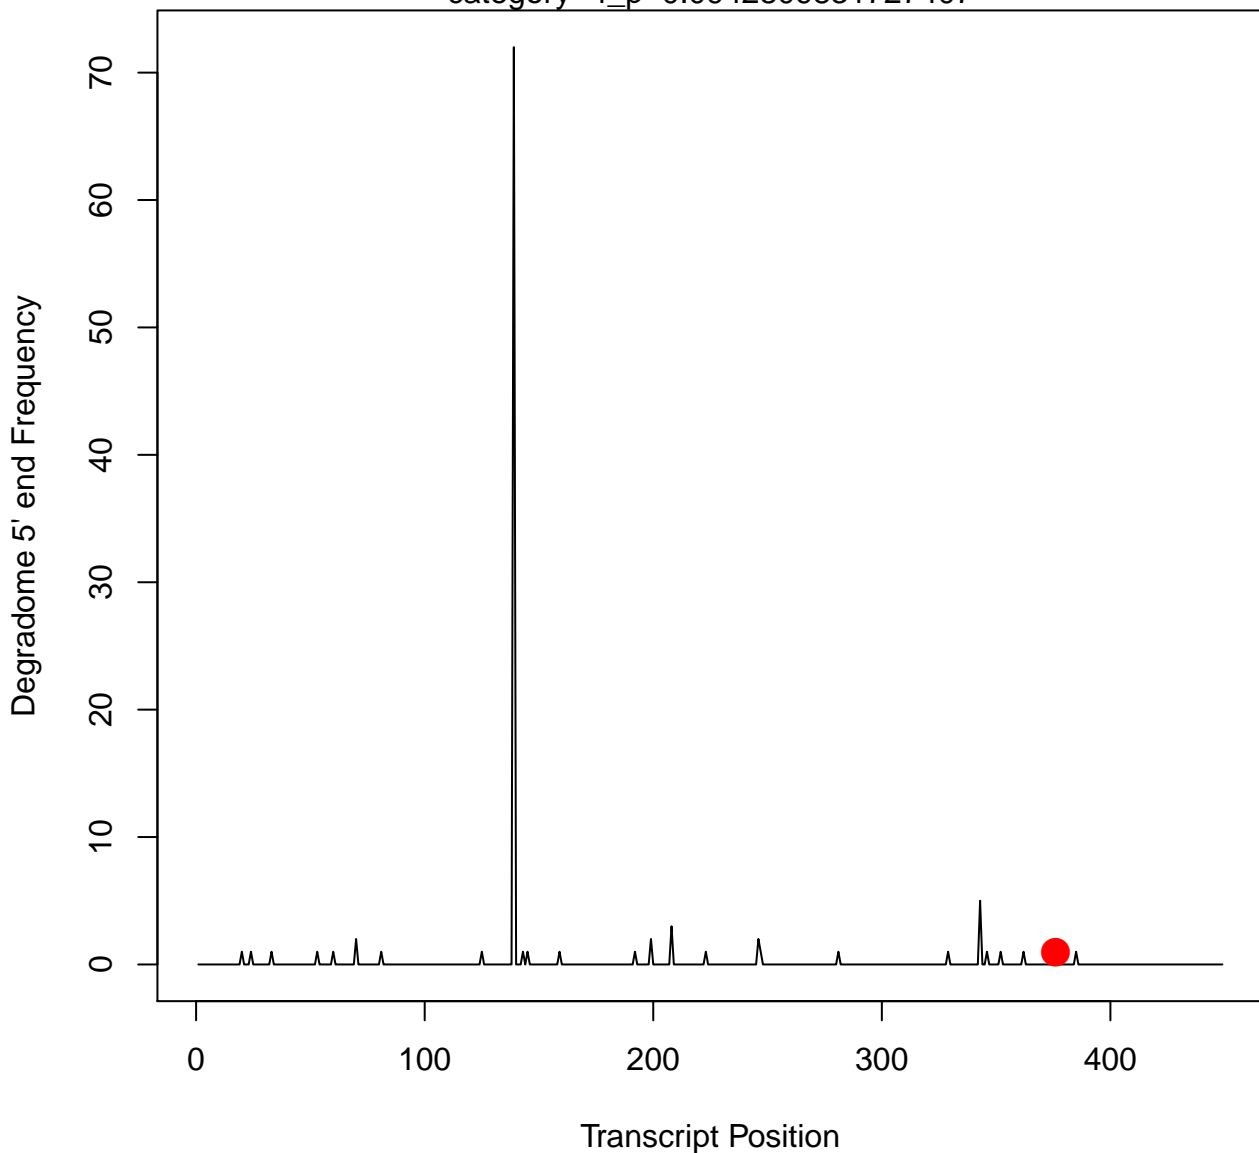

Supplement: s1 [file s1]

**T=Cluster-18410.45116\_Q=novel\_42\_S=58**

category=0\_p=0.0125079730989179

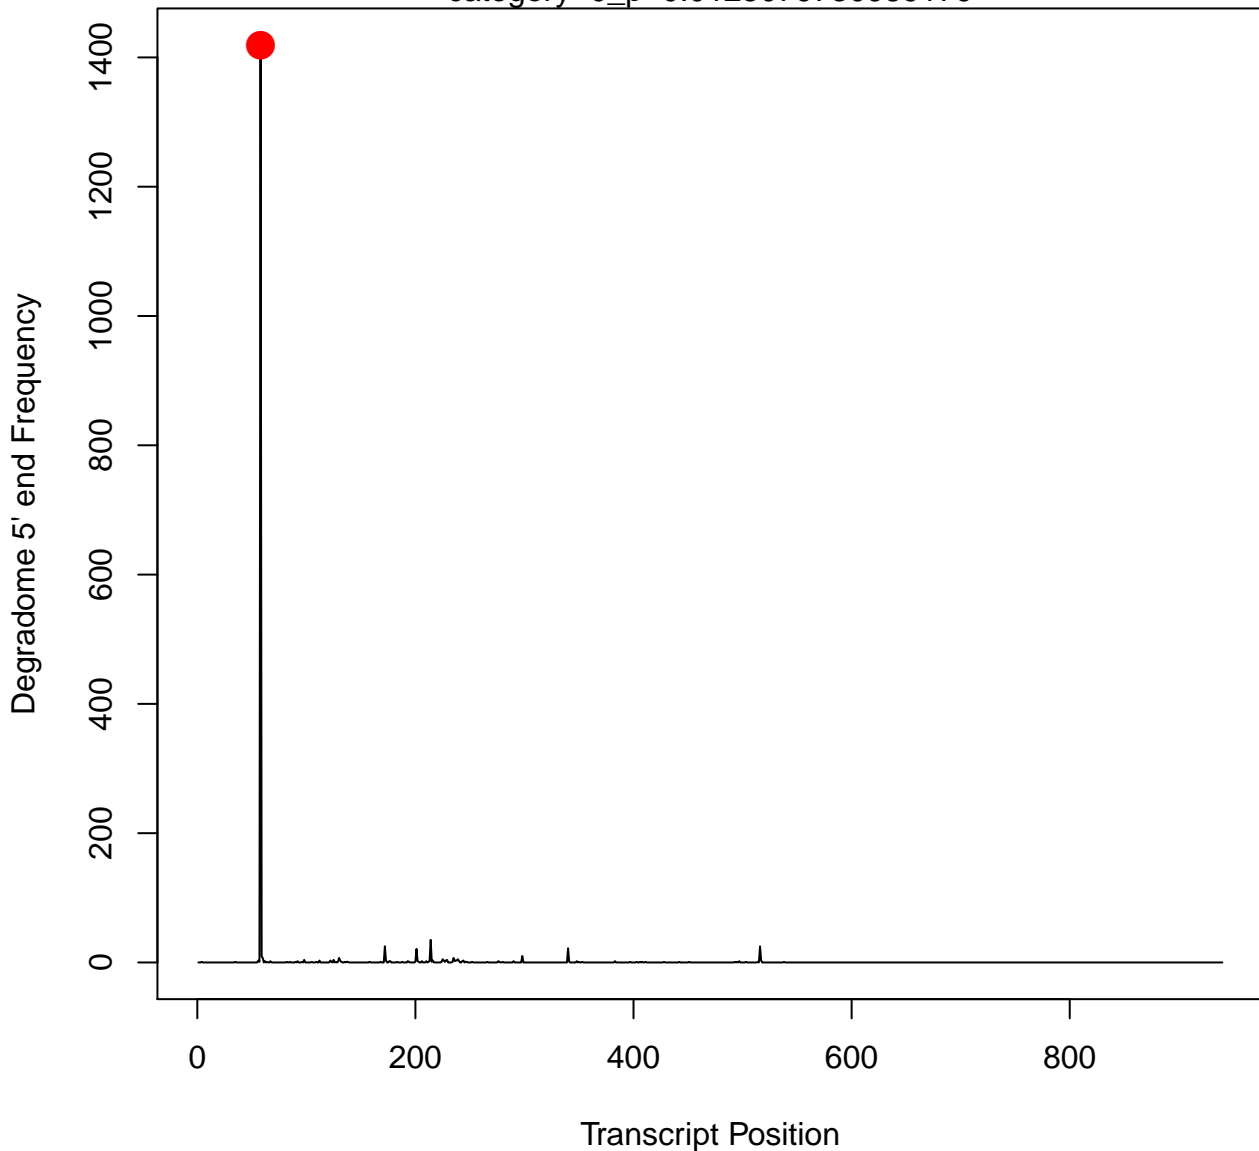

Supplement: s1 [file s1]

**T=Cluster-18410.35924\_Q=pma-miR951\_S=298**

category=0\_p=0.00627366599194823

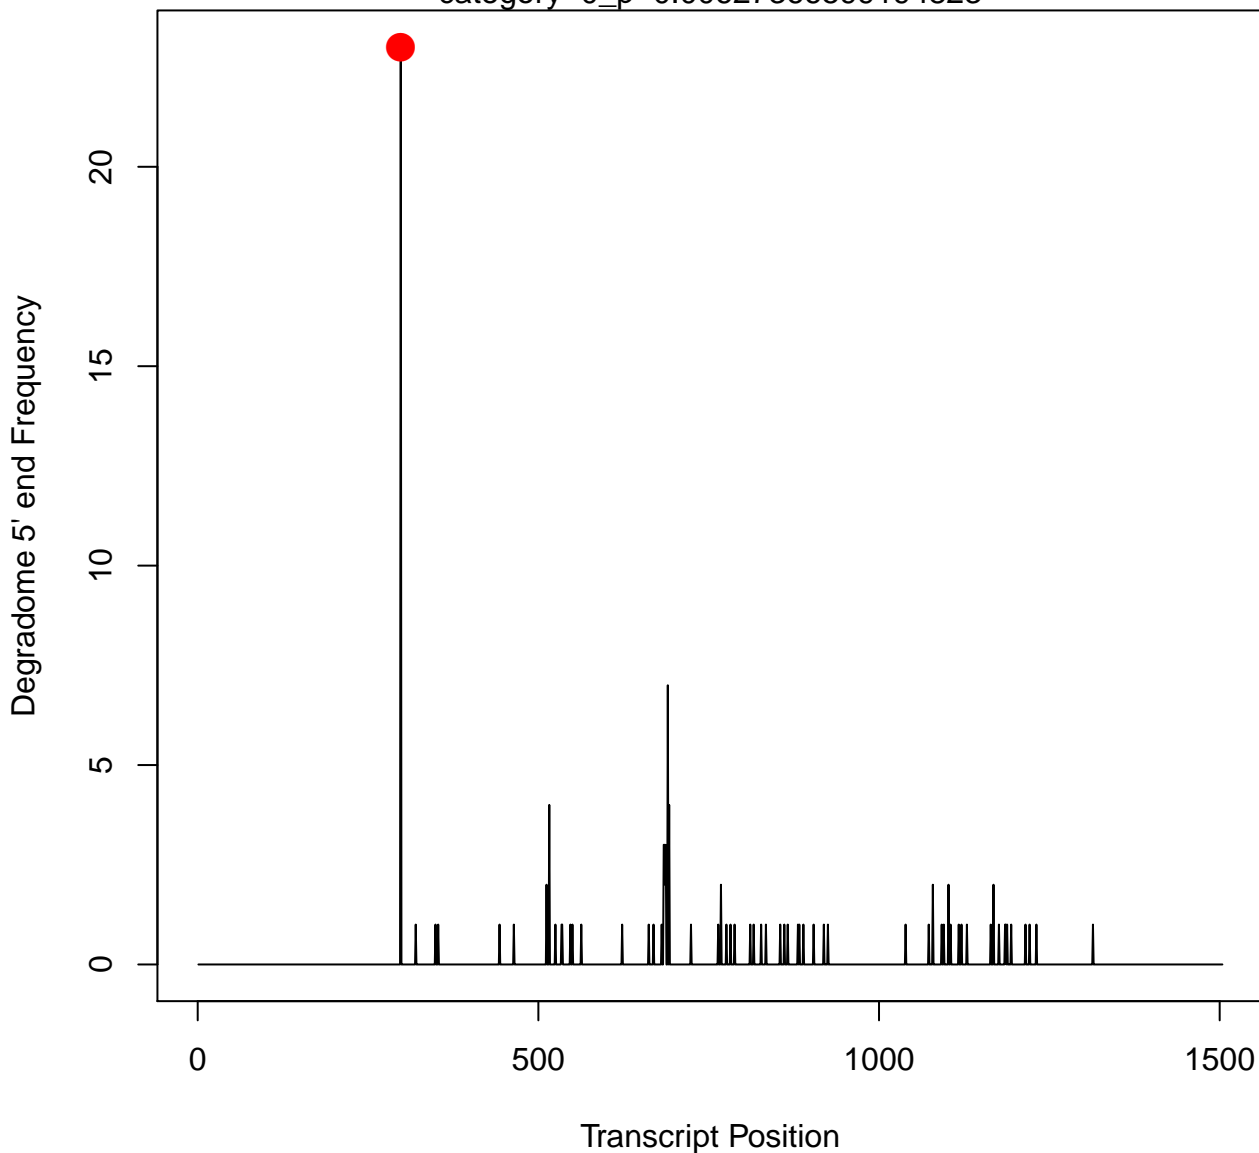

Supplement: s1 [file s1]

**T=Cluster-18410.81350\_Q=novel\_158\_S=103**

category=2\_p=0.0115490438418195

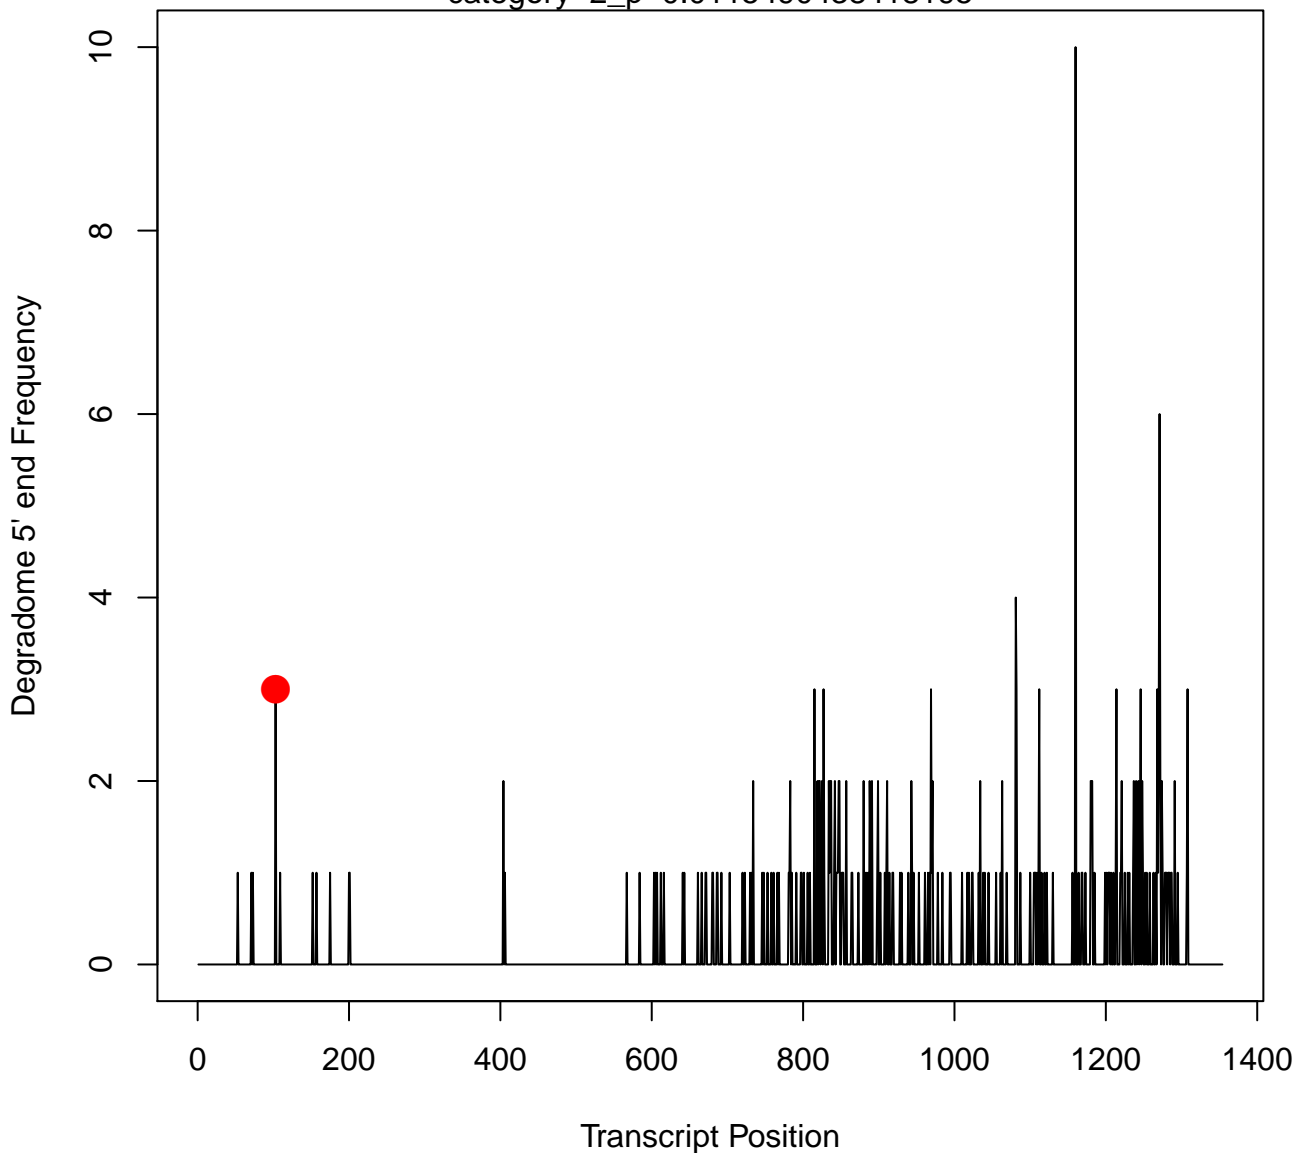

Supplement: s1 [file s1]

**T=Cluster-18410.71611\_Q=novel\_174\_S=466**

category=2\_p=0.0673240995462872

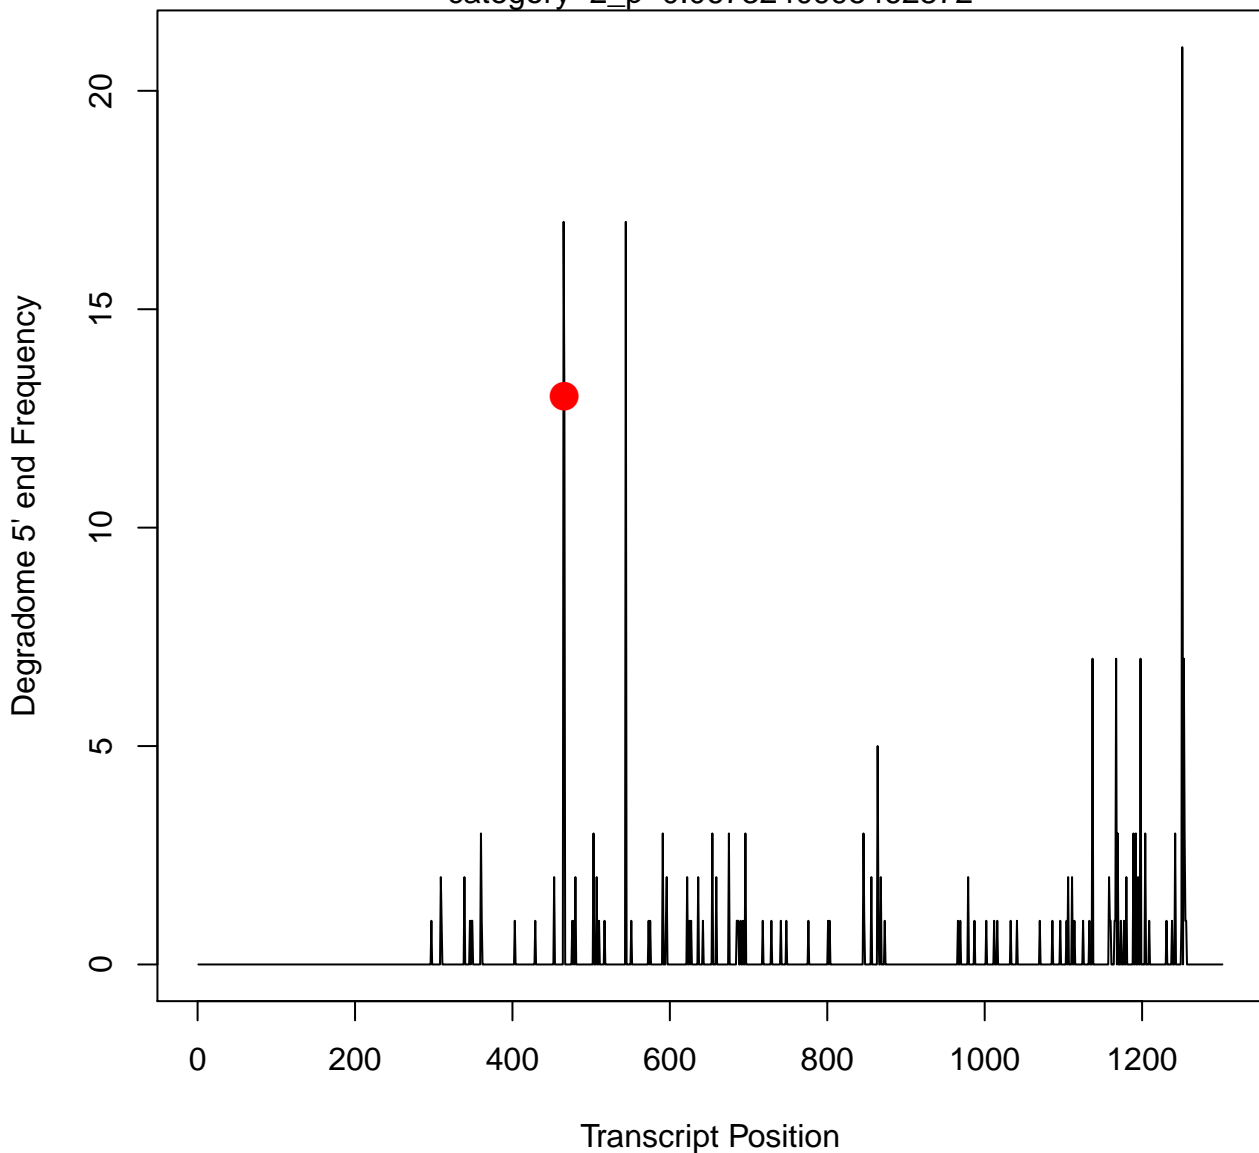

Supplement: s1 [file s1]

**T=Cluster-18410.75029\_Q=novel\_20\_S=1837**

category=0\_p=0.0100731331718849

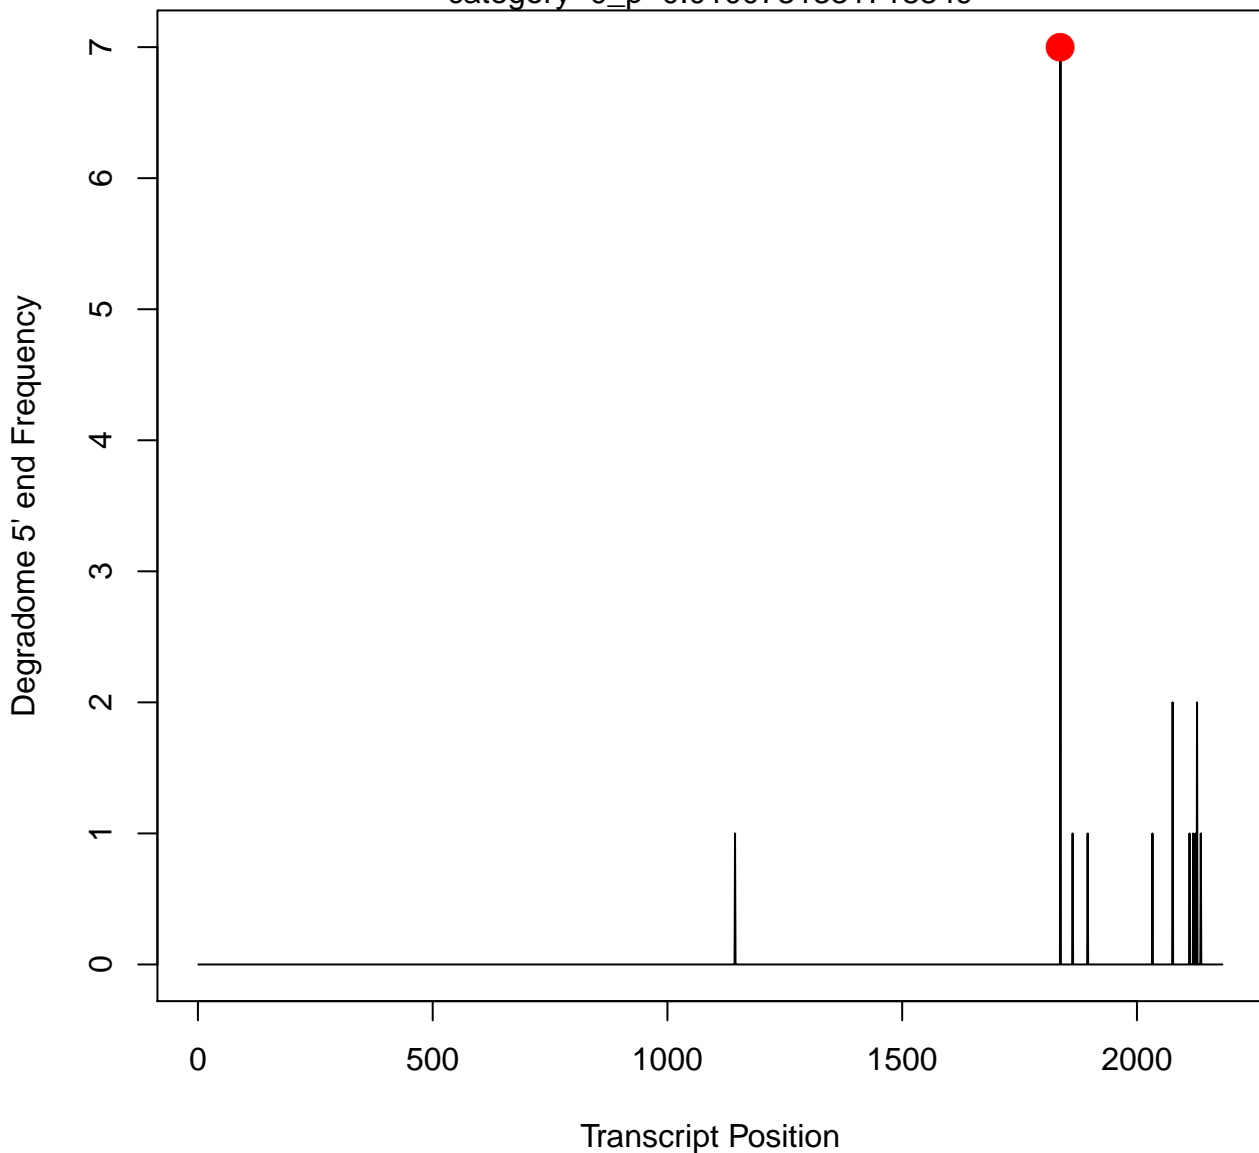

Supplement: s1 [file s1]

**T=Cluster-18410.41171\_Q=novel\_65\_S=1361**

category=2\_p=0.0780956144108357

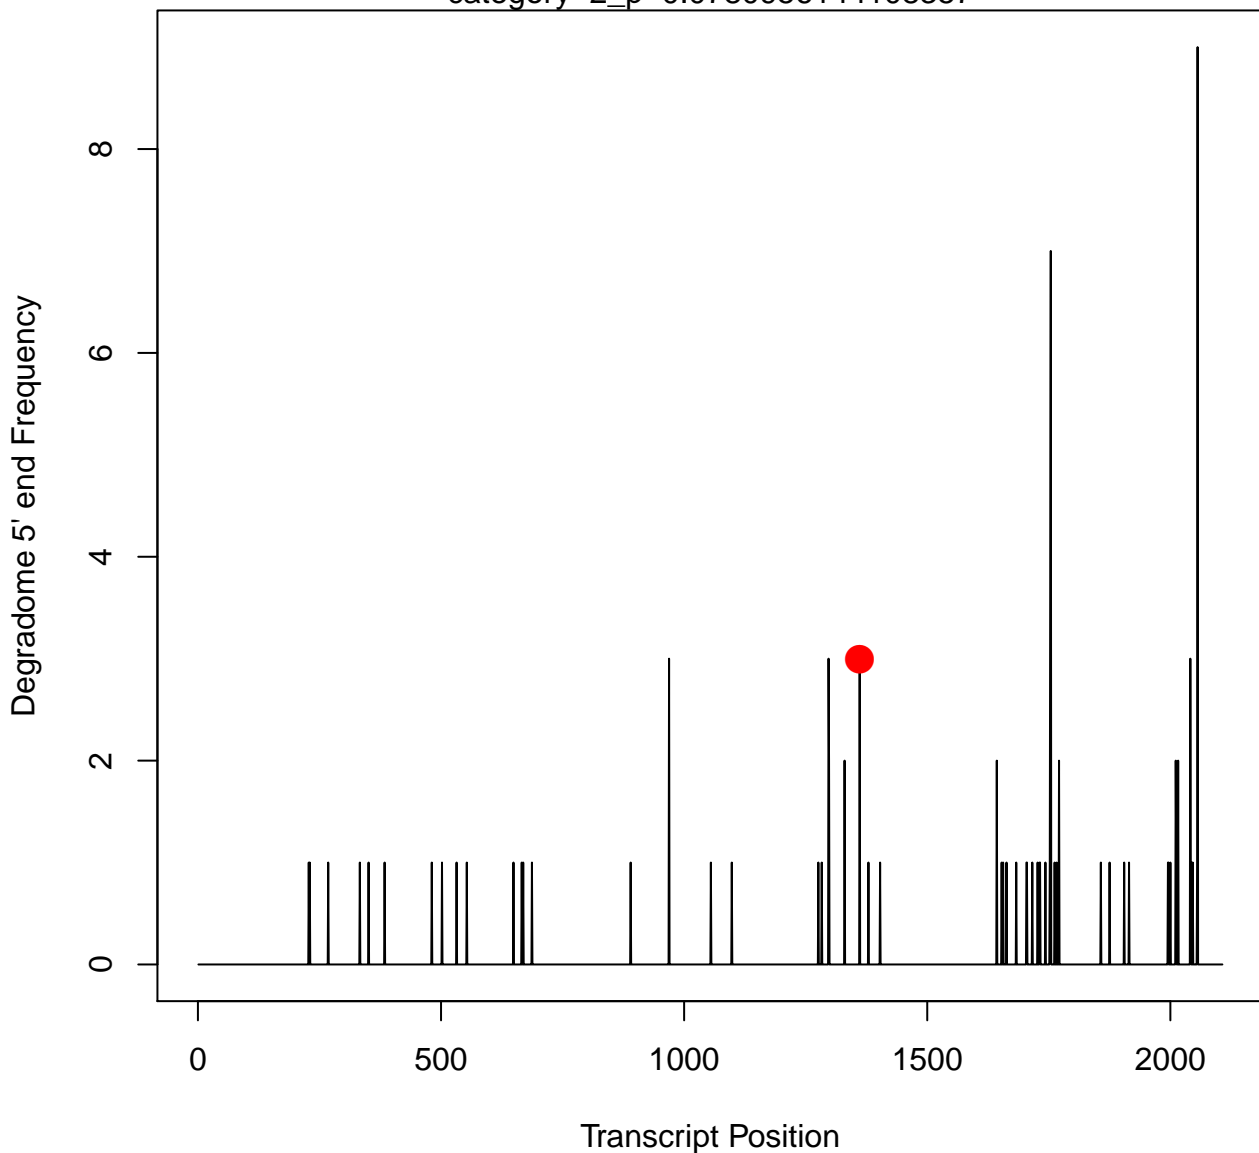

Supplement: s1 [file s1]

**T=Cluster-18410.92321\_Q=novel\_168\_S=570**

category=0\_p=0.0200447983318711

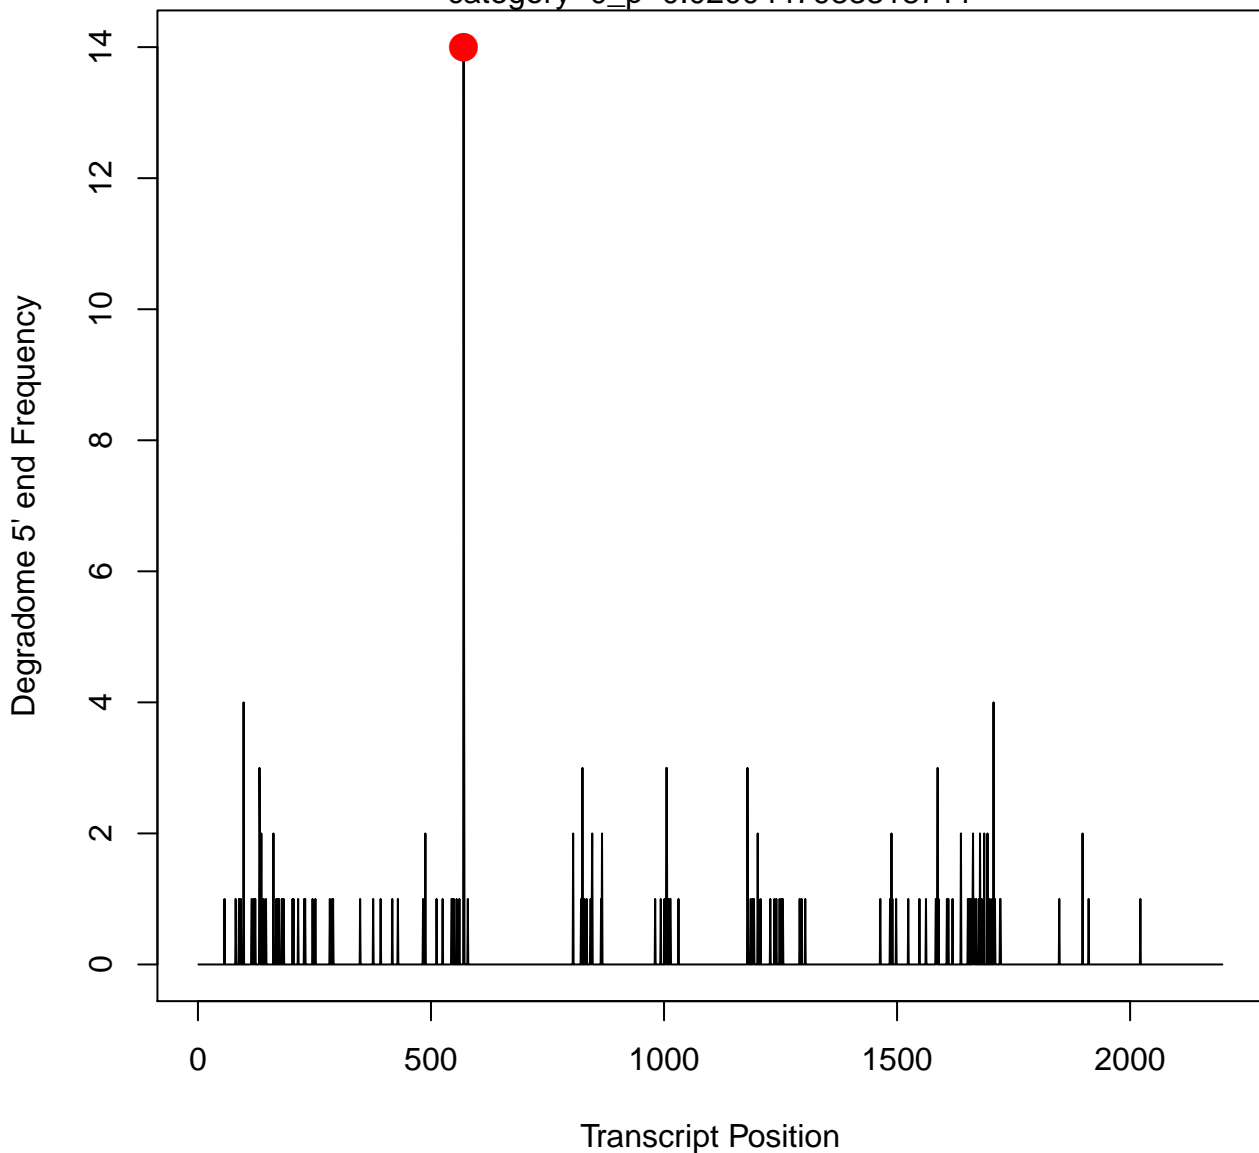

Supplement: s1 [file s1]

**T=Cluster-18410.35488\_Q=novel\_23\_S=1389**

category=0\_p=0.00164041690342198

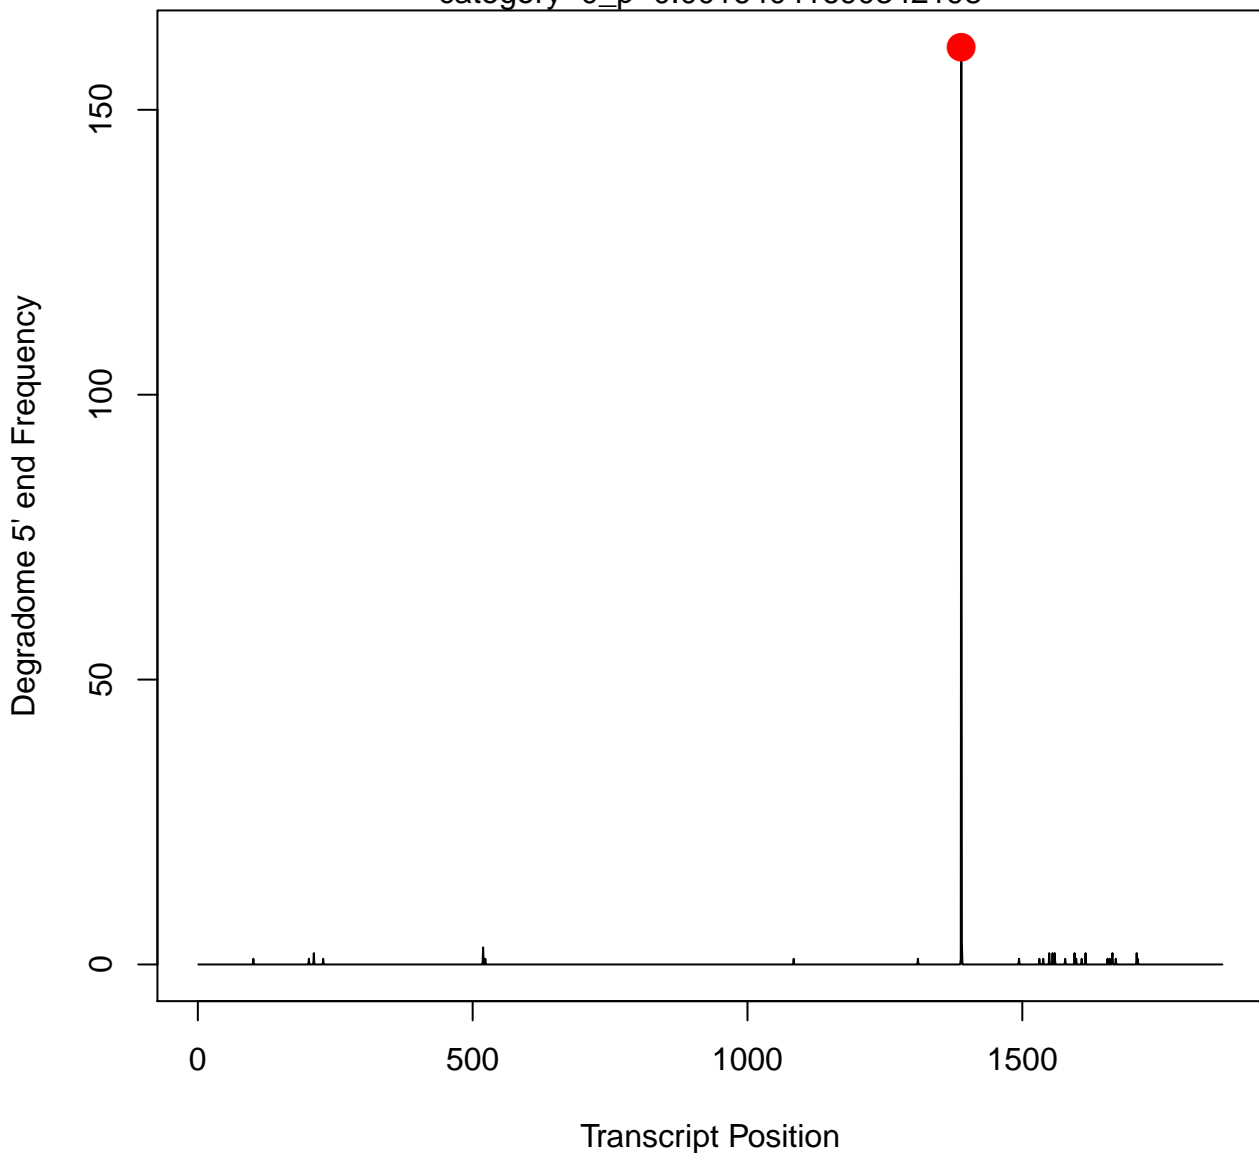

Supplement: s1 [file s1]

**T=Cluster-18410.82978\_Q=novel\_82\_S=258**

category=2\_p=0.0673240995462872

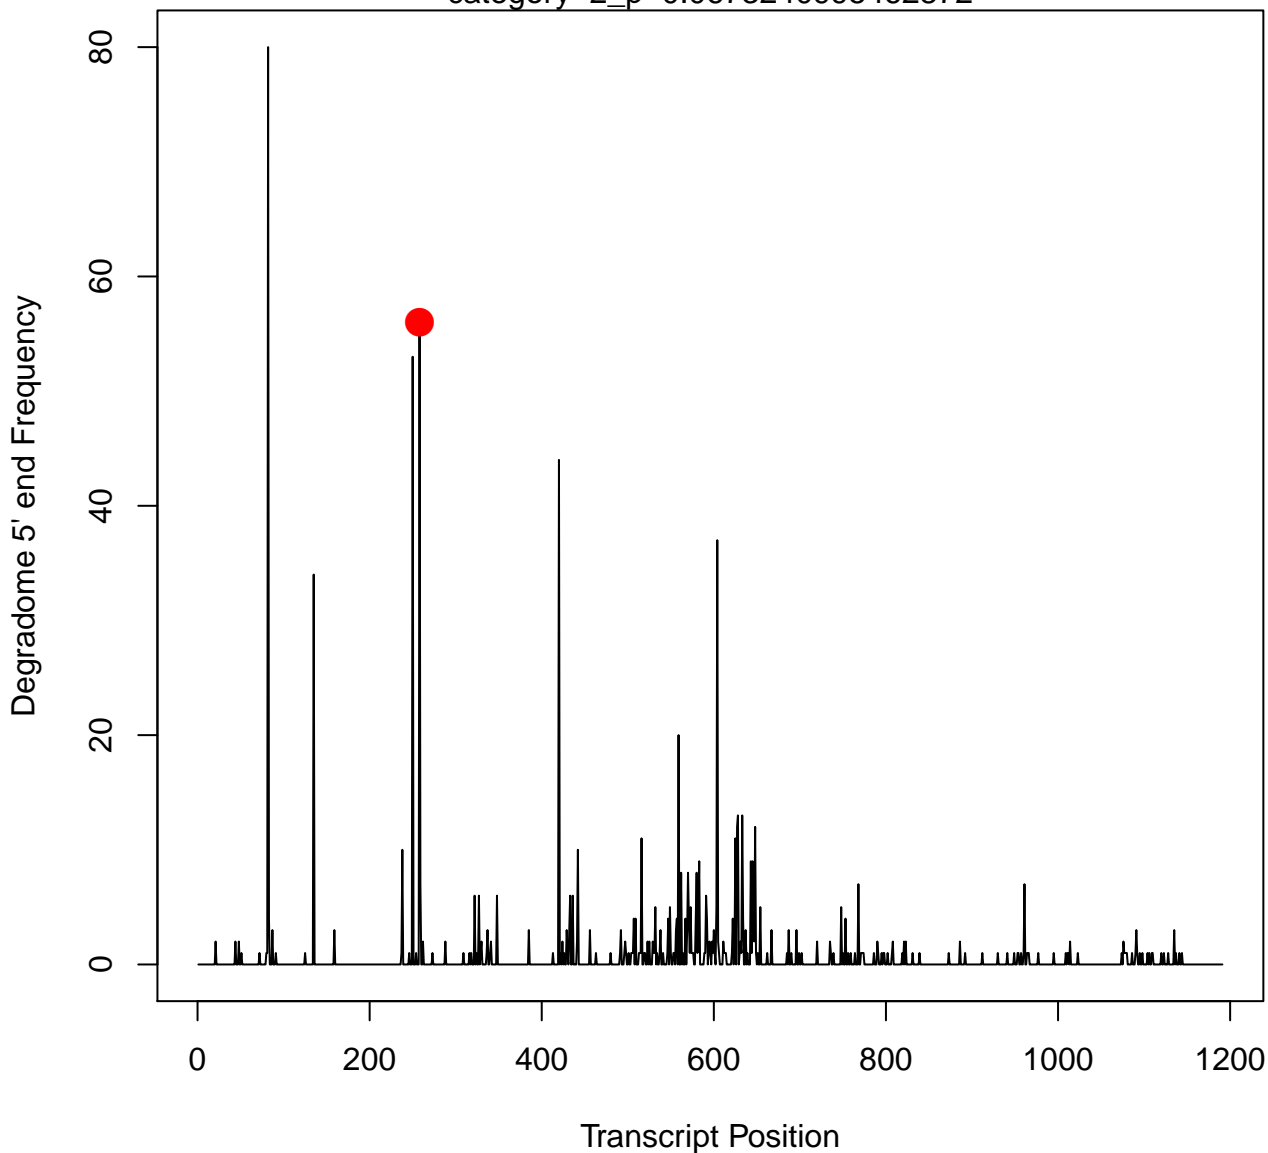

Supplement: s1 [file s1]

**T=Cluster-18410.97427\_Q=novel\_116\_S=231**

category=2\_p=0.0229647072699788

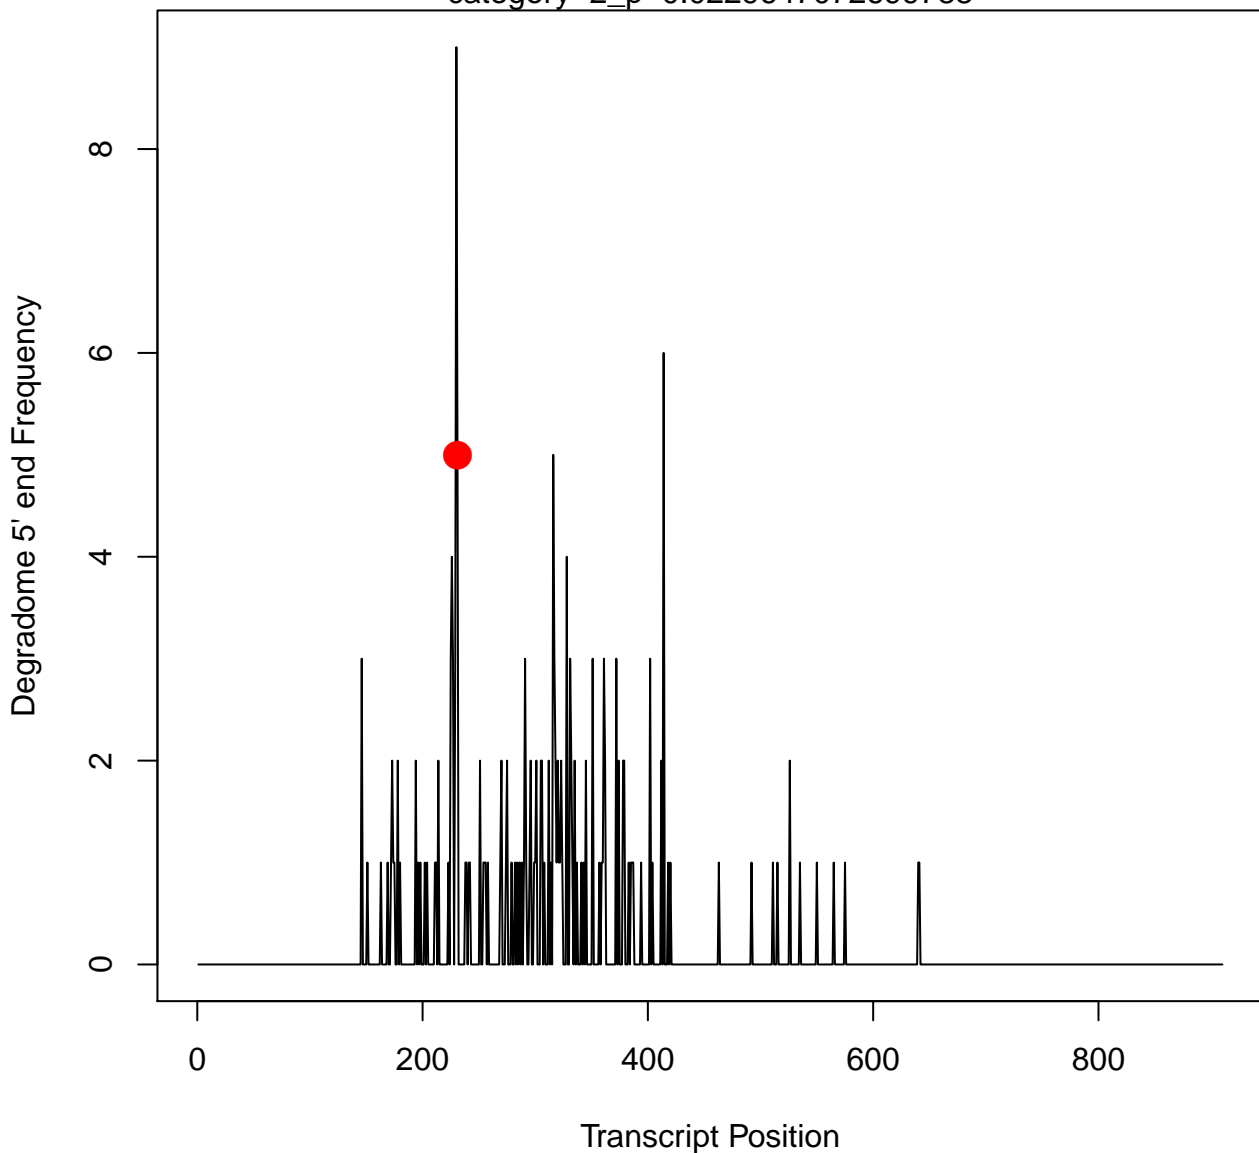

Supplement: s1 [file s1]

**T=Cluster-18410.20165\_Q=novel\_54\_S=51**

category=0\_p=0.028322060664387

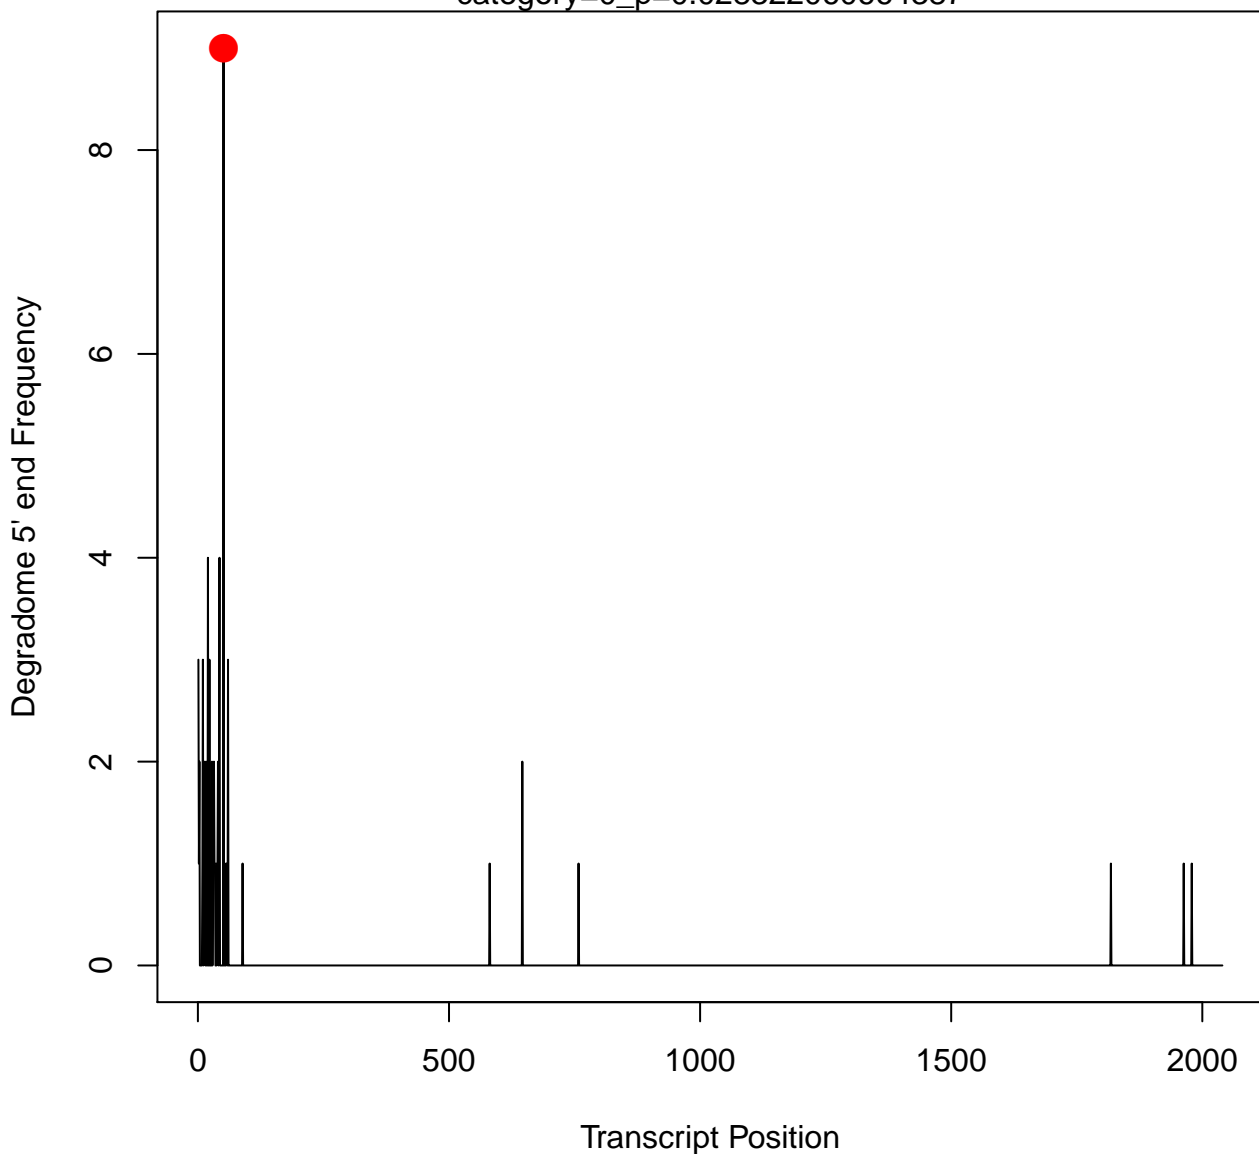

Supplement: s1 [file s1]

**T=Cluster-18410.48111\_Q=novel\_92\_S=1490**

category=0\_p=0.00109391048354923

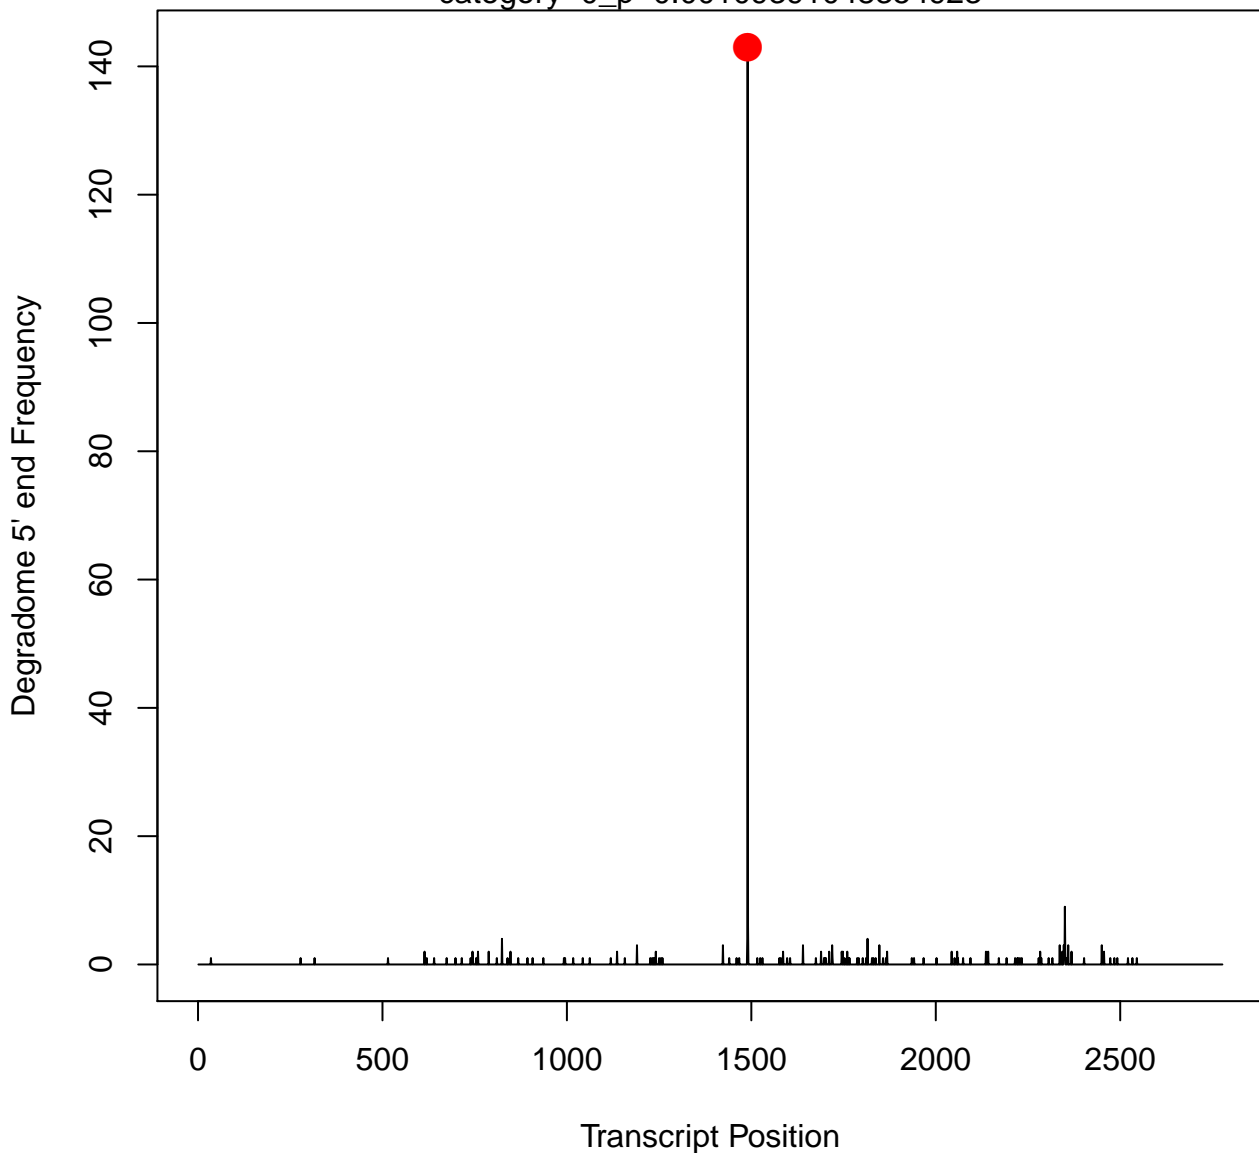

Supplement: s1 [file s1]

**T=Cluster-18410.36325\_Q=novel\_14\_S=1425**

category=0\_p=0.00382345425486719

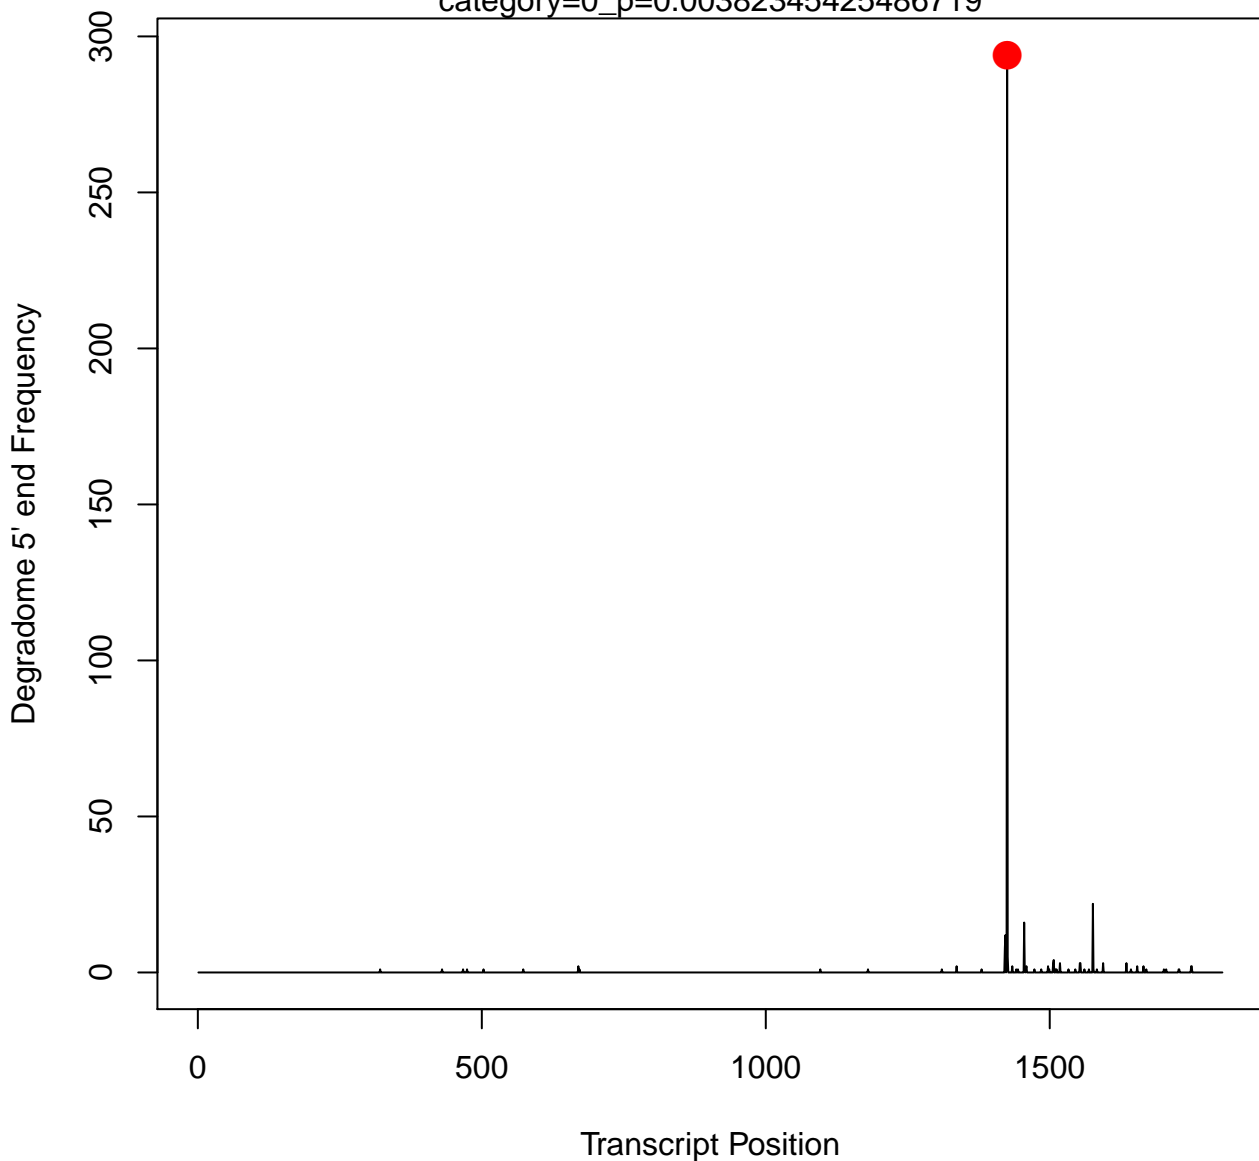

Supplement: s1 [file s1]

**T=Cluster-18410.49960\_Q=novel\_20\_S=1760**

category=0\_p=0.00436846732795781

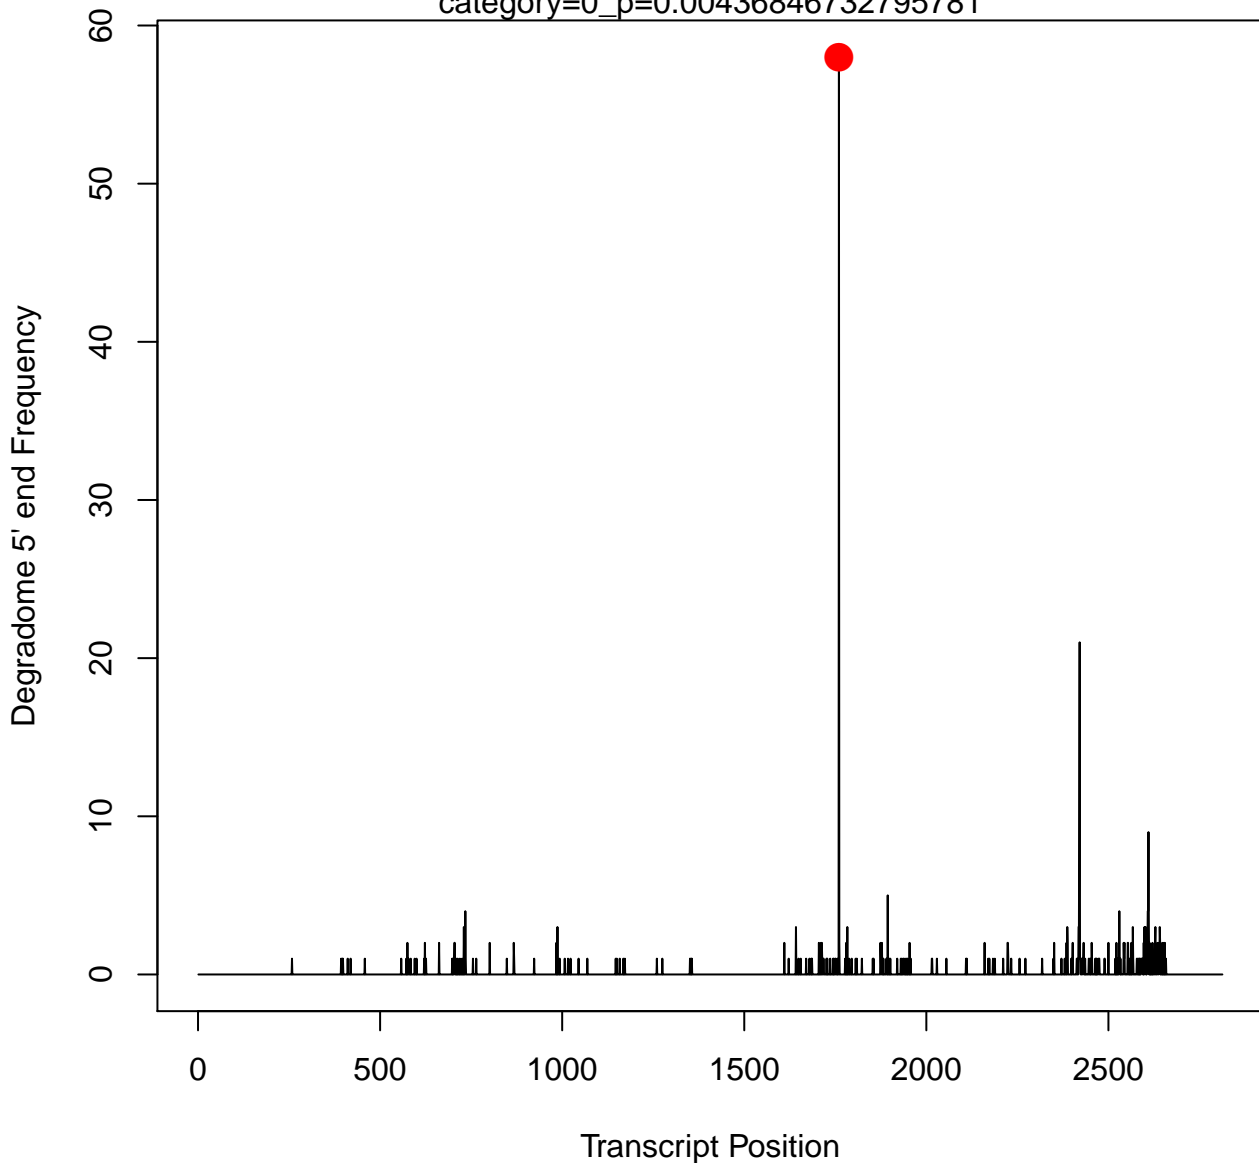

Supplement: s1 [file s1]

**T=Cluster-18410.32388\_Q=novel\_82\_S=347**

category=0\_p=0.0449288017064794

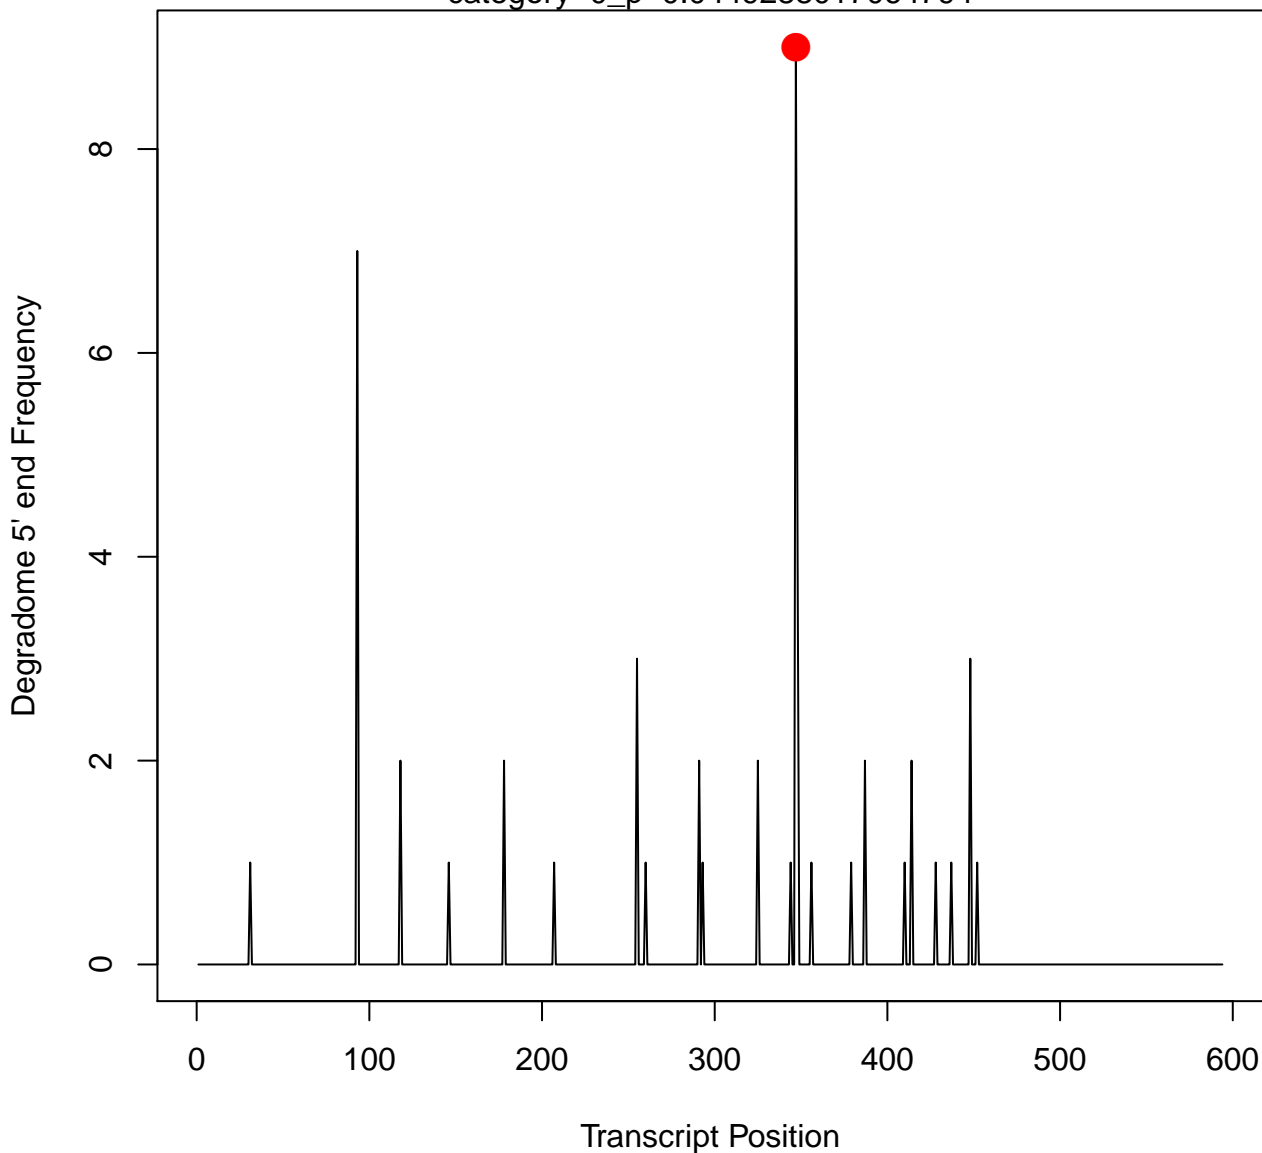

Supplement: s1 [file s1]

**T=Cluster-18410.79892\_Q=novel\_82\_S=38**

category=1\_p=0.0237344565580955

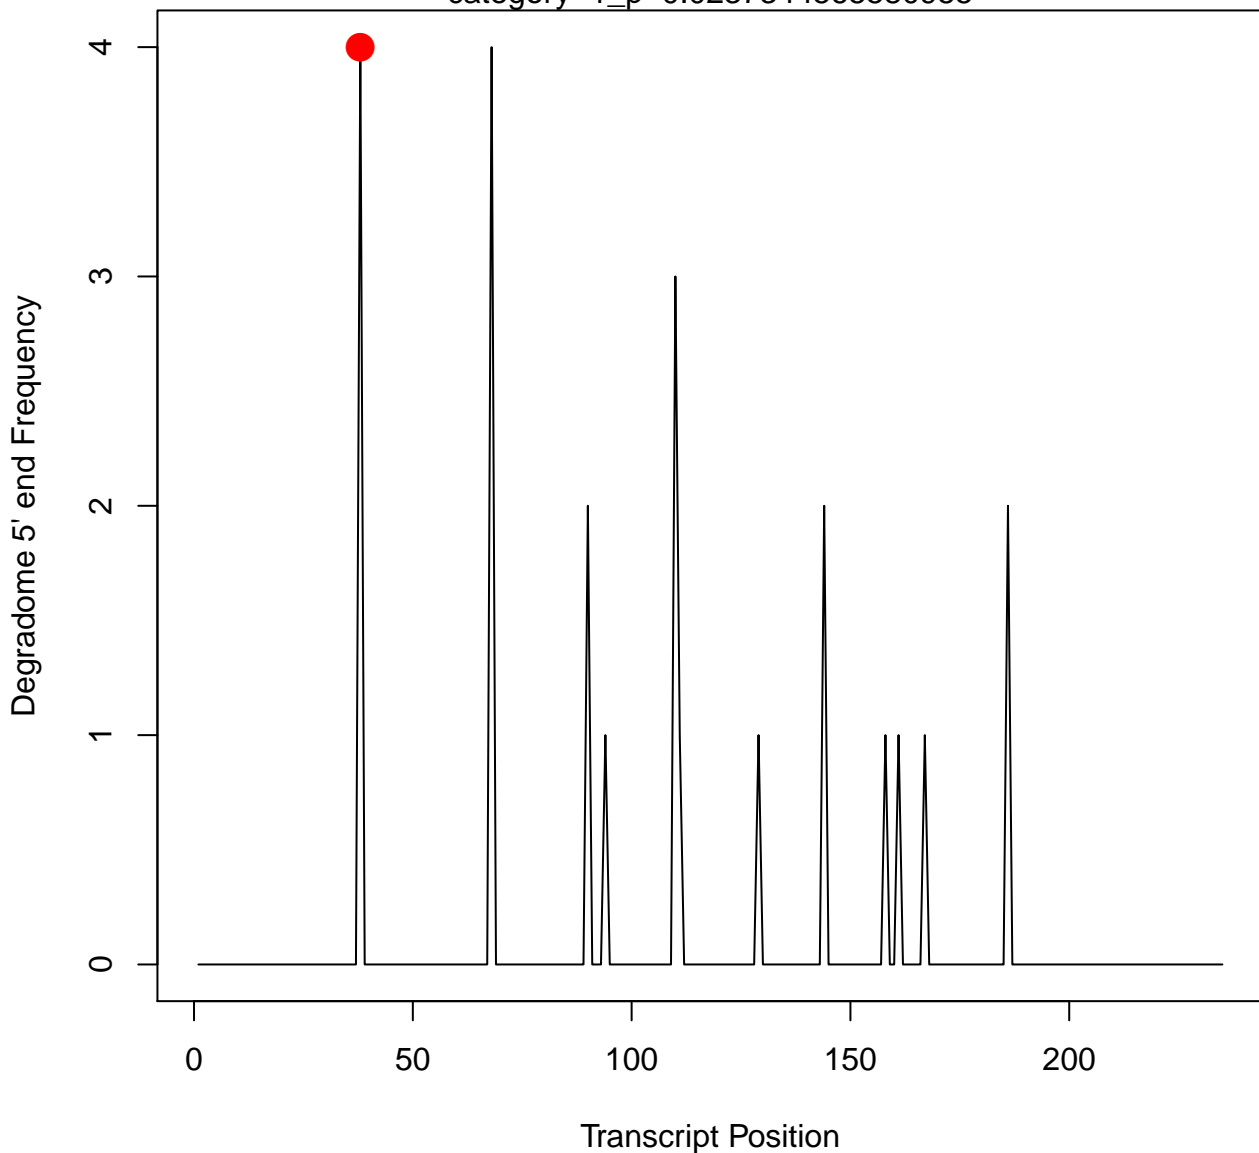

Supplement: s1 [file s1]

**T=Cluster-18410.15298\_Q=novel\_82\_S=525**

category=0\_p=0.0160143951896974

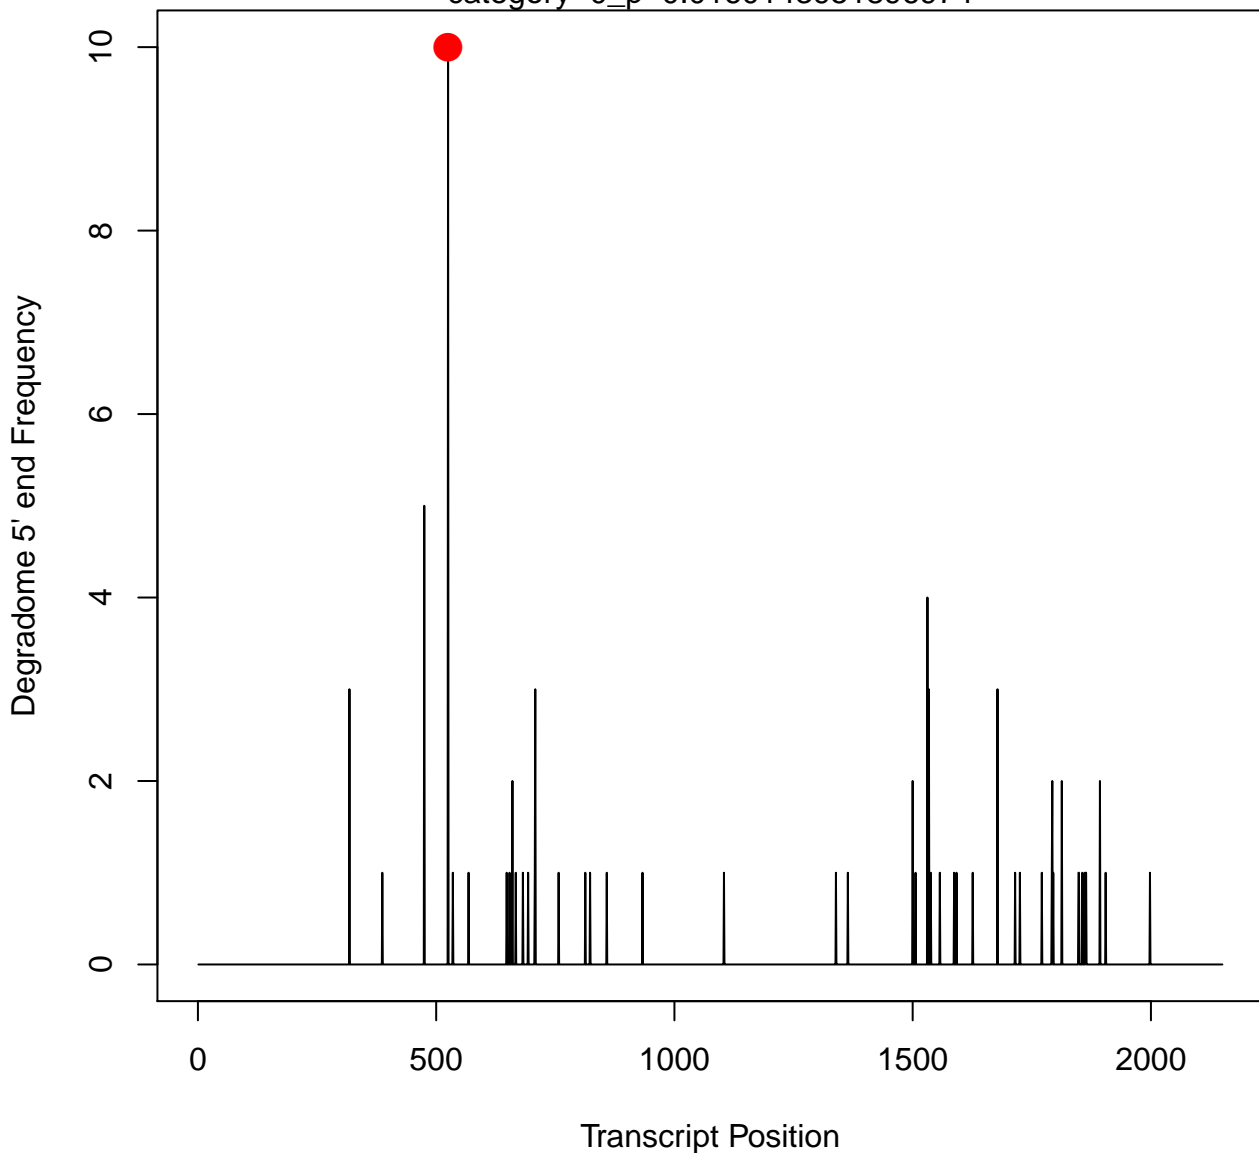

Supplement: s1 [file s1]

**T=Cluster-18410.63996\_Q=novel\_113\_S=924**

category=0\_p=0.00464086203705827

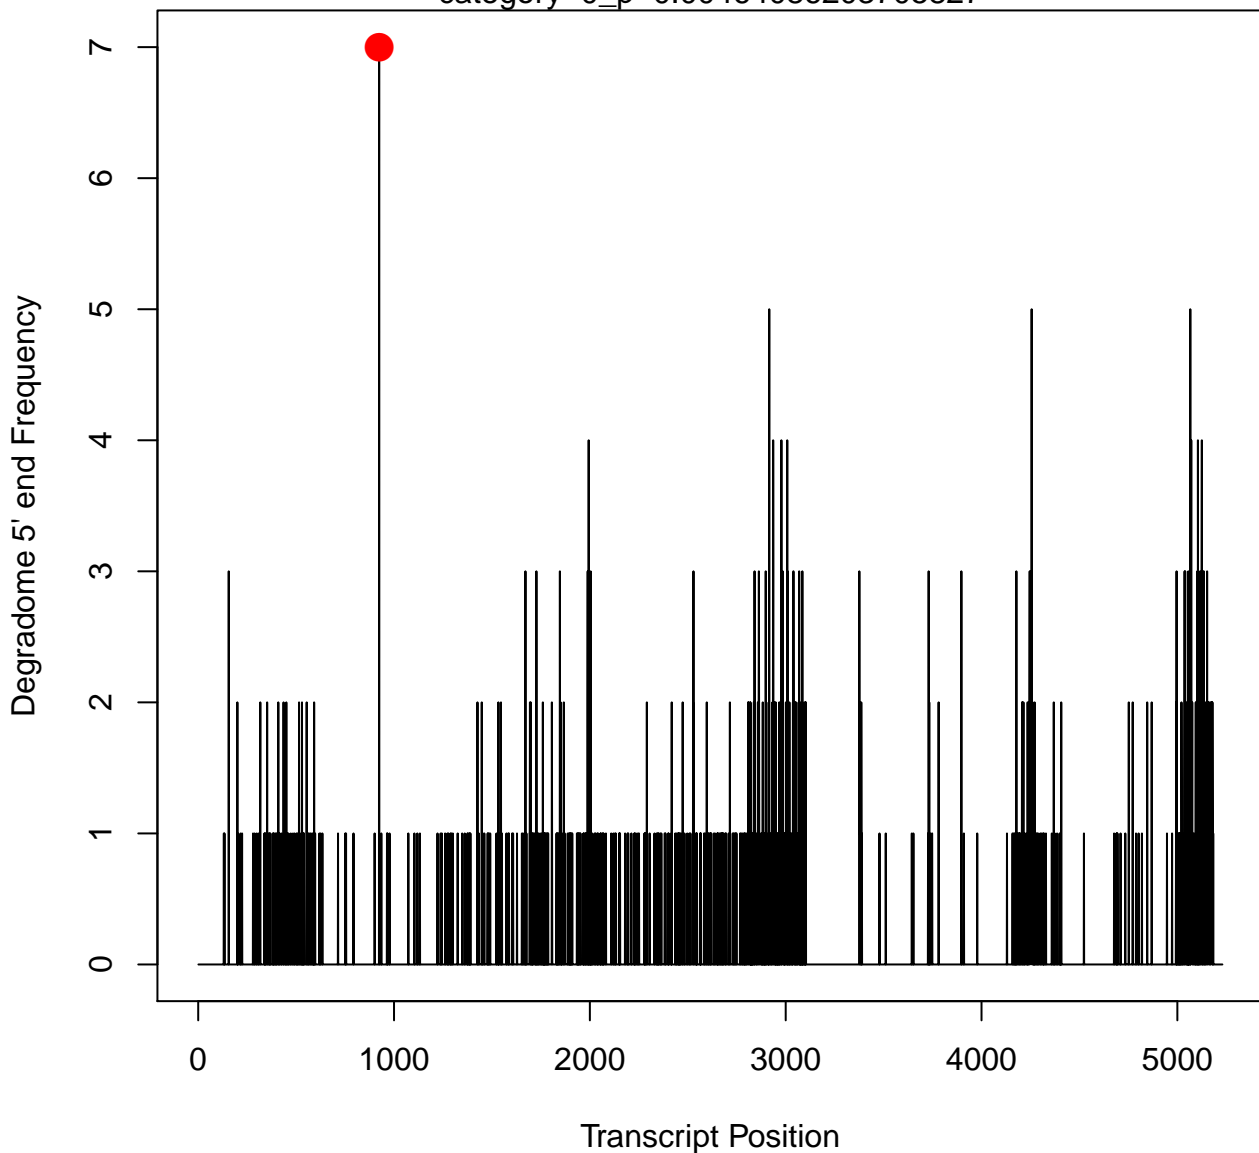

Supplement: s1 [file s1]

**T=Cluster-18410.58646\_Q=novel\_42\_S=58**

category=0\_p=0.0127781409216312

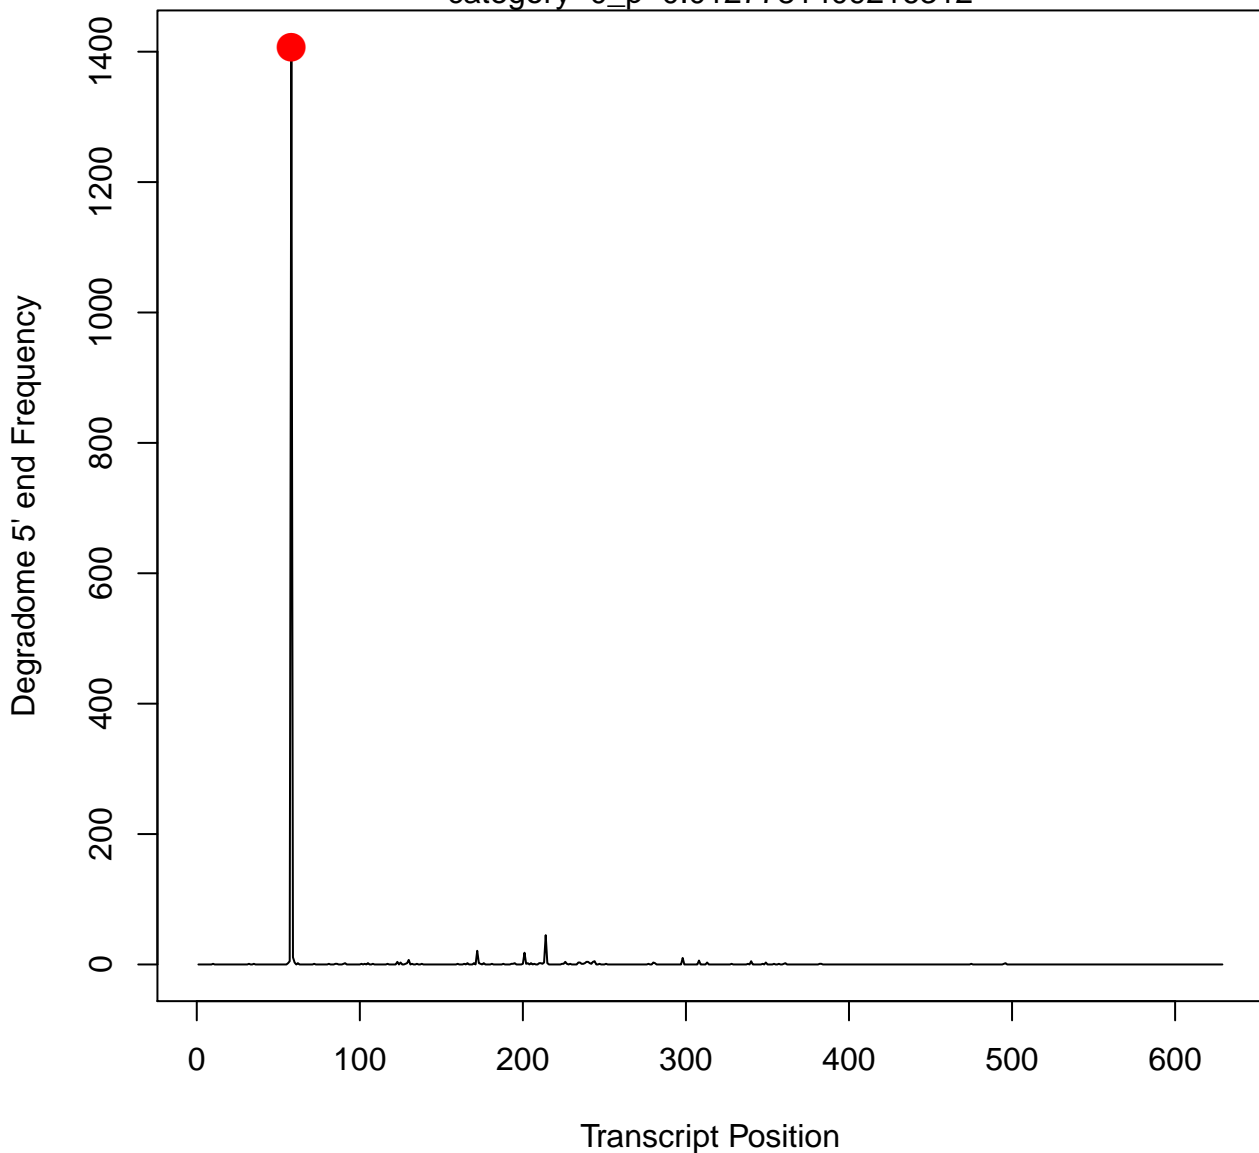

Supplement: s1 [file s1]
