# Supplementary figures and images for: Uncovering miRNA-mRNA Regulatory Modules in Developing Xylem of Pinus massoniana via Small RNA and Degradome Sequencing (part 8 of 9)
Source: MDPI journal article supplement (doi:10.3390/ijms221810154), 2021-09-21

**T=Cluster-18410.10693\_Q=novel\_74\_S=729**

category=0\_p=0.00191355797950399

Degradome 5' end Frequency

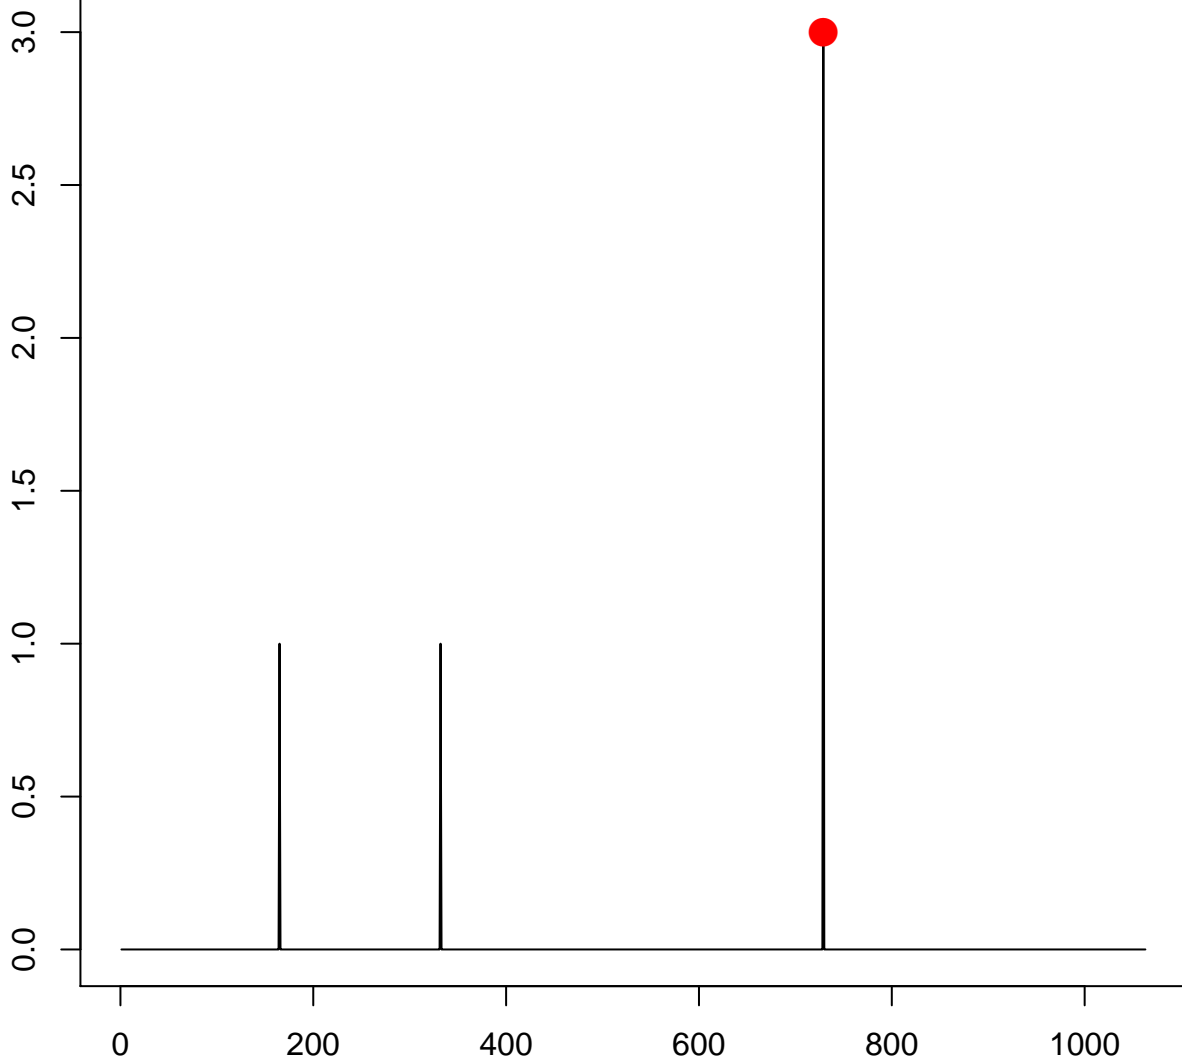

Transcript Position

Supplement: s1 [file s1]

**T=Cluster-18410.19951\_Q=novel\_82\_S=543**

category=0\_p=0.0111560245494552

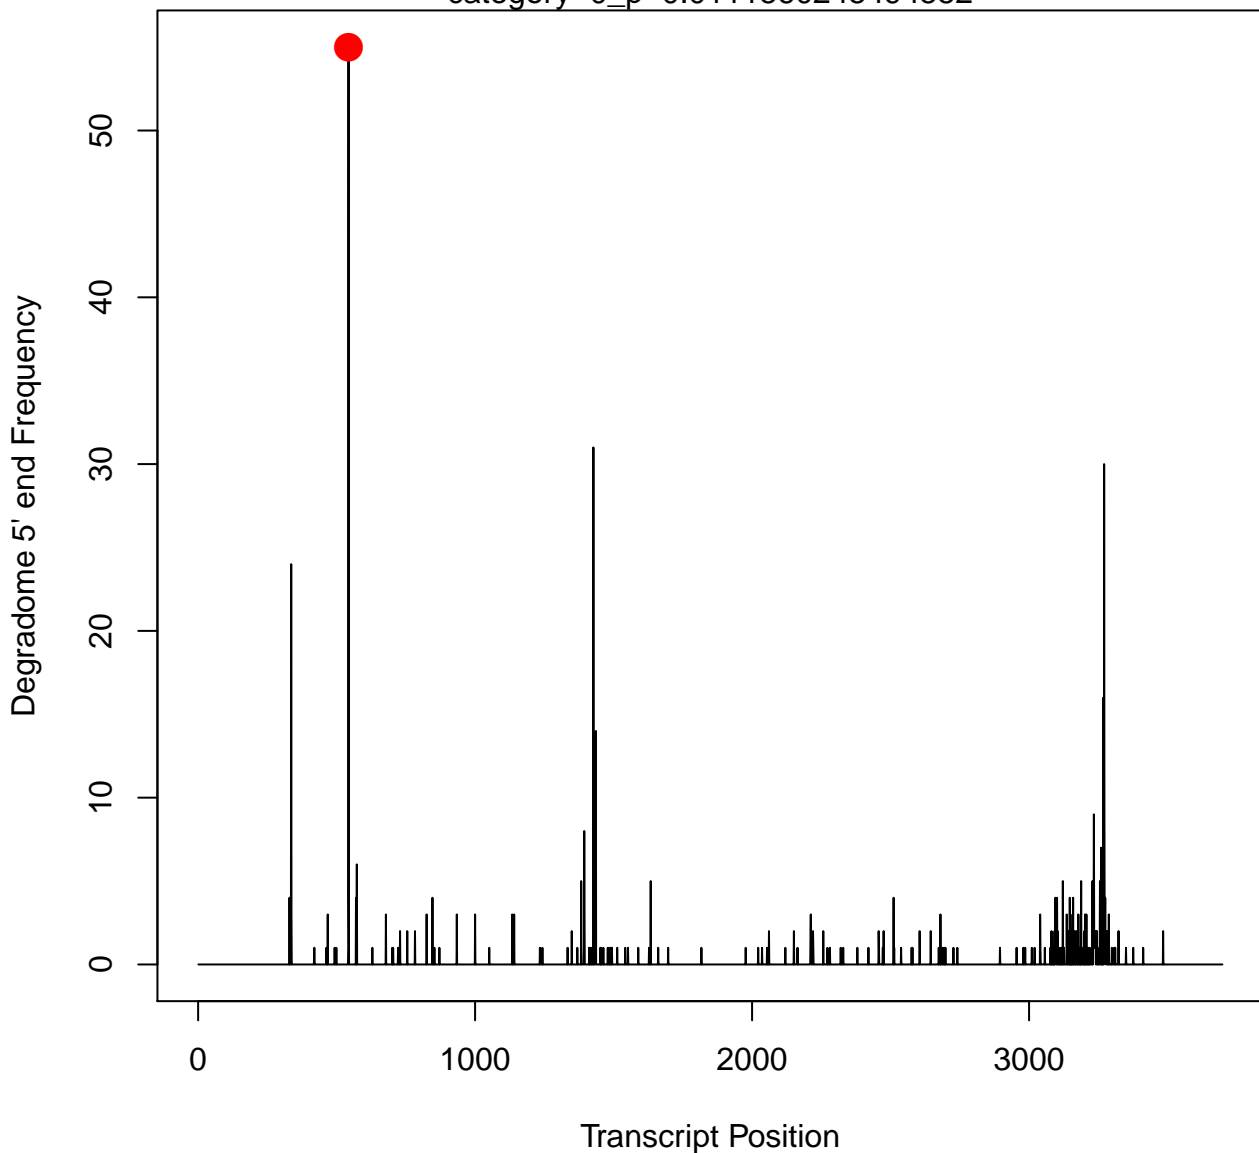

Supplement: s1 [file s1]

**T=Cluster-18410.26941\_Q=novel\_4\_S=1839**

category=4\_p=0.0715786587755043

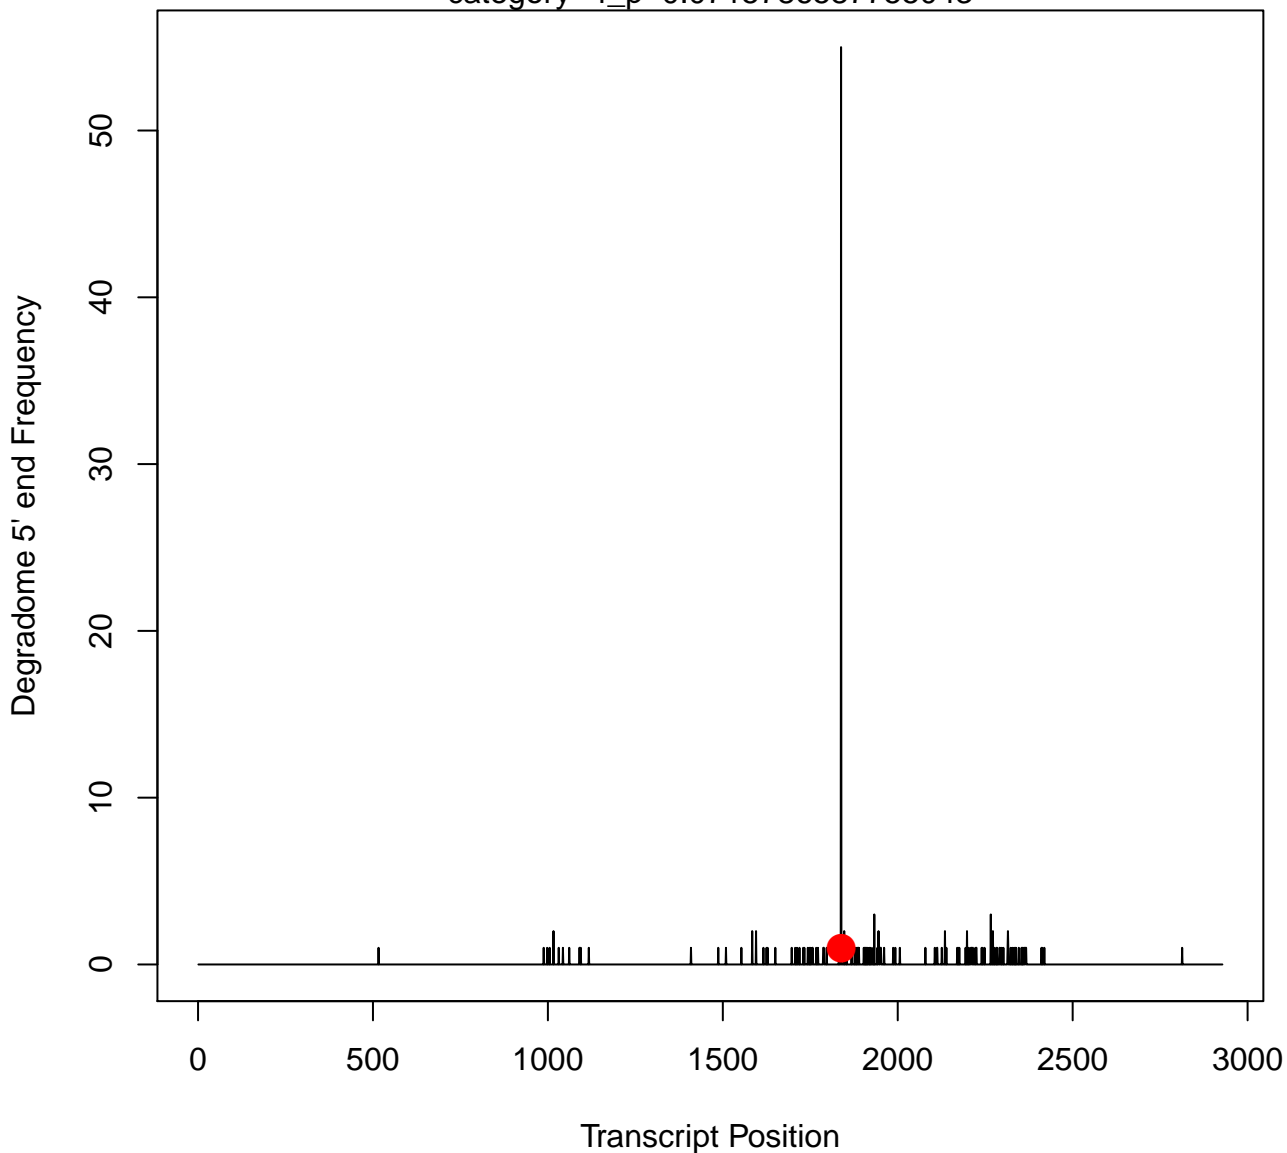

Supplement: s1 [file s1]

**T=Cluster-18410.58342\_Q=novel\_6\_S=685**

category=0\_p=0.00871785114912016

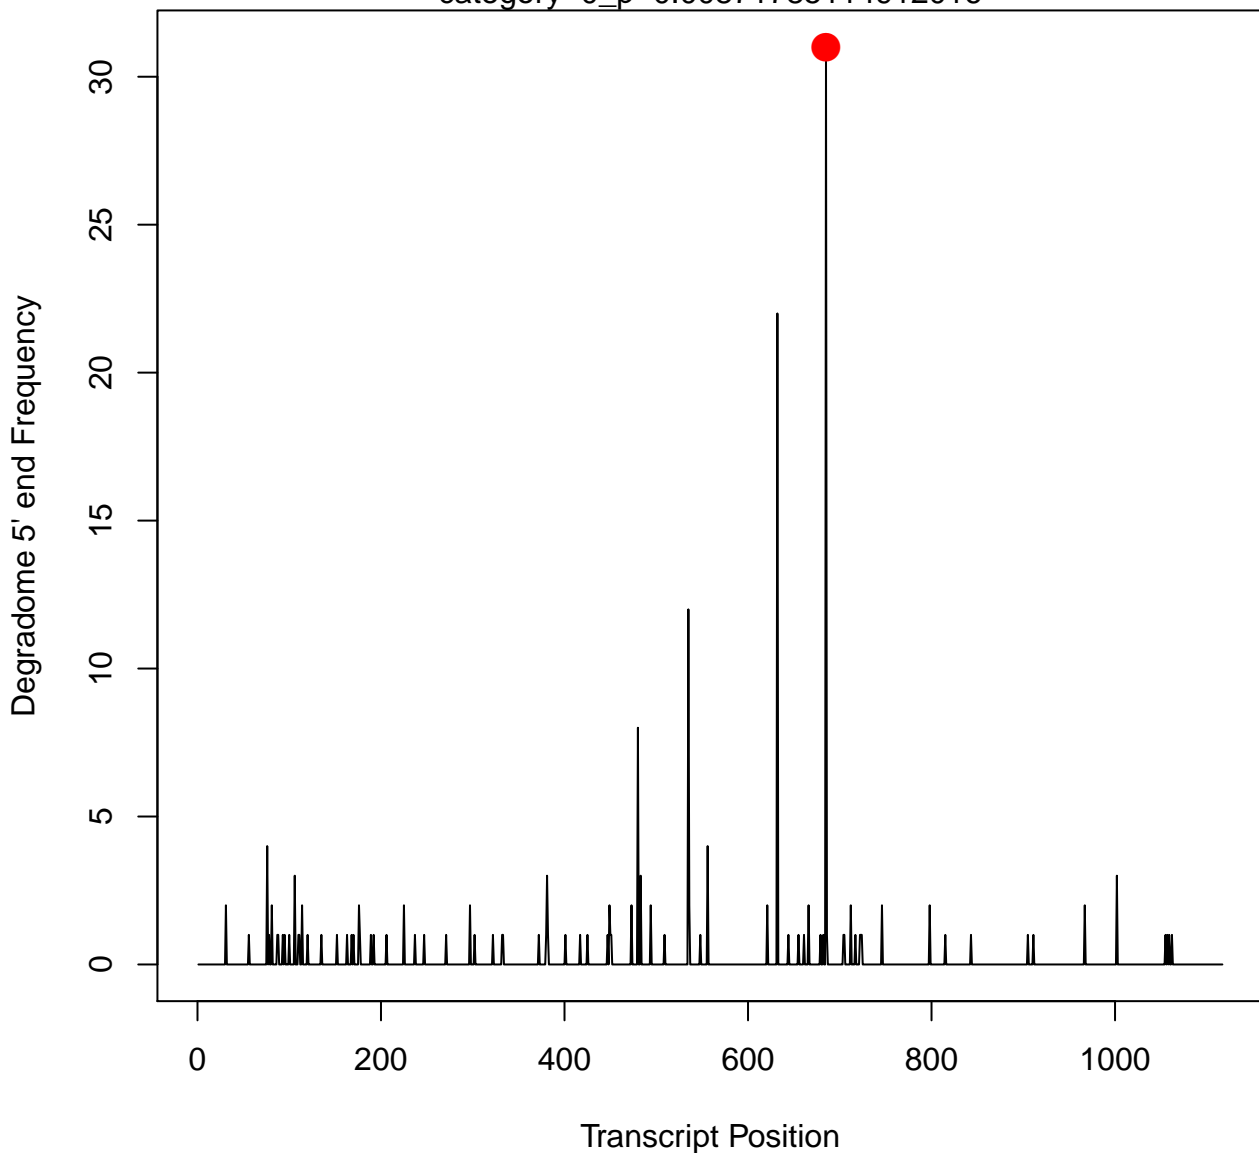

Supplement: s1 [file s1]

**T=Cluster-18818.0\_Q=pma-miR951\_S=343**

category=0\_p=0.0122377313407951

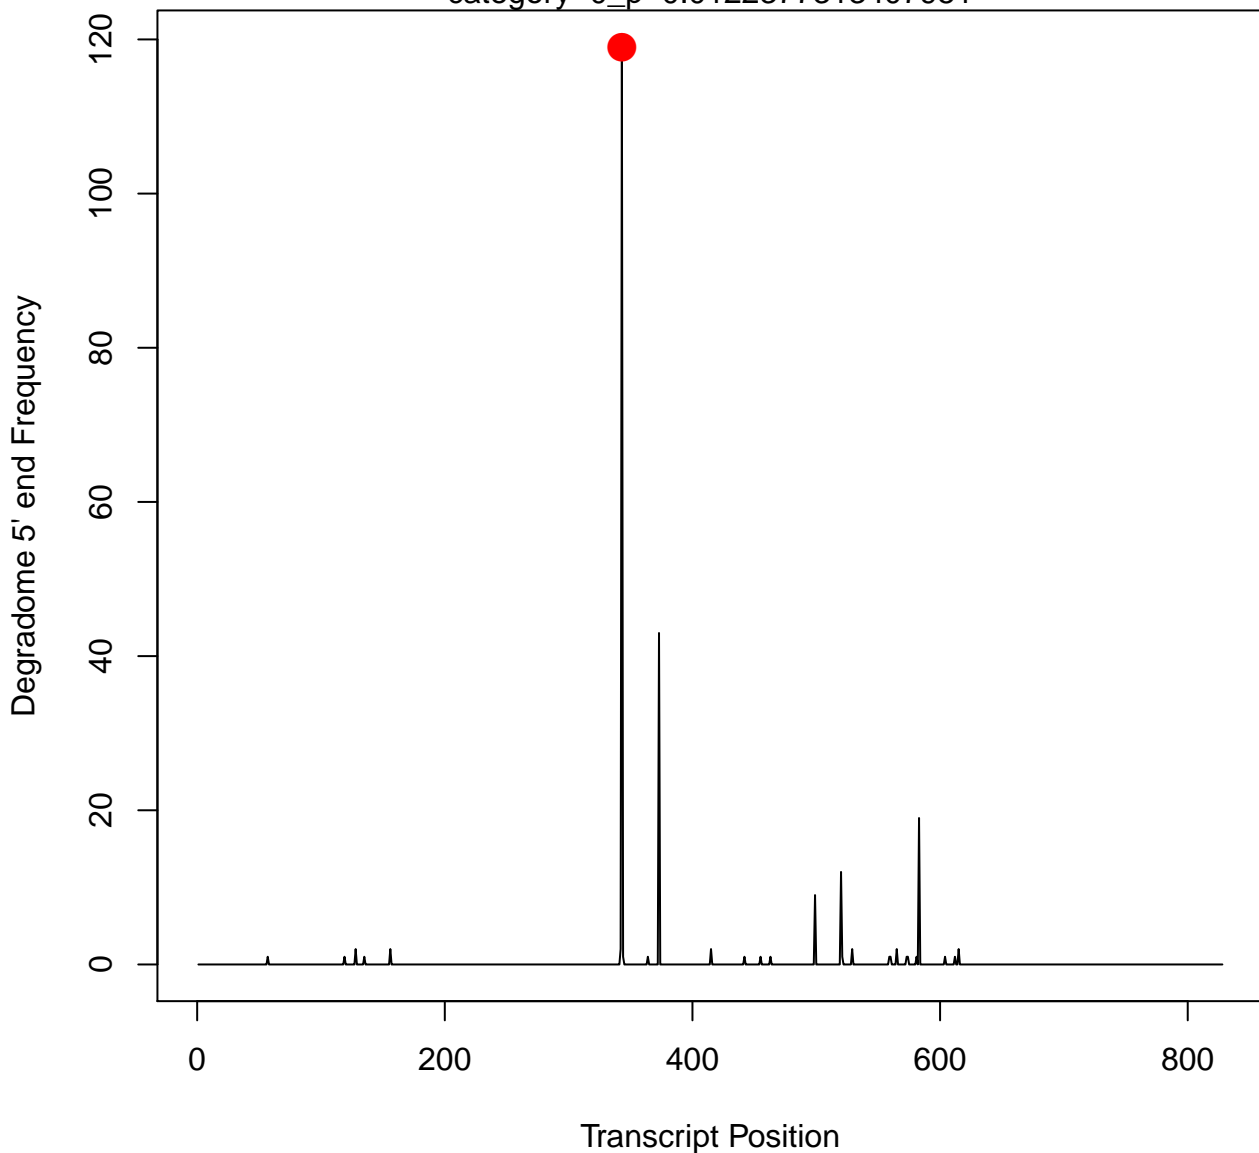

Supplement: s1 [file s1]

**T=Cluster-18410.56575\_Q=novel\_183\_S=318**

category=0\_p=0.00136720107825572

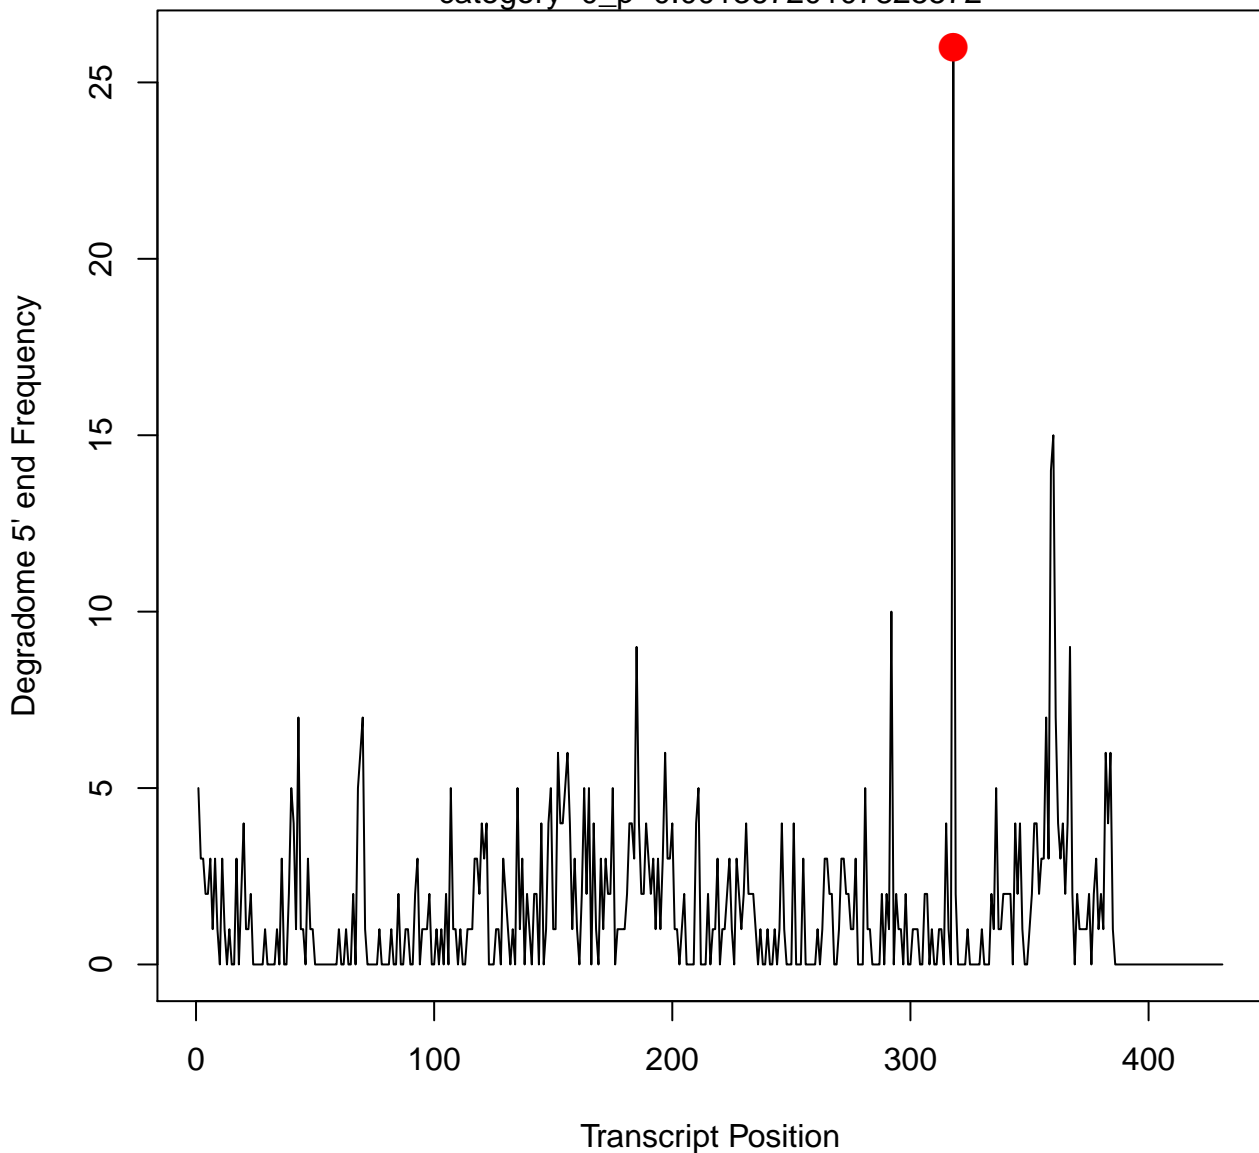

Supplement: s1 [file s1]

**T=Cluster-18410.47272\_Q=novel\_21\_S=162**

category=0\_p=0.00355083585007077

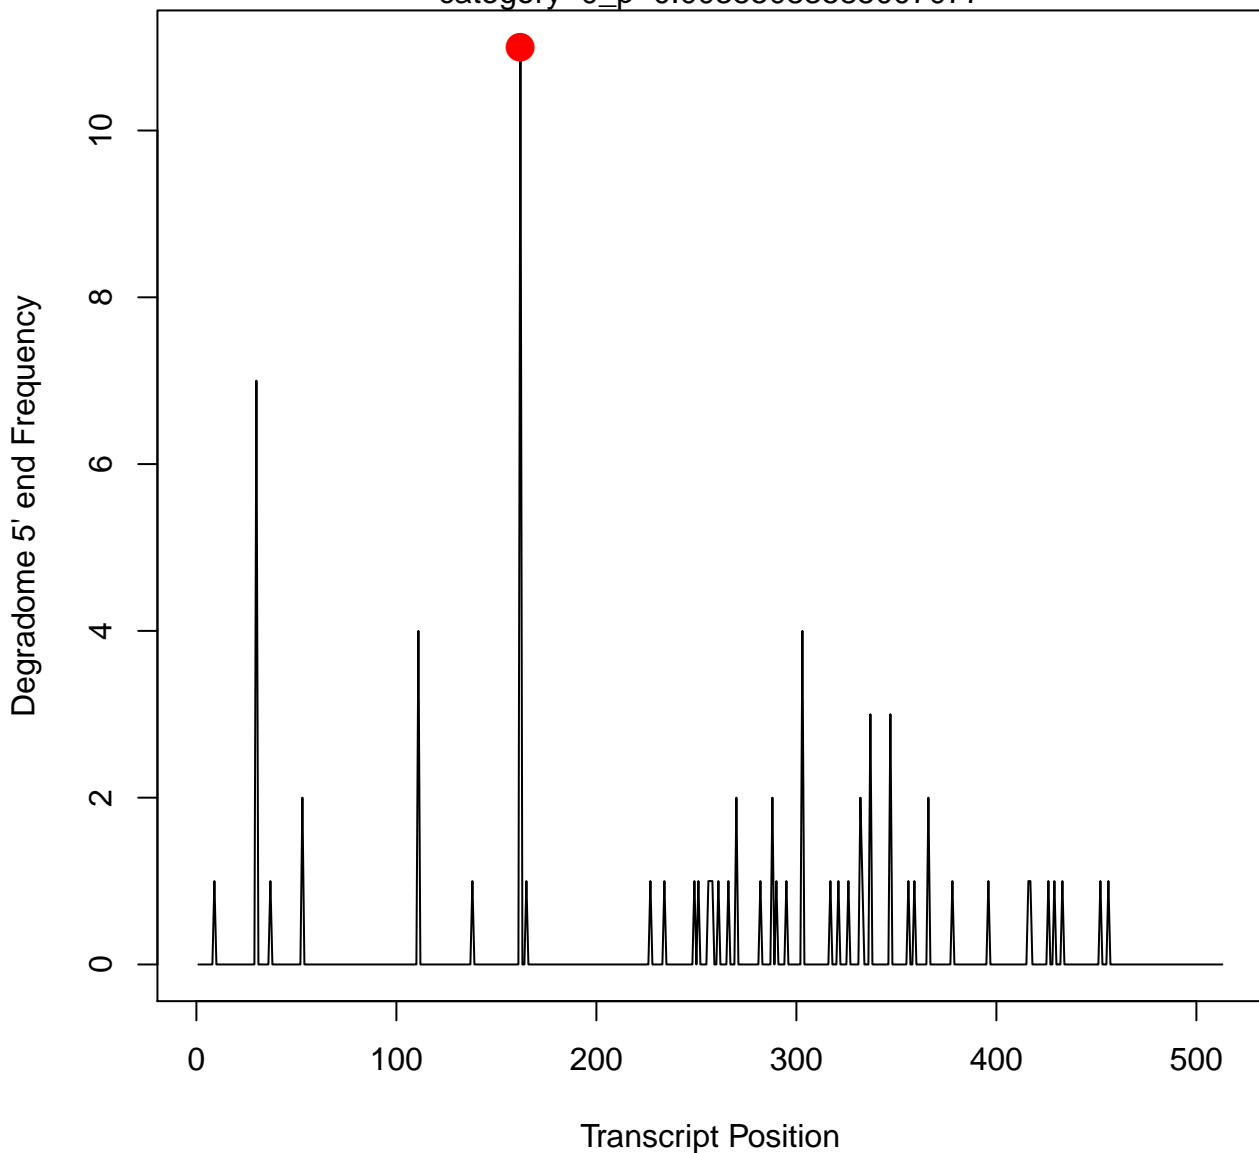

Supplement: s1 [file s1]

**T=Cluster-22533.0\_Q=novel\_32\_S=243**

category=0\_p=0.00491318222172366

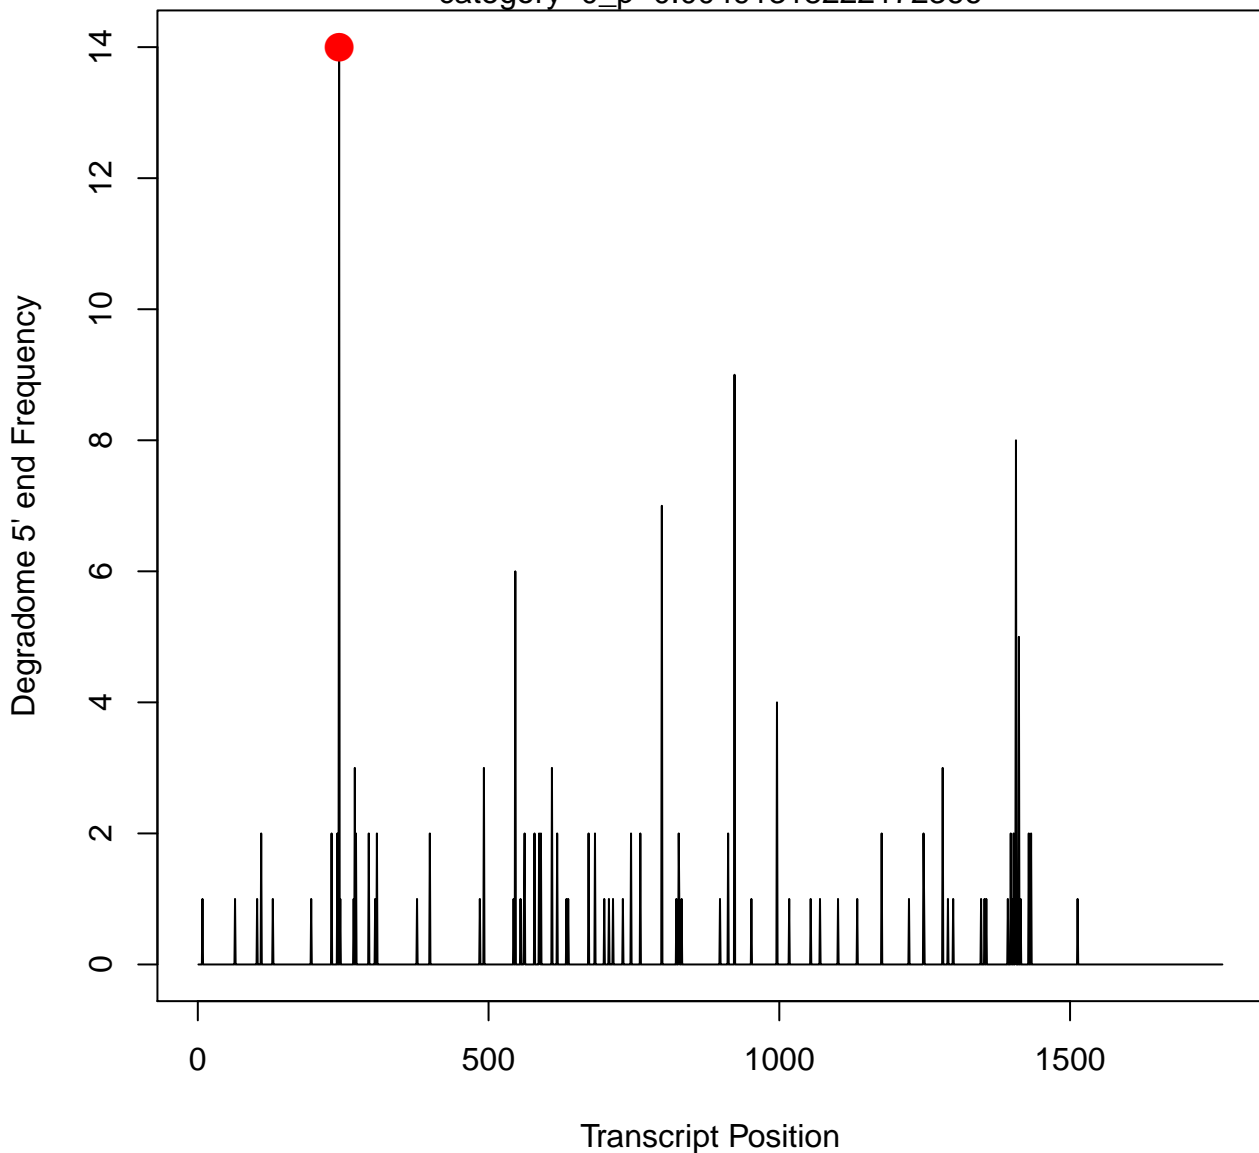

Supplement: s1 [file s1]

**T=Cluster-6417.1\_Q=pma-miR946a-3p\_S=399**

category=0\_p=0.00355083585007077

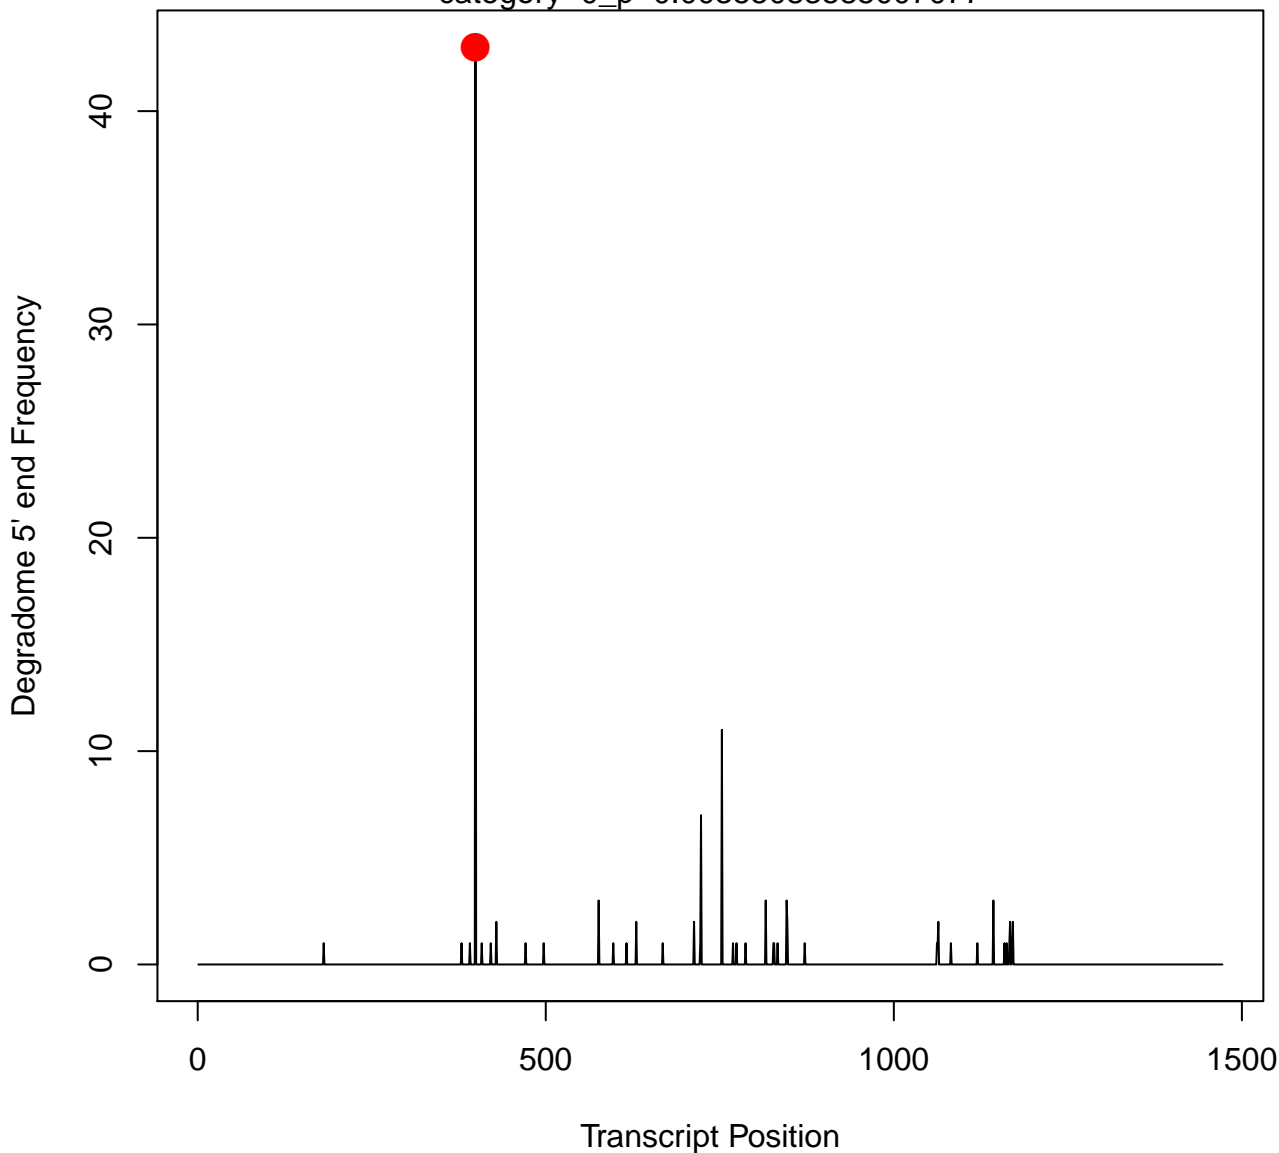

Supplement: s1 [file s1]

**T=Cluster-18410.29532\_Q=novel\_1\_S=364**

category=1\_p=0.0276856212305898

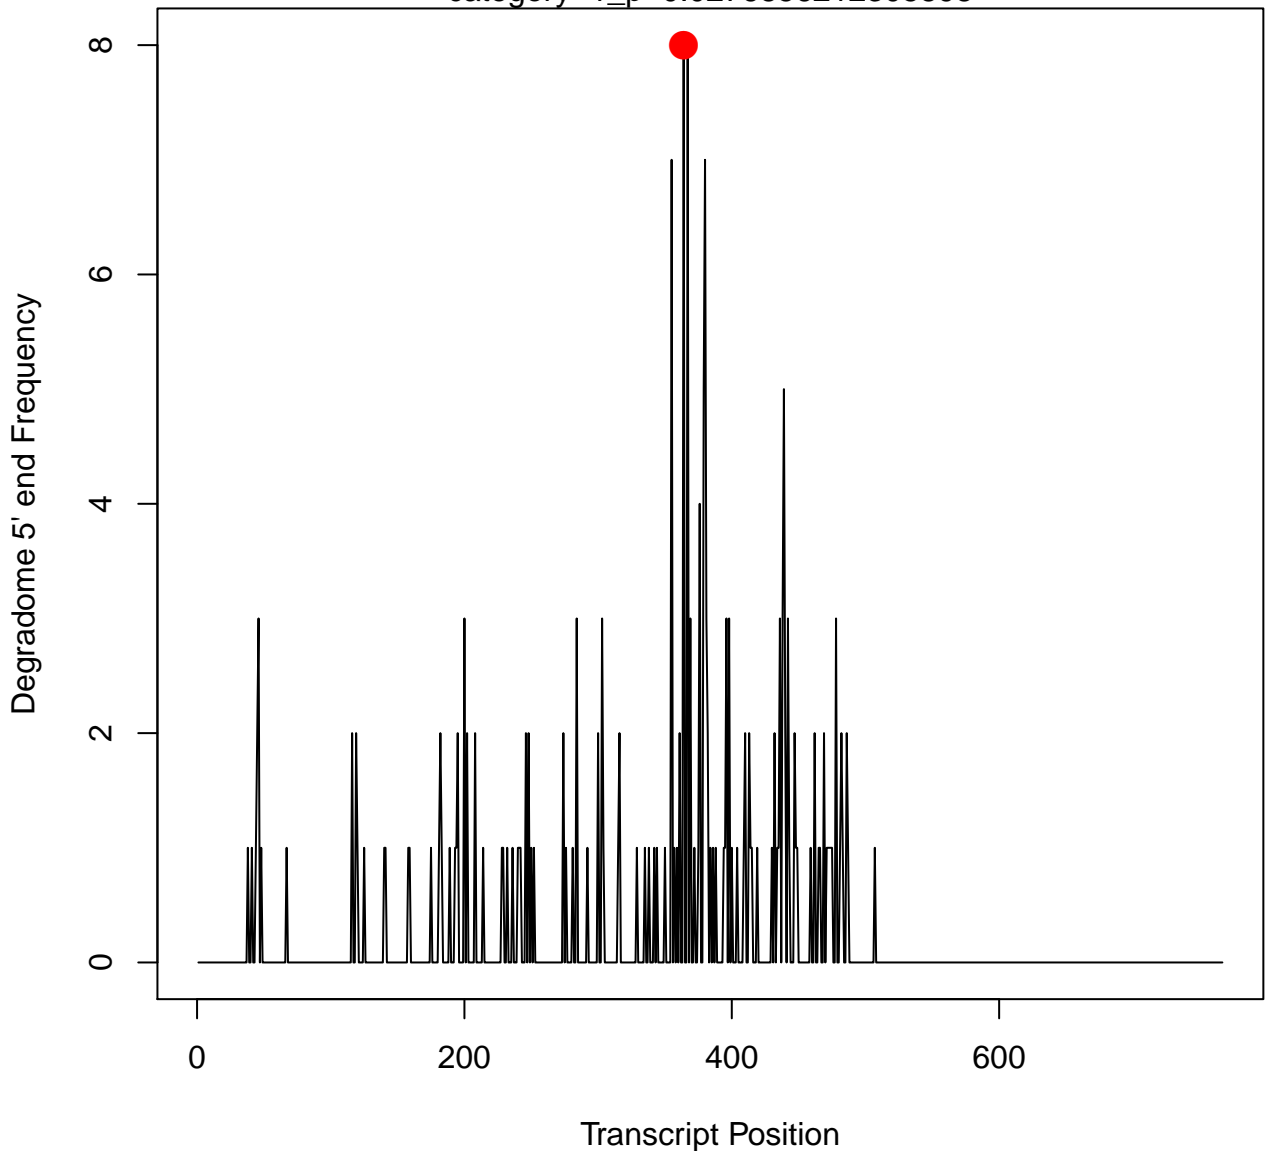

Supplement: s1 [file s1]

**T=Cluster-18410.75899\_Q=novel\_20\_S=1613**

category=0\_p=0.00464086203705827

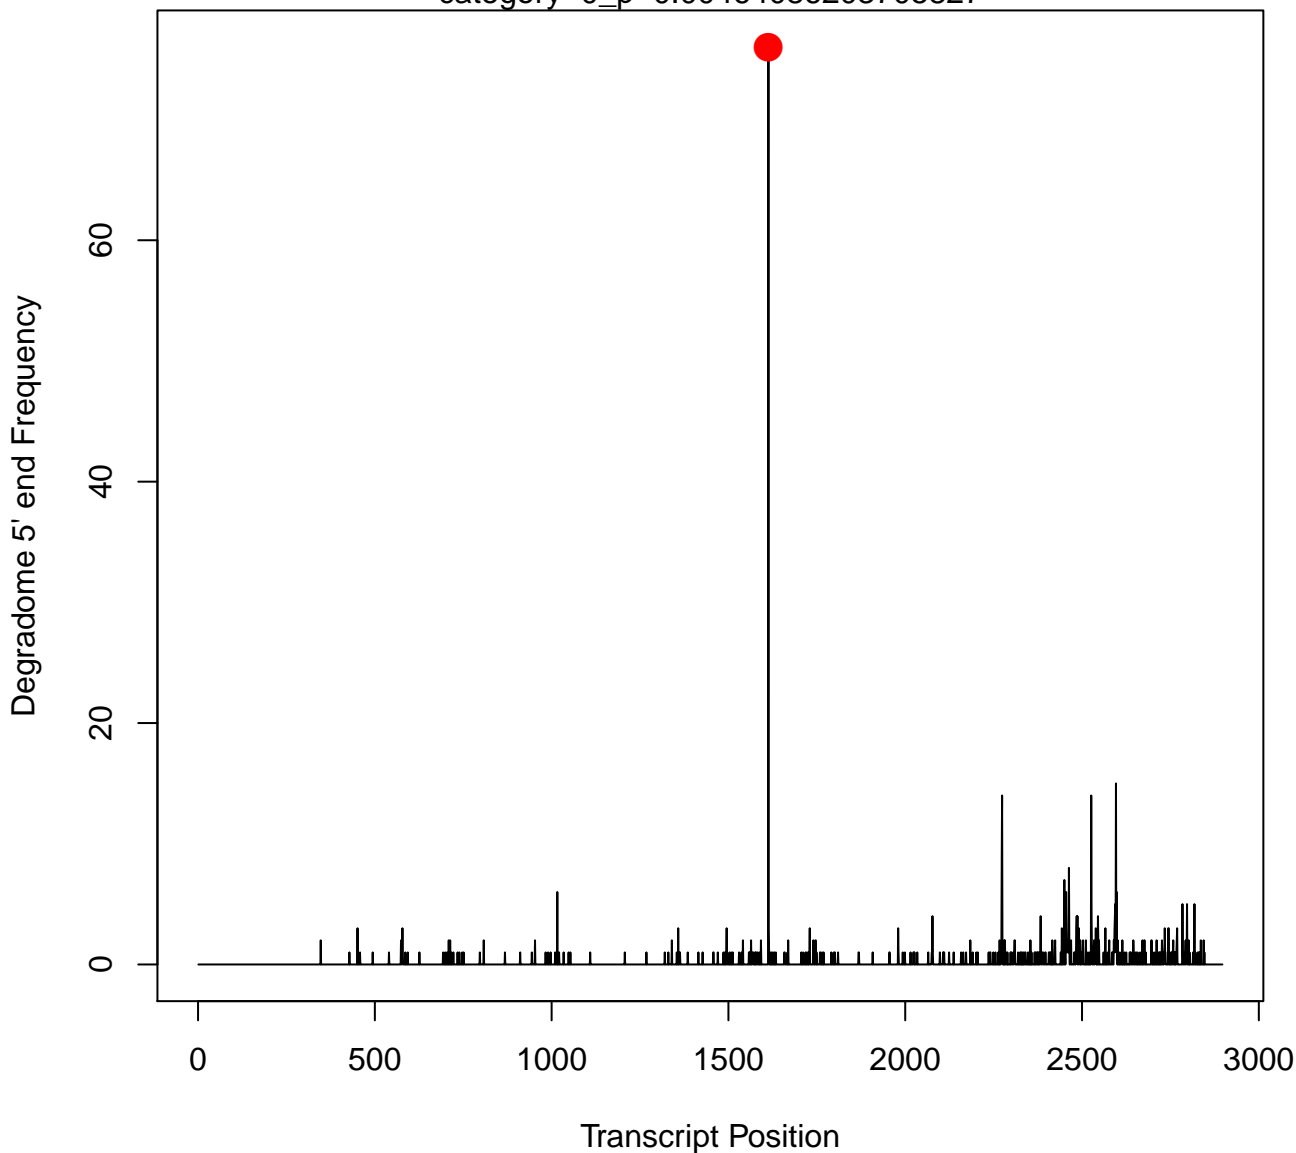

Supplement: s1 [file s1]

**T=Cluster-18410.82083\_Q=novel\_14\_S=151**

category=0\_p=0.0386361567369262

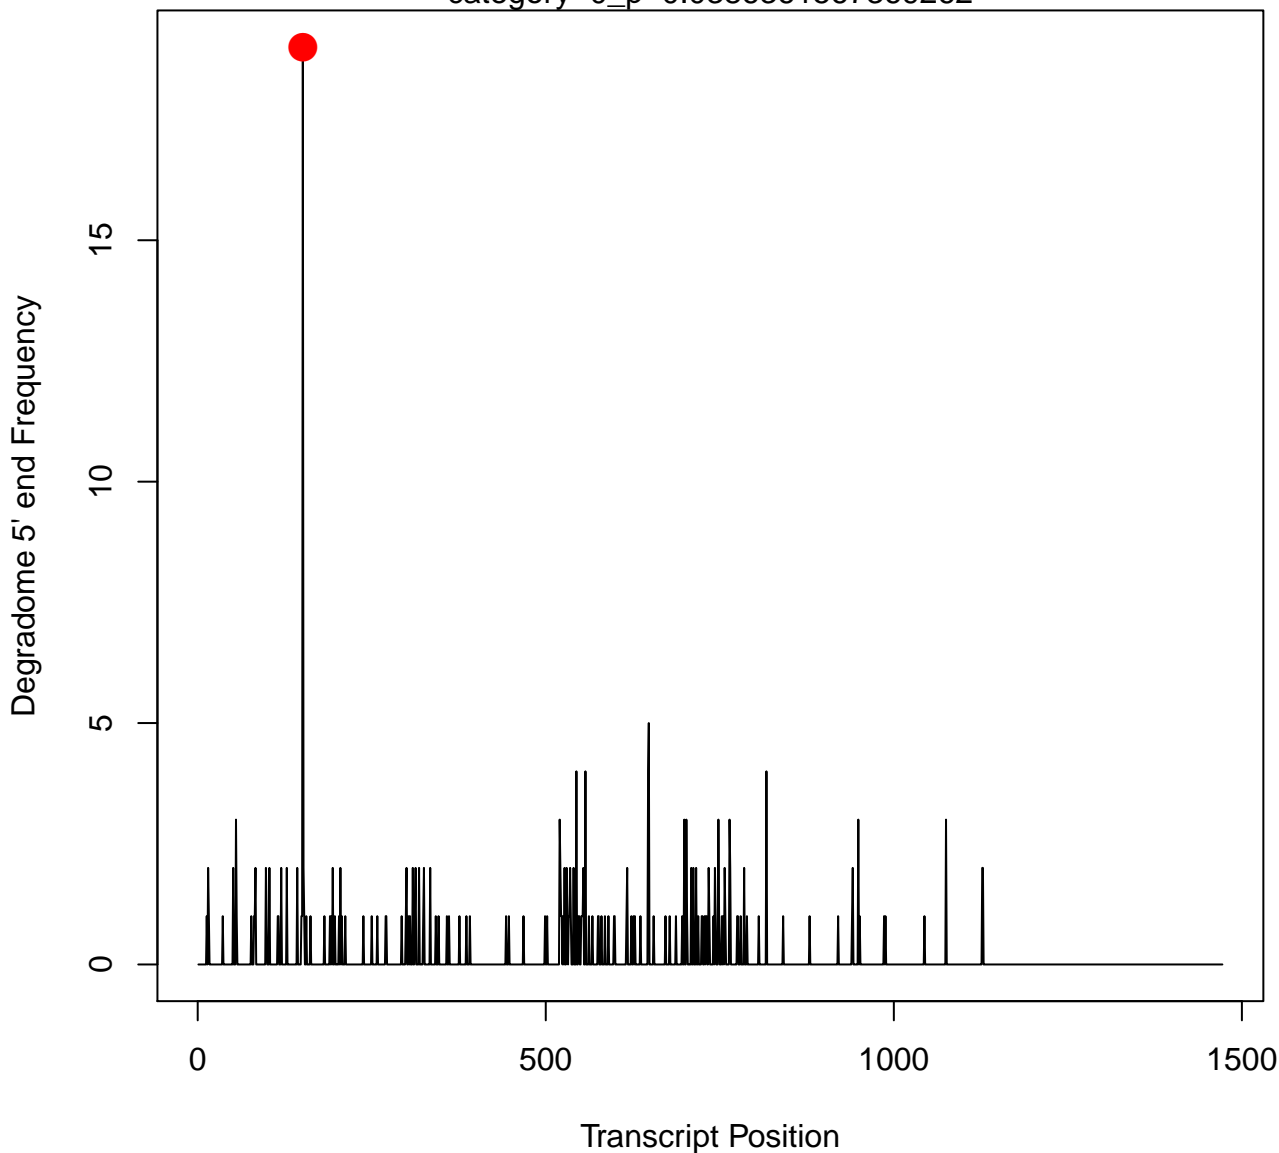

Supplement: s1 [file s1]

**T=Cluster-18410.90022\_Q=novel\_34\_S=1631**

category=0\_p=0.0173597013695821

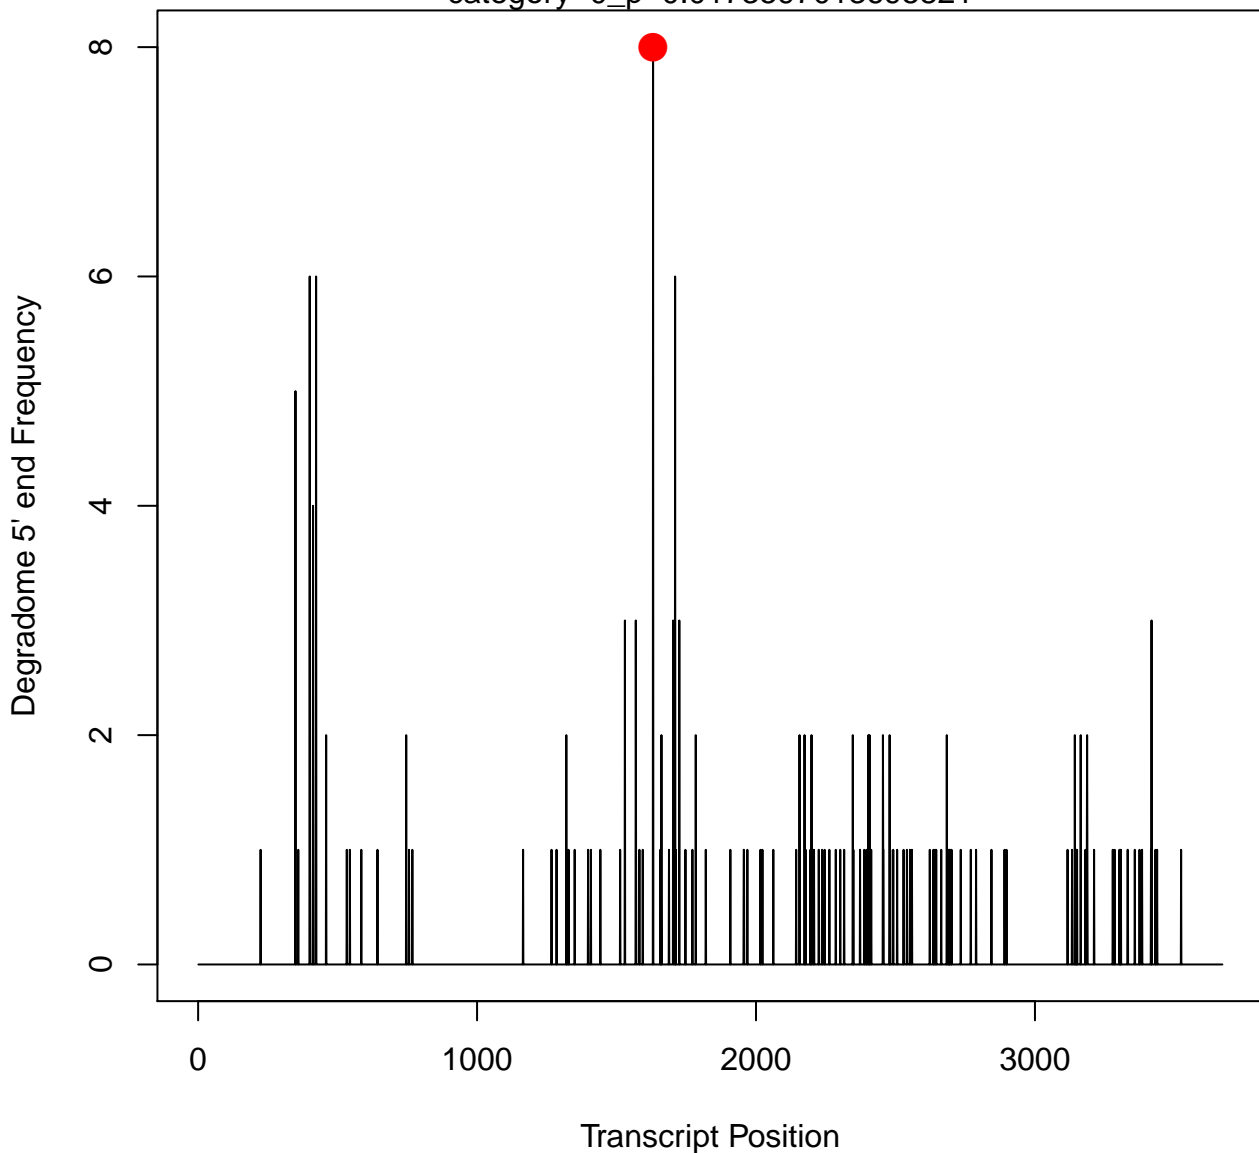

Supplement: s1 [file s1]

**T=Cluster-18410.76988\_Q=novel\_148\_S=232**

category=0\_p=0.0125079730989179

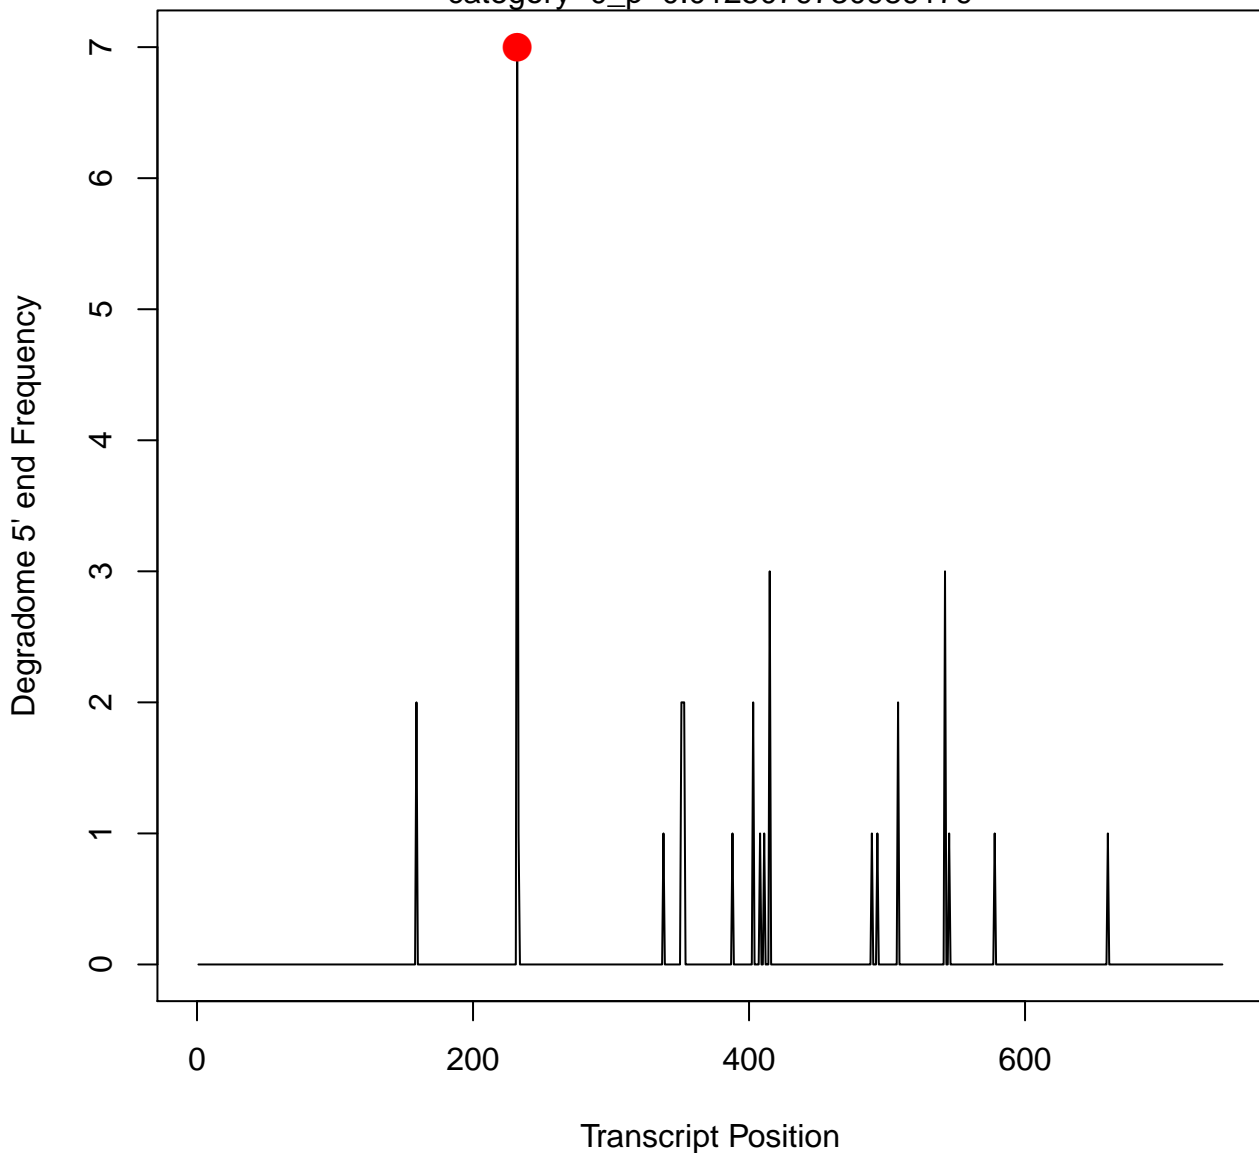

Supplement: s1 [file s1]

**T=Cluster-18410.83608\_Q=pma-miR951\_S=287**

category=0\_p=0.0219199994275796

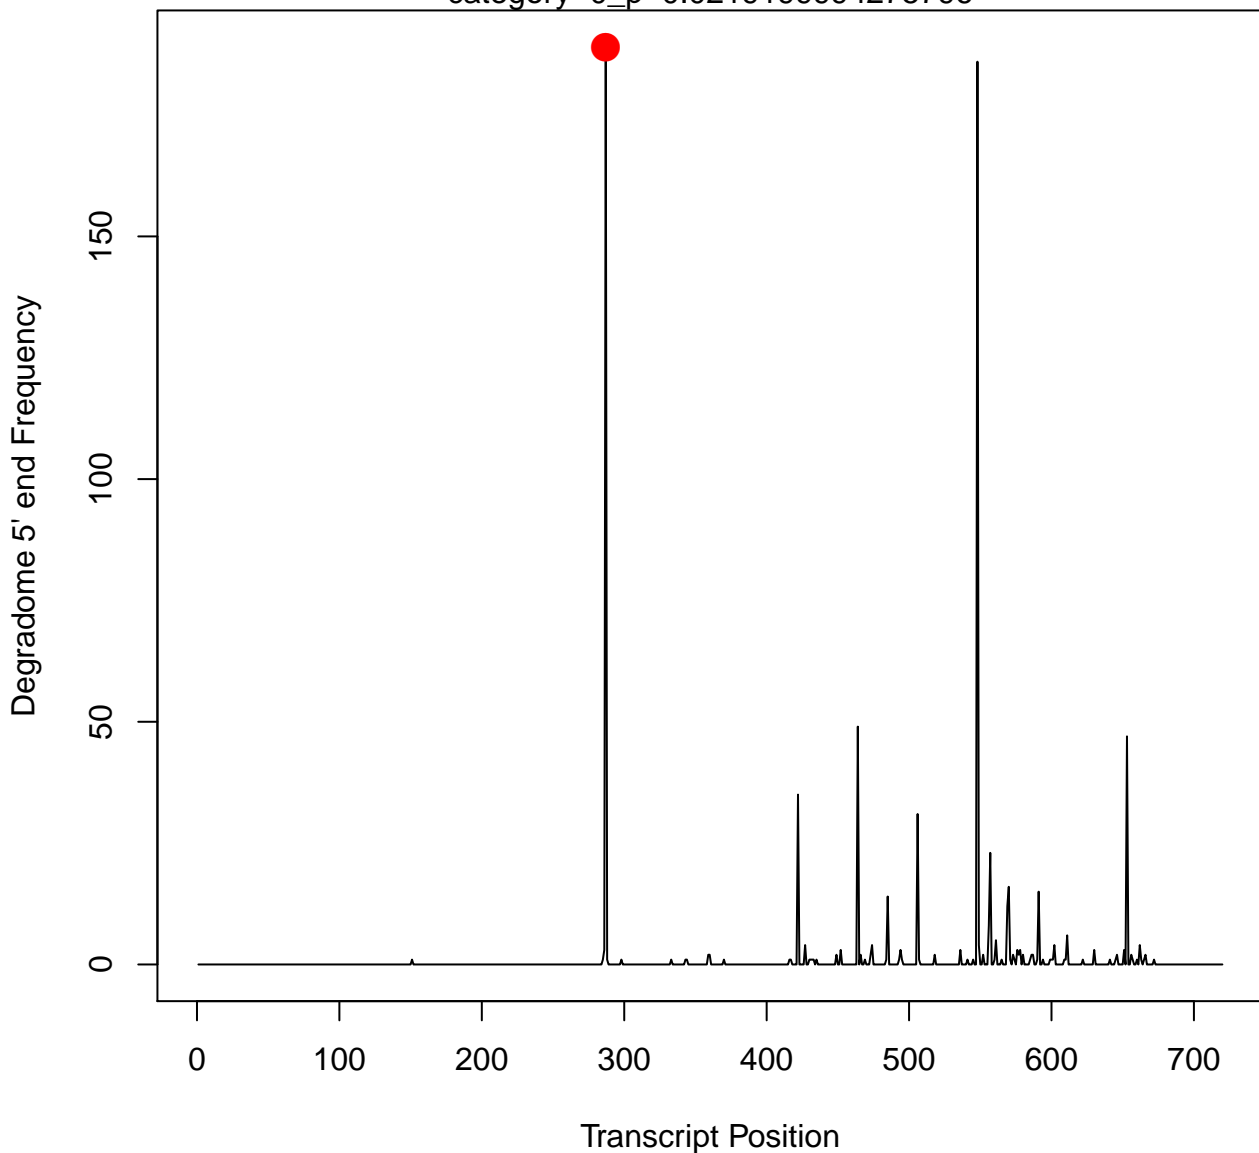

Supplement: s1 [file s1]

**T=Cluster-18410.40181\_Q=novel\_38\_S=102**

category=2\_p=0.0887427285779705

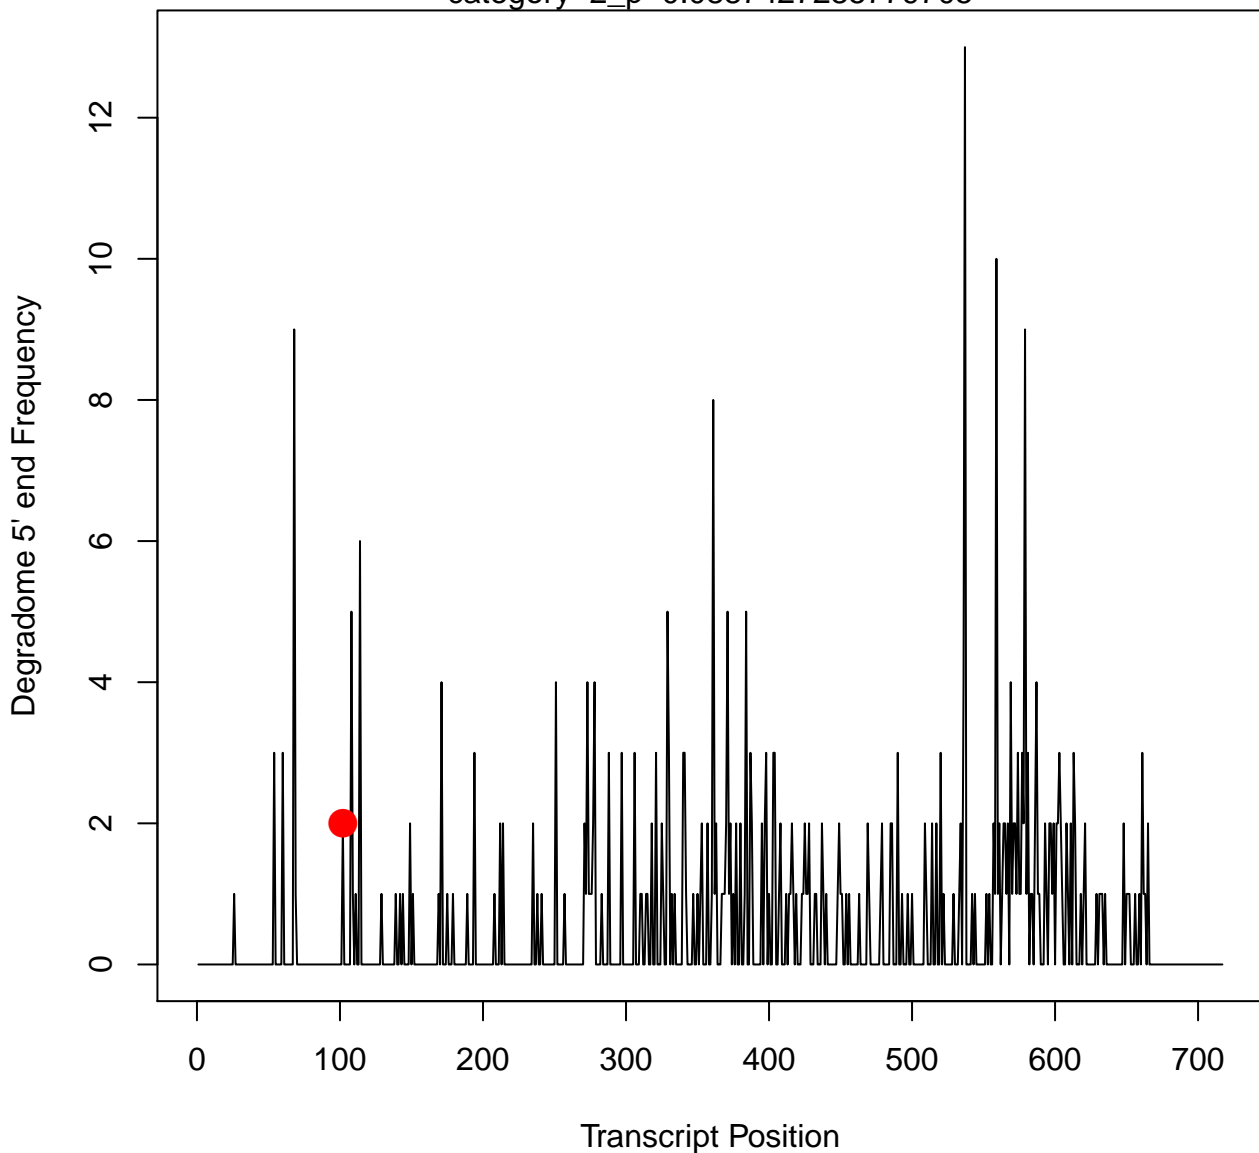

Supplement: s1 [file s1]

**T=Cluster-18410.104927\_Q=novel\_34\_S=308**

category=0\_p=0.0291193662351604

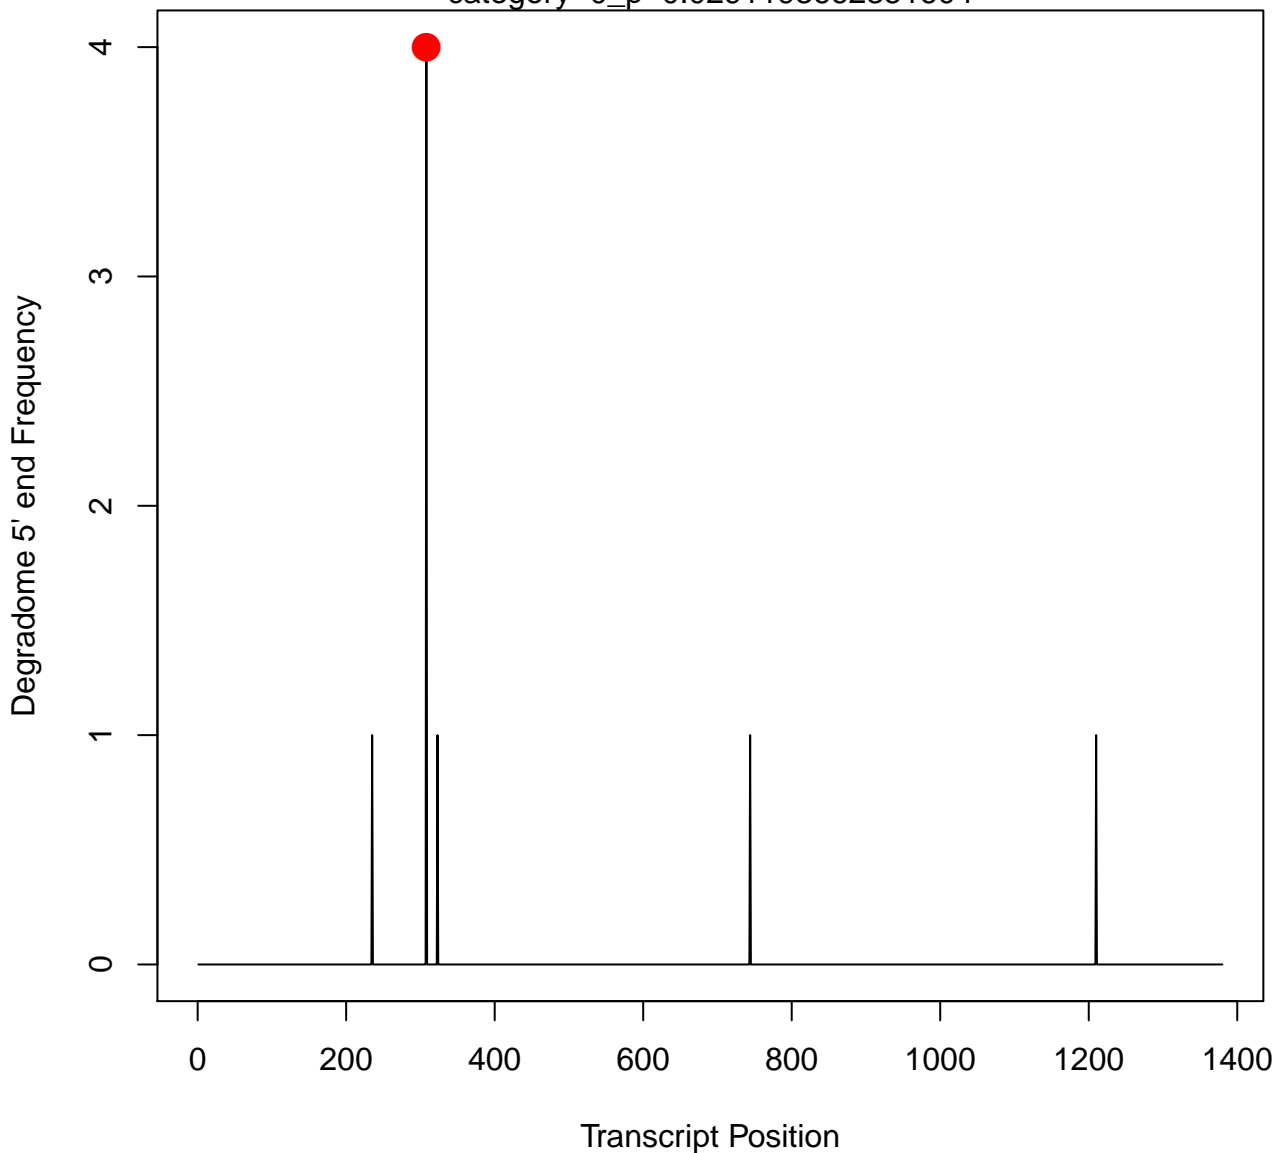

Supplement: s1 [file s1]

**T=Cluster-18410.16261\_Q=novel\_70\_S=233**

category=4\_p=0.0483072886549676

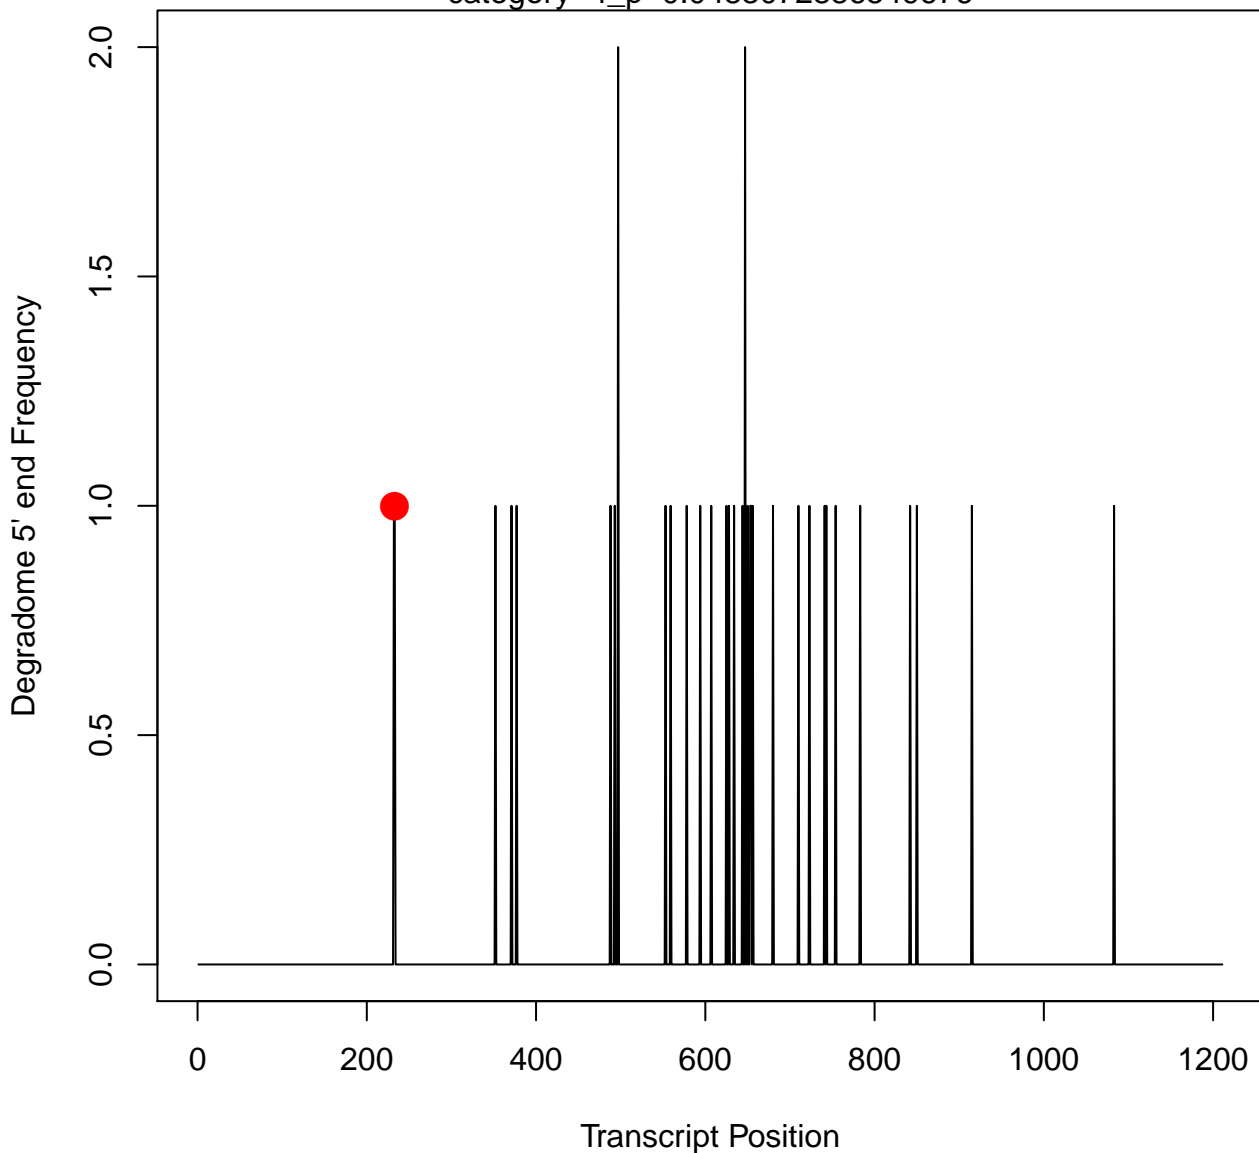

Supplement: s1 [file s1]

**T=Cluster-18410.77897\_Q=pma-miR482a\_S=128**

category=0\_p=0.0291193662351604

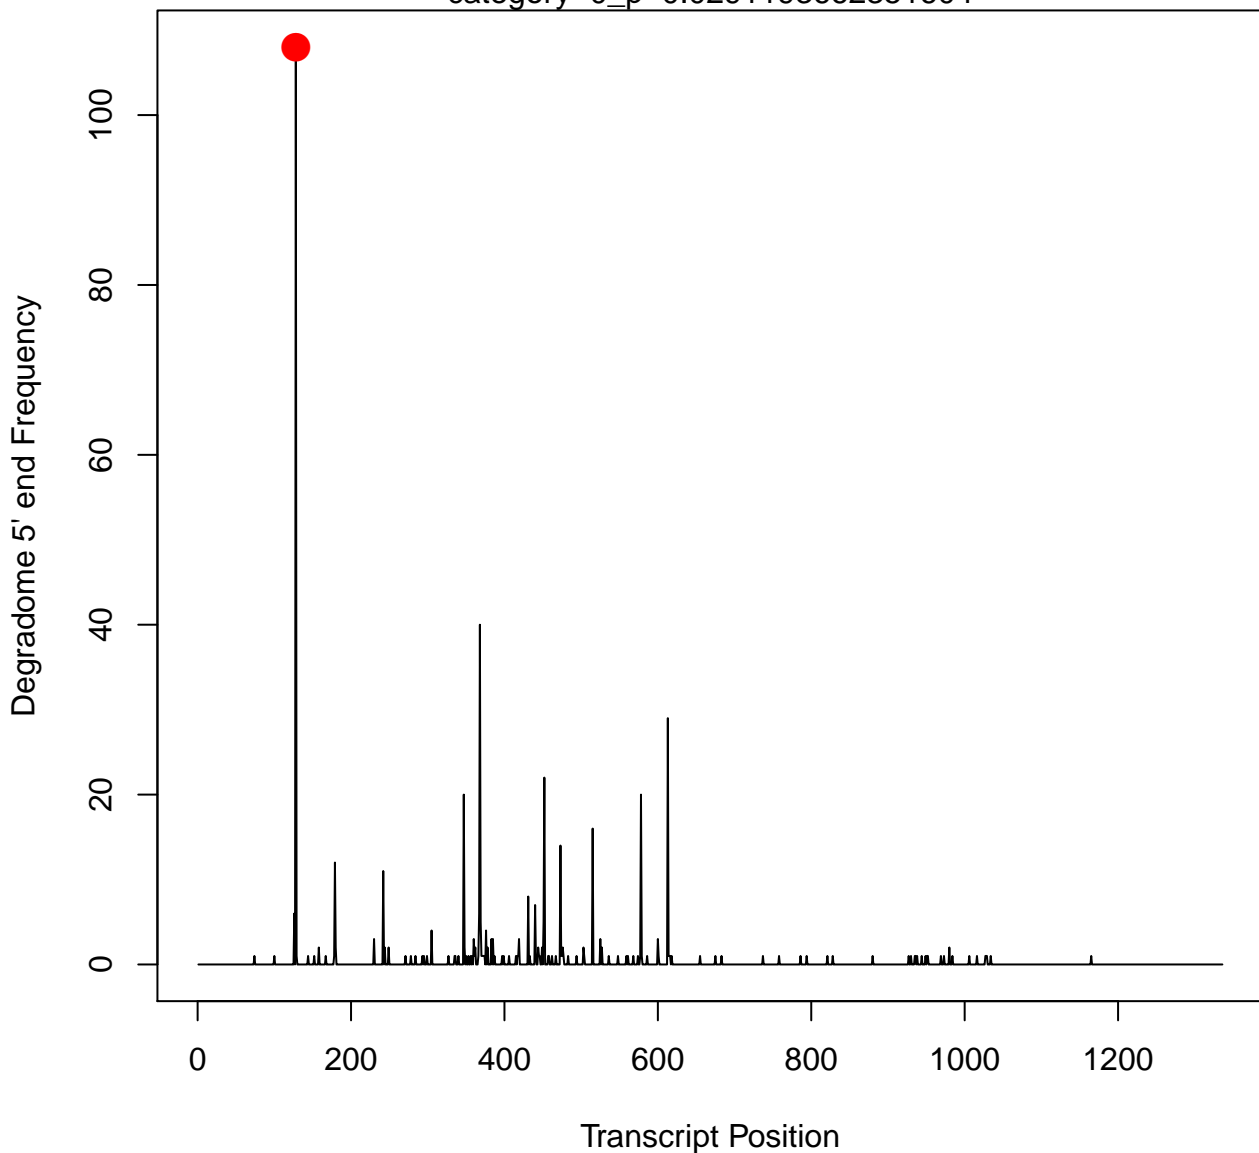

Supplement: s1 [file s1]

**T=Cluster-18410.111424\_Q=novel\_12\_S=241**

category=0\_p=0.0122377313407951

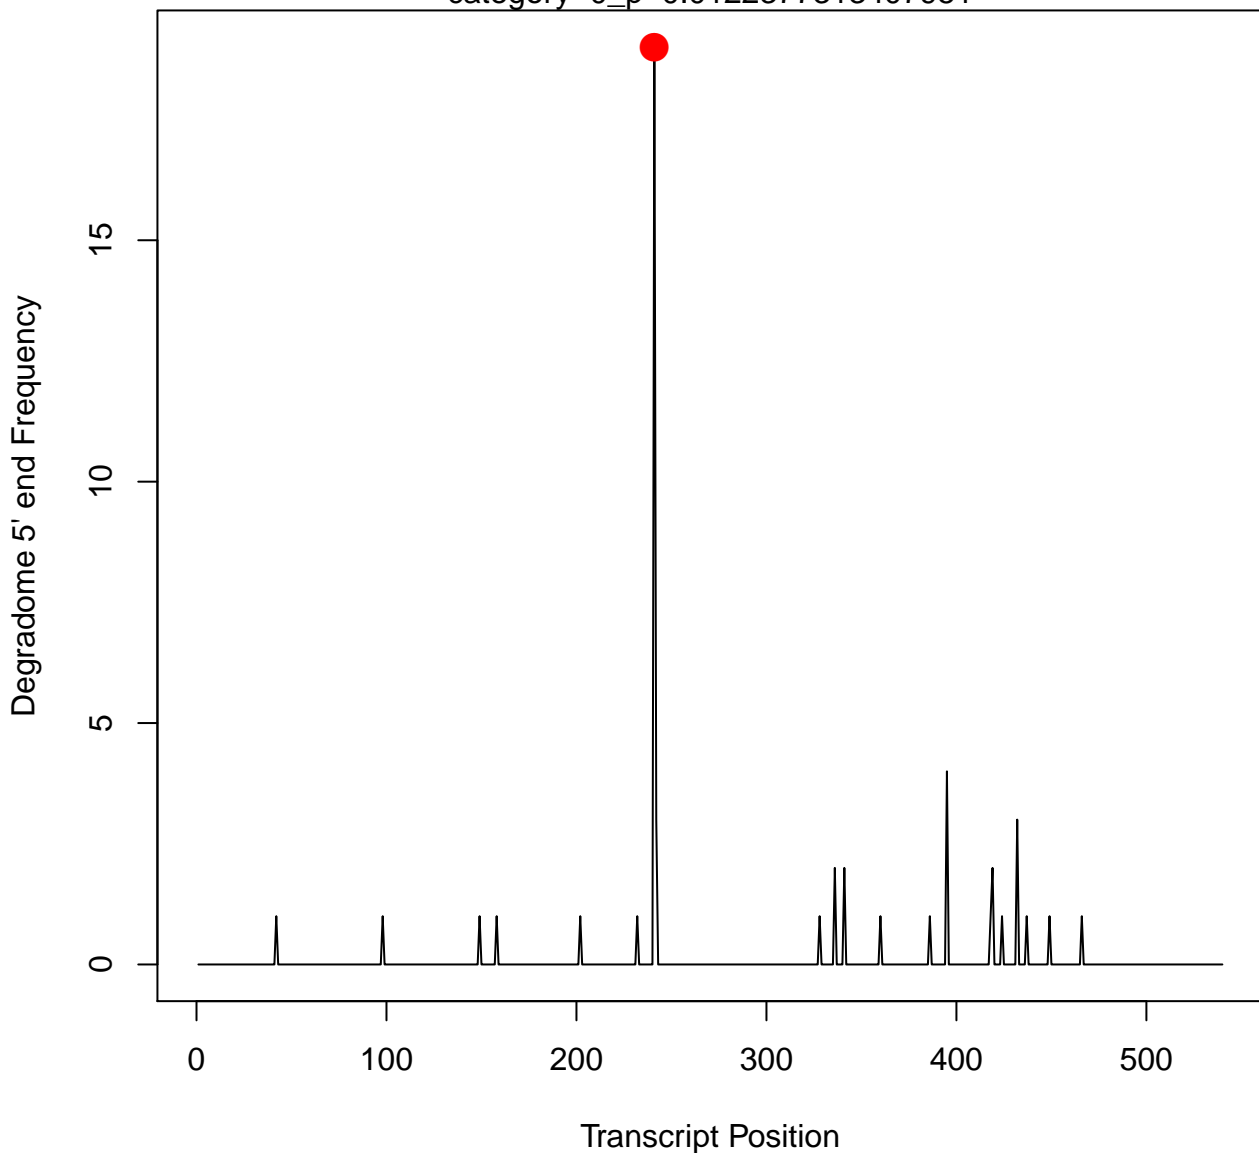

Supplement: s1 [file s1]

**T=Cluster-18410.65780\_Q=novel\_32\_S=925**

category=0\_p=0.00191355797950399

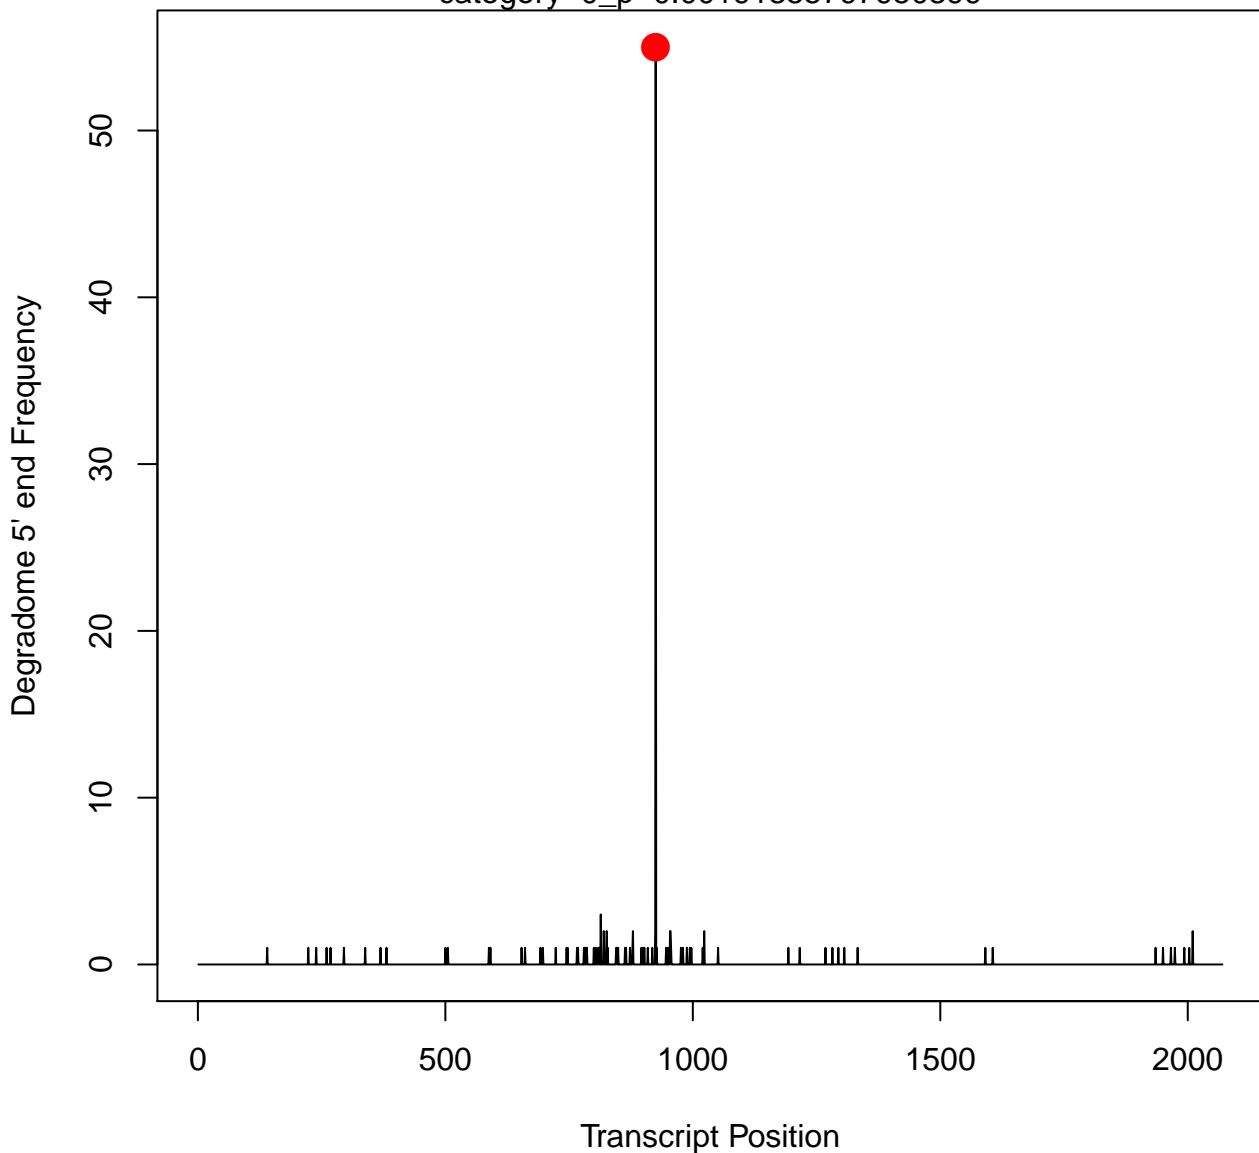

Supplement: s1 [file s1]

**T=Cluster-18410.65474\_Q=novel\_6\_S=228**

category=0\_p=0.00027358987754178

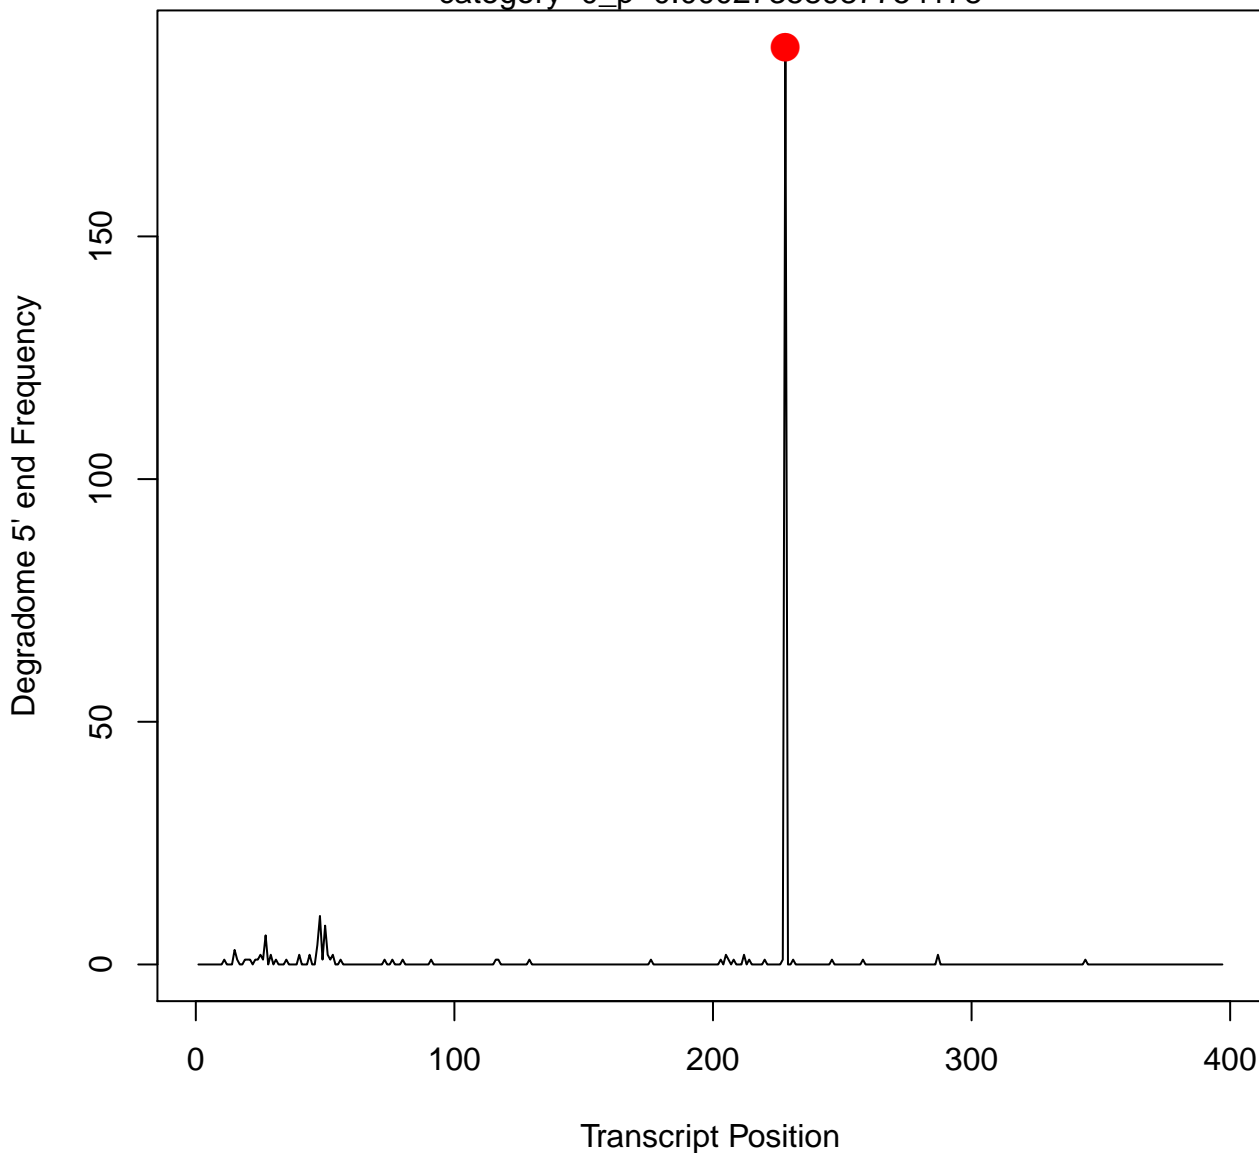

Supplement: s1 [file s1]

**T=Cluster-18410.86272\_Q=novel\_197\_S=150**

category=0\_p=0.00627366599194823

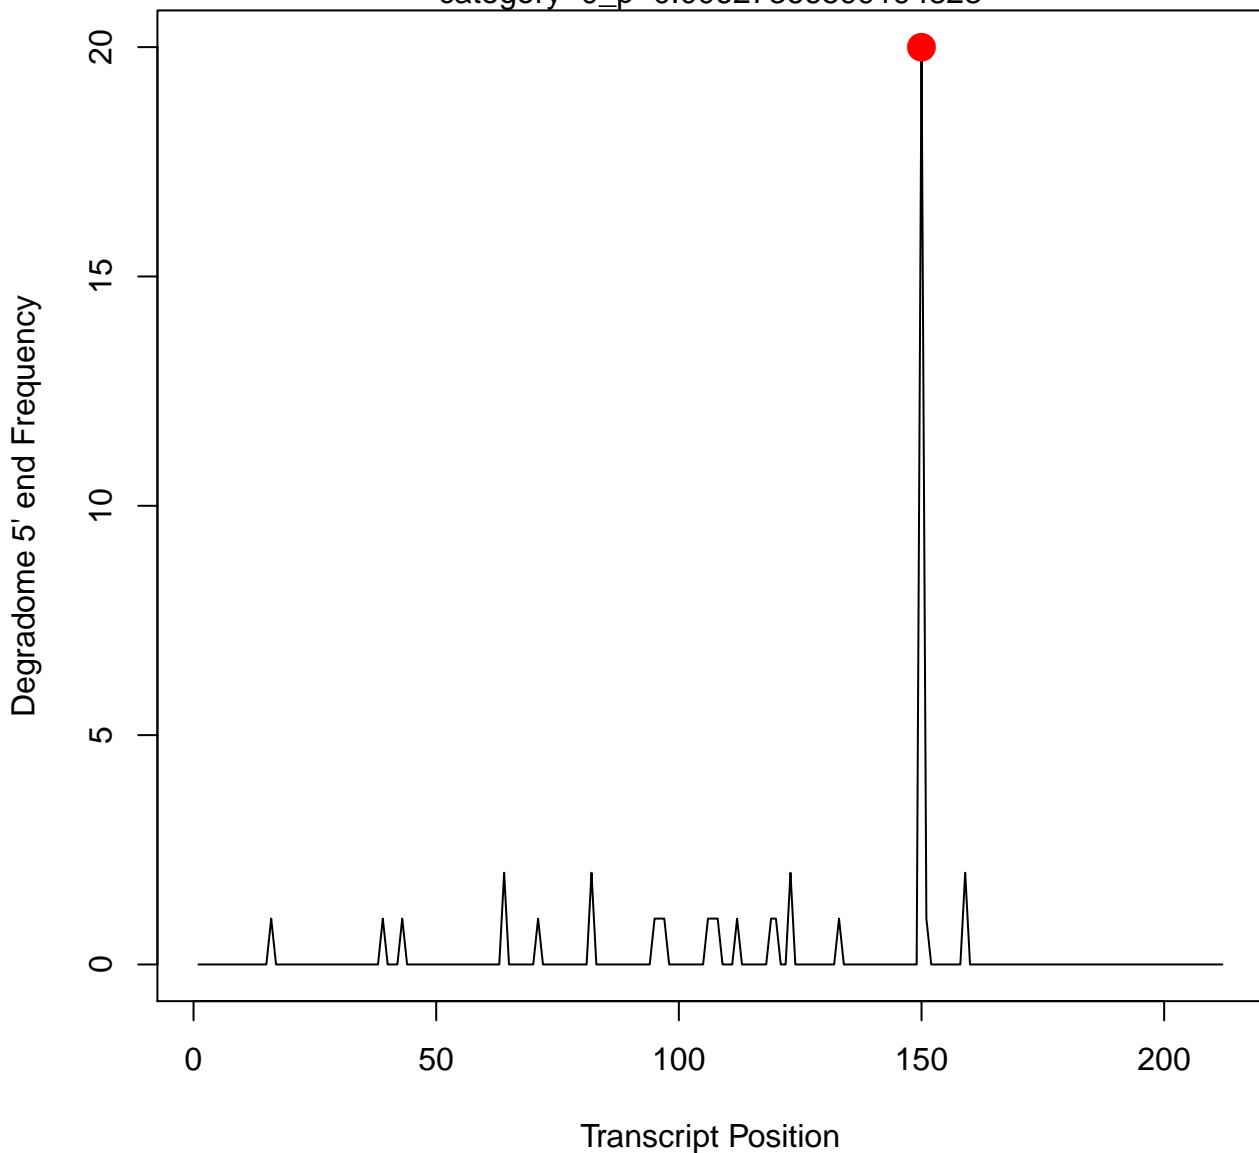

Supplement: s1 [file s1]

**T=Cluster-18410.58304\_Q=novel\_93\_S=923**

category=3\_p=0.0881450085293495

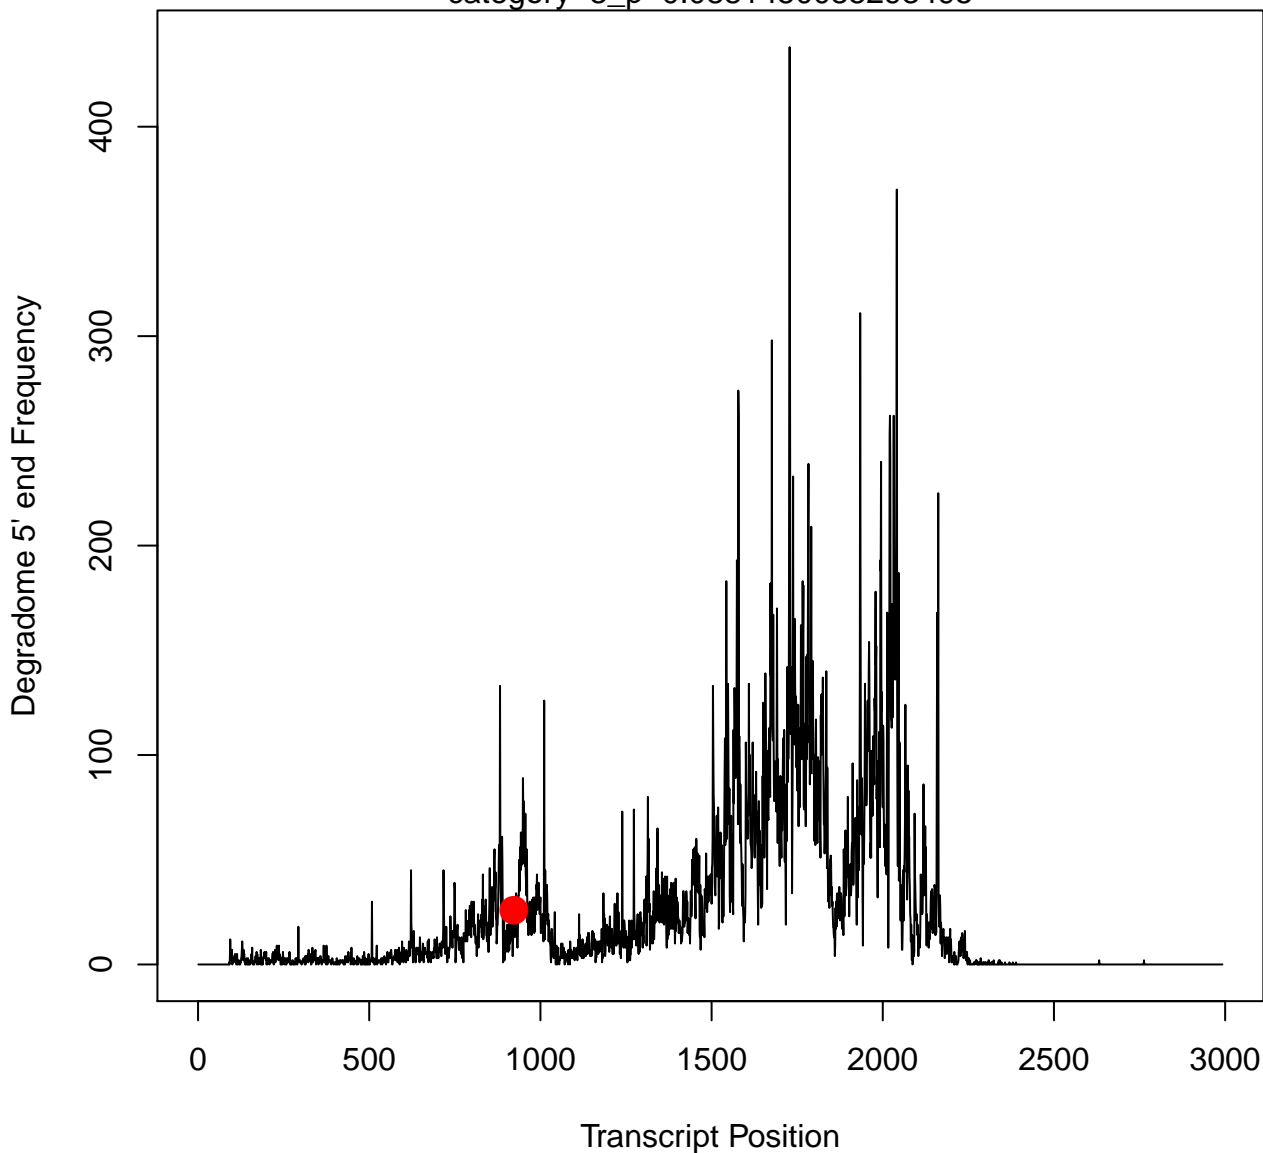

Supplement: s1 [file s1]

**T=Cluster-18410.80620\_Q=novel\_14\_S=829**

category=0\_p=0.0100731331718849

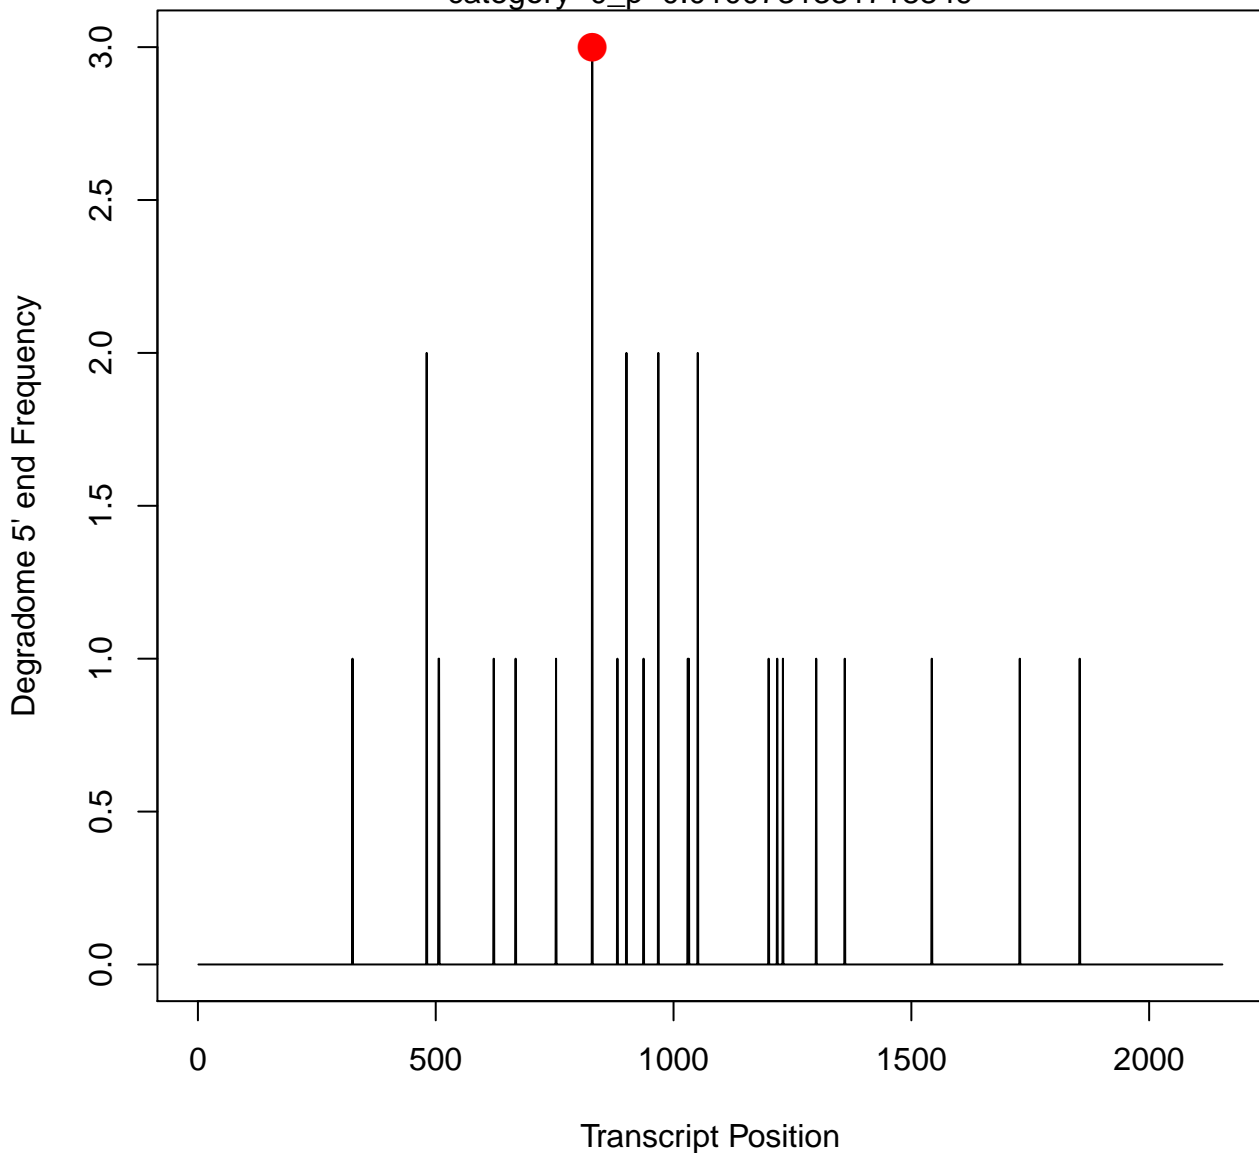

Supplement: s1 [file s1]

**T=Cluster-18410.38799\_Q=novel\_20\_S=1520**

category=0\_p=0.00545759909929999

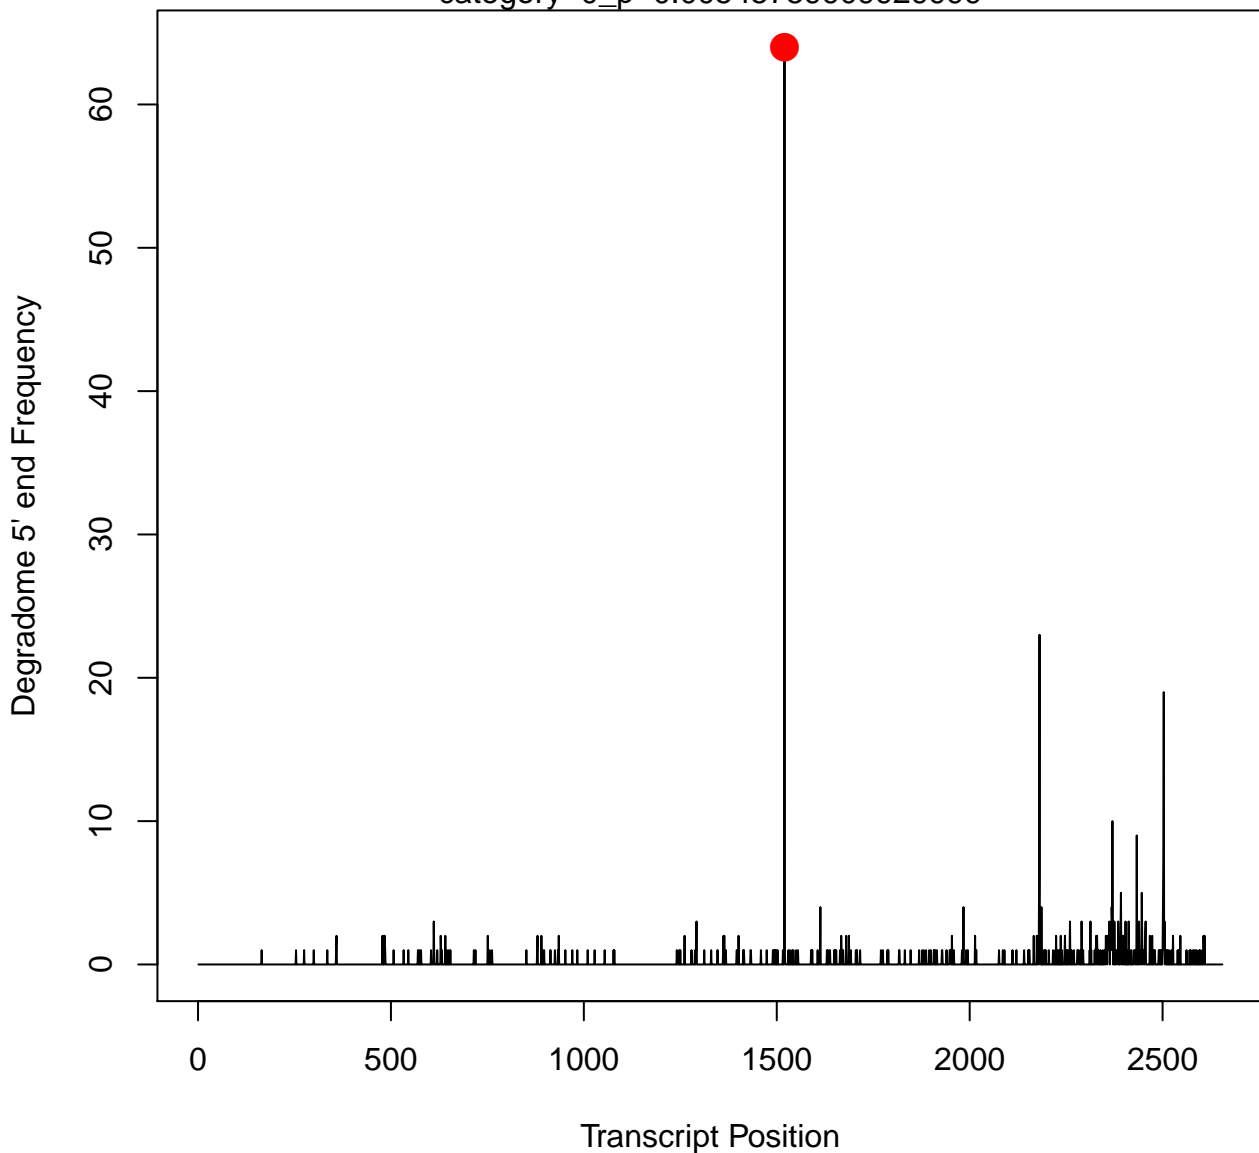

Supplement: s1 [file s1]

**T=Cluster-18410.29480\_Q=novel\_46\_S=873**

category=0\_p=0.0040959980740275

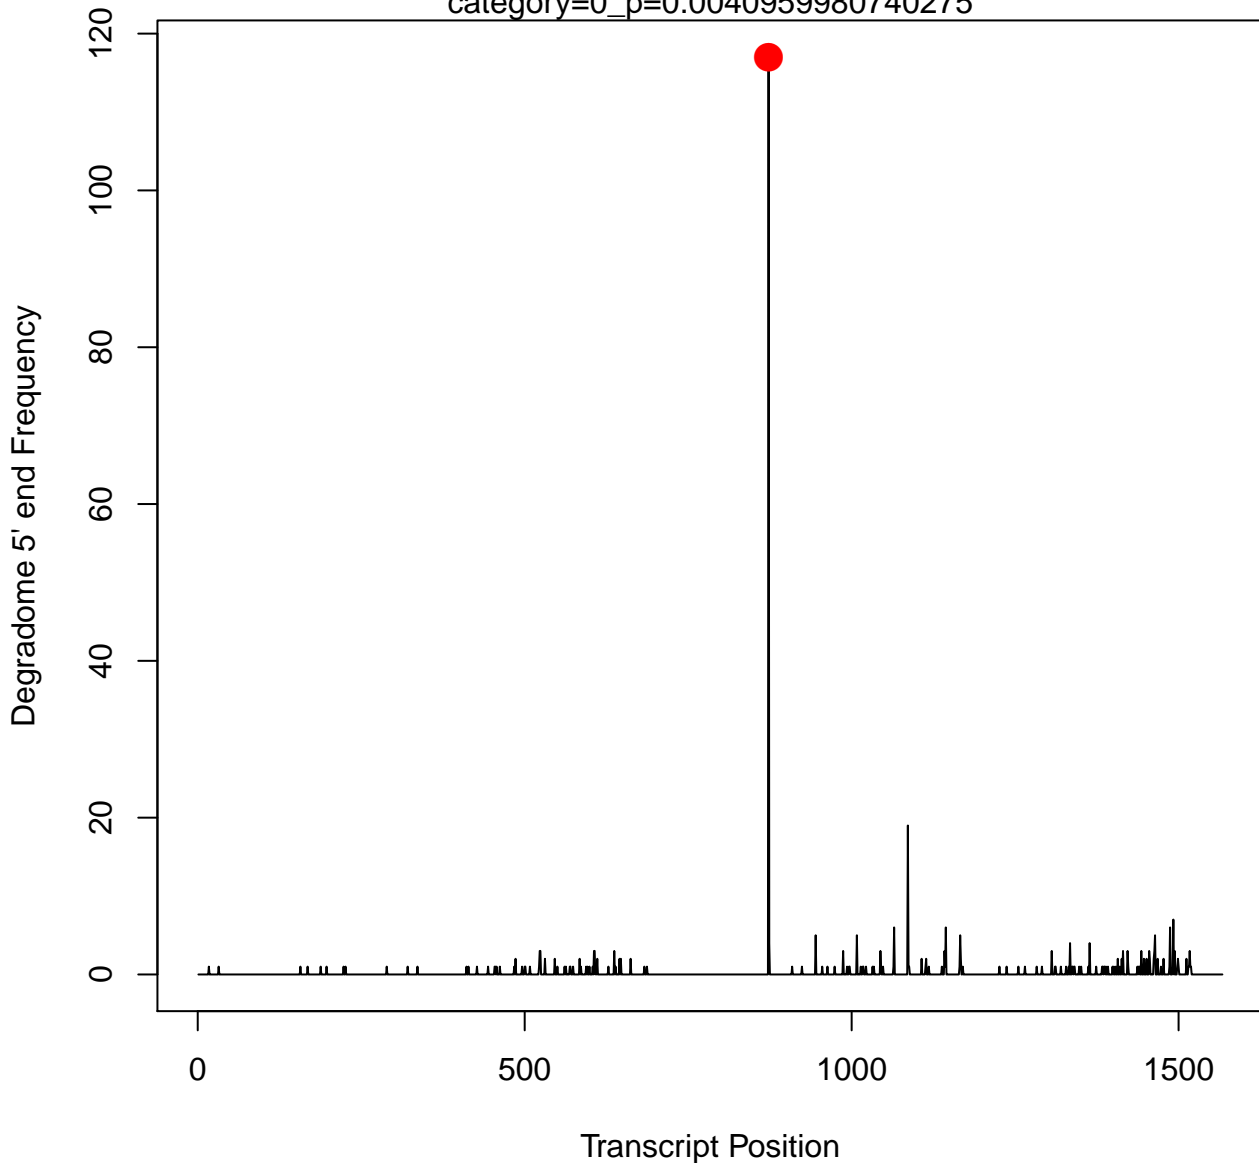

Supplement: s1 [file s1]

**T=Cluster-18410.9306\_Q=novel\_193\_S=92**

category=0\_p=0.0285879019128199

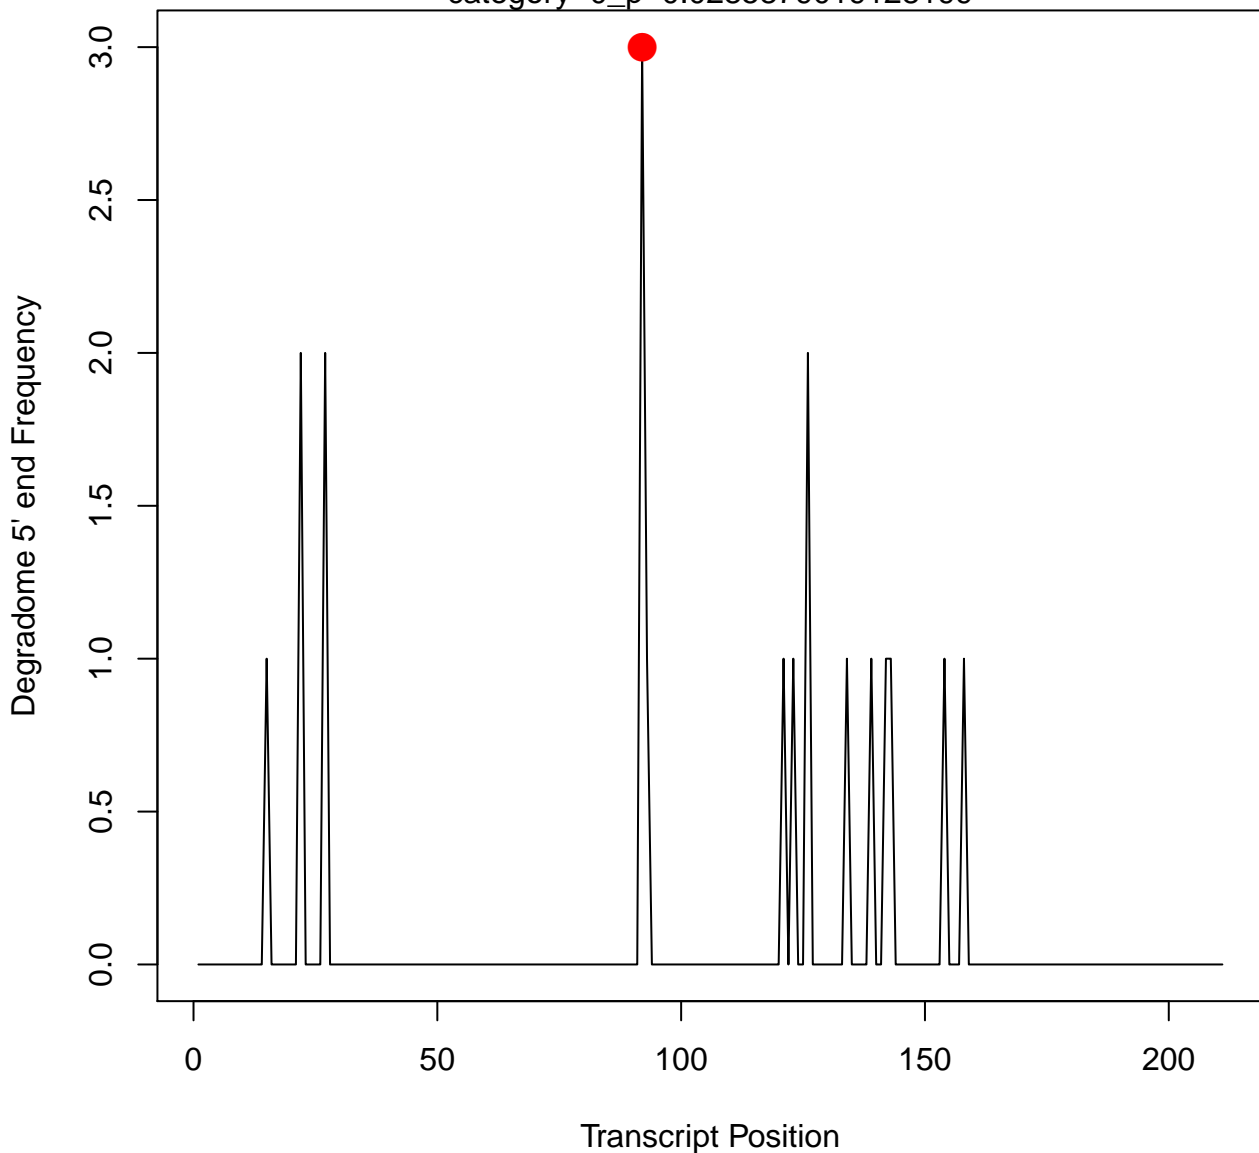

Supplement: s1 [file s1]

**T=Cluster-18410.62761\_Q=novel\_158\_S=715**

category=3\_p=0.063058846212125

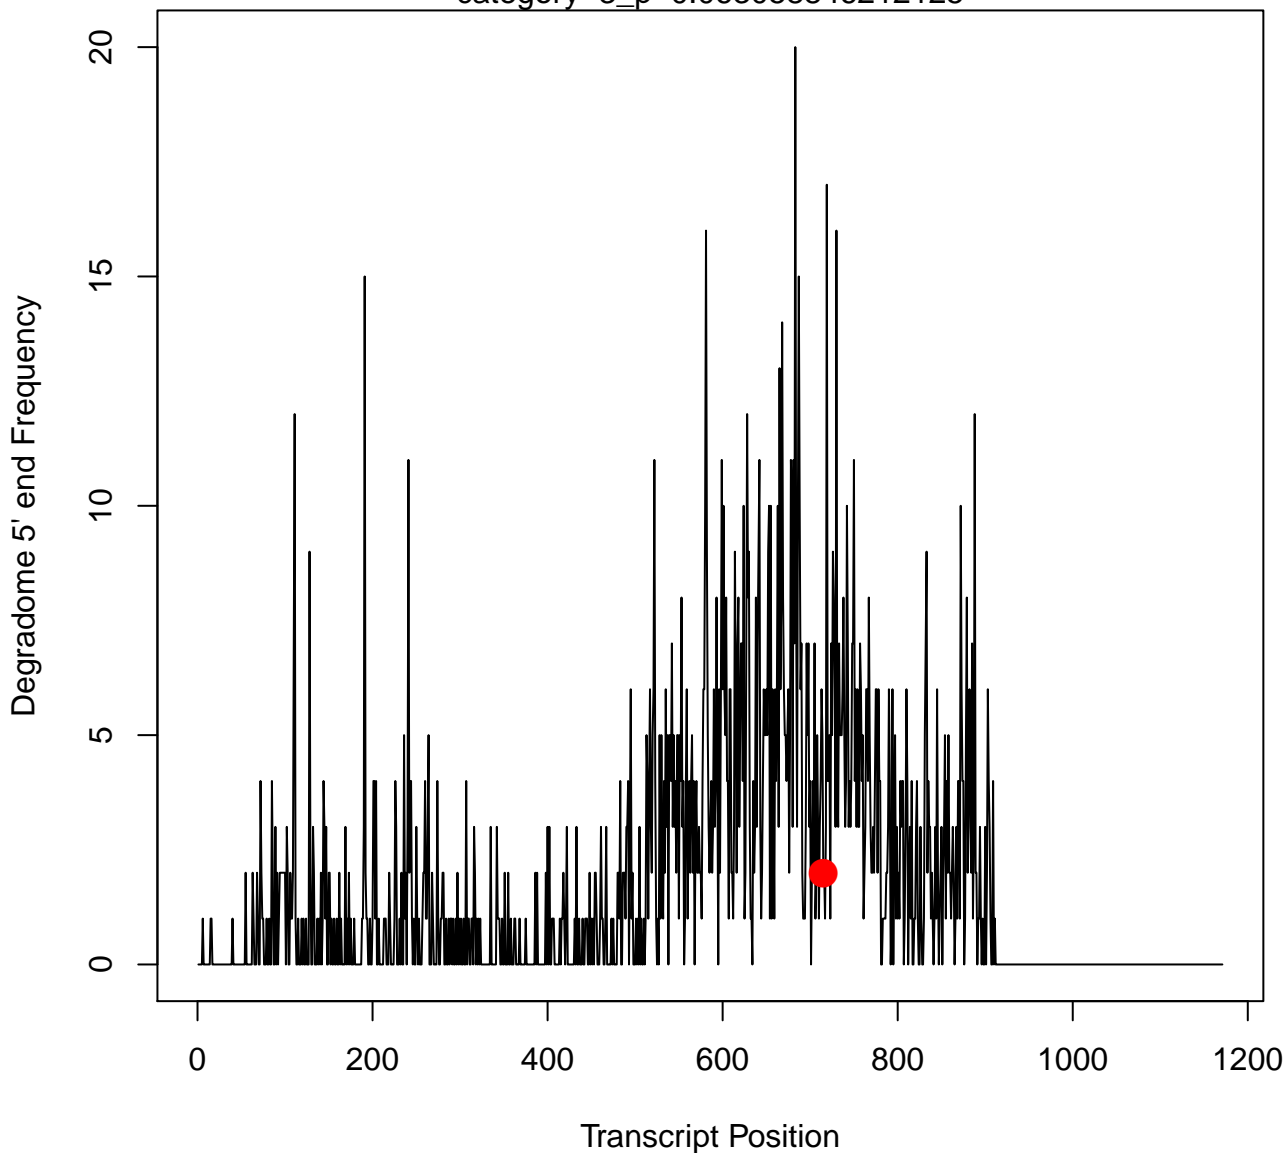

Supplement: s1 [file s1]

**T=Cluster-18410.65468\_Q=novel\_59\_S=370**

category=0\_p=0.0135882009795663

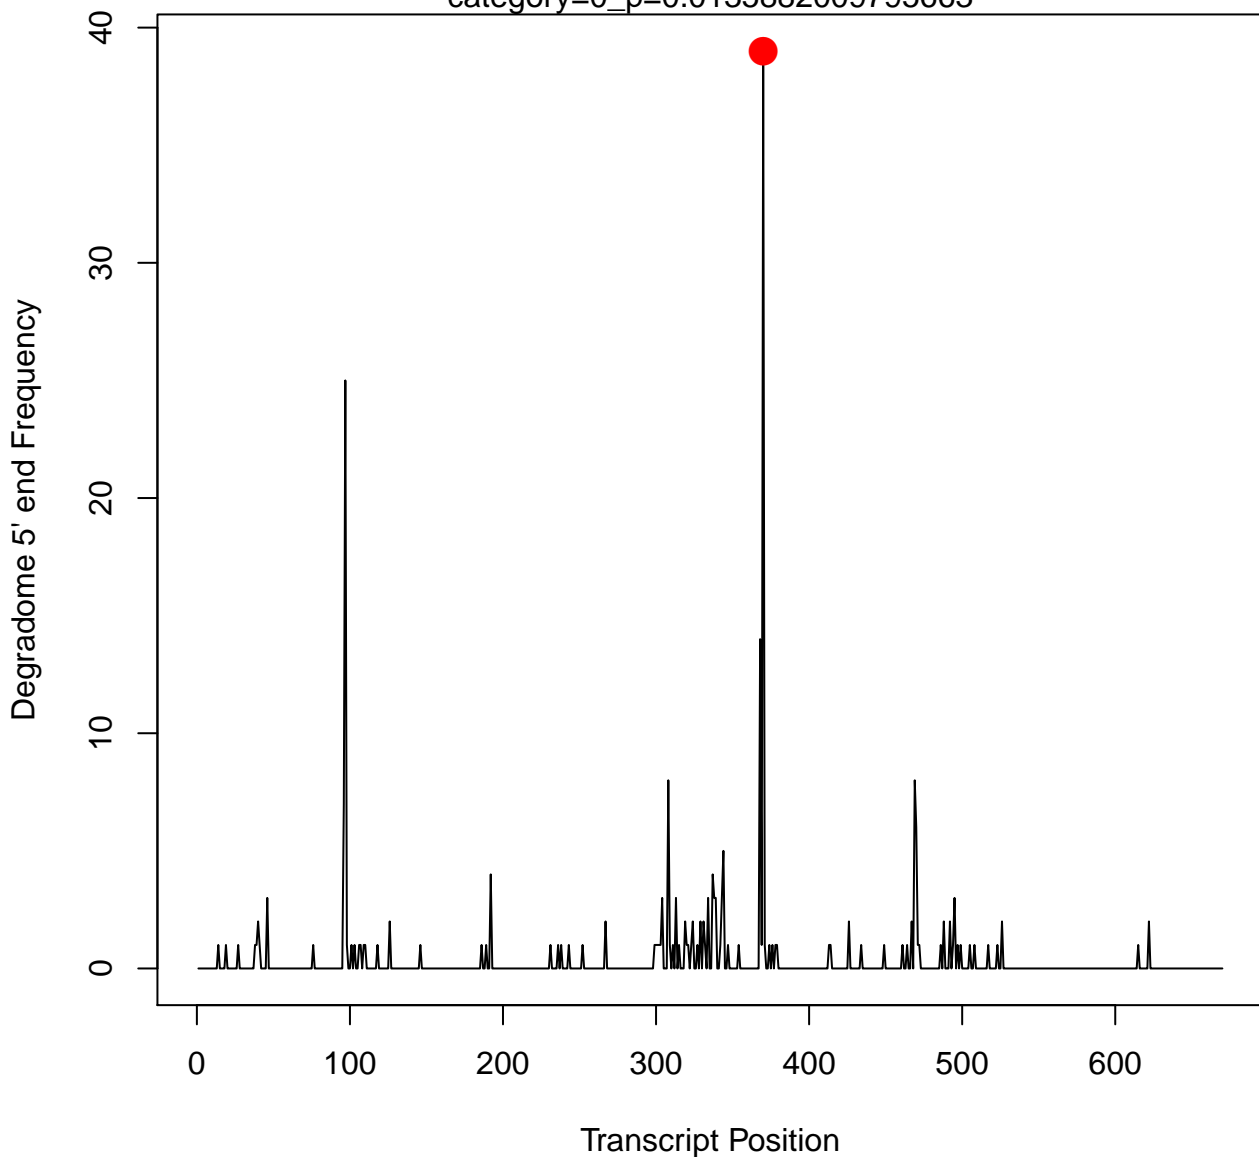

Supplement: s1 [file s1]

**T=Cluster-18410.12639\_Q=novel\_114\_S=1831**

category=1\_p=0.0400425433541117

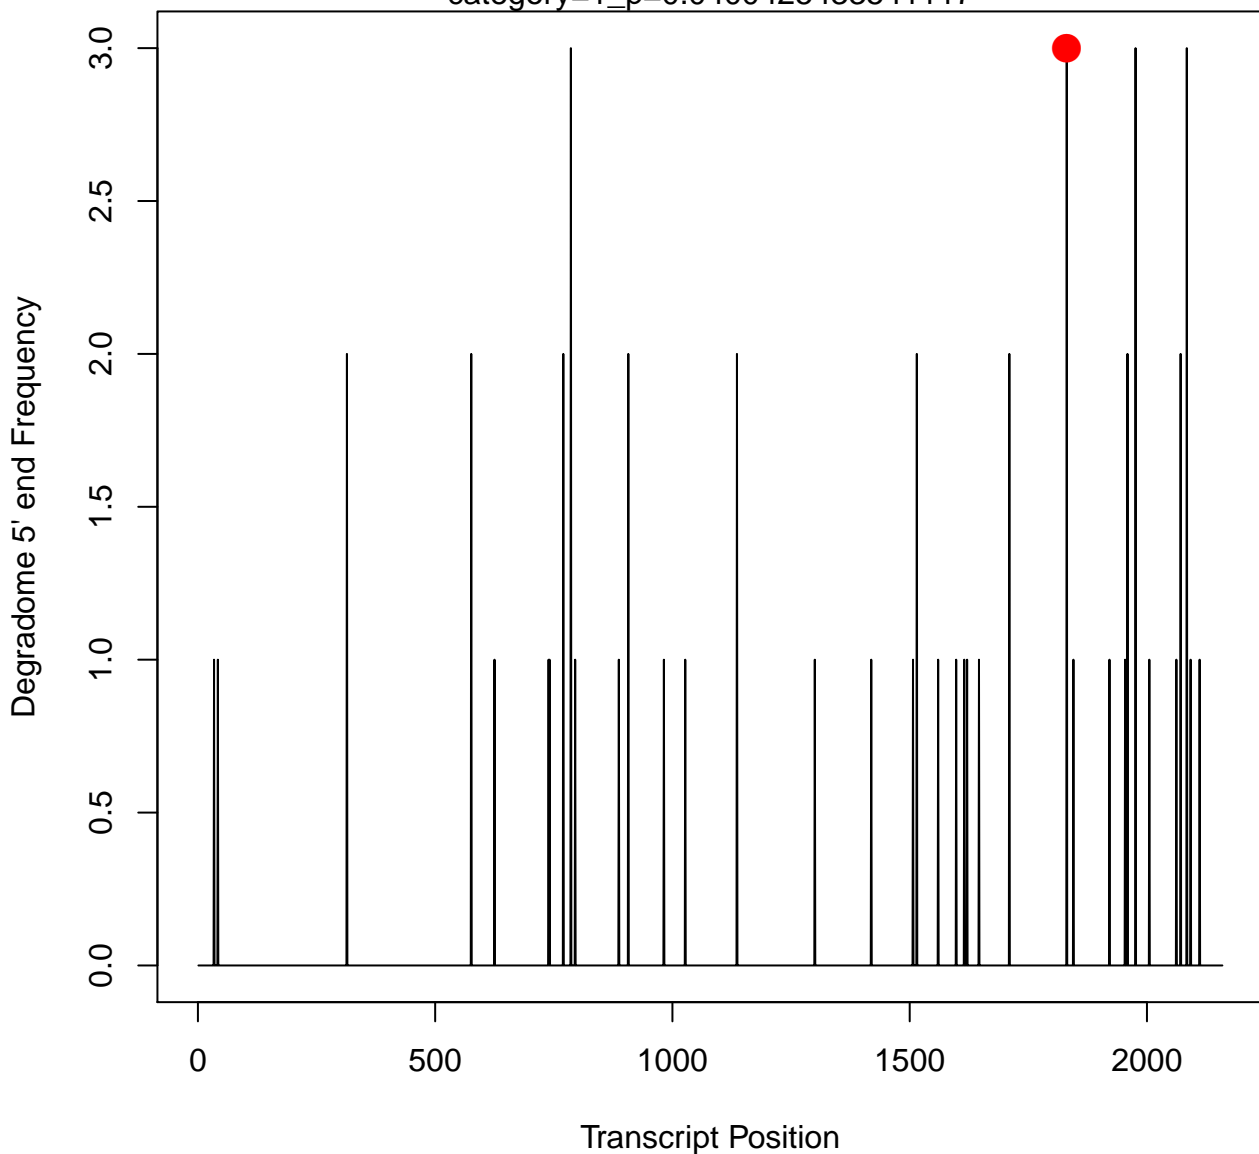

Supplement: s1 [file s1]

**T=Cluster-18410.37945\_Q=pma-miR482a\_S=194**

category=0\_p=0.0269917627532715

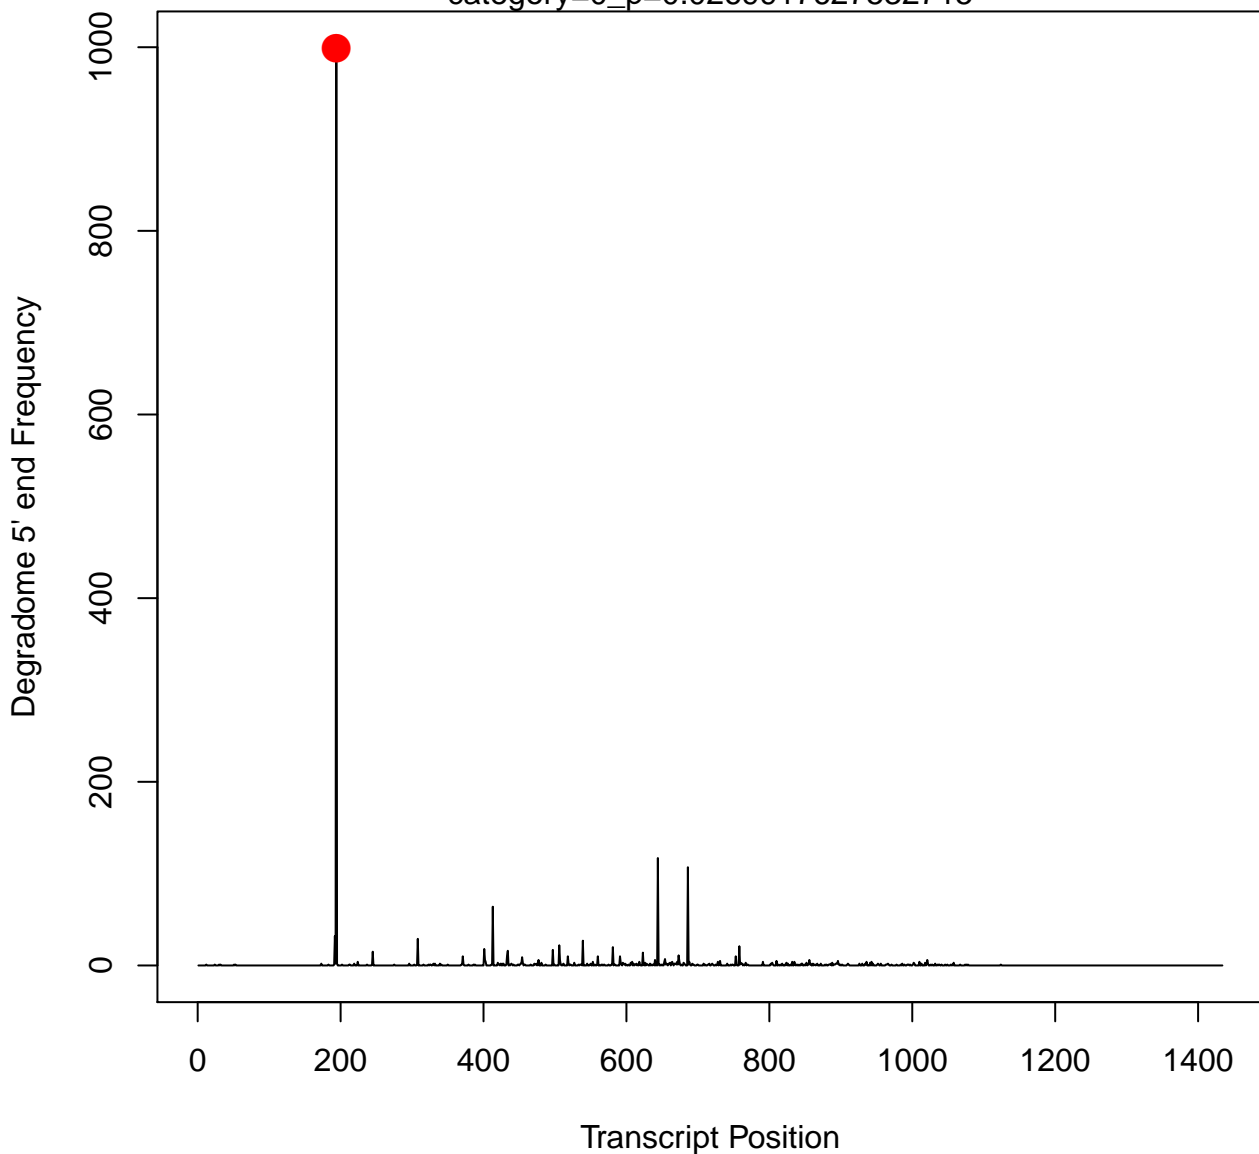

Supplement: s1 [file s1]

**T=Cluster-18410.63418\_Q=pma-miR482c\_S=1190**

category=0\_p=0.00273253291772324

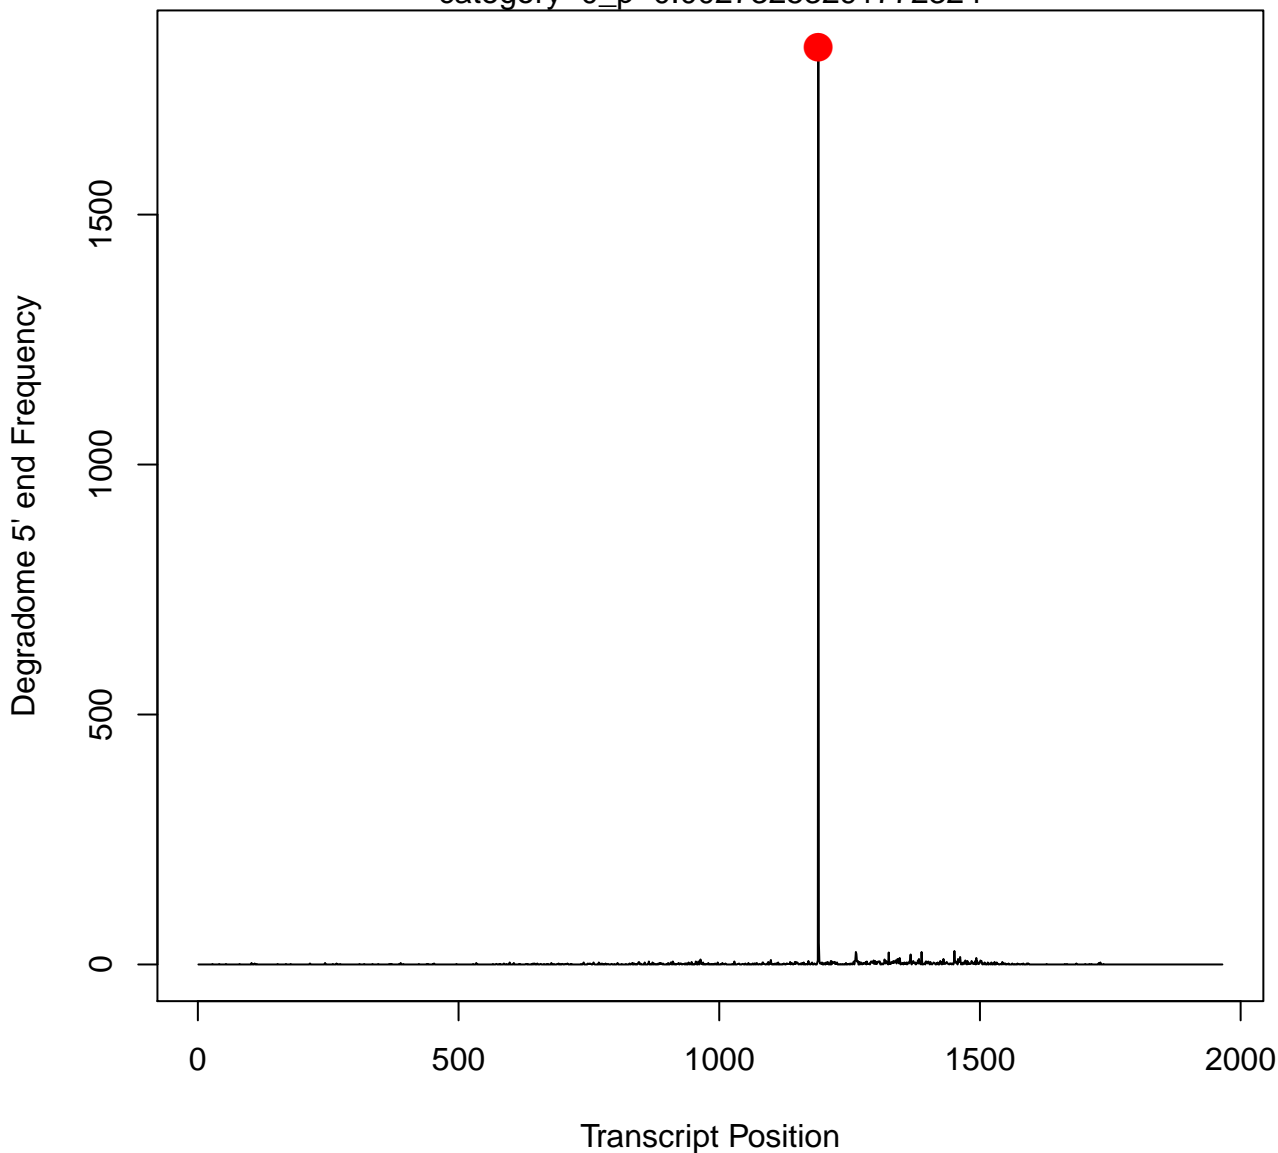

Supplement: s1 [file s1]

**T=Cluster-18410.79935\_Q=novel\_6\_S=685**

category=0\_p=0.00790379146763054

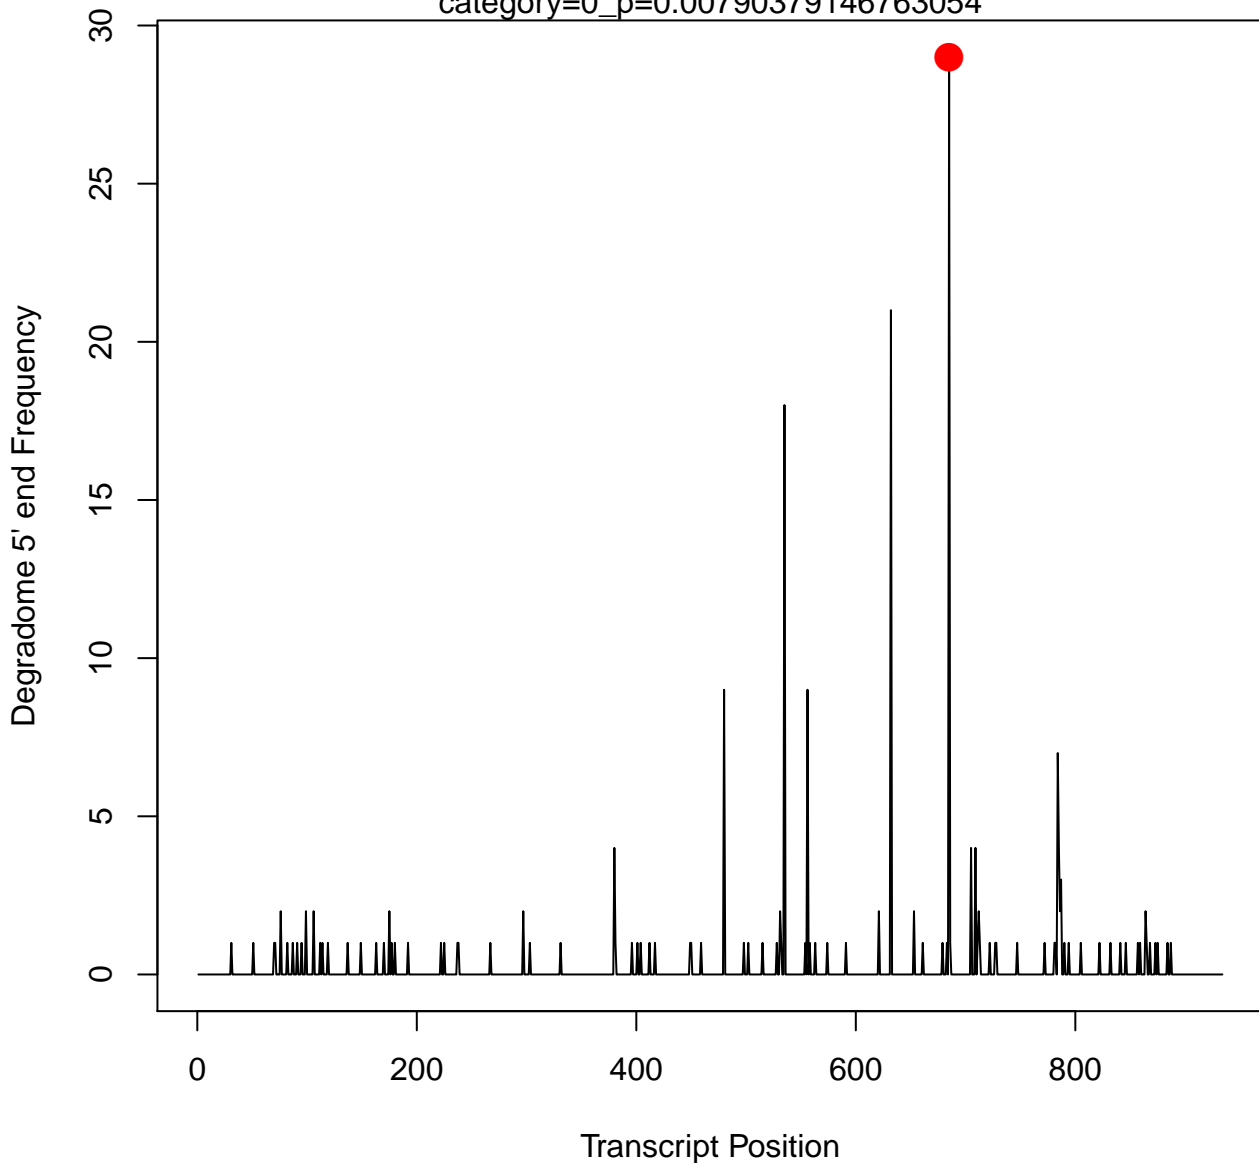

Supplement: s1 [file s1]

**T=Cluster-18410.61717\_Q=novel\_20\_S=1852**

category=0\_p=0.00790379146763054

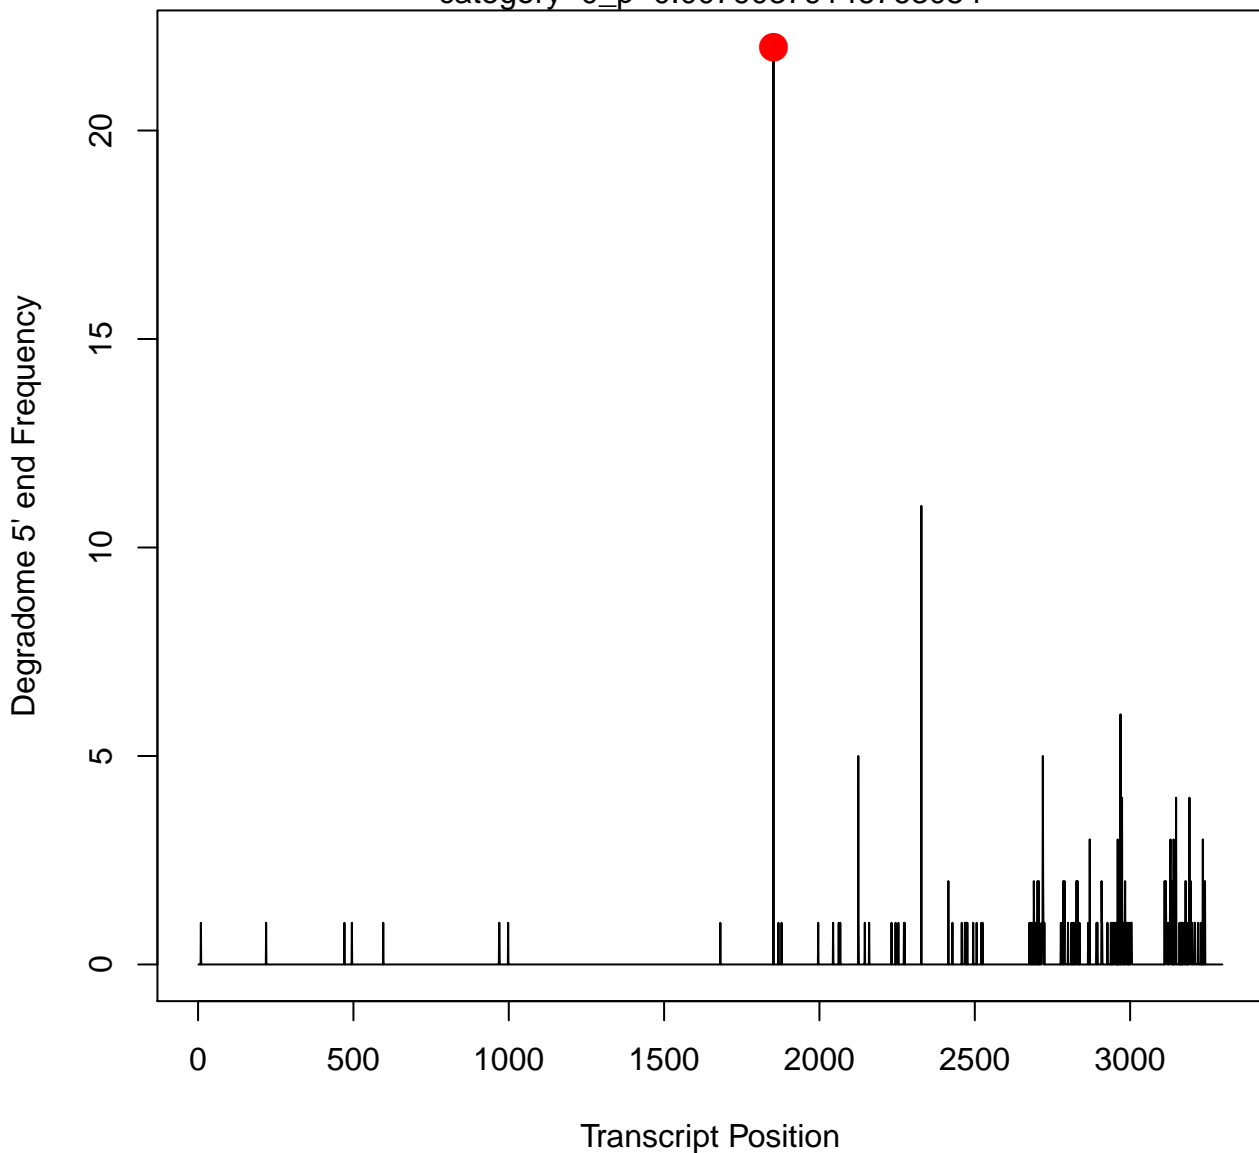

Supplement: s1 [file s1]

**T=Cluster-18410.3703\_Q=novel\_74\_S=568**

category=0\_p=0.00218662432695249

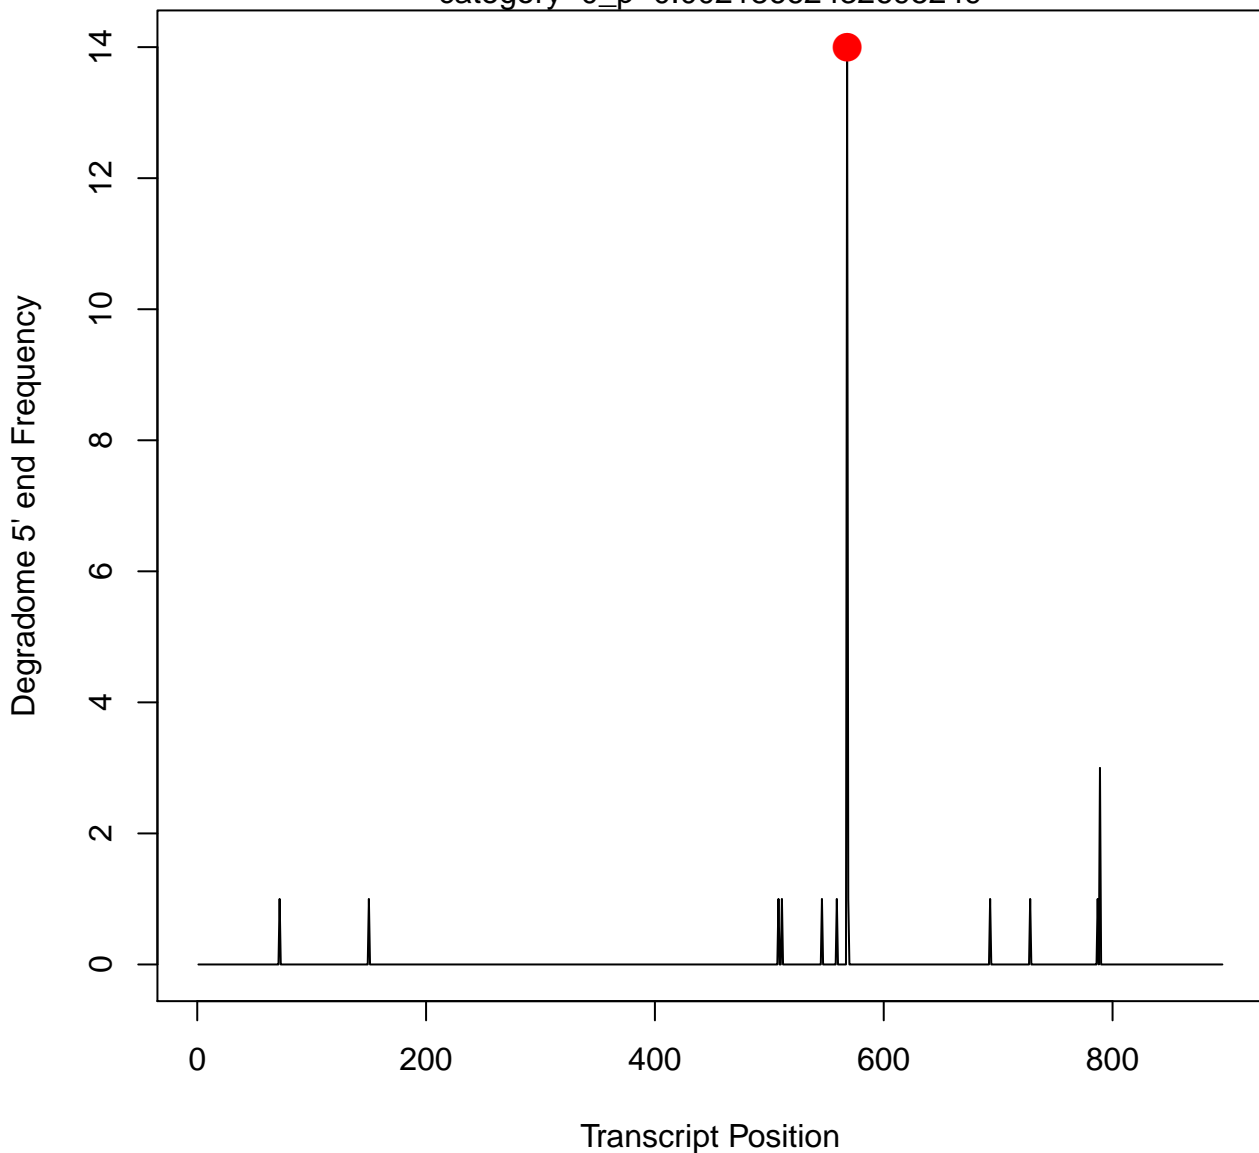

Supplement: s1 [file s1]

**T=Cluster-18410.56608\_Q=novel\_113\_S=1131**

category=0\_p=0.00600171812373296

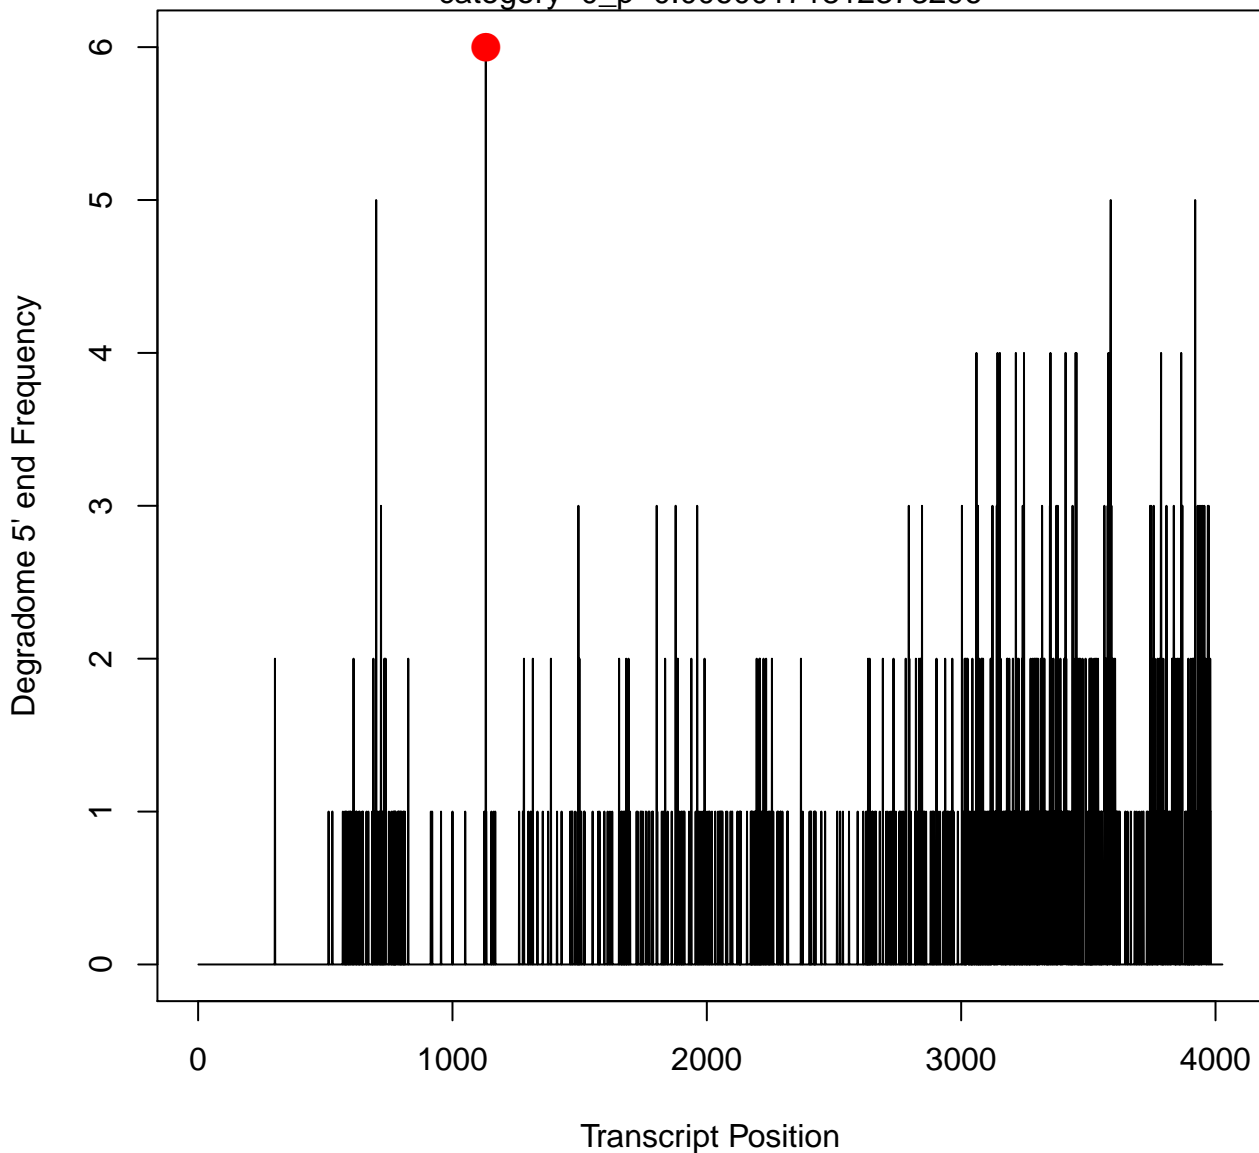

Supplement: s1 [file s1]

**T=Cluster-18410.78695\_Q=novel\_172\_S=403**

category=0\_p=0.00245961596621247

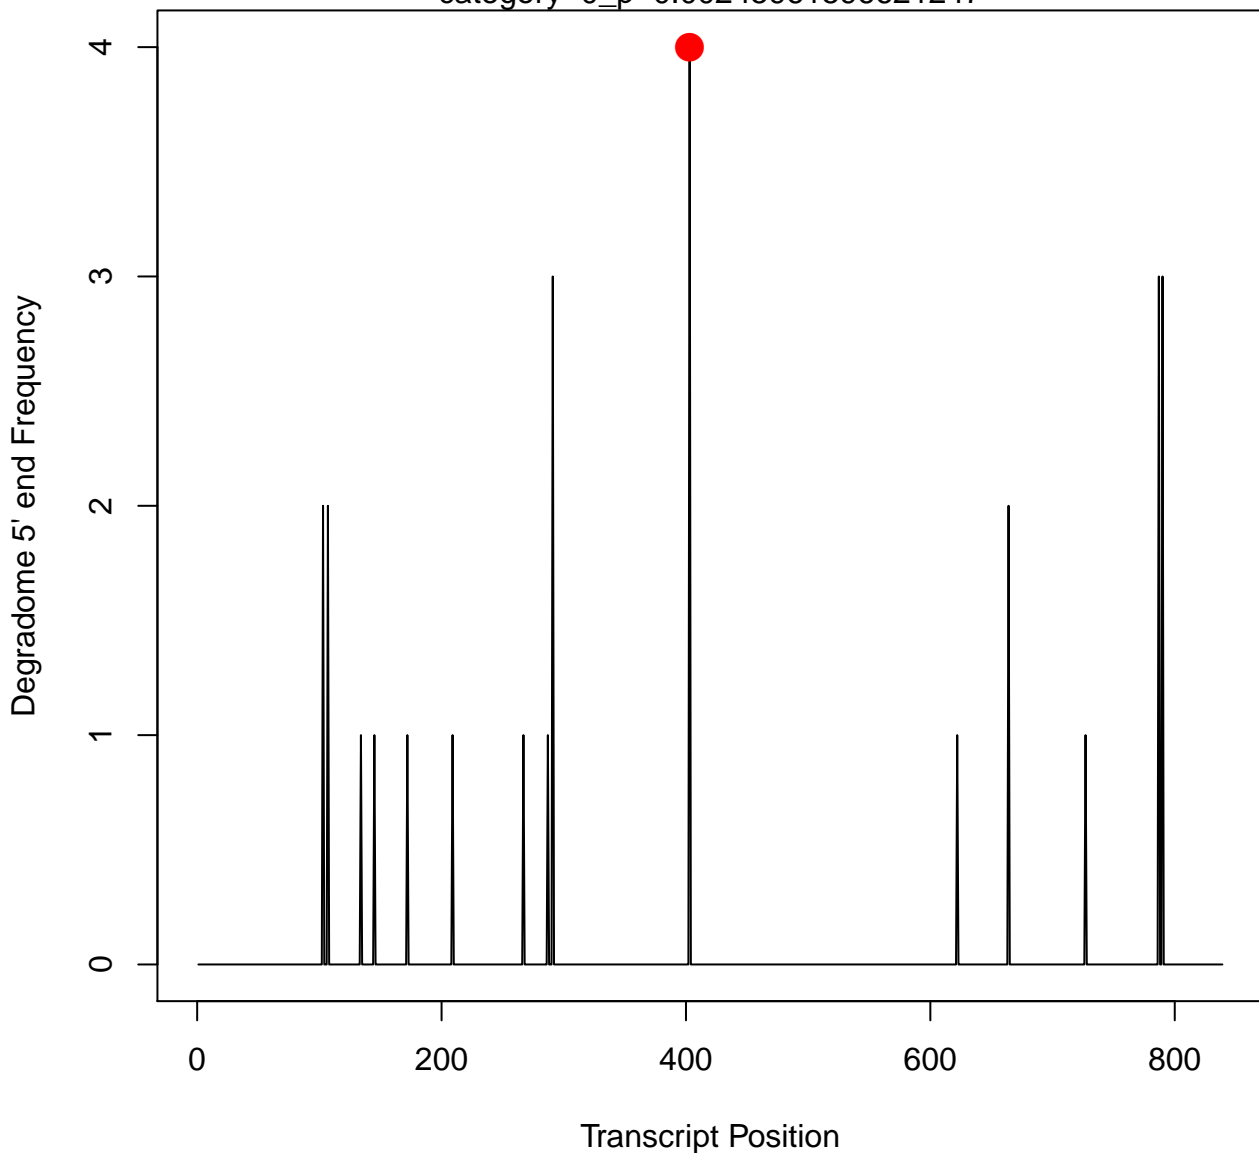

Supplement: s1 [file s1]

**T=Cluster-18410.113704\_Q=novel\_168\_S=431**

category=0\_p=0.0205809366280733

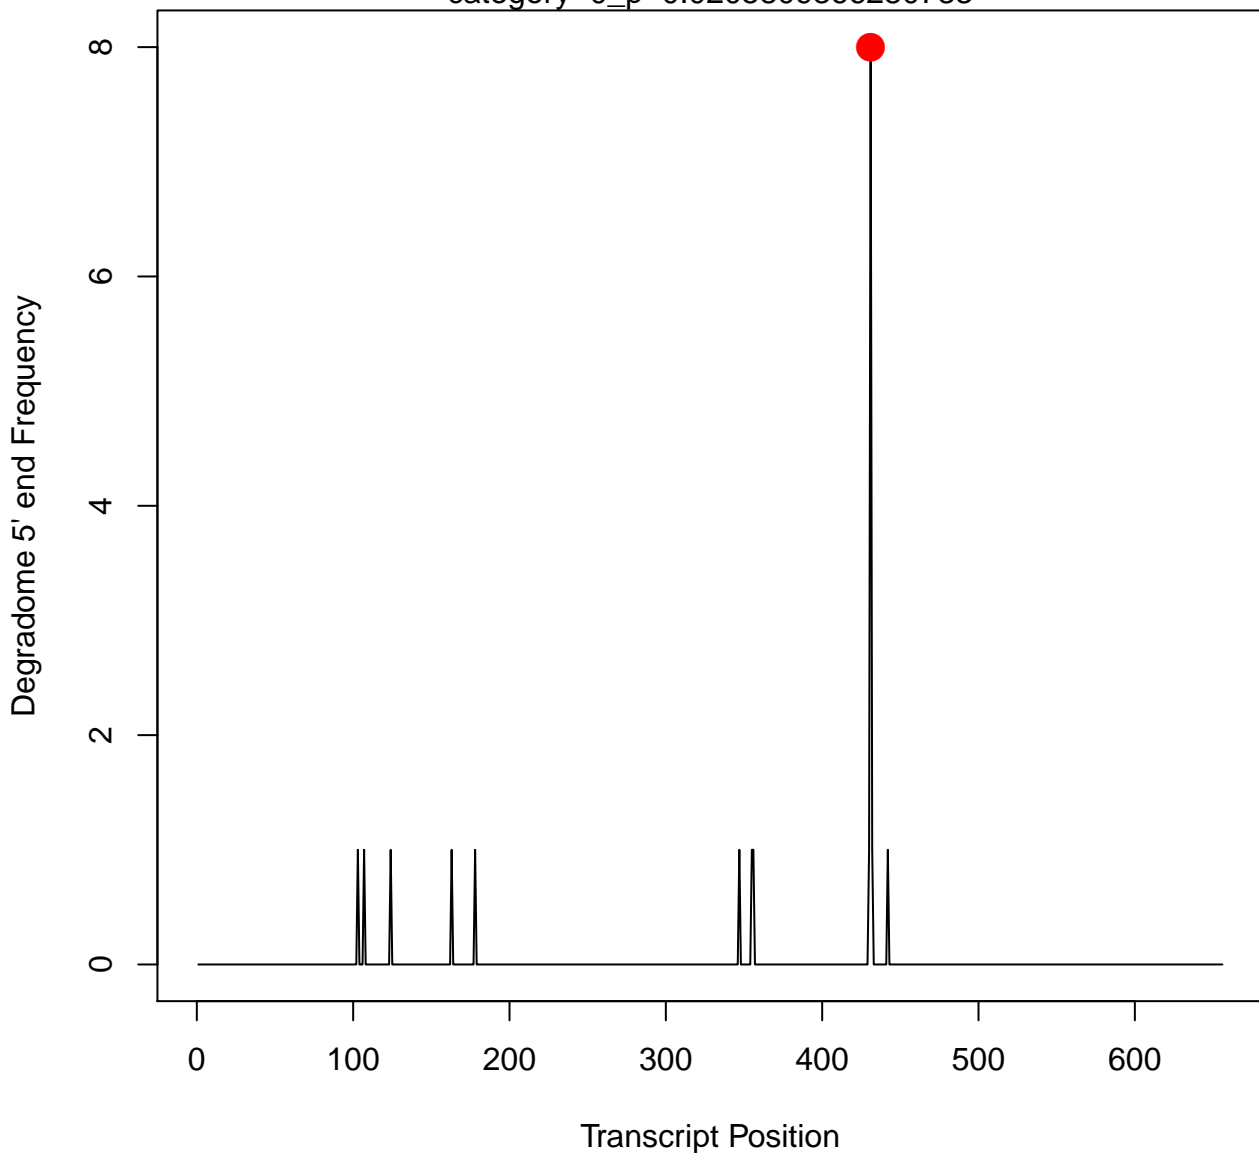

Supplement: s1 [file s1]

**T=Cluster-6586.0\_Q=novel\_25\_S=274**

category=0\_p=0.0235244583934175

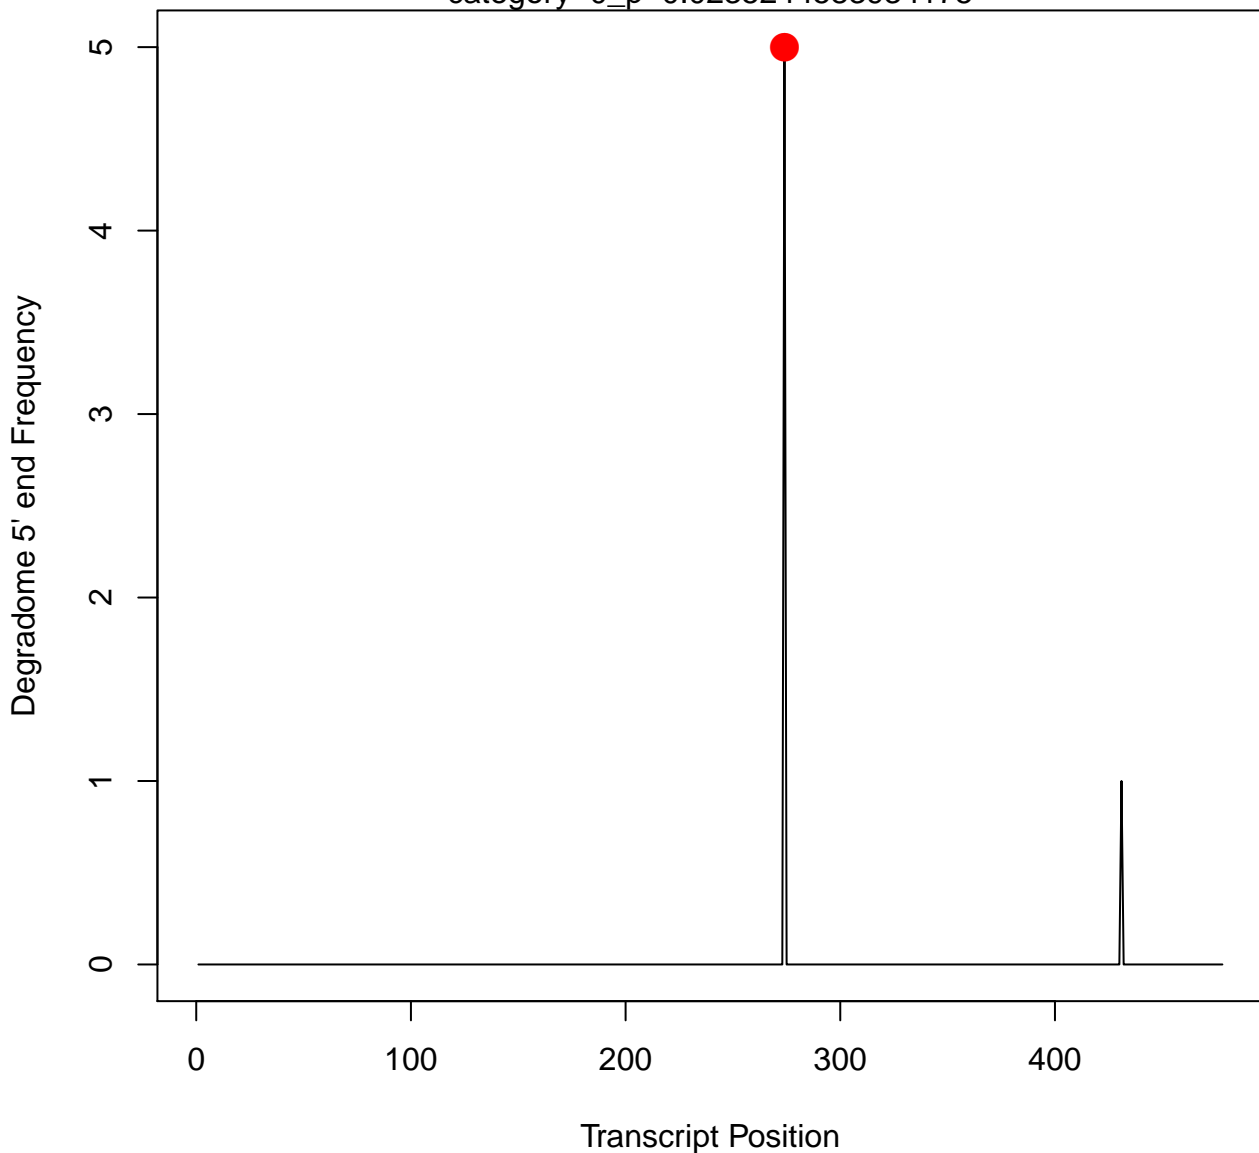

Supplement: s1 [file s1]

**T=Cluster-18410.87053\_Q=novel\_35\_S=191**

category=0\_p=0.00790379146763054

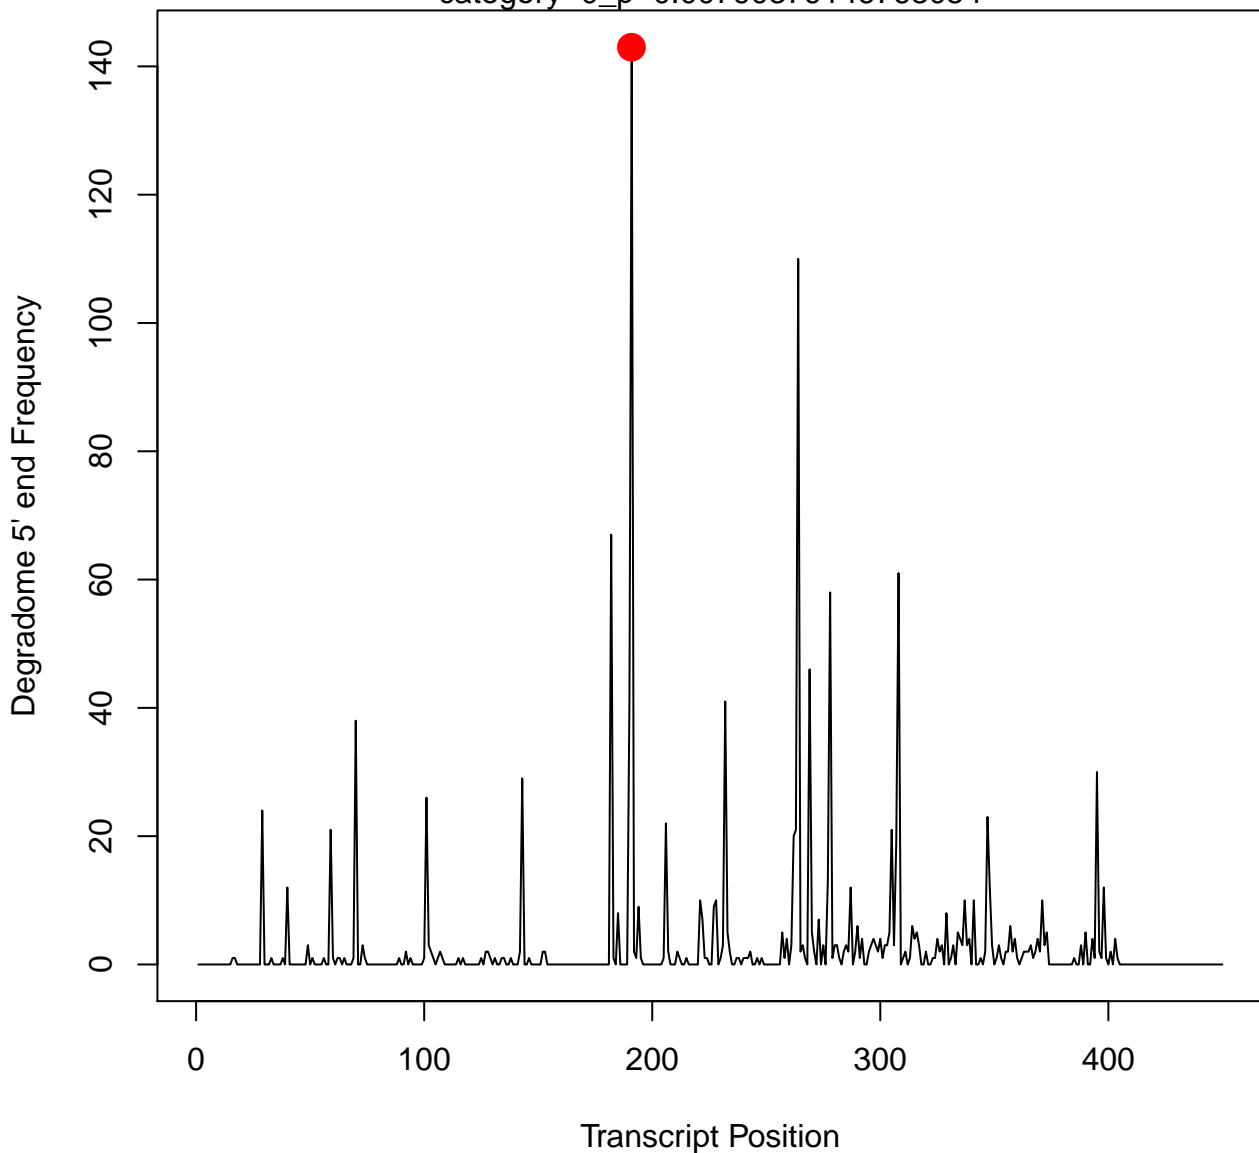

Supplement: s1 [file s1]

**T=Cluster-18410.68707\_Q=novel\_195\_S=266**

category=0\_p=0.0291193662351604

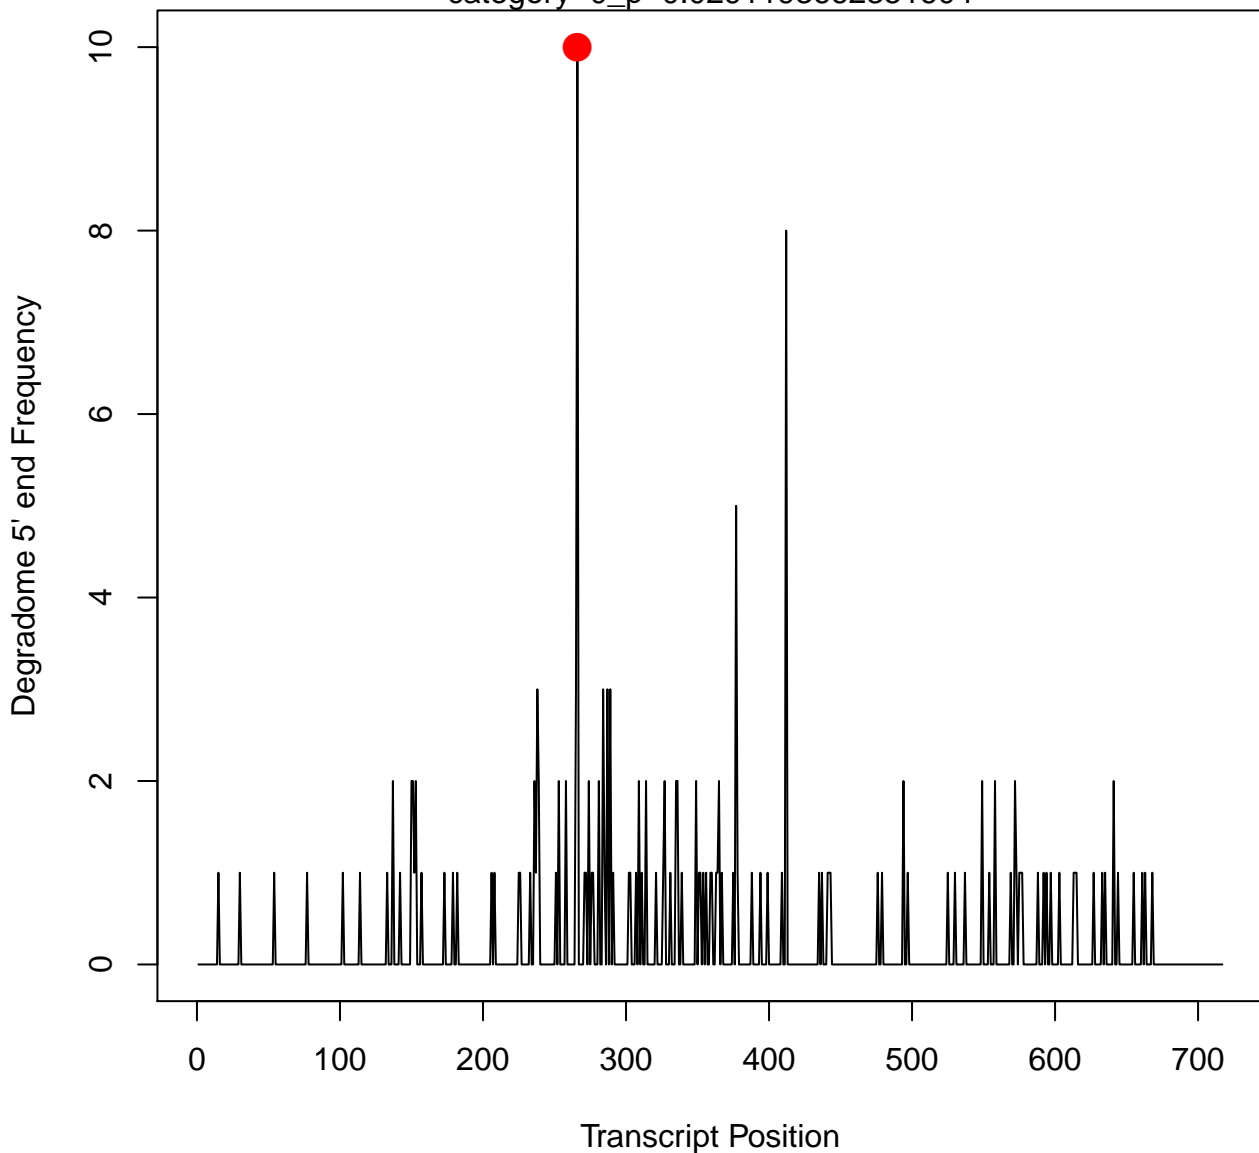

Supplement: s1 [file s1]

**T=Cluster-18410.10806\_Q=novel\_74\_S=680**

category=0\_p=0.000547104903662499

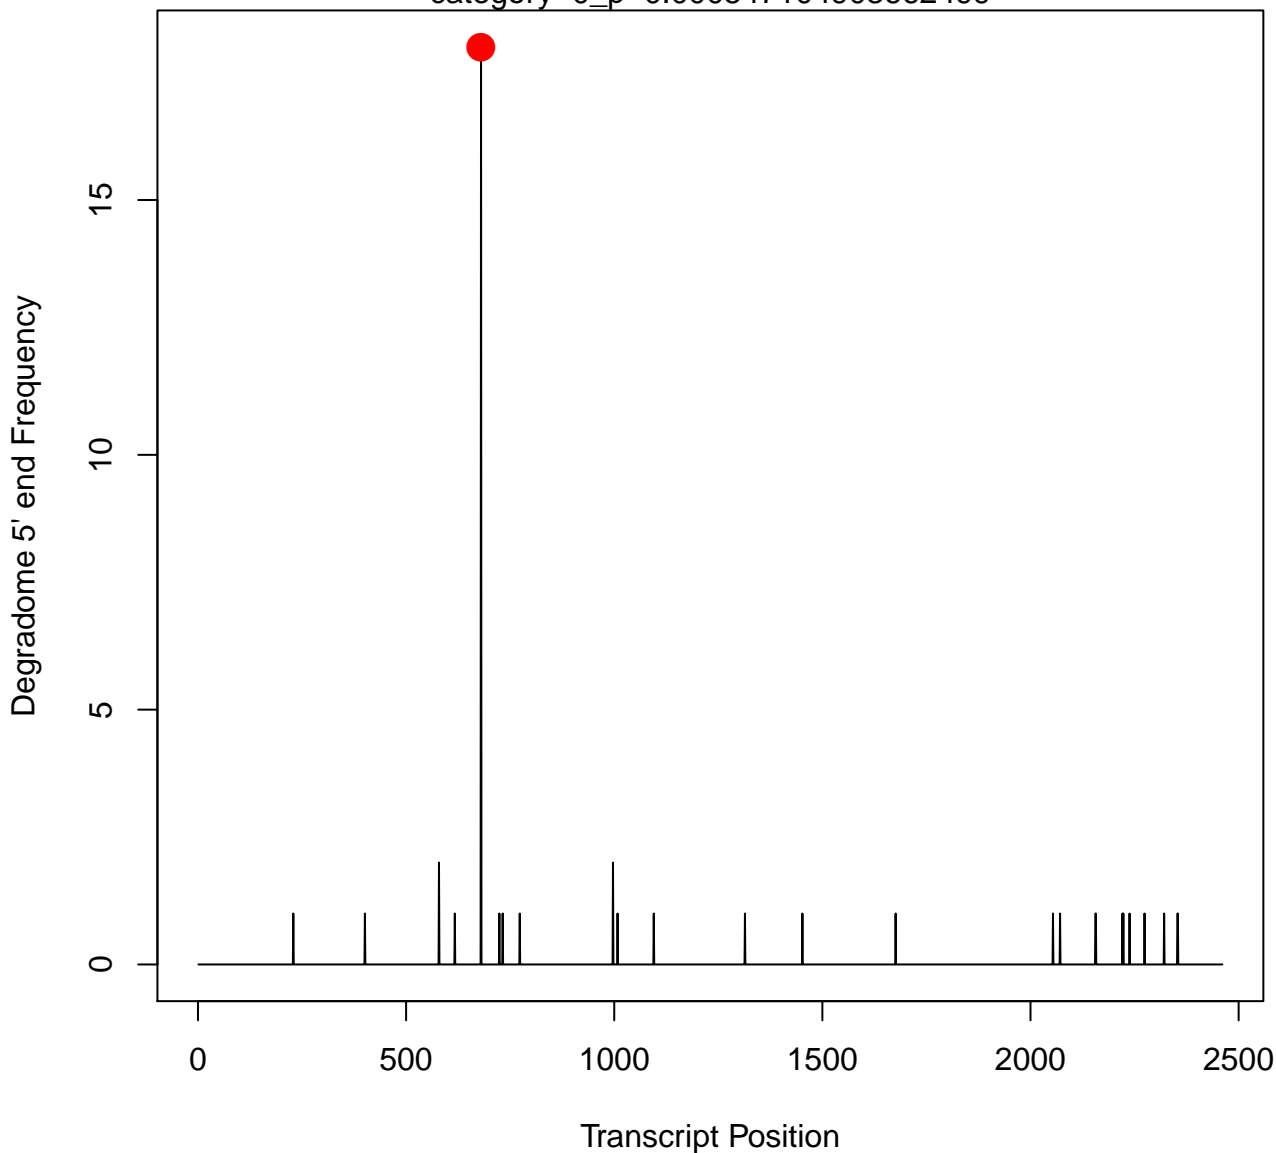

Supplement: s1 [file s1]

**T=Cluster-18410.89764\_Q=novel\_27\_S=203**

category=0\_p=0.00136720107825572

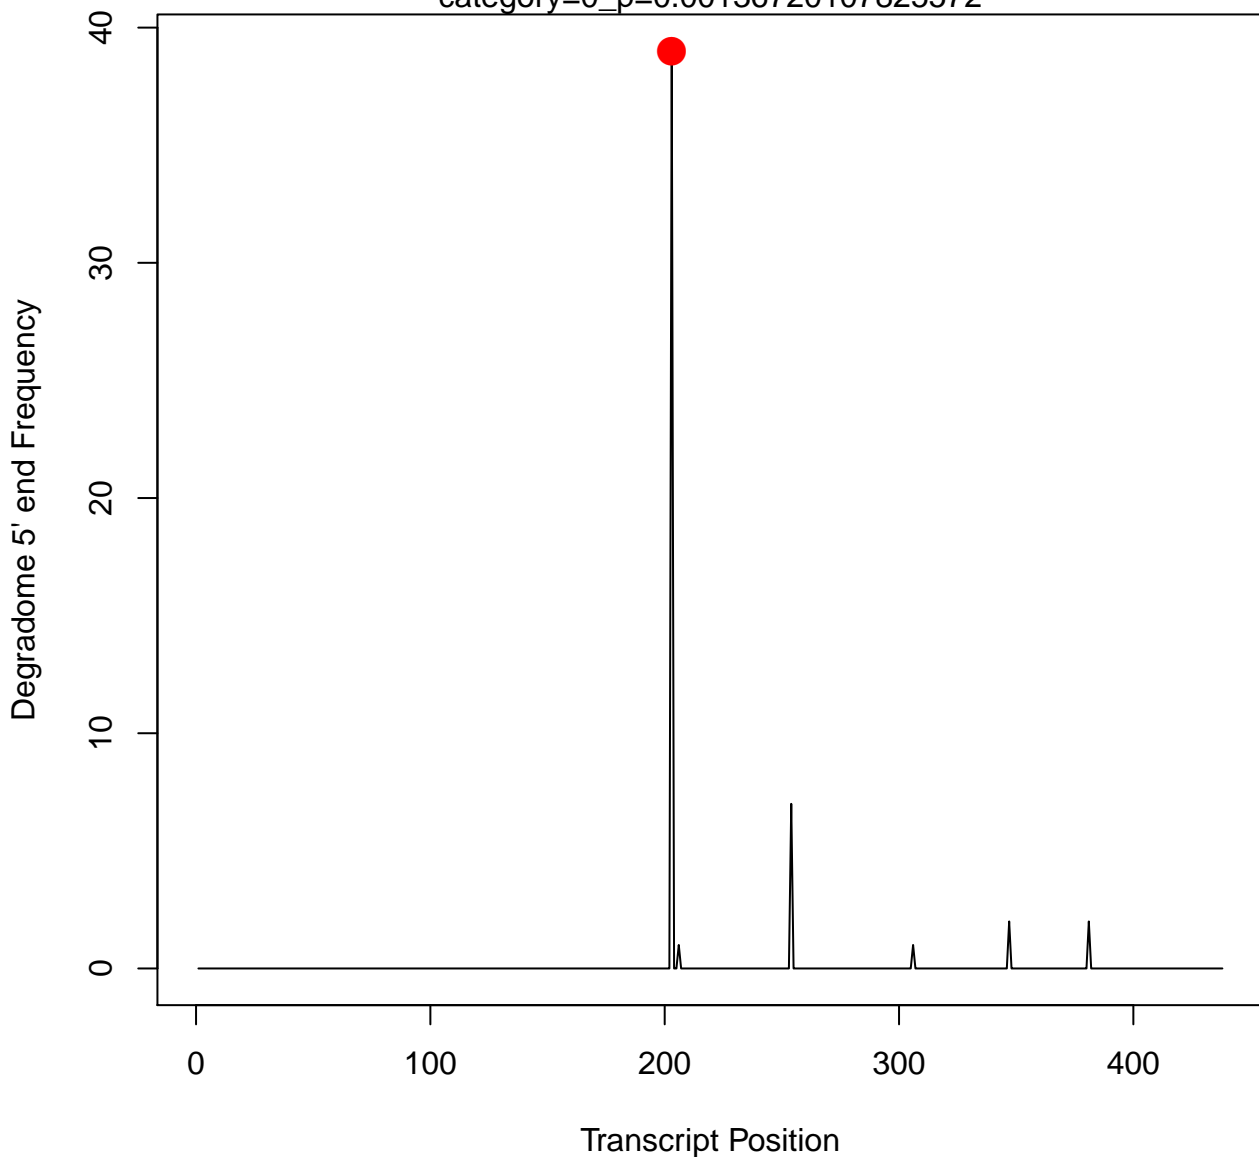

Supplement: s1 [file s1]

**T=Cluster-18410.41732\_Q=novel\_82\_S=256**

category=0\_p=0.000820545098840553

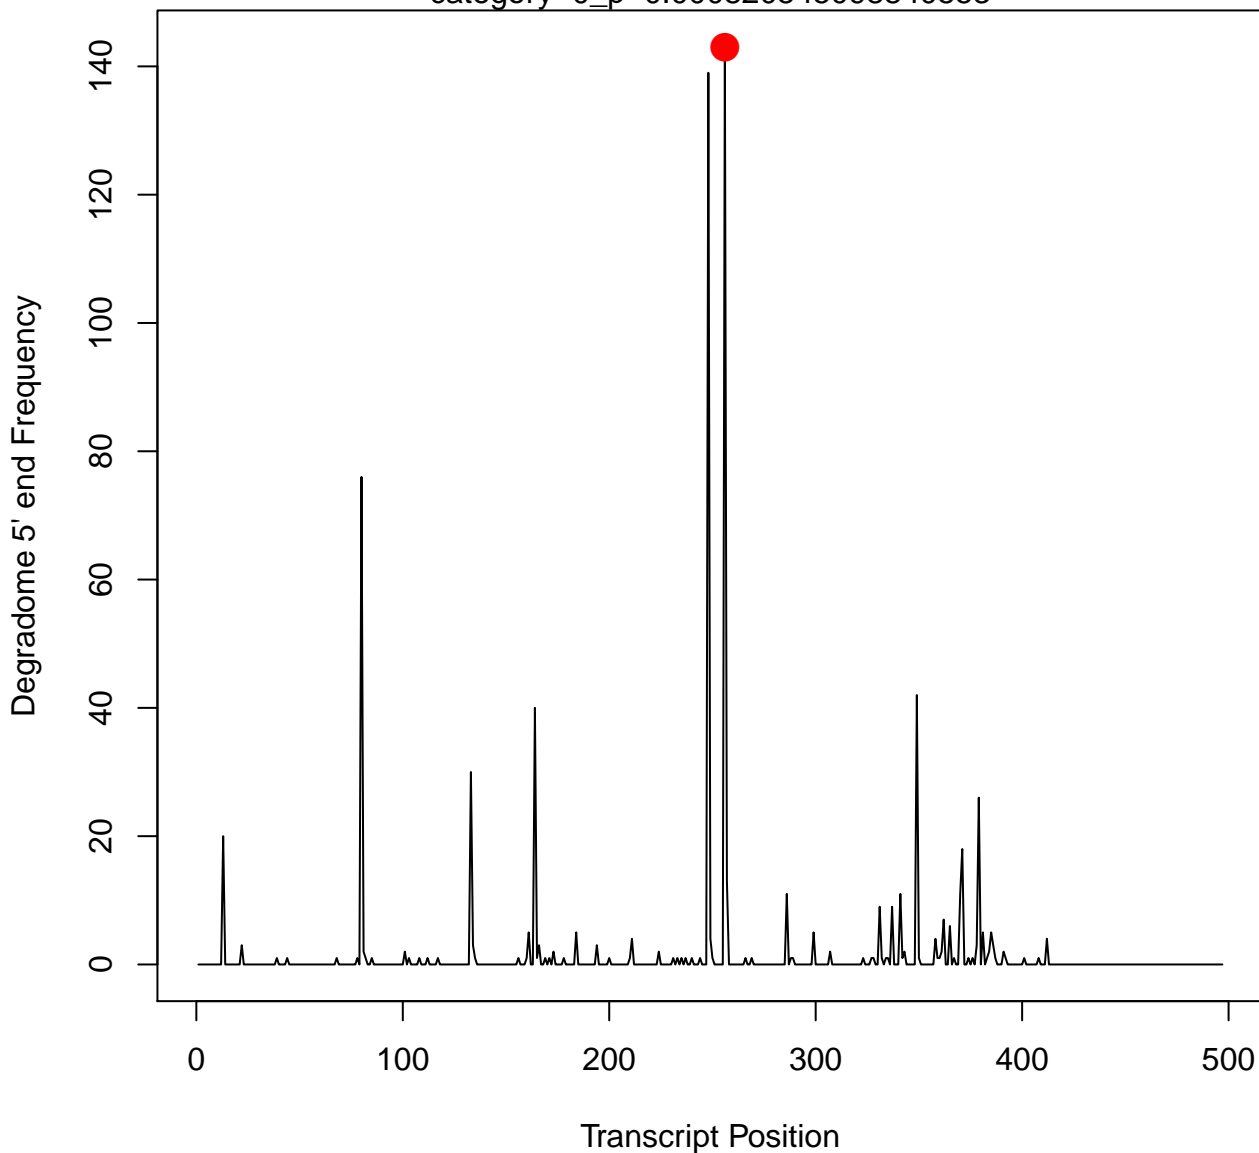

Supplement: s1 [file s1]

**T=Cluster-18410.101866\_Q=novel\_174\_S=464**

category=0\_p=0.00953124285792795

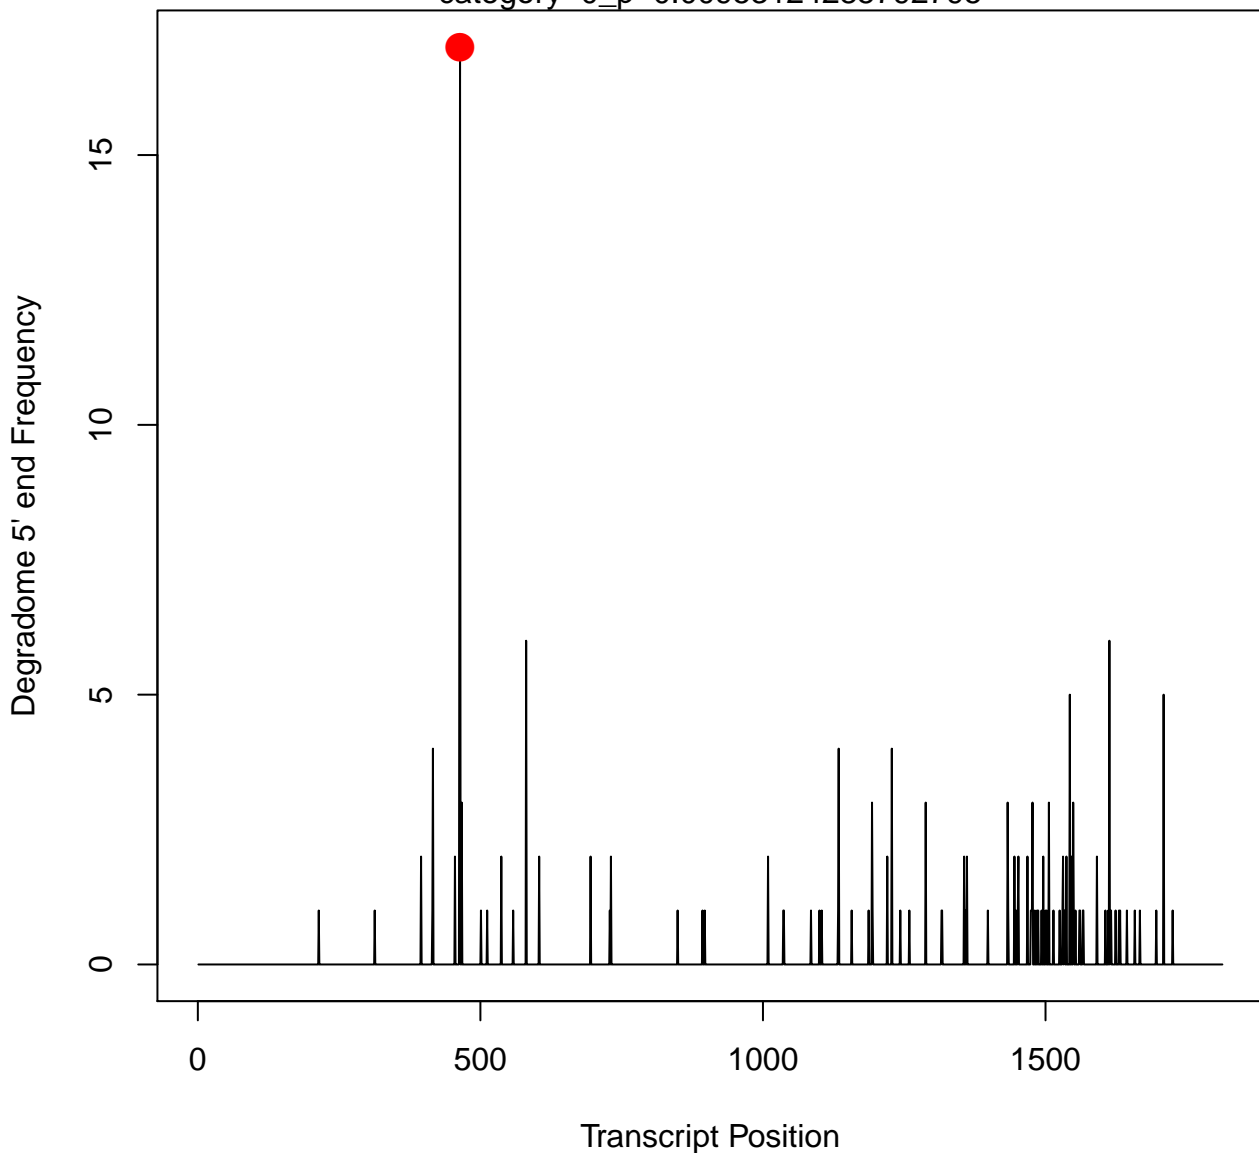

Supplement: s1 [file s1]

**T=Cluster-6417.2\_Q=pma-miR946a-3p\_S=399**

category=0\_p=0.00654553945797942

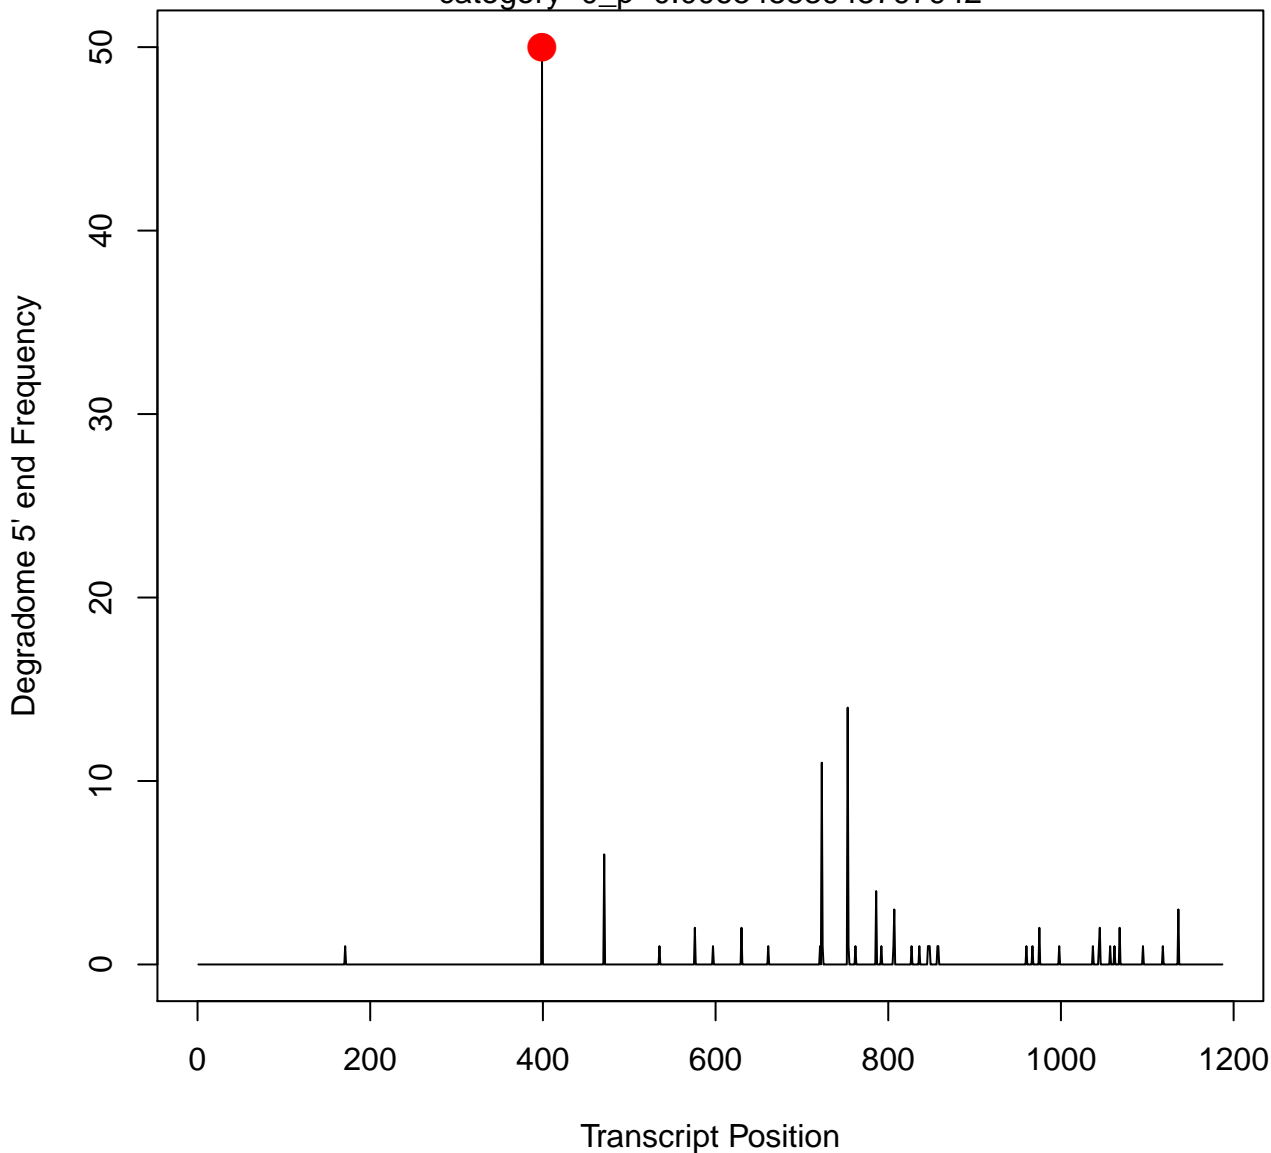

Supplement: s1 [file s1]

**T=Cluster-18410.108840\_Q=novel\_115\_S=500**

category=0\_p=0.00355083585007077

Degradome 5' end Frequency

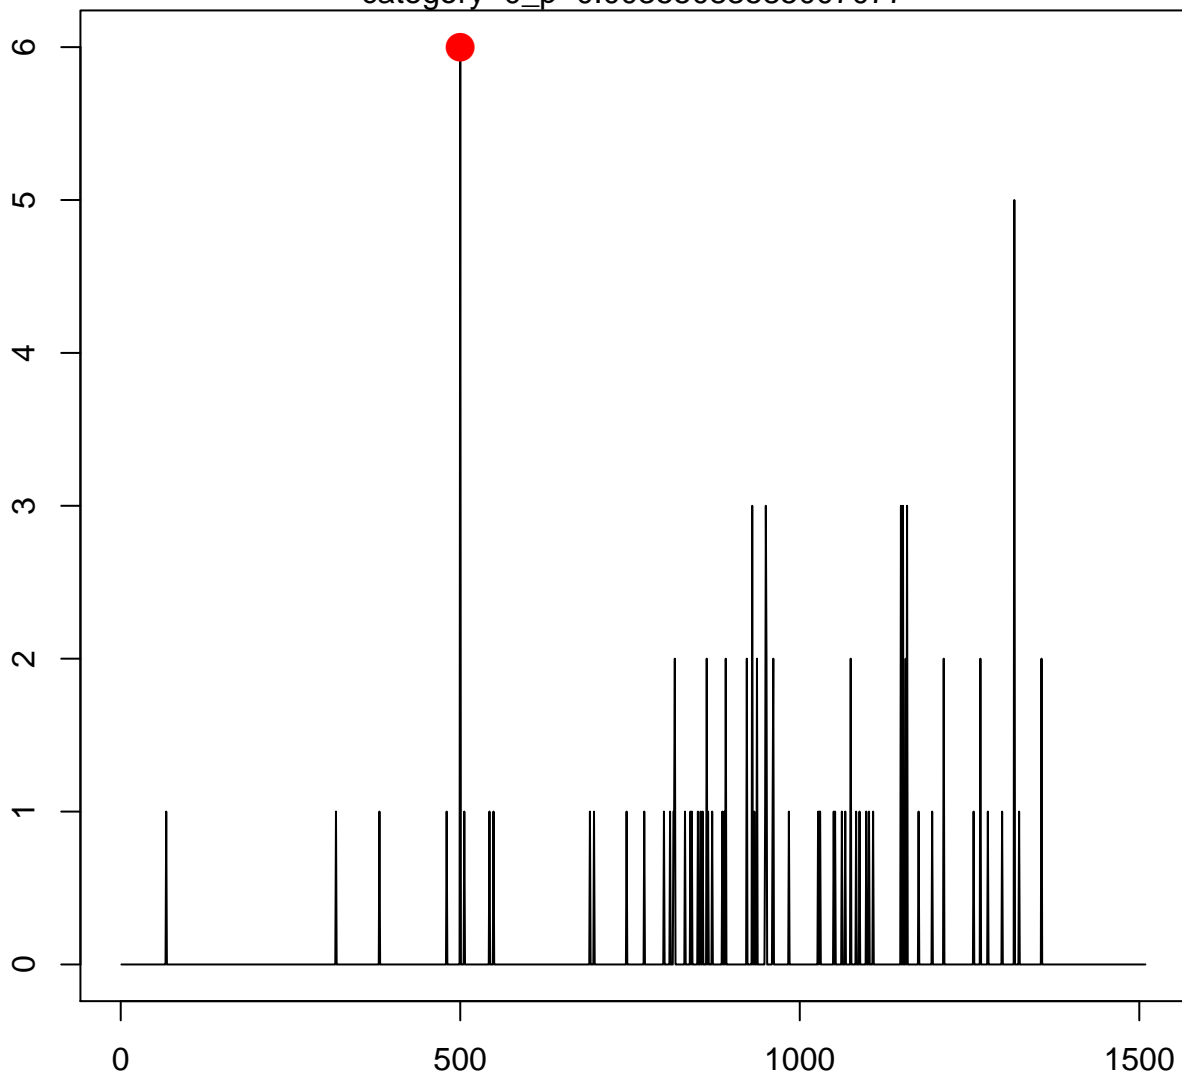

Transcript Position

Supplement: s1 [file s1]

**T=Cluster-18410.49236\_Q=novel\_46\_S=537**

category=2\_p=0.0564267304887326

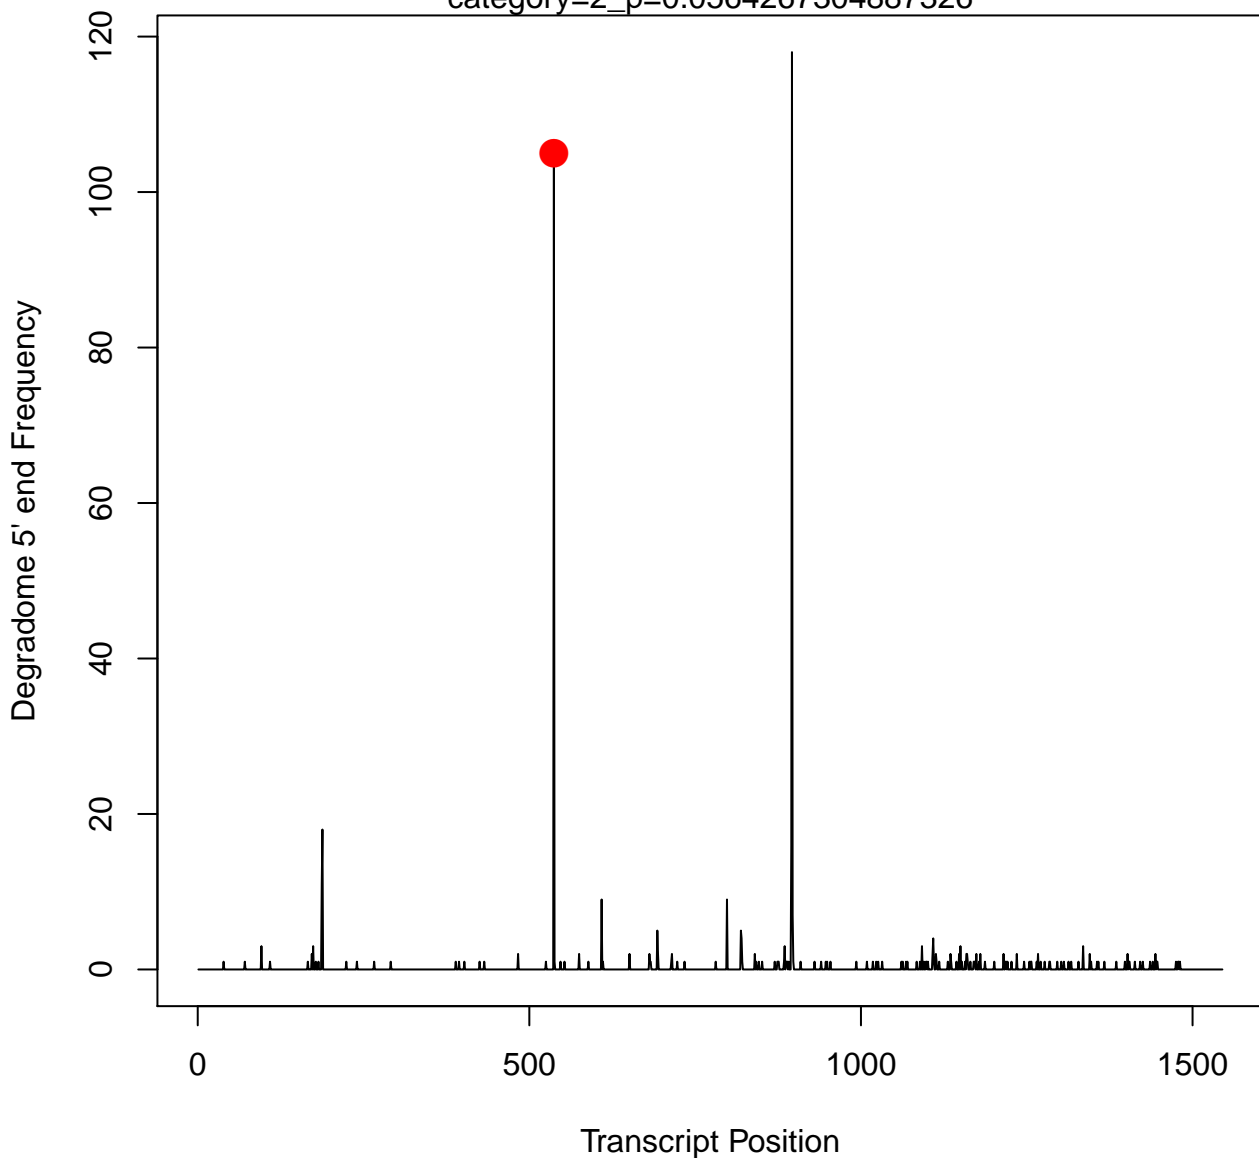

Supplement: s1 [file s1]

**T=Cluster-18410.73419\_Q=novel\_92\_S=1751**

category=0\_p=0.00436846732795781

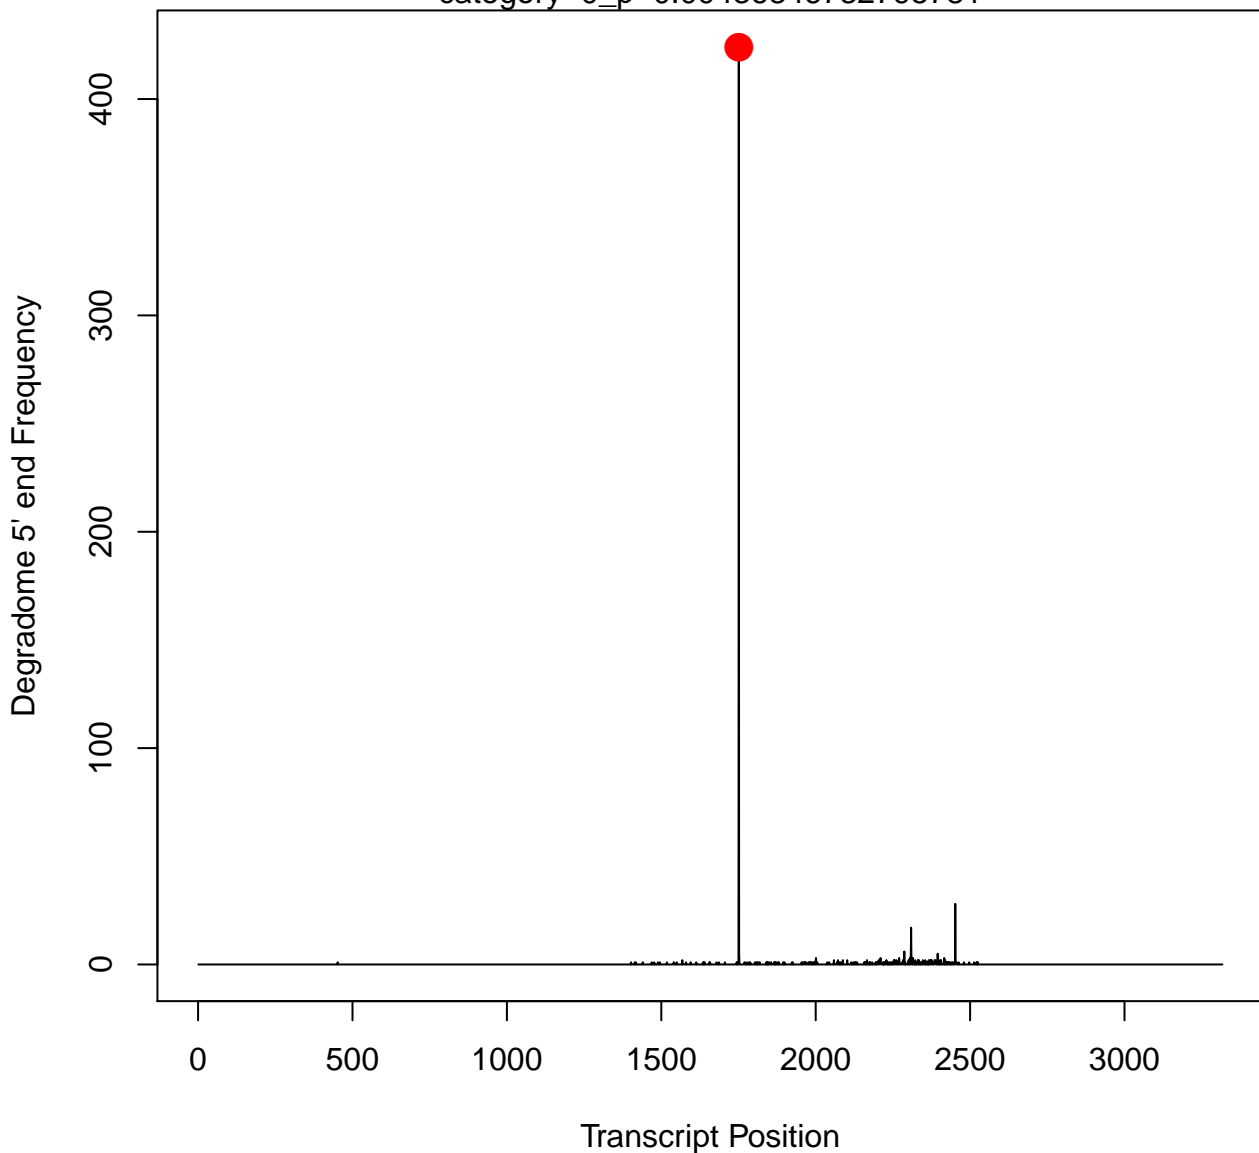

Supplement: s1 [file s1]

**T=Cluster-18410.56794\_Q=novel\_174\_S=456**

category=4\_p=0.024452609380235

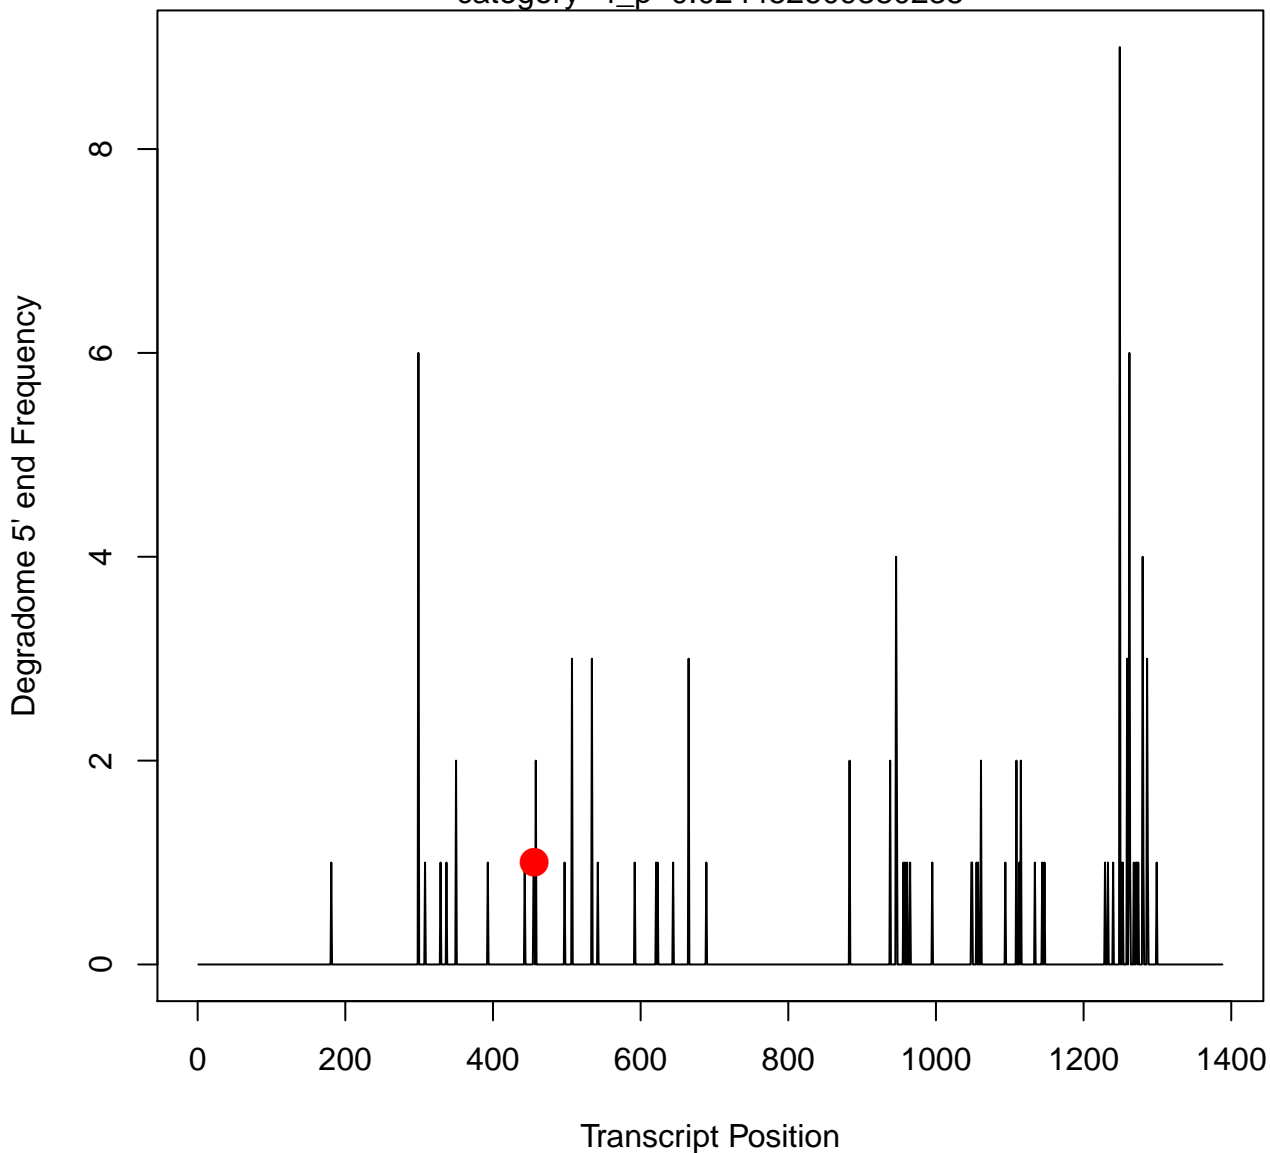

Supplement: s1 [file s1]

**T=Cluster-18410.42772\_Q=novel\_184\_S=700**

category=4\_p=0.0942809831727407

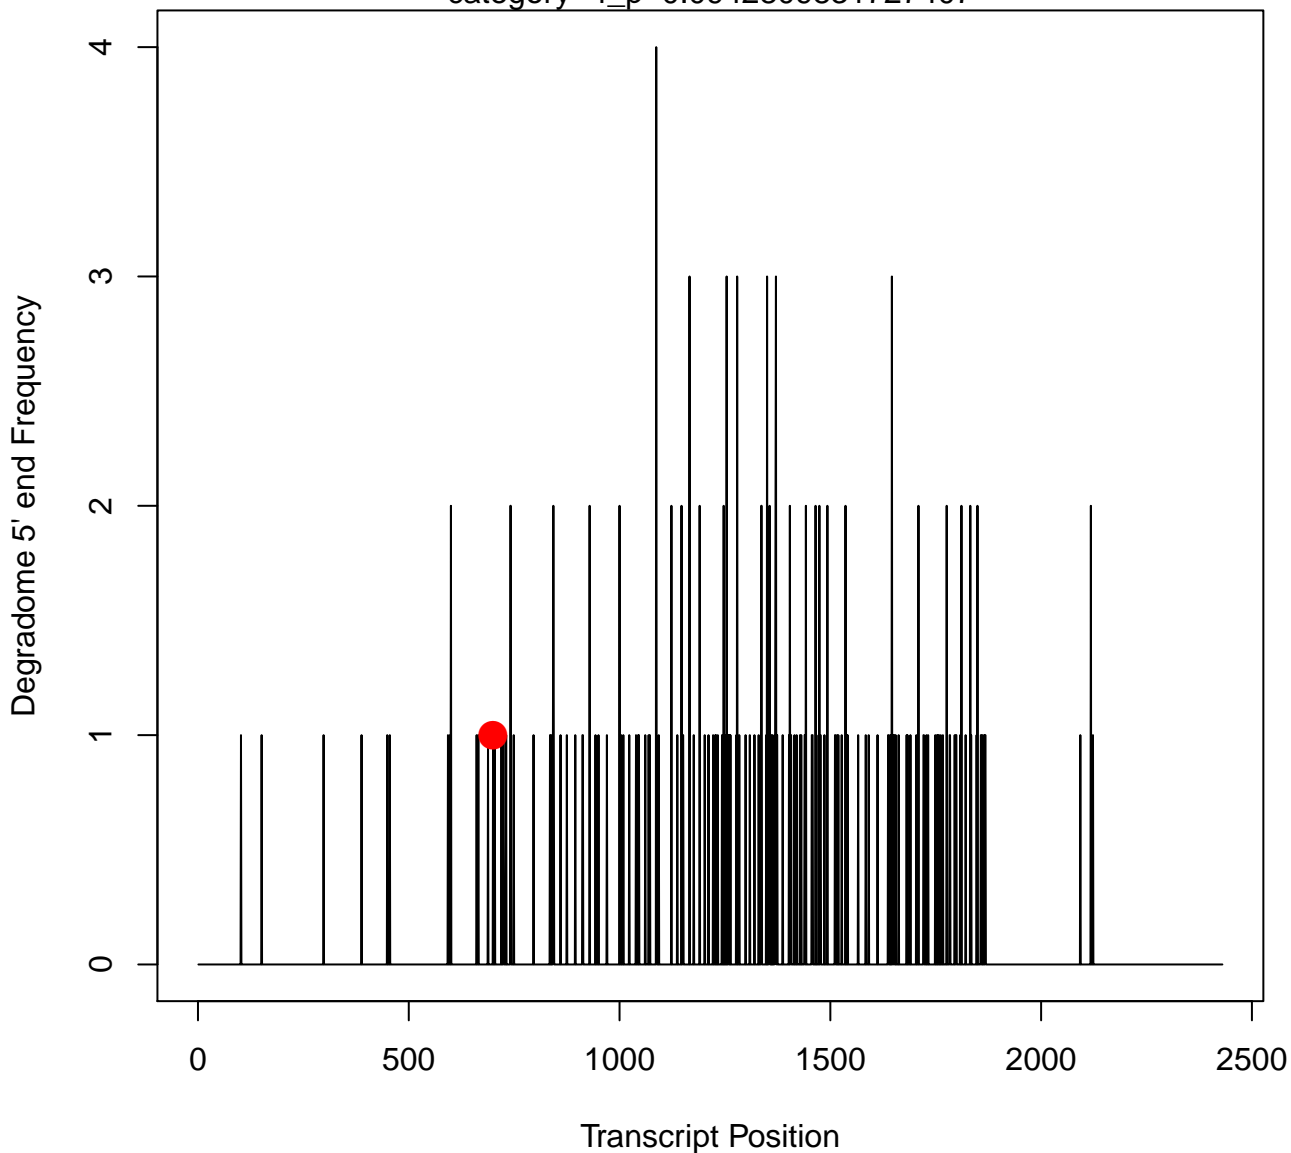

Supplement: s1 [file s1]

**T=Cluster-18410.41033\_Q=novel\_156\_S=788**

category=2\_p=0.0229647072699788

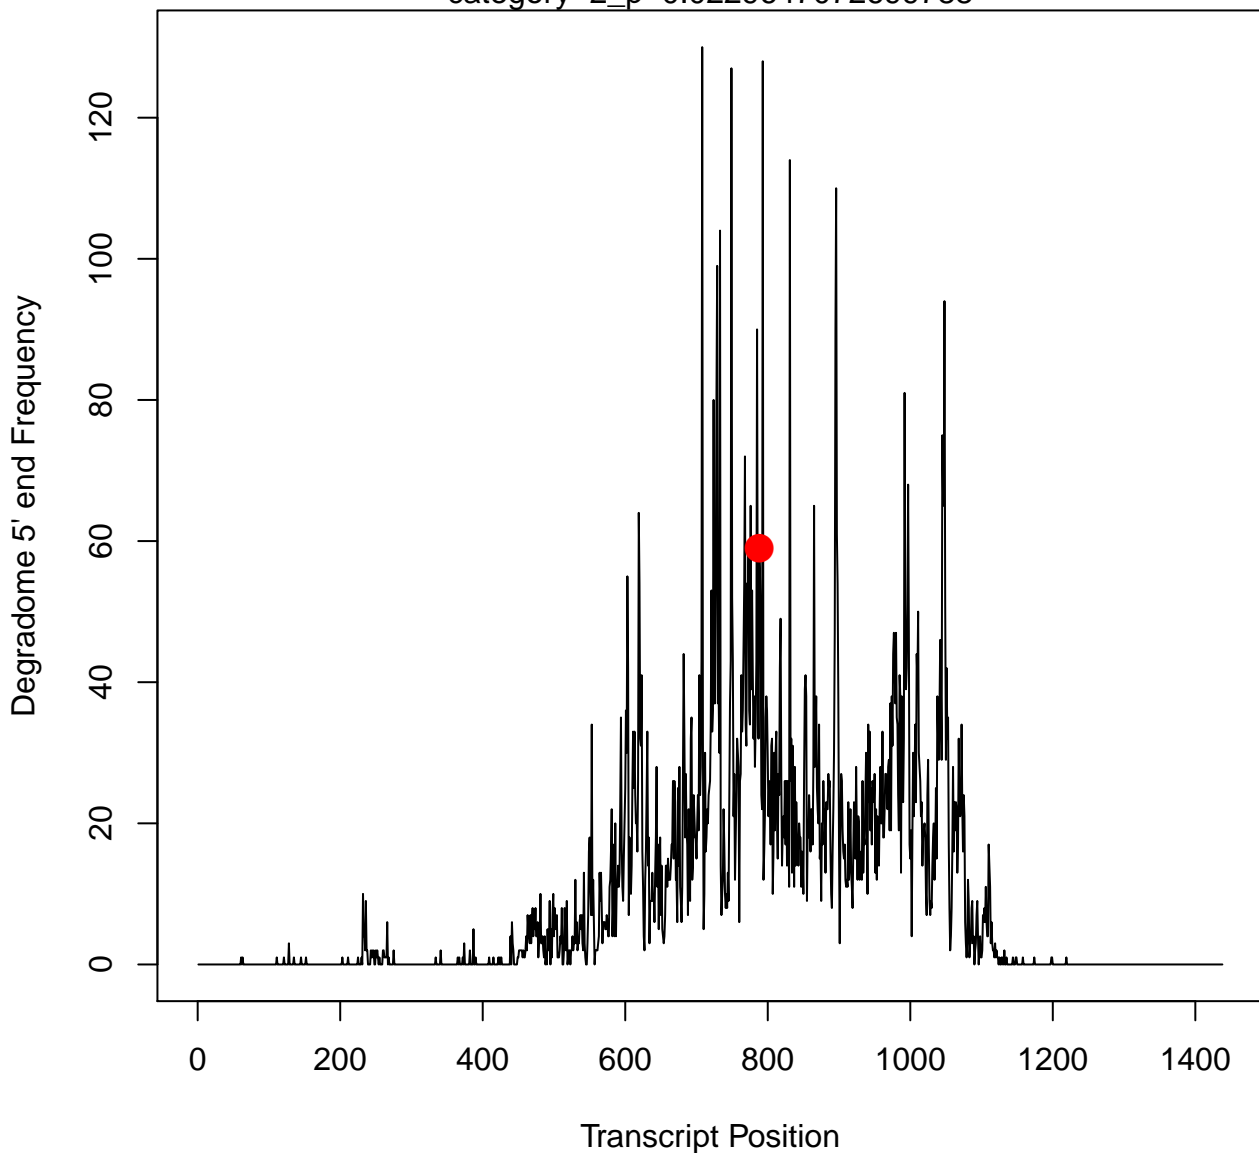

Supplement: s1 [file s1]

**T=Cluster-18410.24960\_Q=pma-miR482a\_S=363**

category=0\_p=0.00355083585007077

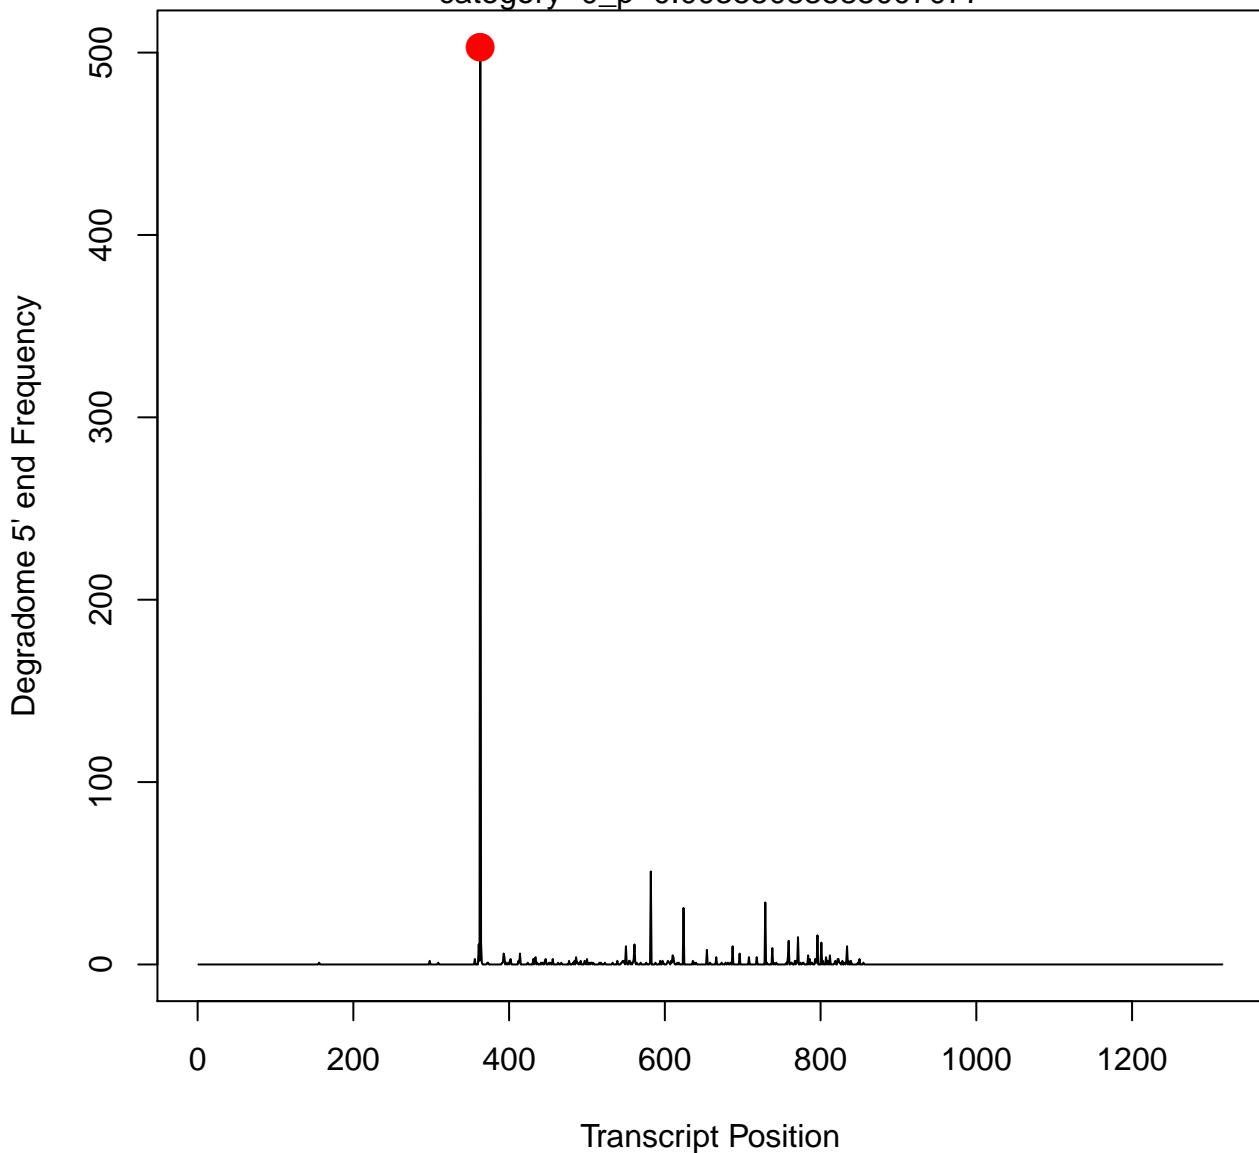

Supplement: s1 [file s1]

**T=Cluster-18410.1906\_Q=pma-miR482a\_S=185**

category=0\_p=0.00871785114912016

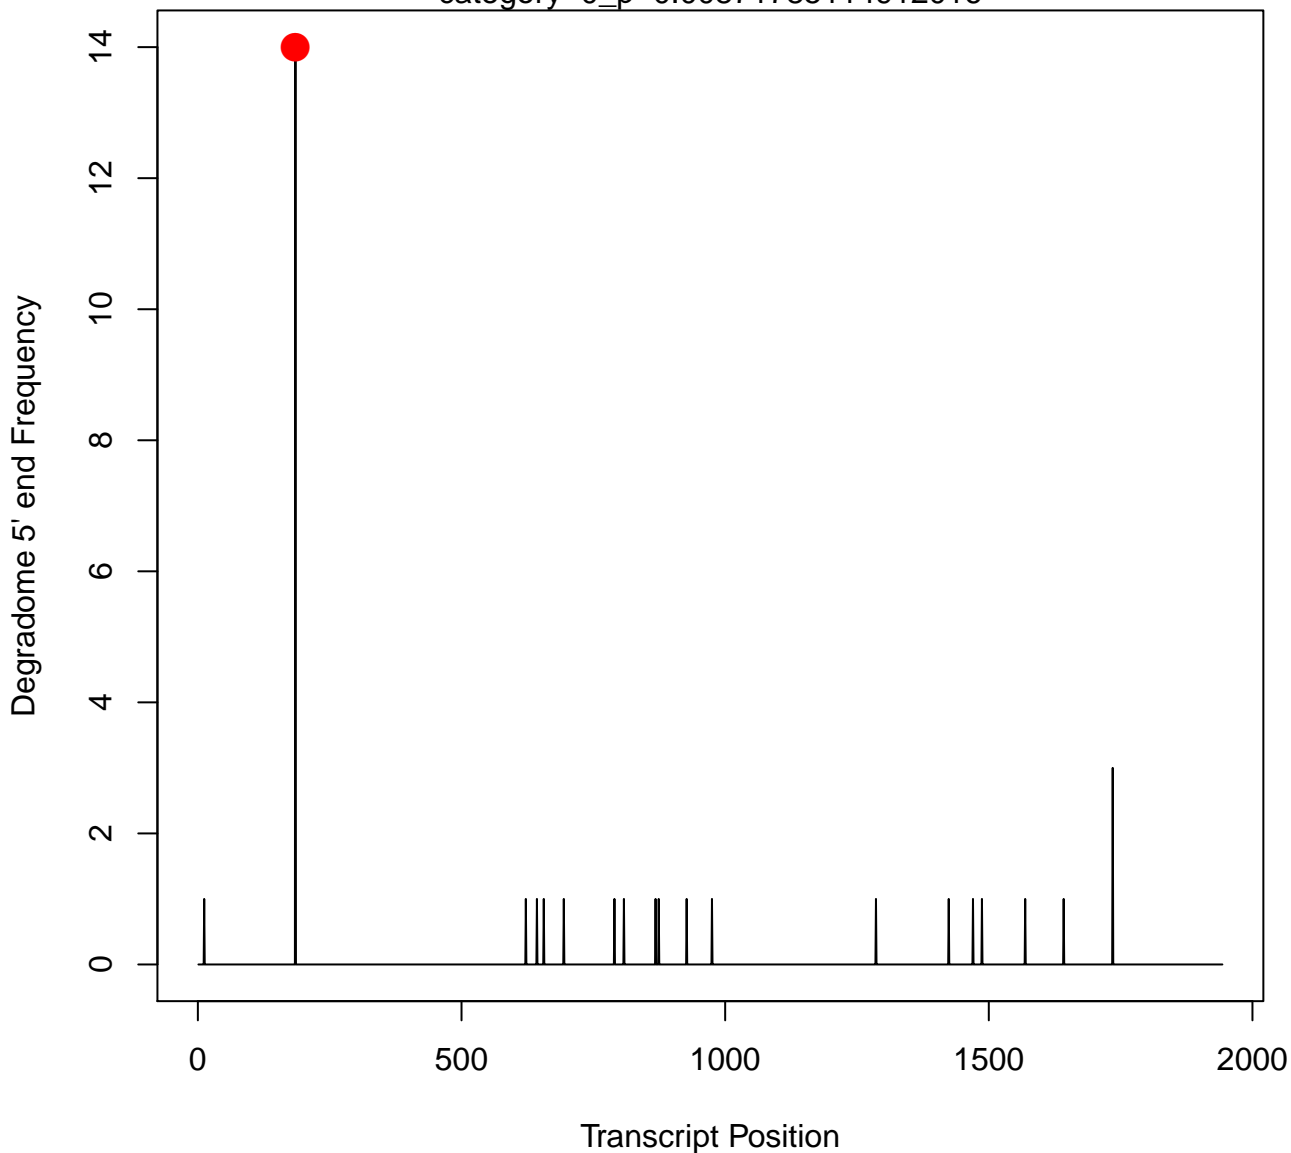

Supplement: s1 [file s1]

**T=Cluster-18410.81189\_Q=pma-miR951\_S=372**

category=0\_p=0.00273253291772324

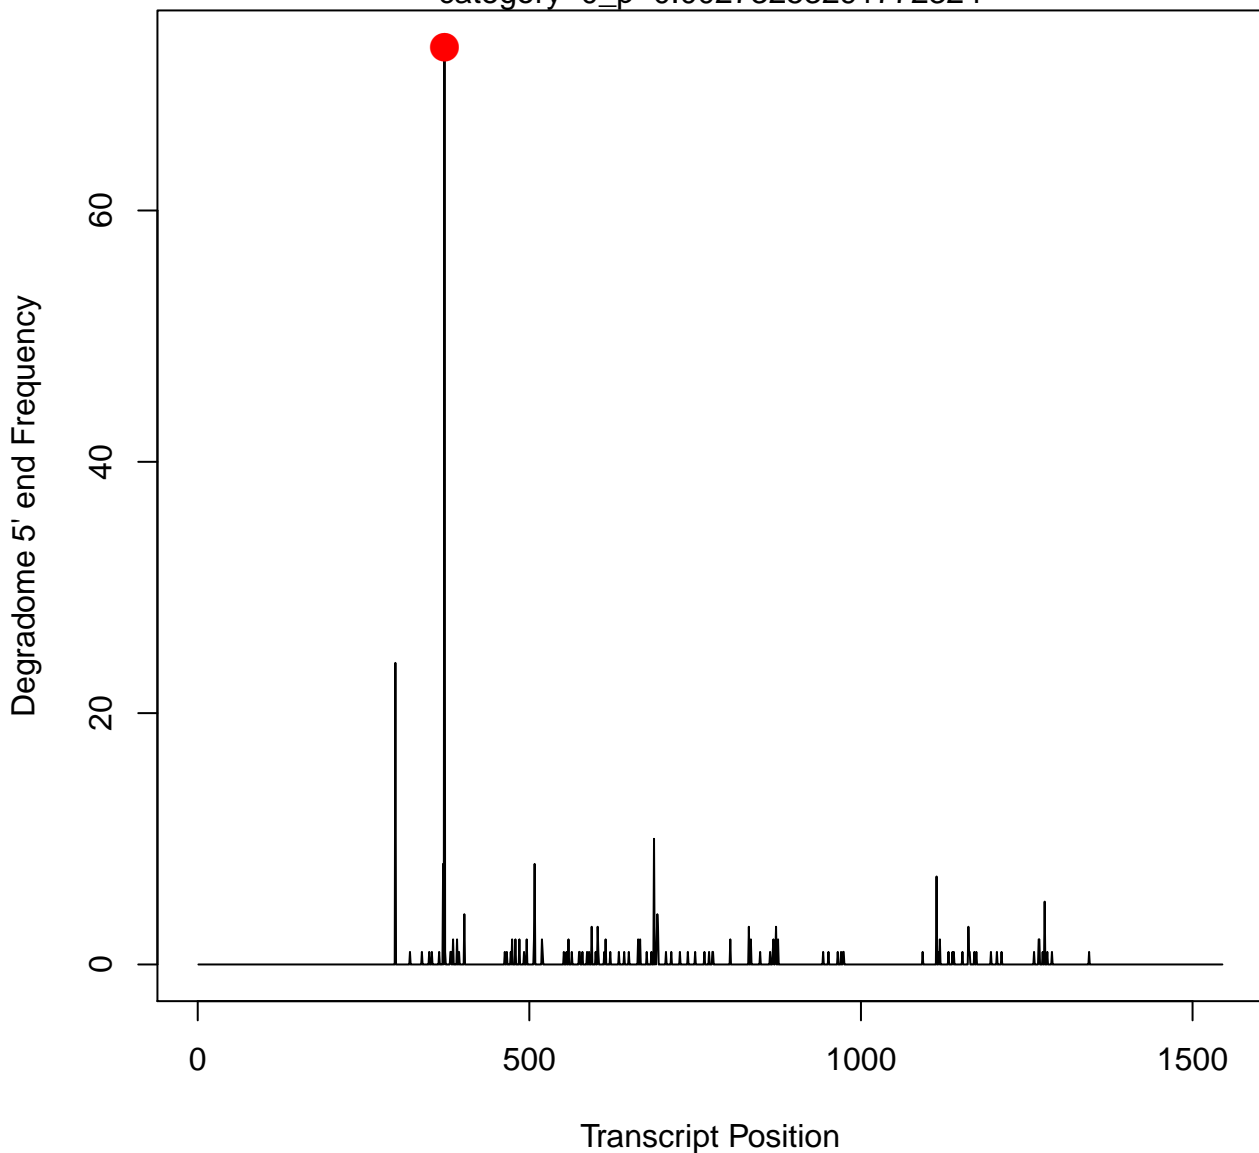

Supplement: s1 [file s1]

**T=Cluster-18410.88134\_Q=novel\_42\_S=208**

category=0\_p=0.00654553945797942

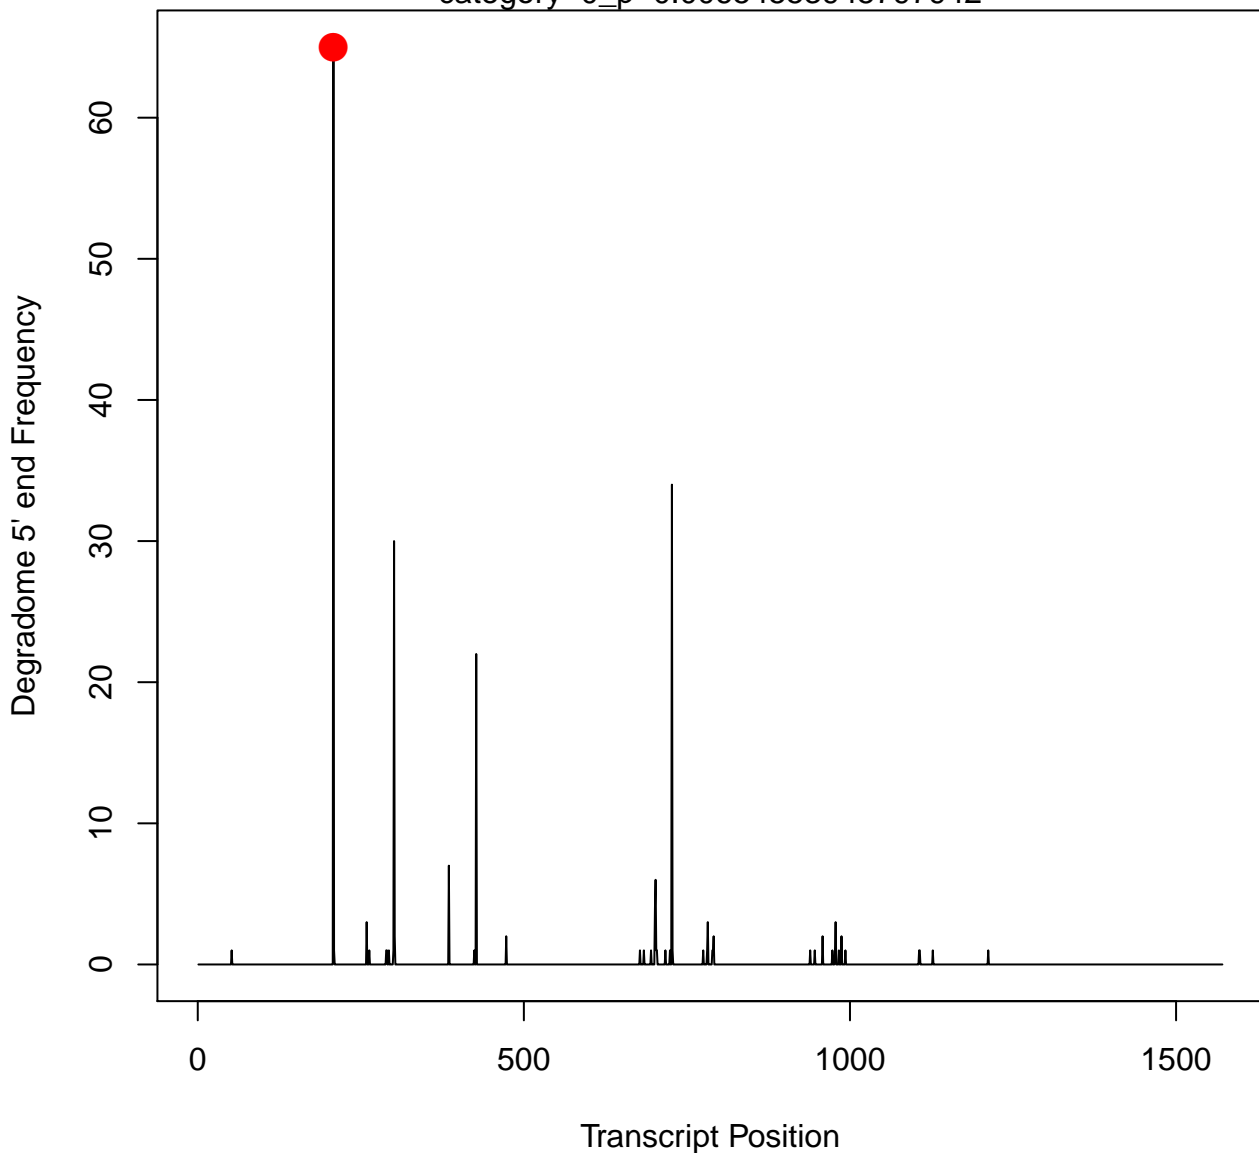

Supplement: s1 [file s1]

**T=Cluster-18410.64820\_Q=novel\_6\_S=111**

category=0\_p=0.0111560245494552

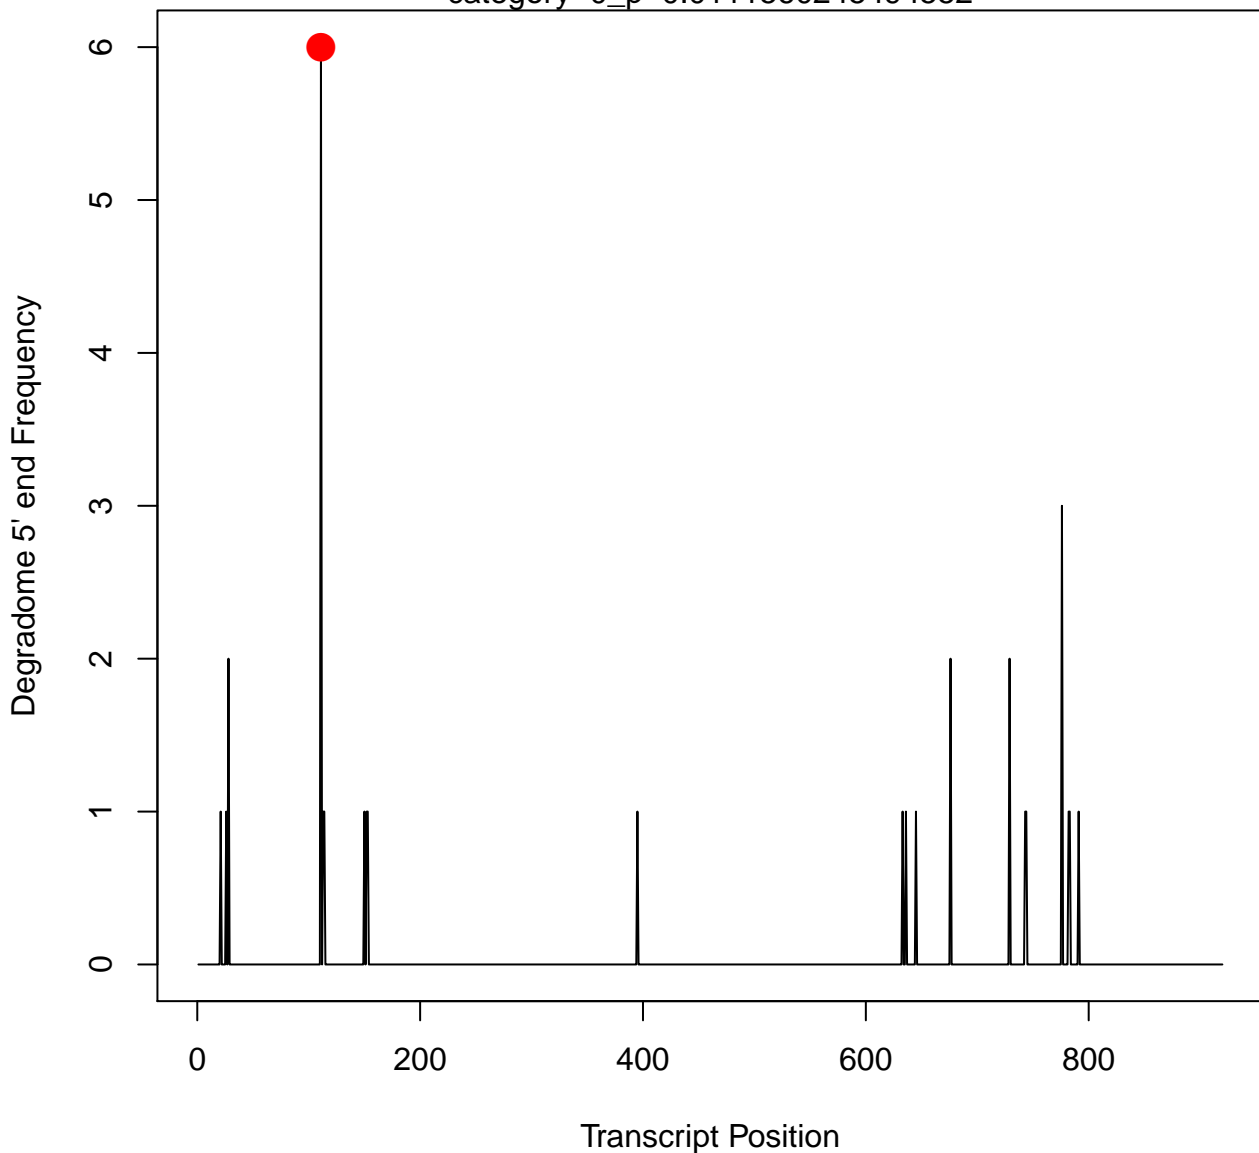

Supplement: s1 [file s1]

**T=Cluster-18410.65076\_Q=novel\_94\_S=386**

category=2\_p=0.0454020367599618

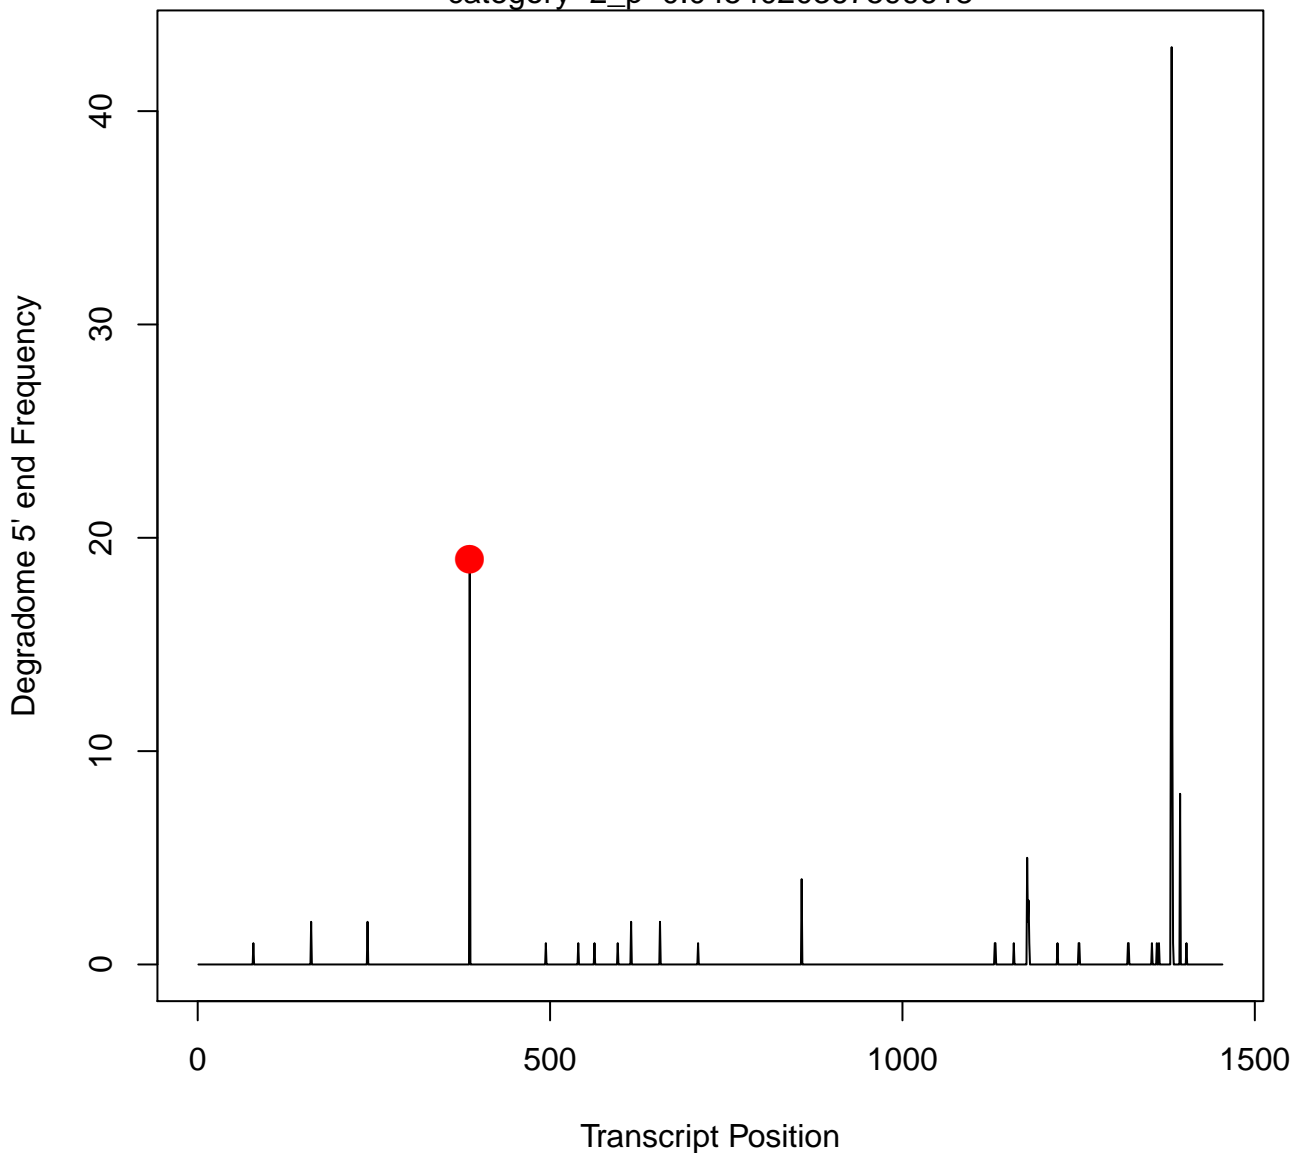

Supplement: s1 [file s1]

**T=Cluster-18410.6958\_Q=novel\_174\_S=394**

category=0\_p=0.00382345425486719

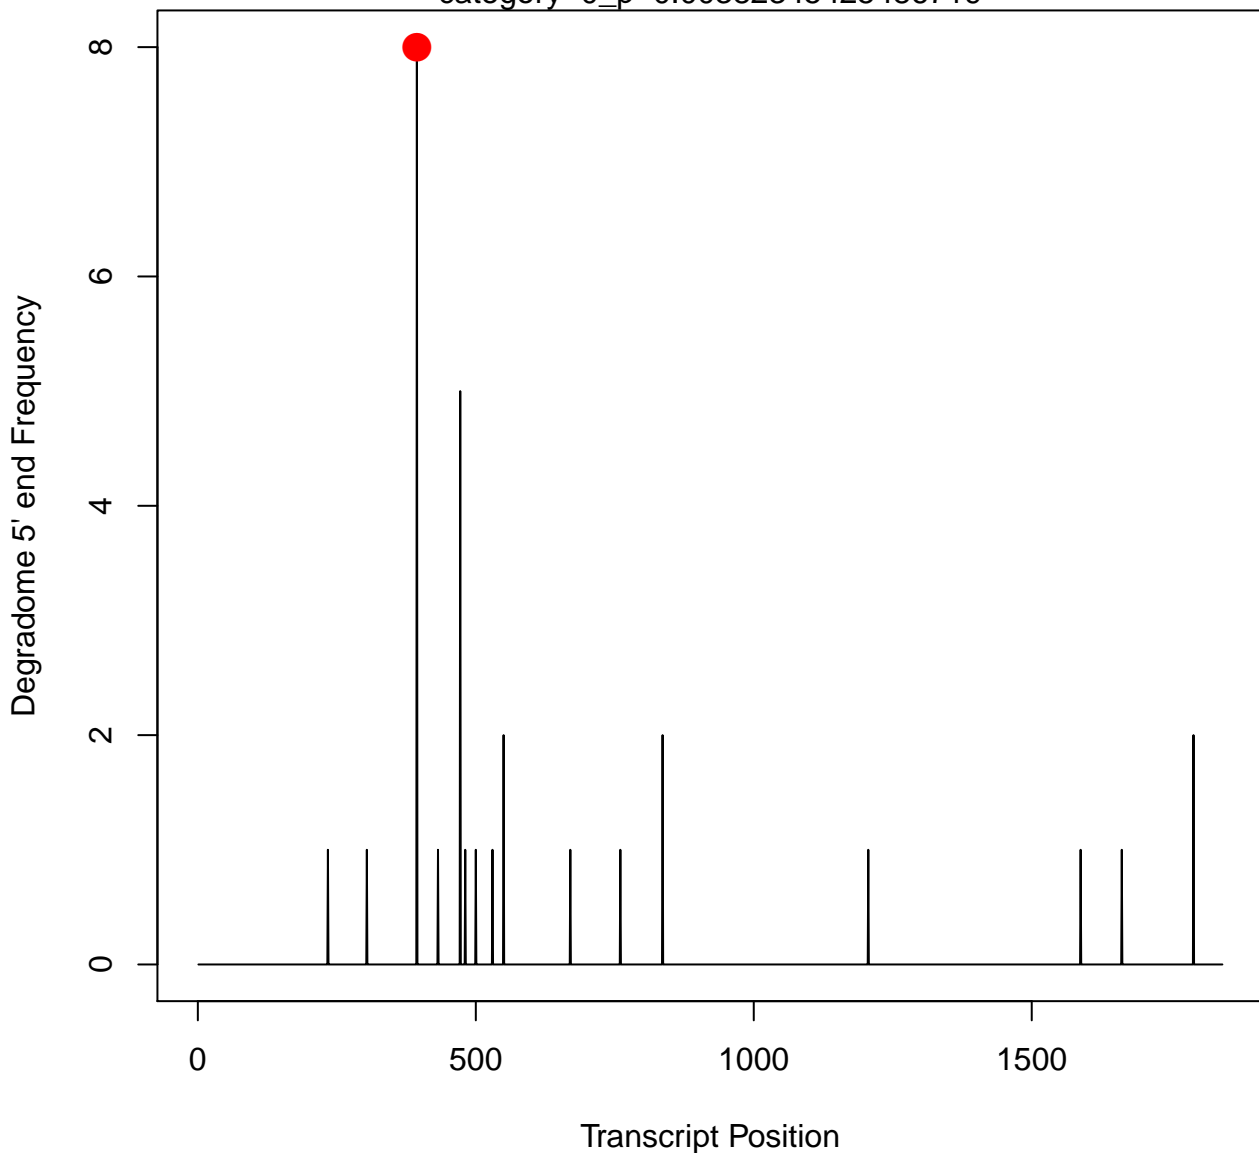

Supplement: s1 [file s1]

**T=Cluster-18410.72937\_Q=novel\_14\_S=1423**

category=0\_p=0.00436846732795781

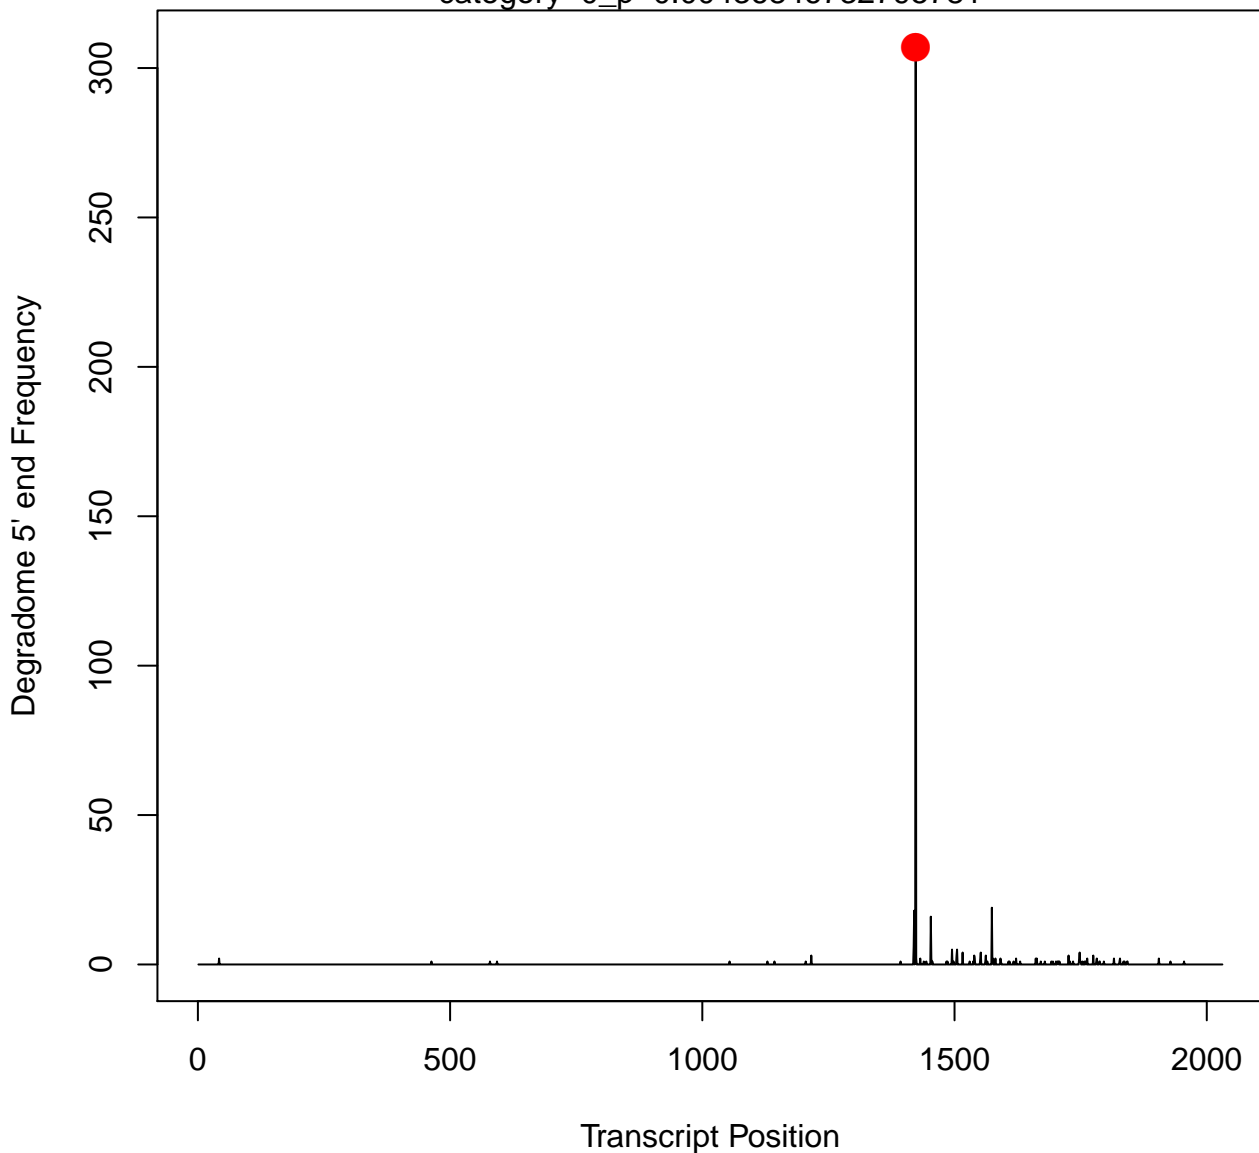

Supplement: s1 [file s1]

**T=Cluster-18410.47746\_Q=novel\_42\_S=1392**

category=0\_p=0.00355083585007077

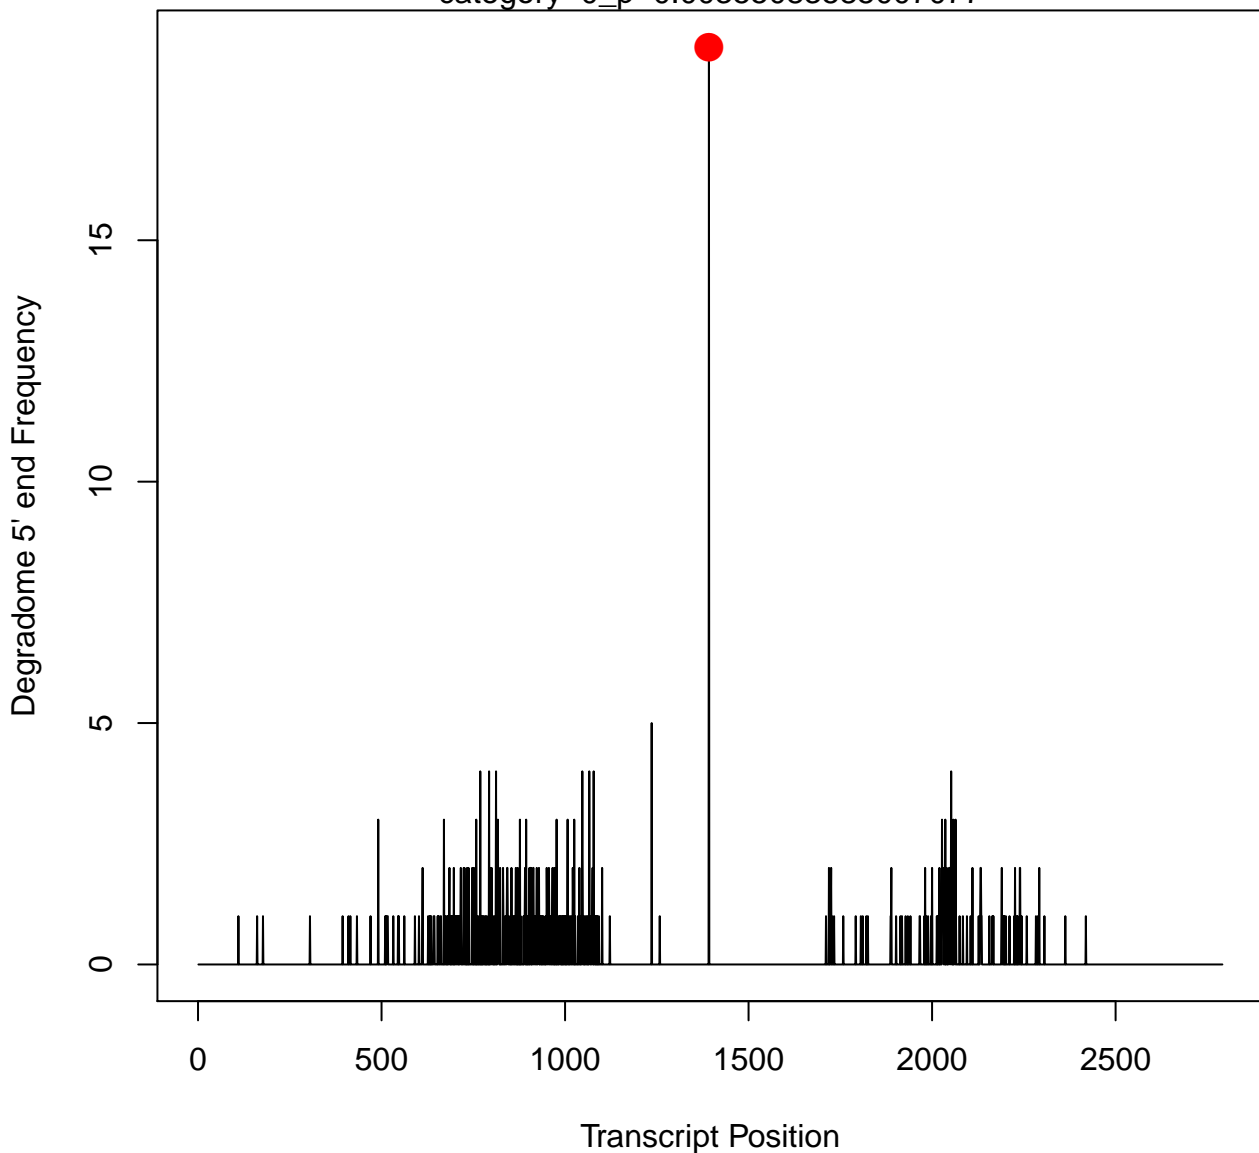

Supplement: s1 [file s1]

**T=Cluster-18410.47327\_Q=novel\_117\_S=132**

category=2\_p=0.0780956144108357

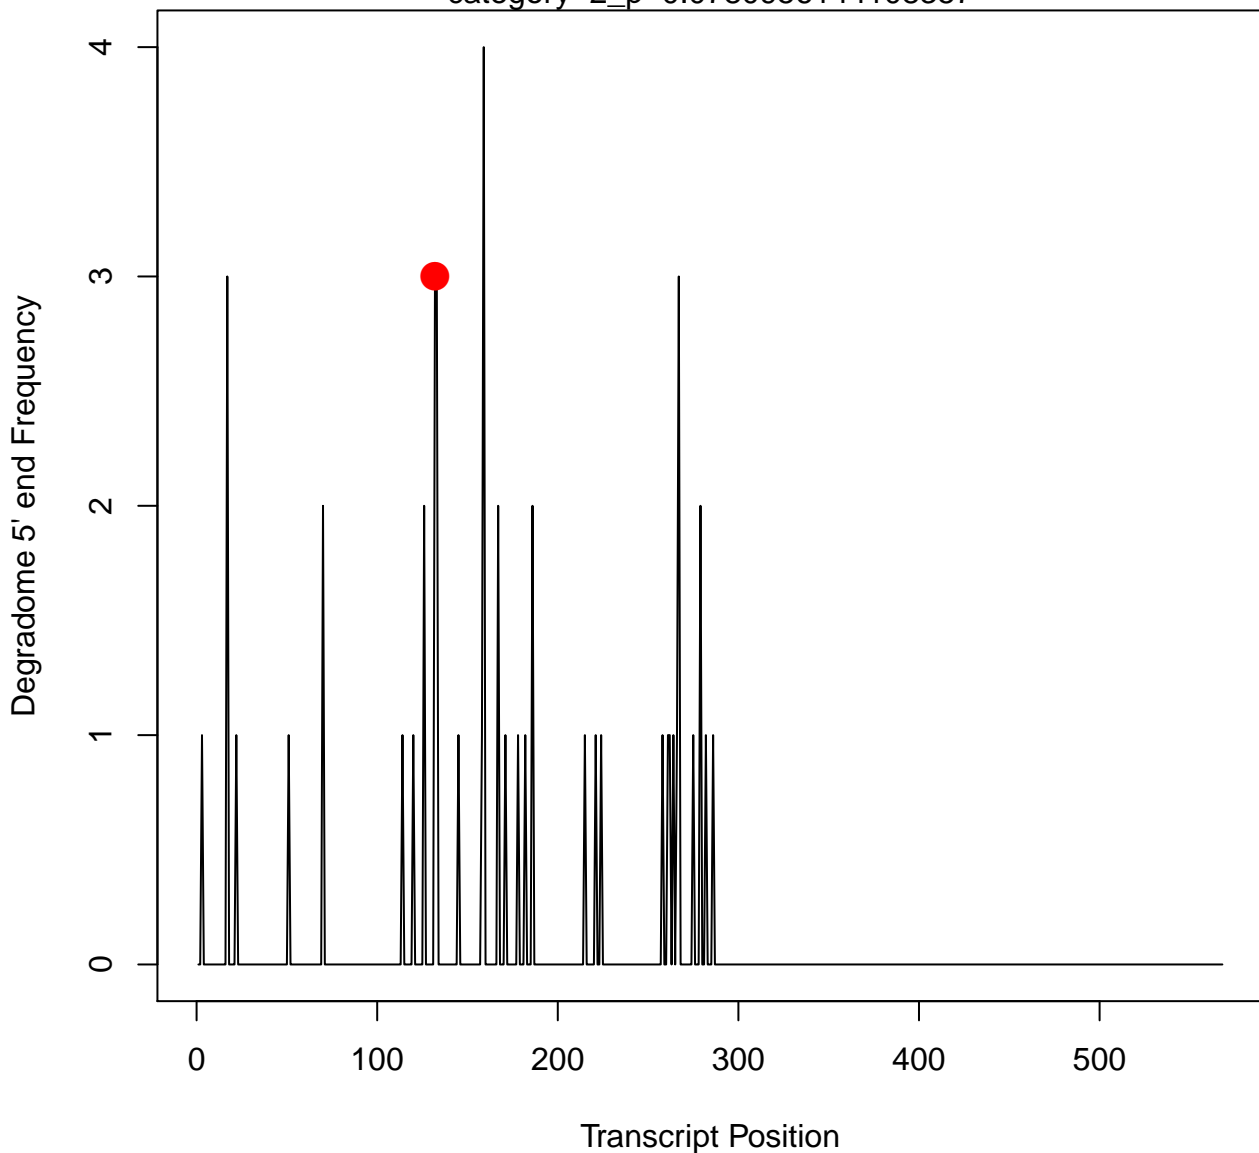

Supplement: s1 [file s1]

**T=Cluster-18410.92522\_Q=novel\_14\_S=151**

category=0\_p=0.0404757821904089

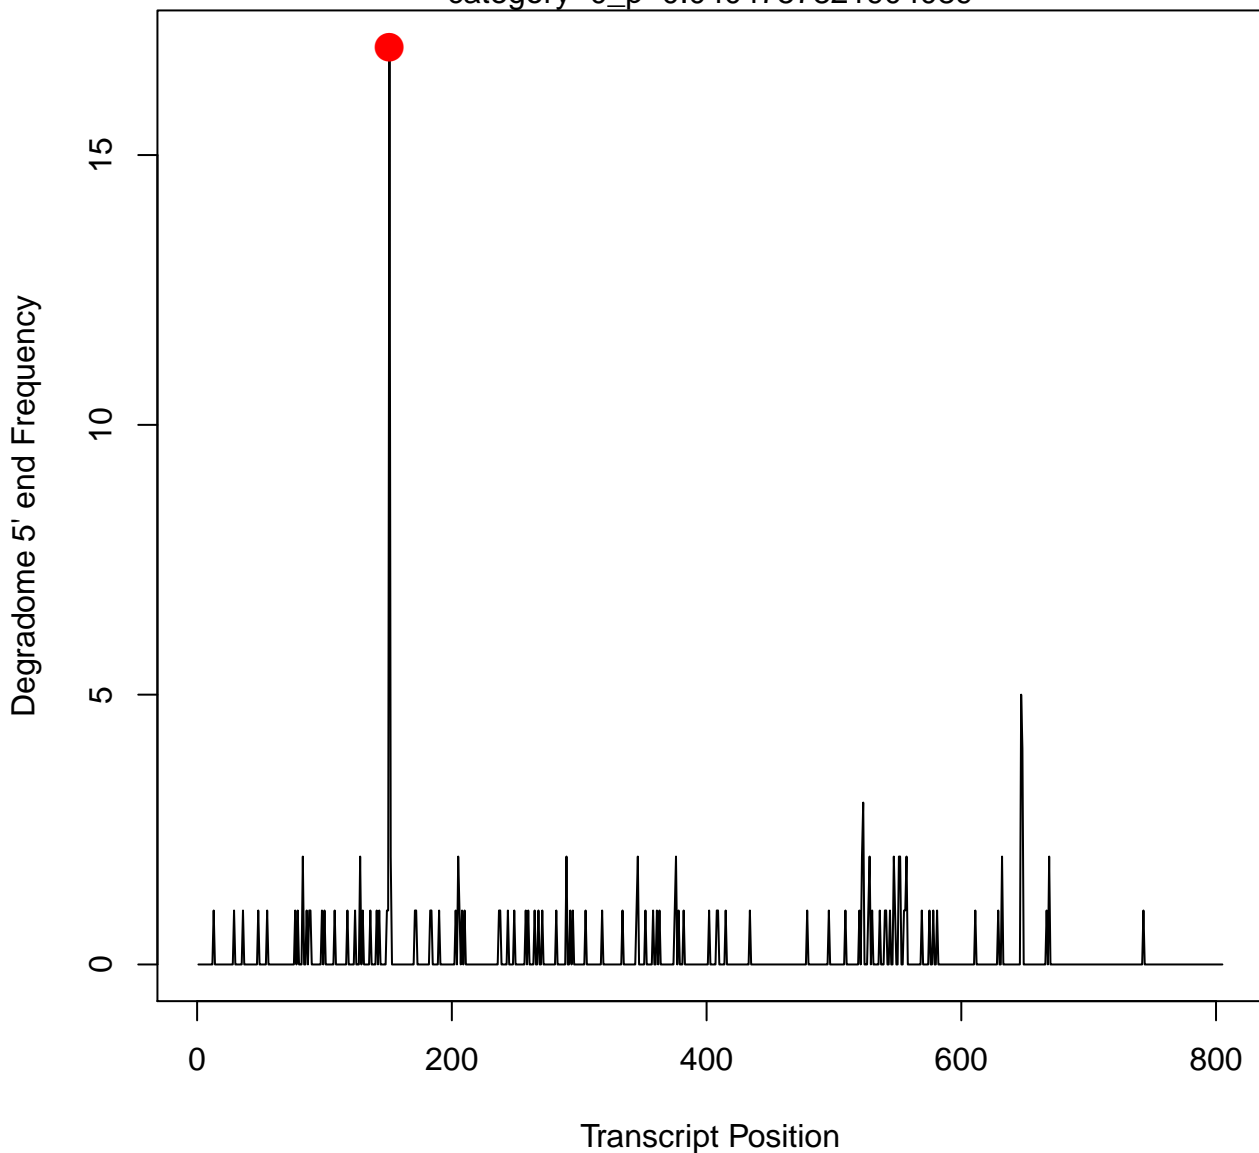

Supplement: s1 [file s1]

**T=Cluster-6128.0\_Q=pma-miR1312\_S=244**

category=0\_p=0.00300537520191857

Degradome 5' end Frequency

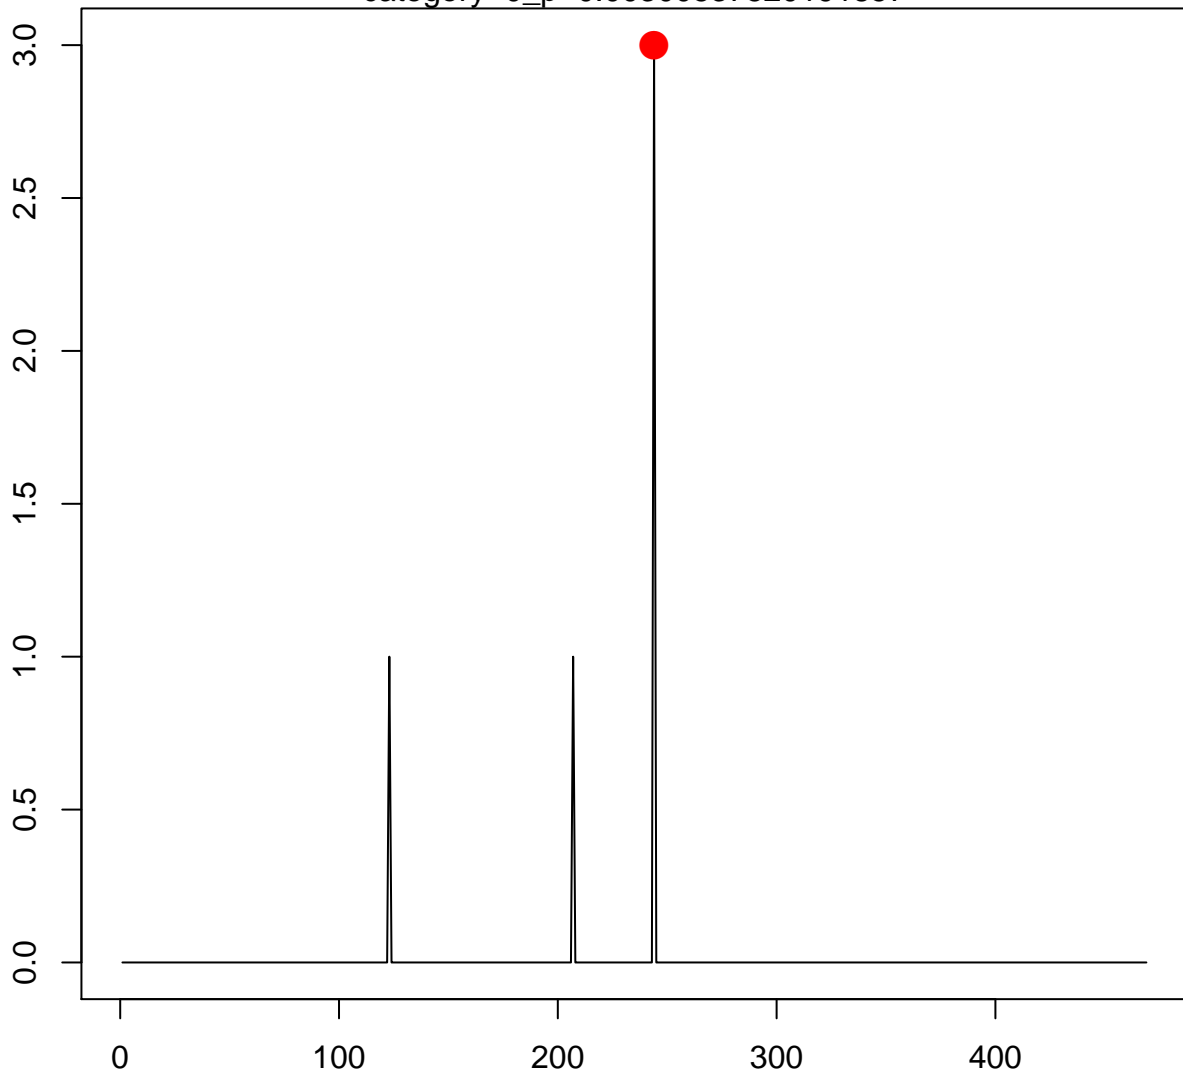

Transcript Position

Supplement: s1 [file s1]

**T=Cluster-16849.1\_Q=pma-miR482a\_S=321**

category=0\_p=0.075779560866452

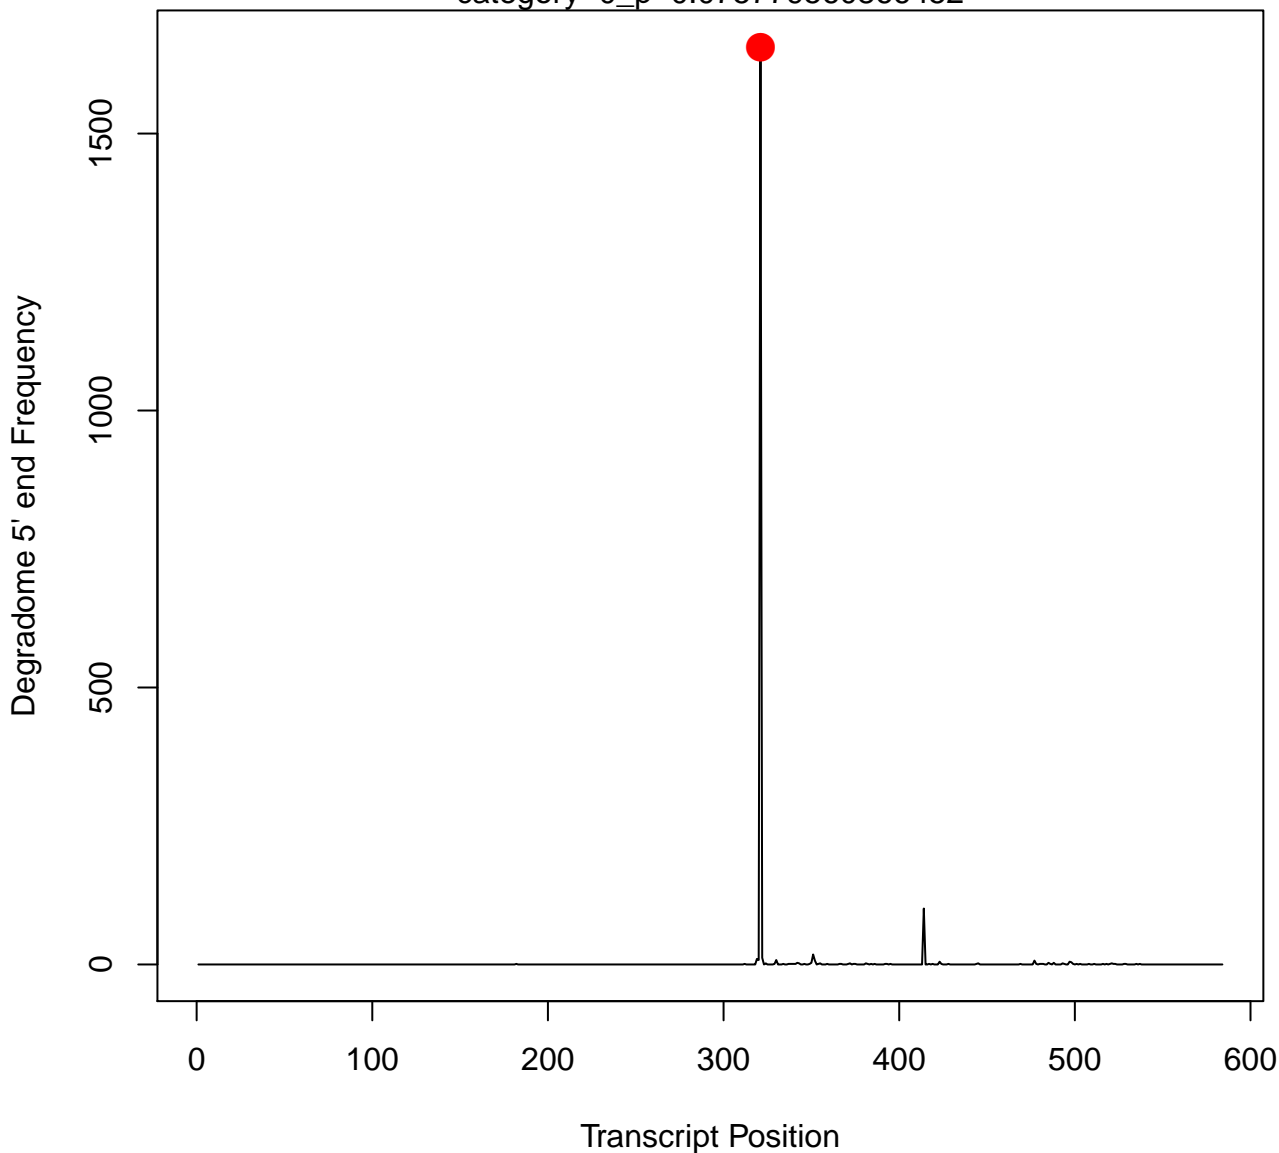

Supplement: s1 [file s1]

**T=Cluster-18410.69140\_Q=novel\_82\_S=520**

category=0\_p=0.0106147270149937

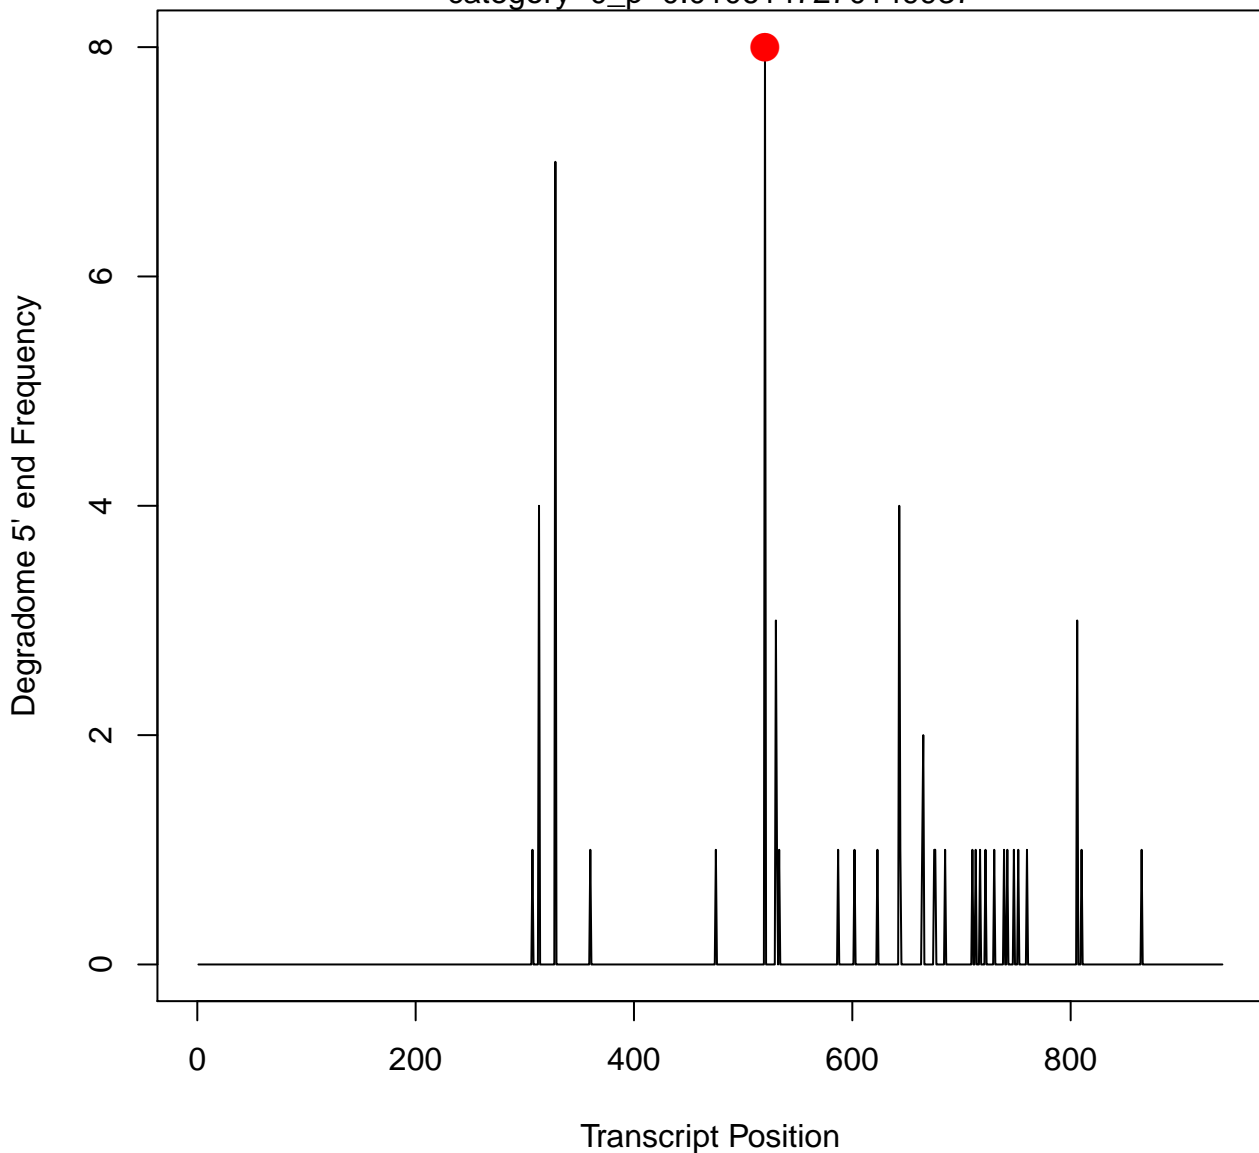

Supplement: s1 [file s1]

**T=Cluster-18410.28836\_Q=novel\_14\_S=233**

category=2\_p=0.0115490438418195

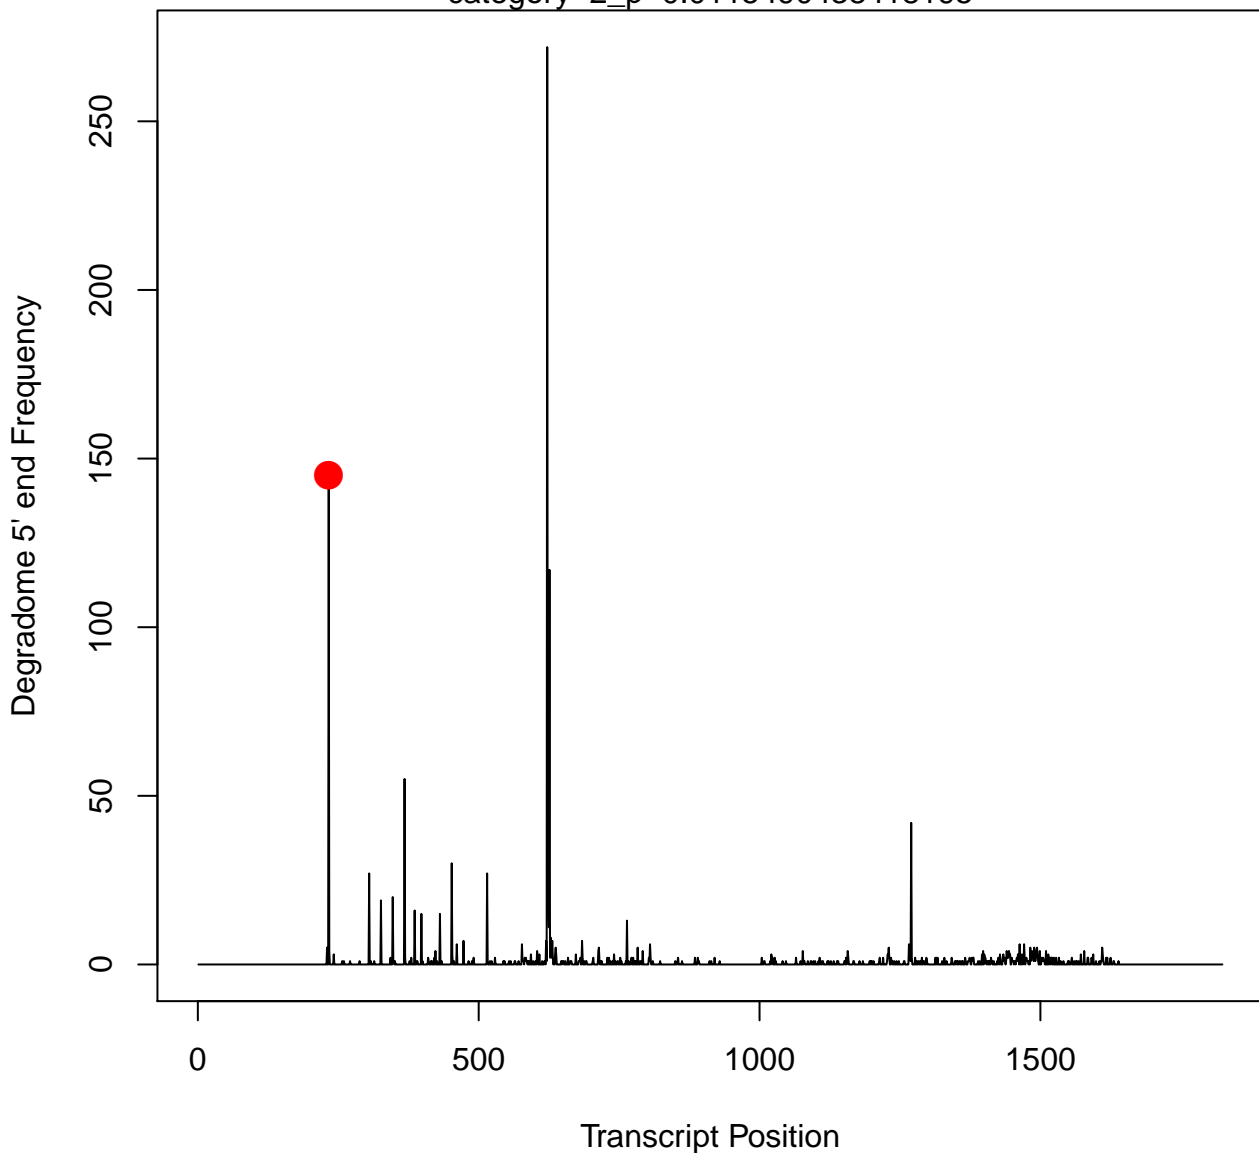

Supplement: s1 [file s1]

**T=Cluster-18410.41354\_Q=novel\_6\_S=148**

category=0\_p=0.0116970259373812

Degradome 5' end Frequency

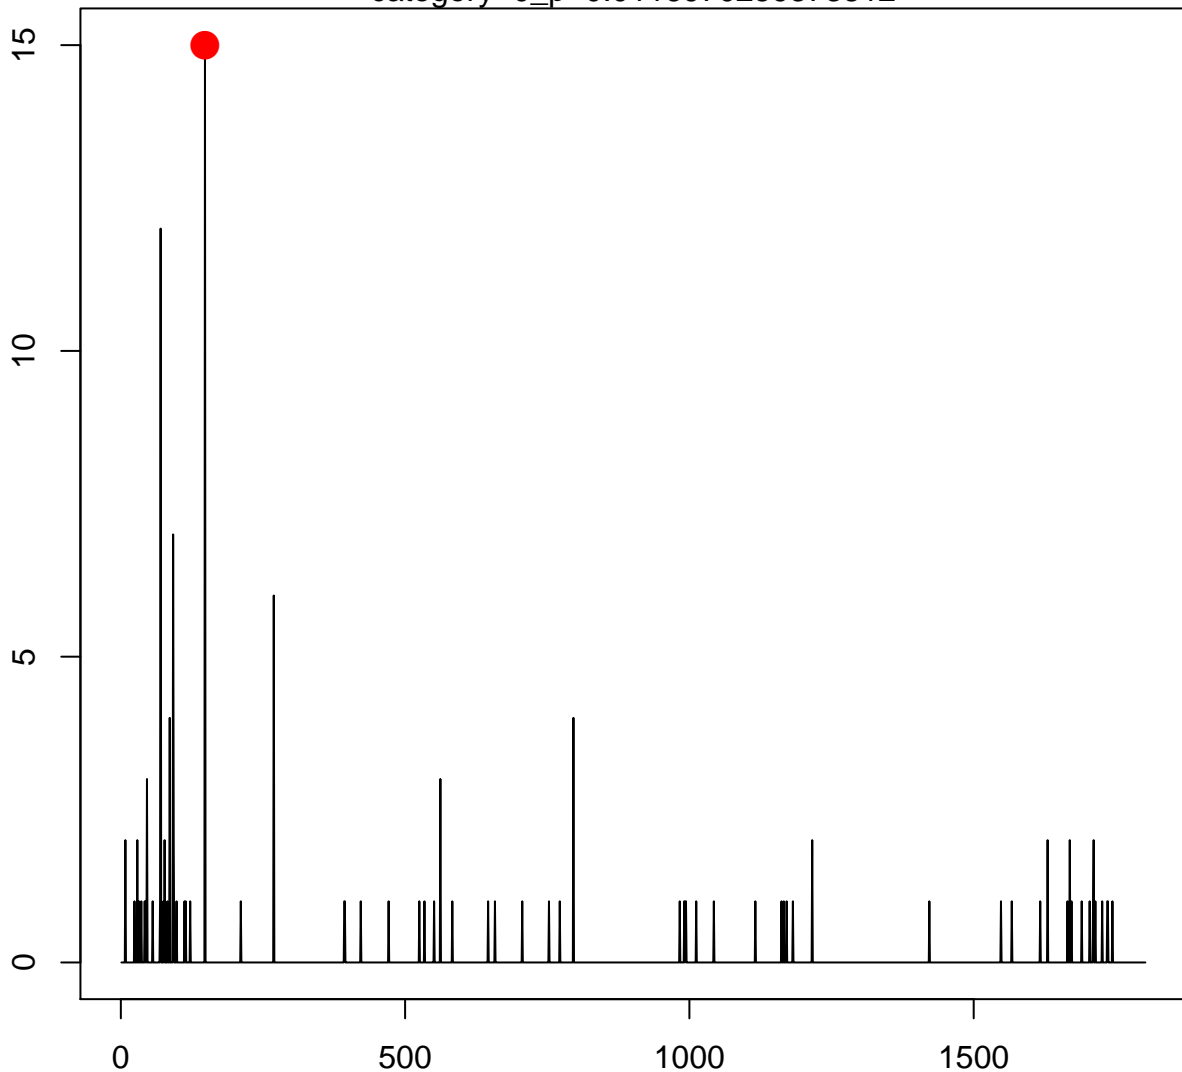

Transcript Position

Supplement: s1 [file s1]

**T=Cluster-18410.54394\_Q=novel\_120\_S=5810**

category=3\_p=0.0831820937889345

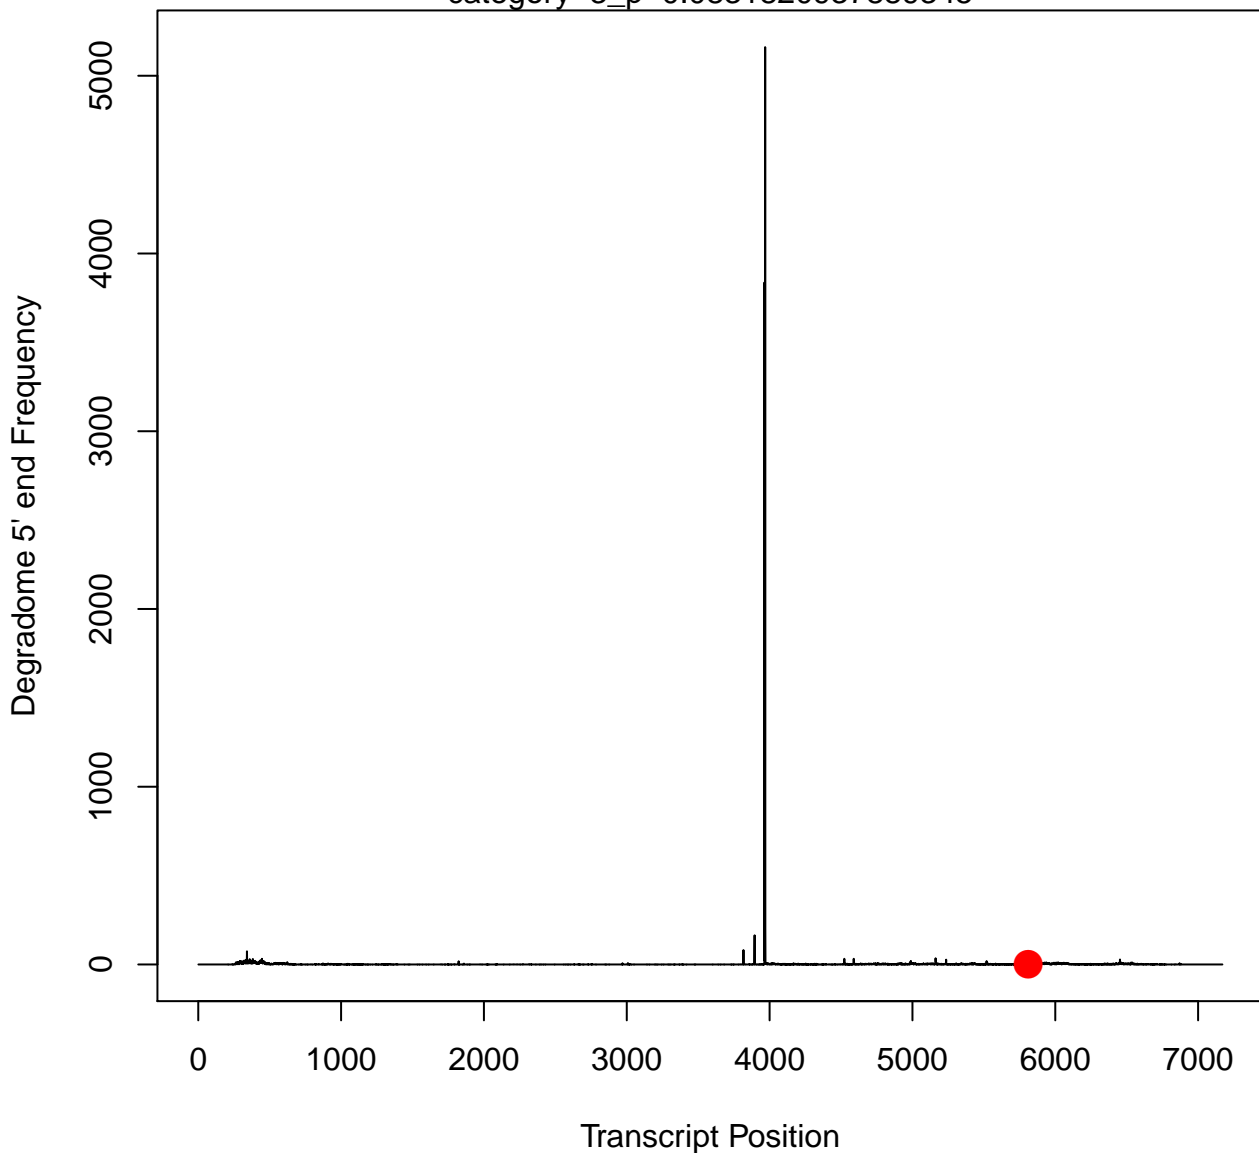

Supplement: s1 [file s1]

**T=Cluster-18410.75025\_Q=novel\_20\_S=1855**

category=0\_p=0.00953124285792795

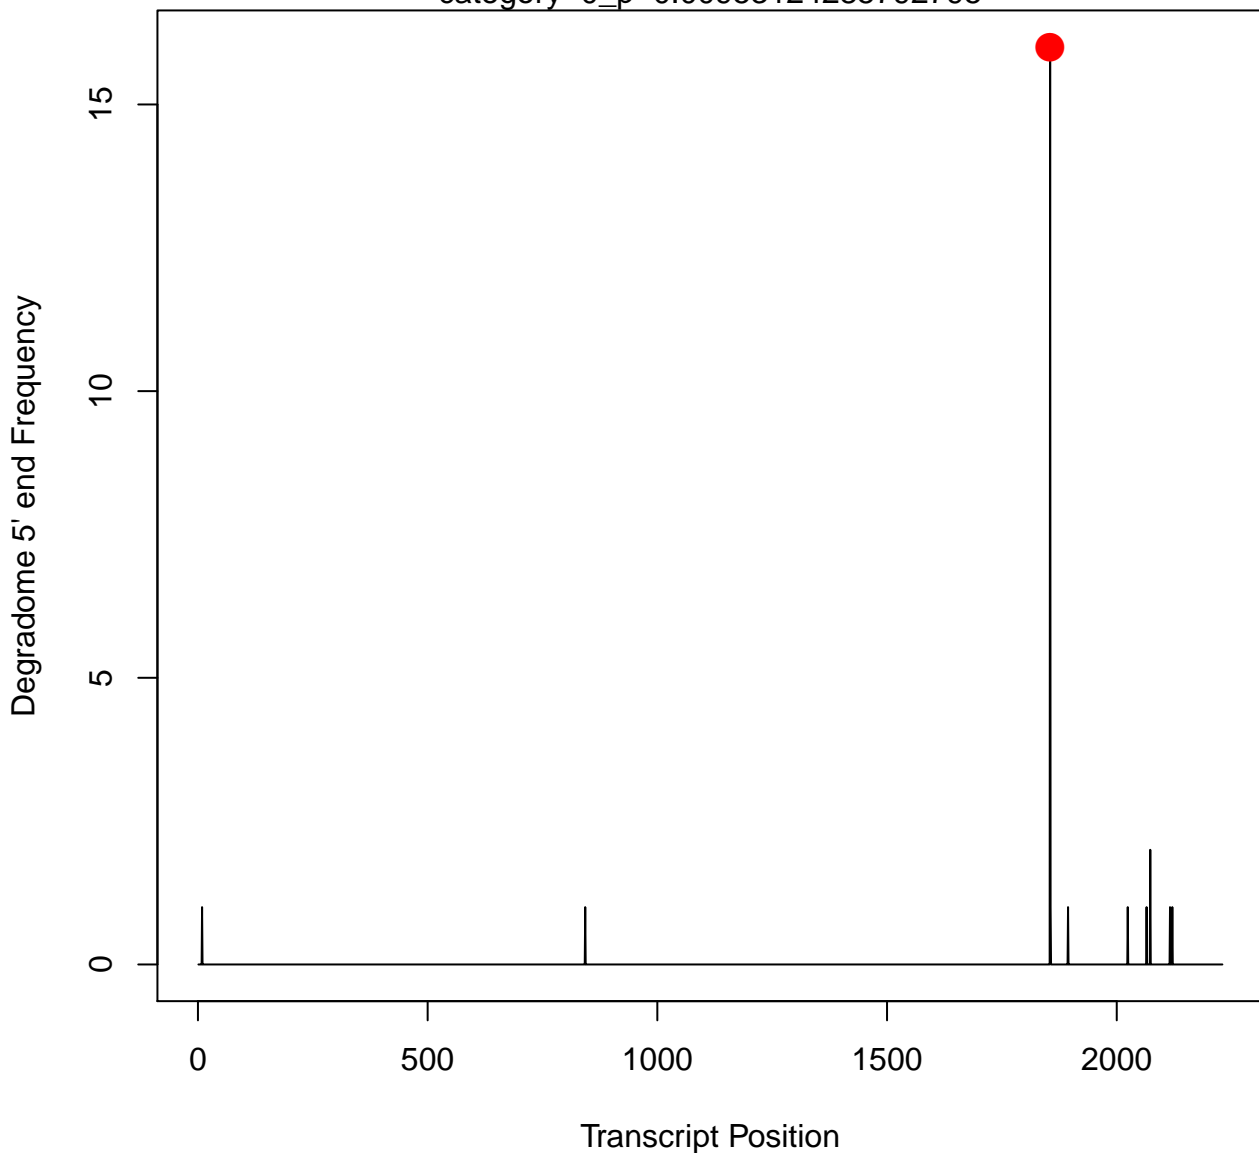

Supplement: s1 [file s1]

**T=Cluster-18410.69759\_Q=novel\_42\_S=1392**

category=0\_p=0.00136720107825572

Degradome 5' end Frequency

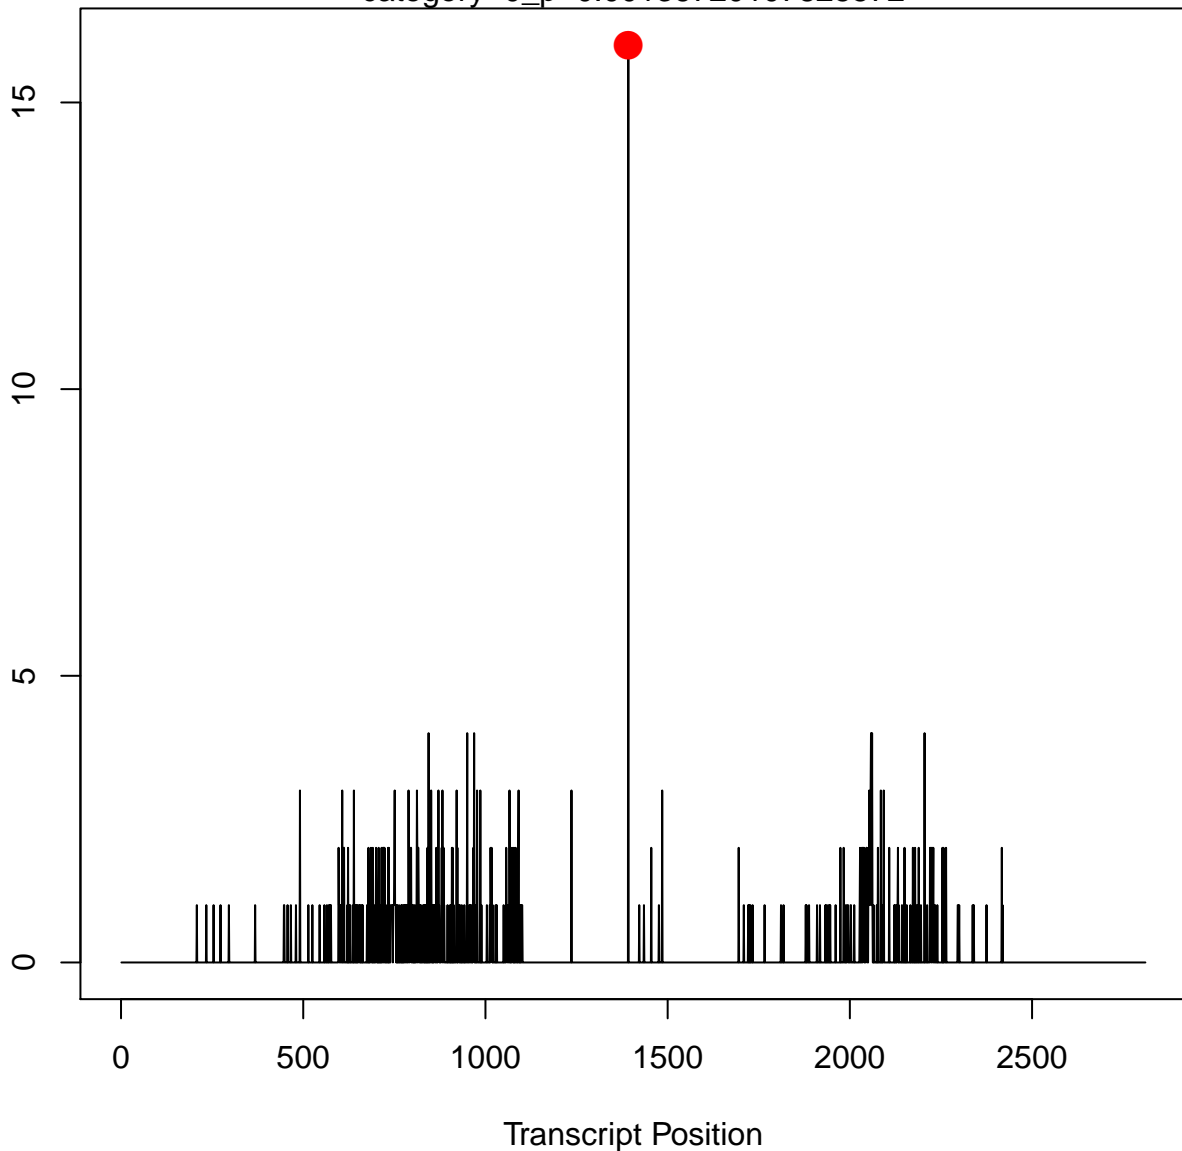

Supplement: s1 [file s1]

**T=Cluster-18410.75028\_Q=novel\_20\_S=1870**

category=0\_p=0.00681733854218258

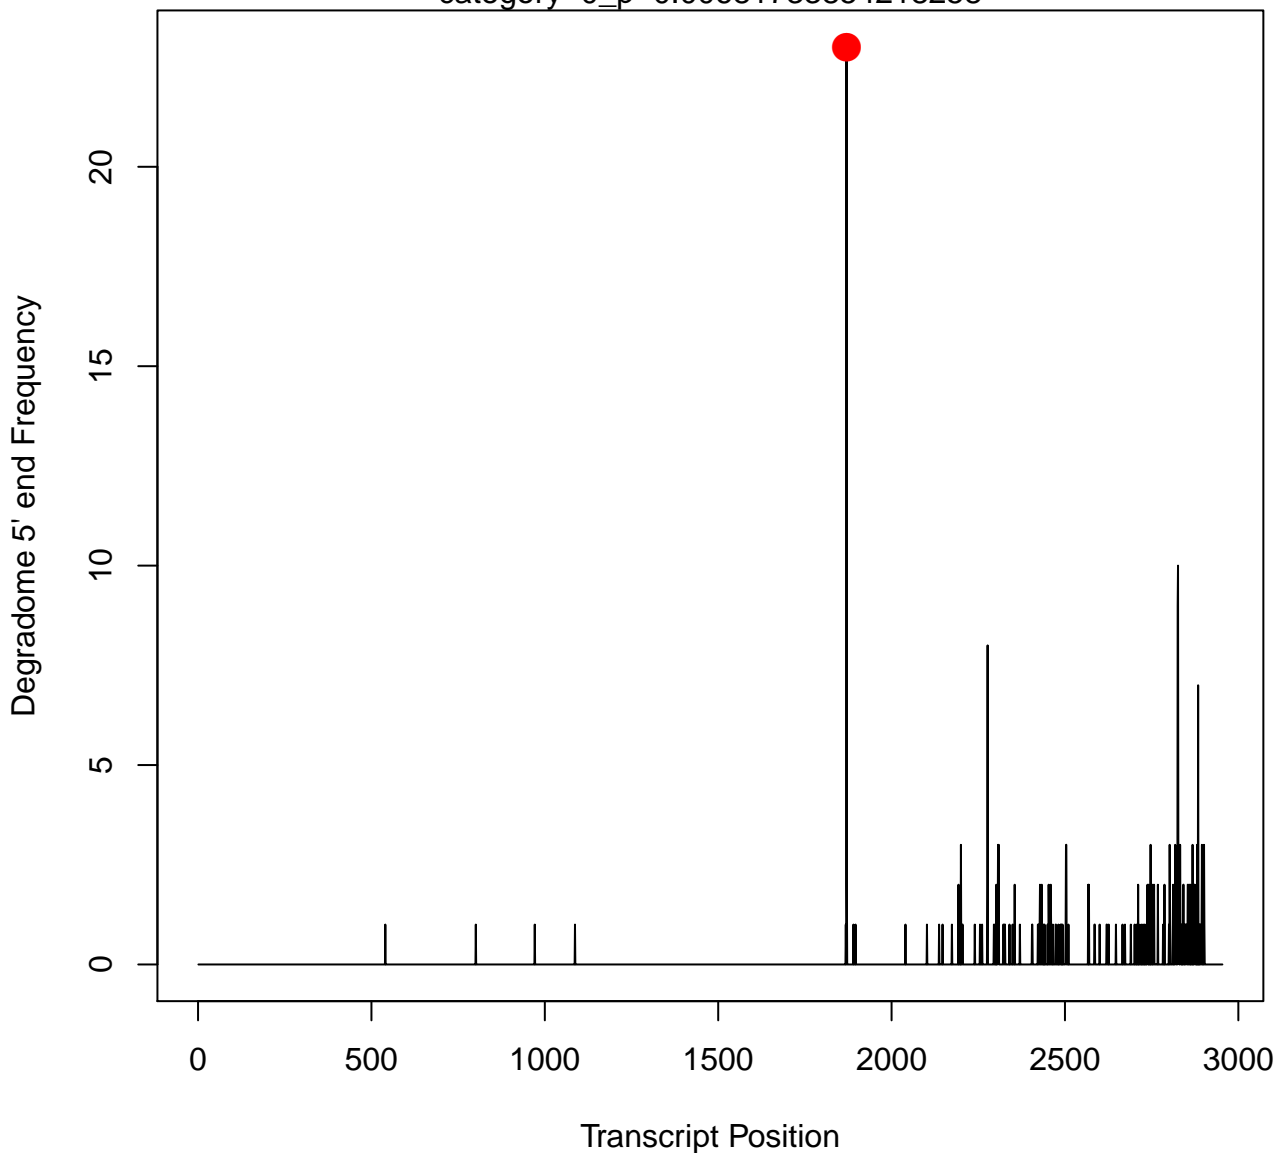

Supplement: s1 [file s1]

**T=Cluster-18410.1082\_Q=novel\_11\_S=738**

category=0\_p=0.0073607136464986

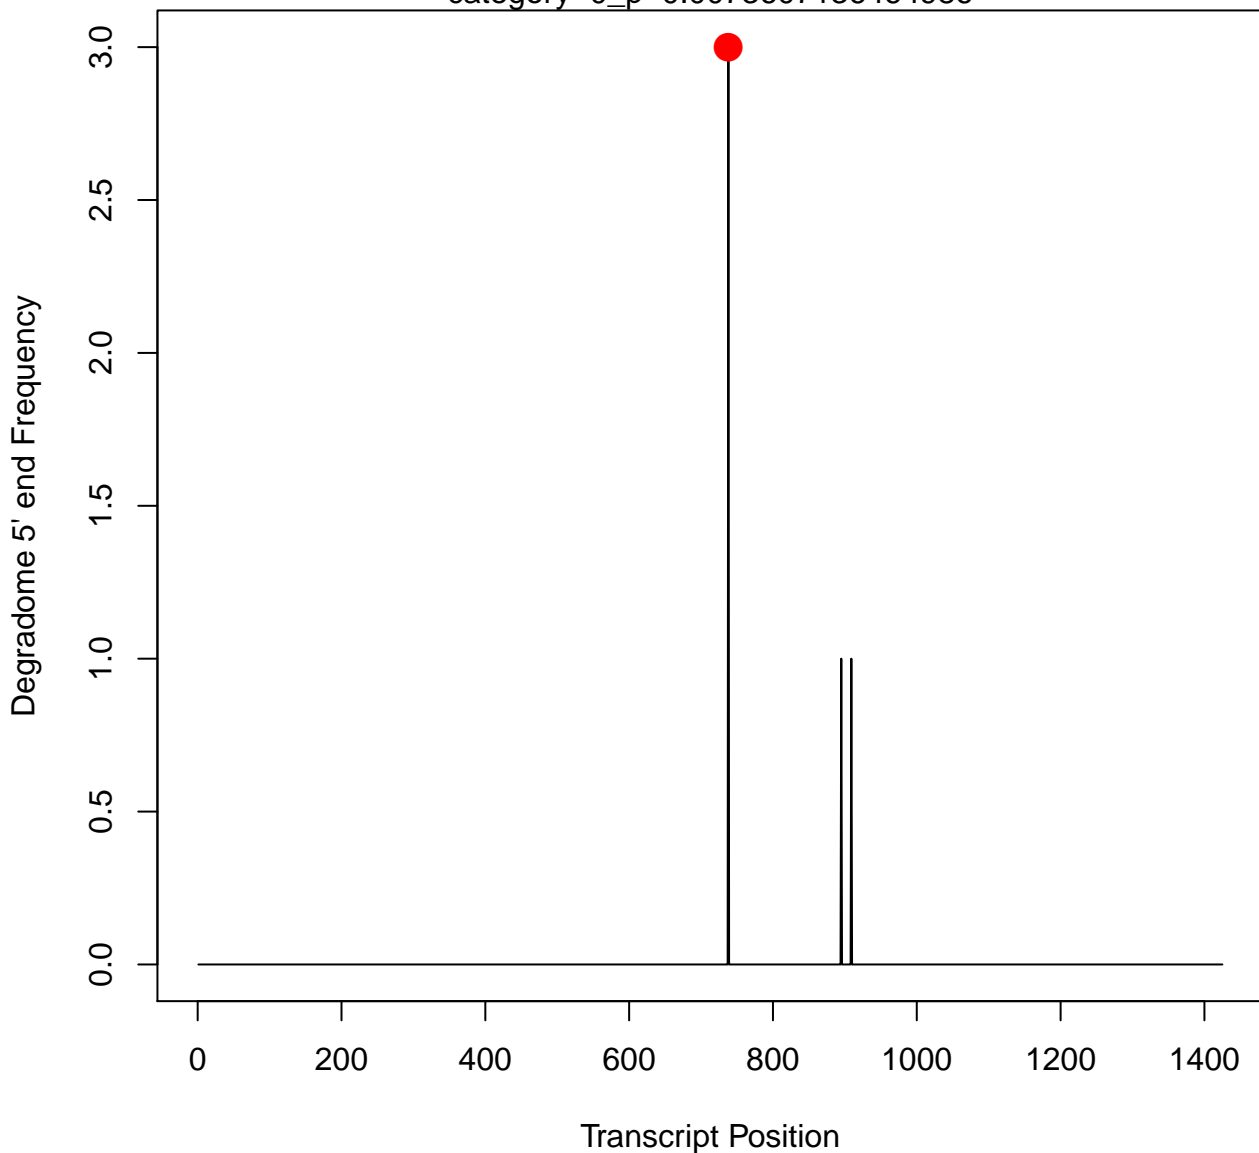

Supplement: s1 [file s1]

**T=Cluster-18410.78195\_Q=novel\_82\_S=258**

category=0\_p=0.00572969583297245

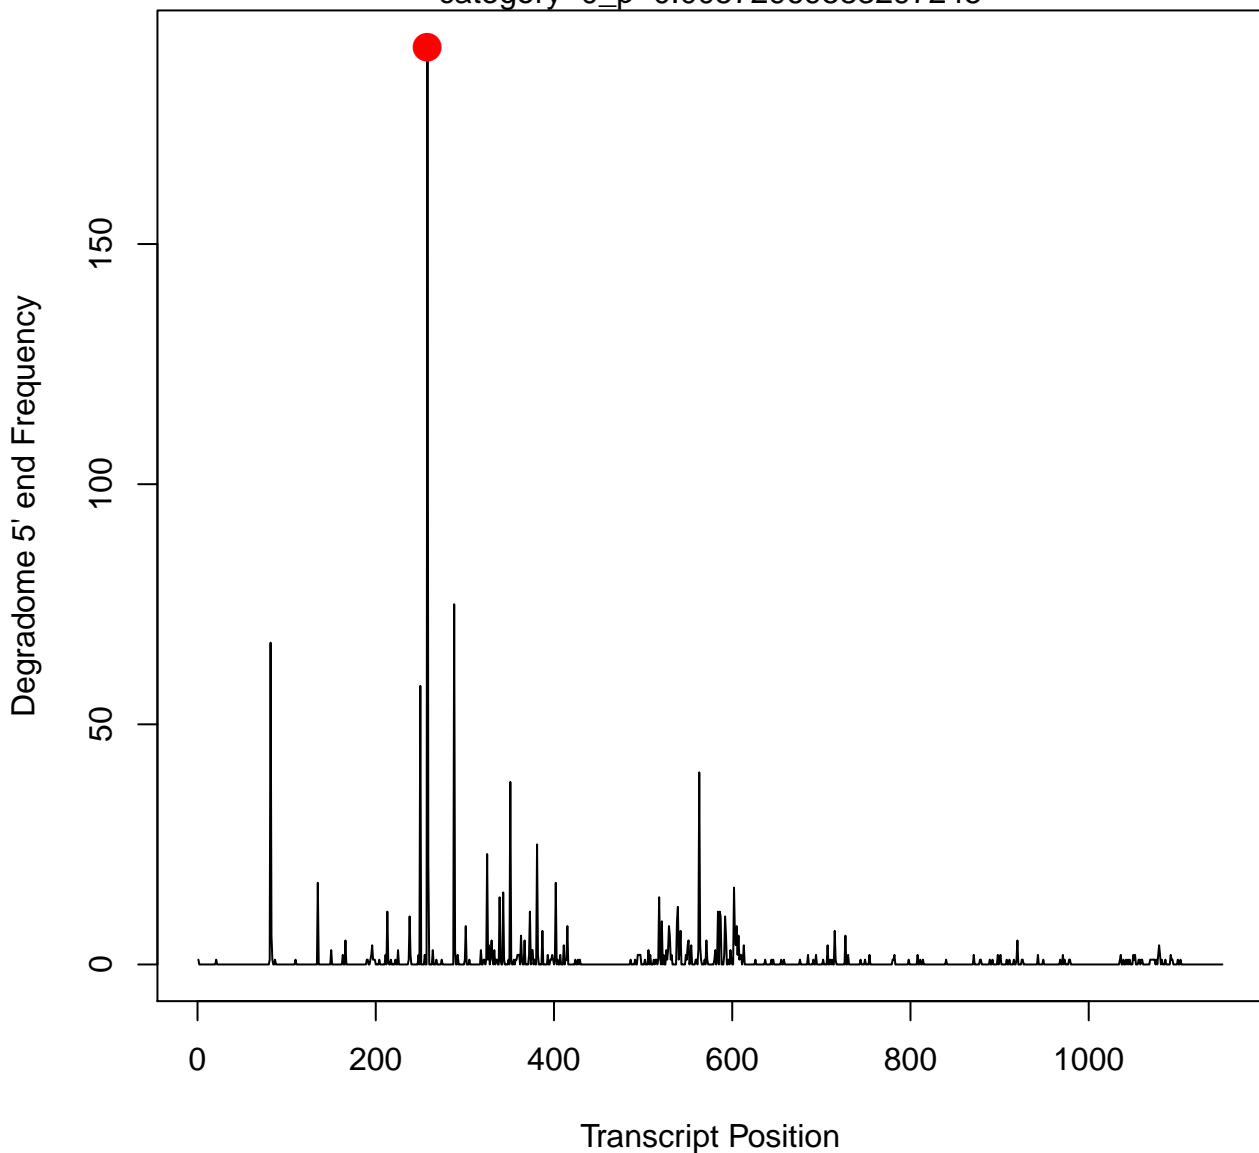

Supplement: s1 [file s1]

**T=Cluster-18410.75904\_Q=novel\_20\_S=1613**

category=0\_p=0.00572969583297245

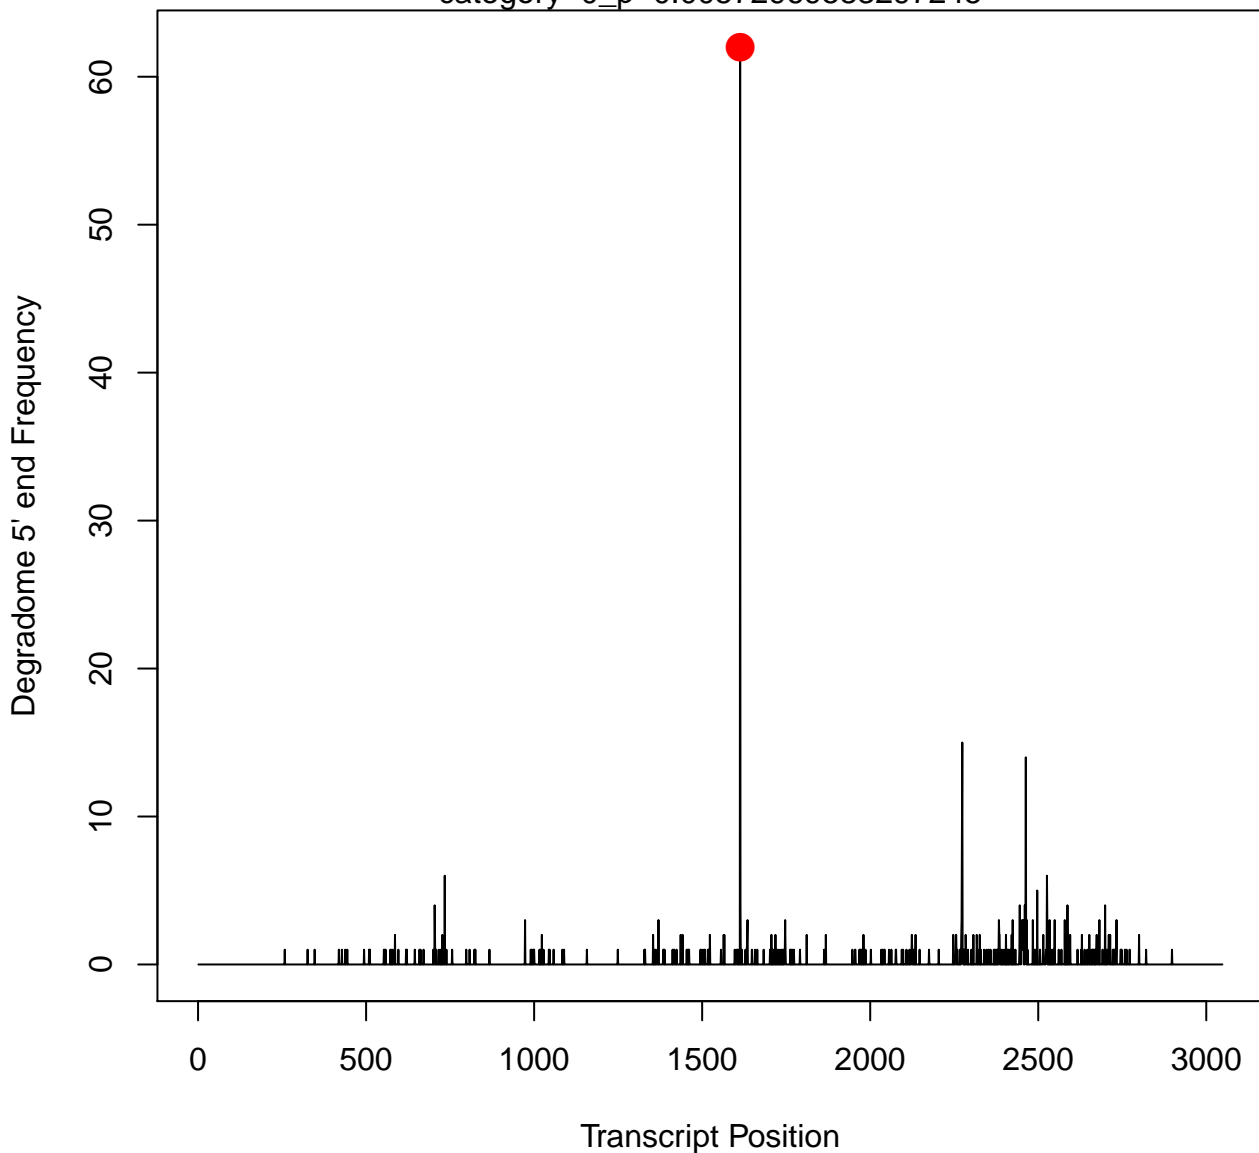

Supplement: s1 [file s1]

**T=Cluster-18410.8088\_Q=pma-miR947\_S=57**

category=0\_p=0.00109391048354923

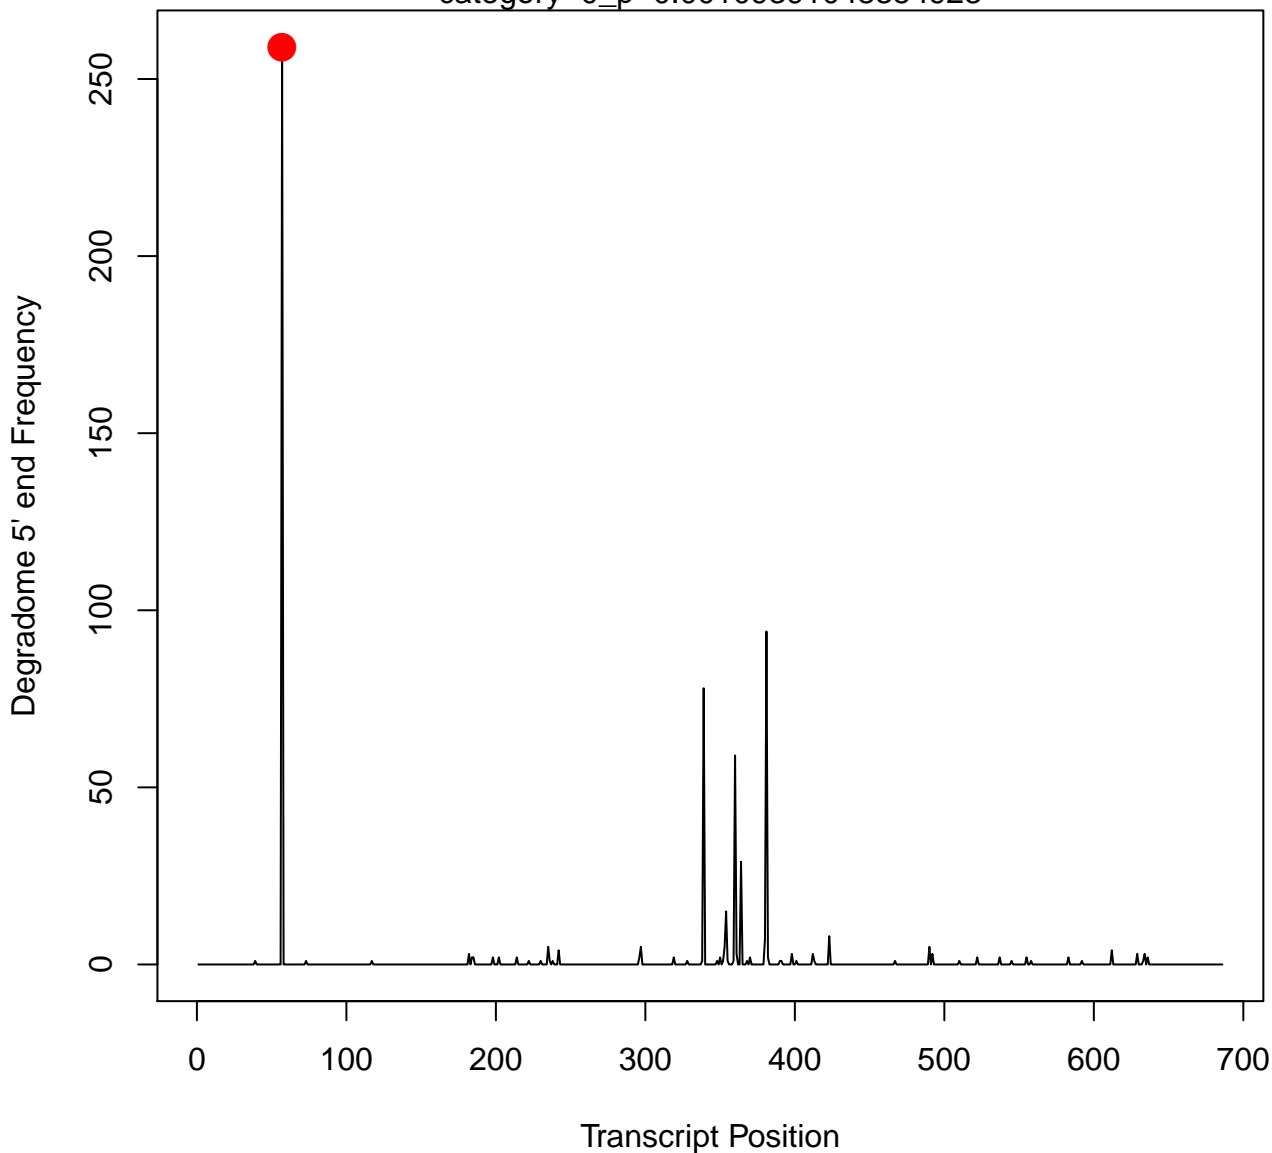

Supplement: s1 [file s1]

**T=Cluster-18410.1905\_Q=pma-miR482a\_S=185**

category=0\_p=0.00844657216822353

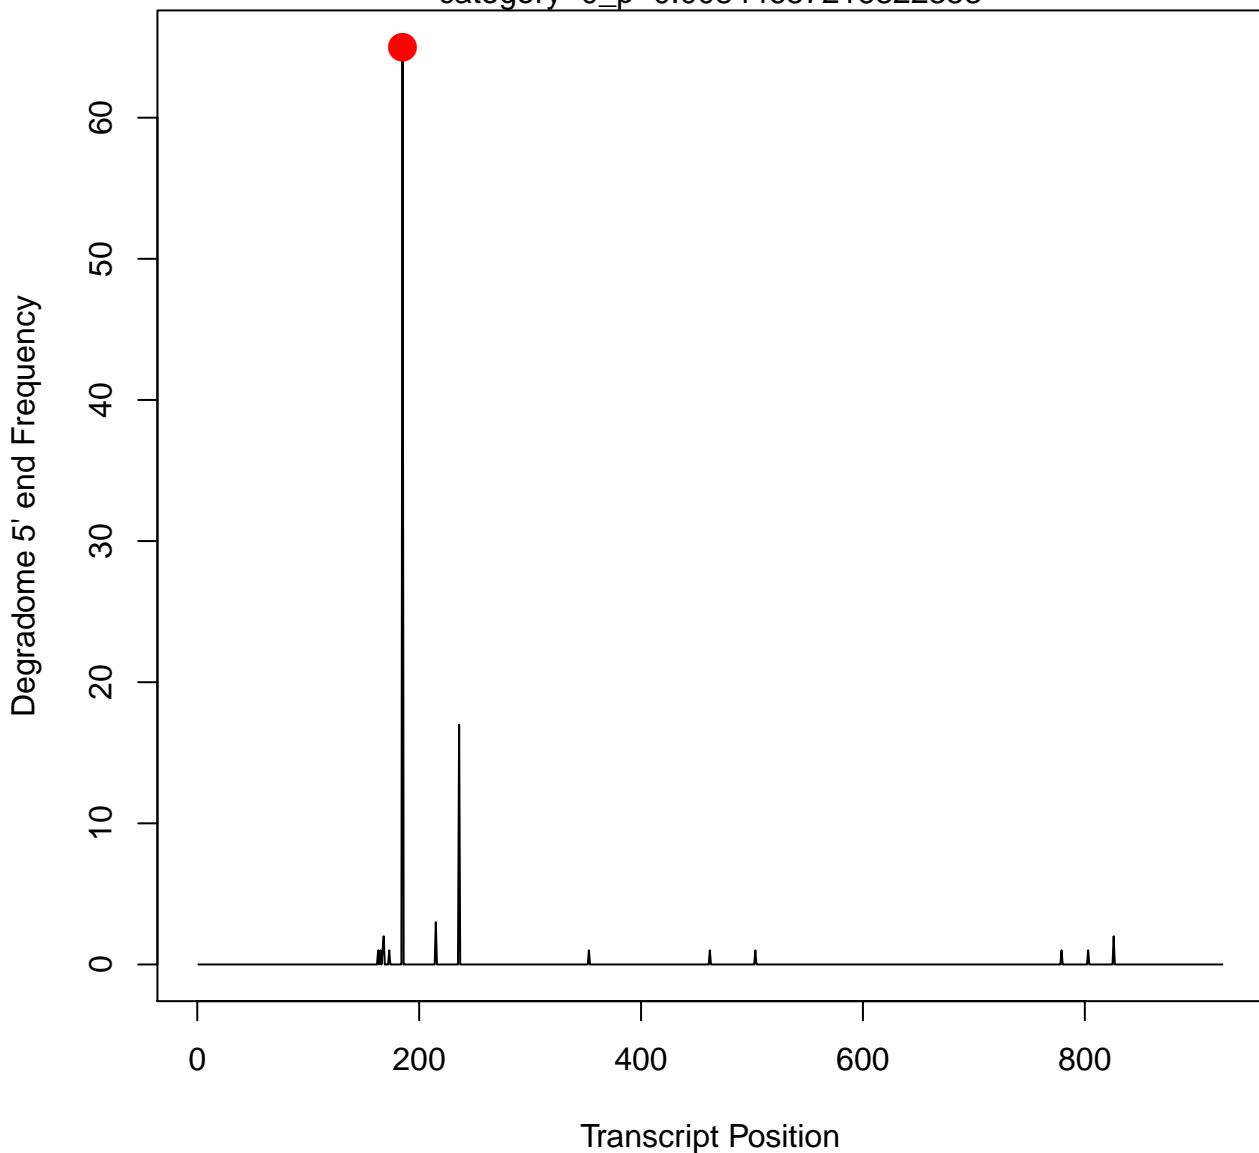

Supplement: s1 [file s1]

**T=Cluster-18410.32232\_Q=novel\_12\_S=82**

category=0\_p=0.00218662432695249

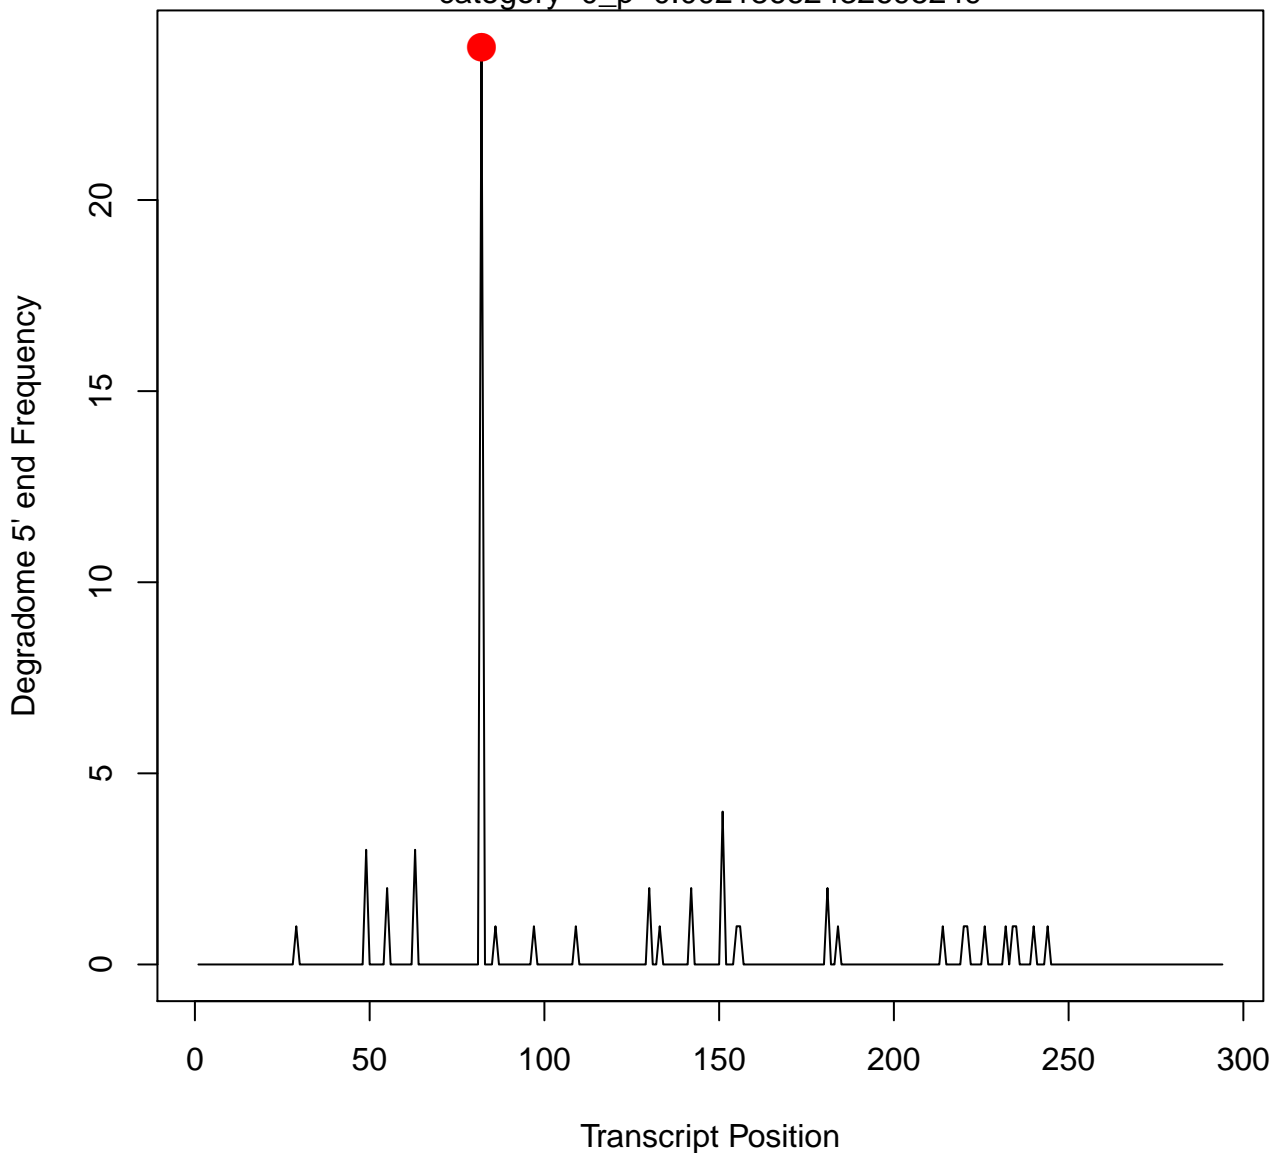

Supplement: s1 [file s1]

**T=Cluster-18410.117127\_Q=novel\_82\_S=499**

category=0\_p=0.0970273253550238

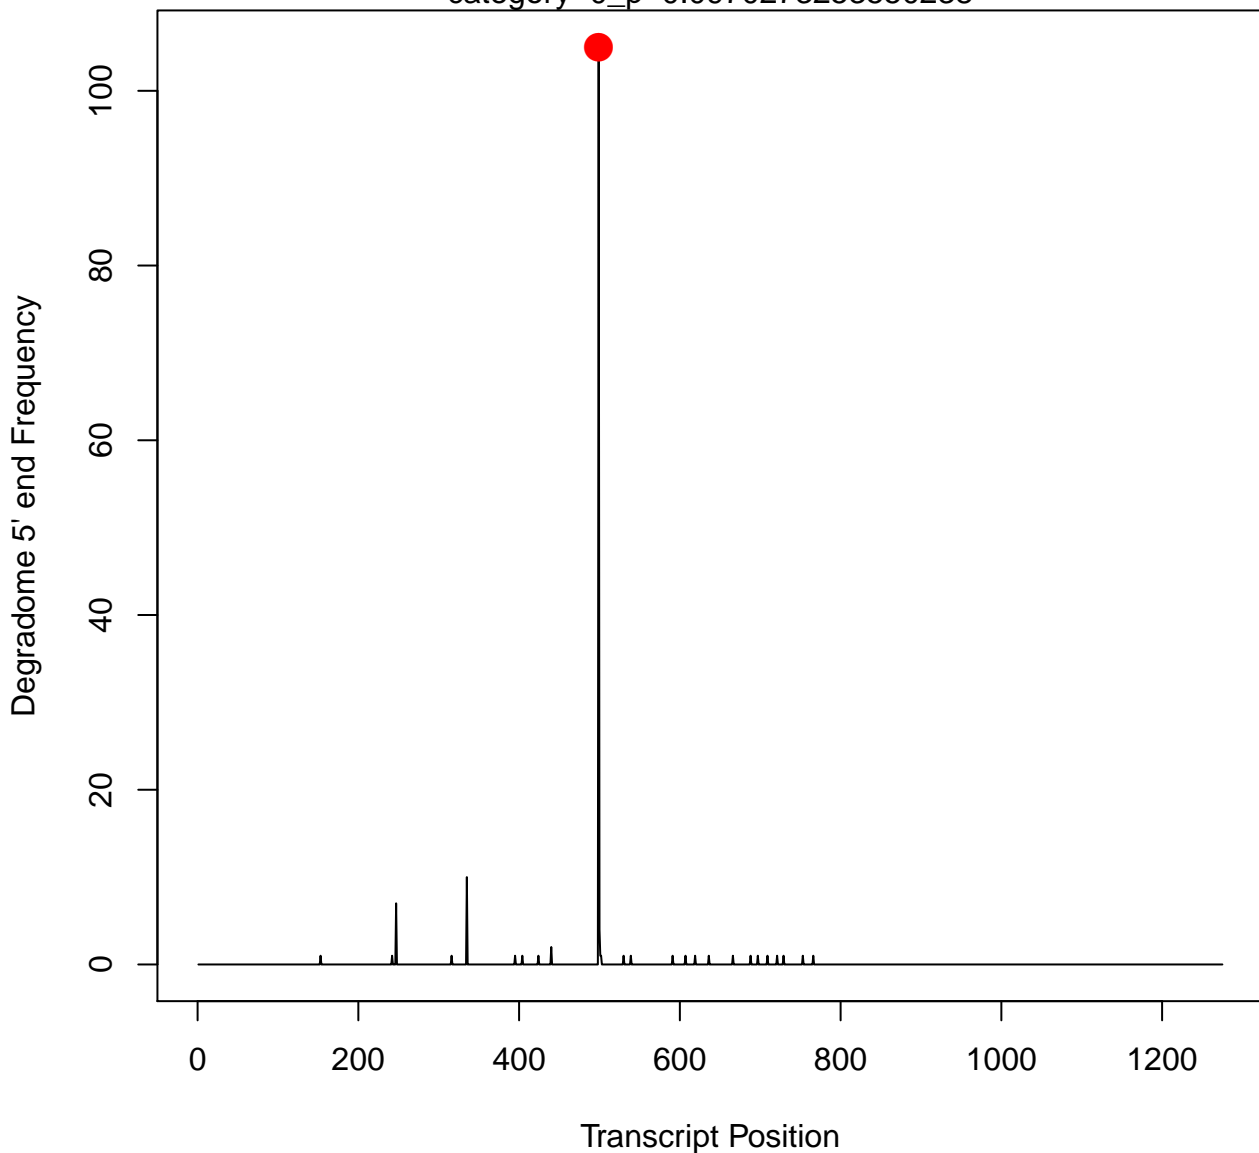

Supplement: s1 [file s1]

**T=Cluster-18410.67258\_Q=novel\_174\_S=27**

category=0\_p=0.0617653142557406

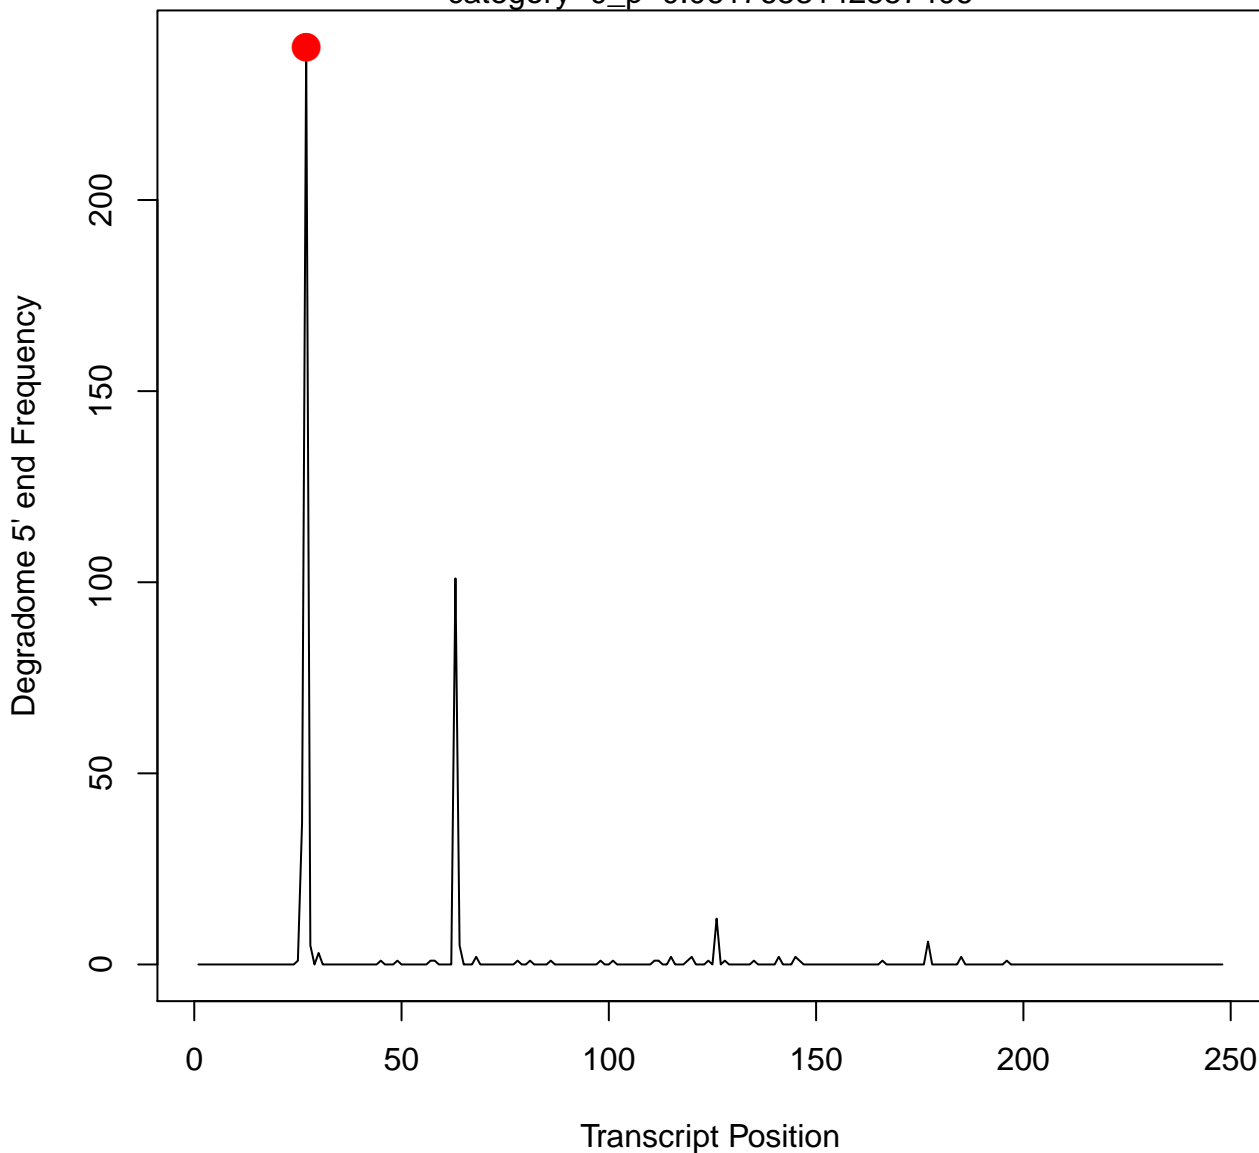

Supplement: s1 [file s1]

**T=Cluster-18410.110699\_Q=novel\_3\_S=367**

category=0\_p=0.0930654112354108

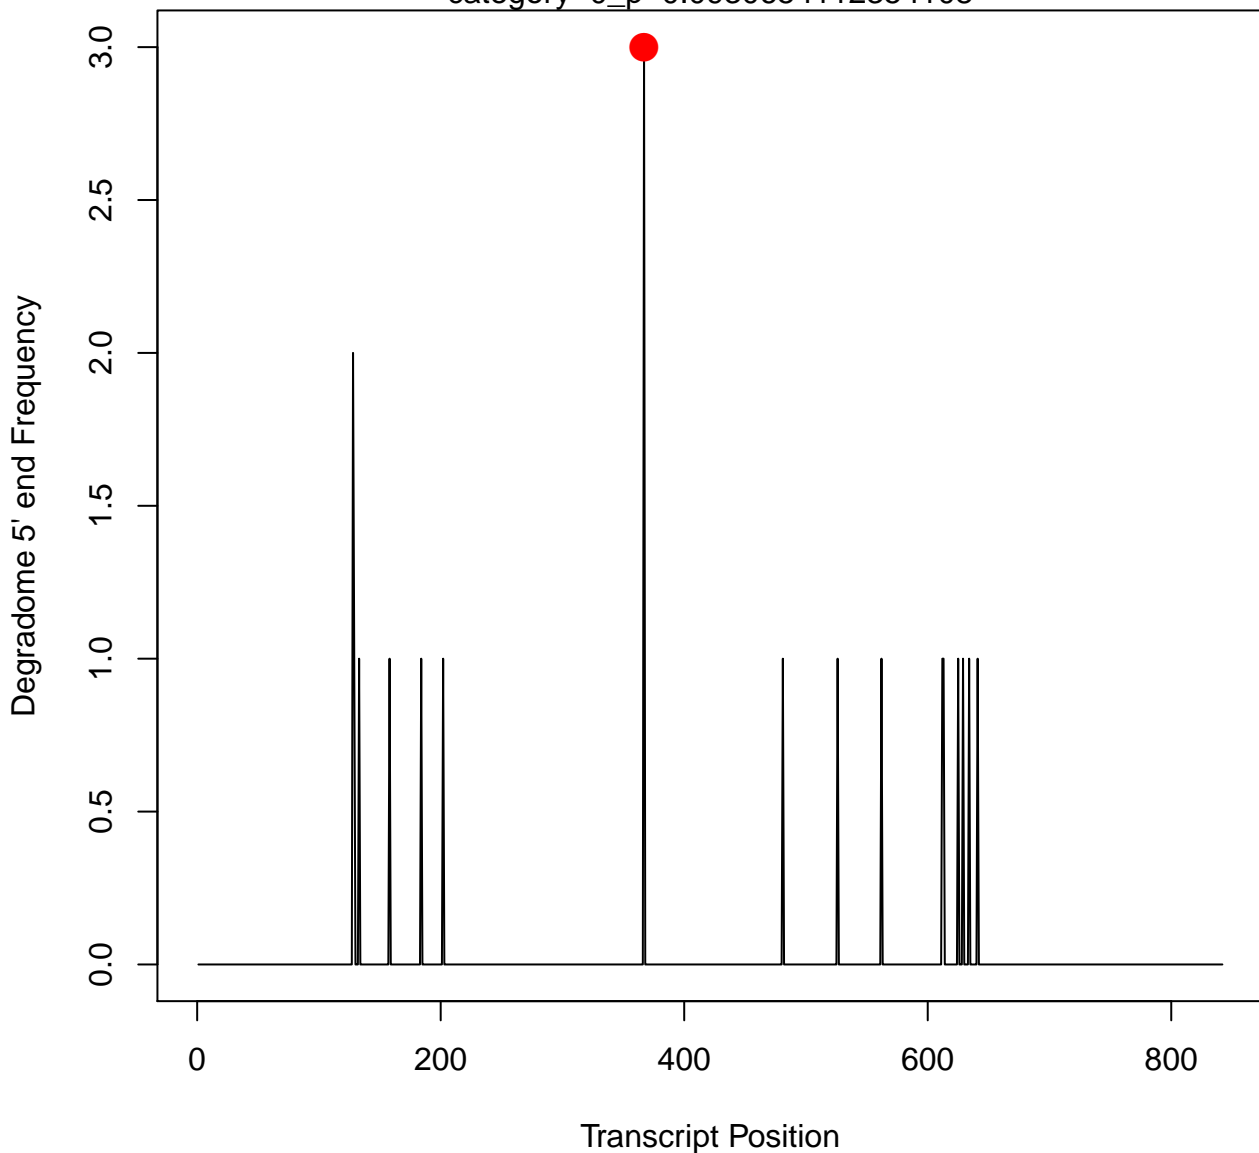

Supplement: s1 [file s1]

**T=Cluster-18410.70688\_Q=novel\_20\_S=1876**

category=0\_p=0.0106147270149937

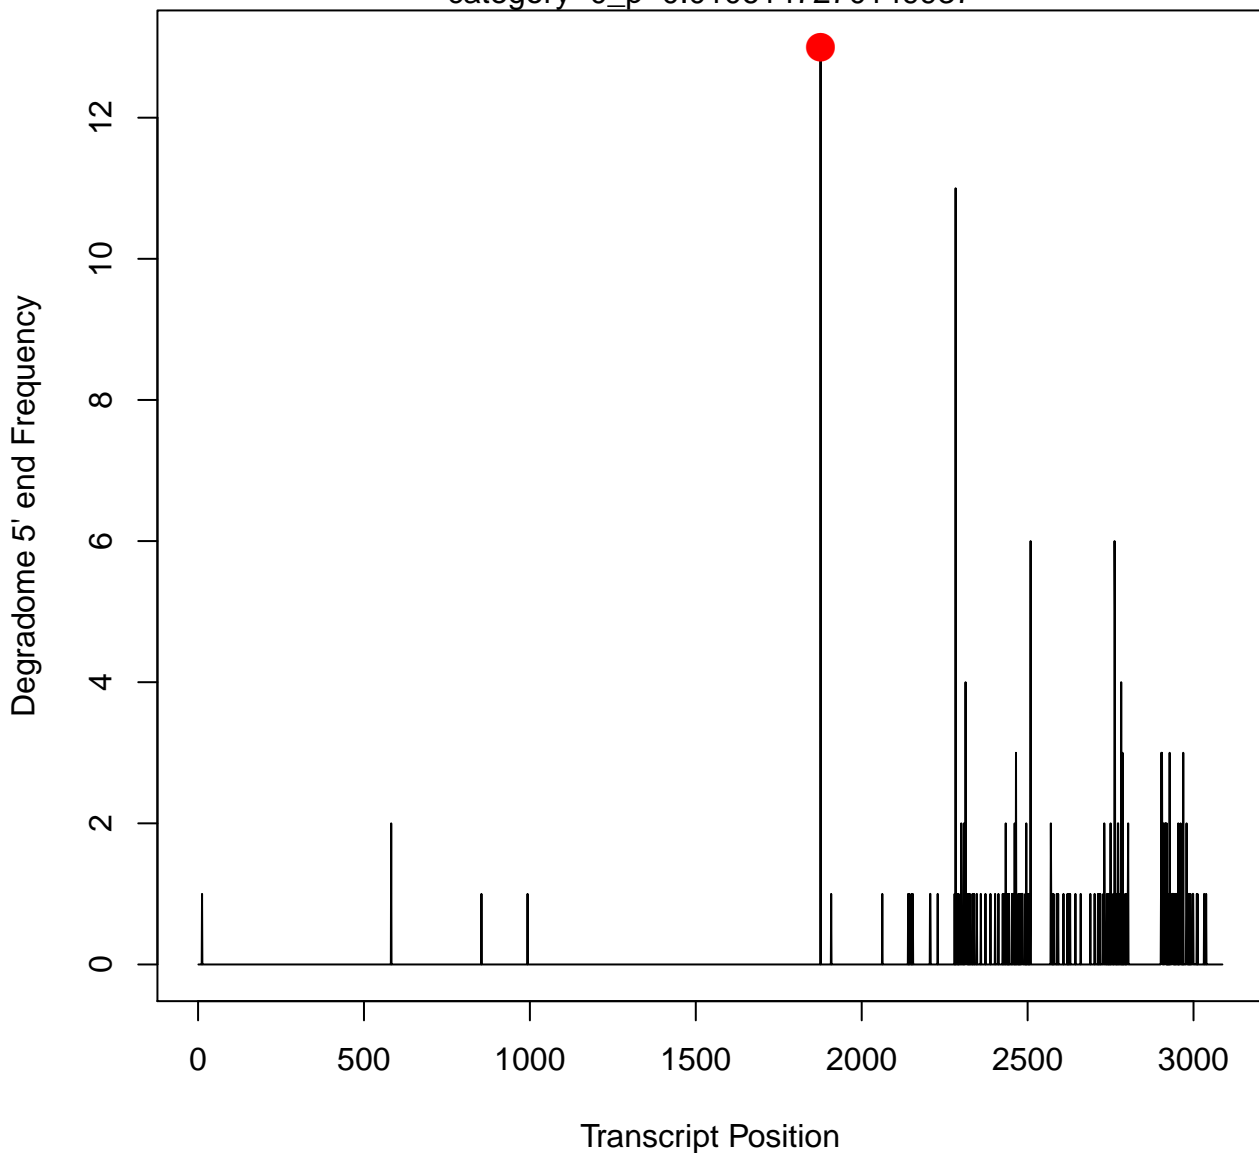

Supplement: s1 [file s1]

**T=Cluster-18410.55197\_Q=novel\_174\_S=456**

category=0\_p=0.00109391048354923

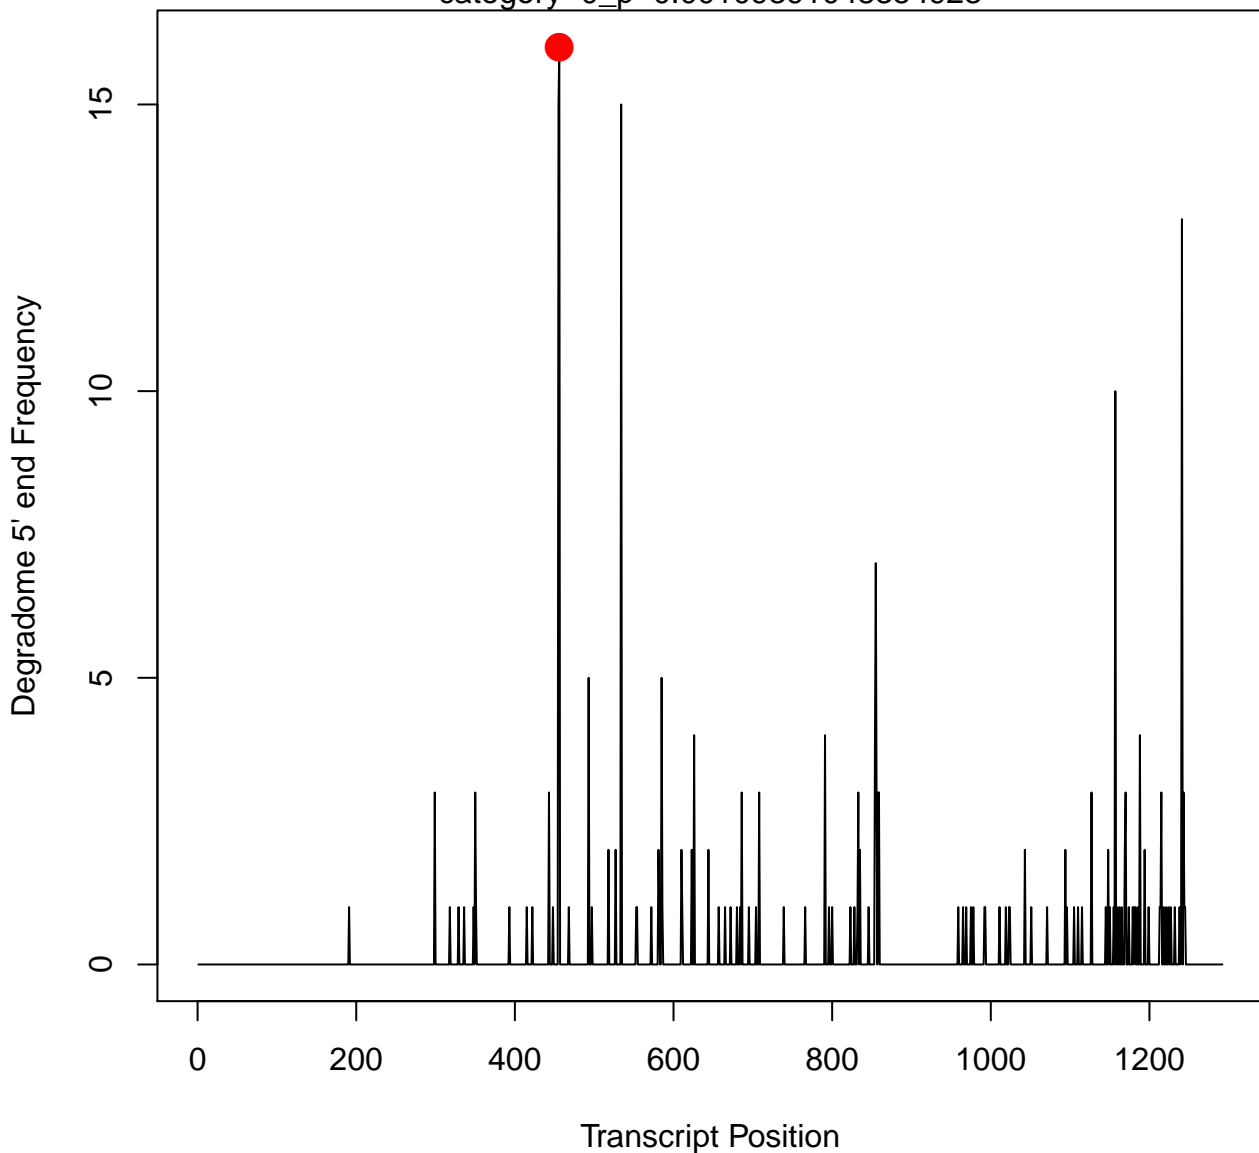

Supplement: s1 [file s1]

**T=Cluster-18410.11740\_Q=novel\_12\_S=2042**

category=3\_p=0.0372825351917704

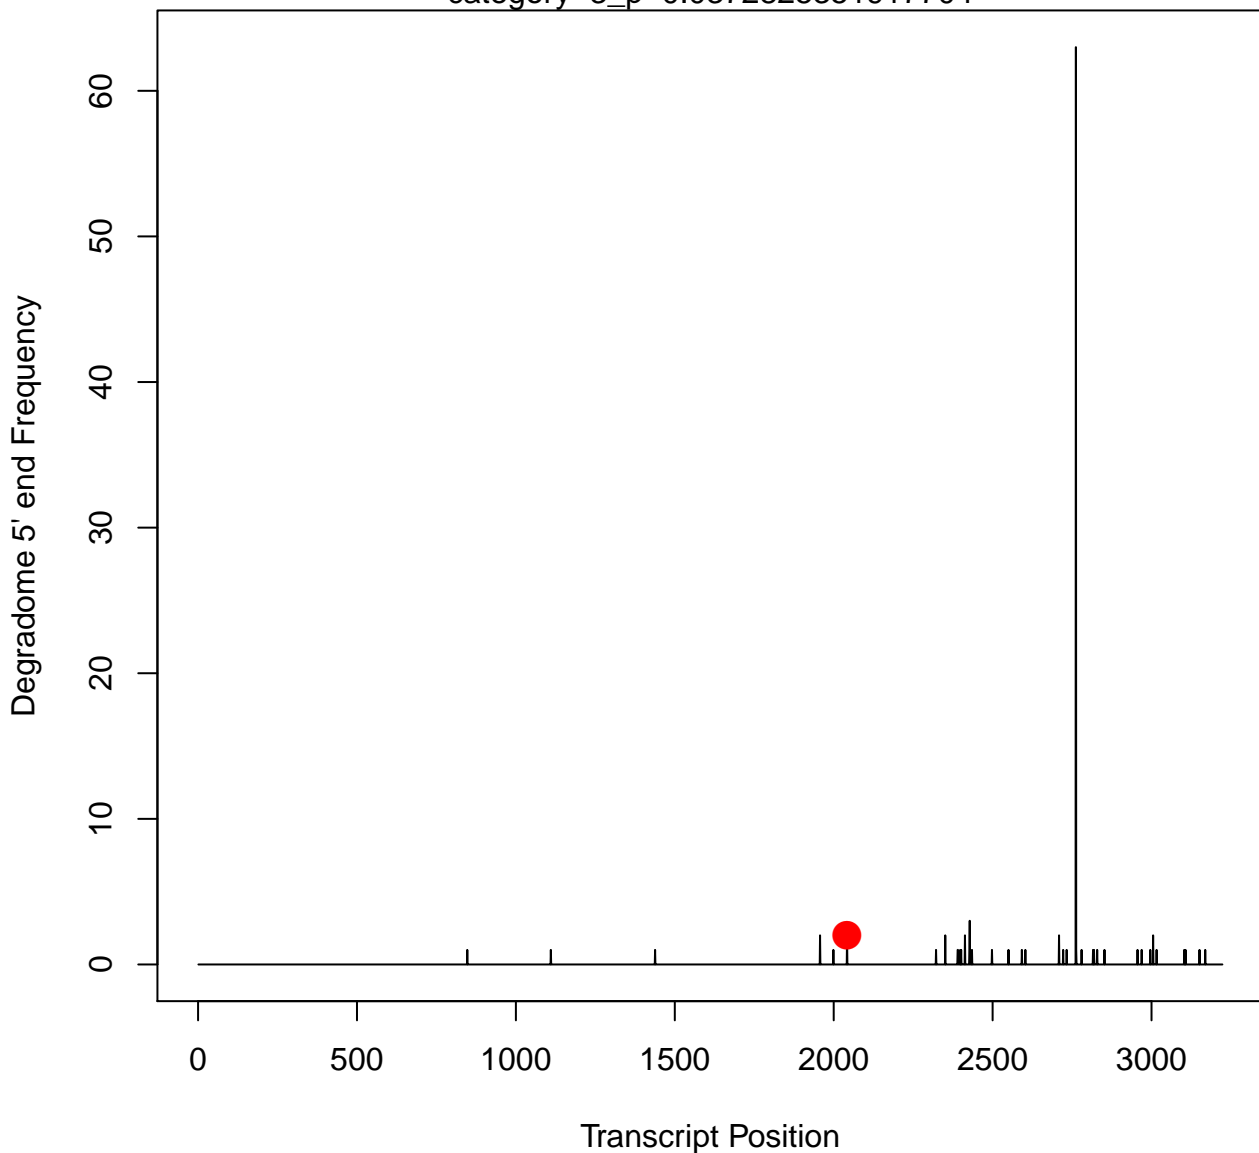

Supplement: s1 [file s1]

**T=Cluster-18410.107960\_Q=novel\_35\_S=494**

category=0\_p=0.00926018647366955

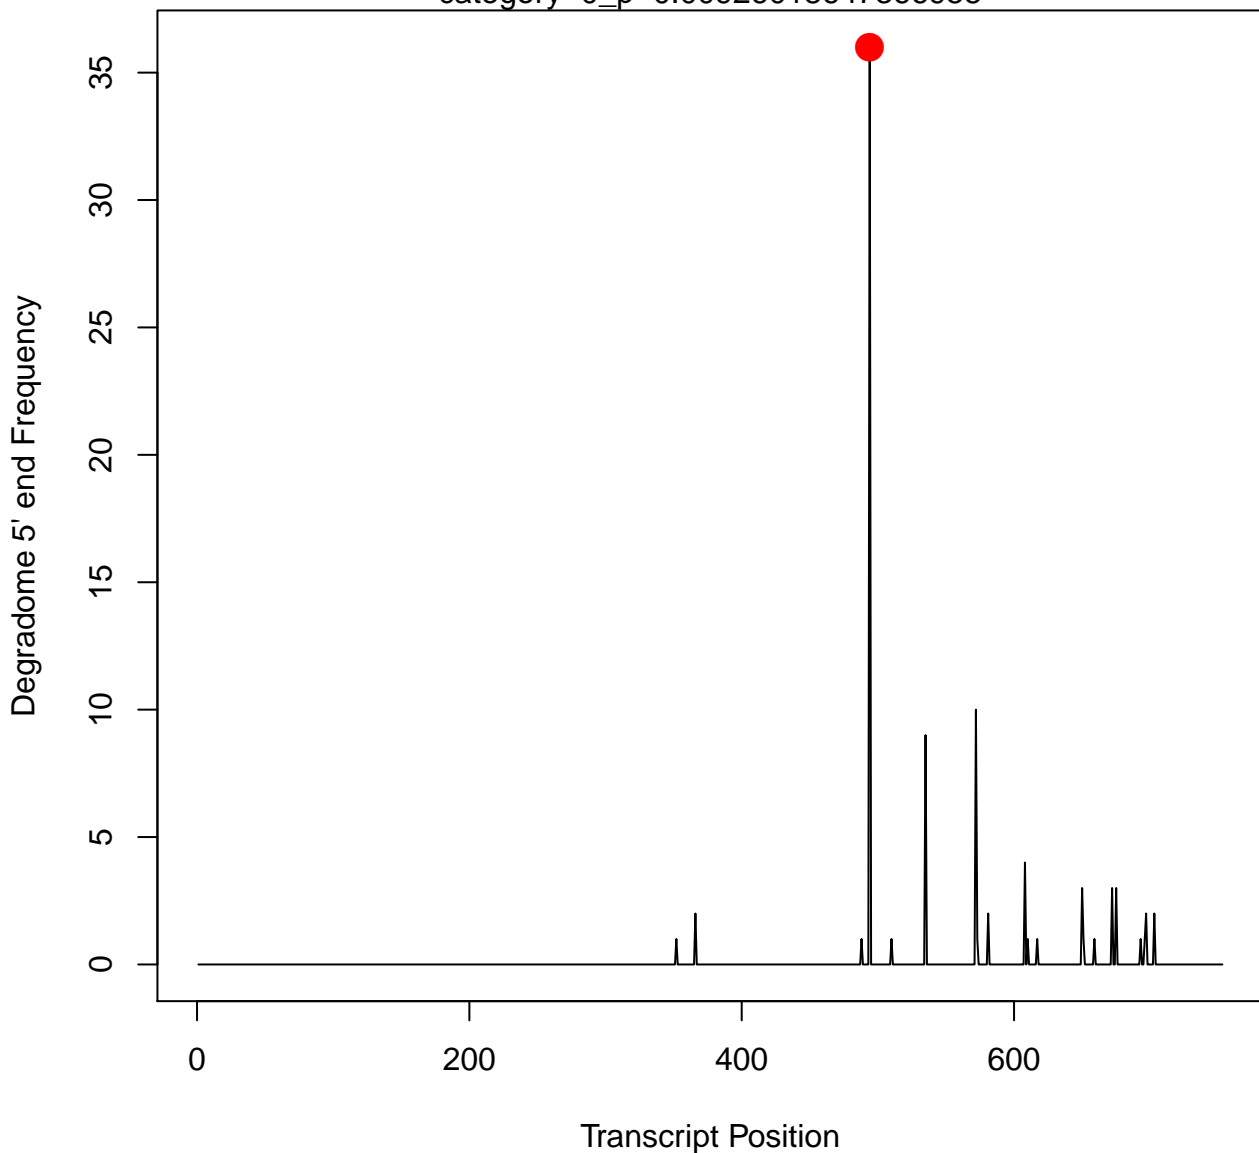

Supplement: s1 [file s1]

**T=Cluster-18410.26251\_Q=novel\_78\_S=232**

category=2\_p=0.0115490438418195

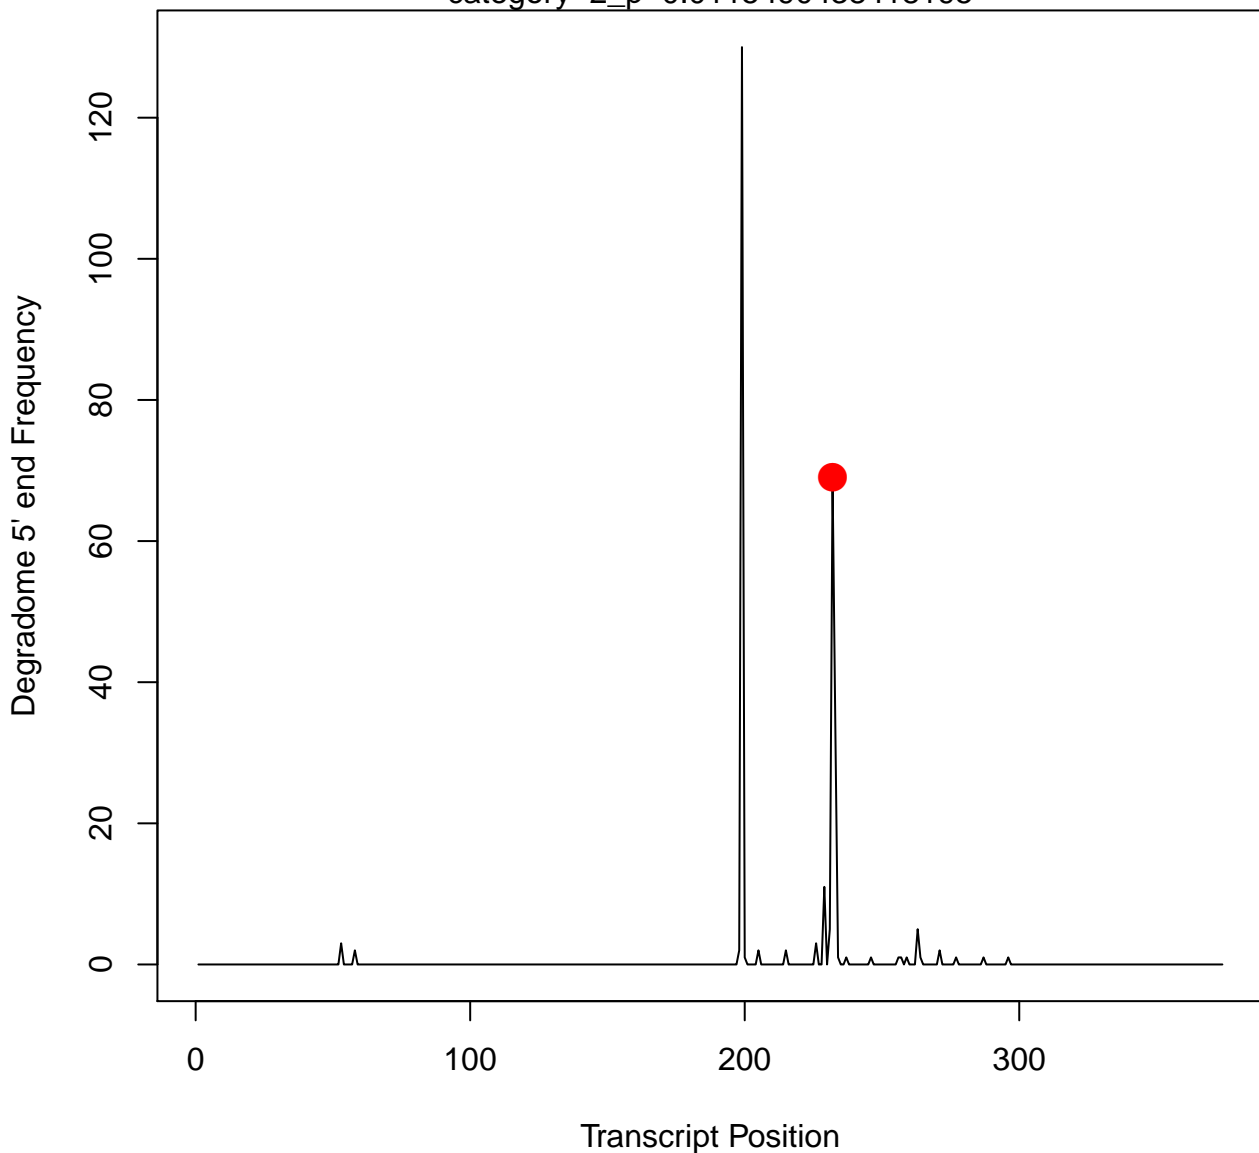

Supplement: s1 [file s1]

**T=Cluster-18410.88455\_Q=novel\_14\_S=280**

category=1\_p=0.0130167163381119

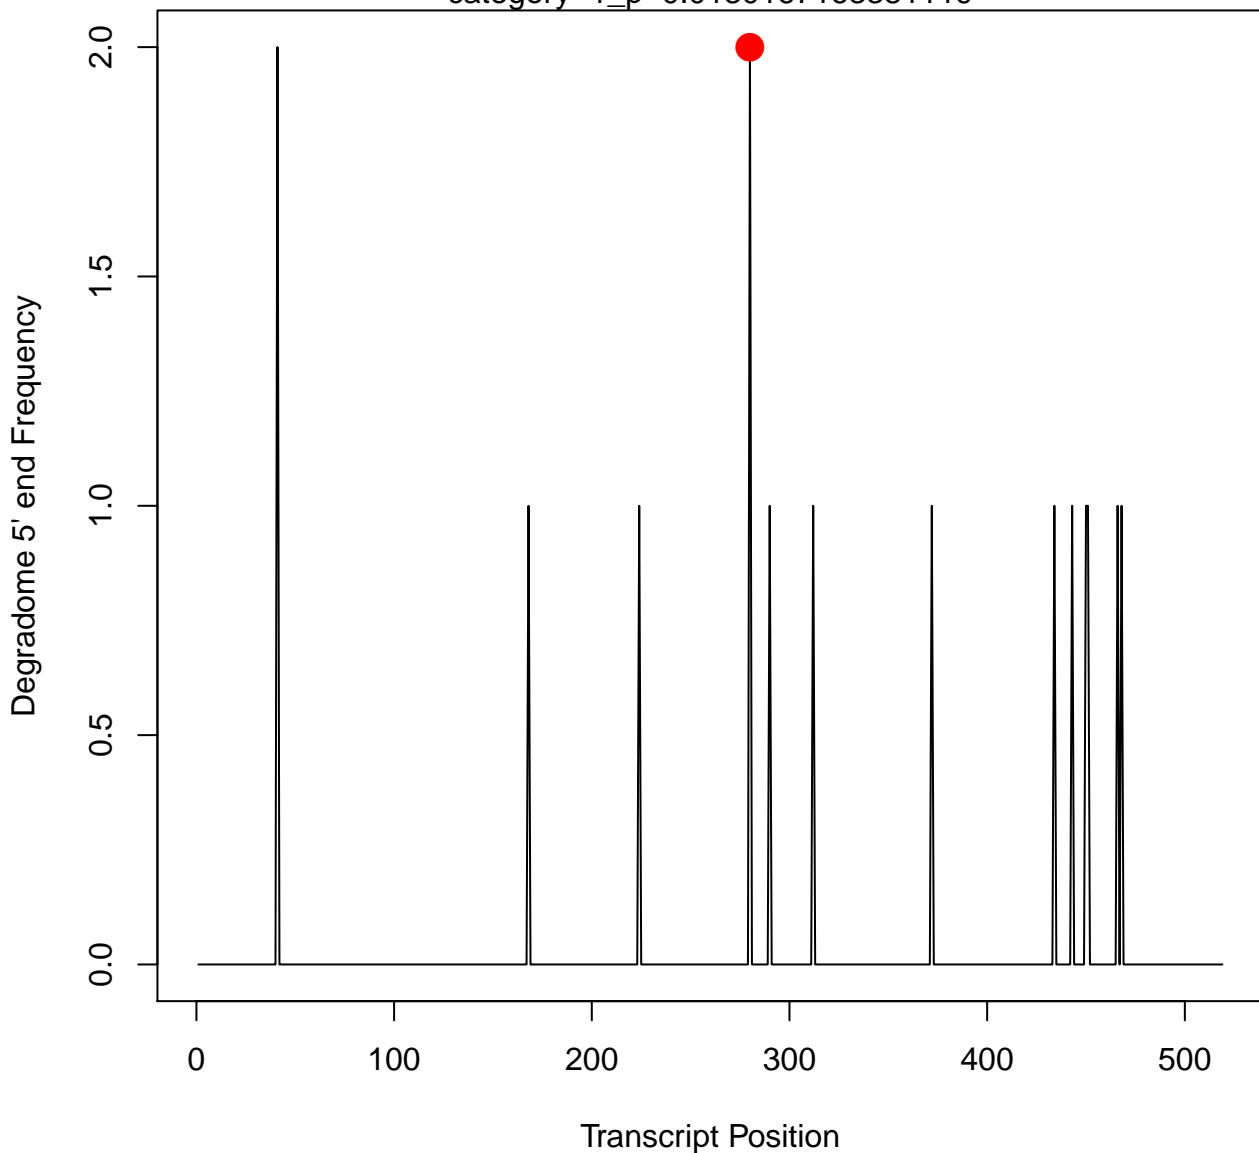

Supplement: s1 [file s1]

**T=Cluster-18410.87002\_Q=novel\_21\_S=152**

category=1\_p=0.0282920717540766

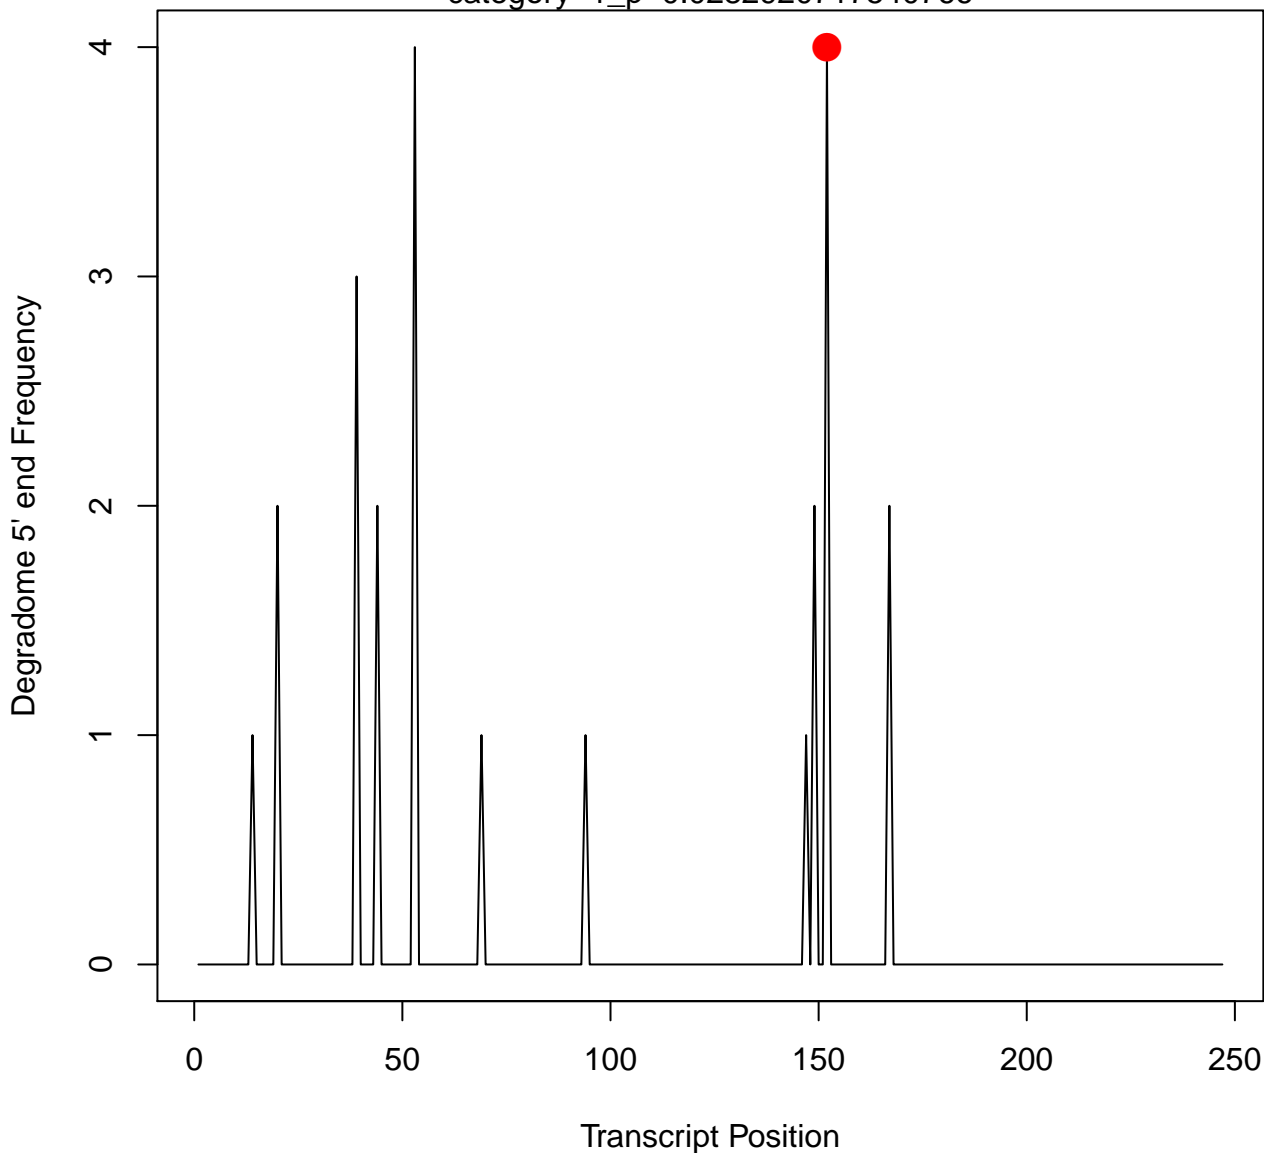

Supplement: s1 [file s1]

**T=Cluster-18410.107321\_Q=novel\_5\_S=375**

category=3\_p=0.0054131956921798

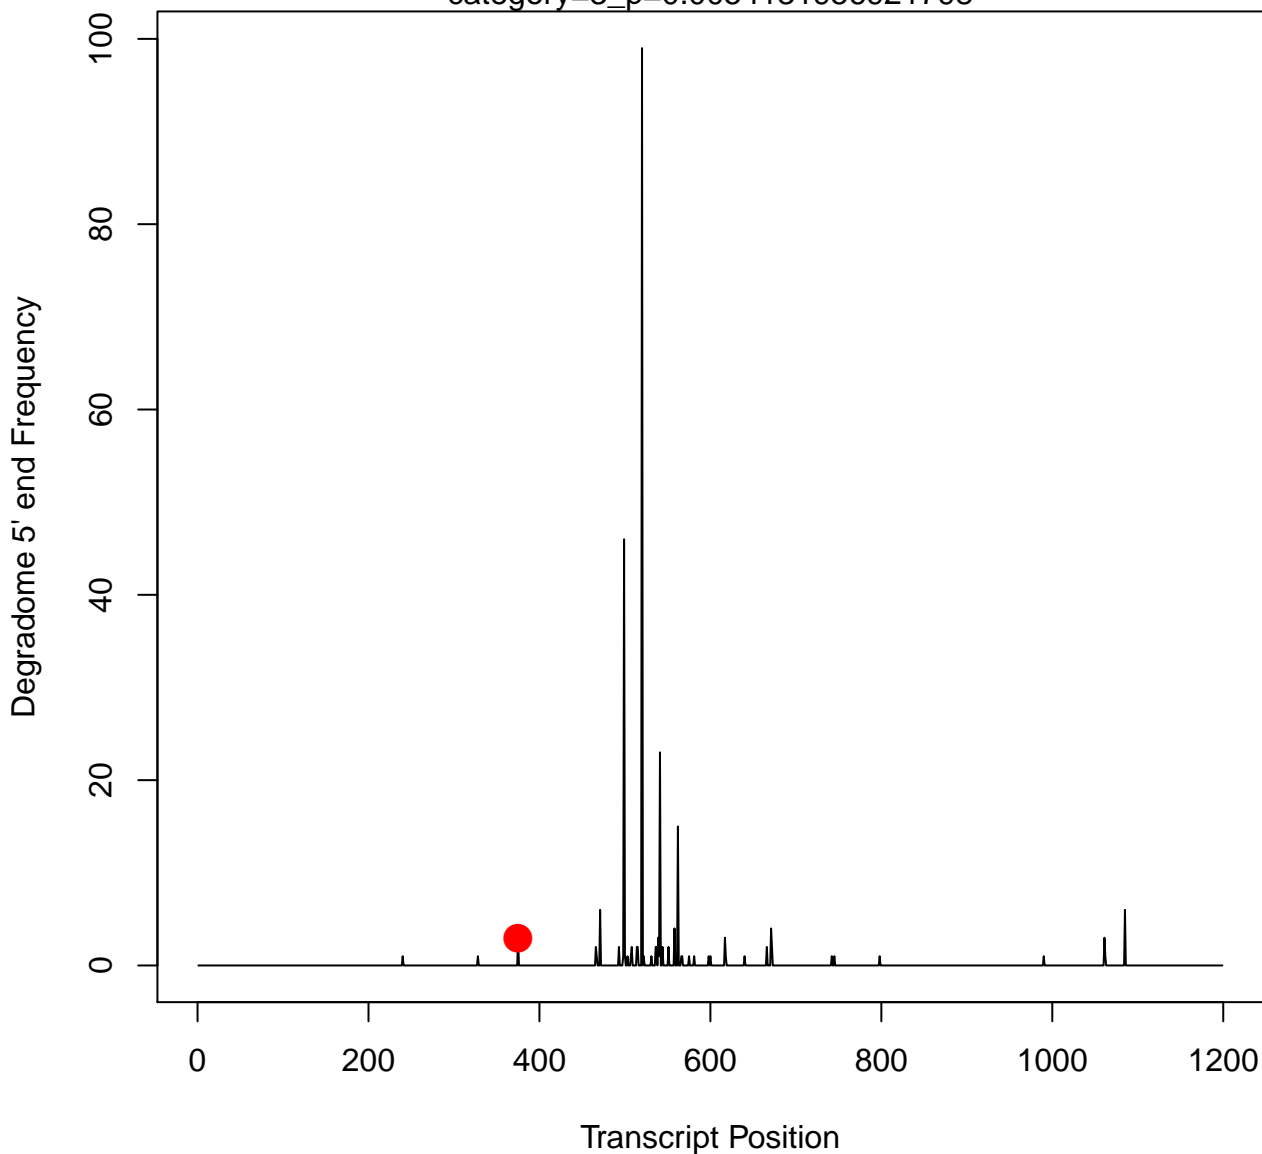

Supplement: s1 [file s1]

**T=Cluster-18410.13172\_Q=pma-miR951\_S=370**

category=0\_p=0.000820545098840553

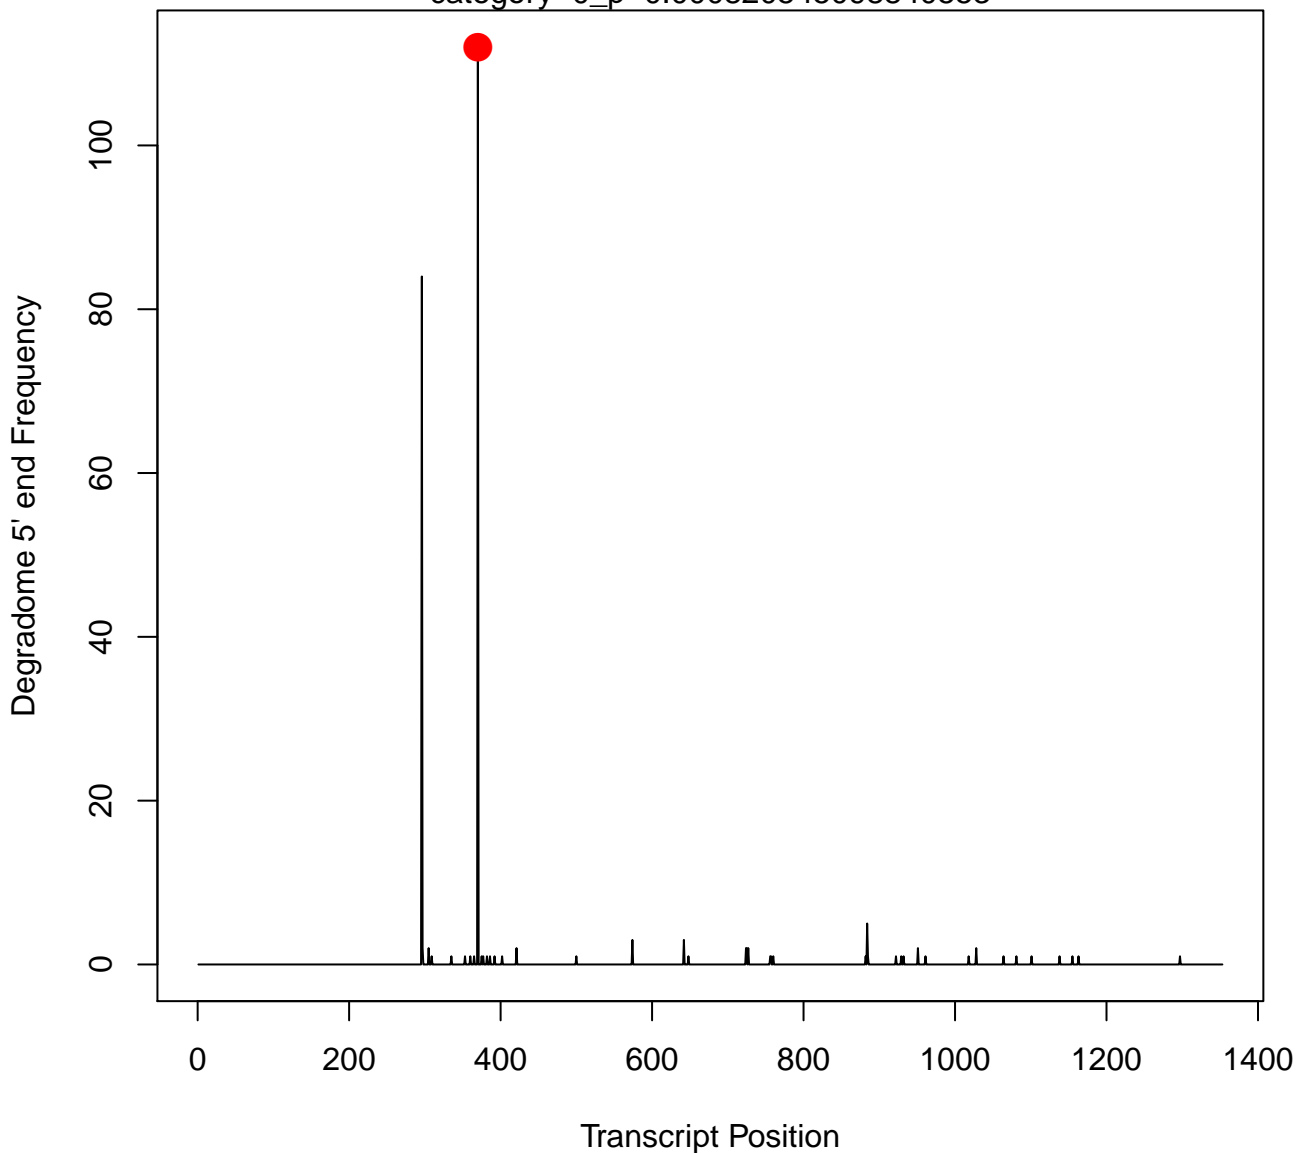

Supplement: s1 [file s1]

**T=Cluster-18410.21518\_Q=pma-miR946a-3p\_S=819**

category=4\_p=0.0483072886549676

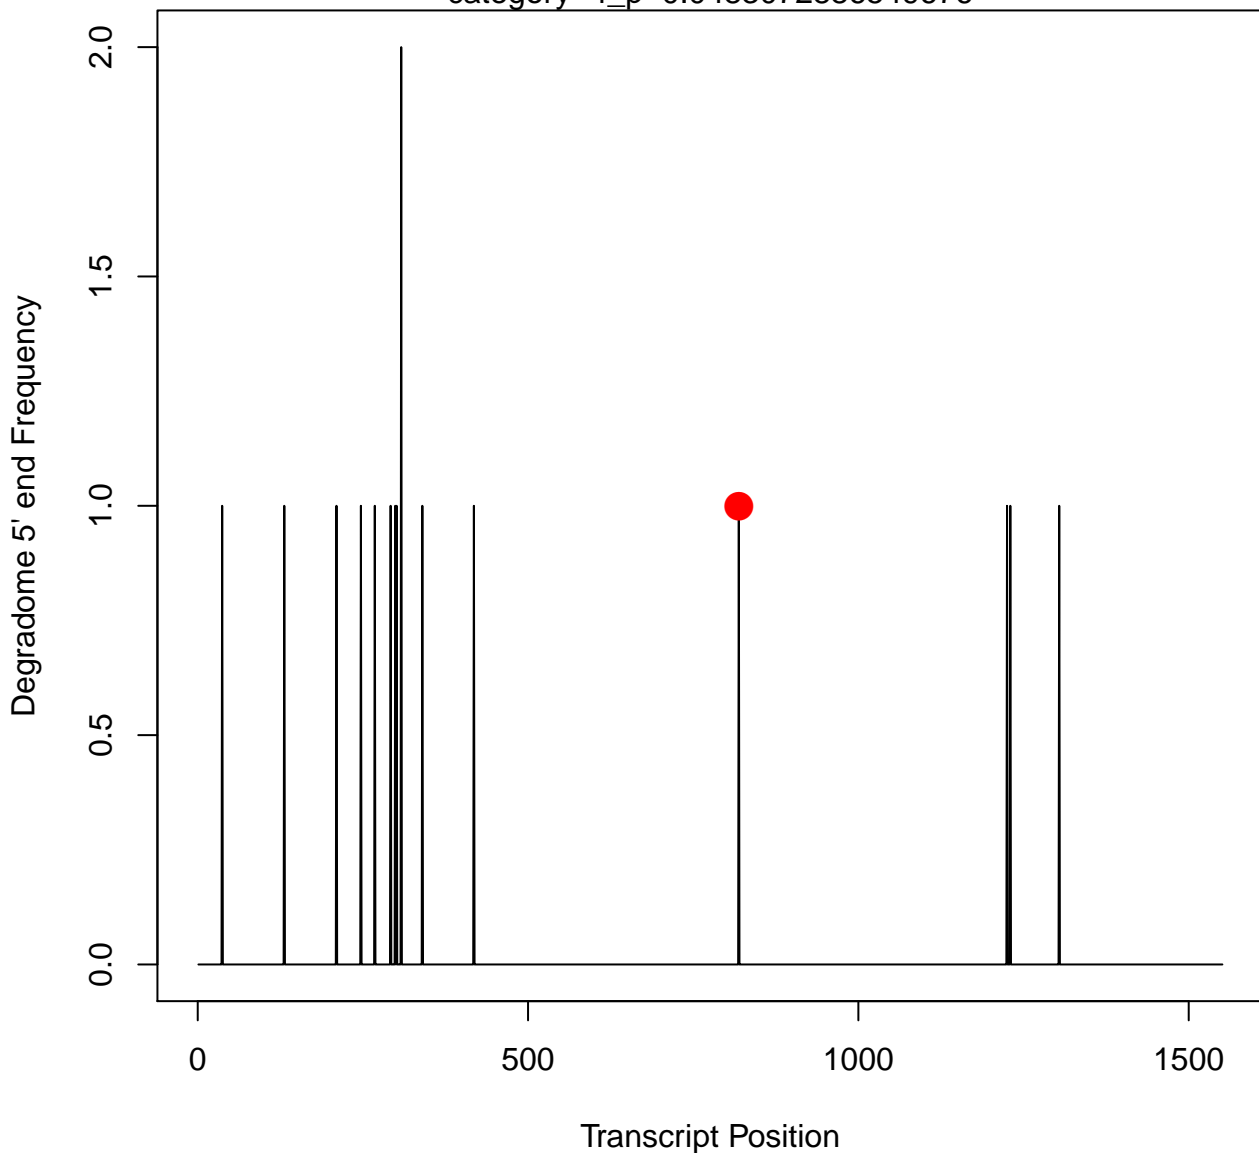

Supplement: s1 [file s1]

**T=Cluster-18410.96126\_Q=novel\_7\_S=361**

category=0\_p=0.0815778112045076

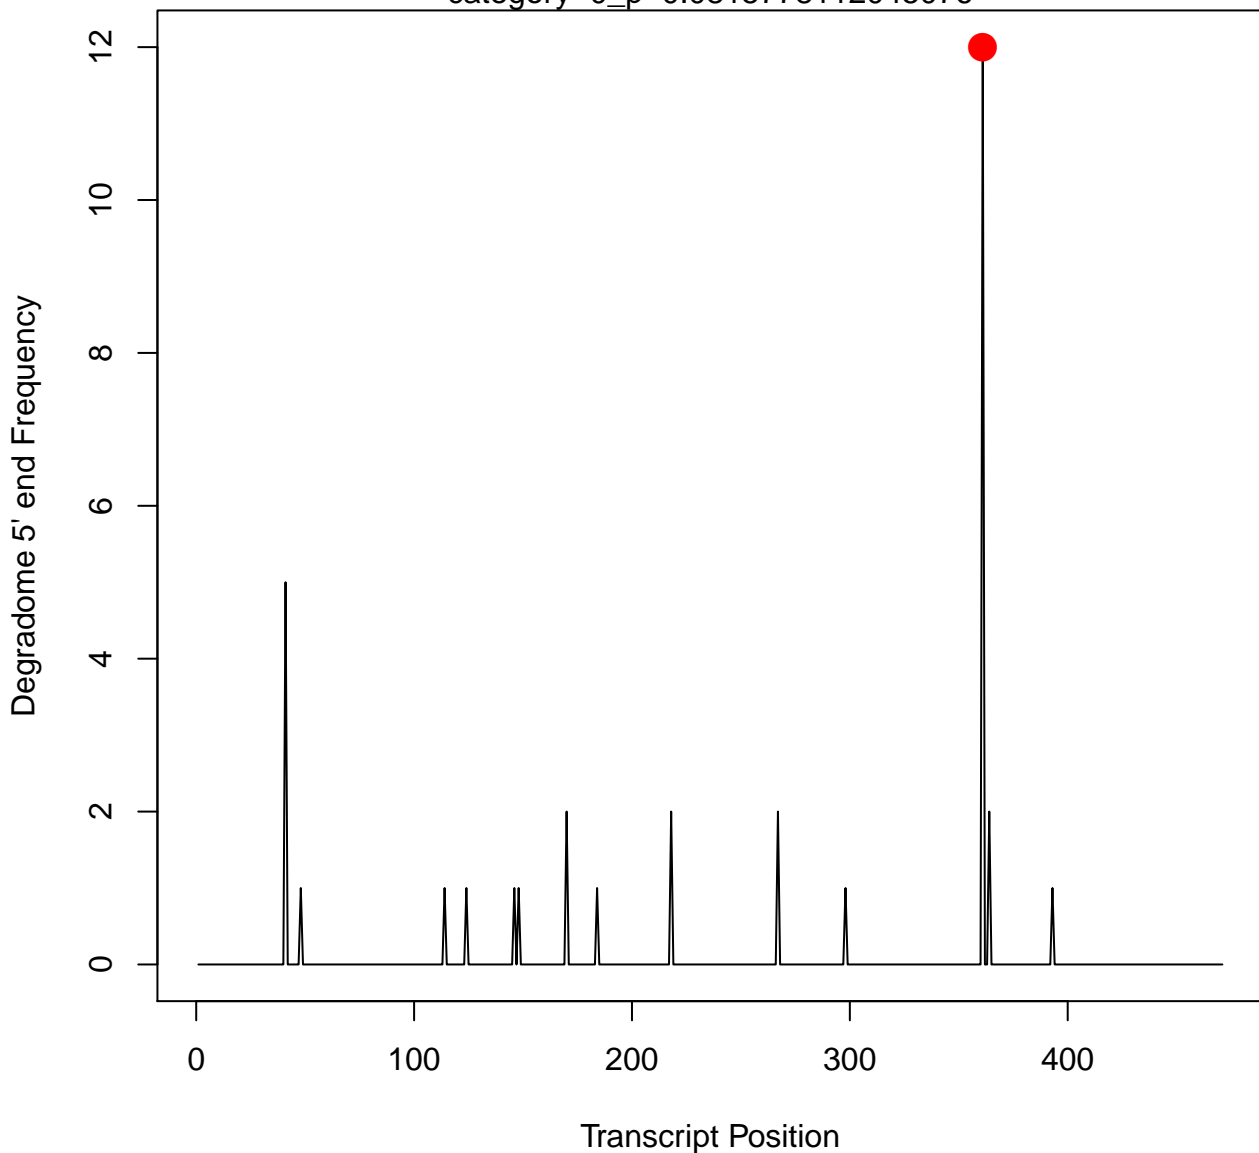

Supplement: s1 [file s1]

**T=Cluster-18410.77473\_Q=pma-miR319\_S=569**

category=2\_p=0.0229647072699788

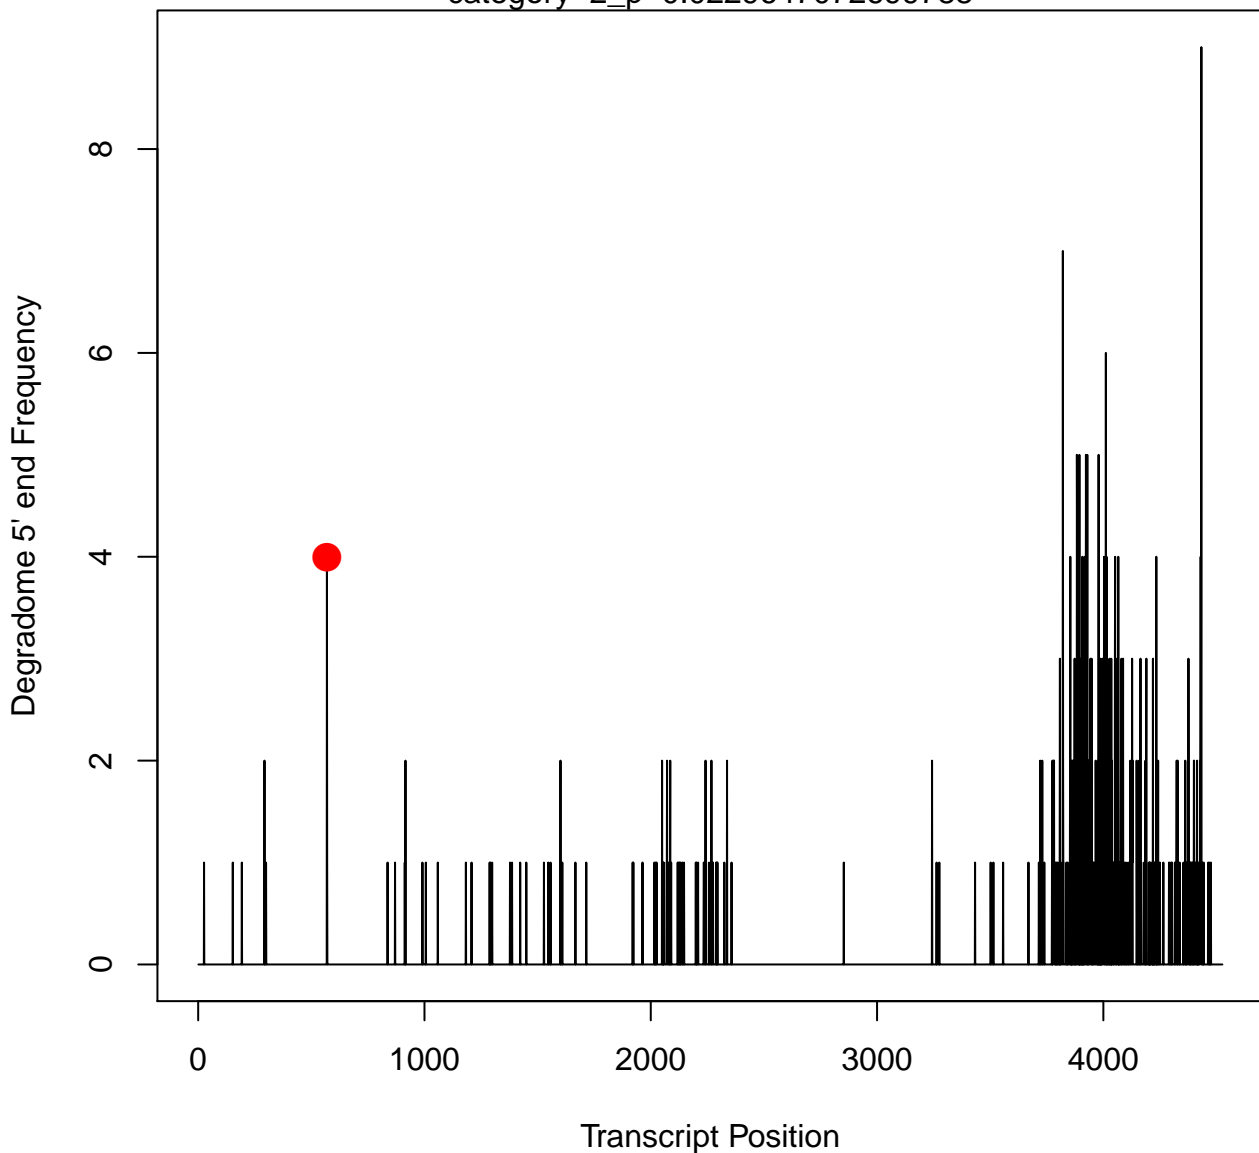

Supplement: s1 [file s1]

**T=Cluster-18410.15176\_Q=novel\_114\_S=1237**

category=0\_p=0.0106147270149937

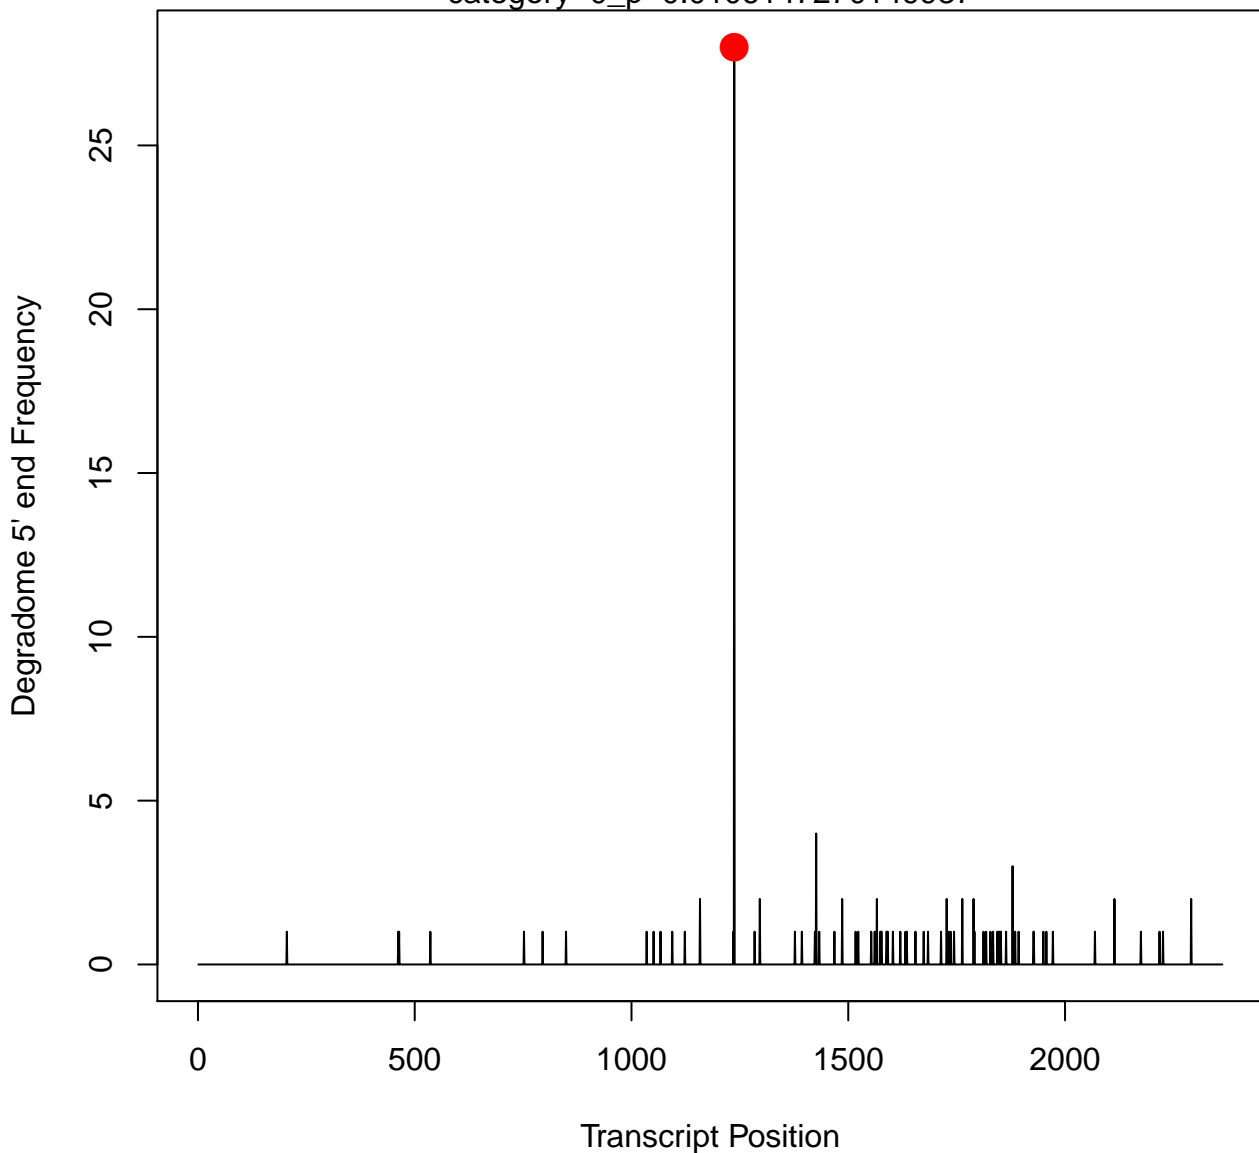

Supplement: s1 [file s1]

**T=Cluster-18410.19607\_Q=novel\_47\_S=152**

category=0\_p=0.0173597013695821

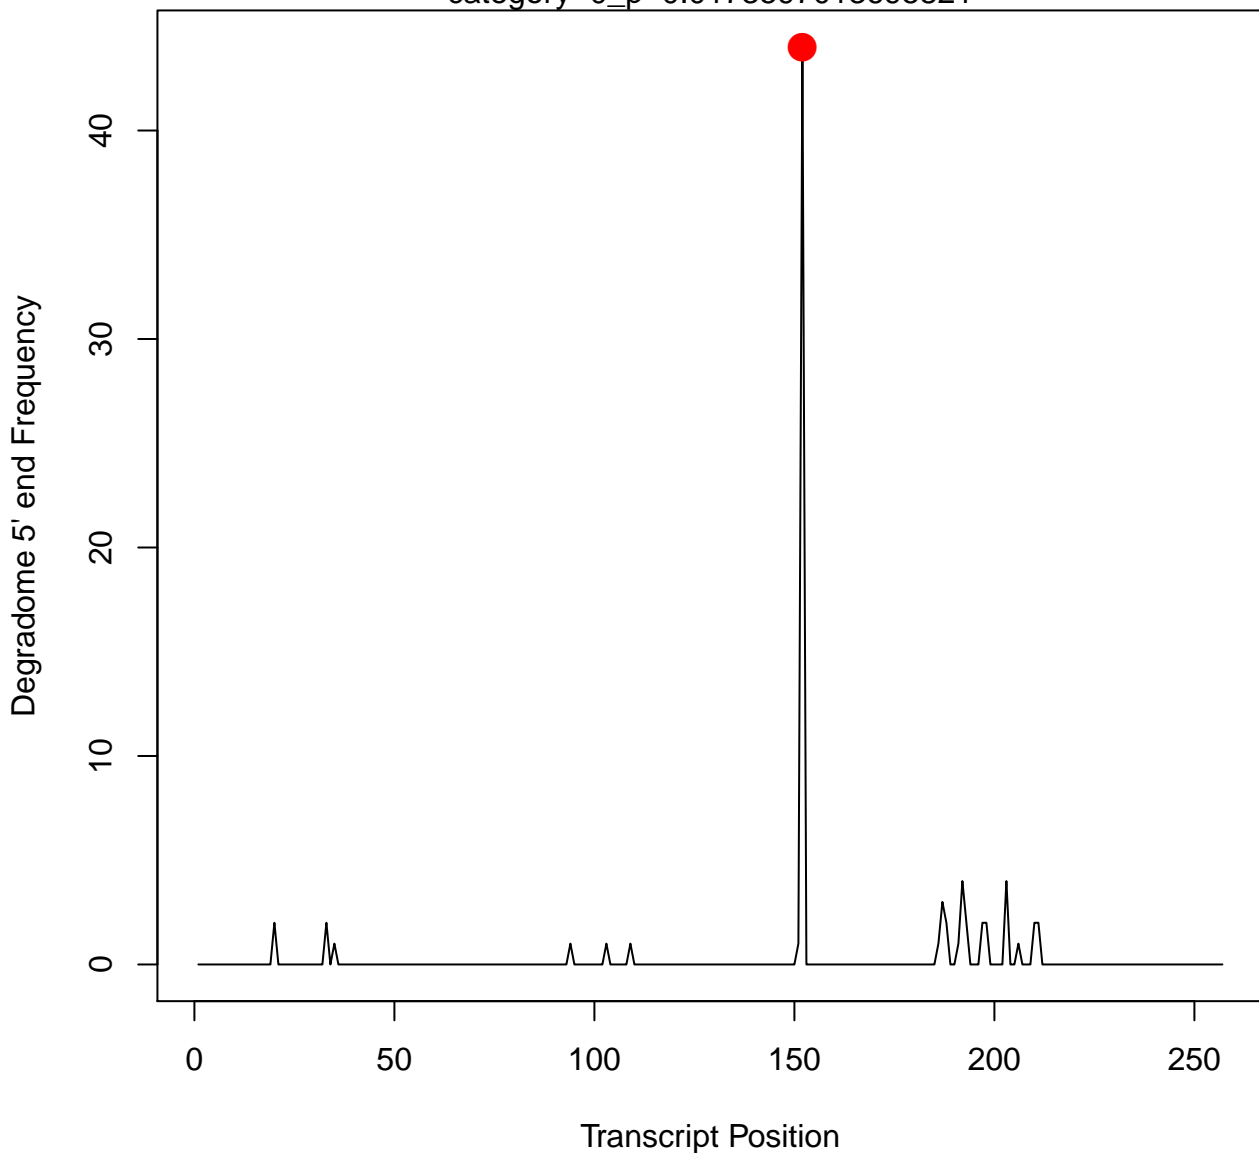

Supplement: s1 [file s1]

**T=Cluster-18410.34413\_Q=novel\_188\_S=1102**

category=0\_p=0.0910779401480348

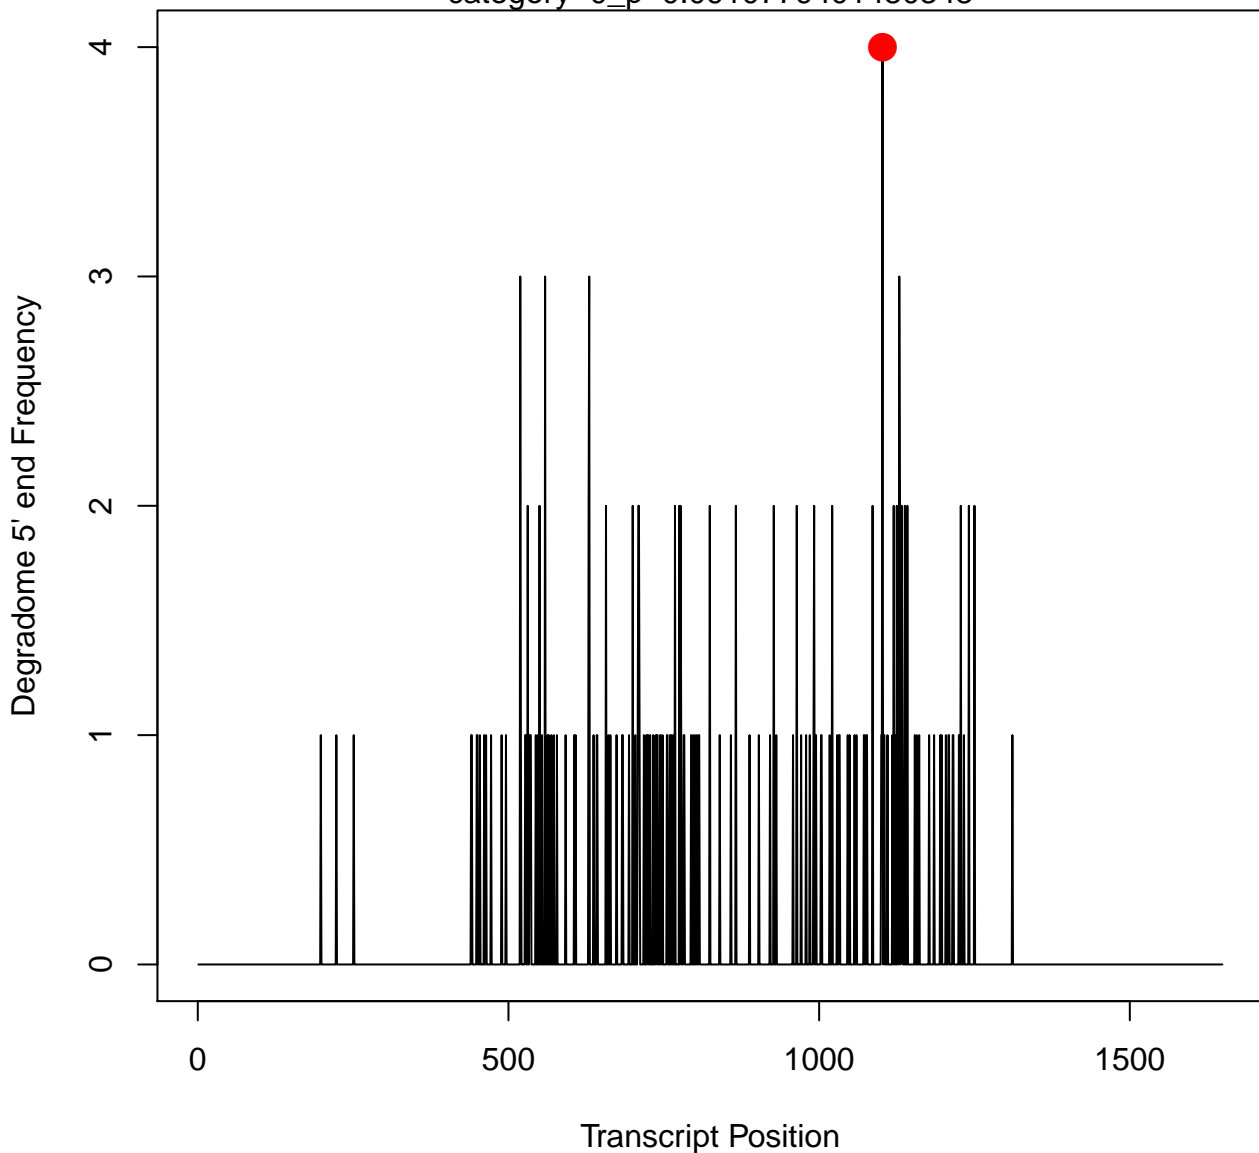

Supplement: s1 [file s1]

**T=Cluster-18410.98578\_Q=novel\_23\_S=1068**

category=0\_p=0.000820545098840553

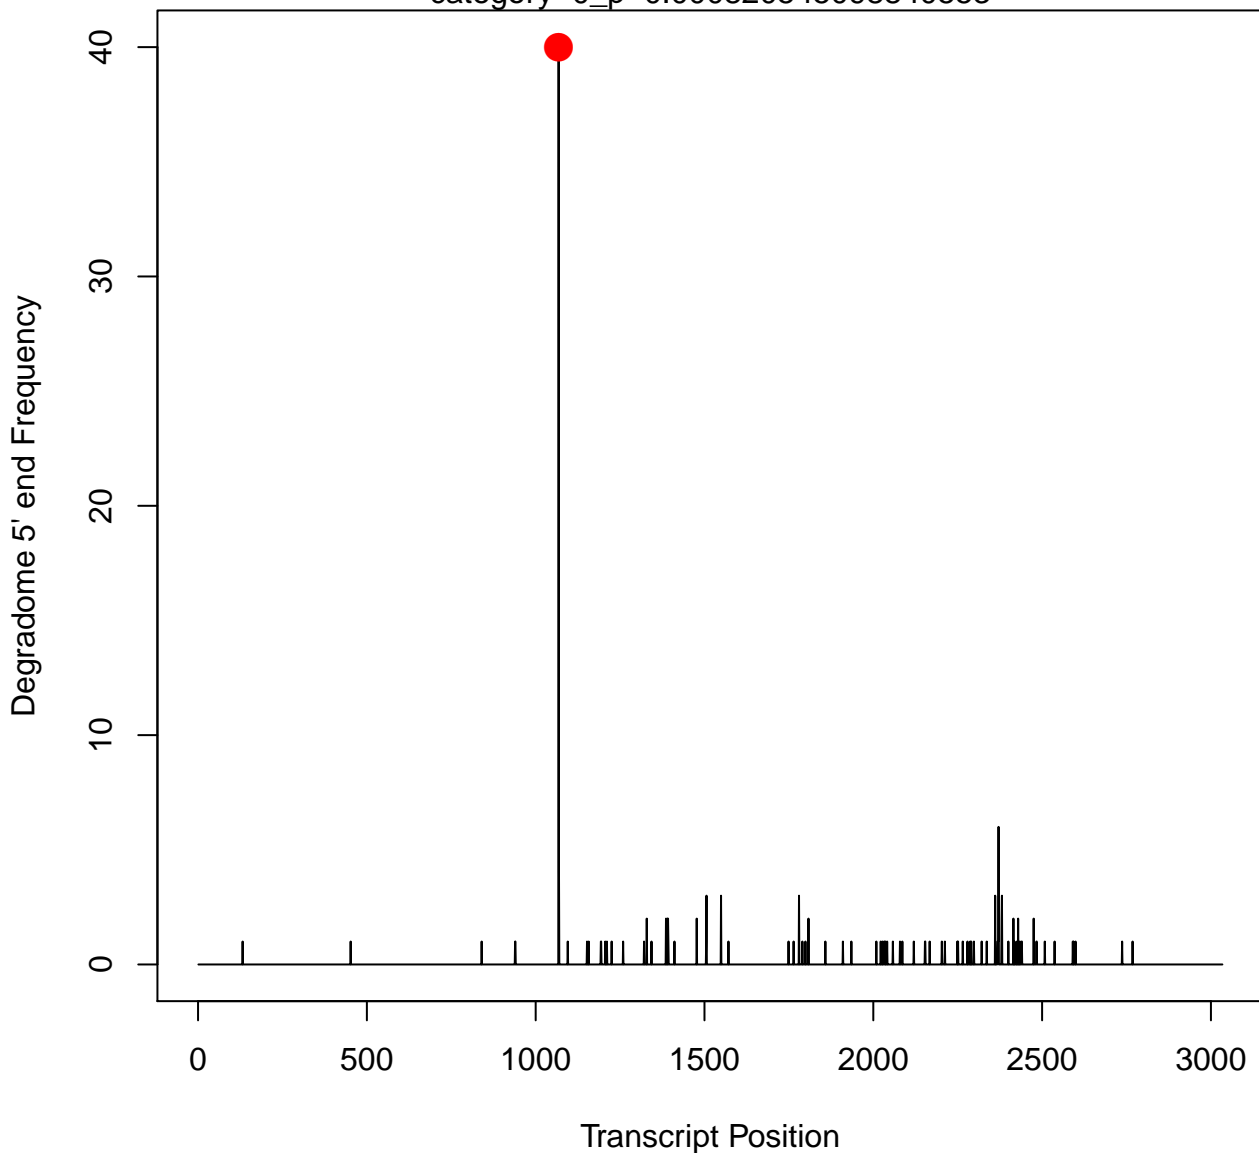

Supplement: s1 [file s1]

**T=Cluster-18410.36494\_Q=novel\_151\_S=476**

category=2\_p=0.0342485307007228

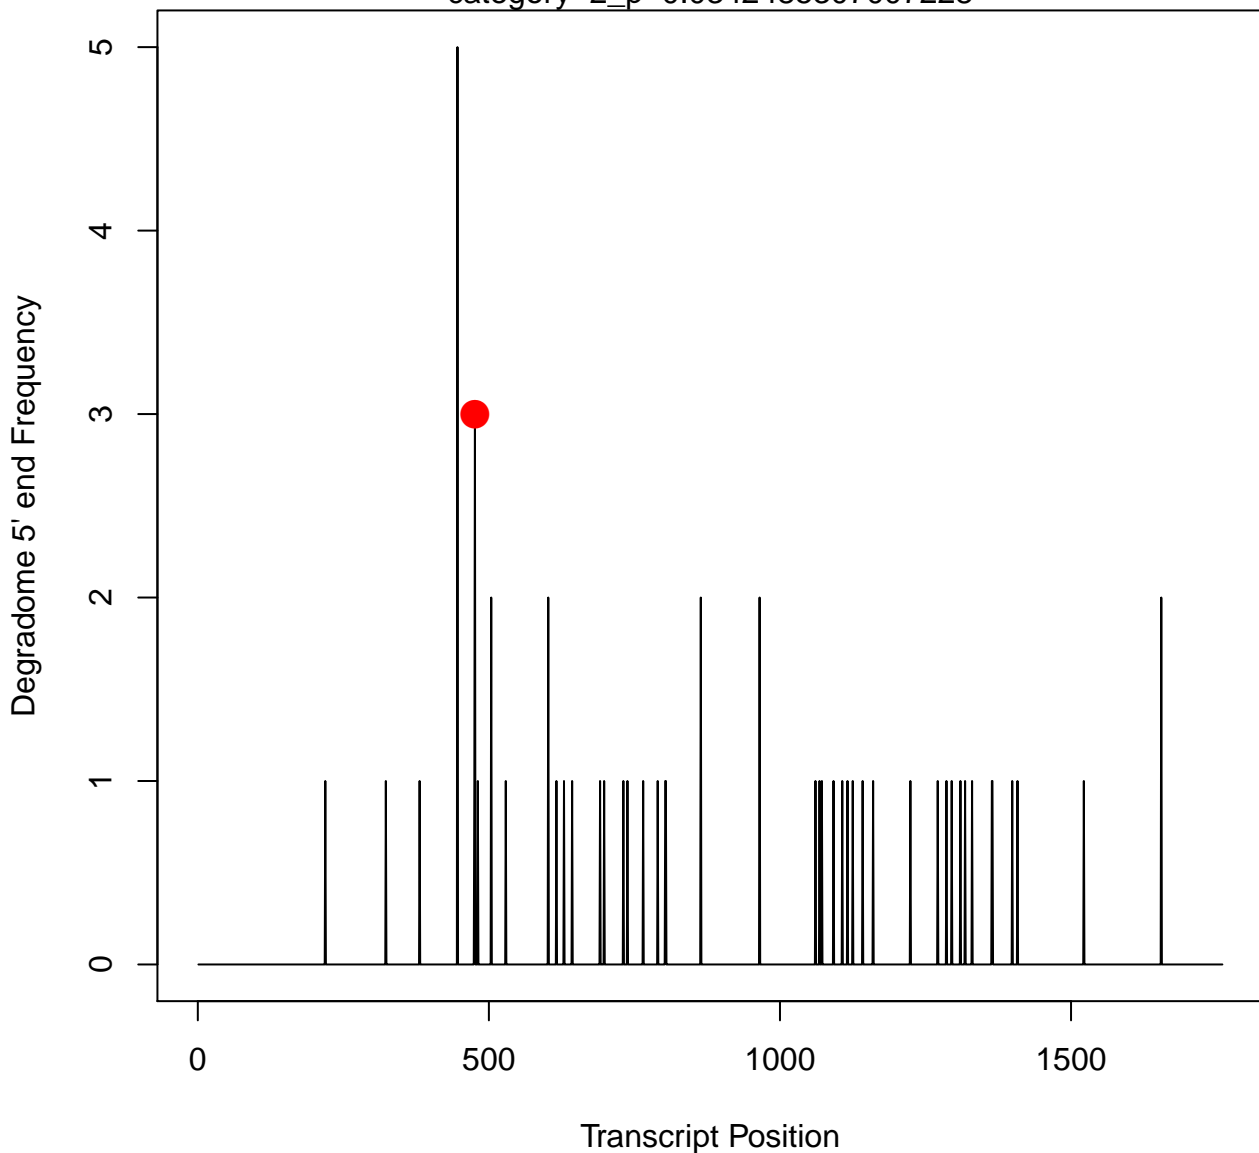

Supplement: s1 [file s1]

**T=Cluster-18410.56597\_Q=novel\_113\_S=924**

category=0\_p=0.00654553945797942

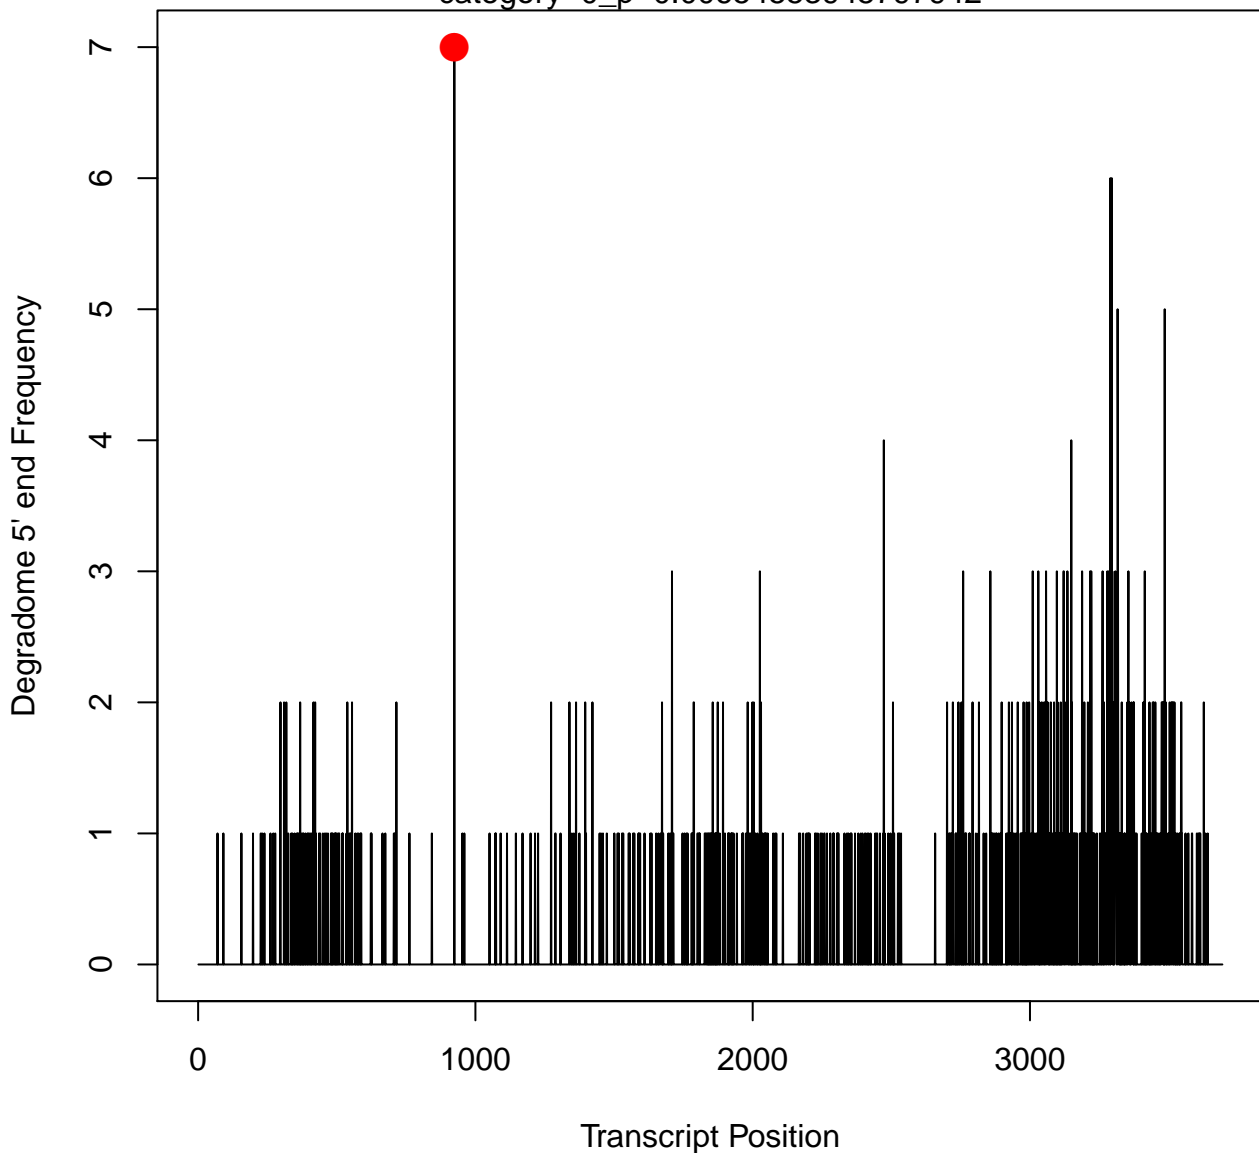

Supplement: s1 [file s1]
