# Supplementary figures and images for: Uncovering miRNA-mRNA Regulatory Modules in Developing Xylem of Pinus massoniana via Small RNA and Degradome Sequencing (part 9 of 9)
Source: MDPI journal article supplement (doi:10.3390/ijms221810154), 2021-09-21

**T=Cluster-18410.1903\_Q=pma-miR482a\_S=185**

category=0\_p=0.00817521894783257

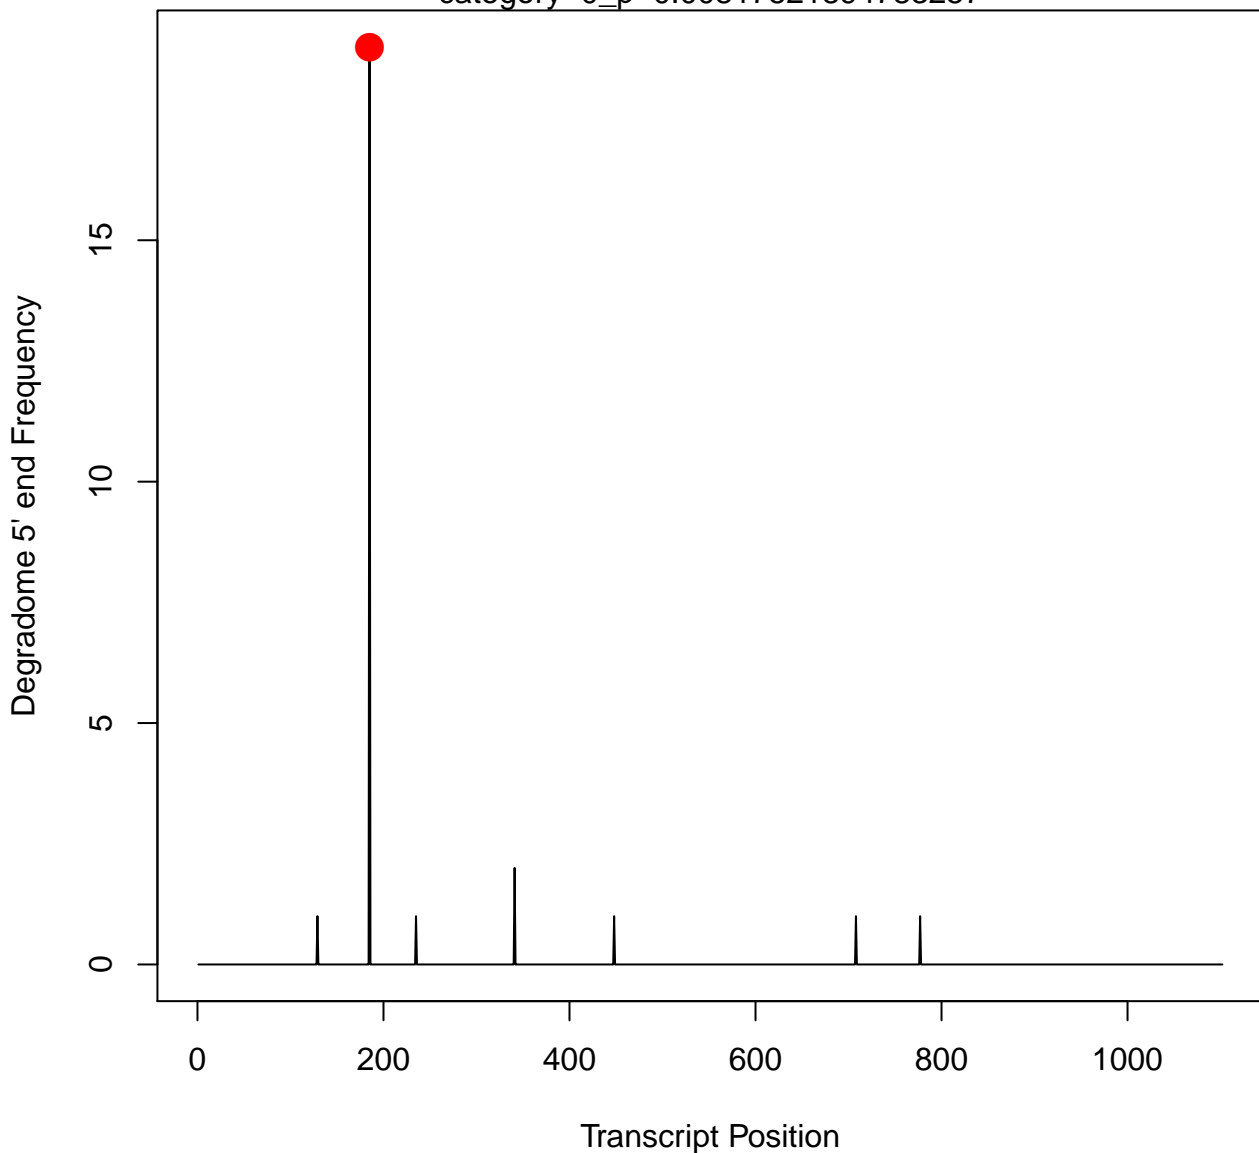

Supplement: s1 [file s1]

**T=Cluster-18410.29750\_Q=novel\_59\_S=242**

category=4\_p=0.0942809831727407

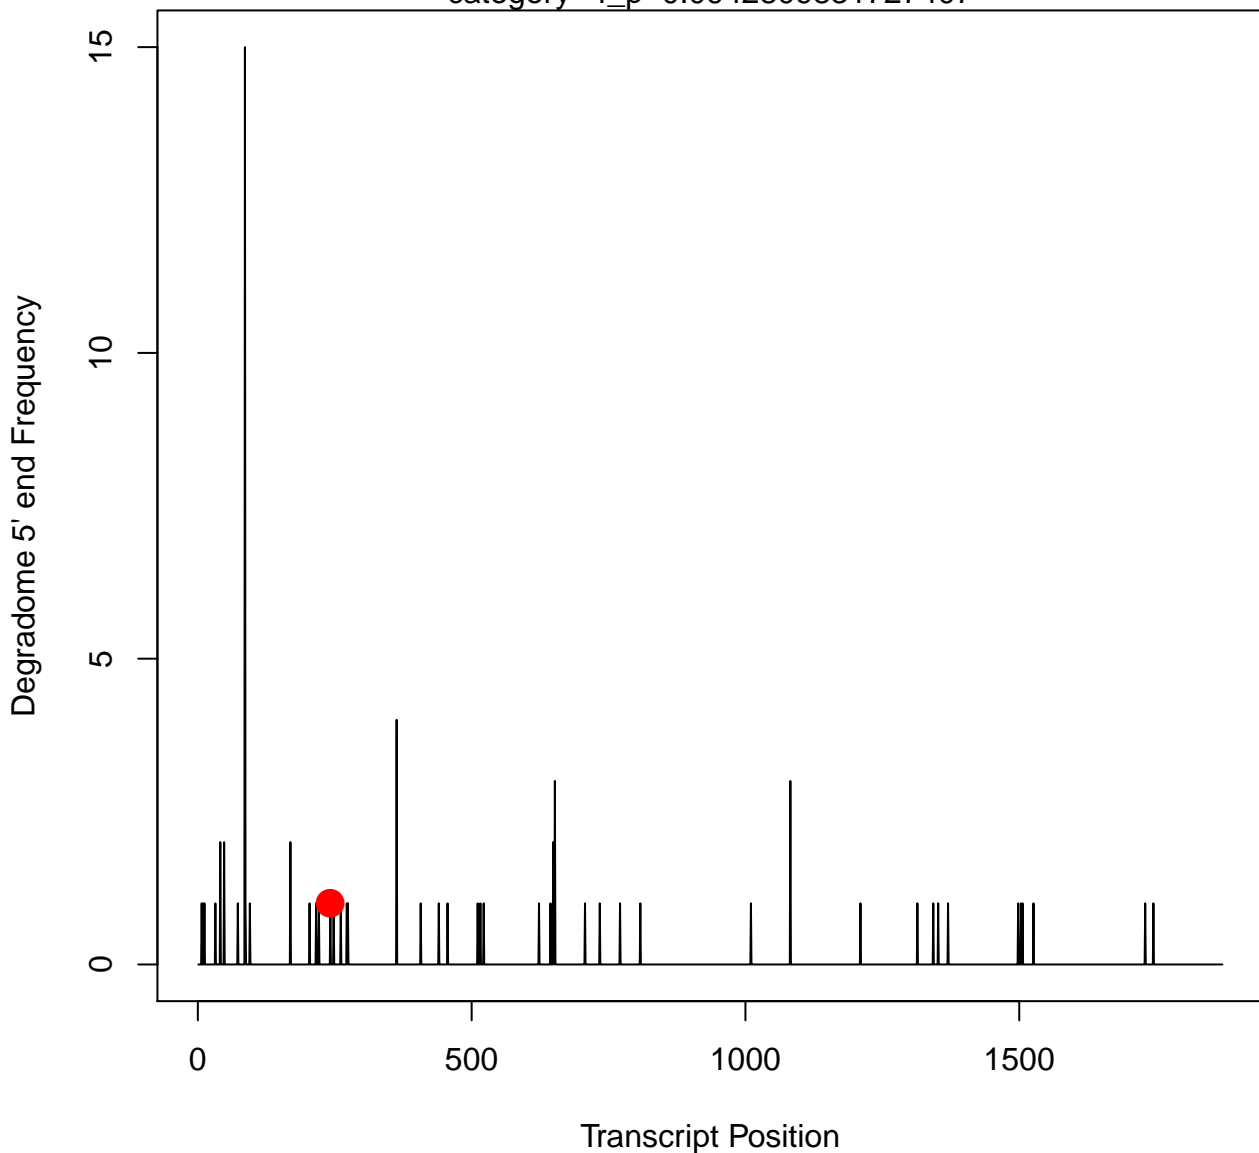

Supplement: s1 [file s1]

**T=Cluster-18410.42830\_Q=pma-miR951\_S=271**

category=0\_p=0.0245926352253105

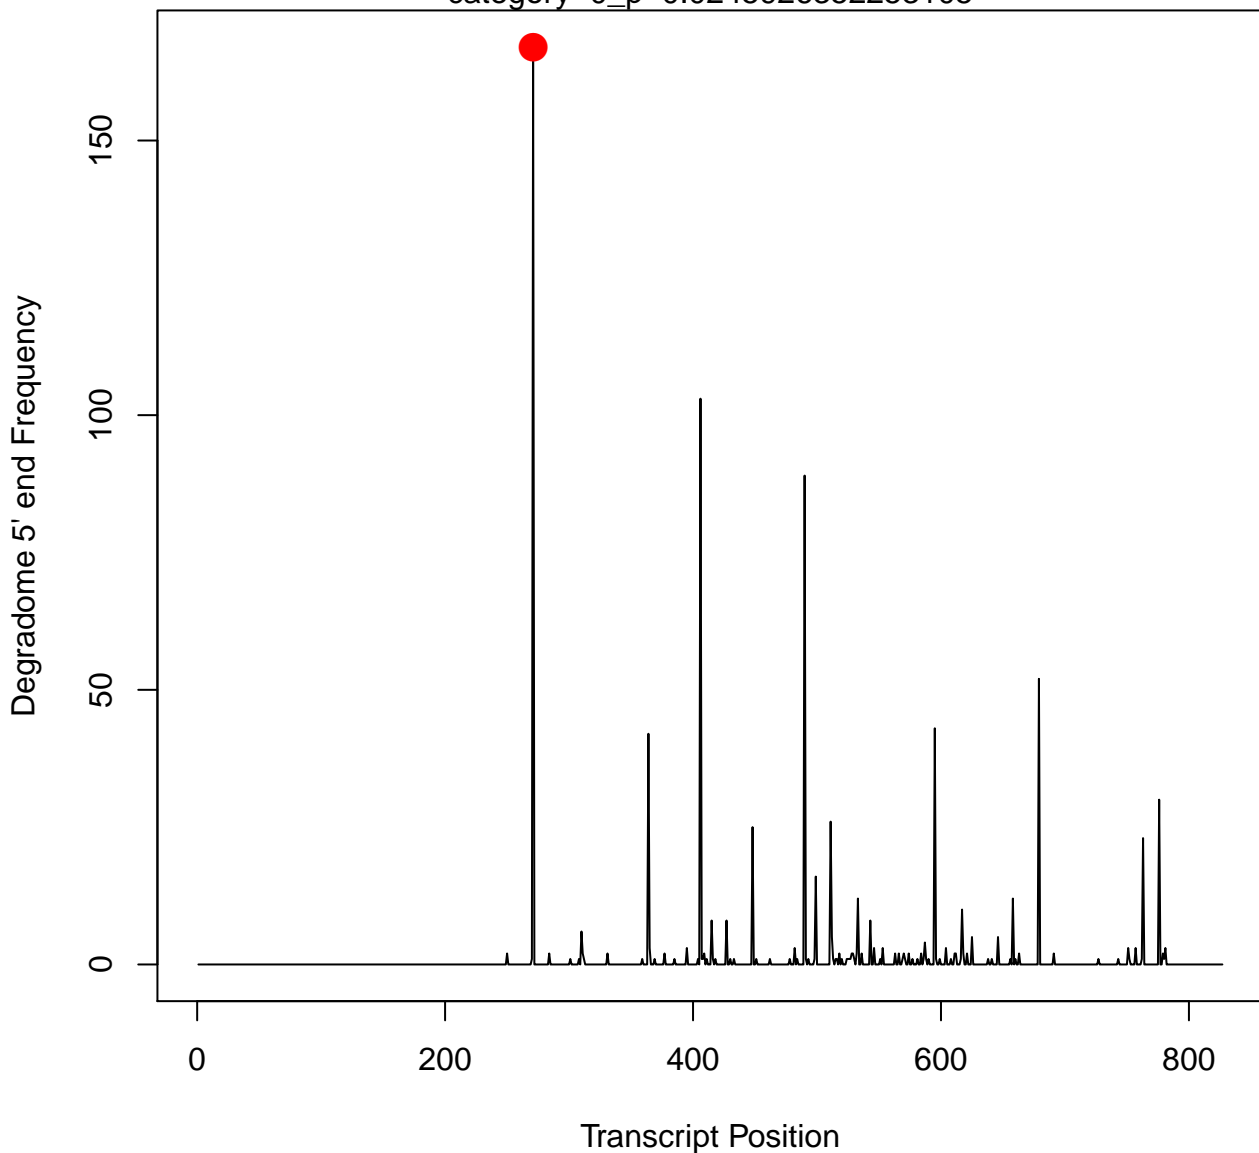

Supplement: s1 [file s1]

**T=Cluster-18410.77472\_Q=pma-miR159a\_S=569**

category=2\_p=0.0564267304887326

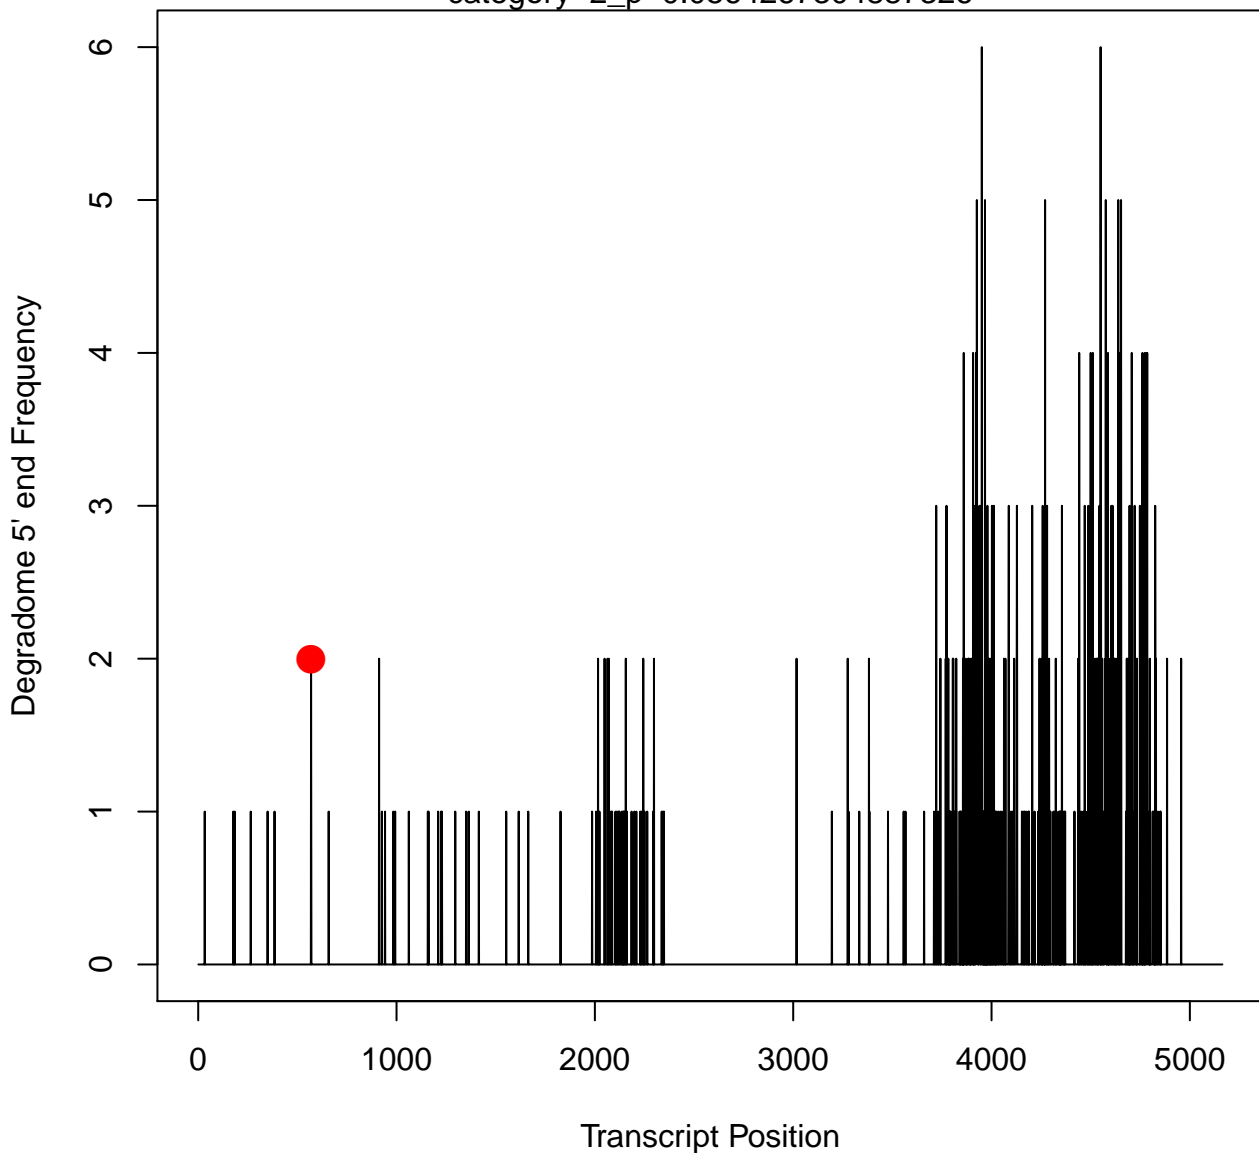

Supplement: s1 [file s1]

**T=Cluster-18410.82446\_Q=novel\_175\_S=1095**

category=1\_p=0.0231251615912931

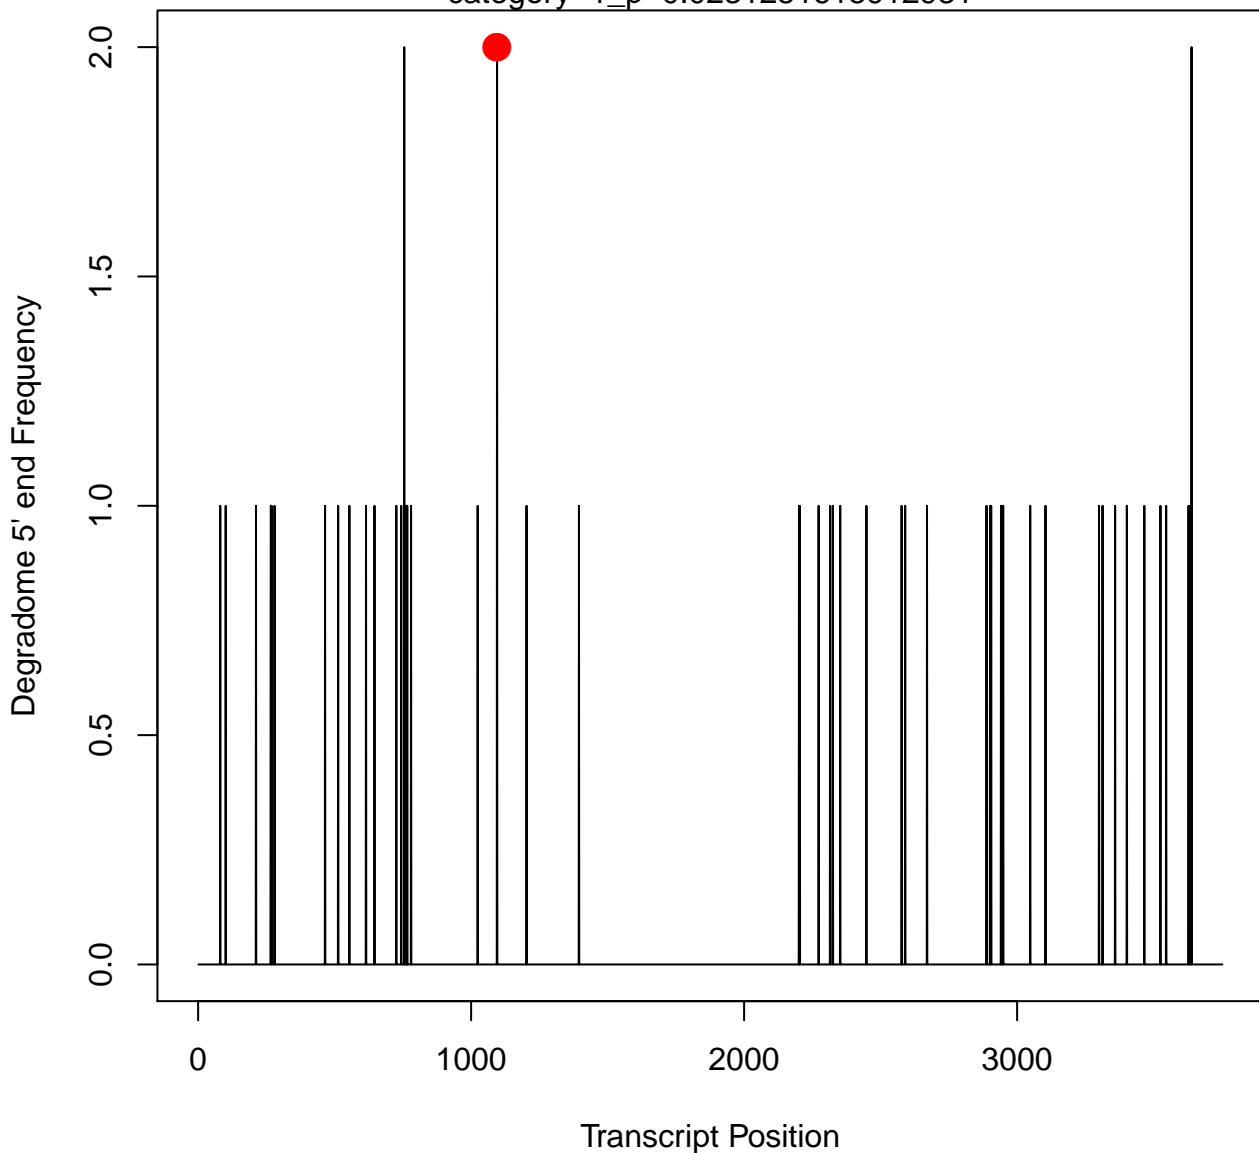

Supplement: s1 [file s1]

**T=Cluster-18410.43196\_Q=pma-miR482a\_S=97**

category=0\_p=0.00191355797950399

Degradome 5' end Frequency

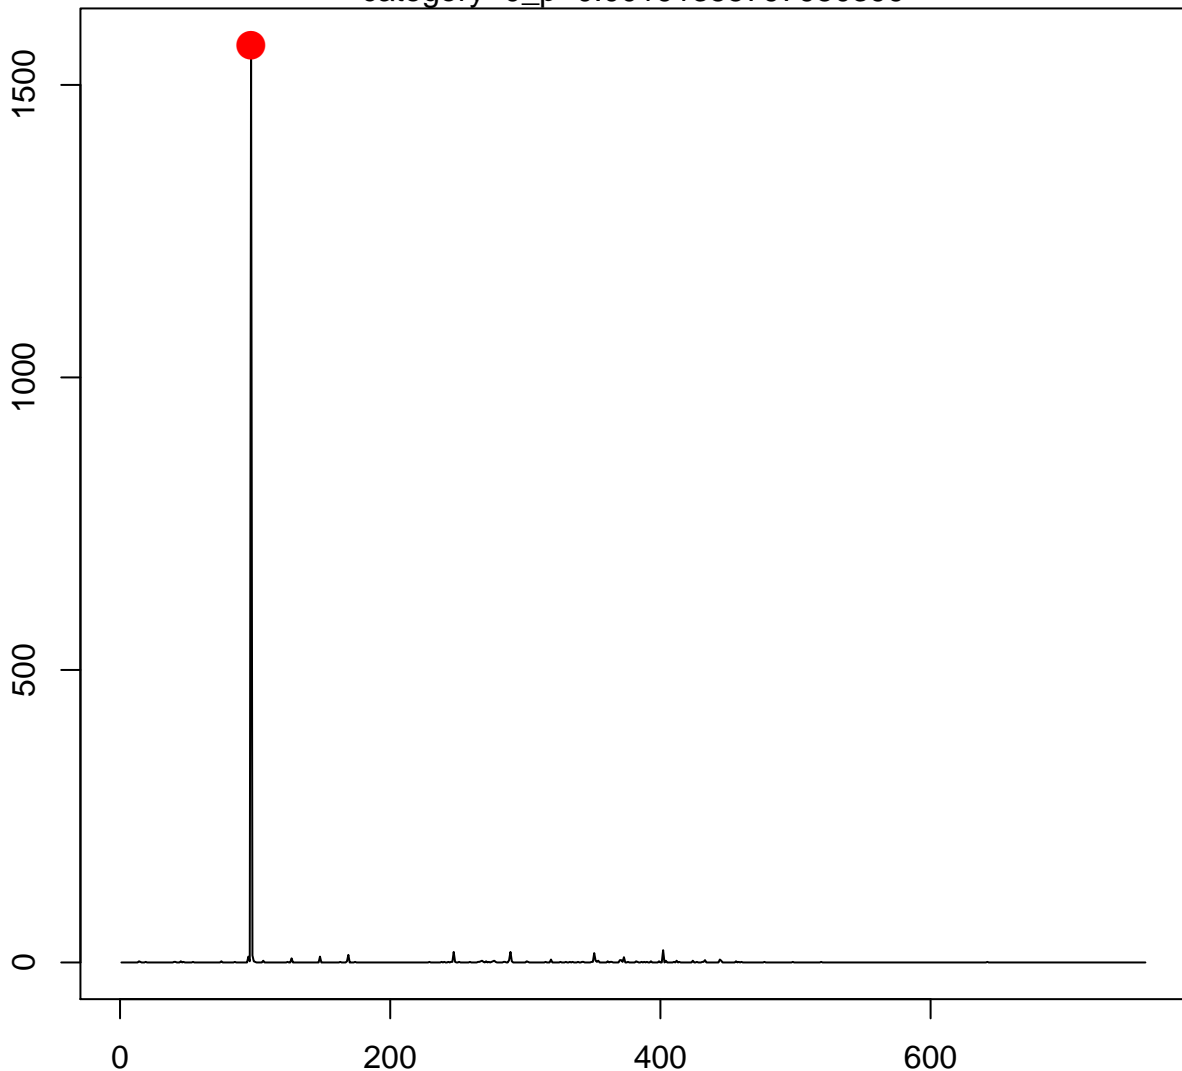

Transcript Position

Supplement: s1 [file s1]

**T=Cluster-18410.53558\_Q=novel\_47\_S=221**

category=0\_p=0.0285879019128199

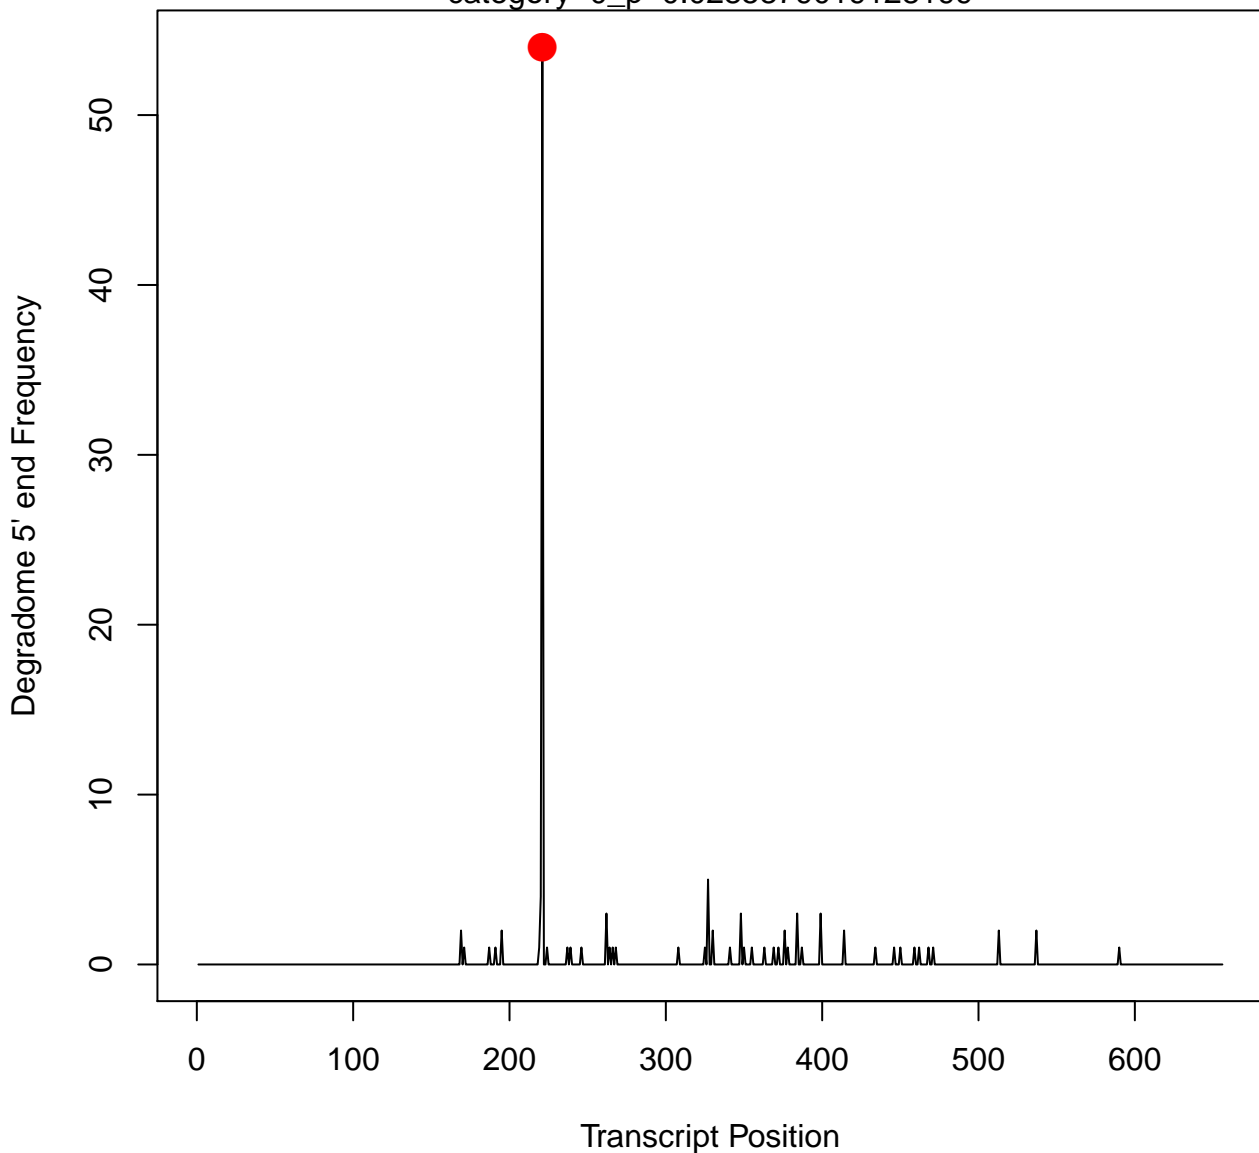

Supplement: s1 [file s1]

**T=Cluster-22970.0\_Q=pma-miR1314\_S=103**

category=0\_p=0.00027358987754178

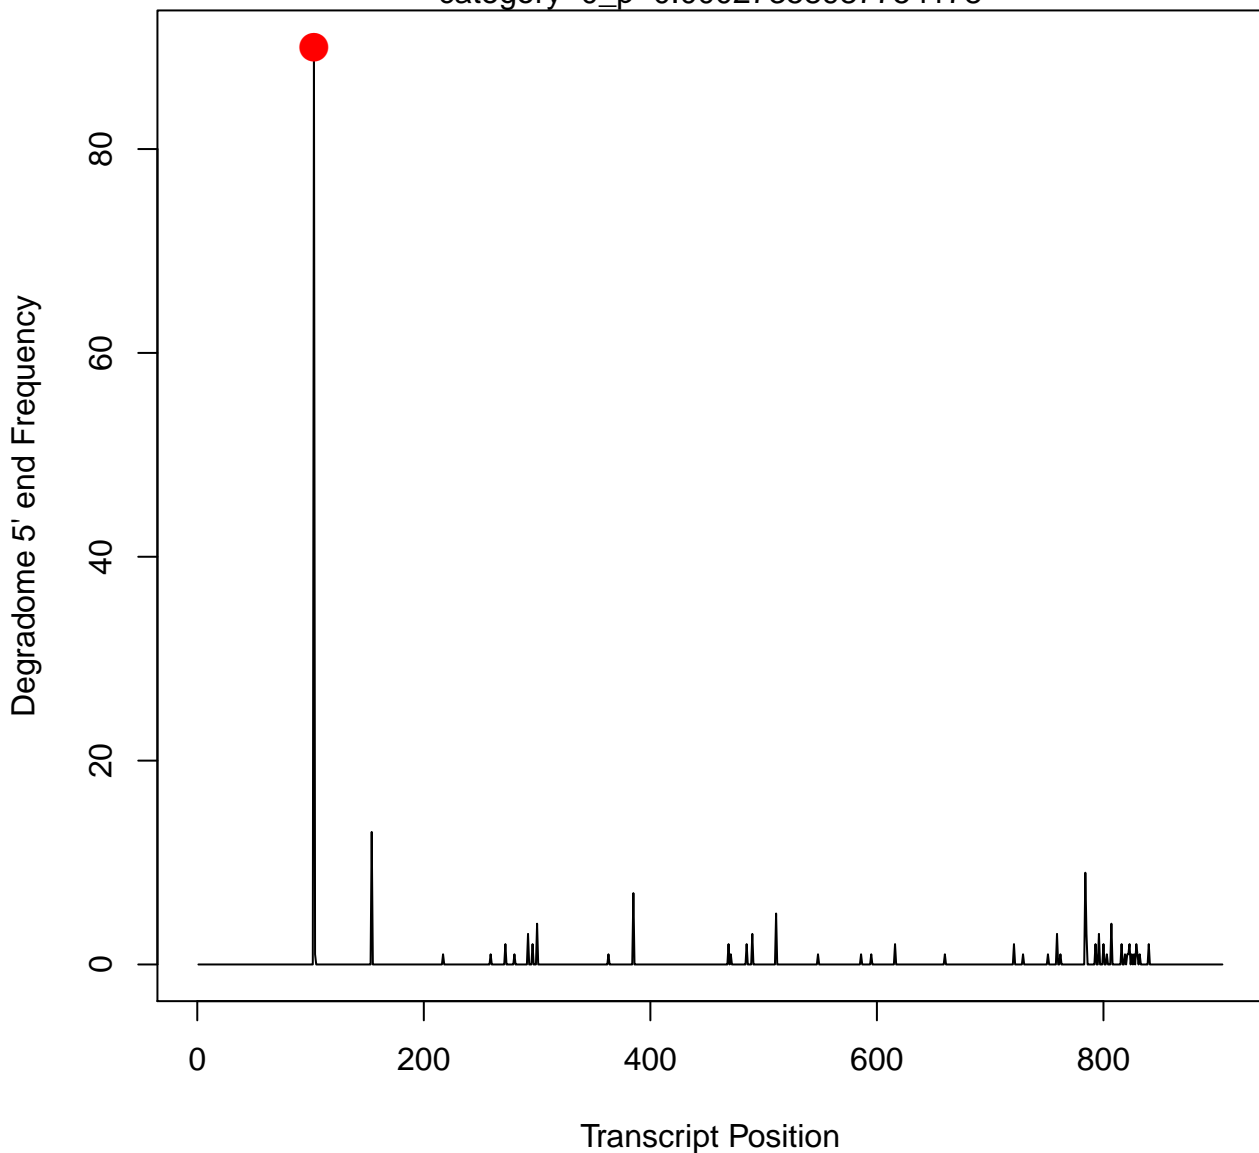

Supplement: s1 [file s1]

**T=Cluster-18410.32926\_Q=pma-miR319\_S=2123**

category=0\_p=0.00382345425486719

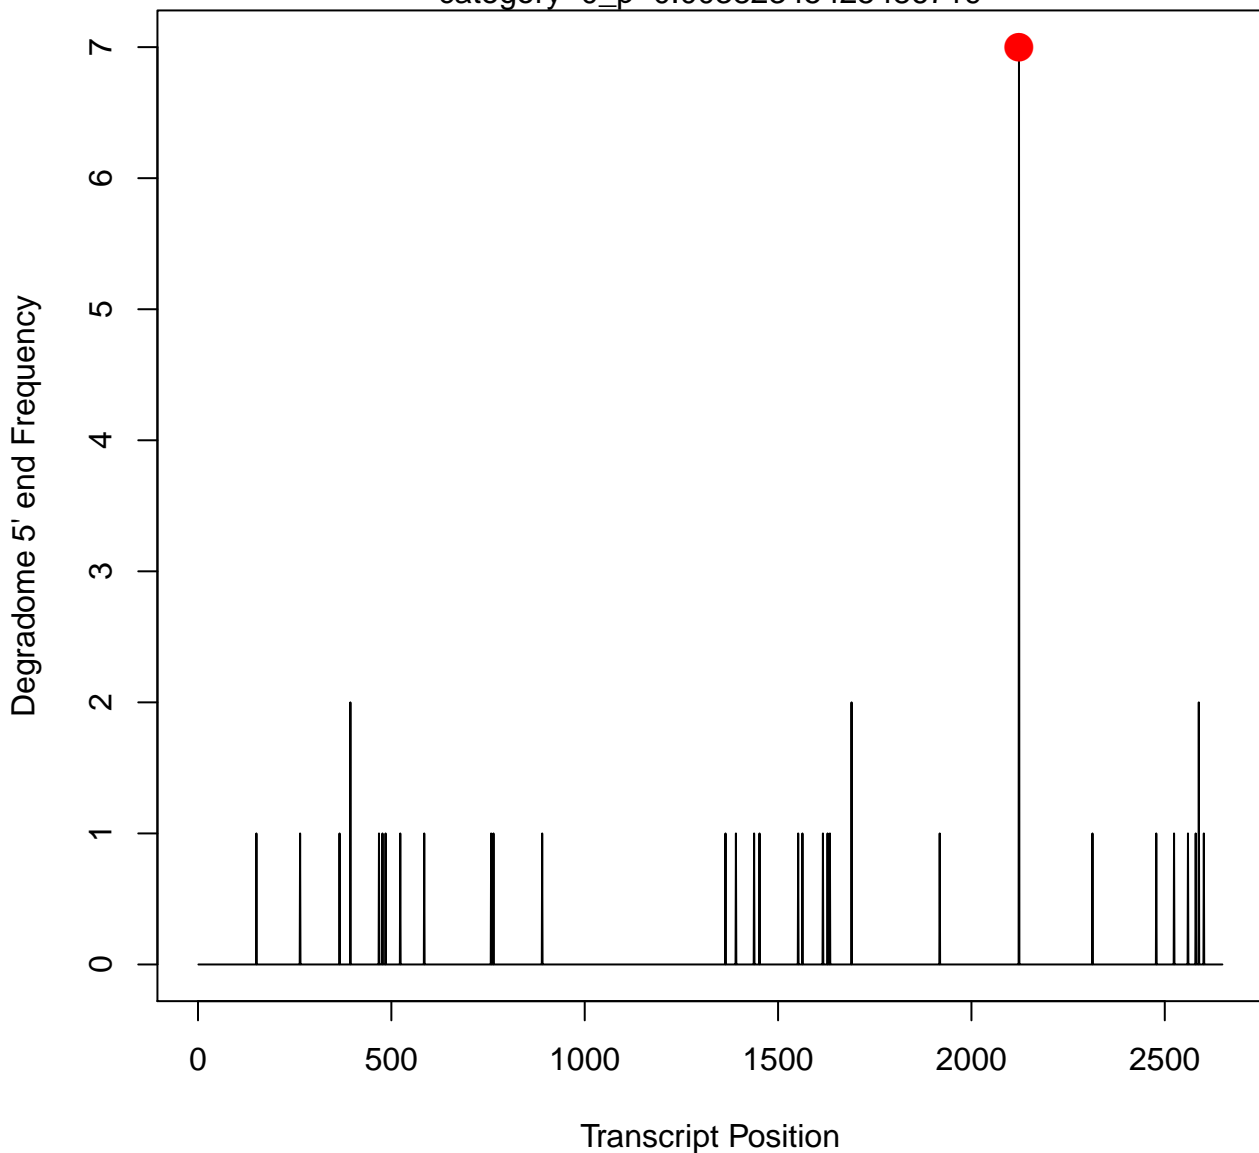

Supplement: s1 [file s1]

**T=Cluster-18410.113971\_Q=novel\_10\_S=1459**

category=0\_p=0.000547104903662499

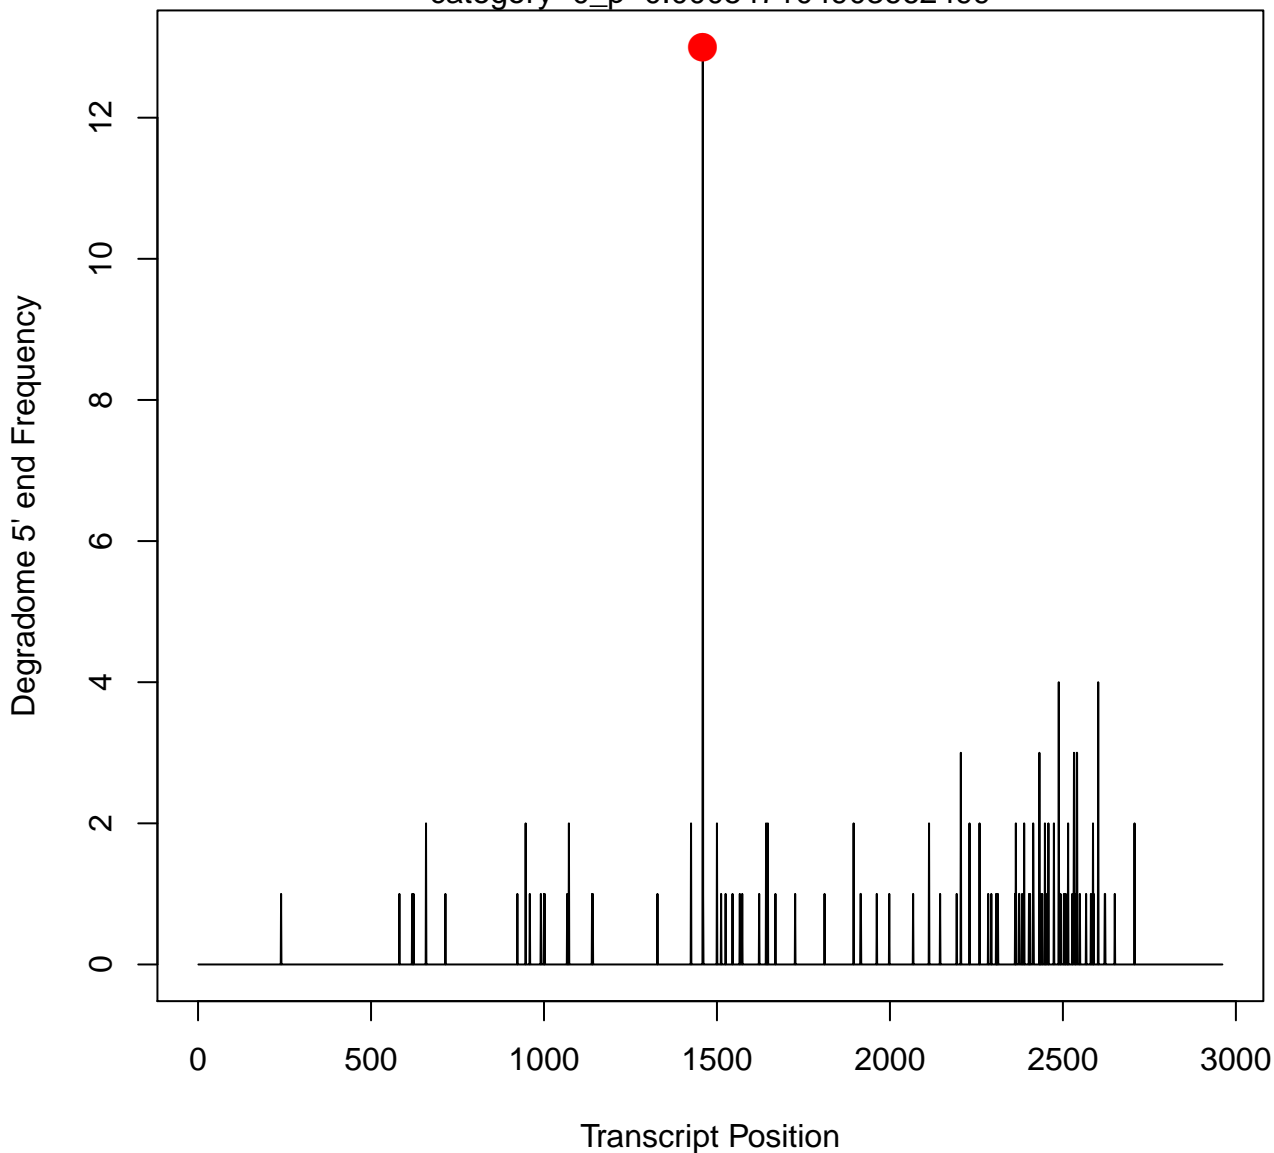

Supplement: s1 [file s1]

**T=Cluster-18410.74460\_Q=novel\_57\_S=802**

category=2\_p=0.0342485307007228

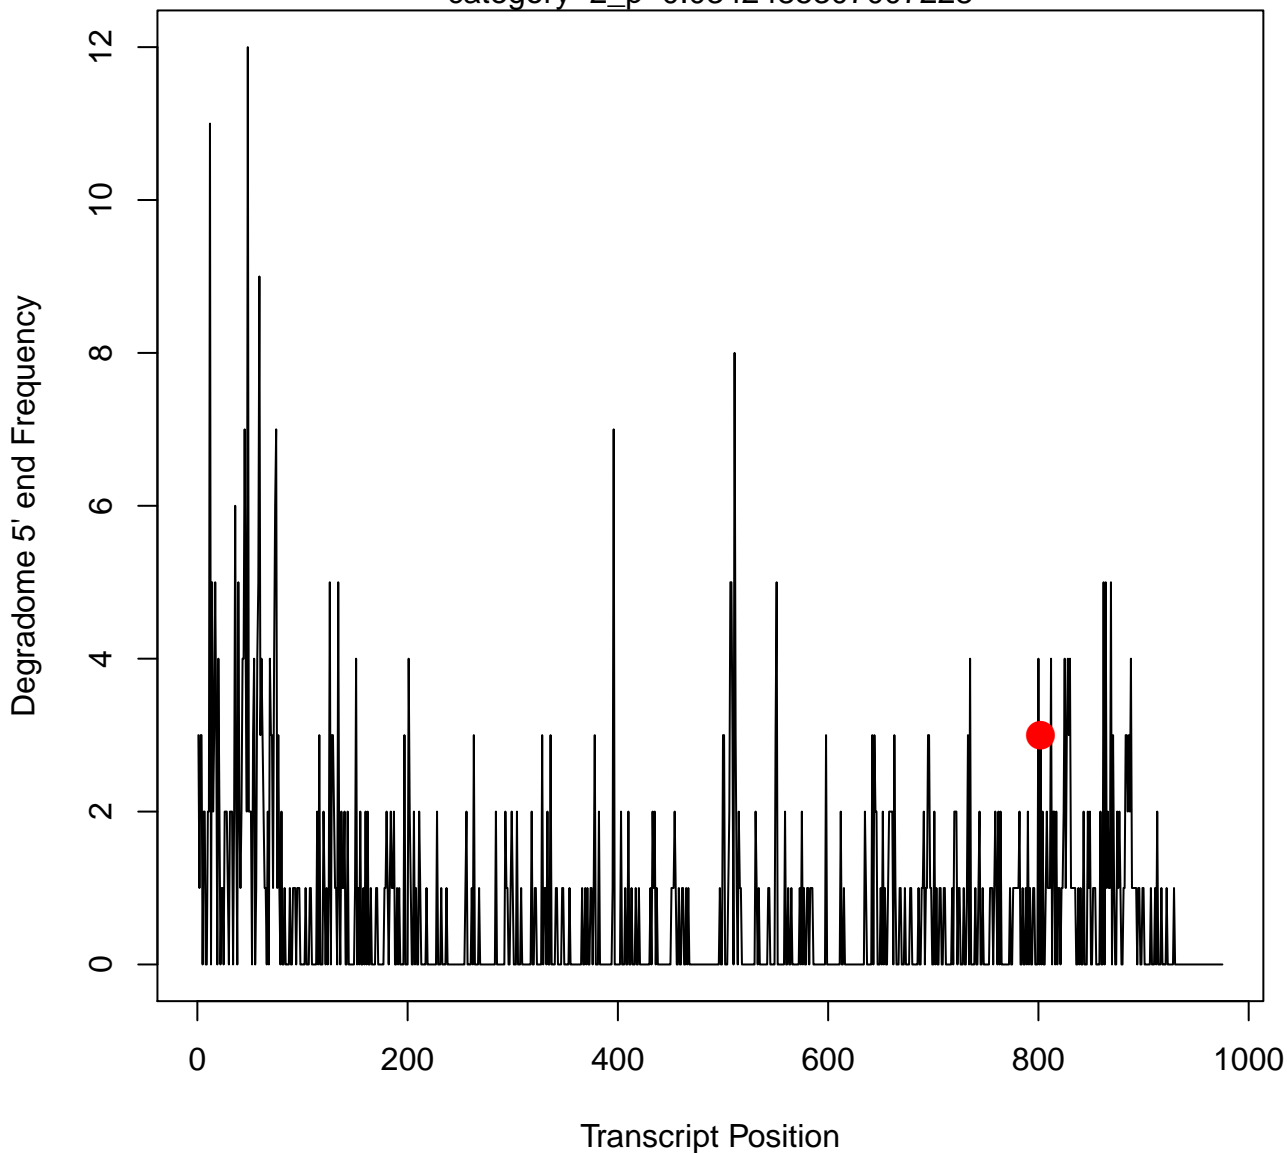

Supplement: s1 [file s1]

**T=Cluster-18410.48839\_Q=novel\_20\_S=1870**

category=0\_p=0.0108854128106712

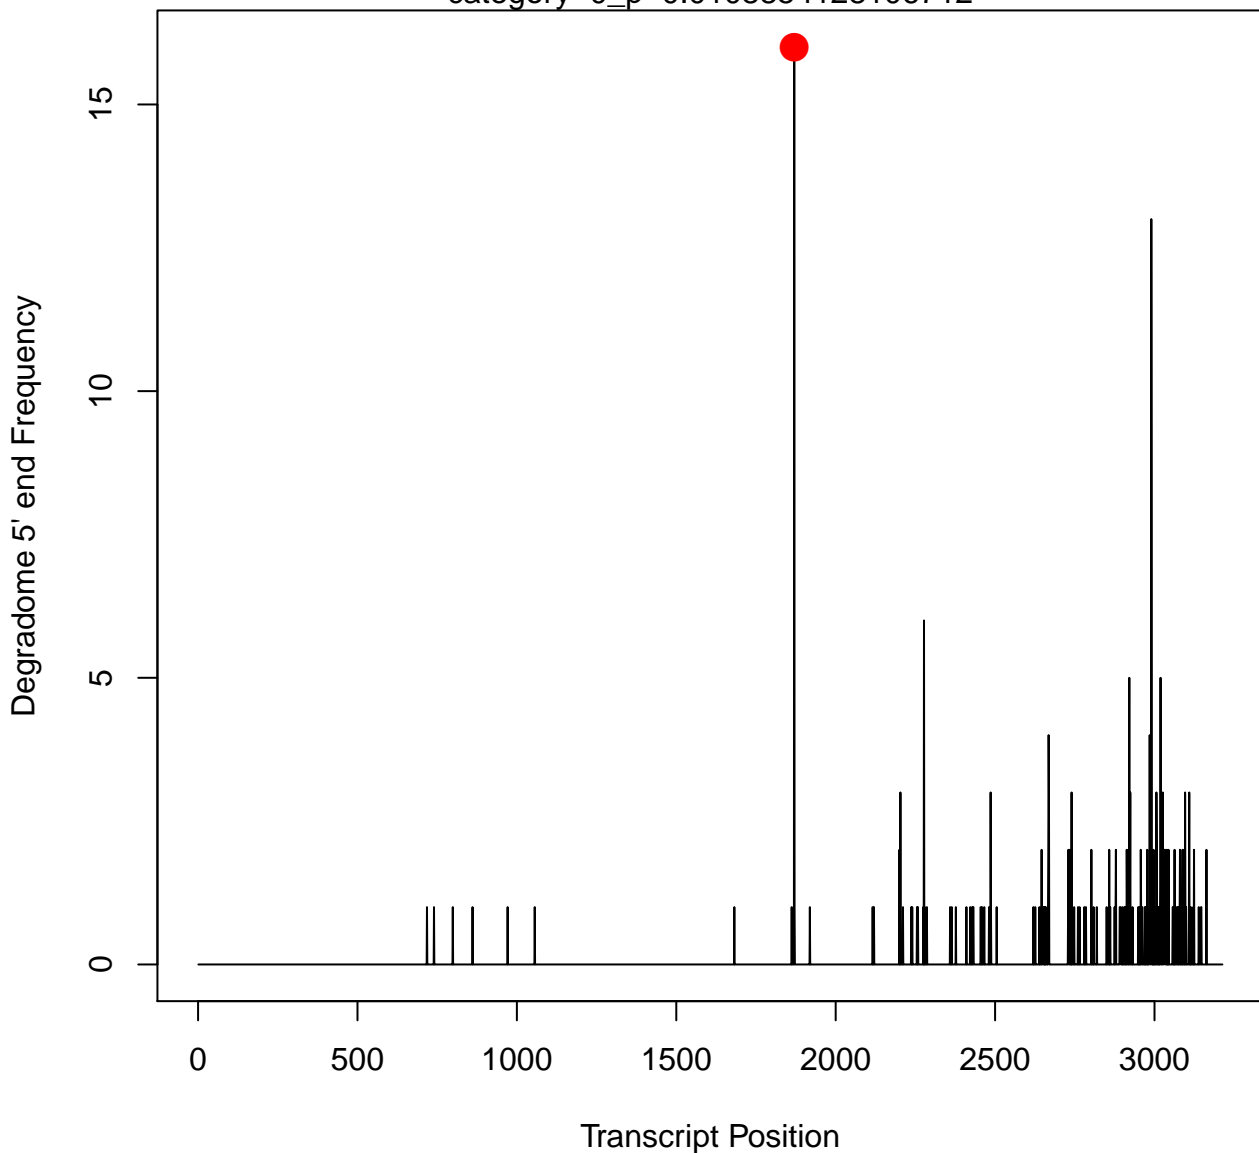

Supplement: s1 [file s1]

**T=Cluster-18410.62598\_Q=pma-miR482a\_S=129**

category=0\_p=0.0767905752939306

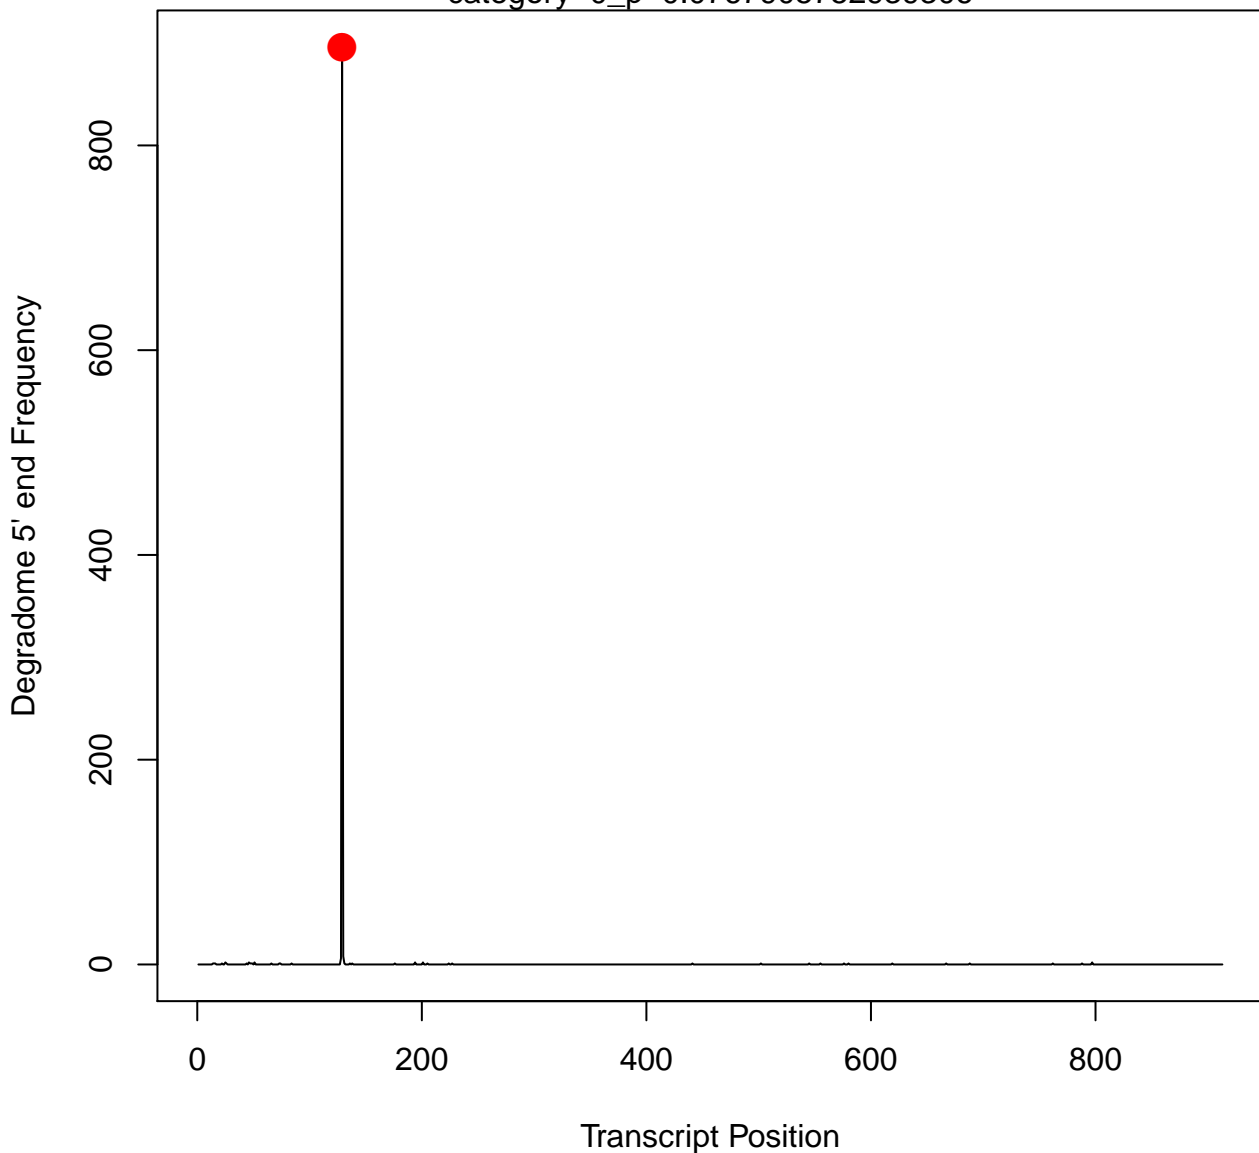

Supplement: s1 [file s1]

**T=Cluster-18410.90308\_Q=novel\_159\_S=1112**

category=1\_p=0.00962404346442303

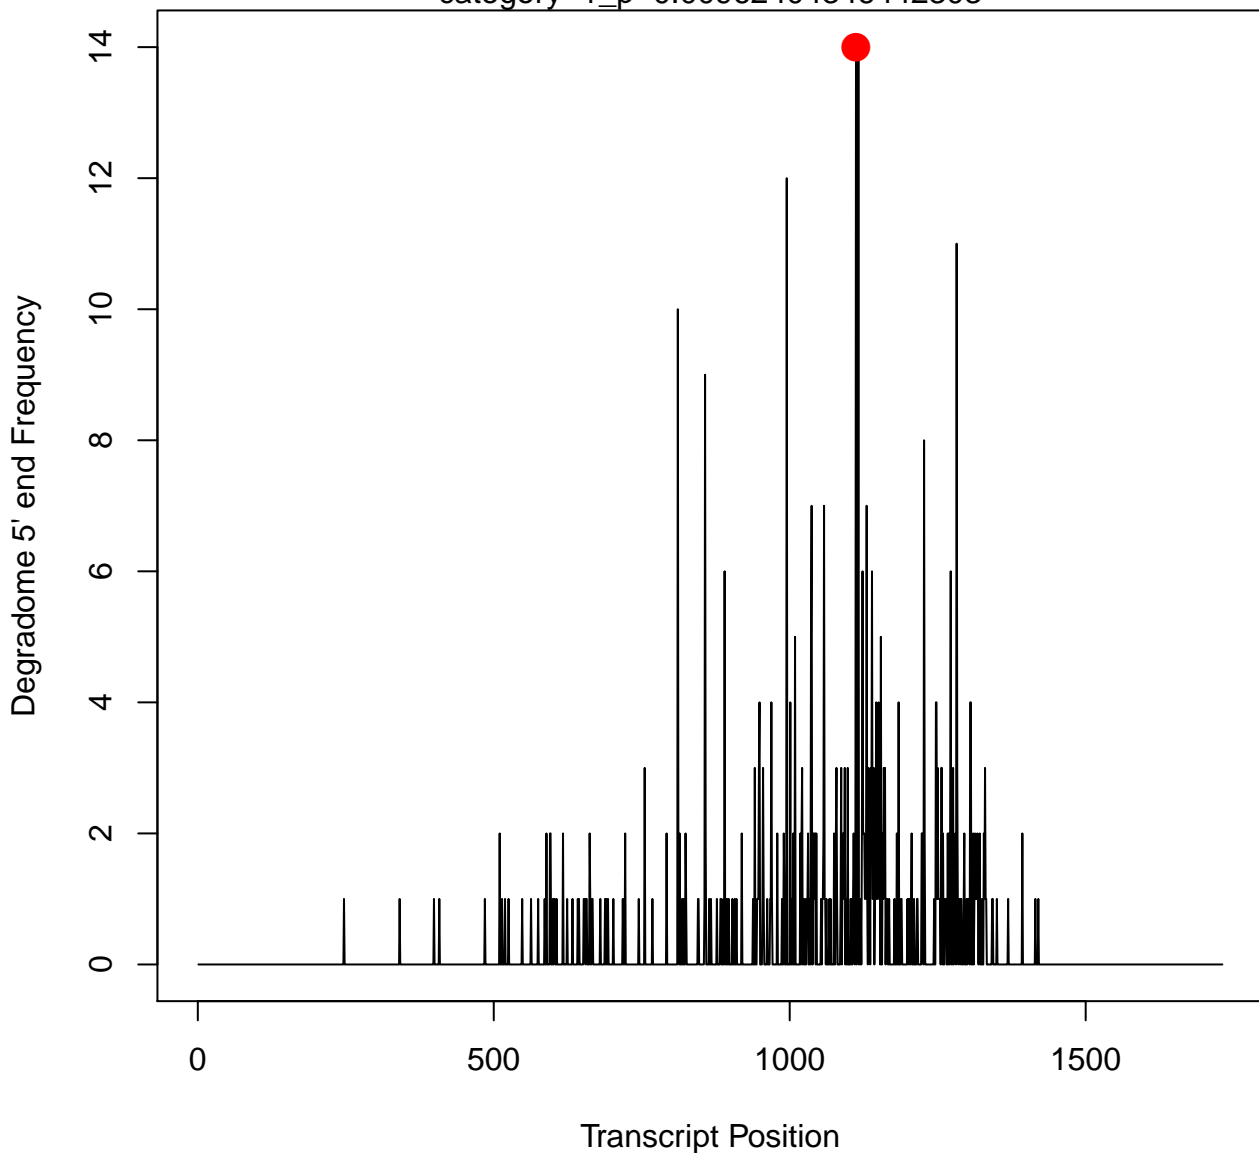

Supplement: s1 [file s1]

**T=Cluster-18410.48562\_Q=pma-miR482a\_S=385**

category=0\_p=0.00300537520191857

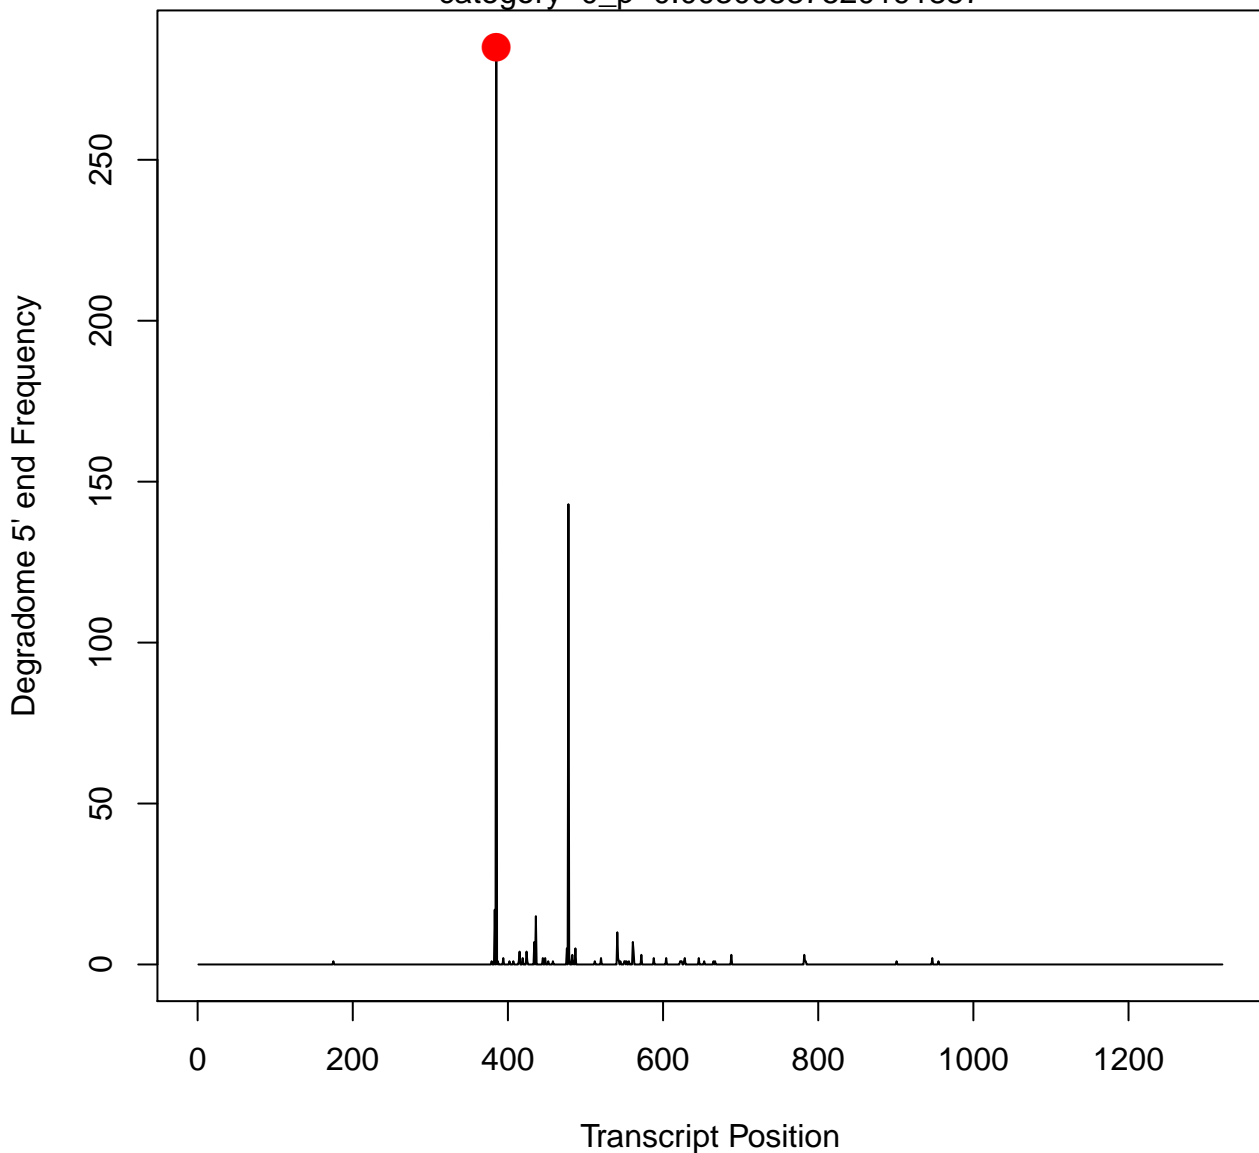

Supplement: s1 [file s1]

**T=Cluster-18410.37626\_Q=novel\_148\_S=270**

category=4\_p=0.0942809831727407

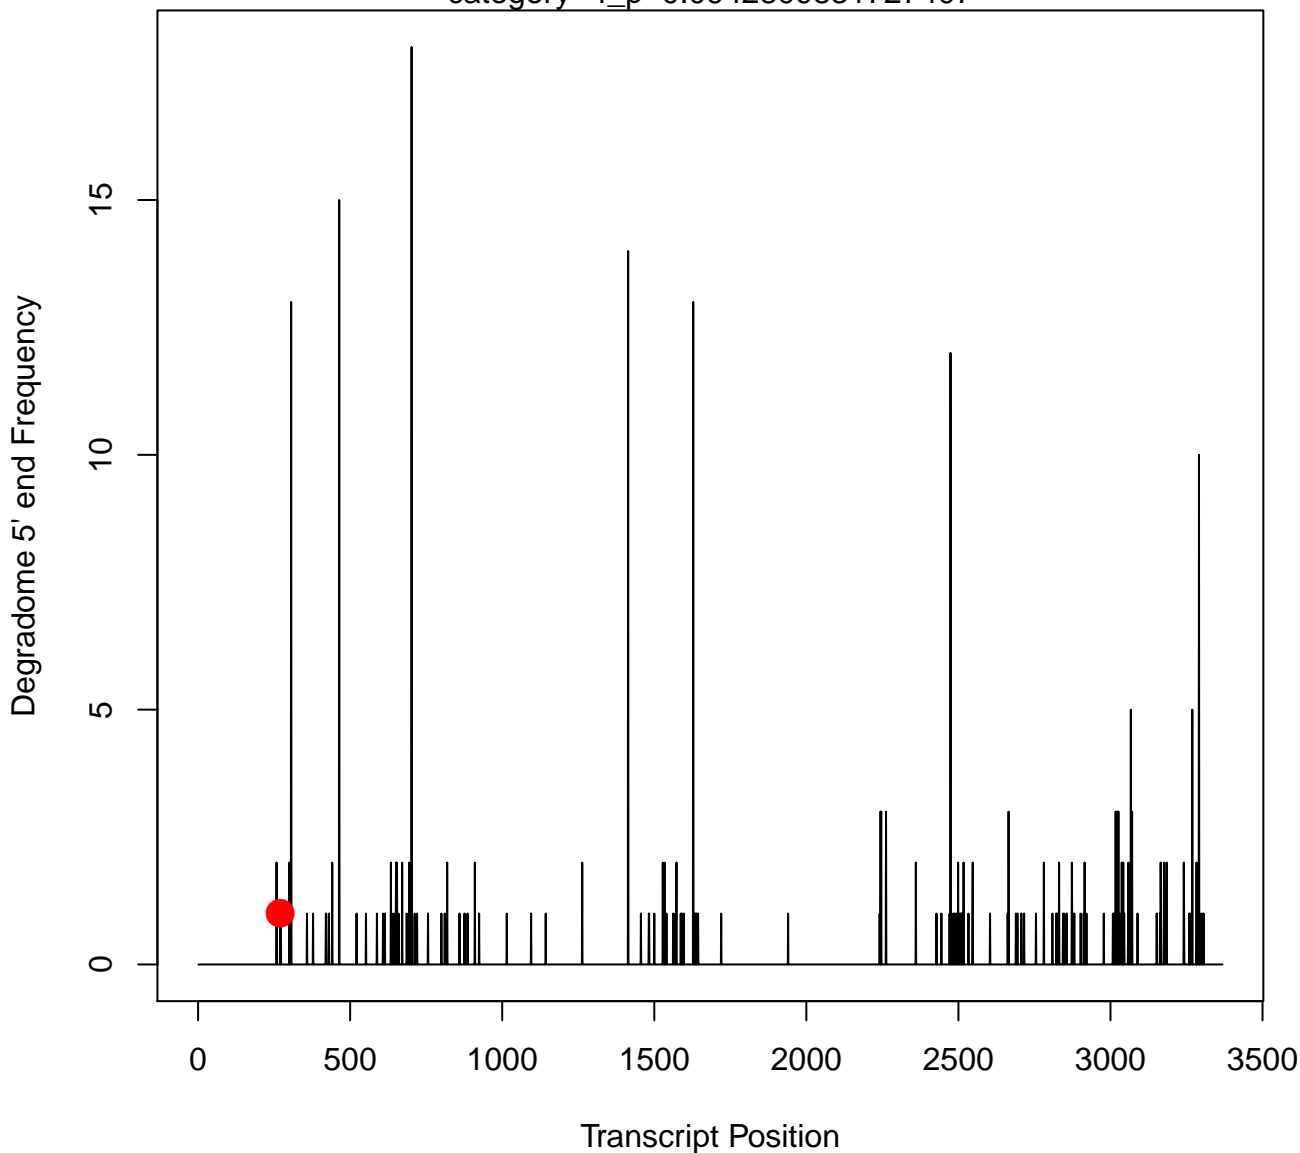

Supplement: s1 [file s1]

**T=Cluster-18410.32169\_Q=pma-miR319\_S=115**

category=0\_p=0.0108854128106712

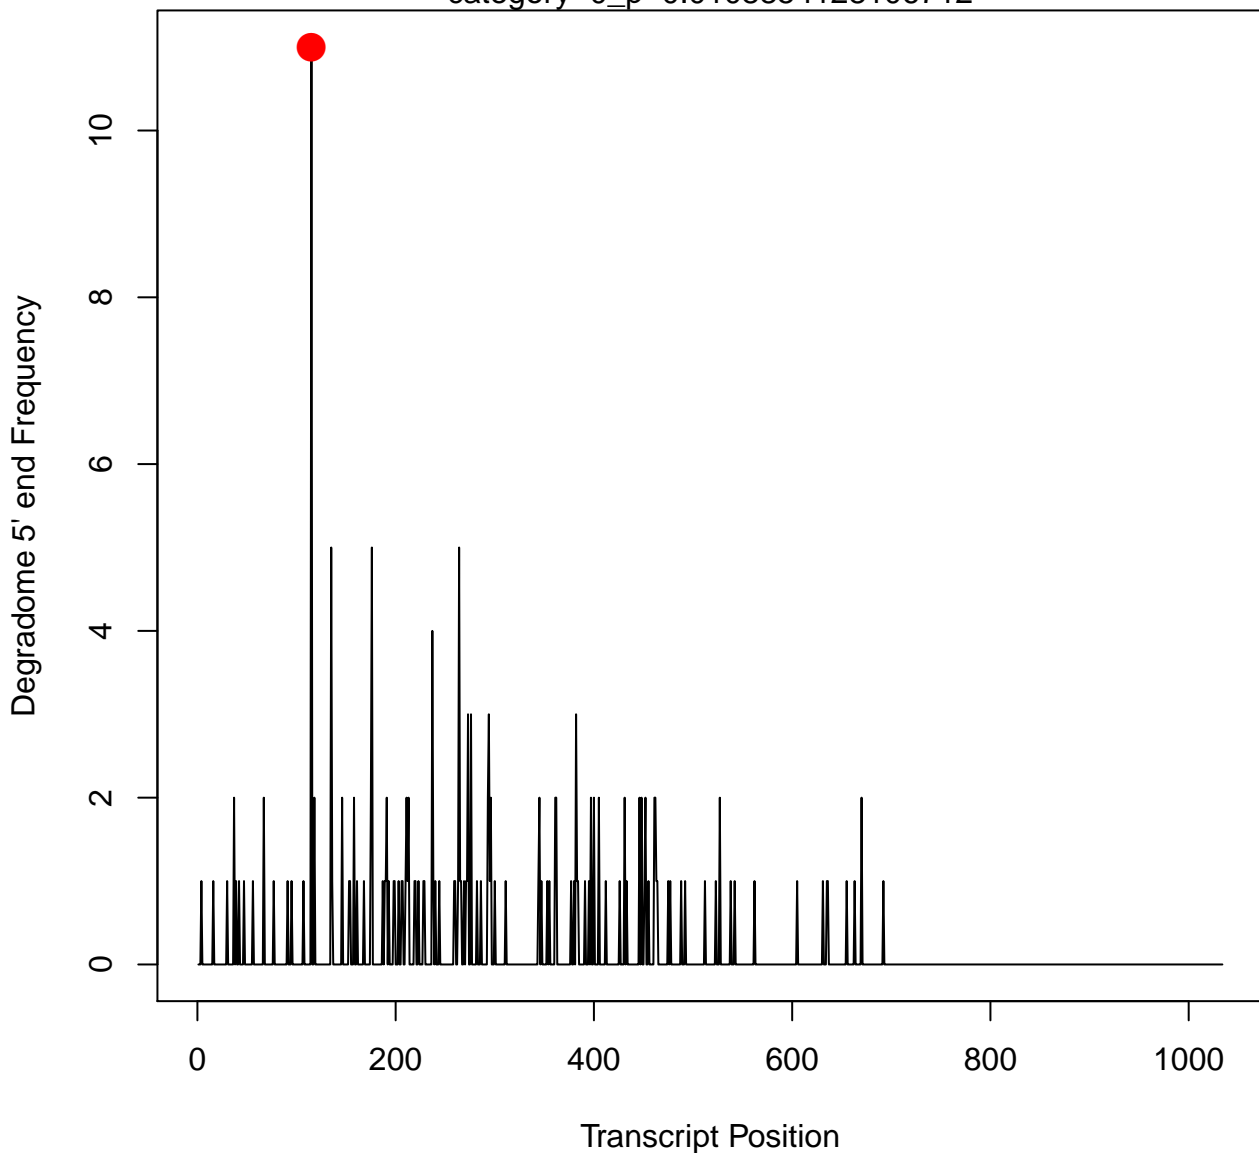

Supplement: s1 [file s1]

**T=Cluster-18410.42912\_Q=novel\_66\_S=833**

category=0\_p=0.00382345425486719

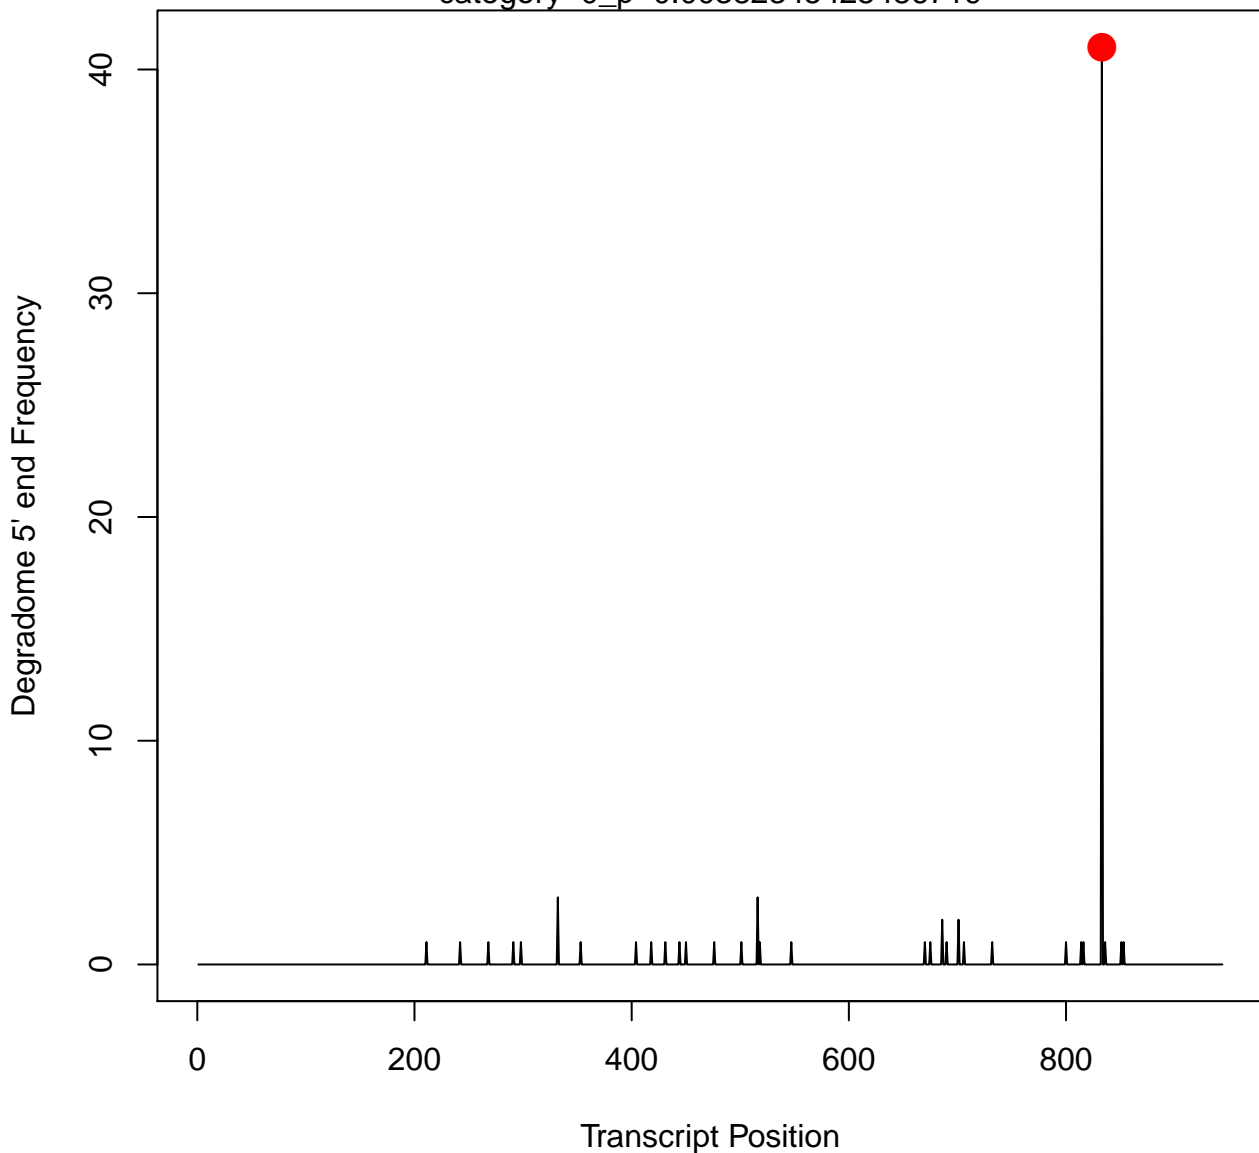

Supplement: s1 [file s1]

**T=Cluster-21701.0\_Q=novel\_14\_S=1121**

category=4\_p=0.0942809831727407

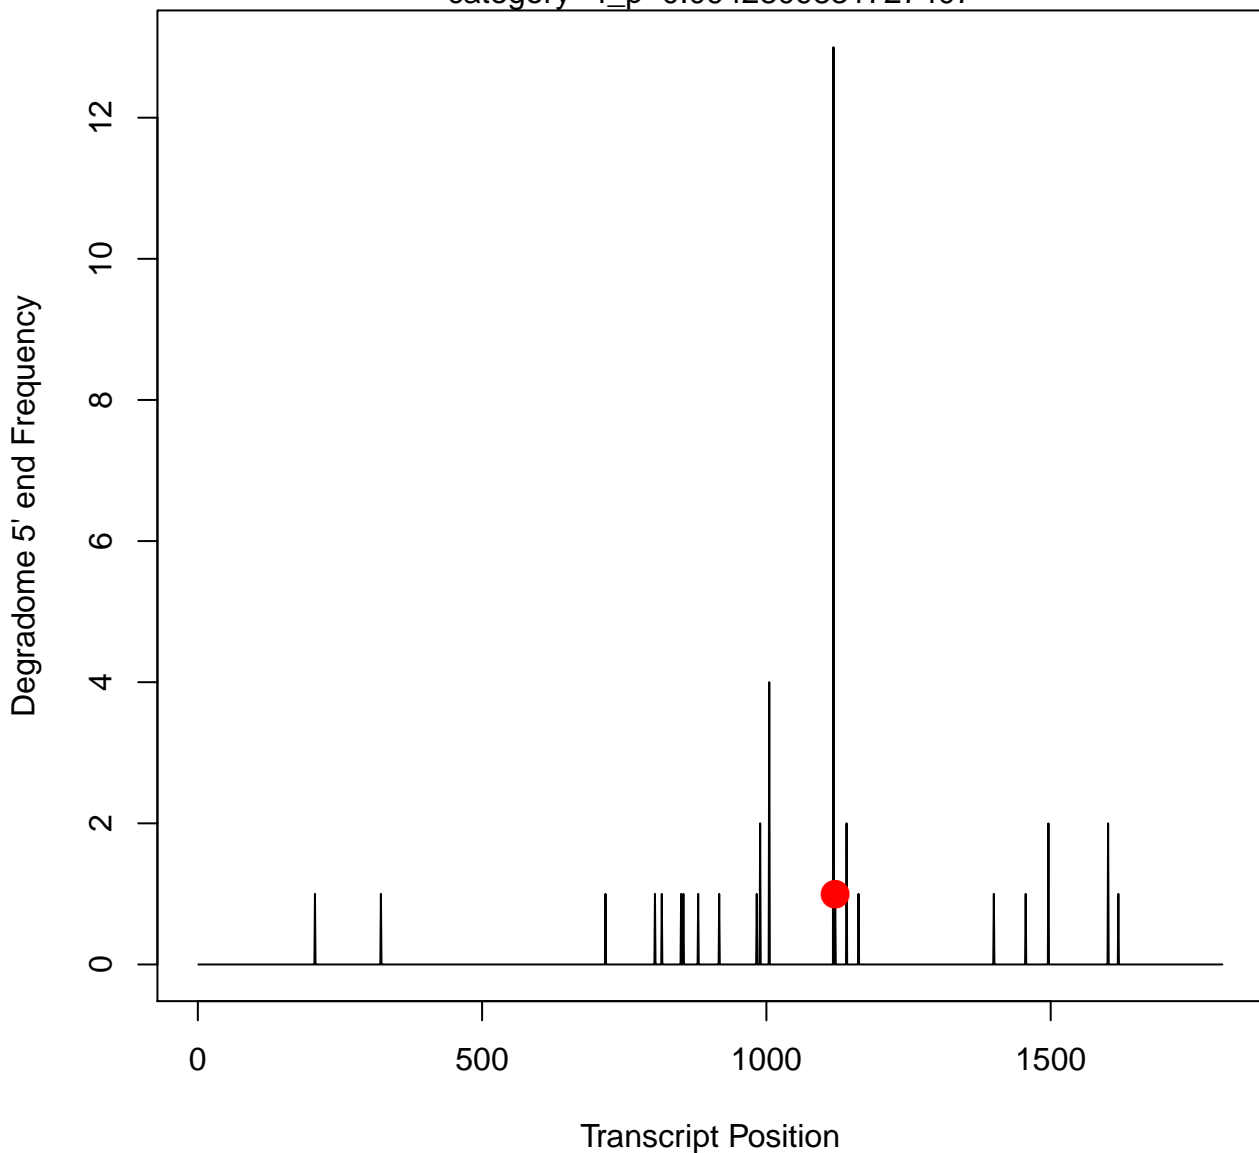

Supplement: s1 [file s1]

**T=Cluster-18410.61118\_Q=novel\_198\_S=738**

category=1\_p=0.0941578673898755

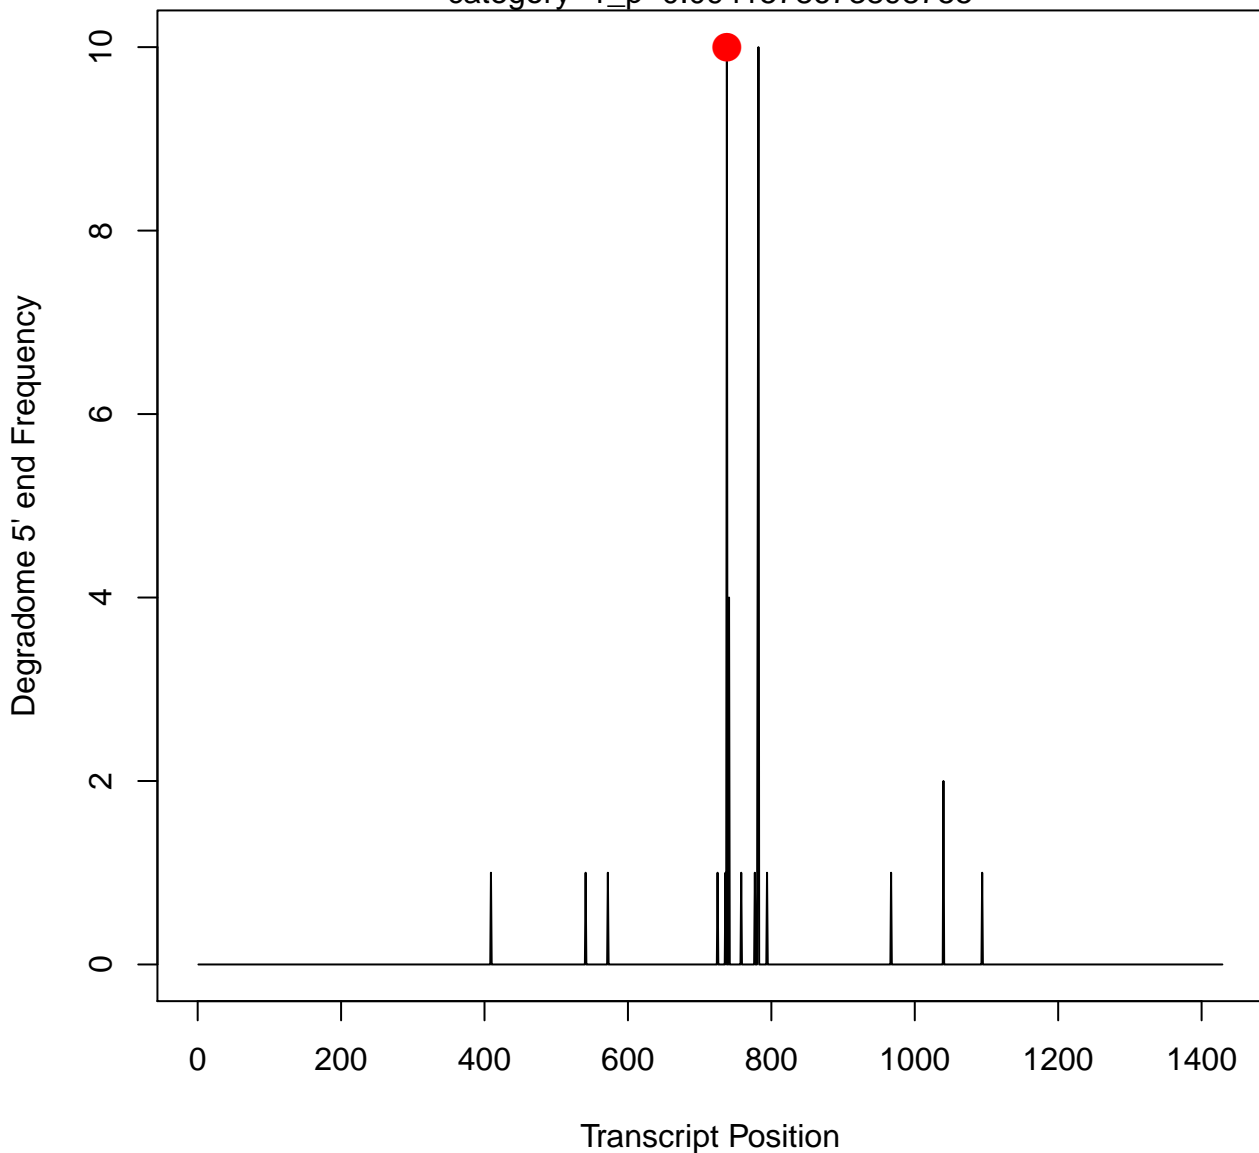

Supplement: s1 [file s1]

**T=Cluster-18410.53748\_Q=novel\_117\_S=133**

category=0\_p=0.00164041690342198

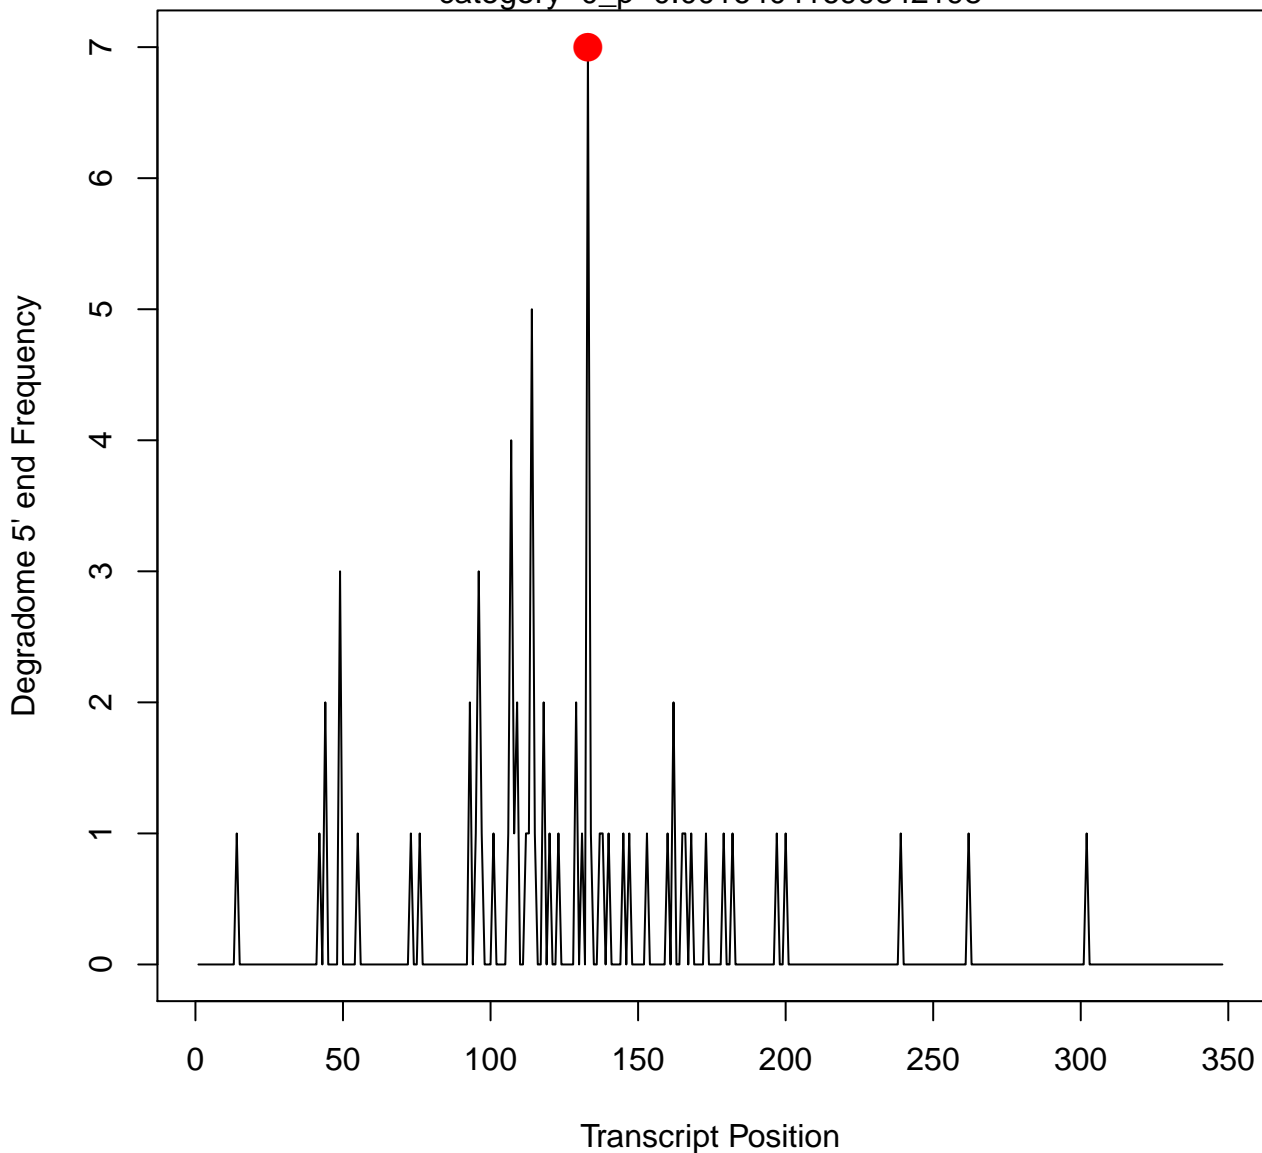

Supplement: s1 [file s1]

**T=Cluster-17867.1\_Q=novel\_47\_S=1097**

category=0\_p=0.000820545098840553

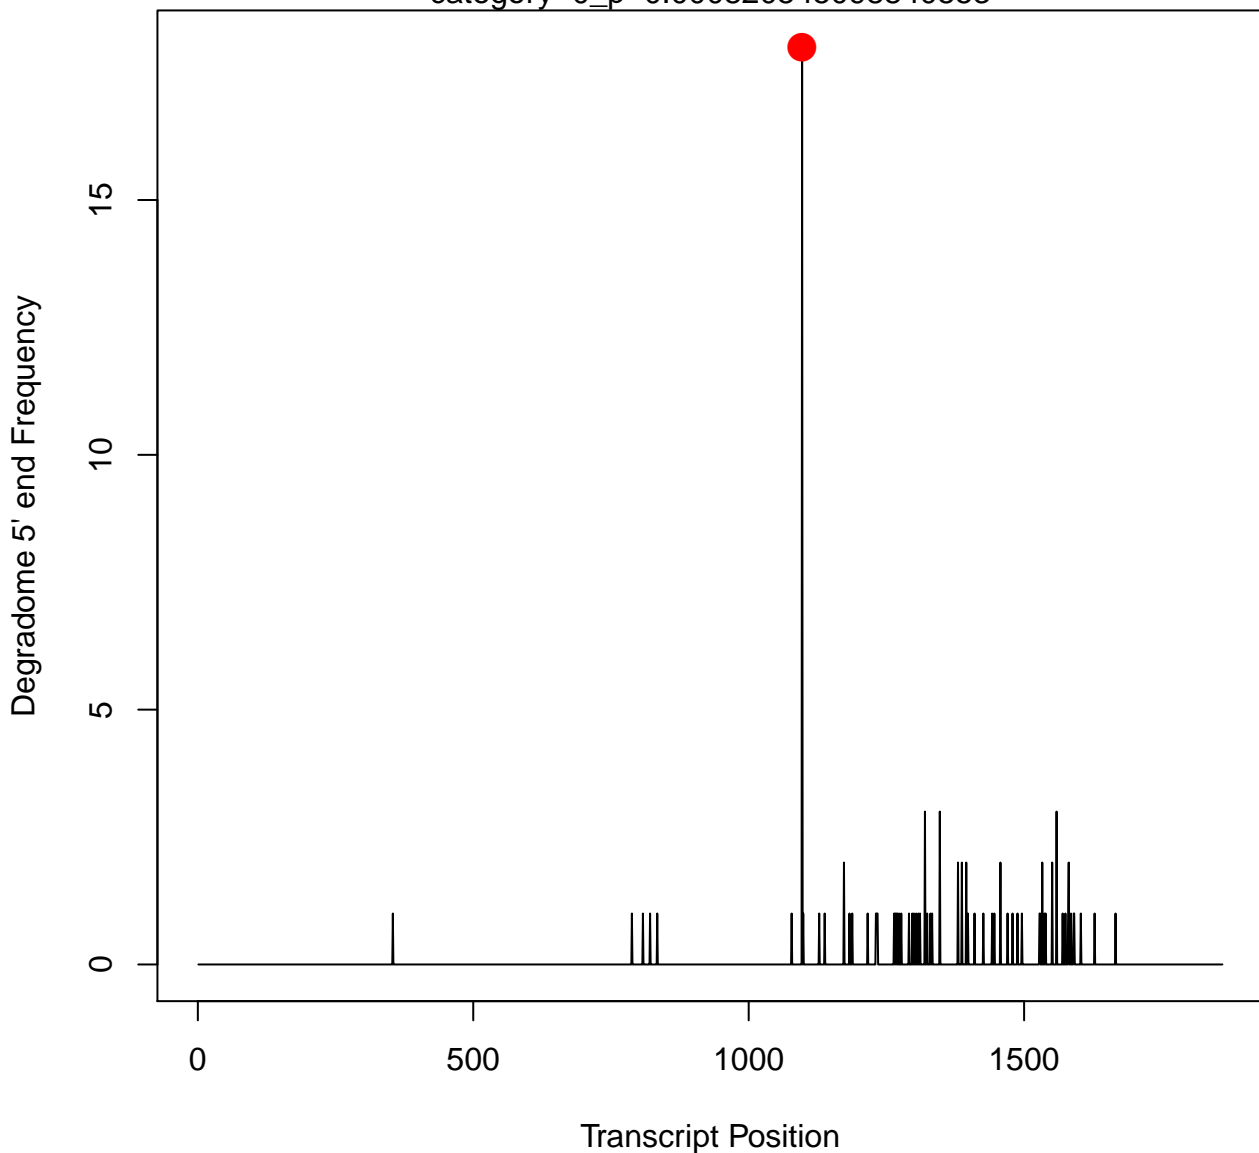

Supplement: s1 [file s1]

**T=Cluster-18410.82084\_Q=novel\_14\_S=151**

category=0\_p=0.0410007425951553

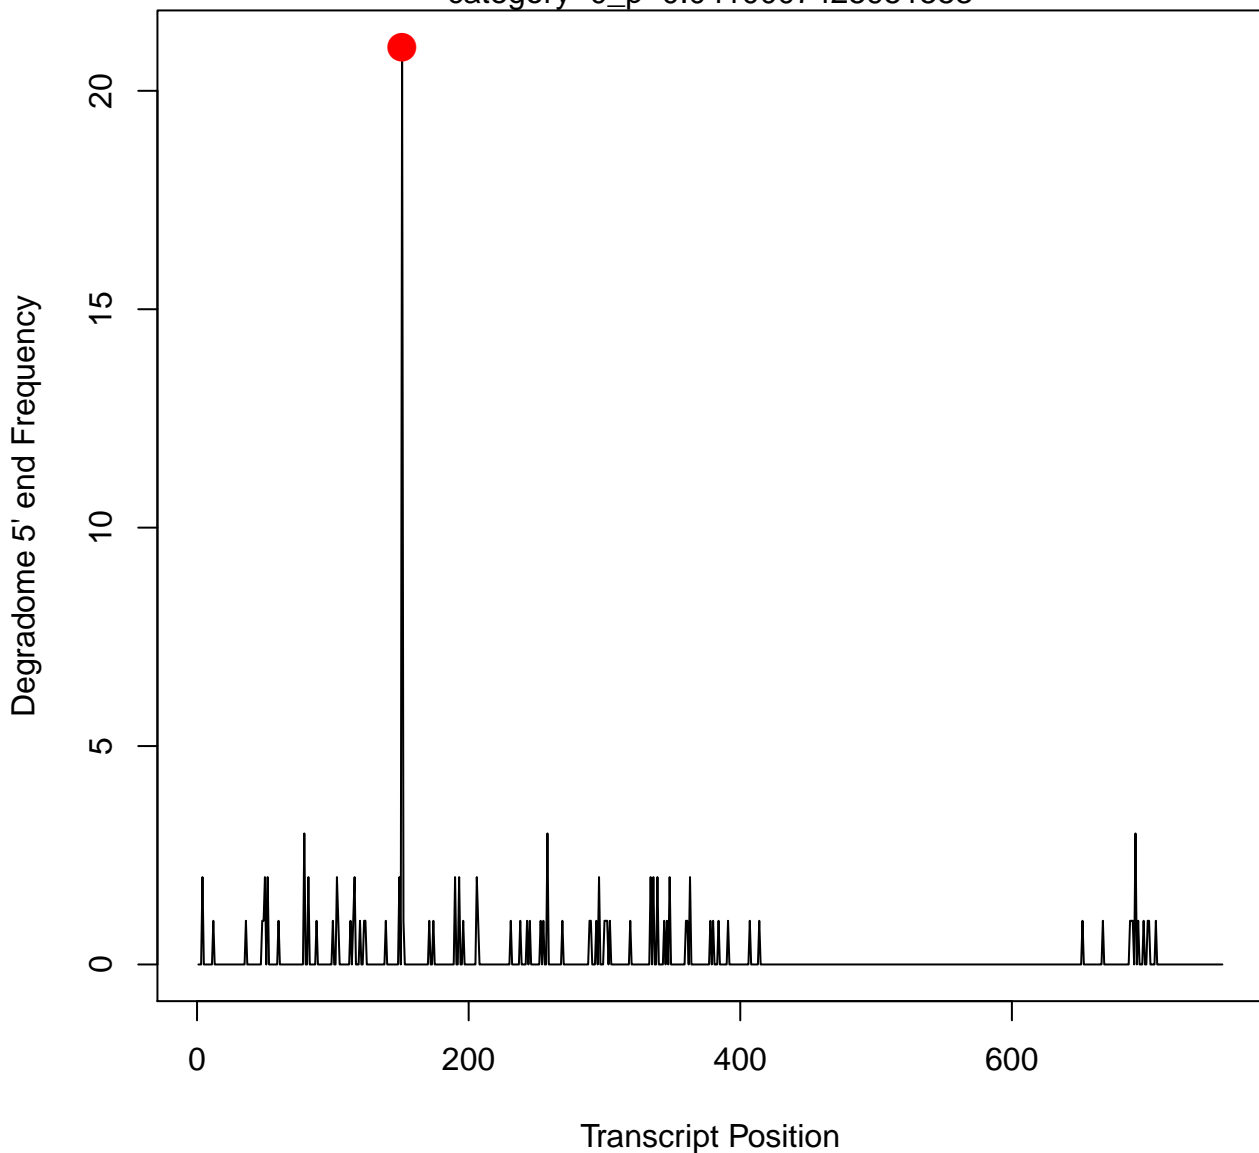

Supplement: s1 [file s1]

**T=Cluster-6417.0\_Q=pma-miR946a-3p\_S=399**

category=0\_p=0.00327814283922701

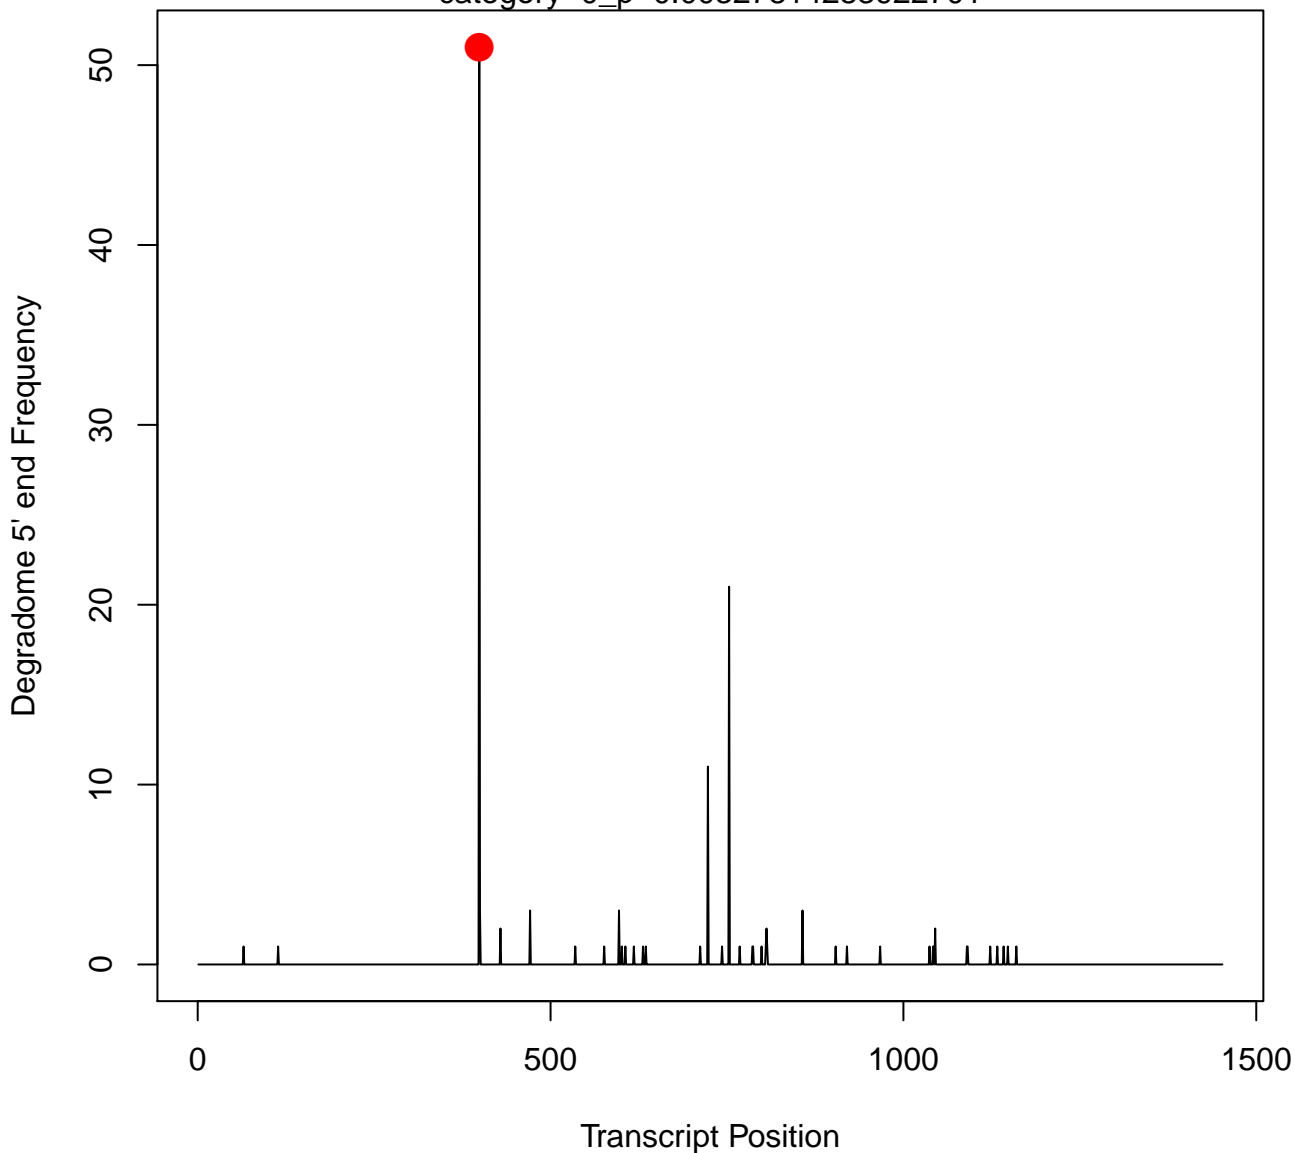

Supplement: s1 [file s1]

**T=Cluster-18410.96644\_Q=novel\_47\_S=407**

category=3\_p=0.093081058041071

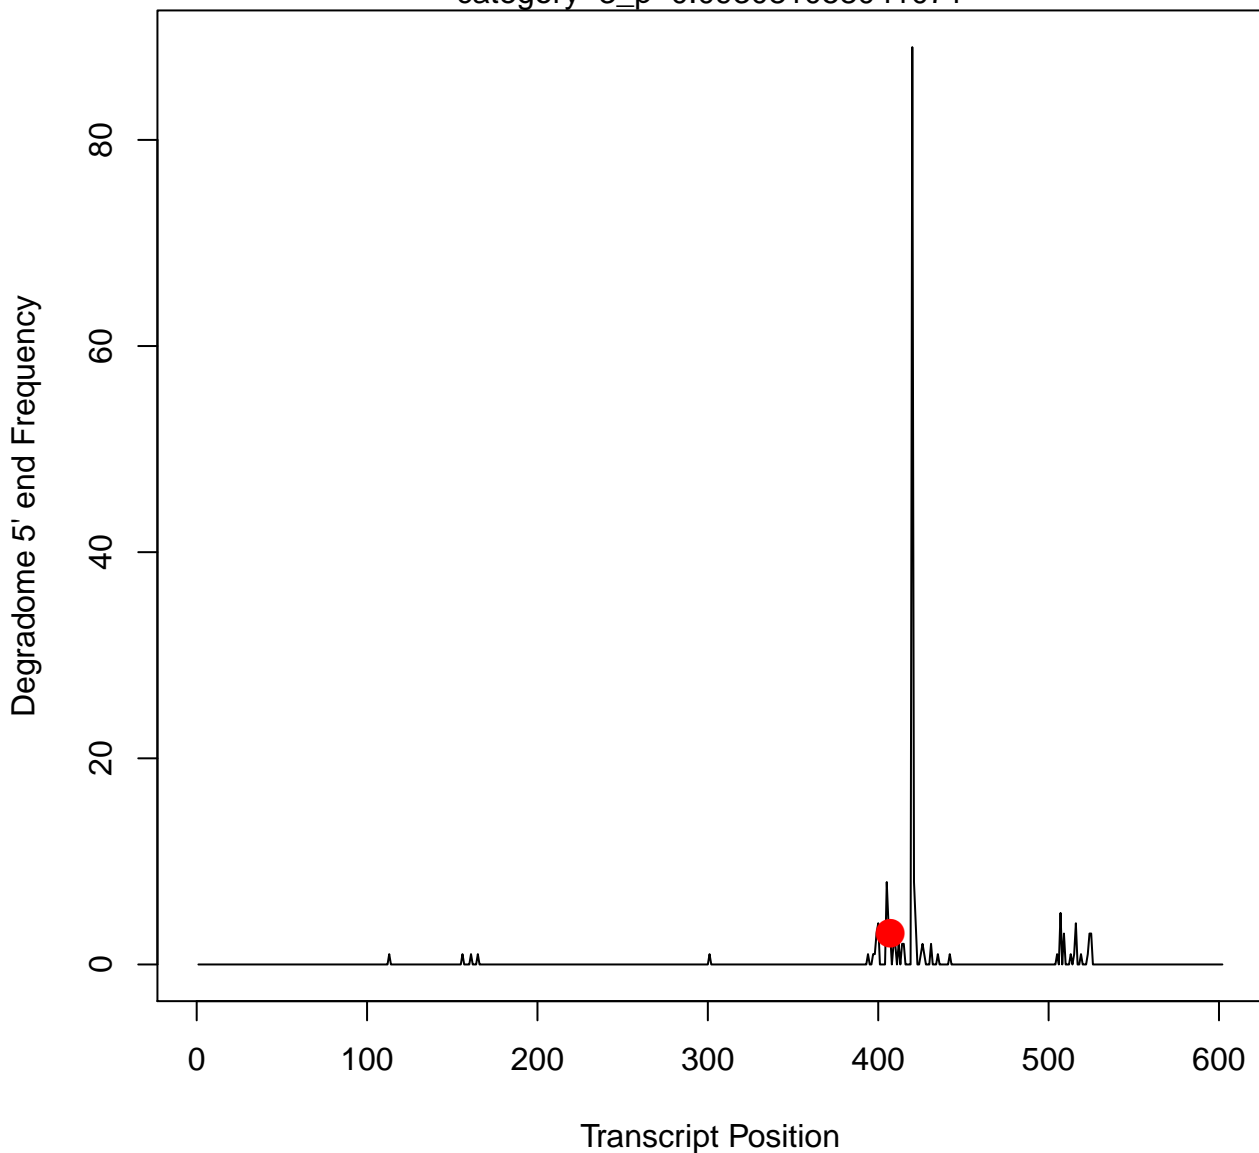

Supplement: s1 [file s1]

**T=Cluster-18410.42515\_Q=novel\_42\_S=1392**

category=0\_p=0.00191355797950399

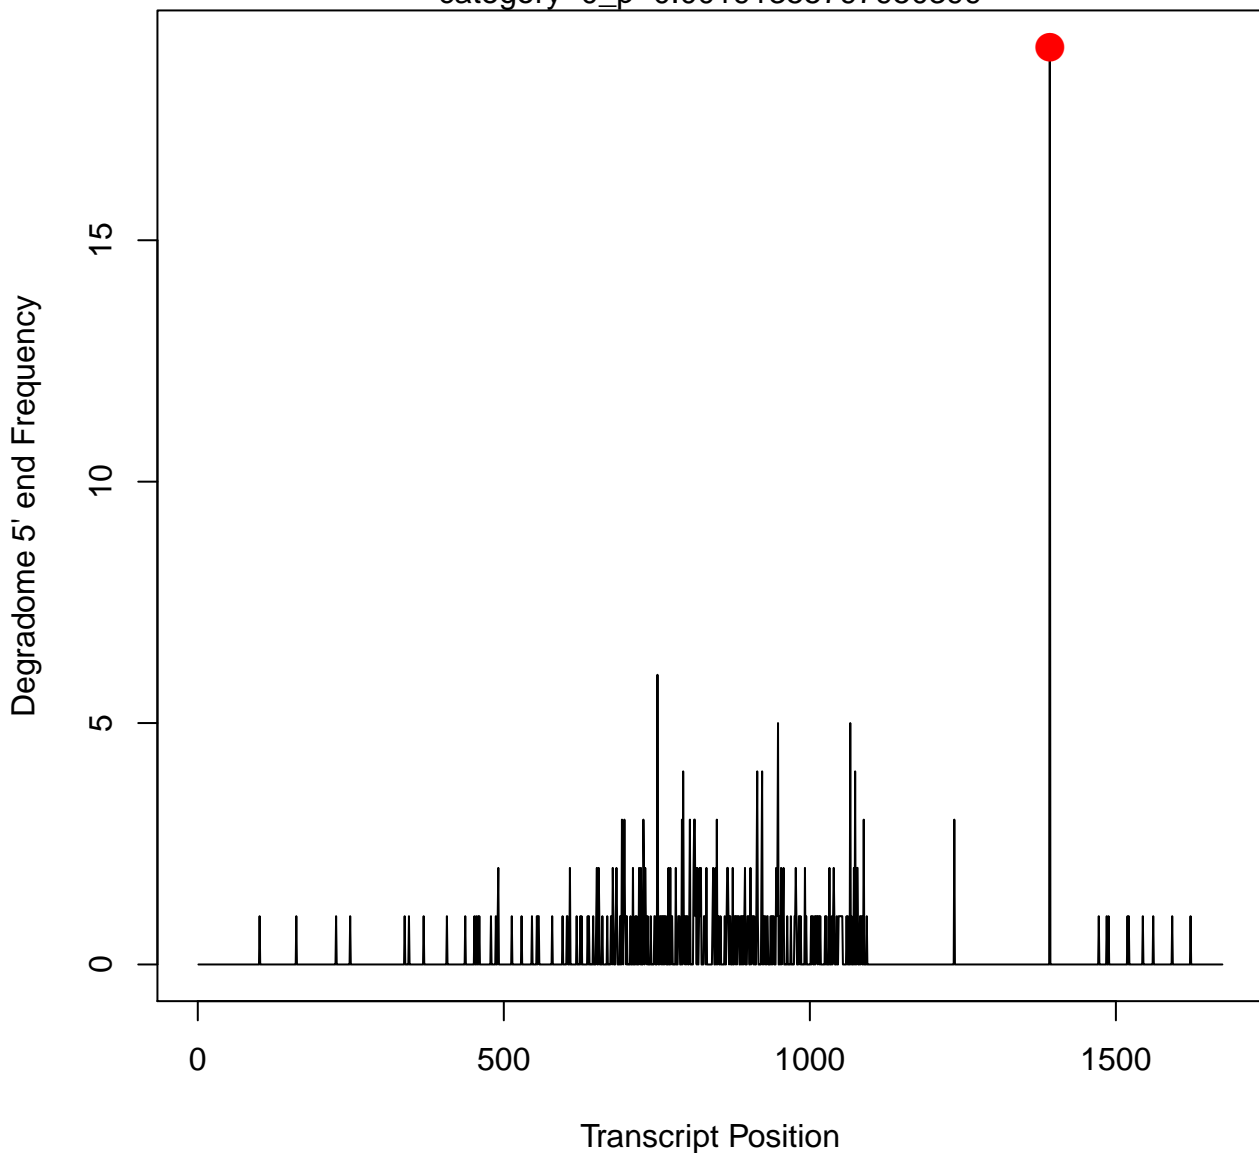

Supplement: s1 [file s1]

**T=Cluster-18410.106677\_Q=pma-miR951\_S=115**

category=0\_p=0.0133182548417358

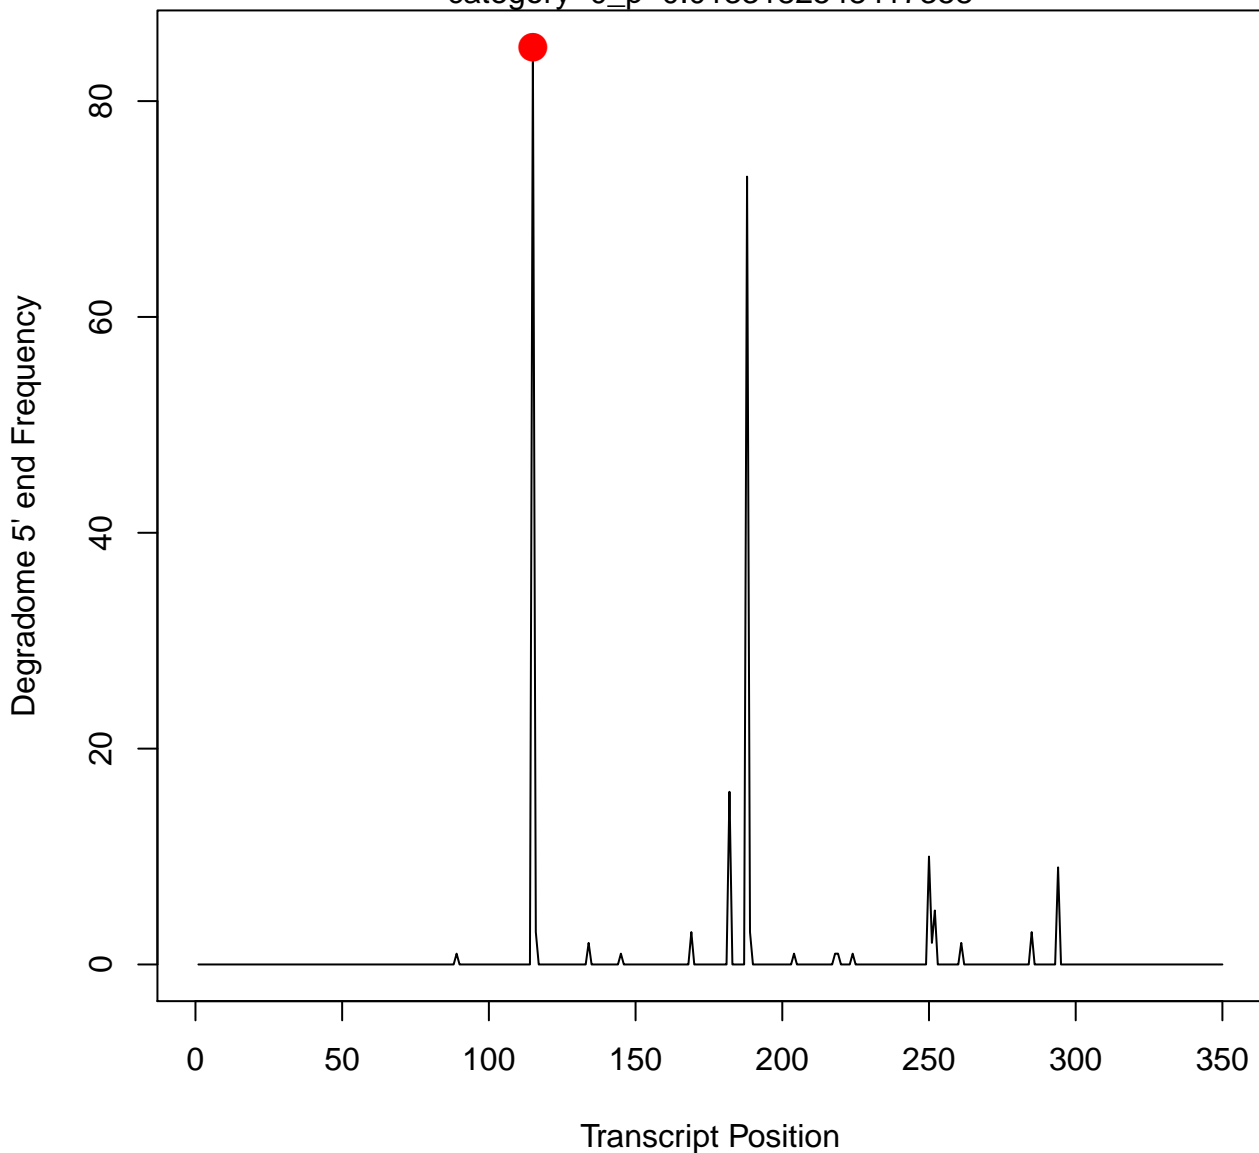

Supplement: s1 [file s1]

**T=Cluster-18410.25718\_Q=novel\_15\_S=321**

category=0\_p=0.00109391048354923

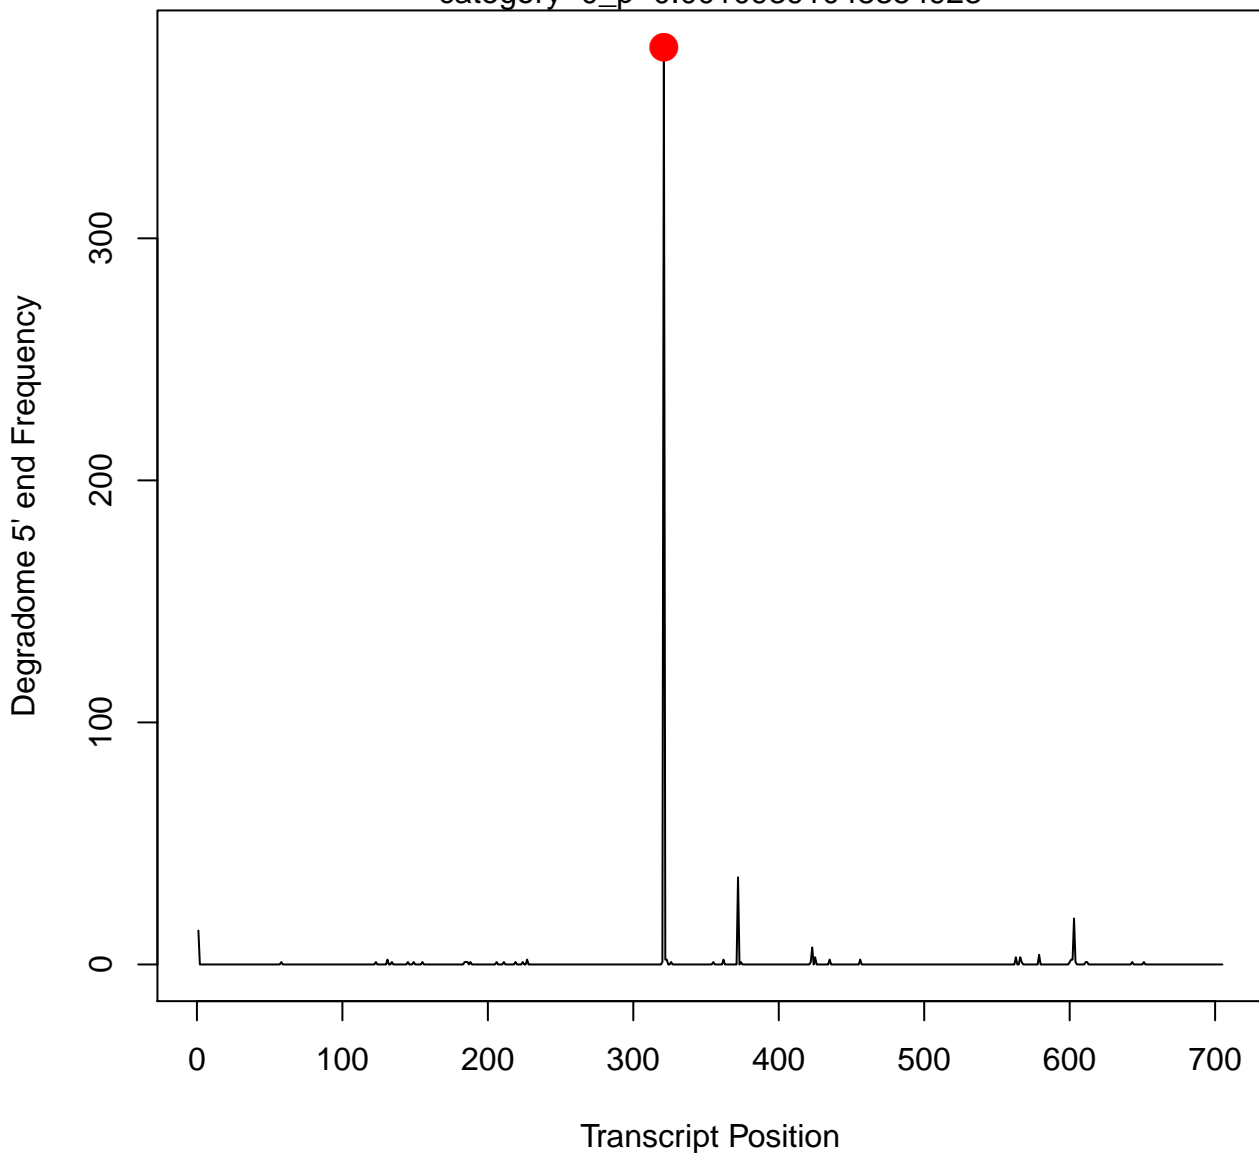

Supplement: s1 [file s1]

**T=Cluster-18410.33767\_Q=novel\_197\_S=480**

category=0\_p=0.00355083585007077

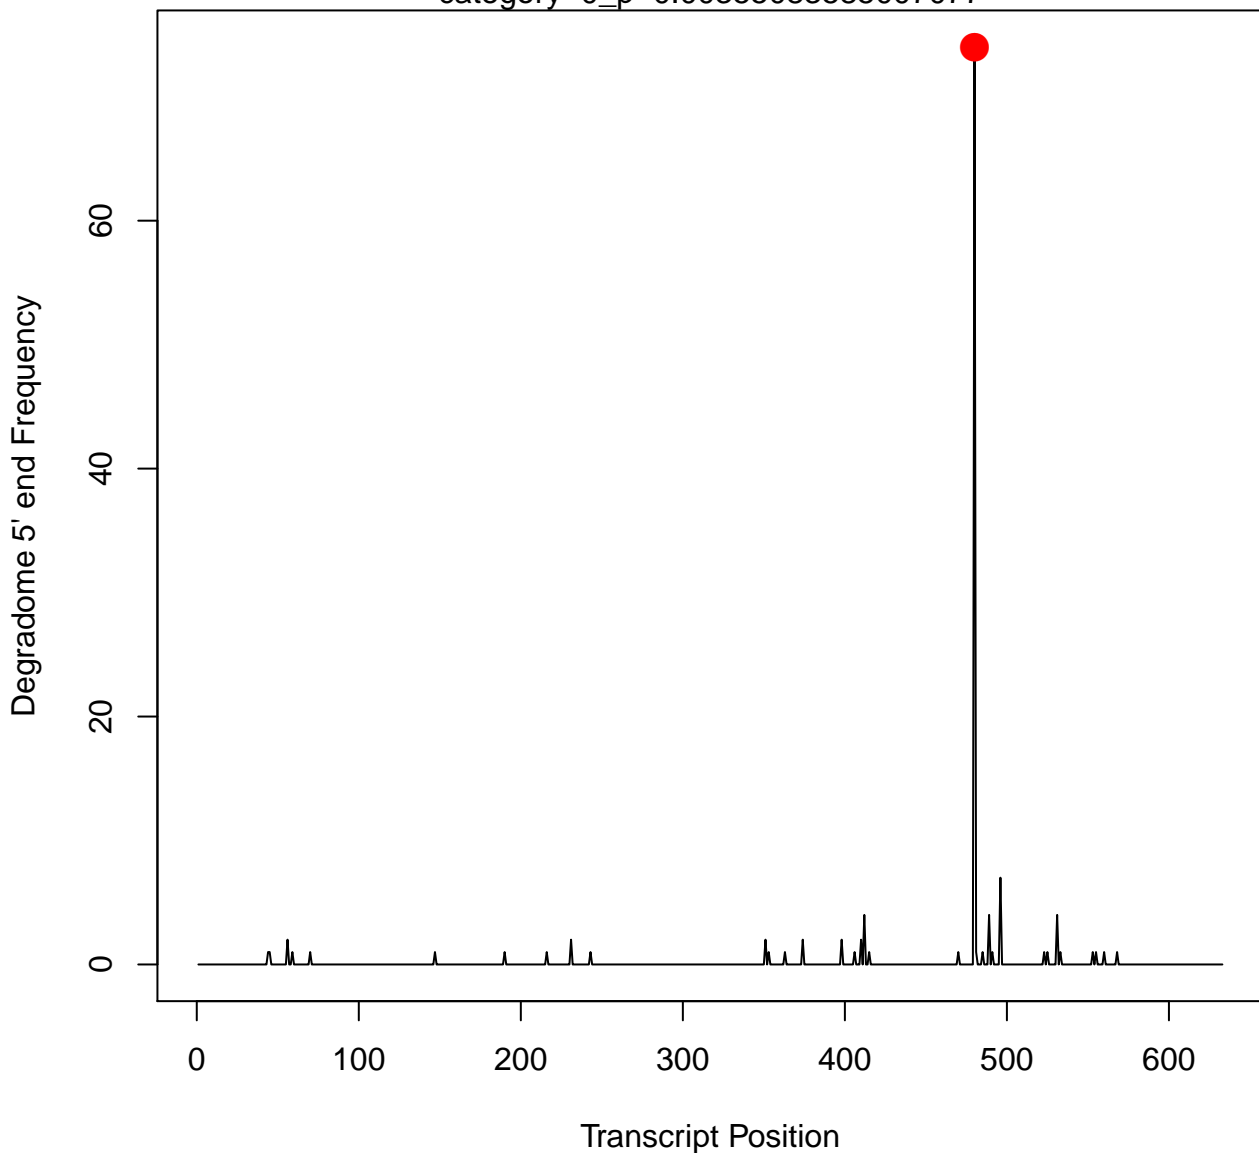

Supplement: s1 [file s1]

**T=Cluster-18410.112461\_Q=novel\_168\_S=245**

category=3\_p=0.0476770810492226

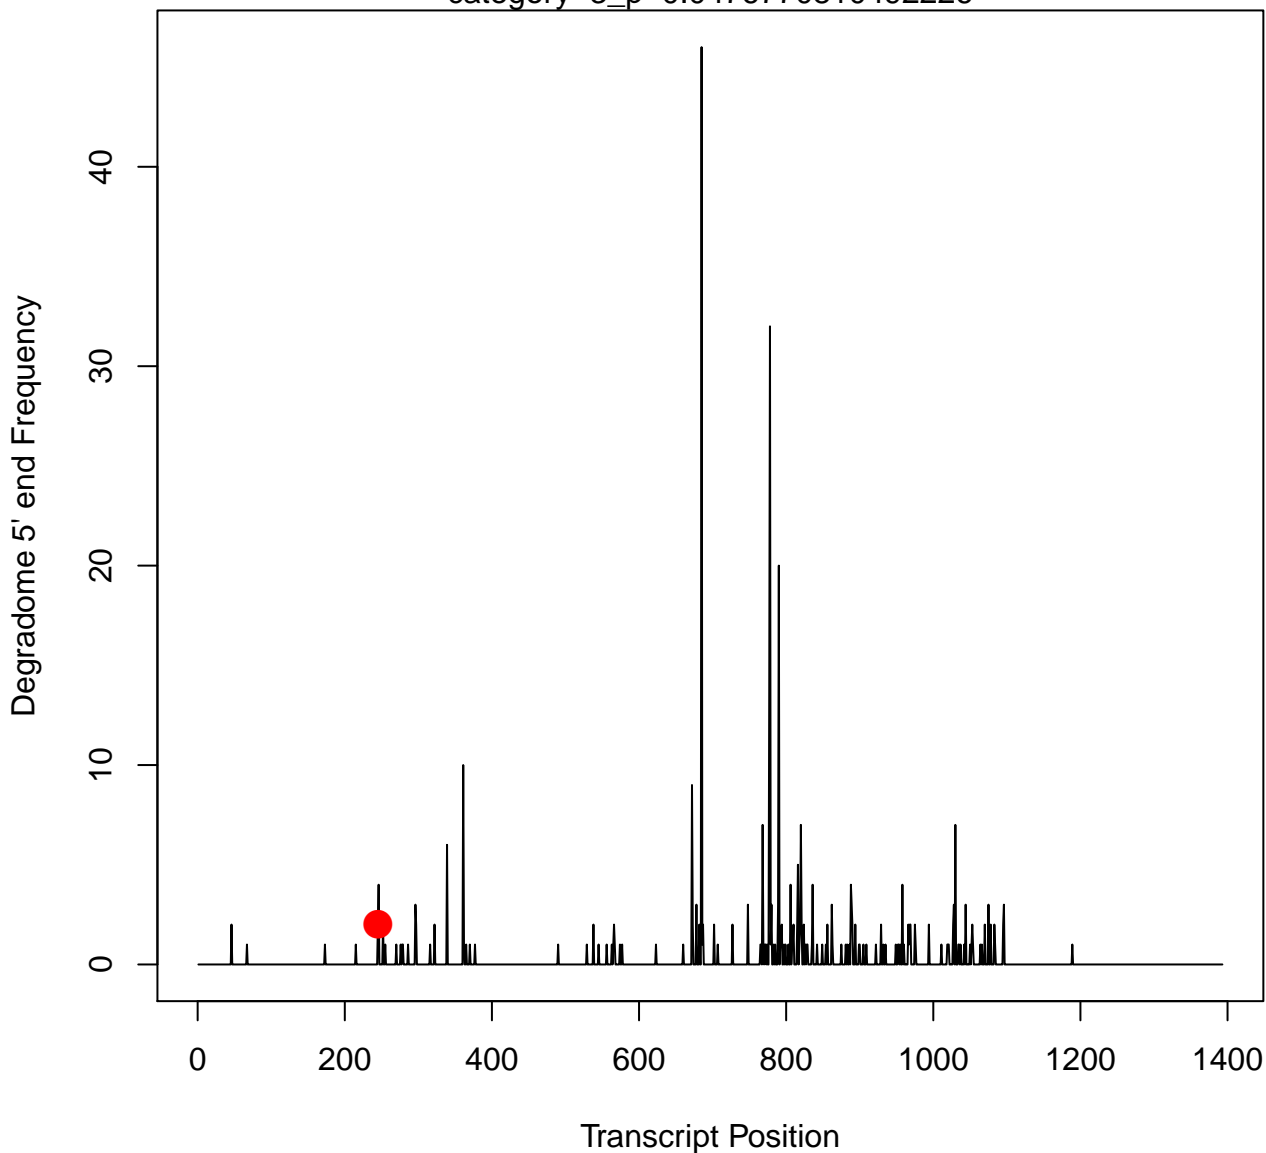

Supplement: s1 [file s1]

**T=Cluster-18410.65910\_Q=novel\_195\_S=1863**

category=0\_p=0.0160143951896974

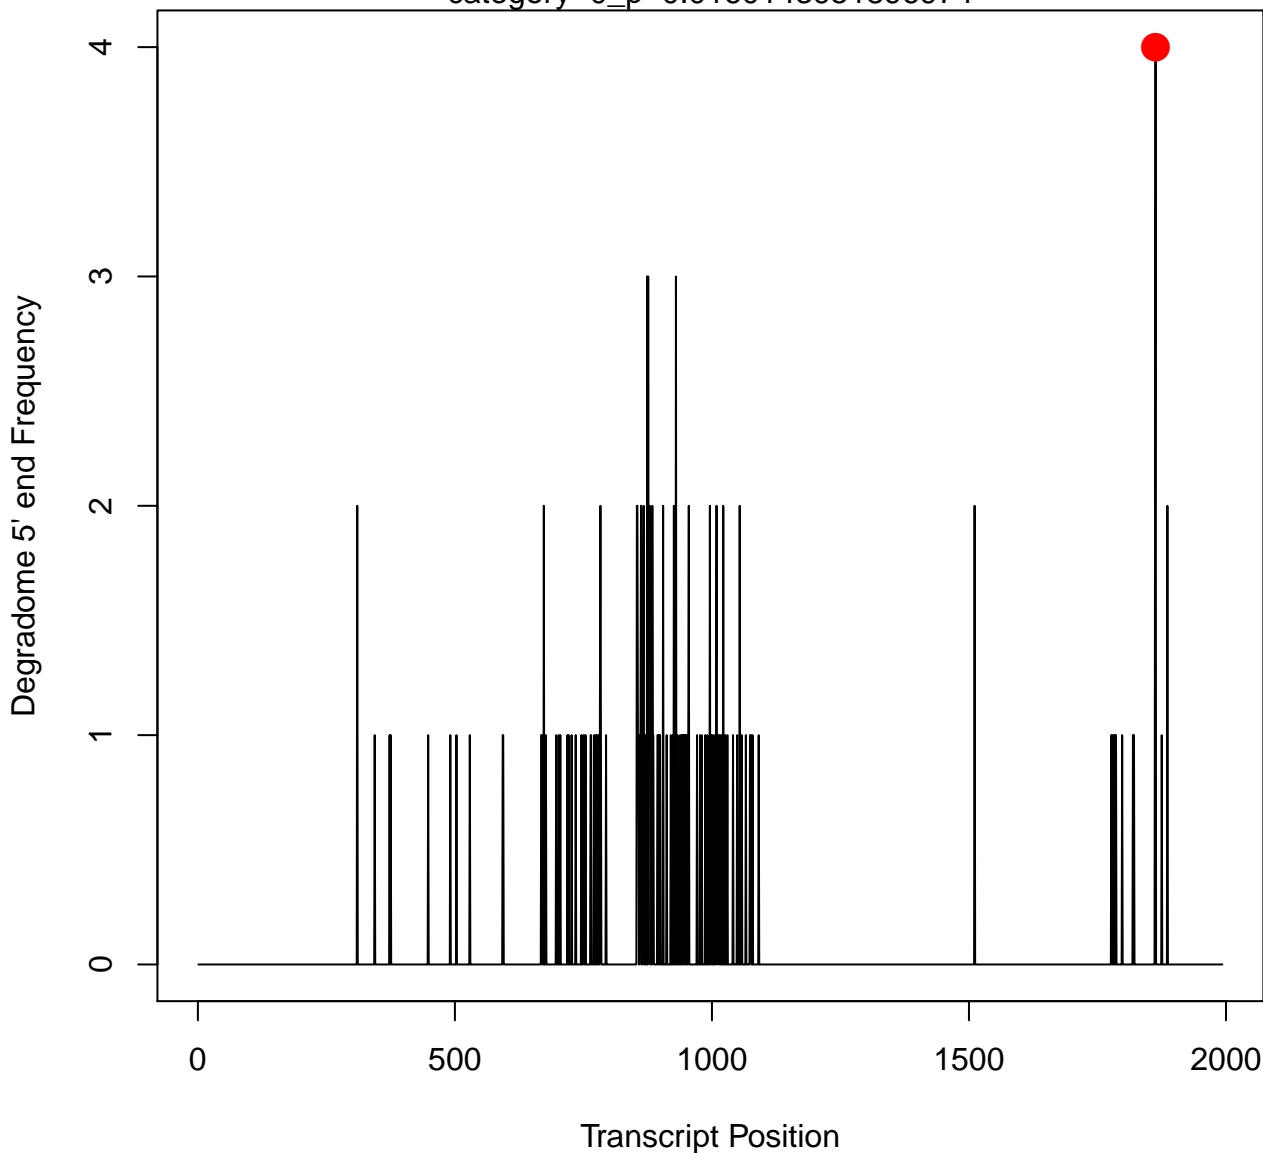

Supplement: s1 [file s1]

**T=Cluster-18410.89771\_Q=novel\_138\_S=789**

category=3\_p=0.0054131956921798

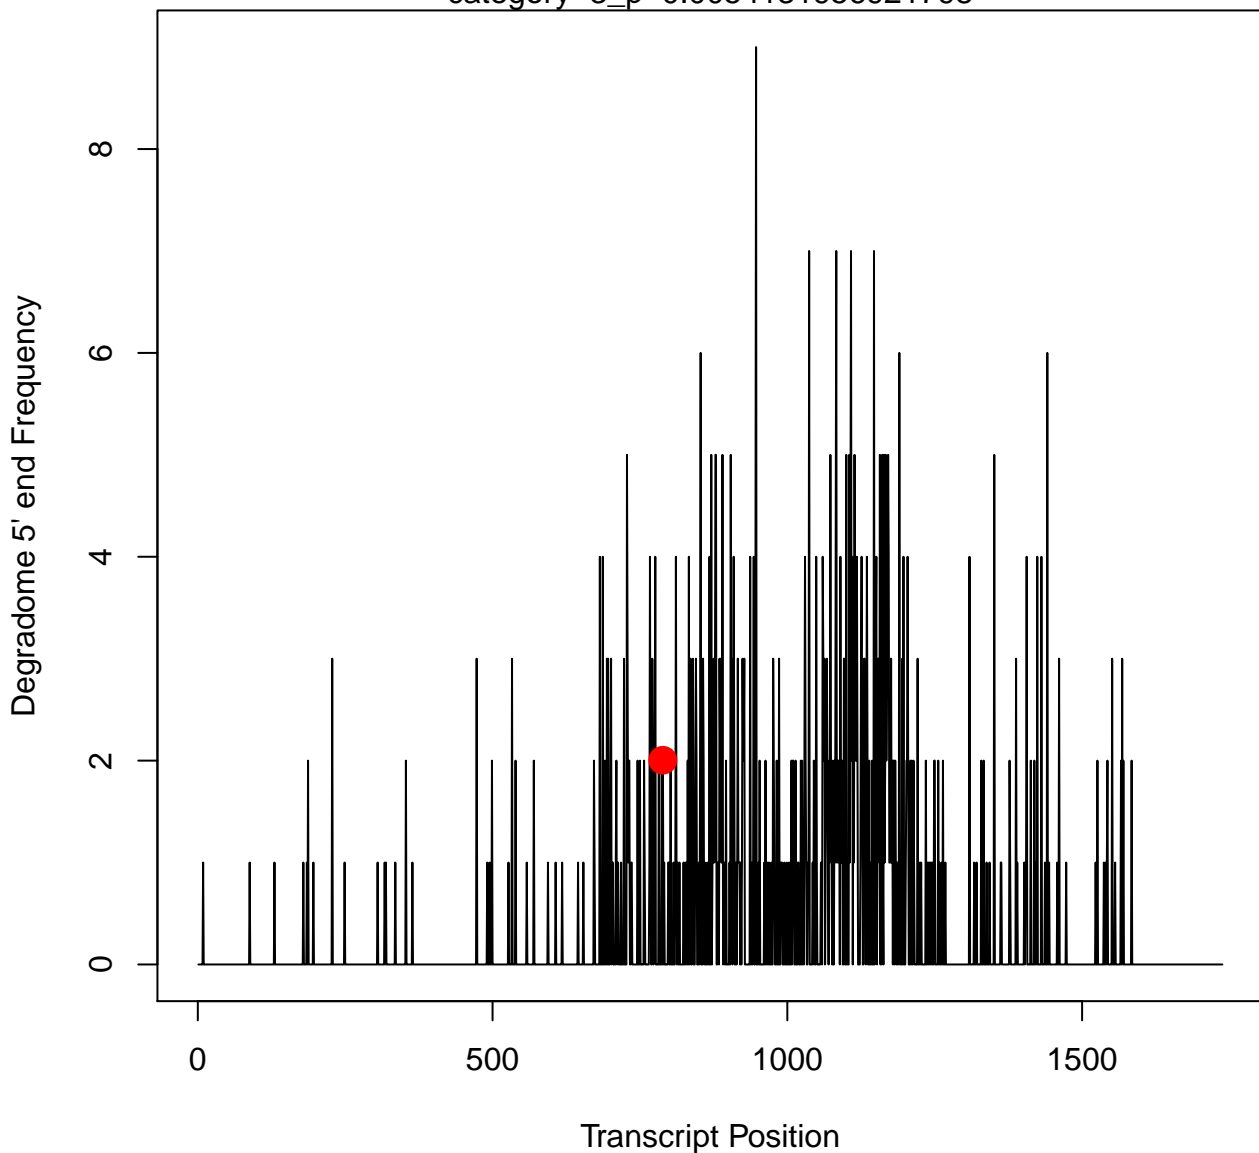

Supplement: s1 [file s1]

**T=Cluster-18410.68790\_Q=novel\_59\_S=544**

category=0\_p=0.000547104903662499

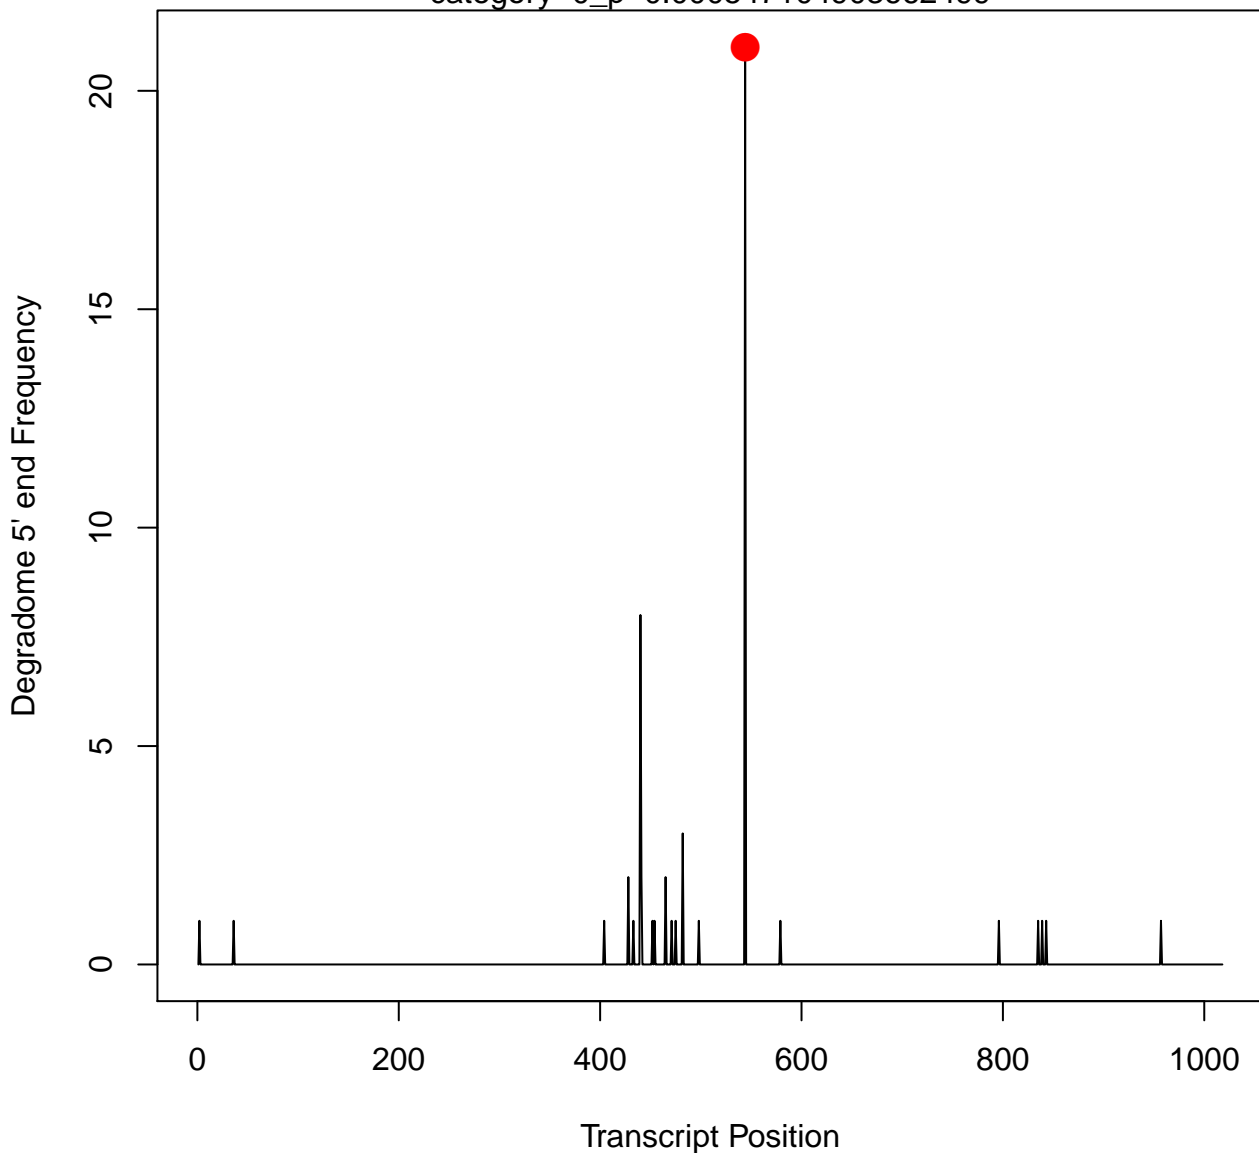

Supplement: s1 [file s1]

**T=Cluster-18410.71282\_Q=novel\_185\_S=205**

category=4\_p=0.0483072886549676

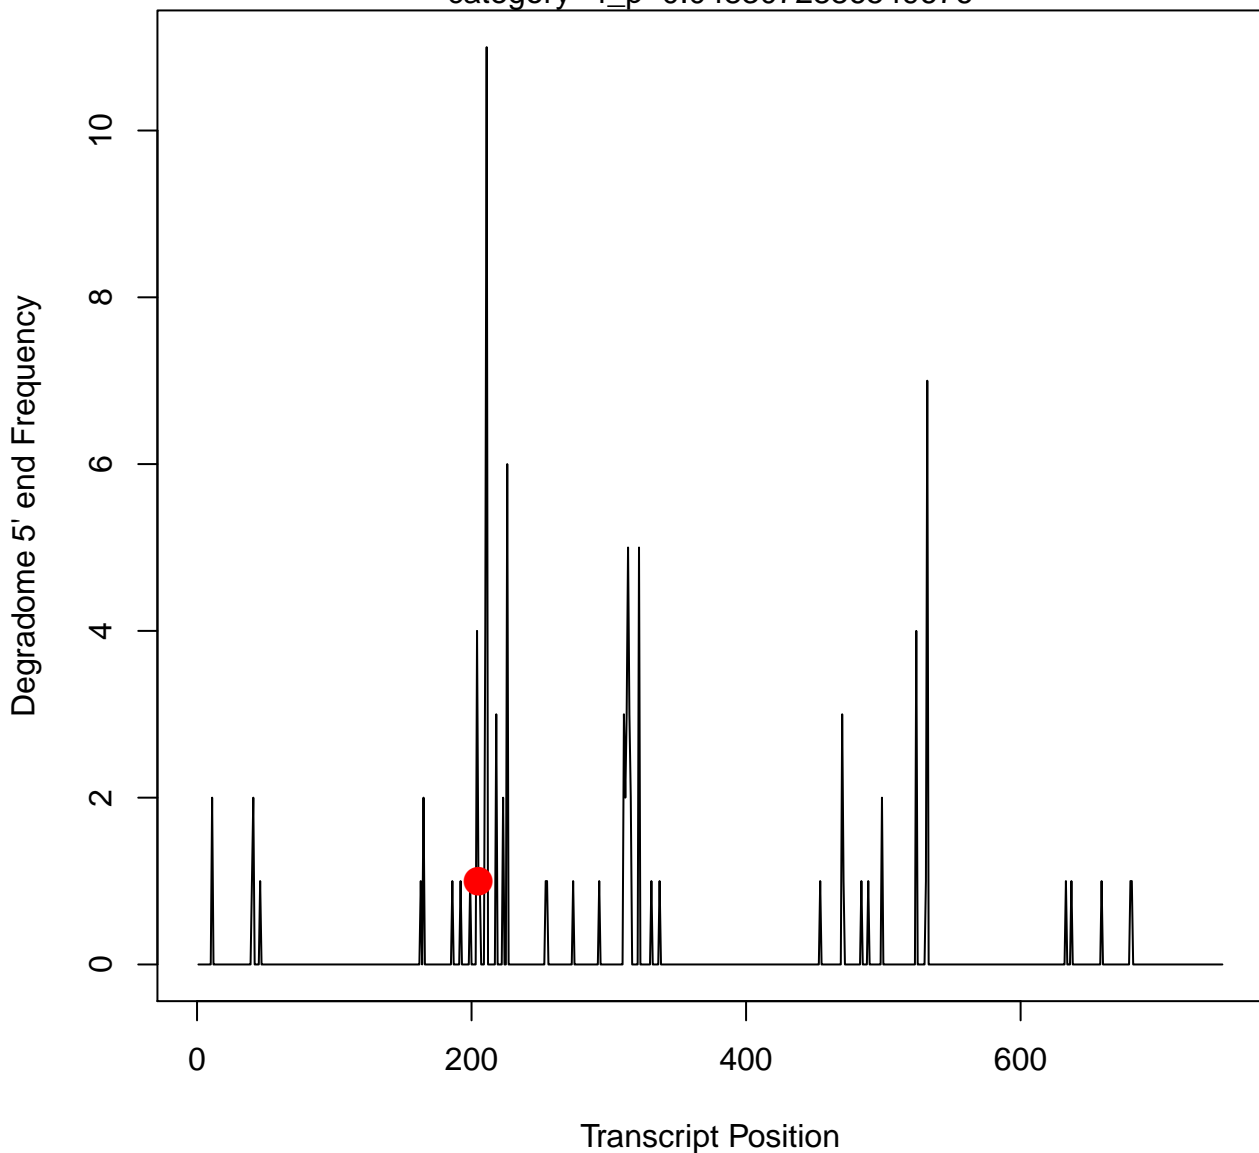

Supplement: s1 [file s1]

**T=Cluster-18410.89133\_Q=novel\_21\_S=234**

category=0\_p=0.0269917627532715

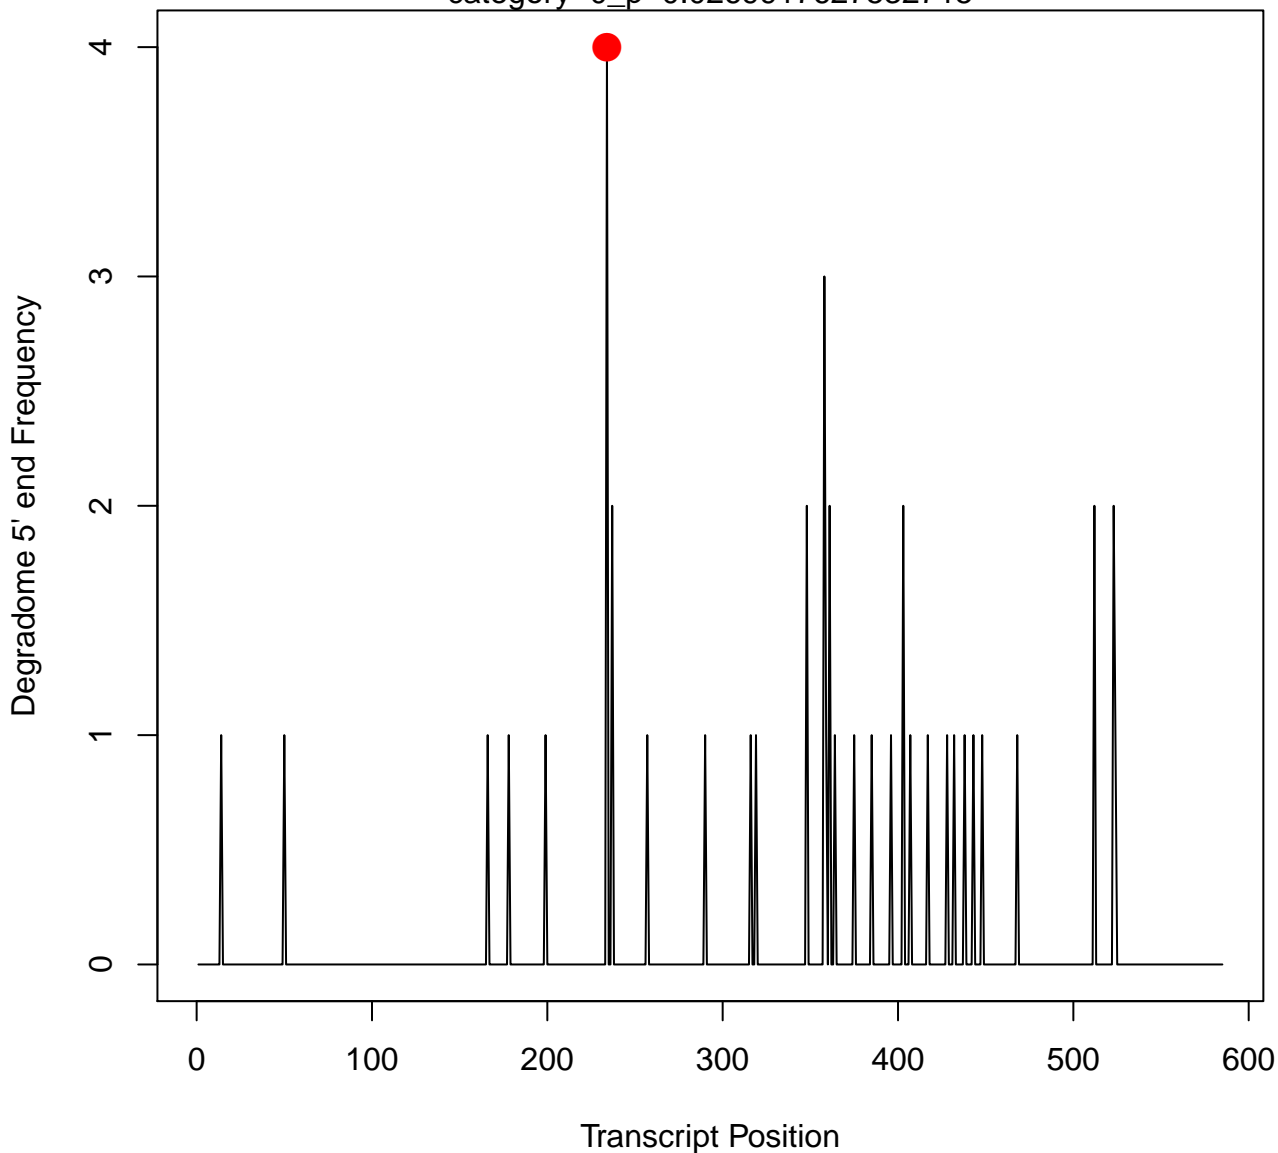

Supplement: s1 [file s1]

**T=Cluster-18410.19873\_Q=novel\_47\_S=372**

category=1\_p=0.0157838932790664

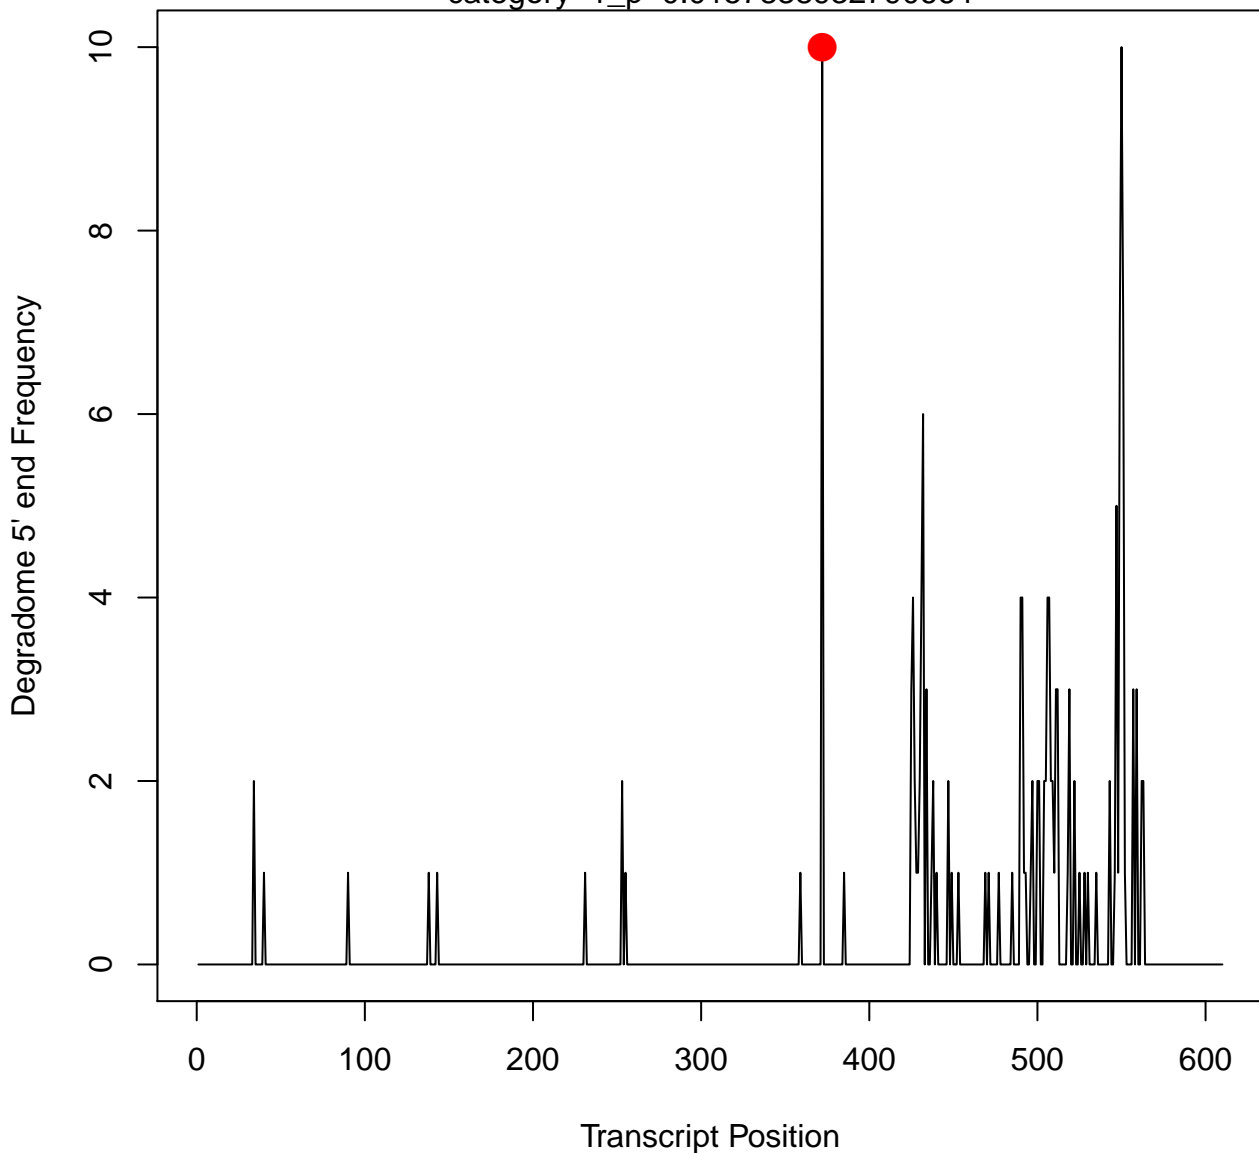

Supplement: s1 [file s1]

**T=Cluster-18410.79736\_Q=novel\_32\_S=925**

category=0\_p=0.00382345425486719

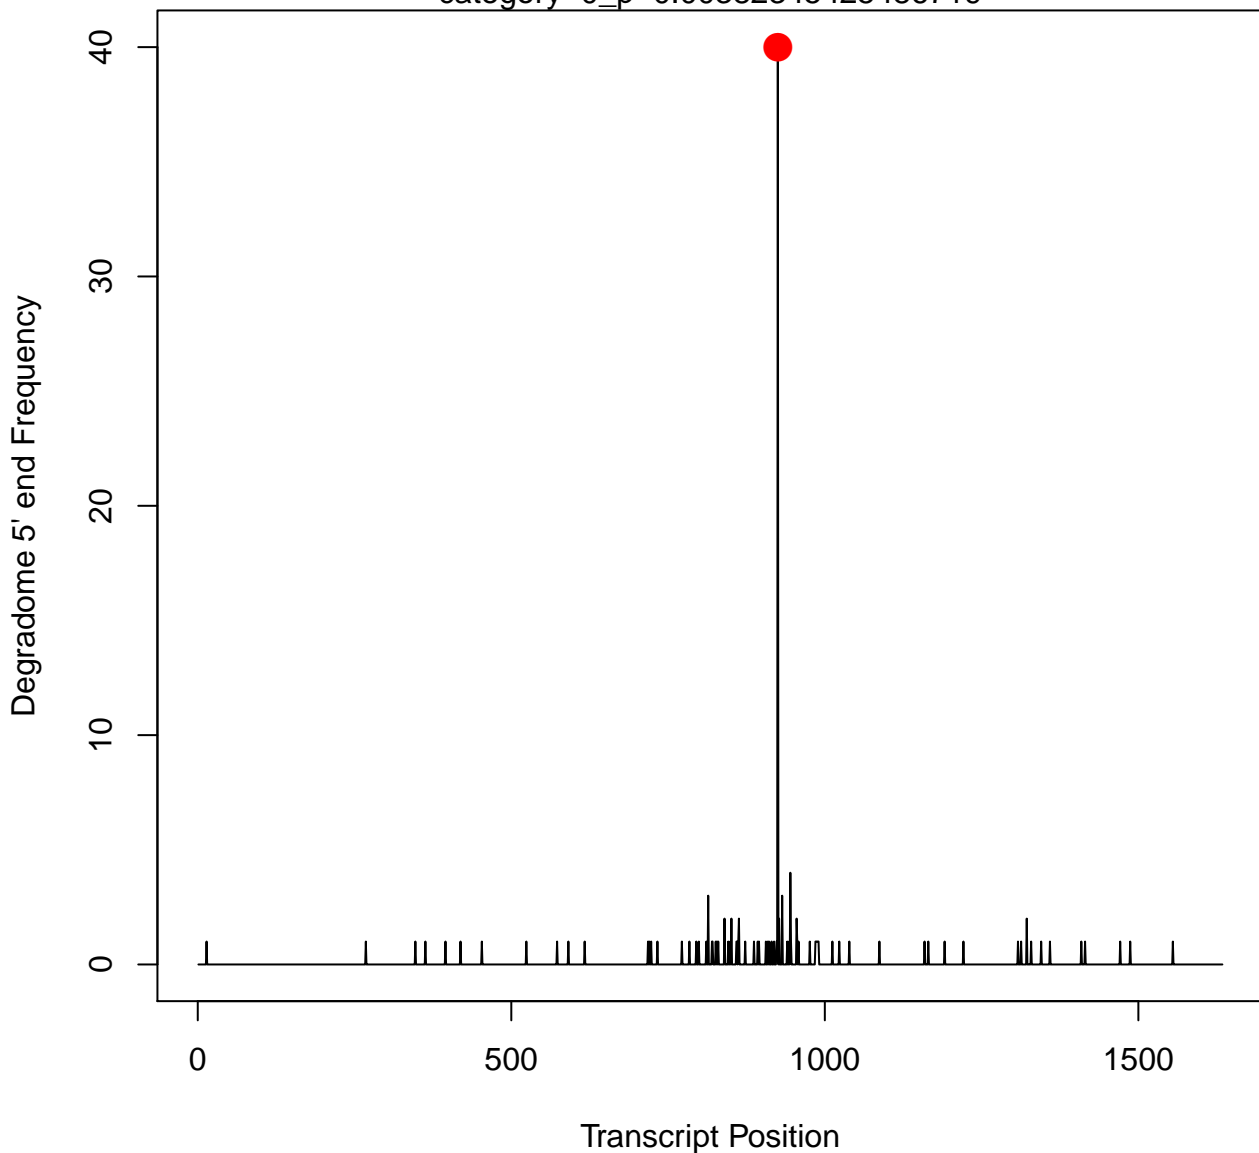

Supplement: s1 [file s1]

**T=Cluster-18410.117126\_Q=novel\_82\_S=547**

category=0\_p=0.0972743695385035

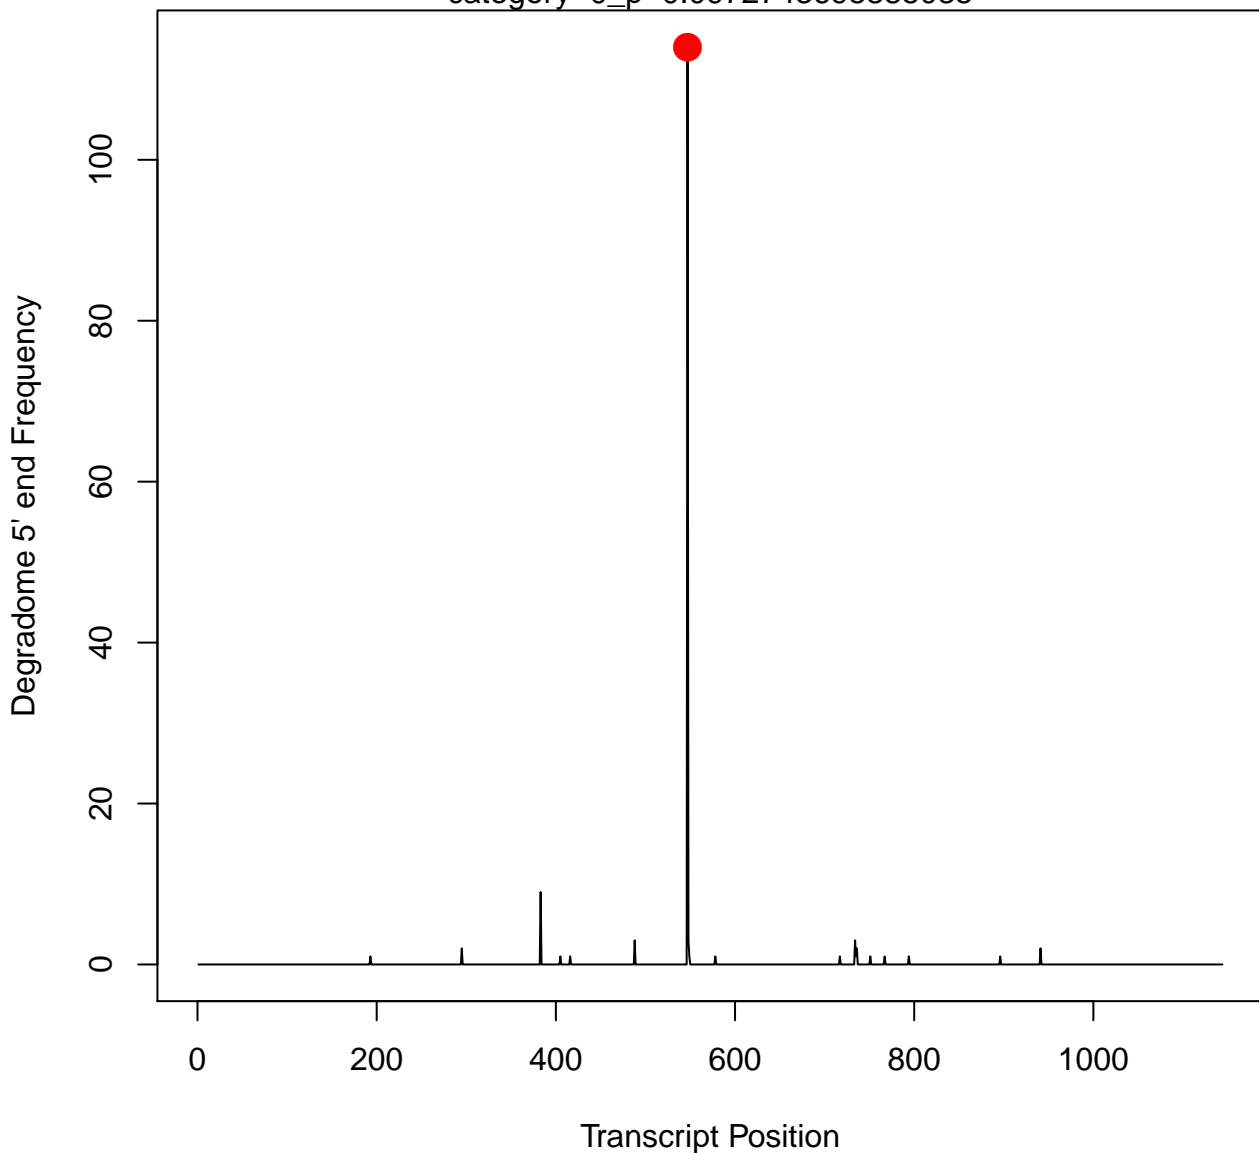

Supplement: s1 [file s1]

**T=Cluster-18410.32233\_Q=novel\_148\_S=270**

category=2\_p=0.0342485307007228

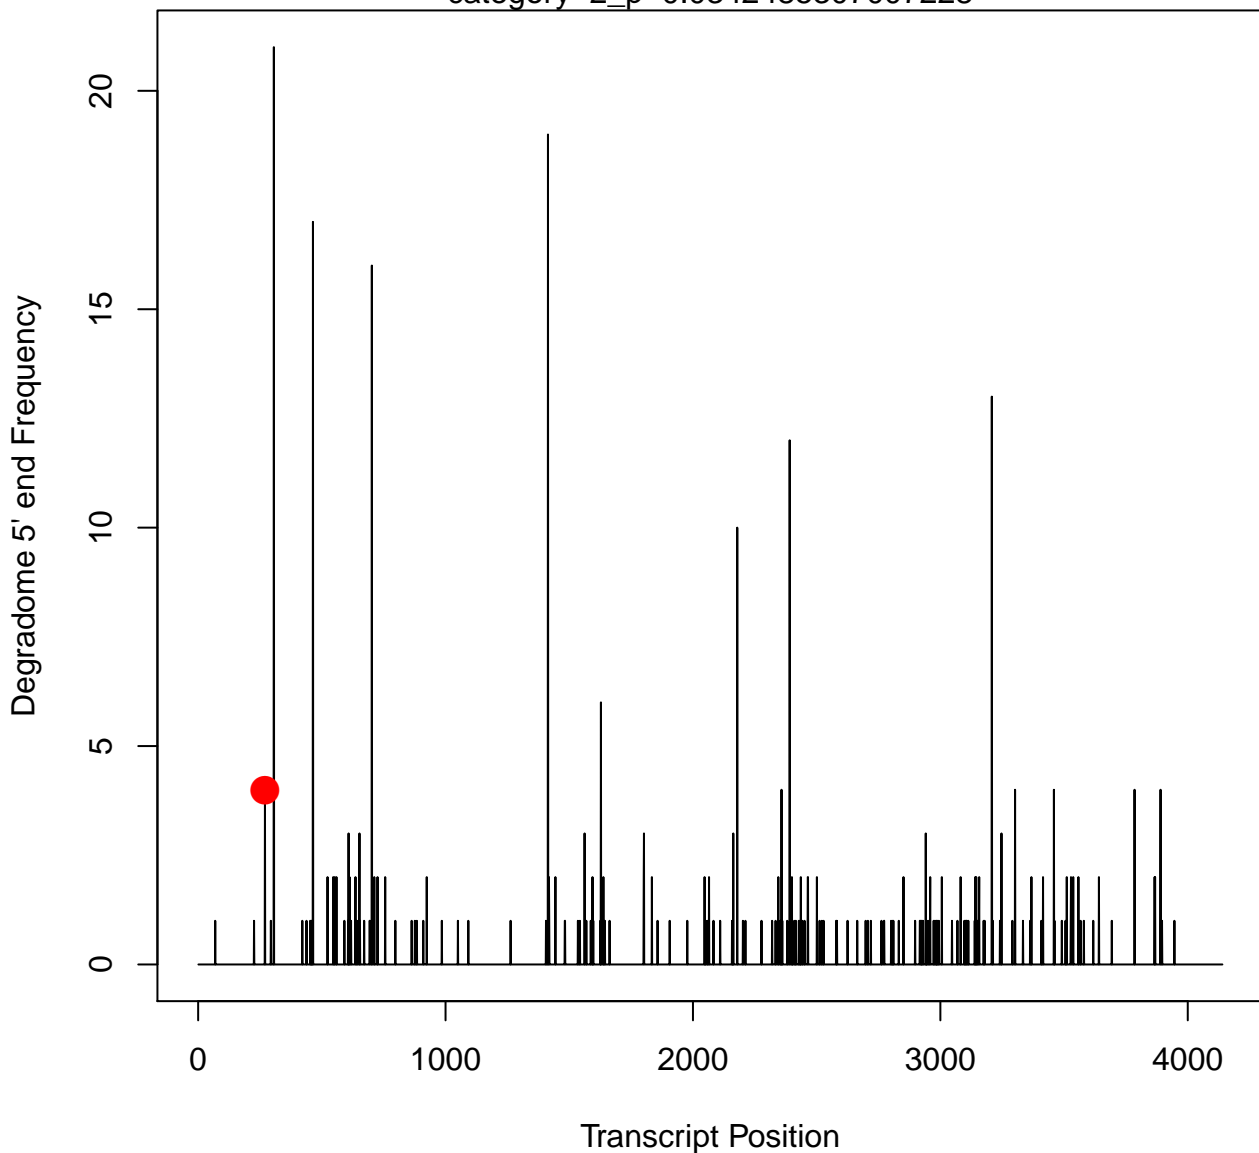

Supplement: s1 [file s1]

**T=Cluster-16849.0\_Q=pma-miR482a\_S=321**

category=0\_p=0.0788092874808648

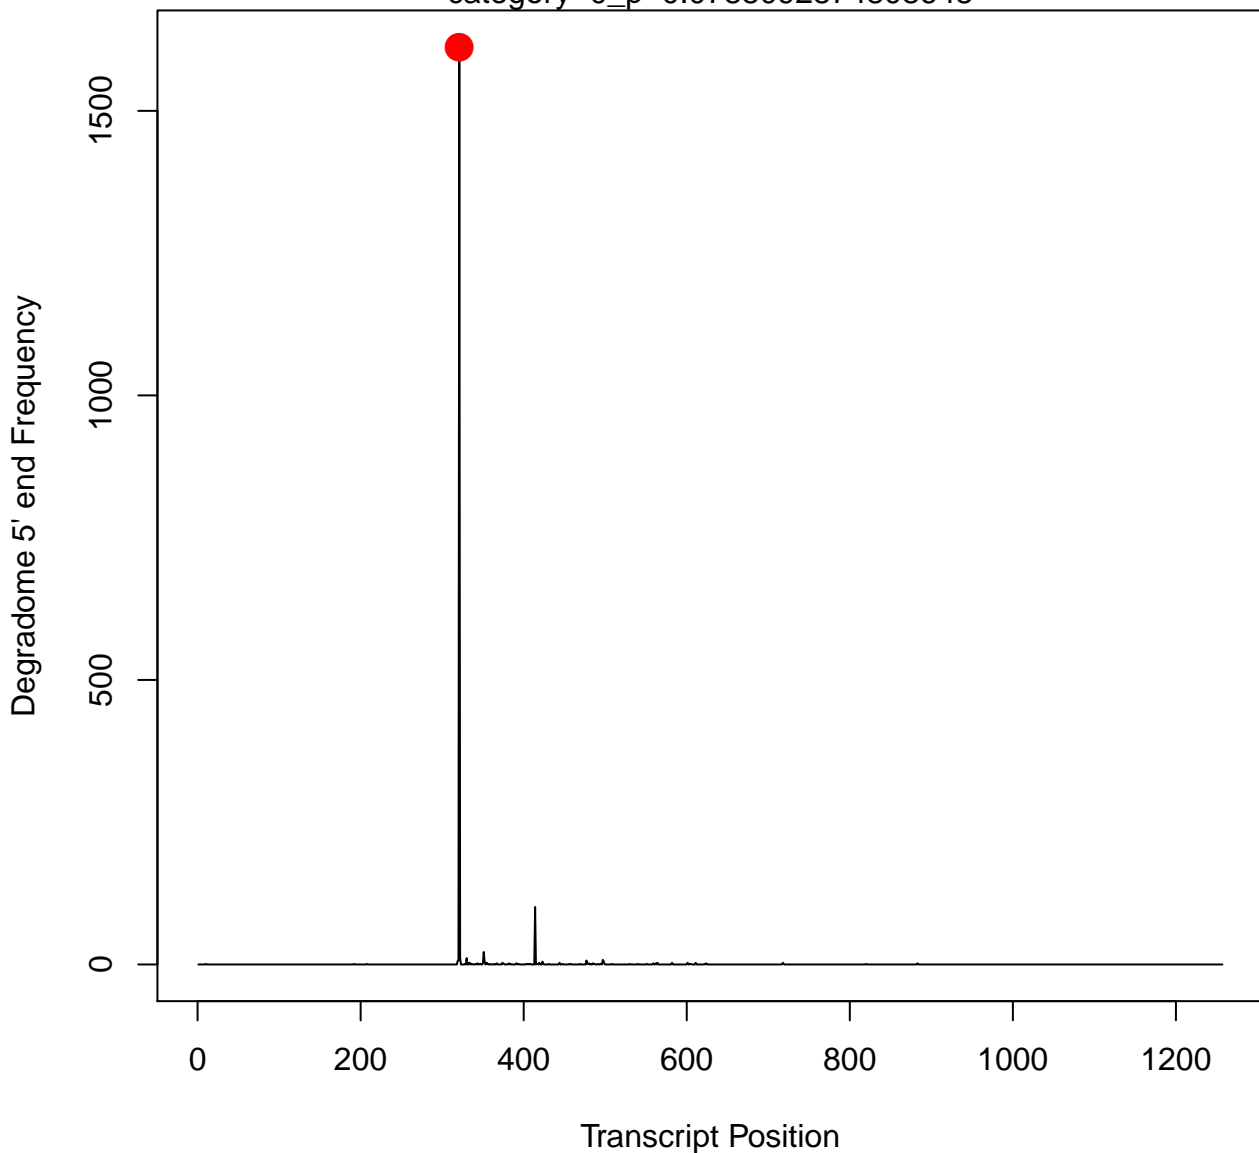

Supplement: s1 [file s1]

**T=Cluster-18410.109272\_Q=novel\_9\_S=611**

category=0\_p=0.0108854128106712

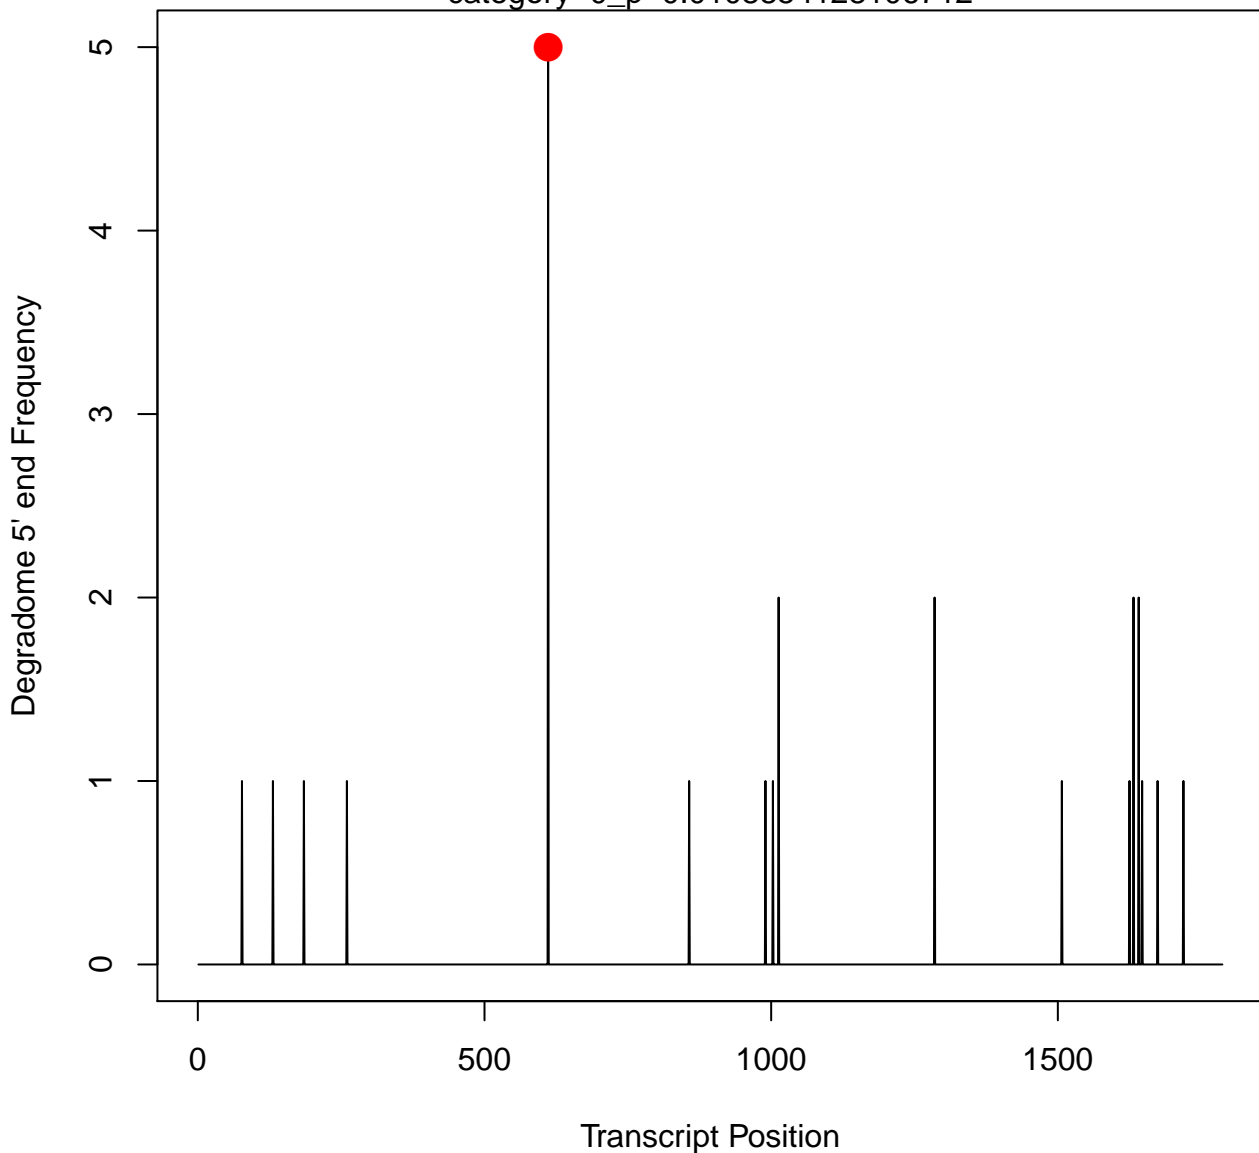

Supplement: s1 [file s1]

**T=Cluster-18410.117697\_Q=novel\_127\_S=783**

category=4\_p=0.024452609380235

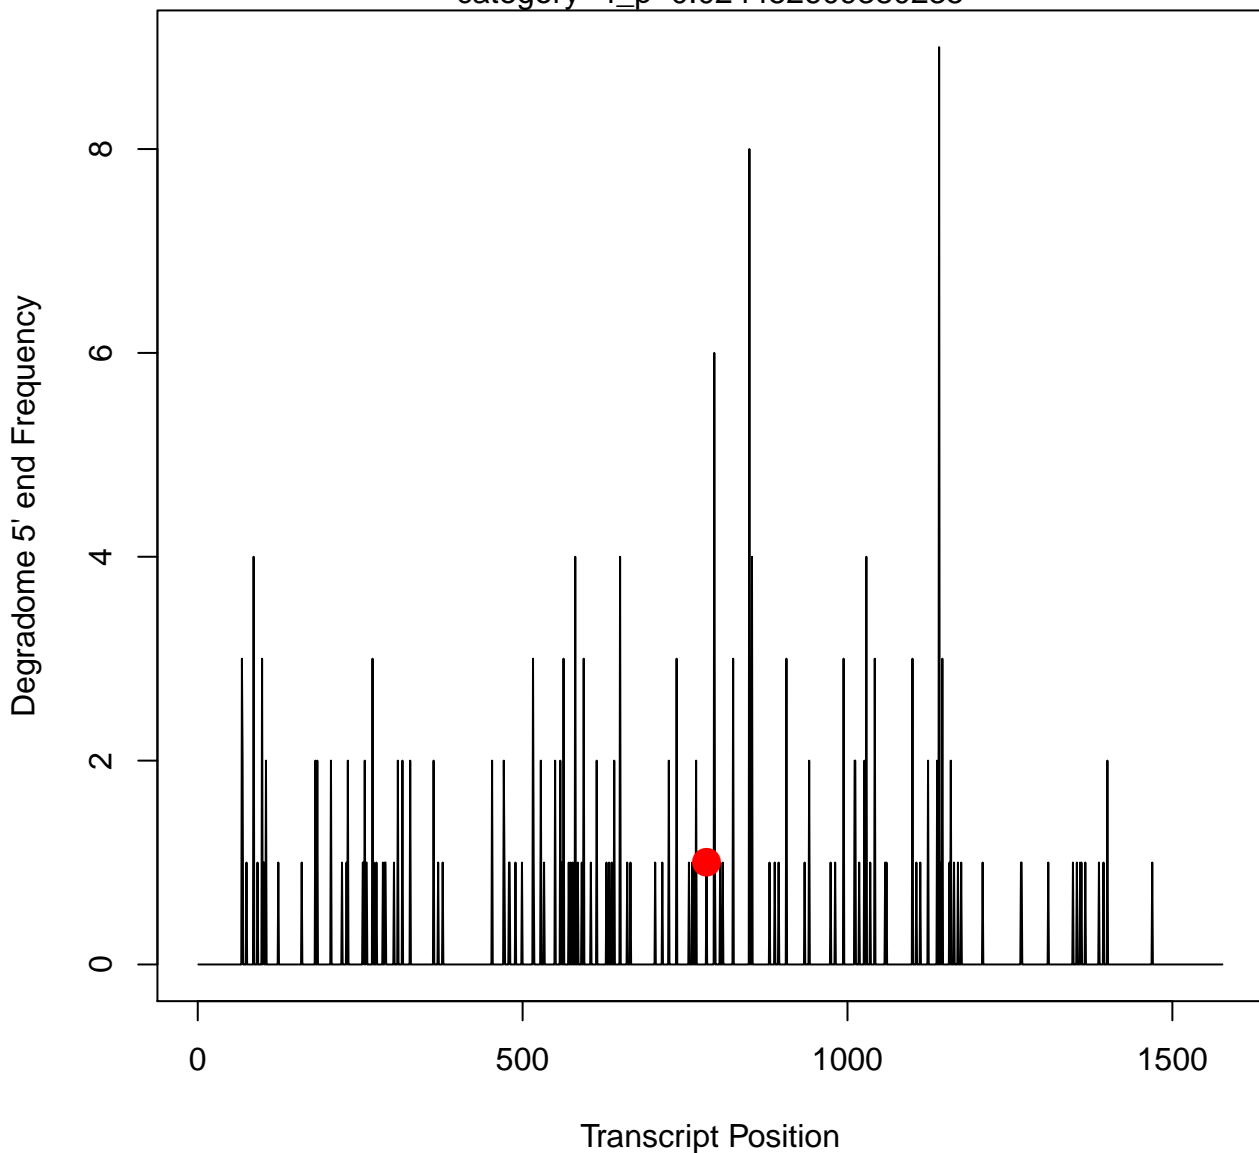

Supplement: s1 [file s1]

**T=Cluster-18410.34721\_Q=novel\_79\_S=813**

category=3\_p=0.0979903877508393

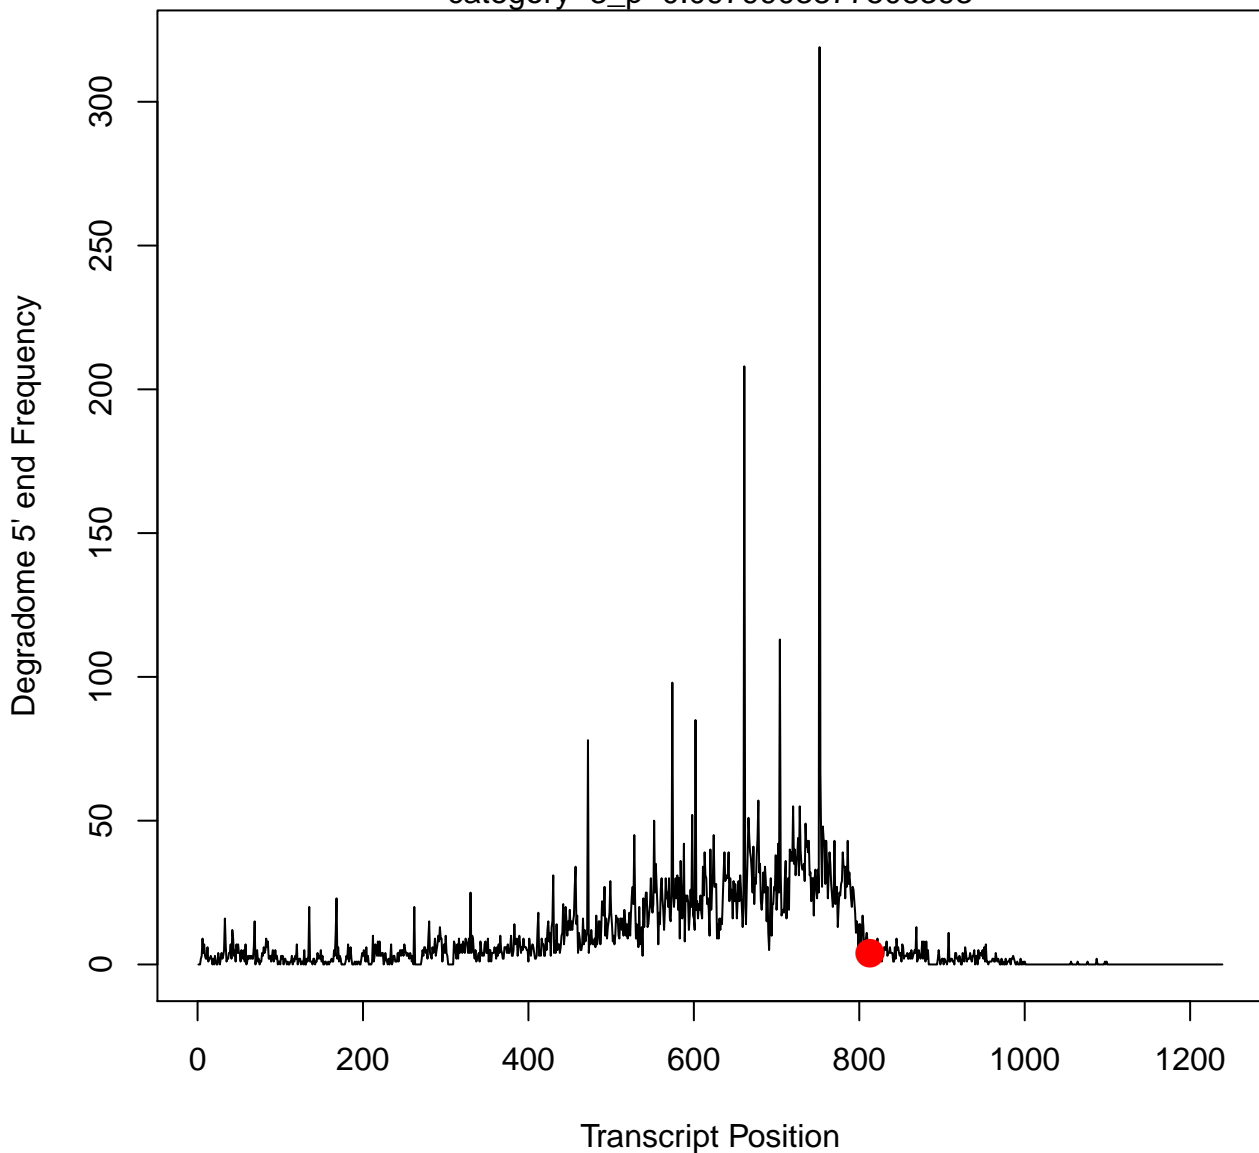

Supplement: s1 [file s1]

**T=Cluster-18410.30775\_Q=pma-miR1314\_S=161**

category=0\_p=0.00245961596621247

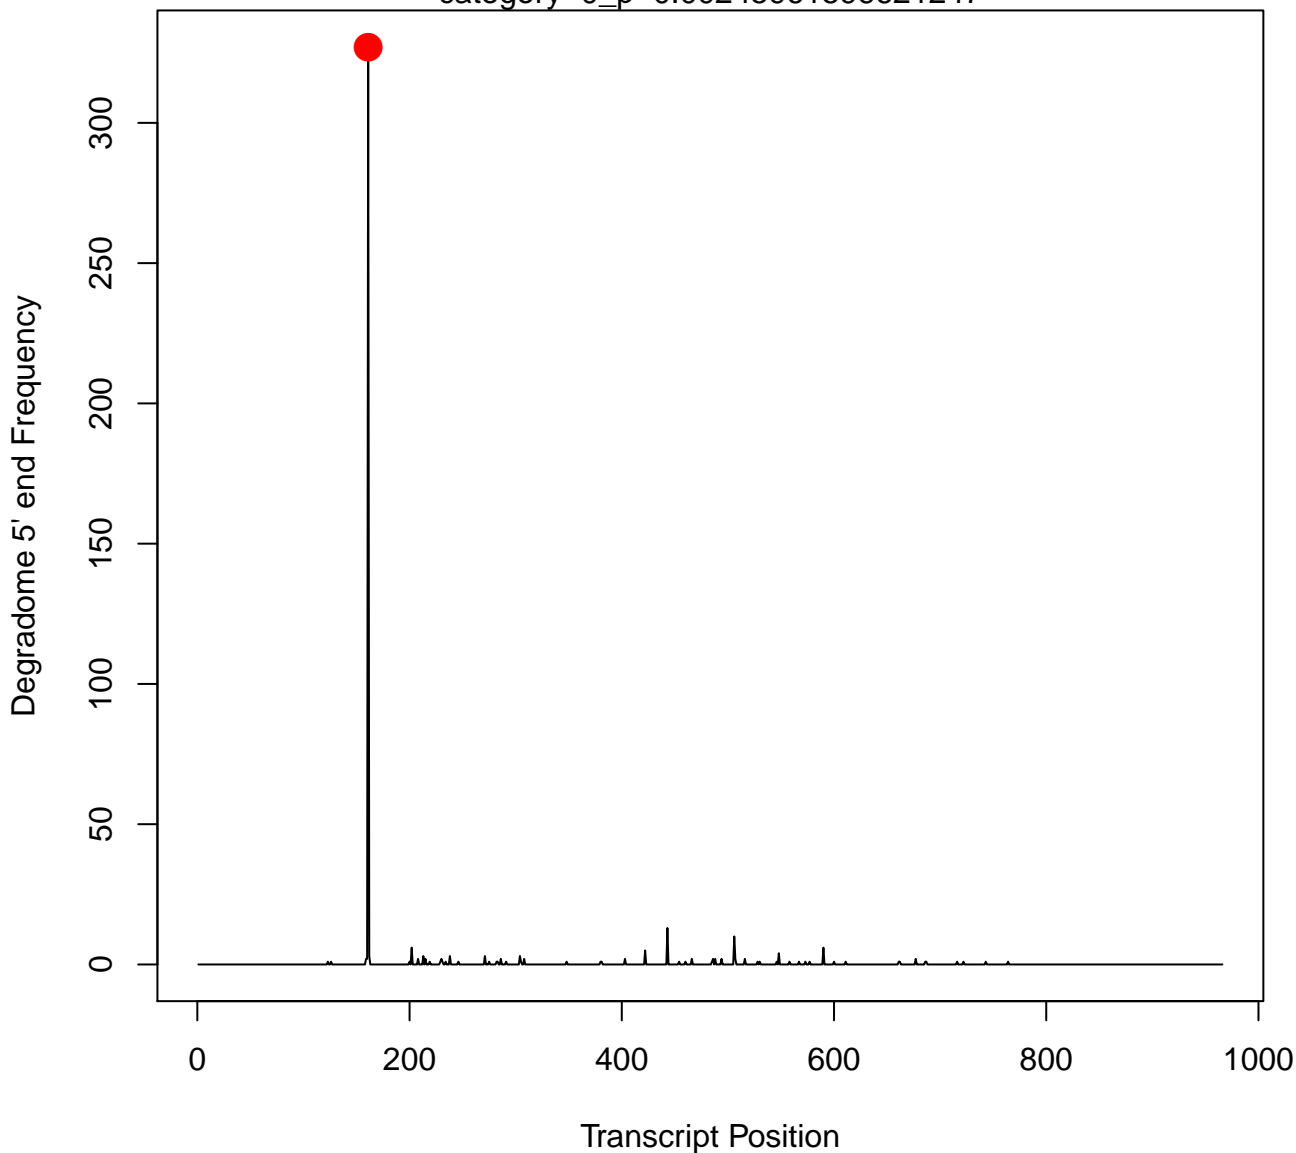

Supplement: s1 [file s1]

**T=Cluster-18410.90338\_Q=novel\_35\_S=317**

category=0\_p=0.00464086203705827

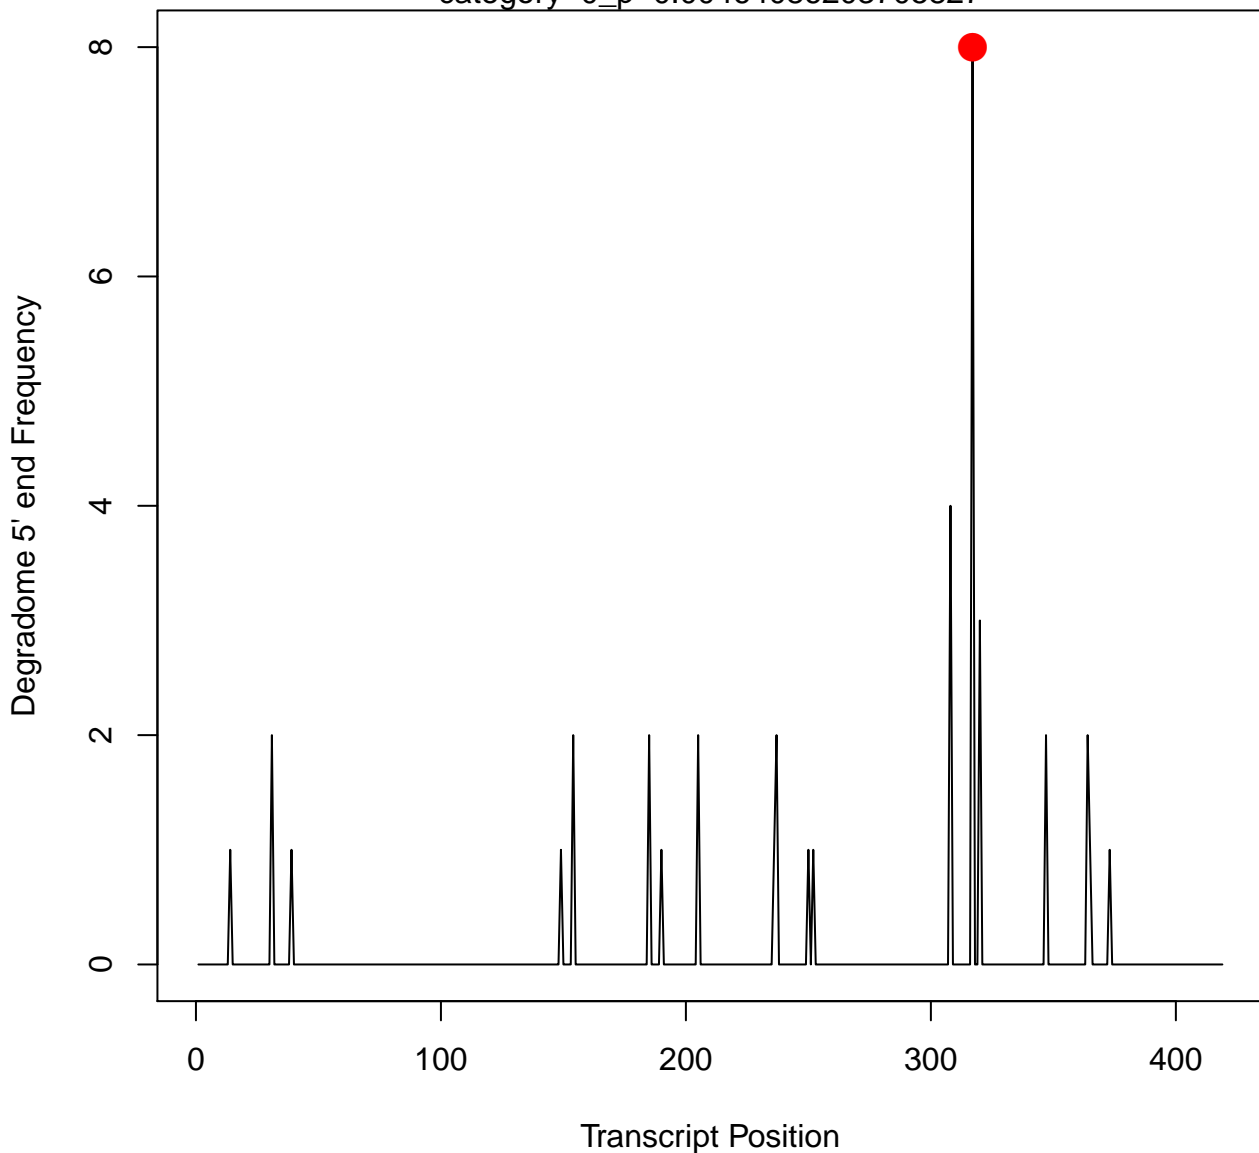

Supplement: s1 [file s1]

**T=Cluster-18410.78235\_Q=novel\_46\_S=469**

category=0\_p=0.00218662432695249

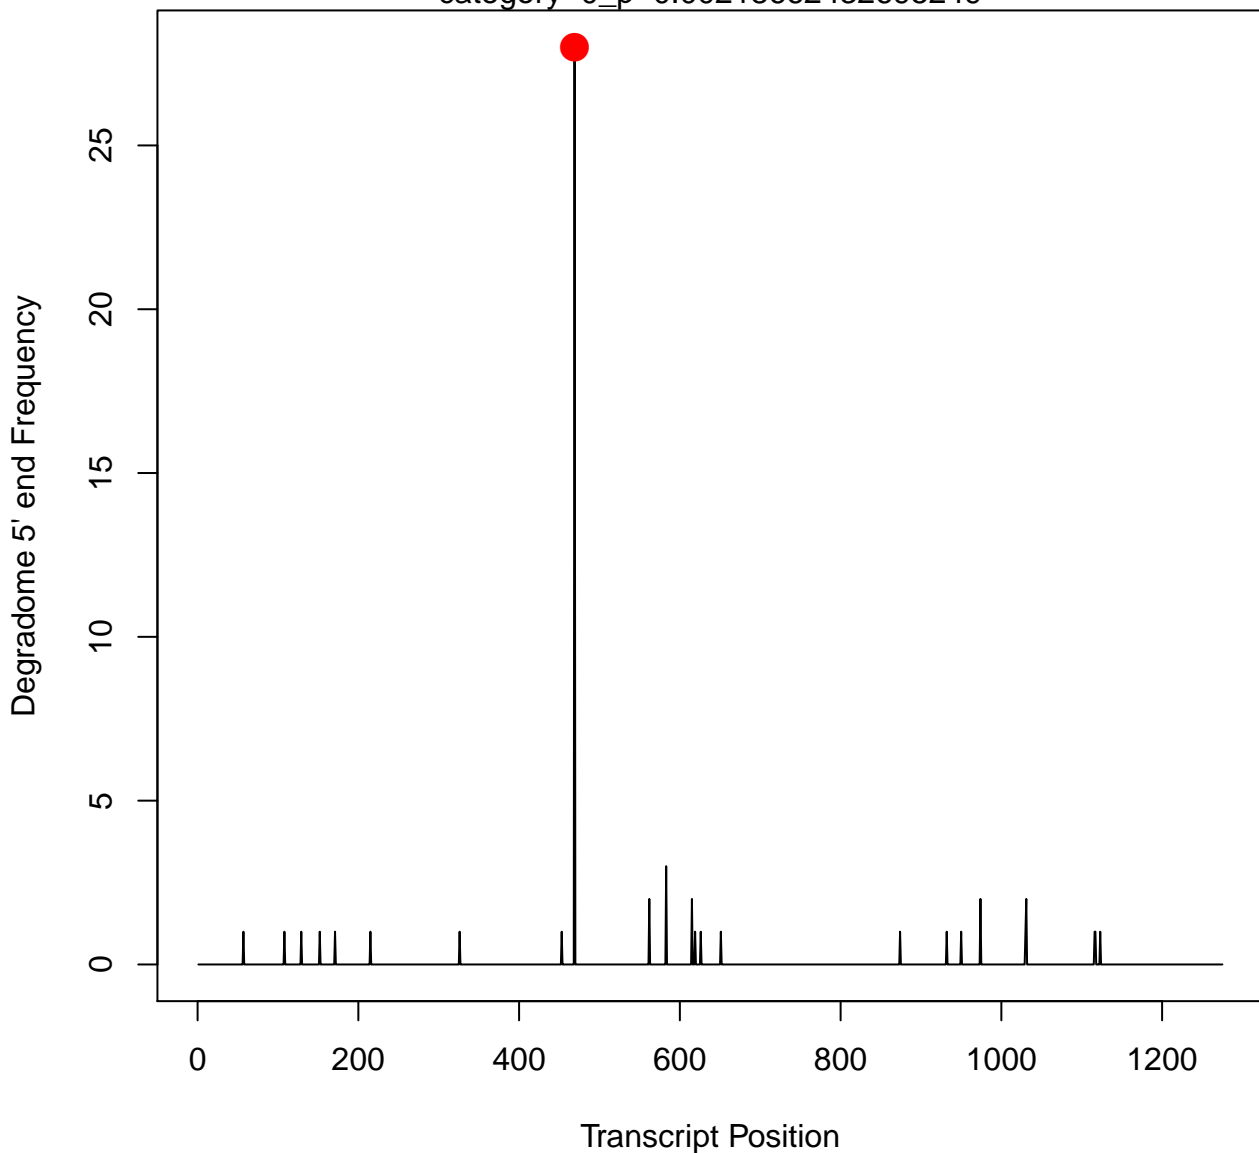

Supplement: s1 [file s1]

**T=Cluster-18410.62427\_Q=pma-miR159a\_S=569**

category=0\_p=0.000547104903662499

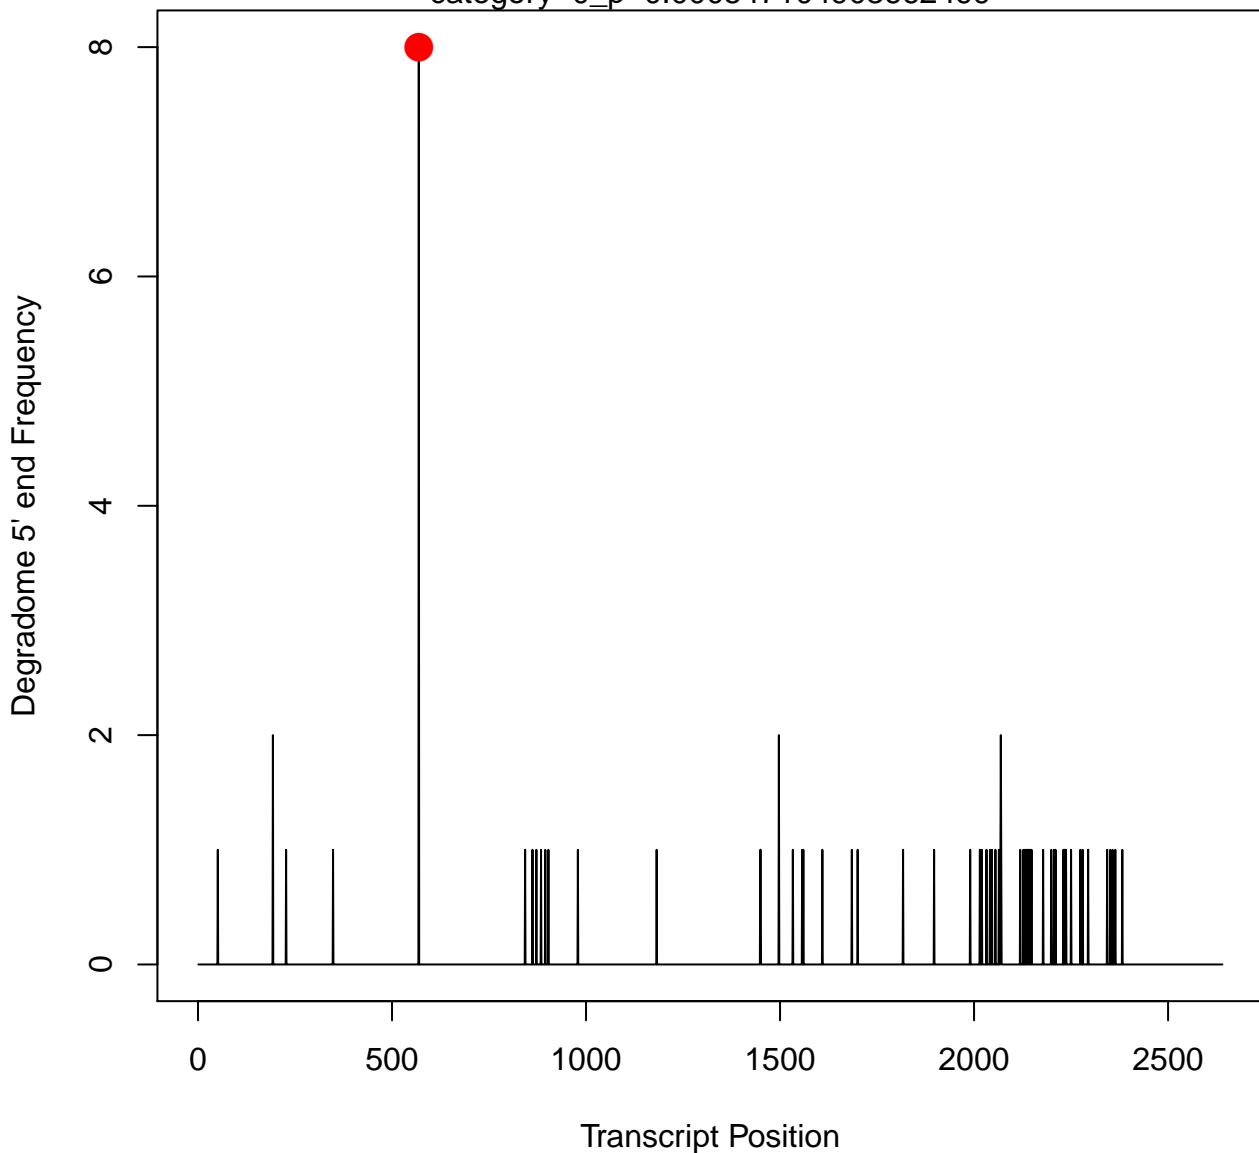

Supplement: s1 [file s1]

**T=Cluster-18410.92851\_Q=novel\_122\_S=148**

category=0\_p=0.0793132754368923

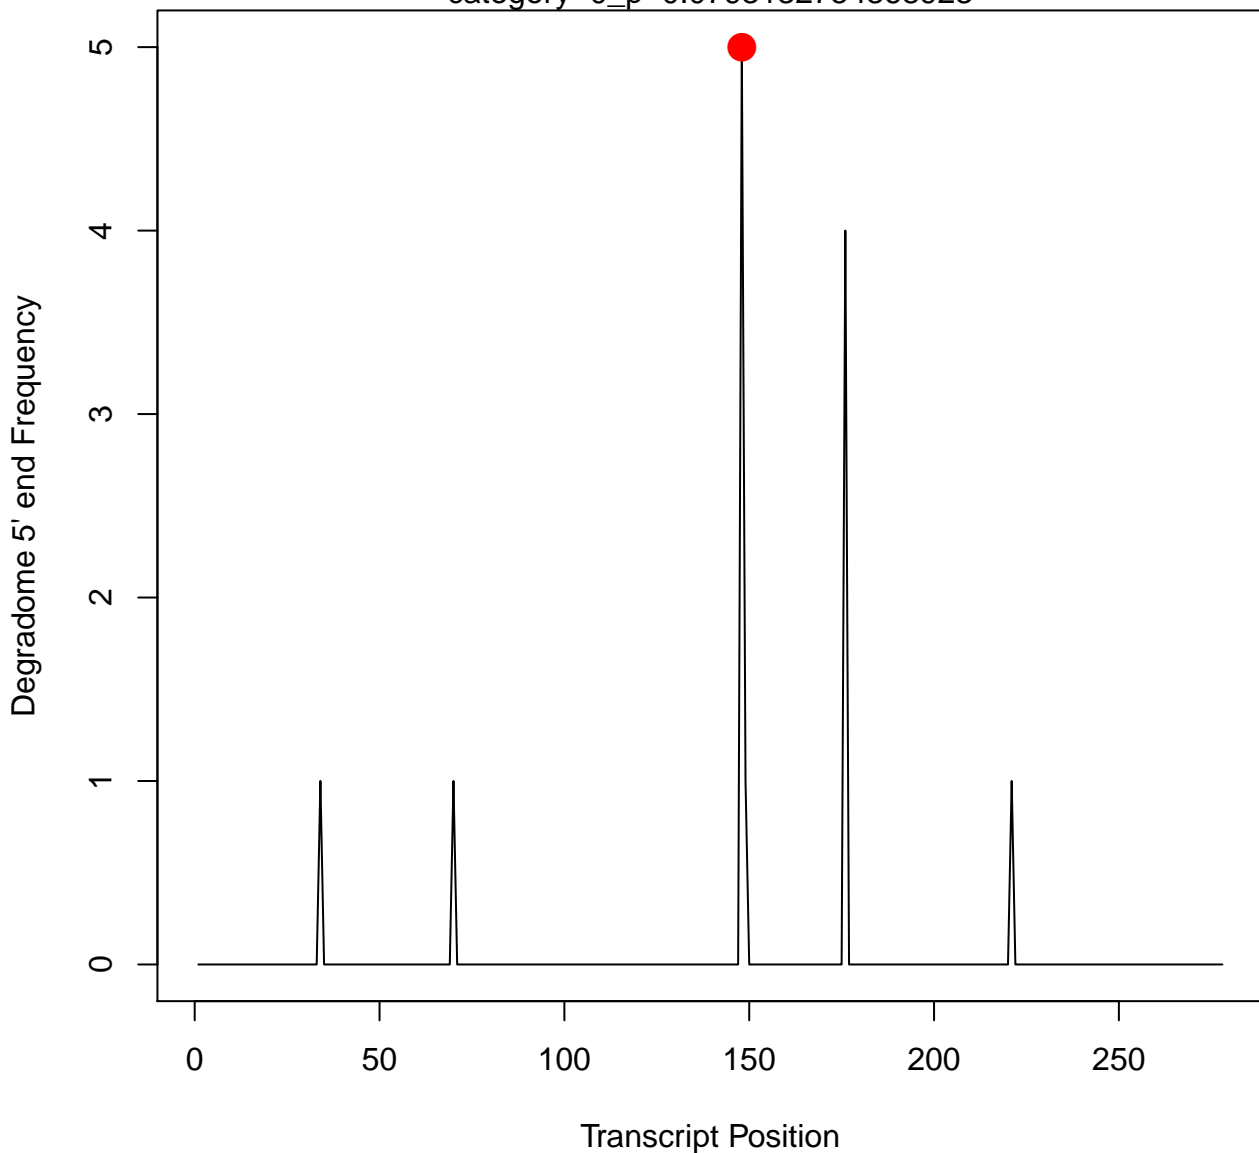

Supplement: s1 [file s1]

**T=Cluster-18410.96040\_Q=novel\_8\_S=451**

category=2\_p=0.0673240995462872

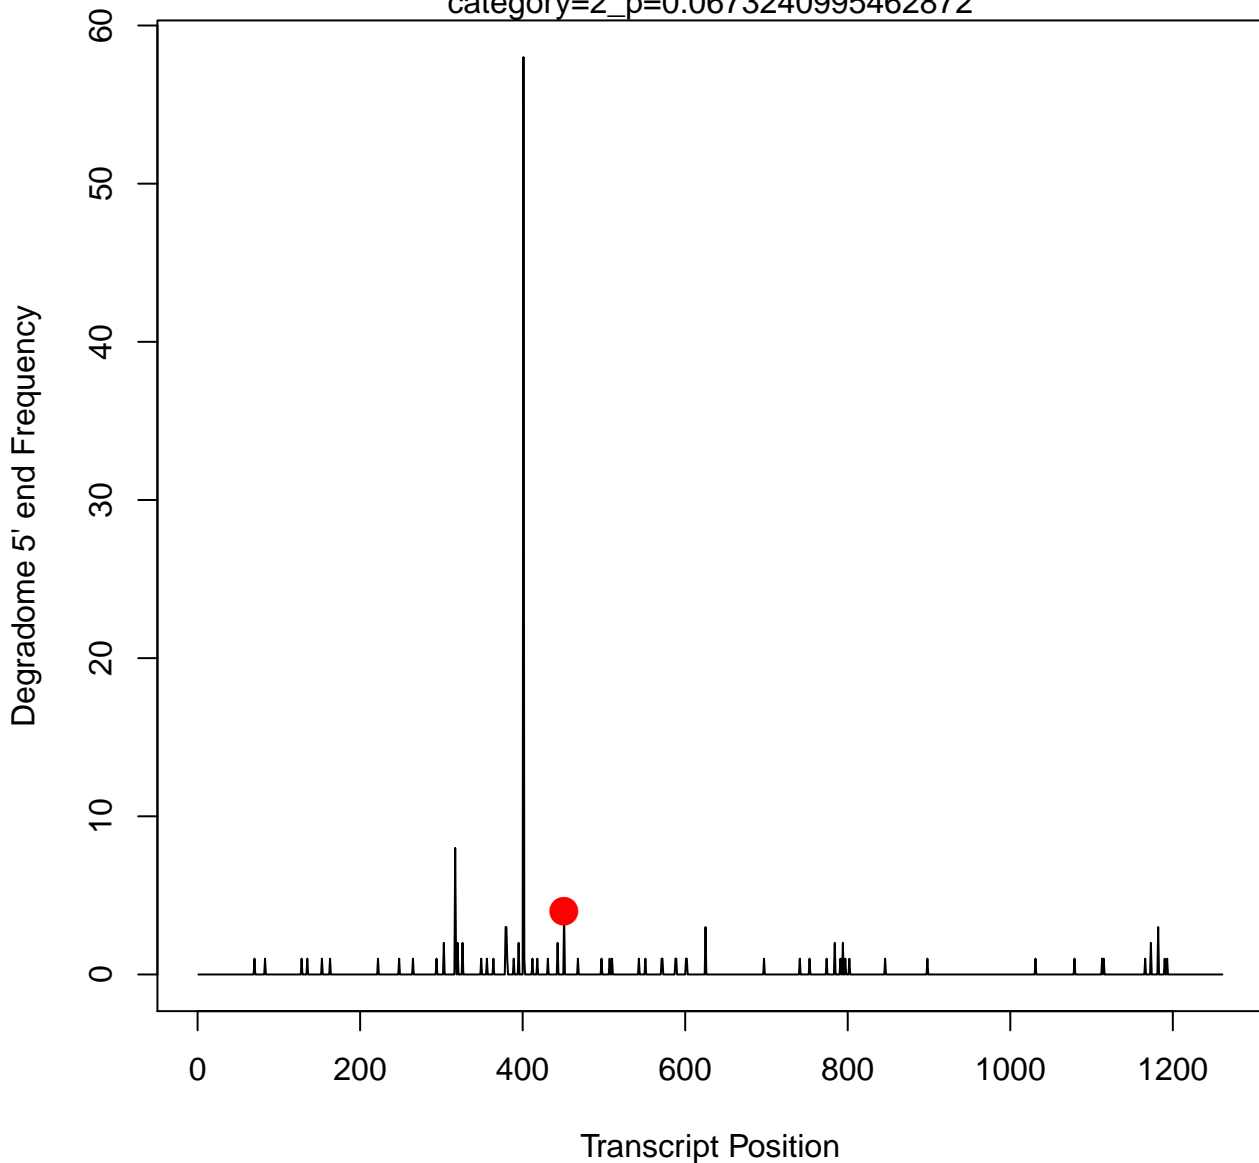

Supplement: s1 [file s1]

**T=Cluster-18410.73242\_Q=novel\_35\_S=467**

category=0\_p=0.0620220057685188

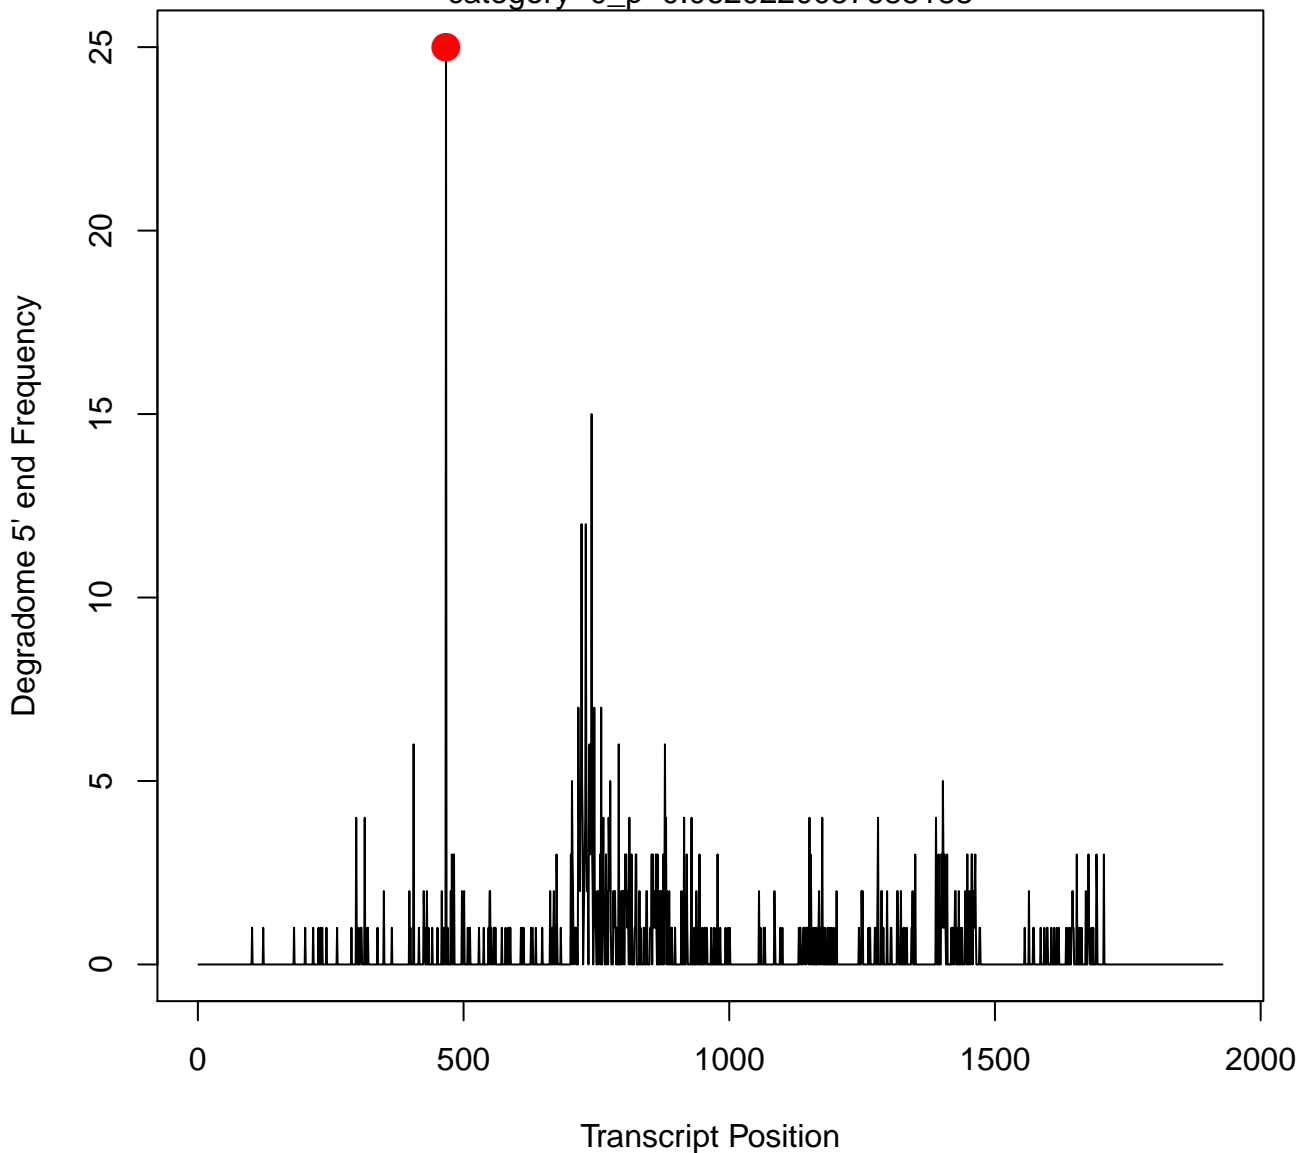

Supplement: s1 [file s1]

**T=Cluster-18410.46879\_Q=novel\_148\_S=120**

category=0\_p=0.0818290822186718

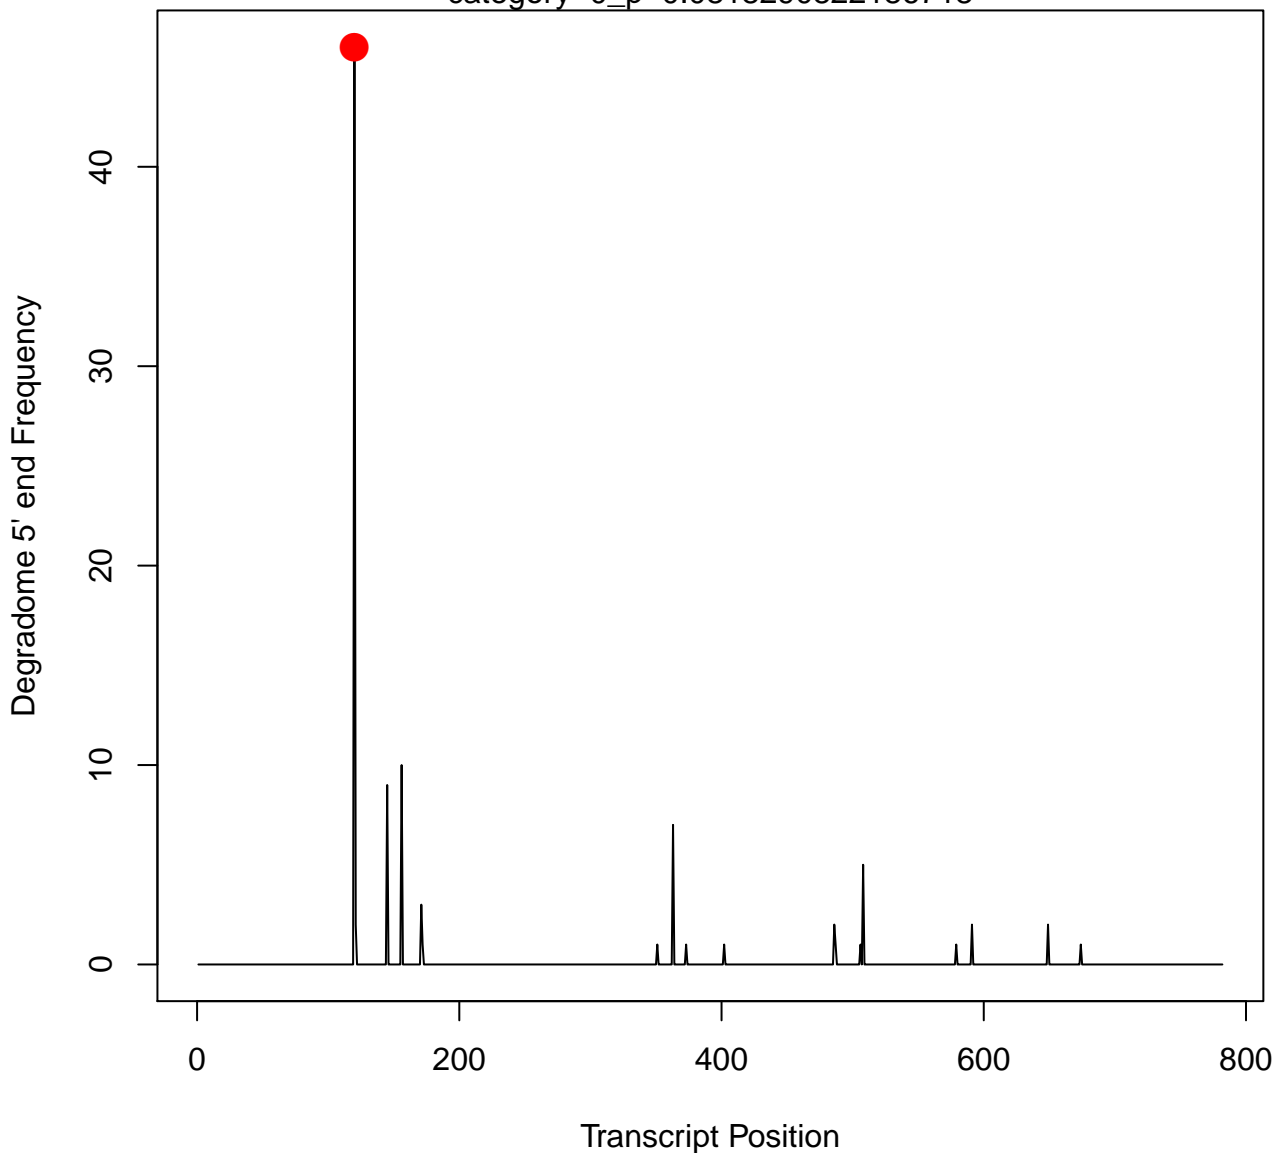

Supplement: s1 [file s1]

**T=Cluster-18410.32924\_Q=pma-miR319\_S=2304**

category=0\_p=0.005185427902343

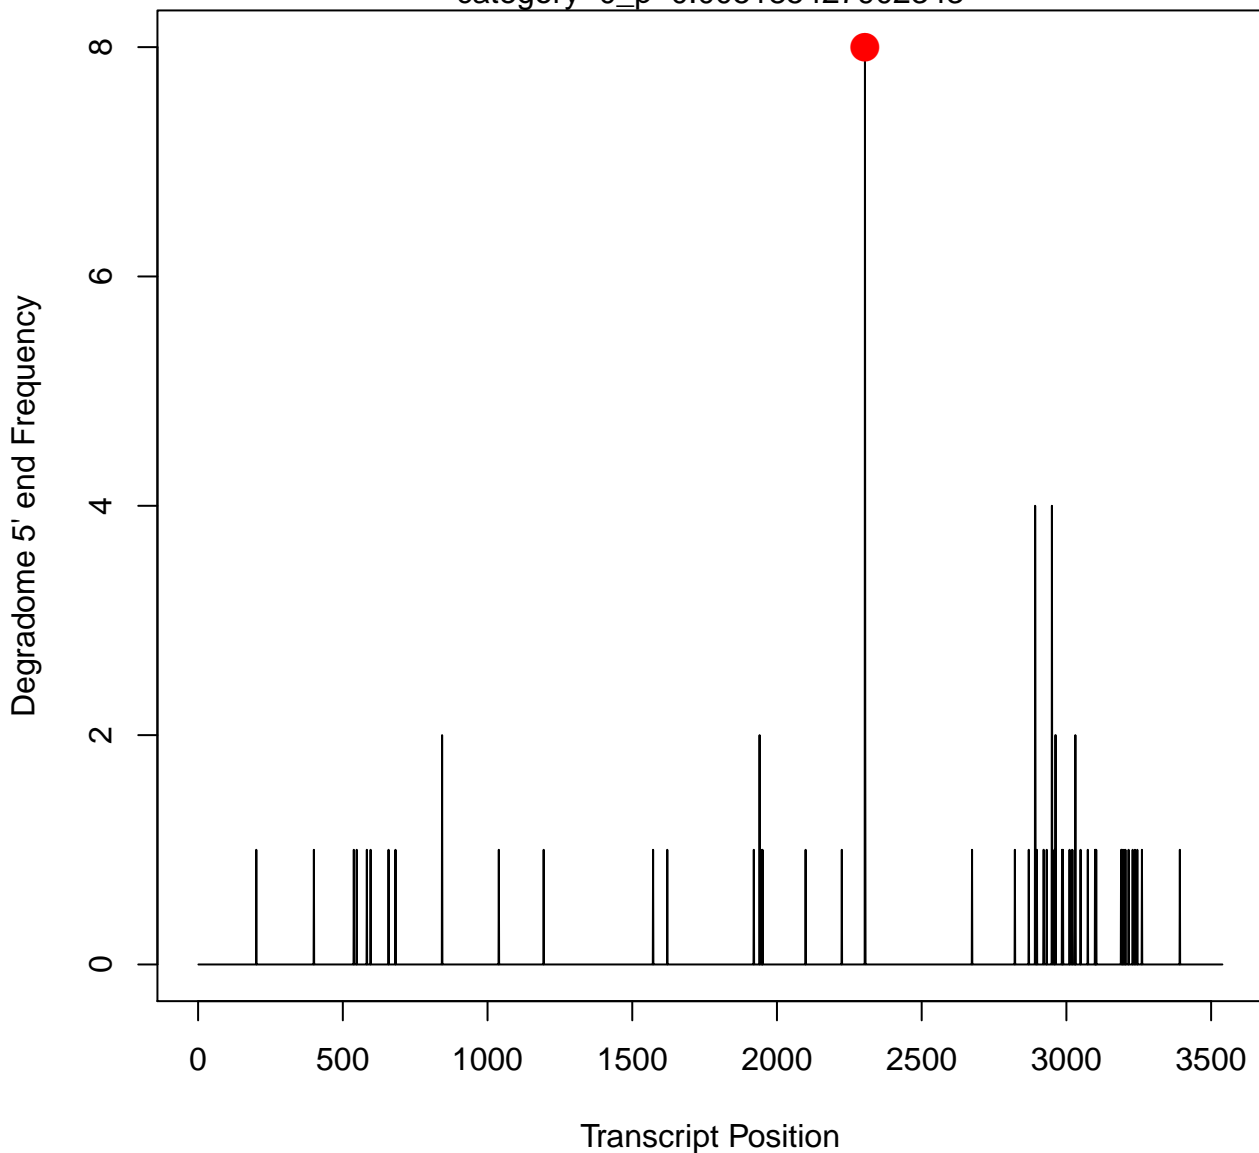

Supplement: s1 [file s1]

**T=Cluster-18410.79384\_Q=novel\_27\_S=213**

category=0\_p=0.00164041690342198

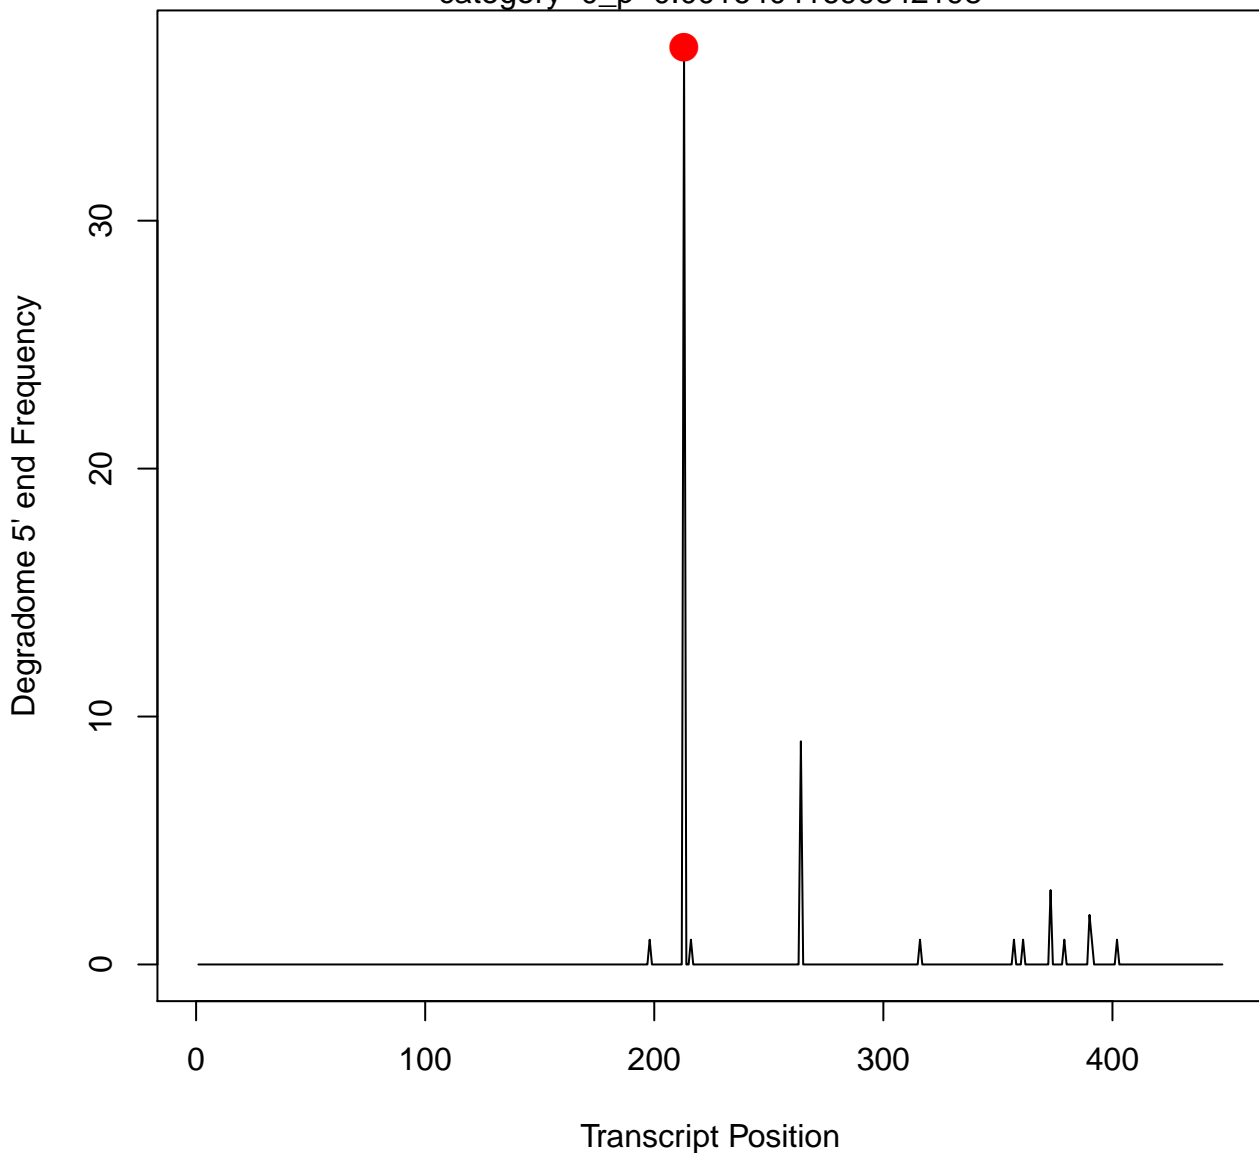

Supplement: s1 [file s1]

**T=Cluster-18410.70689\_Q=novel\_20\_S=1876**

category=0\_p=0.00763228970729513

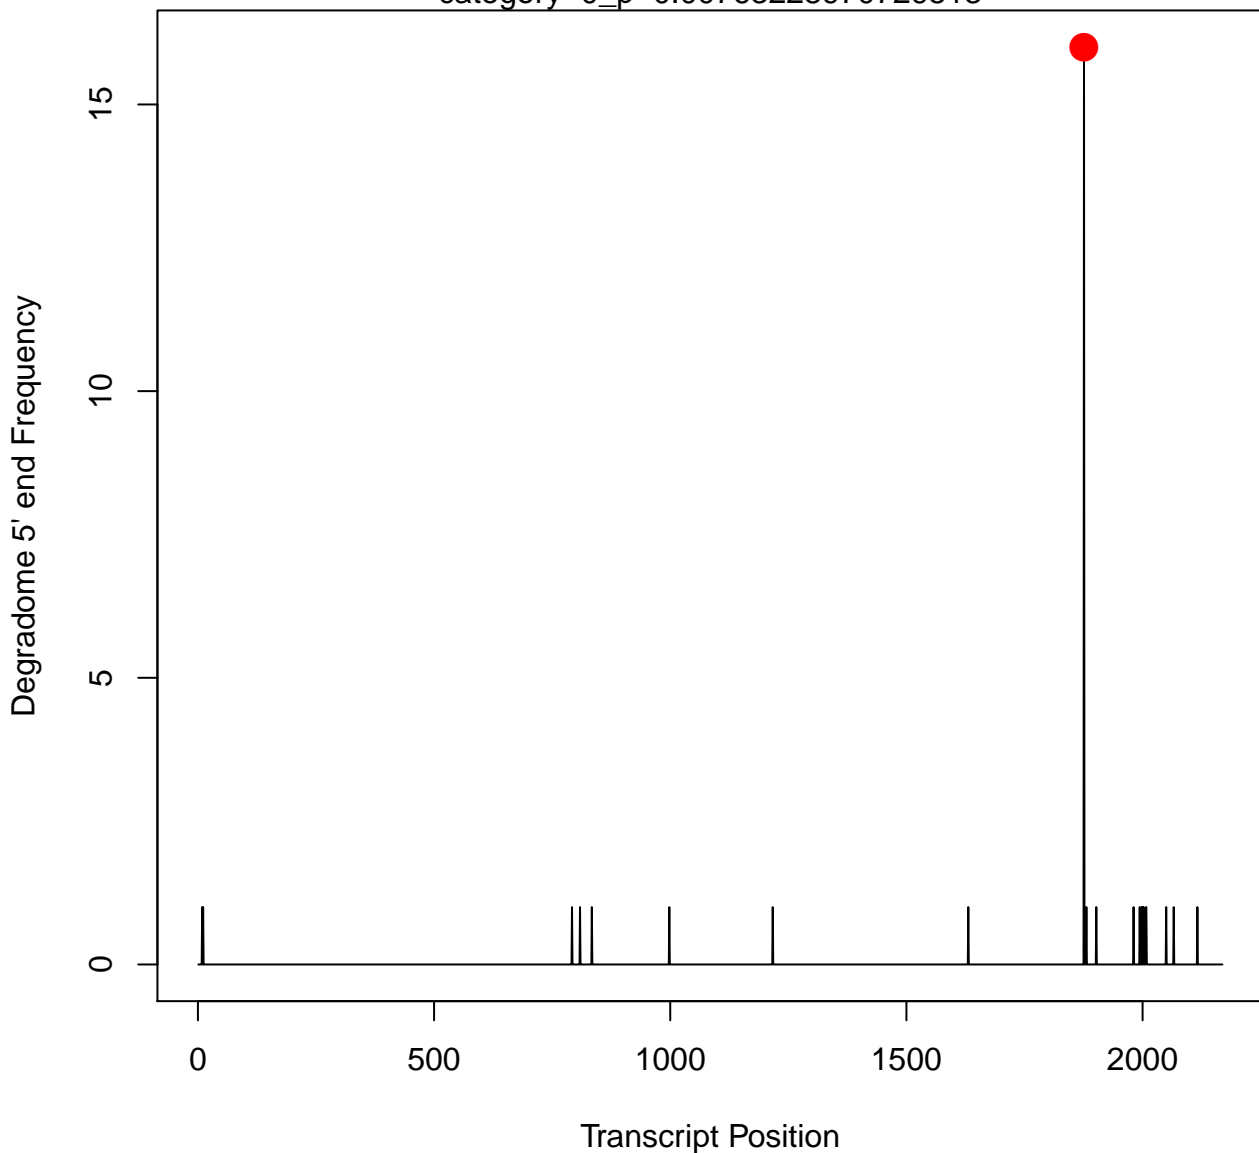

Supplement: s1 [file s1]

**T=Cluster-18410.111005\_Q=novel\_21\_S=234**

category=0\_p=0.00600171812373296

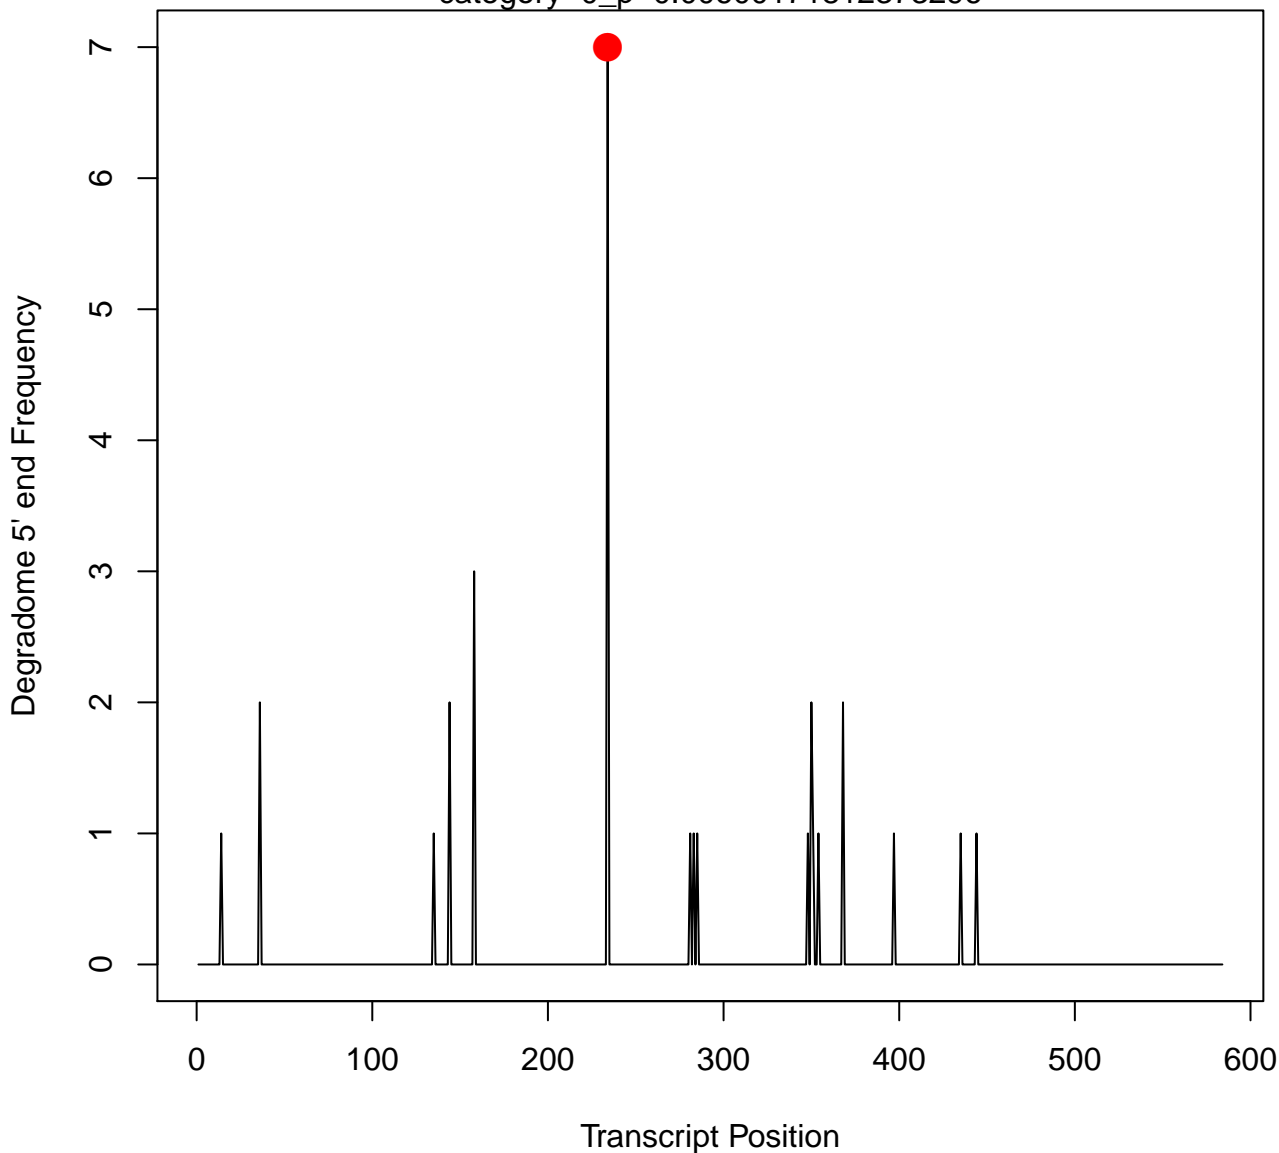

Supplement: s1 [file s1]

**T=Cluster-18778.0\_Q=pma-miR482a\_S=345**

category=0\_p=0.0820802844876299

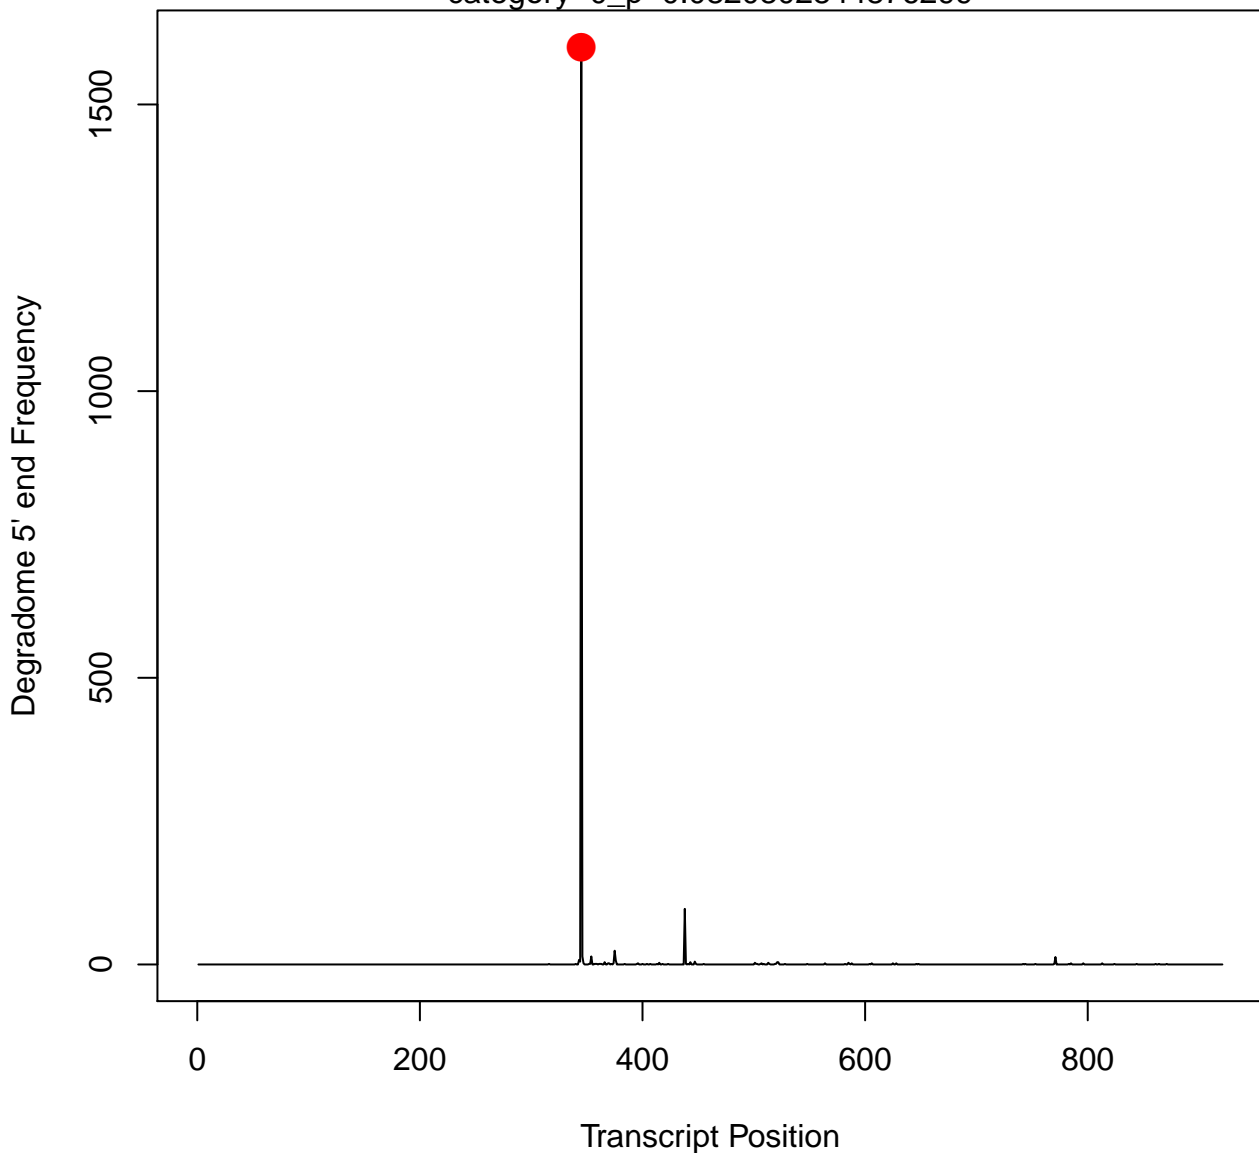

Supplement: s1 [file s1]

**T=Cluster-18410.67429\_Q=novel\_47\_S=345**

category=0\_p=0.00191355797950399

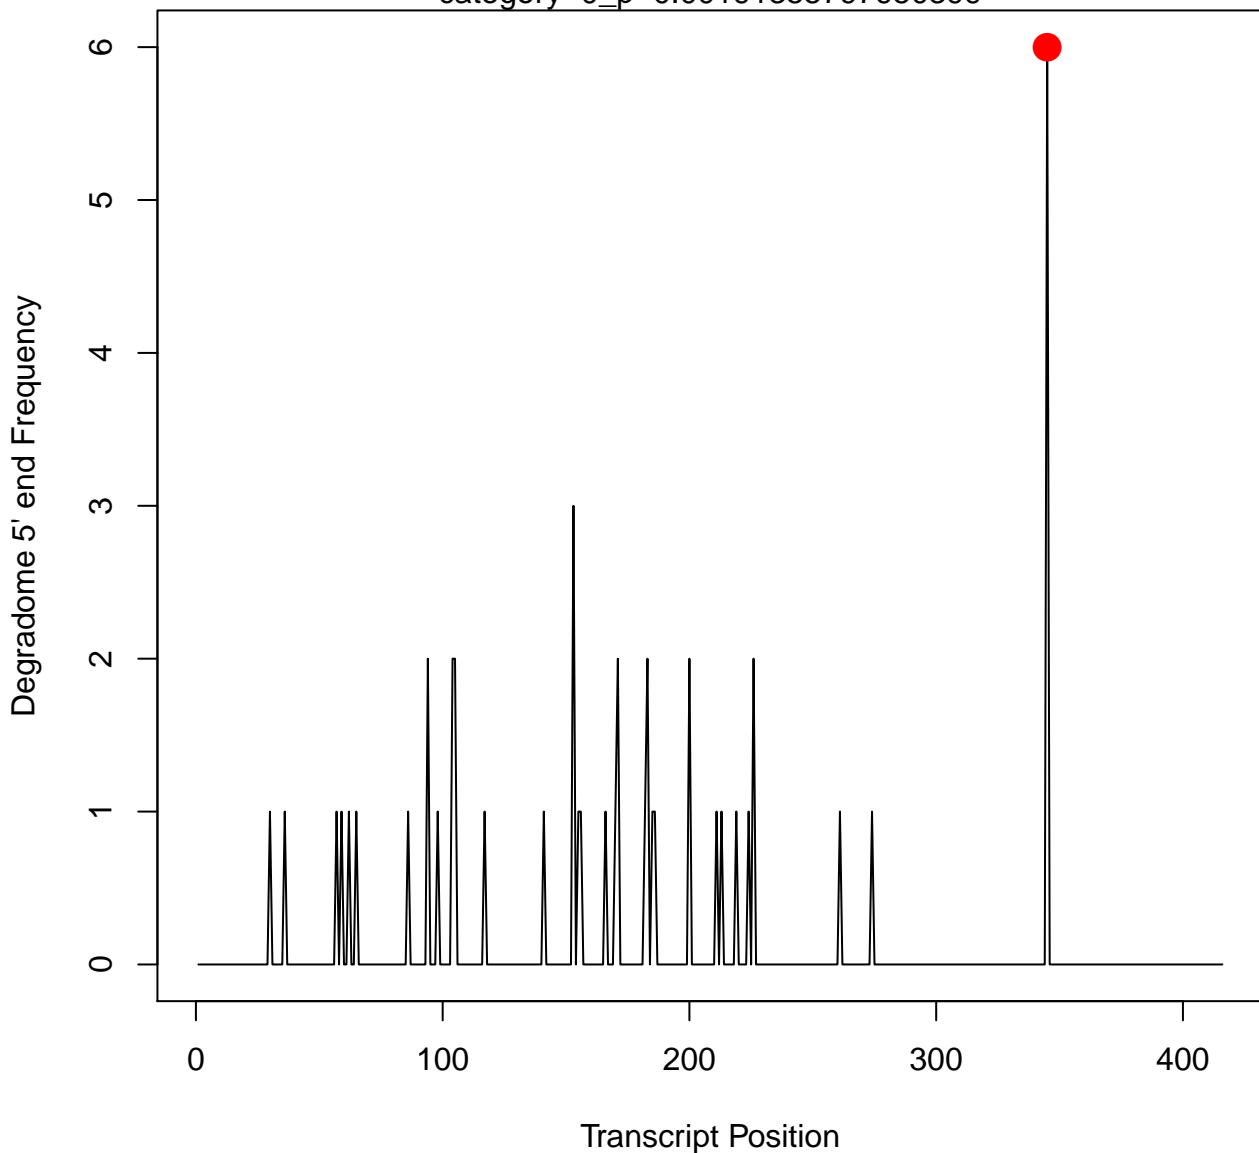

Supplement: s1 [file s1]

**T=Cluster-18410.96775\_Q=pma-miR946a-3p\_S=2647**

category=0\_p=0.0264591337714422

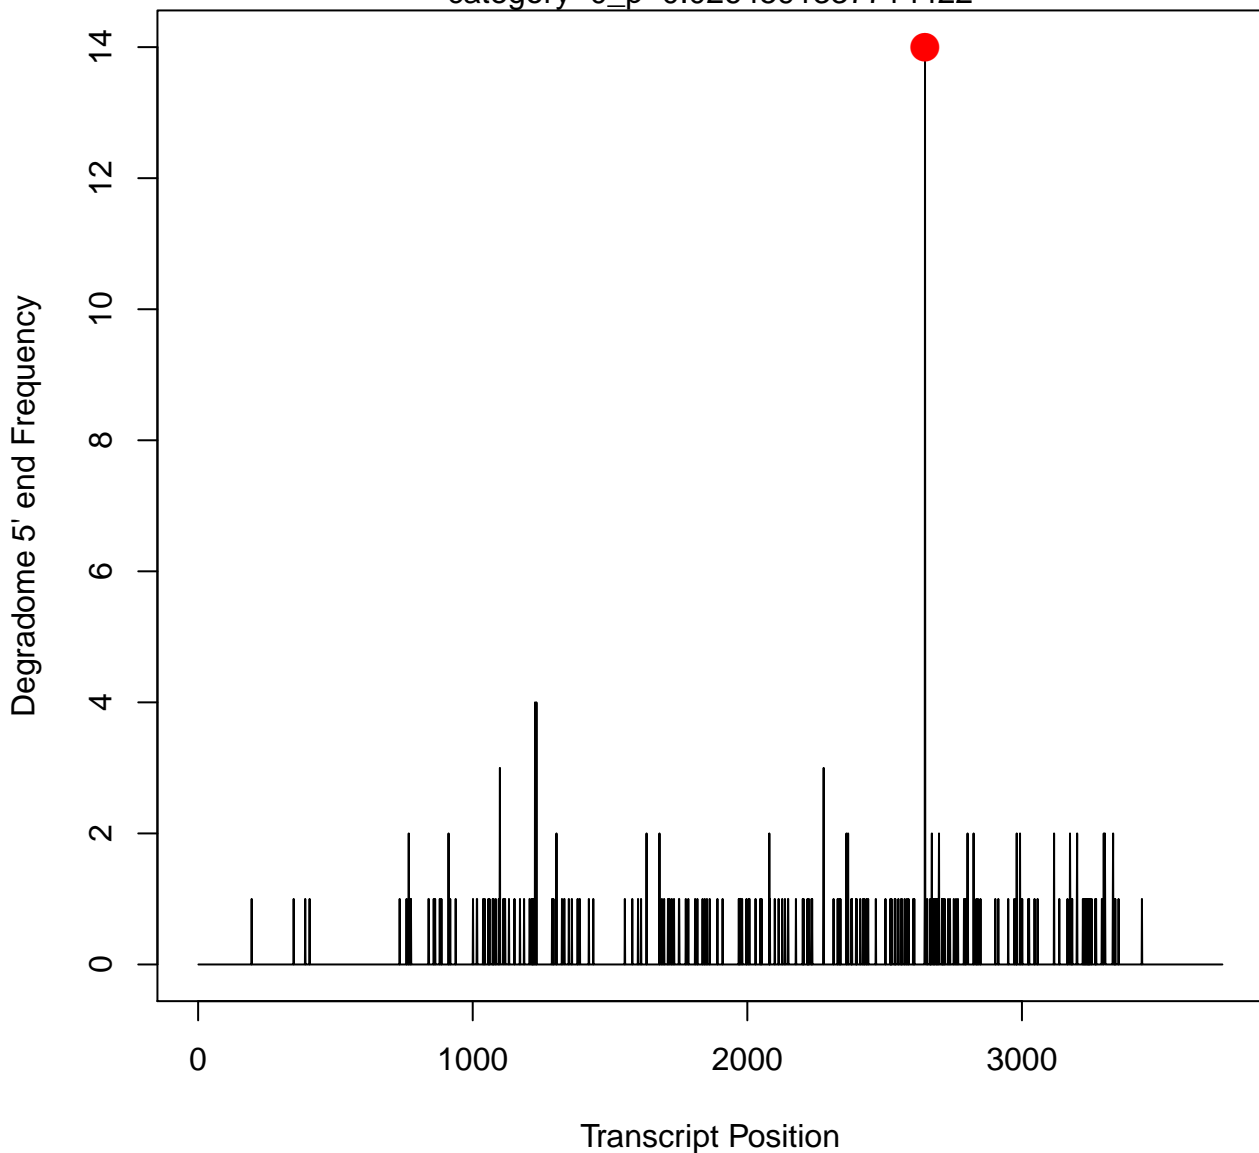

Supplement: s1 [file s1]

**T=Cluster-18410.110062\_Q=novel\_116\_S=480**

category=0\_p=0.0264591337714422

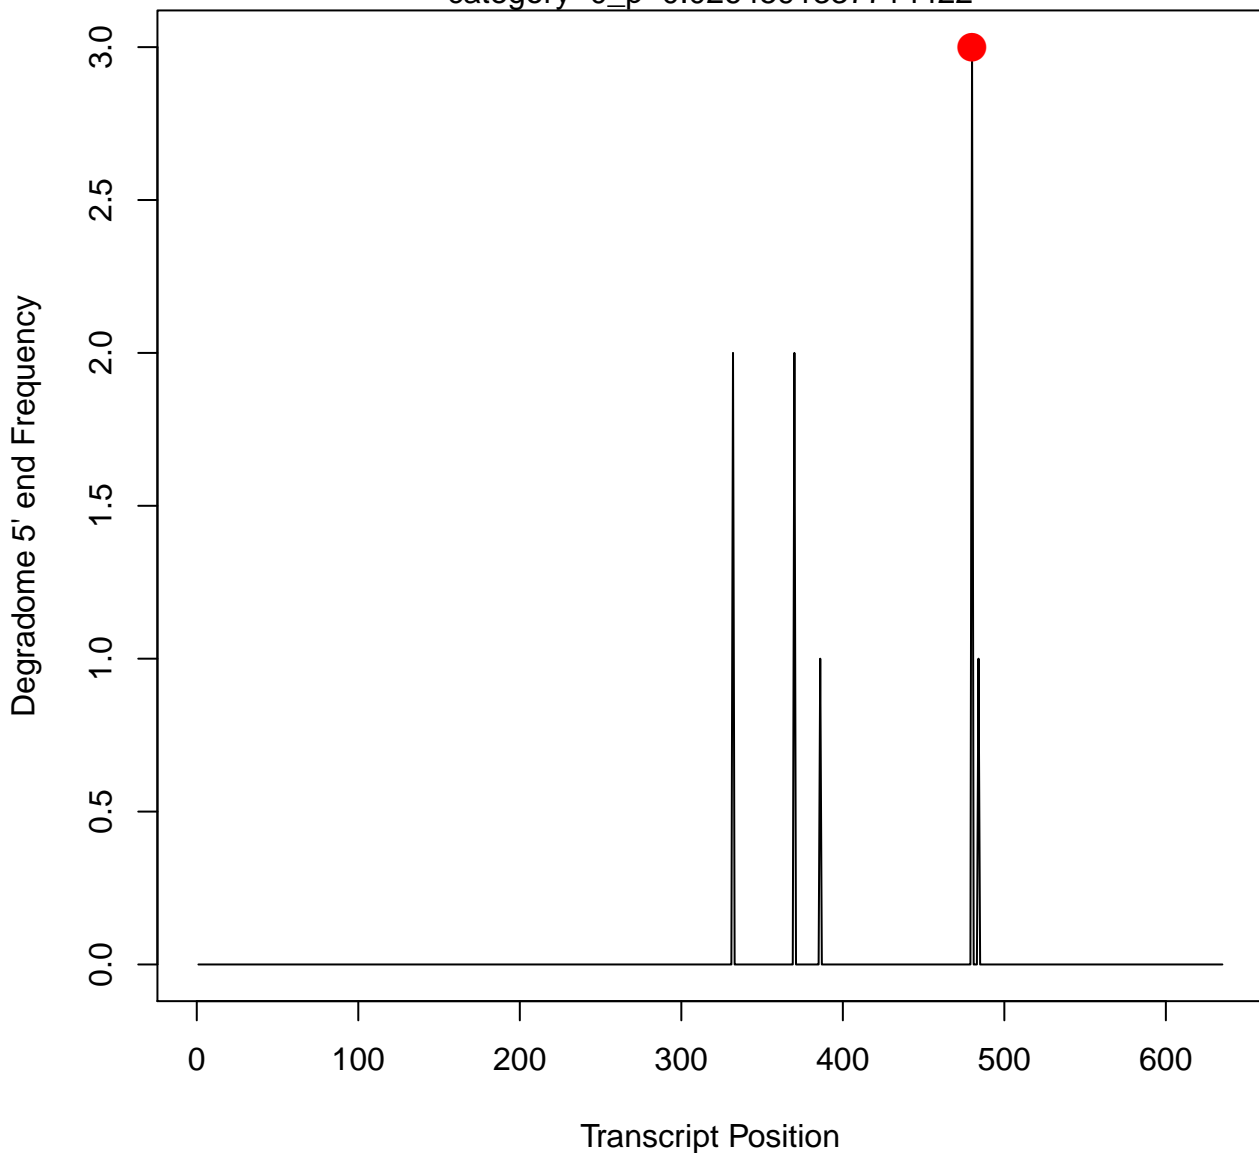

Supplement: s1 [file s1]

**T=Cluster-18410.78668\_Q=novel\_60\_S=883**

category=2\_p=0.0564267304887326

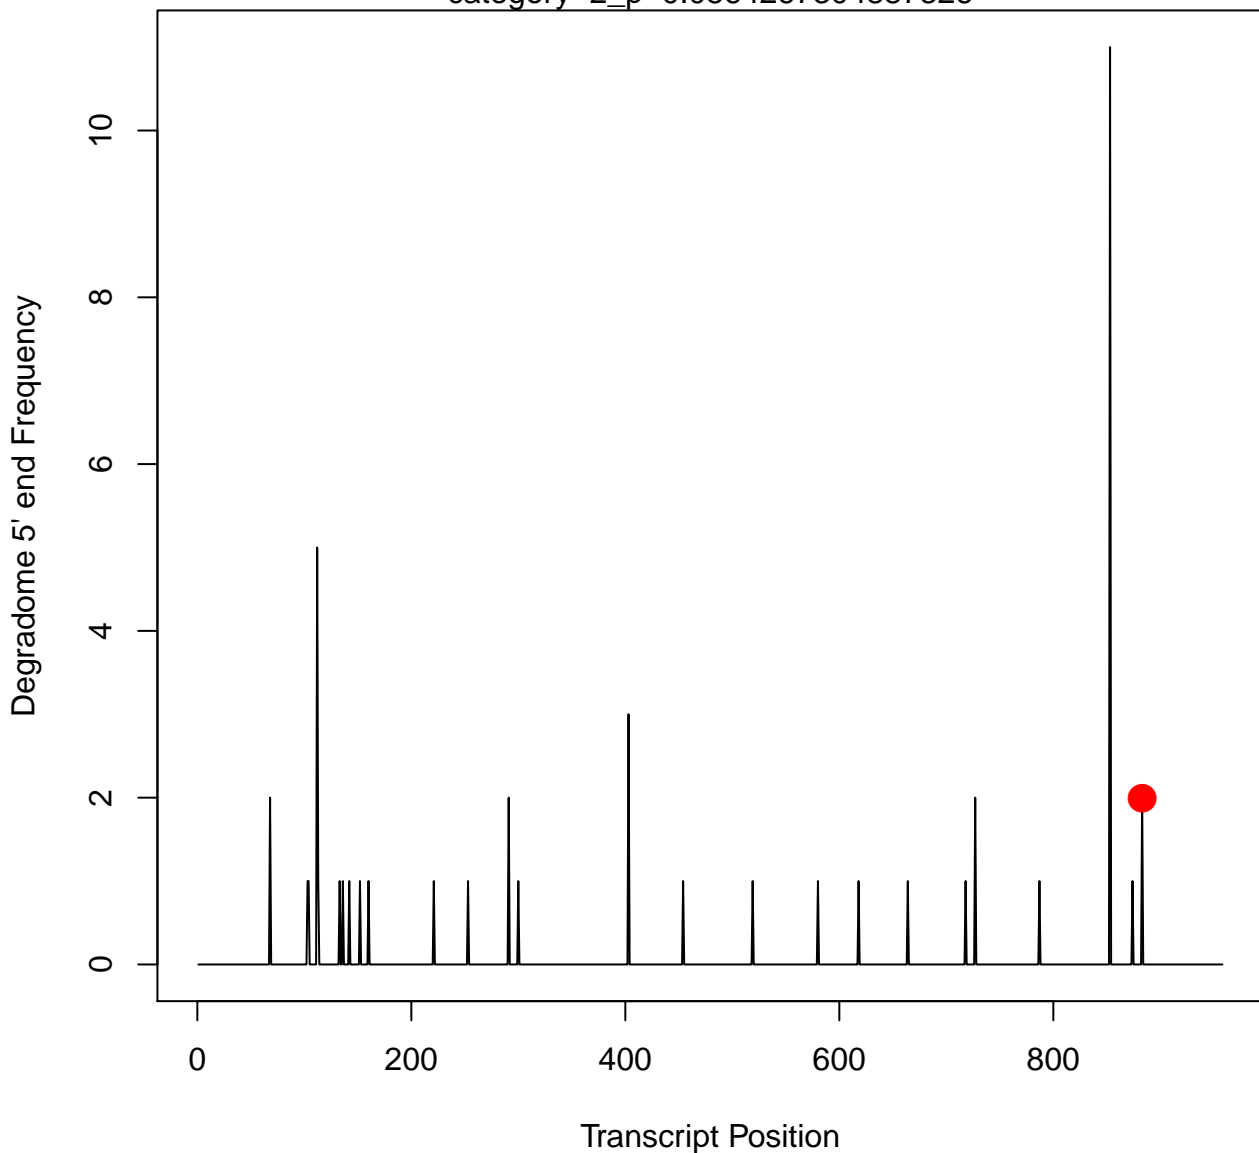

Supplement: s1 [file s1]

**T=Cluster-20177.1\_Q=novel\_9\_S=1472**

category=0\_p=0.00817521894783257

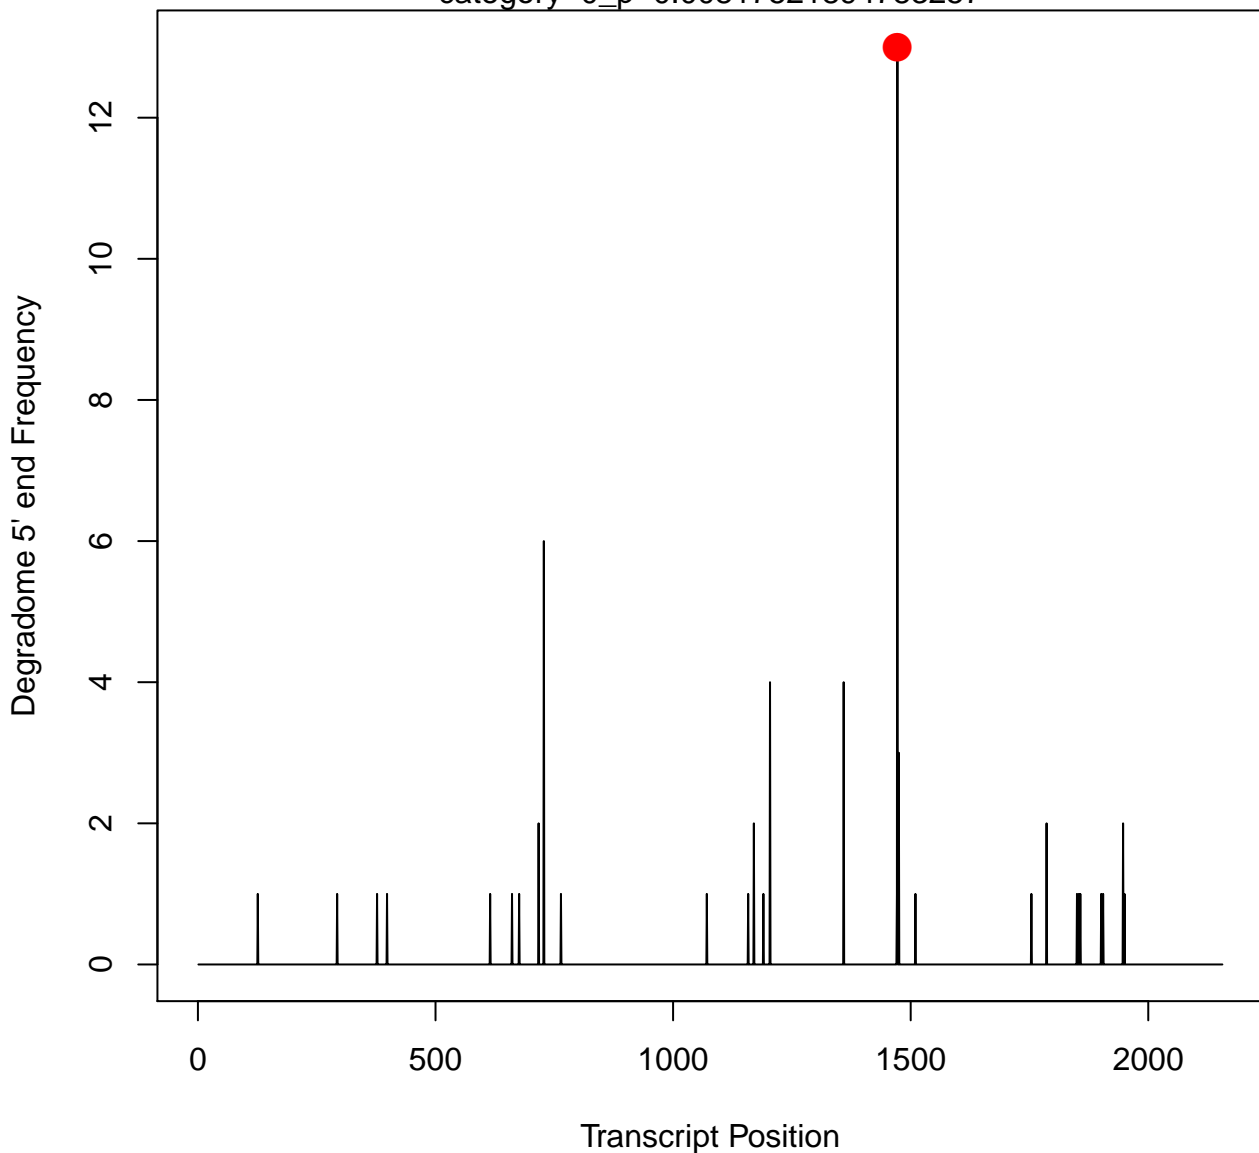

Supplement: s1 [file s1]

**T=Cluster-18410.34600\_Q=novel\_148\_S=812**

category=0\_p=0.0133182548417358

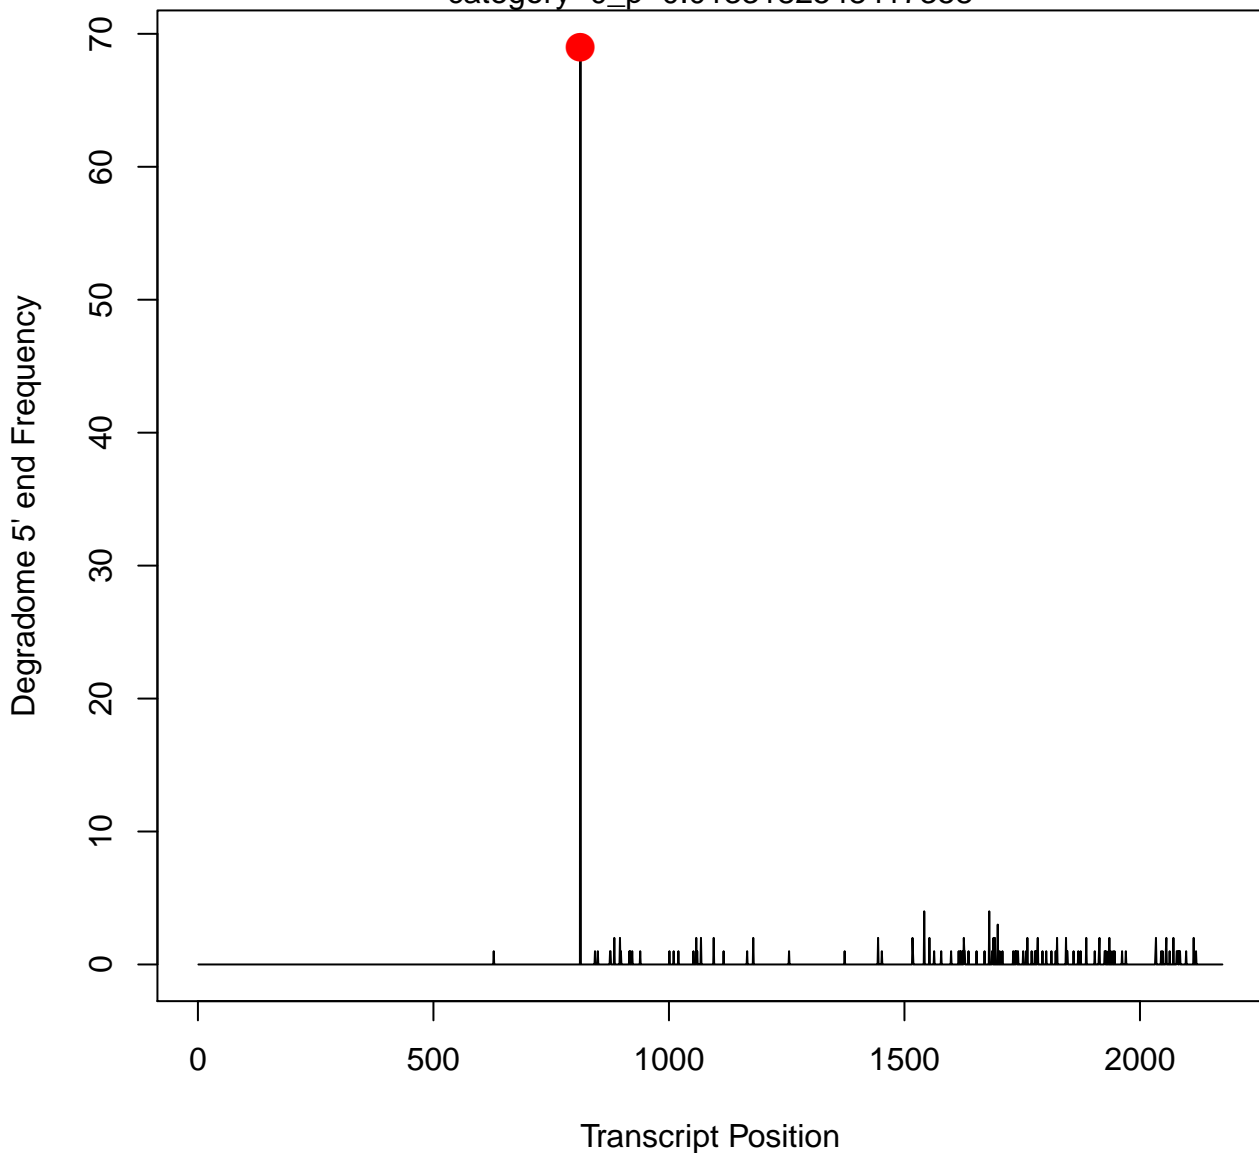

Supplement: s1 [file s1]

**T=Cluster-18410.91299\_Q=novel\_6\_S=131**

category=0\_p=0.0750205735315349

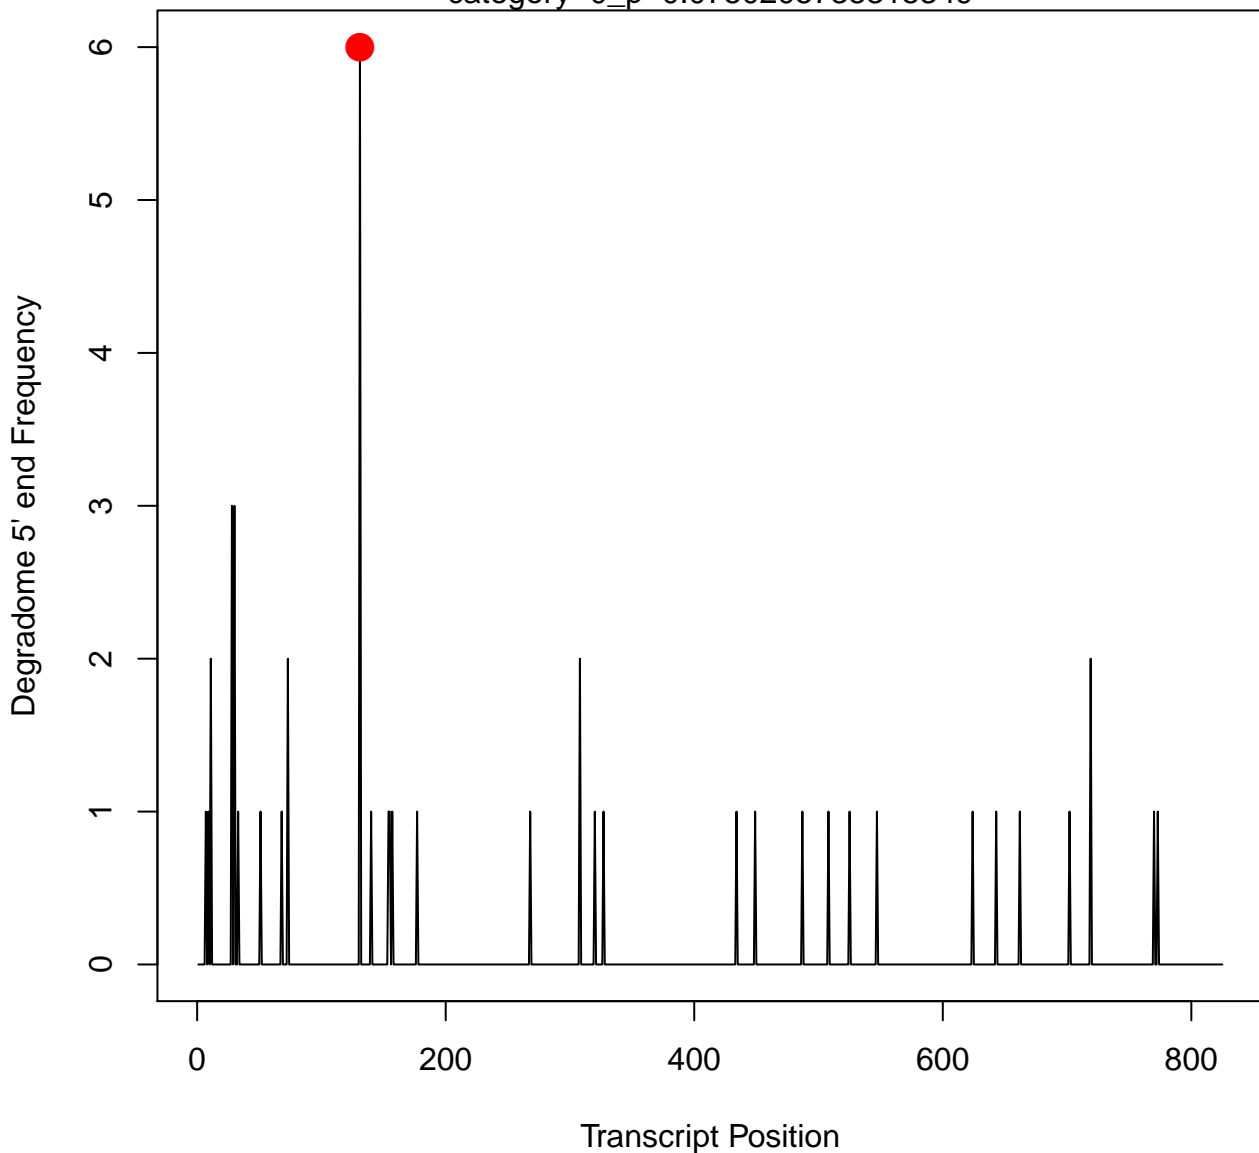

Supplement: s1 [file s1]

**T=Cluster-18410.75026\_Q=novel\_20\_S=1837**

category=0\_p=0.00844657216822353

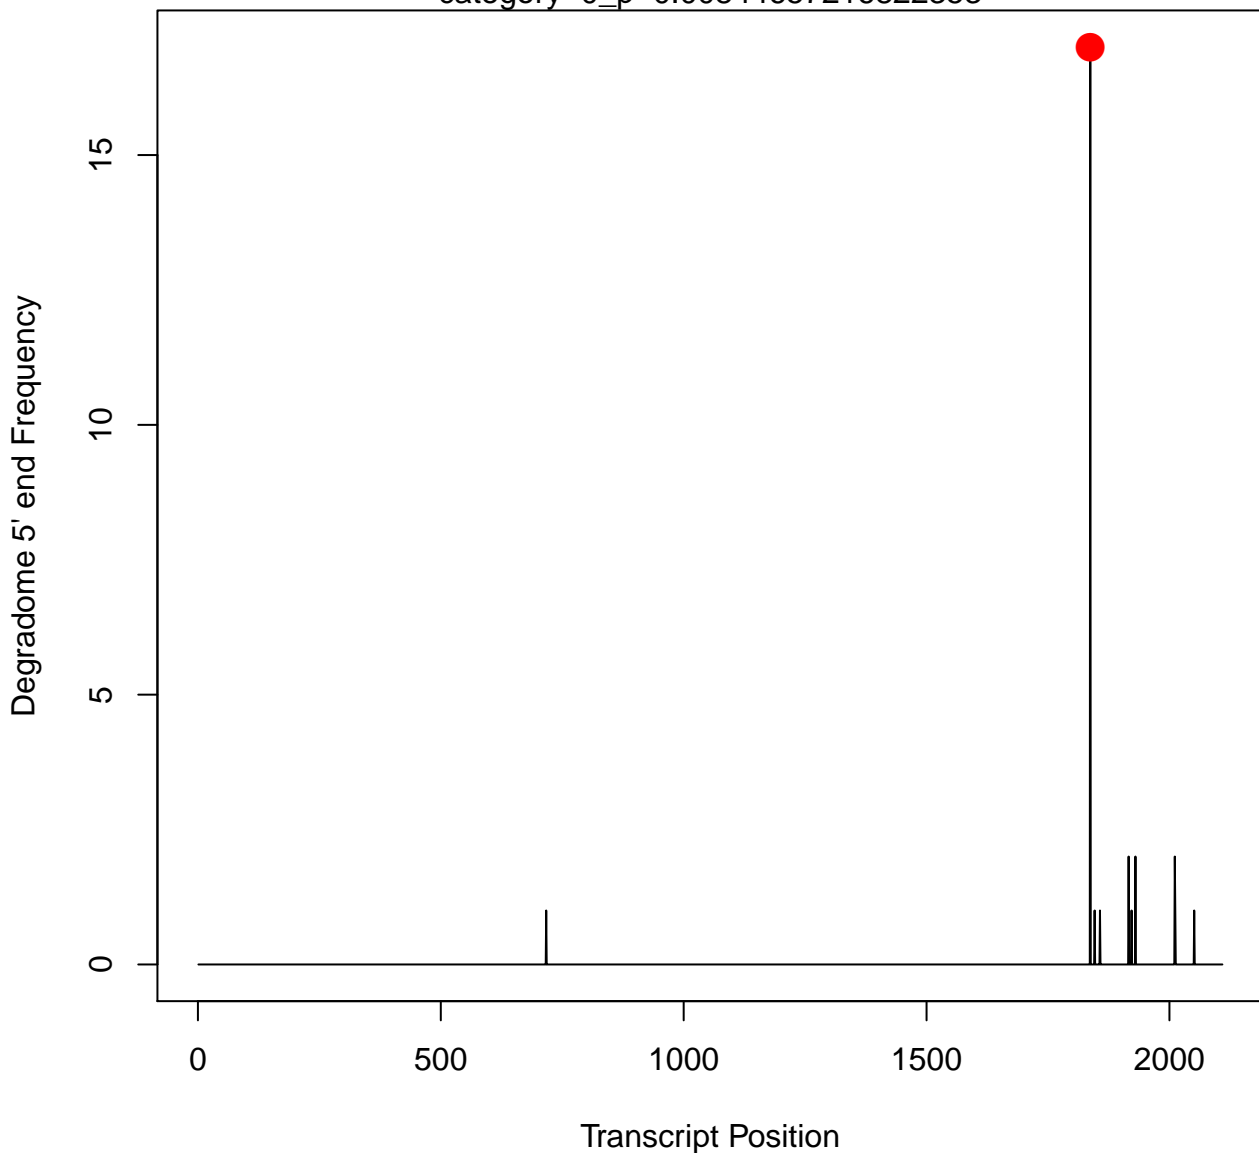

Supplement: s1 [file s1]

**T=Cluster-18410.13944\_Q=novel\_21\_S=714**

category=0\_p=0.00191355797950399

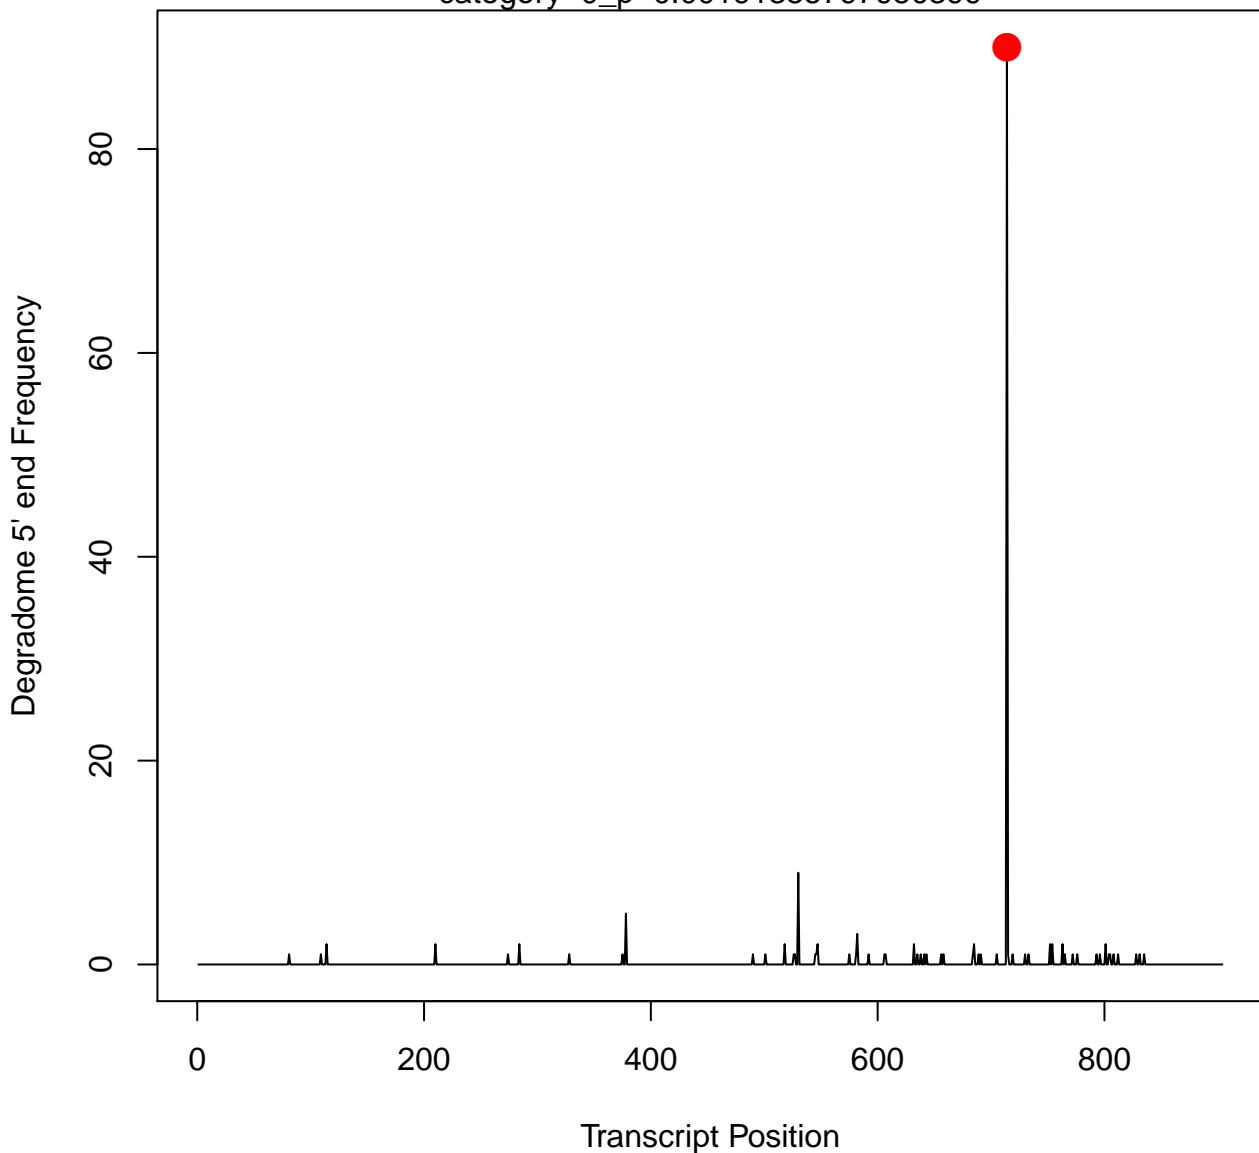

Supplement: s1 [file s1]
